# Supplementary material
Source: bioRxiv or medRxiv preprint supplement (https://www.biorxiv.org/content/biorxiv/early/2022/05/26/2022.05.26.493529/DC1/embed/media-1.pdf)
Supplement: Supplementary file [file media-1.pdf]

We gratefully acknowledge the following Authors from the Originating laboratories responsible for obtaining the specimens, as well as the Submitting laboratories where the genome data were generated and shared via GISAID, on which this research is based.

All Submitters of data may be contacted directly via [www.gisaid.org](http://www.gisaid.org)

Authors are sorted alphabetically.

Acknowledgement EPI\_SET Identifier: EPI\_SET\_20220304zu

| Accession ID                                                                                                          | Originating Laboratory                                                                                                                                                                                                                                                                                                                                                                                                                                                                                                                                                                                                                                                                                                                                                           | Submitting Laboratory                                                                                                                                                  | Authors                                                                                                                                                                                                                                                                                                                                                                                                                                                                                                                                                                                                                                                                                                                                                                                                                                                                                                                                                                                                                                                                 |
|-----------------------------------------------------------------------------------------------------------------------|----------------------------------------------------------------------------------------------------------------------------------------------------------------------------------------------------------------------------------------------------------------------------------------------------------------------------------------------------------------------------------------------------------------------------------------------------------------------------------------------------------------------------------------------------------------------------------------------------------------------------------------------------------------------------------------------------------------------------------------------------------------------------------|------------------------------------------------------------------------------------------------------------------------------------------------------------------------|-------------------------------------------------------------------------------------------------------------------------------------------------------------------------------------------------------------------------------------------------------------------------------------------------------------------------------------------------------------------------------------------------------------------------------------------------------------------------------------------------------------------------------------------------------------------------------------------------------------------------------------------------------------------------------------------------------------------------------------------------------------------------------------------------------------------------------------------------------------------------------------------------------------------------------------------------------------------------------------------------------------------------------------------------------------------------|
| EPI_ISL_1711913                                                                                                       | "AZ SPHL, Arizona Department of Health Services"                                                                                                                                                                                                                                                                                                                                                                                                                                                                                                                                                                                                                                                                                                                                 | Centers for Disease Control and Prevention Division of Viral Diseases, Pathogen Discovery                                                                              | Alison Laufer Halpin; Ben L. Rambo-Martin; Clinton R. Paden; Dakota Howard; Darlene Wagner; Dave Wentworth; Dhvani Batra; Jasmine Padilla; Justin Lee; Katie Dillon; Krista Queen; Kristen Knipe; Kristine Lacek; Mark Burroughs; Matthew Schmeirer; Milli Sheth; Peter Cook; Sam Shepard; Sarah Nobles; Shoshona Le; Suxiang Tong; Vivien Dugan; Yvette Unoarumhi                                                                                                                                                                                                                                                                                                                                                                                                                                                                                                                                                                                                                                                                                                      |
| EPI_ISL_2787471                                                                                                       | "NM Dept. Health, Scientific Laboratory Division "                                                                                                                                                                                                                                                                                                                                                                                                                                                                                                                                                                                                                                                                                                                               | Centers for Disease Control and Prevention Division of Viral Diseases, Pathogen Discovery                                                                              | Alison Laufer Halpin; Ben L. Rambo-Martin; Clinton R. Paden; Dakota Howard; Darlene Wagner; Dave Wentworth; Dhvani Batra; Jasmine Padilla; Justin Lee; Katie Dillon; Krista Queen; Kristen Knipe; Kristine Lacek; Mark Burroughs; Matthew Schmeirer; Milli Sheth; Peter Cook; Sam Shepard; Sarah Nobles; Shoshona Le; Suxiang Tong; Vivien Dugan; Yvette Unoarumhi                                                                                                                                                                                                                                                                                                                                                                                                                                                                                                                                                                                                                                                                                                      |
| EPI_ISL_2787588, EPI_ISL_2787593                                                                                      | "PA Department of Health, Bureau of Laboratories"                                                                                                                                                                                                                                                                                                                                                                                                                                                                                                                                                                                                                                                                                                                                | Centers for Disease Control and Prevention Division of Viral Diseases, Pathogen Discovery                                                                              | Alison Laufer Halpin; Ben L. Rambo-Martin; Clinton R. Paden; Dakota Howard; Darlene Wagner; Dave Wentworth; Dhvani Batra; Jasmine Padilla; Justin Lee; Katie Dillon; Krista Queen; Kristen Knipe; Kristine Lacek; Mark Burroughs; Matthew Schmeirer; Milli Sheth; Peter Cook; Sam Shepard; Sarah Nobles; Shoshona Le; Suxiang Tong; Vivien Dugan; Yvette Unoarumhi                                                                                                                                                                                                                                                                                                                                                                                                                                                                                                                                                                                                                                                                                                      |
| EPI_ISL_1502778                                                                                                       | 1. Główny Inspektorat Sanitarny. 2. Diagnostyka. Laboratoria Medyczne.                                                                                                                                                                                                                                                                                                                                                                                                                                                                                                                                                                                                                                                                                                           | 1. ViroGenetics - BSL3 Laboratory of Virology, Malopolska Centre of Biotechnology, Jagiellonian University; 2. genXone SA, Research & Development Laboratory           | Aleksandra Gidlewicz; Anna Brylak; Gromowski, T.; Grzegorz Nowicki; Jakub Grabowski; Karol Szeszko; Kowalski, M.; Labaj; Maciej Sykulski; Mazur-Panasiuk, N.; Michal Kaszuba; Natalia Drweska-Matelska; P.P.; Pyrc, K.; Sylwia Januszcza; Szulc, P.; Łukasz Krych                                                                                                                                                                                                                                                                                                                                                                                                                                                                                                                                                                                                                                                                                                                                                                                                       |
| EPI_ISL_1577283                                                                                                       | 1.AO Universitaria 'S. Giovanni di Dio e Ruggi D'Aragona, Scuola Medica Salernitana' Hospital / 2.UOC di Virologia e Microbiologia, Università della Campania 'L. Vanvitelli' / 3.AO Universitaria 'Federico II' Napoli Hospital / 4.AORN 'San Giuseppe Moscati' Avellino Hospital / 5.AO 'San Pio - presidio G. Rummo' Benevento Hospital / 6.AO 'Sant'Anna e San Sebastiano' Caserta Hospital / 7.PO 'Maria Santissima Addolorata' Eboli Hospital / 8.Biogen Istituto di Ricerche Genetiche / 9. U.O.C. di Genetica Medica e di Laboratorio A.O.R.N., Azienda Ospedaliera di Rilievo Nazionale Antonio Cardarelli, Napoli / 10. Centro di riferimento Oncologico della Basilicata (IRCCS-CROB), Rionero in Vulture (PZ) / 11. Presidio Ospedaliero di Agropoli, Agropoli (SA). | 1. Genome Research Center for Health (CRGS) / 2. Laboratory of Molecular Medicine and Genomics(LMMGE) / 3. Center for Research in Pure and Applied Mathematics (CRMPA) | Alessandro Weisz (Corresponding Author); Alessia Cossu; Andreina Baj; Aniello Gentile; Annamaria Salvati; Antonello Saccomanno; Arnolfo Petruzzello; Assunta Sellitto; Carlo Ferravante; Domenico Memoli; Domenico Palumbo; Edmondo Adoriso; Elena Alexandrova; Emilia Vaccaro; Fausto Sessa.; Francesca Marciano; Francesca Rizzo (Corresponding Author); Francesco Curcio; Gianluigi Franci; Giorgio Dirani; Giorgio Giurato (Corresponding Author); Giovanni Nassa; Giovanni Pecoraro; Giuseppe Fenza; Giuseppe Portella; Gregorio Goffredi; Ilaria Terenzi; Jessica Lamberti; Maddalena Schioppa; Maria Grazia Foti; Maria Landi; Marianna Scrima; Mariarosaria Ingino; Massimiliano Galdiero; Maurizio Fumi; Michela Iacobellis; Michele Caraglia; Michele Cennamo; Morena D'Avena; Oriana Strianese; Pasquale Pagliano; Rita Greco; Roberta Tarallo; Rosanna Pilusico; Silvia Zanolì; Simona Semprini; Sonia Amabile; Stefania Marzinotto; Teresa Rocco; Valeria Mirici Cappa; Vincenzo Rocco; Viola Melone; Vittoria Letizia; Vittorio Sambrì; Ylenia D'Agostino |
| EPI_ISL_3187049, EPI_ISL_3187050, EPI_ISL_3281165, EPI_ISL_3281286                                                    | 4Cyte Pathology                                                                                                                                                                                                                                                                                                                                                                                                                                                                                                                                                                                                                                                                                                                                                                  | NSW Health Pathology - Institute of Clinical Pathology and Medical Research; Westmead Hospital; University of Sydney                                                   | Arnott A.; Draper J.; Gall M.; Martinez E.; Rockett R.; Sintchenko V.; on behalf of ICPMR                                                                                                                                                                                                                                                                                                                                                                                                                                                                                                                                                                                                                                                                                                                                                                                                                                                                                                                                                                               |
| EPI_ISL_3204399, EPI_ISL_3204409                                                                                      | ABC Algarve                                                                                                                                                                                                                                                                                                                                                                                                                                                                                                                                                                                                                                                                                                                                                                      | Instituto Nacional de Saude (INSA)                                                                                                                                     | Borges et al                                                                                                                                                                                                                                                                                                                                                                                                                                                                                                                                                                                                                                                                                                                                                                                                                                                                                                                                                                                                                                                            |
| EPI_ISL_1302891                                                                                                       | ADMED Microbiologie                                                                                                                                                                                                                                                                                                                                                                                                                                                                                                                                                                                                                                                                                                                                                              | Genomics and Transcriptomics, Philip Morris International                                                                                                              | David Bornand; Emmanuel Guedj; Manuel Peitsch; Marie-Lise Tritten; Maxime Berthouzoz; Mehdi Auberson; Nicolas Sierro; Nikolai Ivanov; Reto Lienhard; Rémi Dulize                                                                                                                                                                                                                                                                                                                                                                                                                                                                                                                                                                                                                                                                                                                                                                                                                                                                                                        |
| EPI_ISL_1695480, EPI_ISL_1695485                                                                                      | AGEN                                                                                                                                                                                                                                                                                                                                                                                                                                                                                                                                                                                                                                                                                                                                                                             | CNR Virus des Infections Respiratoires - France SUD                                                                                                                    | Antonin Bal; Bruno Lina; Bruno Simon; Gregory Destras; Gwendolyne Burfin; Hadrien Regue; Laurence Josset; Martine Valette; Quentin Semanas                                                                                                                                                                                                                                                                                                                                                                                                                                                                                                                                                                                                                                                                                                                                                                                                                                                                                                                              |
| EPI_ISL_3235651                                                                                                       | ALBANY MEDICAL CENTER                                                                                                                                                                                                                                                                                                                                                                                                                                                                                                                                                                                                                                                                                                                                                            | Wadsworth Center, New York State Department of Health                                                                                                                  | Alexis Russell; Catharine Prussing; Daryl M. Lamson; Erasmus Schneider; Erica Lasek-Nesselquist; John Kelly; Jonathan Plitnick; Kirsten St. George; Matthew Shudt; Melissa A Leisner; Navjot Singh                                                                                                                                                                                                                                                                                                                                                                                                                                                                                                                                                                                                                                                                                                                                                                                                                                                                      |
| EPI_ISL_6573809                                                                                                       | AMALAB/FACISA/UFRN                                                                                                                                                                                                                                                                                                                                                                                                                                                                                                                                                                                                                                                                                                                                                               | WallauLab on behalf of Fiocruz COVID-19 Genomic Surveillance Network                                                                                                   | Alexandre Freitas da Silva; Allan Roberto Dias Nunes; Antonio Marinho da Silva Neto; Cassia Docena; Constança Flávia Junqueira Ayres; Filipe Zimmer Dezordi; Gabriel Luz Wallau; Gustavo Barbosa de Lima; Joana Cristina Medeiros Tavares Marques; Katya Anaya Jacinto; Lais Ceschini Machado; Lilian Caroliny Amorim Silva; Marcelo Henrique dos Santos Paiva; Mariane dos Santos Duarte; Matheus Filgueira Bezerra; Sinalv Pinto Brandão Filho                                                                                                                                                                                                                                                                                                                                                                                                                                                                                                                                                                                                                        |
| EPI_ISL_2231644                                                                                                       | AP SSO                                                                                                                                                                                                                                                                                                                                                                                                                                                                                                                                                                                                                                                                                                                                                                           | CSIR-Centre for Cellular and Molecular Biology-INSACOG                                                                                                                 | Amareshwar Vodapalli; Ara Sreenivas; Archana Bharadwaj Siva; B Himasri; Blessy B John; Divya Tej Sowpati; Karthik Bharadwaj Tallapaka; Lamuk Zaveri; Payel Mukherjee; Rakesh K Mishra; Sharath Chandra Thota; Shreekant Verma; Sofia Banu; Tulasi Nagabandi; Valli Nagalakshmi Undamata; Viswagithe S L                                                                                                                                                                                                                                                                                                                                                                                                                                                                                                                                                                                                                                                                                                                                                                 |
| EPI_ISL_3274361                                                                                                       | AREA DE SALUD ACOSTA [ACOSTA/SAN JOSE]                                                                                                                                                                                                                                                                                                                                                                                                                                                                                                                                                                                                                                                                                                                                           | Incienza, Instituto Costarricense de Investigación y Enseñanza en Nutrición y Salud                                                                                    | & Nazareth Ruiz; Adriana Godínez; Caterina Guzmán; Claudio Soto-Garita; Estela Cordero; Francisco Duarte; Hebleen Porras; José Luis Vargas; Mariela Gutiérrez Joselyn Prado; Melany Calderón                                                                                                                                                                                                                                                                                                                                                                                                                                                                                                                                                                                                                                                                                                                                                                                                                                                                            |
| EPI_ISL_3638864                                                                                                       | AREA DE SALUD CORREDORES                                                                                                                                                                                                                                                                                                                                                                                                                                                                                                                                                                                                                                                                                                                                                         | Incienza, Instituto Costarricense de Investigación y Enseñanza en Nutrición y Salud                                                                                    | Adriana Godínez; Claudio Soto-Garita; Estela Cordero; Francisco Duarte; Hebleen Porras; Joselyn Prado & Yendri Ramirez; José Luis Vargas; Mariela Gutiérrez; Melany Calderón                                                                                                                                                                                                                                                                                                                                                                                                                                                                                                                                                                                                                                                                                                                                                                                                                                                                                            |
| EPI_ISL_4601231                                                                                                       | AREA DE SALUD DESAMPARADOS 2 (COOPESALUD)                                                                                                                                                                                                                                                                                                                                                                                                                                                                                                                                                                                                                                                                                                                                        | Incienza, Instituto Costarricense de Investigación y Enseñanza en Nutrición y Salud                                                                                    | Adriana Godínez; Claudio Soto-Garita; Estela Cordero; Francisco Duarte; Hebleen Porras; Joselyn Prado & Juliana Mora Cortes; José Luis Vargas; Mariela Gutiérrez; Melany Calderón                                                                                                                                                                                                                                                                                                                                                                                                                                                                                                                                                                                                                                                                                                                                                                                                                                                                                       |
| EPI_ISL_2828000                                                                                                       | AREA DE SALUD GARABITO                                                                                                                                                                                                                                                                                                                                                                                                                                                                                                                                                                                                                                                                                                                                                           | Incienza, Instituto Costarricense de Investigación y Enseñanza en Nutrición y Salud                                                                                    | Adriana Godínez; Claudio Soto-Garita; Estela Cordero; Francisco Duarte; Hebleen Porras; Joselyn Prado & María José Gómez; José Luis Vargas; Mariela Gutiérrez; Melany Calderón                                                                                                                                                                                                                                                                                                                                                                                                                                                                                                                                                                                                                                                                                                                                                                                                                                                                                          |
| EPI_ISL_6316276                                                                                                       | AREA DE SALUD HEREDIA-CUBUJUQUI - CLINICA DR. FRANCISCO BOLAÑOS                                                                                                                                                                                                                                                                                                                                                                                                                                                                                                                                                                                                                                                                                                                  | Incienza, Instituto Costarricense de Investigación y Enseñanza en Nutrición y Salud                                                                                    | Adriana Godínez; Claudio Soto-Garita; Estela Cordero; Francisco Duarte; Hebleen Porras; José Luis Vargas; Mariela Gutiérrez & Sofia Herrera; Melany Calderón                                                                                                                                                                                                                                                                                                                                                                                                                                                                                                                                                                                                                                                                                                                                                                                                                                                                                                            |
| EPI_ISL_6963562                                                                                                       | AREA DE SALUD HEREDIA-VIRILLA                                                                                                                                                                                                                                                                                                                                                                                                                                                                                                                                                                                                                                                                                                                                                    | Incienza, Instituto Costarricense de Investigación y Enseñanza en Nutrición y Salud                                                                                    | Adriana Godínez; Claudio Soto-Garita; Estela Cordero; Francisco Duarte; Hebleen Porras; José Luis Vargas; Mariela Gutiérrez & Sofia Herrera; Melany Calderón                                                                                                                                                                                                                                                                                                                                                                                                                                                                                                                                                                                                                                                                                                                                                                                                                                                                                                            |
| EPI_ISL_3274349                                                                                                       | AREA DE SALUD MATA REDONDA-HOSPITAL - CLINICA DR. MORENO CAÑAS [SAN JOSE/SAN JOSE]                                                                                                                                                                                                                                                                                                                                                                                                                                                                                                                                                                                                                                                                                               | Incienza, Instituto Costarricense de Investigación y Enseñanza en Nutrición y Salud                                                                                    | Adriana Godínez; Caterina Guzmán; Claudio Soto-Garita; Estela Cordero; Francisco Duarte; Hebleen Porras; Joselyn Prado; José Luis Vargas; Mariela Gutiérrez; Melany Calderón; Nazareth Ruiz & Ricardo González                                                                                                                                                                                                                                                                                                                                                                                                                                                                                                                                                                                                                                                                                                                                                                                                                                                          |
| EPI_ISL_3298340                                                                                                       | AREA DE SALUD PURISCAL-TURRUBARES                                                                                                                                                                                                                                                                                                                                                                                                                                                                                                                                                                                                                                                                                                                                                | Incienza, Instituto Costarricense de Investigación y Enseñanza en Nutrición y Salud                                                                                    | Adriana Godínez; Claudio Soto-Garita; Estela Cordero; Francisco Duarte; Hebleen Porras; José Luis Vargas; Mariela Gutiérrez & Joselyn Prado; Melany Calderón                                                                                                                                                                                                                                                                                                                                                                                                                                                                                                                                                                                                                                                                                                                                                                                                                                                                                                            |
| EPI_ISL_6591494                                                                                                       | AREA DE SALUD TILARAN                                                                                                                                                                                                                                                                                                                                                                                                                                                                                                                                                                                                                                                                                                                                                            | Incienza, Instituto Costarricense de Investigación y Enseñanza en Nutrición y Salud                                                                                    | Adriana Godínez; Claudio Soto-Garita; Estela Cordero; Francisco Duarte; Hebleen Porras; José Luis Vargas; Mariela Gutiérrez; Melany Calderón; Sofia Herrera & Arnoldo Zamora                                                                                                                                                                                                                                                                                                                                                                                                                                                                                                                                                                                                                                                                                                                                                                                                                                                                                            |
| EPI_ISL_3204689                                                                                                       | ARS Alentejo                                                                                                                                                                                                                                                                                                                                                                                                                                                                                                                                                                                                                                                                                                                                                                     | Instituto Nacional de Saude (INSA)                                                                                                                                     | Borges et al                                                                                                                                                                                                                                                                                                                                                                                                                                                                                                                                                                                                                                                                                                                                                                                                                                                                                                                                                                                                                                                            |
| EPI_ISL_418000, EPI_ISL_418004, EPI_ISL_3204453                                                                       | ARS Algarve - Laboratorio Laura Ayres                                                                                                                                                                                                                                                                                                                                                                                                                                                                                                                                                                                                                                                                                                                                            | Instituto Nacional de Saude (INSA)                                                                                                                                     | Borges et al; Guiomar et al                                                                                                                                                                                                                                                                                                                                                                                                                                                                                                                                                                                                                                                                                                                                                                                                                                                                                                                                                                                                                                             |
| EPI_ISL_1096823, EPI_ISL_1229805, EPI_ISL_1557945, EPI_ISL_1558218, EPI_ISL_3235047                                   | ASL Napoli 1 Centro                                                                                                                                                                                                                                                                                                                                                                                                                                                                                                                                                                                                                                                                                                                                                              | AMES Centro Poliagnostico Strumentale S.r.l.                                                                                                                           | "Giovanni Savarese; Antonella Di Carlo; Antonio Fico"; Eloisa Evangelista; Giovanni Savarese; Luigi D'Amore; Luisa Circelli; Maurizio D'Amora; Maurizio D'Amora Antonio Fico; Monica Ianniello; Nadia Petrillo; Raffaella Ruggiero; Roberto Sirica                                                                                                                                                                                                                                                                                                                                                                                                                                                                                                                                                                                                                                                                                                                                                                                                                      |
| EPI_ISL_542116, EPI_ISL_542180                                                                                        | ASST GOM Niguarda                                                                                                                                                                                                                                                                                                                                                                                                                                                                                                                                                                                                                                                                                                                                                                | Dep. Of Oncology and Hemato-Oncology University of Milan                                                                                                               | Antonio Piralla; Carlo Federico Perno; Chiara Vismara; Claudia Alteri; Elisa Matarazzo; Fausto Baldanti; Federica Giardina; Federica Novazzi; Luna Colagrossi; Maria Antonello; Massimo Puoti; Monica Tallarita; Oscar Massimiliano Epis; Roberto Fumagalli; Silvia Renica; Stefano Gaiarsa; Valentino Costabile; Valeria Cento                                                                                                                                                                                                                                                                                                                                                                                                                                                                                                                                                                                                                                                                                                                                         |
| EPI_ISL_1434069                                                                                                       | ASTRALAB LIMOGES                                                                                                                                                                                                                                                                                                                                                                                                                                                                                                                                                                                                                                                                                                                                                                 | CNR Virus des Infections Respiratoires - France SUD                                                                                                                    | Antonin Bal; Bruno Lina; Bruno Simon; Gregory Destras; Gwendolyne Burfin; Hadrien Regue; Laurence Josset; Martine Valette; Quentin Semanas                                                                                                                                                                                                                                                                                                                                                                                                                                                                                                                                                                                                                                                                                                                                                                                                                                                                                                                              |
| EPI_ISL_4659078, EPI_ISL_4659140, EPI_ISL_5421046, EPI_ISL_5933505, EPI_ISL_6569304, EPI_ISL_6569306, EPI_ISL_6569318 | see above                                                                                                                                                                                                                                                                                                                                                                                                                                                                                                                                                                                                                                                                                                                                                                        | AUSTRAL-omics, UACH                                                                                                                                                    | Andrea Silva; Carolina Encina; Cristian Molina; Daniela Plaza; Luis Guzmán; Suany Quesada                                                                                                                                                                                                                                                                                                                                                                                                                                                                                                                                                                                                                                                                                                                                                                                                                                                                                                                                                                               |

|                                                                                                                                                                                                                                                                                                                                                                                                                                                                                                                                                                                                                                                                                                                                                                                                                                                                                                                                                                                                                                                                                                                                                                                                                                                                                                                                                                                                                                                                                                                                                                                                                                                                                                                                                                                                                                                                                                                                                                                                                                                                                                                                                                                                                                                                                                                                                                                                                                                                                                                                                                                                                                                                                                                                                                                                                                                                                                                                                                                                                                                                                                                                                                                                                                                                                                                                                                                                                                                                                                                                                                                                                                                                                                                                                                                                                                                                                                                                                                                                                                                                                                                                                                            |                                                                                           |                                                                                                                                                                                                                                                                                                                                                                                                                                     |                                                                                                                                                                                                                                                                                                                                                                                                                                                                                                                                                                                                                                                                                                                                       |
|----------------------------------------------------------------------------------------------------------------------------------------------------------------------------------------------------------------------------------------------------------------------------------------------------------------------------------------------------------------------------------------------------------------------------------------------------------------------------------------------------------------------------------------------------------------------------------------------------------------------------------------------------------------------------------------------------------------------------------------------------------------------------------------------------------------------------------------------------------------------------------------------------------------------------------------------------------------------------------------------------------------------------------------------------------------------------------------------------------------------------------------------------------------------------------------------------------------------------------------------------------------------------------------------------------------------------------------------------------------------------------------------------------------------------------------------------------------------------------------------------------------------------------------------------------------------------------------------------------------------------------------------------------------------------------------------------------------------------------------------------------------------------------------------------------------------------------------------------------------------------------------------------------------------------------------------------------------------------------------------------------------------------------------------------------------------------------------------------------------------------------------------------------------------------------------------------------------------------------------------------------------------------------------------------------------------------------------------------------------------------------------------------------------------------------------------------------------------------------------------------------------------------------------------------------------------------------------------------------------------------------------------------------------------------------------------------------------------------------------------------------------------------------------------------------------------------------------------------------------------------------------------------------------------------------------------------------------------------------------------------------------------------------------------------------------------------------------------------------------------------------------------------------------------------------------------------------------------------------------------------------------------------------------------------------------------------------------------------------------------------------------------------------------------------------------------------------------------------------------------------------------------------------------------------------------------------------------------------------------------------------------------------------------------------------------------------------------------------------------------------------------------------------------------------------------------------------------------------------------------------------------------------------------------------------------------------------------------------------------------------------------------------------------------------------------------------------------------------------------------------------------------------------------------------|-------------------------------------------------------------------------------------------|-------------------------------------------------------------------------------------------------------------------------------------------------------------------------------------------------------------------------------------------------------------------------------------------------------------------------------------------------------------------------------------------------------------------------------------|---------------------------------------------------------------------------------------------------------------------------------------------------------------------------------------------------------------------------------------------------------------------------------------------------------------------------------------------------------------------------------------------------------------------------------------------------------------------------------------------------------------------------------------------------------------------------------------------------------------------------------------------------------------------------------------------------------------------------------------|
| EPI_ISL_3205820,<br>EPI_ISL_3205862,<br>EPI_ISL_3206030,<br>EPI_ISL_3206036                                                                                                                                                                                                                                                                                                                                                                                                                                                                                                                                                                                                                                                                                                                                                                                                                                                                                                                                                                                                                                                                                                                                                                                                                                                                                                                                                                                                                                                                                                                                                                                                                                                                                                                                                                                                                                                                                                                                                                                                                                                                                                                                                                                                                                                                                                                                                                                                                                                                                                                                                                                                                                                                                                                                                                                                                                                                                                                                                                                                                                                                                                                                                                                                                                                                                                                                                                                                                                                                                                                                                                                                                                                                                                                                                                                                                                                                                                                                                                                                                                                                                                | AX BIO OCEAN                                                                              | CMR Virus des Infections Respiratoires - France SUD                                                                                                                                                                                                                                                                                                                                                                                 | Antonin Bal; Bruno Lina; Gregory Destras; Gwendolynne Burfin; Hadrien Regue; Laurence Josset; Martine Valette; Quentin Semanas                                                                                                                                                                                                                                                                                                                                                                                                                                                                                                                                                                                                        |
| EPI_ISL_1403621,<br>EPI_ISL_1601807,<br>EPI_ISL_1824638                                                                                                                                                                                                                                                                                                                                                                                                                                                                                                                                                                                                                                                                                                                                                                                                                                                                                                                                                                                                                                                                                                                                                                                                                                                                                                                                                                                                                                                                                                                                                                                                                                                                                                                                                                                                                                                                                                                                                                                                                                                                                                                                                                                                                                                                                                                                                                                                                                                                                                                                                                                                                                                                                                                                                                                                                                                                                                                                                                                                                                                                                                                                                                                                                                                                                                                                                                                                                                                                                                                                                                                                                                                                                                                                                                                                                                                                                                                                                                                                                                                                                                                    | AZ Klina                                                                                  | AZ Klina                                                                                                                                                                                                                                                                                                                                                                                                                            | Carl Vael - Lynsey Berckmans                                                                                                                                                                                                                                                                                                                                                                                                                                                                                                                                                                                                                                                                                                          |
| EPI_ISL_1972117<br>EPI_ISL_3690027                                                                                                                                                                                                                                                                                                                                                                                                                                                                                                                                                                                                                                                                                                                                                                                                                                                                                                                                                                                                                                                                                                                                                                                                                                                                                                                                                                                                                                                                                                                                                                                                                                                                                                                                                                                                                                                                                                                                                                                                                                                                                                                                                                                                                                                                                                                                                                                                                                                                                                                                                                                                                                                                                                                                                                                                                                                                                                                                                                                                                                                                                                                                                                                                                                                                                                                                                                                                                                                                                                                                                                                                                                                                                                                                                                                                                                                                                                                                                                                                                                                                                                                                         | AZ St-Jan Brugge-Oostende                                                                 | AZ SINT-JAN BRUGGE                                                                                                                                                                                                                                                                                                                                                                                                                  | Jorn Hellemans; Laurien Hoornaert; Marijke Reynders; Patrick Descheemaeker; Thomas Van Landschoot                                                                                                                                                                                                                                                                                                                                                                                                                                                                                                                                                                                                                                     |
| EPI_ISL_4303393,<br>EPI_ISL_4303398                                                                                                                                                                                                                                                                                                                                                                                                                                                                                                                                                                                                                                                                                                                                                                                                                                                                                                                                                                                                                                                                                                                                                                                                                                                                                                                                                                                                                                                                                                                                                                                                                                                                                                                                                                                                                                                                                                                                                                                                                                                                                                                                                                                                                                                                                                                                                                                                                                                                                                                                                                                                                                                                                                                                                                                                                                                                                                                                                                                                                                                                                                                                                                                                                                                                                                                                                                                                                                                                                                                                                                                                                                                                                                                                                                                                                                                                                                                                                                                                                                                                                                                                        | AZ St-Jan Brugge-Oostende                                                                 | AZ Sint Jan                                                                                                                                                                                                                                                                                                                                                                                                                         | Jorn Hellemans; Laurien Hoornaert; Marie Madeleine Chabert-Consen; Marijke Reynders; Patrick Descheemaeker; Thomas Van Landschoot                                                                                                                                                                                                                                                                                                                                                                                                                                                                                                                                                                                                     |
| EPI_ISL_3241850                                                                                                                                                                                                                                                                                                                                                                                                                                                                                                                                                                                                                                                                                                                                                                                                                                                                                                                                                                                                                                                                                                                                                                                                                                                                                                                                                                                                                                                                                                                                                                                                                                                                                                                                                                                                                                                                                                                                                                                                                                                                                                                                                                                                                                                                                                                                                                                                                                                                                                                                                                                                                                                                                                                                                                                                                                                                                                                                                                                                                                                                                                                                                                                                                                                                                                                                                                                                                                                                                                                                                                                                                                                                                                                                                                                                                                                                                                                                                                                                                                                                                                                                                            | AZDelta                                                                                   | AZ Delta Medical Laboratories in Roeselare, Belgium                                                                                                                                                                                                                                                                                                                                                                                 | Dieter De Smet; Frederik Van Hoecke; Geert Martens; on behalf of AZ Delta COVID-19 Genomics core (member of Genomic surveillance of SARS-CoV-2 in Belgium network)                                                                                                                                                                                                                                                                                                                                                                                                                                                                                                                                                                    |
| EPI_ISL_954775                                                                                                                                                                                                                                                                                                                                                                                                                                                                                                                                                                                                                                                                                                                                                                                                                                                                                                                                                                                                                                                                                                                                                                                                                                                                                                                                                                                                                                                                                                                                                                                                                                                                                                                                                                                                                                                                                                                                                                                                                                                                                                                                                                                                                                                                                                                                                                                                                                                                                                                                                                                                                                                                                                                                                                                                                                                                                                                                                                                                                                                                                                                                                                                                                                                                                                                                                                                                                                                                                                                                                                                                                                                                                                                                                                                                                                                                                                                                                                                                                                                                                                                                                             | AZDelta                                                                                   | AZDelta                                                                                                                                                                                                                                                                                                                                                                                                                             | Dieter De Smet; Geert Martens                                                                                                                                                                                                                                                                                                                                                                                                                                                                                                                                                                                                                                                                                                         |
| EPI_ISL_1445428, EPI_ISL_1445506, EPI_ISL_1445539, EPI_ISL_1445833, EPI_ISL_1479649, EPI_ISL_1550868, EPI_ISL_1551087, EPI_ISL_1551089, EPI_ISL_1551230, EPI_ISL_1551254, EPI_ISL_1551257, EPI_ISL_1551474, EPI_ISL_1551552, EPI_ISL_1559802, EPI_ISL_1559810, EPI_ISL_1559842, EPI_ISL_1559933, EPI_ISL_1560068, EPI_ISL_1560114, EPI_ISL_1560484, EPI_ISL_1561624, EPI_ISL_1561708, EPI_ISL_1561920, EPI_ISL_1561943, EPI_ISL_1562070, EPI_ISL_1562171, EPI_ISL_1562282, EPI_ISL_1562322, EPI_ISL_1562956, EPI_ISL_1563117, EPI_ISL_1563596, EPI_ISL_1649018, EPI_ISL_1649056, EPI_ISL_1649092, EPI_ISL_1649095, EPI_ISL_1649203, EPI_ISL_1649304, EPI_ISL_1649385, EPI_ISL_1649397, EPI_ISL_1649402, EPI_ISL_1649421, EPI_ISL_1649574, EPI_ISL_1649575, EPI_ISL_1649912, EPI_ISL_1649914, EPI_ISL_1650075, EPI_ISL_1650113, EPI_ISL_1650248, EPI_ISL_1650432, EPI_ISL_1650508, EPI_ISL_1650611, EPI_ISL_1650628, EPI_ISL_1650931, EPI_ISL_1651175, EPI_ISL_1667559, EPI_ISL_1667674, EPI_ISL_1667770, EPI_ISL_1668084, EPI_ISL_1668133, EPI_ISL_1668170, EPI_ISL_1685638, EPI_ISL_1685642, EPI_ISL_1685962, EPI_ISL_1686469, EPI_ISL_1686622, EPI_ISL_1686624, EPI_ISL_1686772, EPI_ISL_1687047, EPI_ISL_1687070, EPI_ISL_1688202, EPI_ISL_1687271, EPI_ISL_1688288, EPI_ISL_1688413, EPI_ISL_1688462, EPI_ISL_1689786, EPI_ISL_1689851, EPI_ISL_1690065, EPI_ISL_1690674, EPI_ISL_1693379, EPI_ISL_1702725, EPI_ISL_1702740, EPI_ISL_1702773, EPI_ISL_1735992, EPI_ISL_1736588, EPI_ISL_1737124, EPI_ISL_1737189, EPI_ISL_1834590, EPI_ISL_1834660, EPI_ISL_1834726, EPI_ISL_1834748, EPI_ISL_1834859, EPI_ISL_1834910, EPI_ISL_1835067, EPI_ISL_1835118, EPI_ISL_1835250, EPI_ISL_1835595, EPI_ISL_1835695, EPI_ISL_1836370, EPI_ISL_1836440, EPI_ISL_1836456, EPI_ISL_1836647, EPI_ISL_1836868, EPI_ISL_1837050, EPI_ISL_1837109, EPI_ISL_1837384, EPI_ISL_1837632, EPI_ISL_1922937, EPI_ISL_1925328, EPI_ISL_1995500, EPI_ISL_1995509, EPI_ISL_1995998, EPI_ISL_1996413, EPI_ISL_1996641, EPI_ISL_1996627, EPI_ISL_1998436, EPI_ISL_1999276, EPI_ISL_1999656, EPI_ISL_1999117, EPI_ISL_1999298, EPI_ISL_1999981, EPI_ISL_2000180, EPI_ISL_2000242, EPI_ISL_2039382, EPI_ISL_2039995, EPI_ISL_2040266, EPI_ISL_2040433, EPI_ISL_2041155, EPI_ISL_2041579, EPI_ISL_2041611, EPI_ISL_2041866, EPI_ISL_2043504, EPI_ISL_2089895, EPI_ISL_2090383, EPI_ISL_2146693, EPI_ISL_2146694, EPI_ISL_2146397, EPI_ISL_2147114, EPI_ISL_2147238, EPI_ISL_2147728, EPI_ISL_2148015, EPI_ISL_2148328, EPI_ISL_2148673, EPI_ISL_2148695, EPI_ISL_2150857, EPI_ISL_2159032, EPI_ISL_2159191, EPI_ISL_2180557, EPI_ISL_2180715, EPI_ISL_2180913, EPI_ISL_2180974, EPI_ISL_2185786, EPI_ISL_2186119, EPI_ISL_2201801, EPI_ISL_2201830, EPI_ISL_2202554, EPI_ISL_2421301, EPI_ISL_2421335, EPI_ISL_2421347, EPI_ISL_2421854, EPI_ISL_2421880, EPI_ISL_2421965, EPI_ISL_3217277, EPI_ISL_3217308, EPI_ISL_3217379, EPI_ISL_3217449, EPI_ISL_3217469, EPI_ISL_3217557, EPI_ISL_3217593, EPI_ISL_3217650, EPI_ISL_3217677, EPI_ISL_3217736, EPI_ISL_3217913, EPI_ISL_3217969, EPI_ISL_3217989, EPI_ISL_3217989, EPI_ISL_3218007, EPI_ISL_3218032, EPI_ISL_3218032, EPI_ISL_3218122, EPI_ISL_3218129, EPI_ISL_3218148, EPI_ISL_3218306, EPI_ISL_3218411, EPI_ISL_3218478, EPI_ISL_3218487, EPI_ISL_3218491, EPI_ISL_3218505, EPI_ISL_3218559, EPI_ISL_3218599, EPI_ISL_3218610, EPI_ISL_3218635, EPI_ISL_3218636, EPI_ISL_3218638, EPI_ISL_3218713, EPI_ISL_3218766, EPI_ISL_3218781, EPI_ISL_3219927, EPI_ISL_3219940, EPI_ISL_3219977, EPI_ISL_3220024, EPI_ISL_3220132, EPI_ISL_3220201, EPI_ISL_3220232, EPI_ISL_3220261, EPI_ISL_3220338, EPI_ISL_3220398, EPI_ISL_3220418, EPI_ISL_3220429, EPI_ISL_3220431, EPI_ISL_3220440, EPI_ISL_3220481, EPI_ISL_3220519, EPI_ISL_3220524, EPI_ISL_3220531, EPI_ISL_3220537, EPI_ISL_3220545, EPI_ISL_3220573, EPI_ISL_3220580, EPI_ISL_3220641, EPI_ISL_3220689, EPI_ISL_3220700, EPI_ISL_3220702, EPI_ISL_3220706, EPI_ISL_3220739, EPI_ISL_3220751, EPI_ISL_3220768, EPI_ISL_3220778, EPI_ISL_3220794, EPI_ISL_3220863, EPI_ISL_3220904, EPI_ISL_3220911, EPI_ISL_3220949, EPI_ISL_3220974, EPI_ISL_3220980, EPI_ISL_3220986, EPI_ISL_3221043 | Centers for Disease Control and Prevention Division of Viral Diseases, Pathogen Discovery | Adrian Paskey; Alec Vest; Benjamin Rambo-Martin; Christopher Gulvick; Clinton R. Paden; Cyndi Clark; Dakota Howard; Darlene Wagner; Dhvani Batra; Dillon Nall; Duncan MacCannell; Ethan Sanders; Holly Houdeshell; Jason Caravas; Kara Moser; Matthew Hardison; Matthew Schmeier; Ola Kvalvaag; Patrick Campbell; Peter W. Cook; Rob Case; Scott Sammons; Shatavia Morrison; Shaun Westlund; Vikramsinha Ghorpade; Yvette Unoarumhi |                                                                                                                                                                                                                                                                                                                                                                                                                                                                                                                                                                                                                                                                                                                                       |
| EPI_ISL_3217415                                                                                                                                                                                                                                                                                                                                                                                                                                                                                                                                                                                                                                                                                                                                                                                                                                                                                                                                                                                                                                                                                                                                                                                                                                                                                                                                                                                                                                                                                                                                                                                                                                                                                                                                                                                                                                                                                                                                                                                                                                                                                                                                                                                                                                                                                                                                                                                                                                                                                                                                                                                                                                                                                                                                                                                                                                                                                                                                                                                                                                                                                                                                                                                                                                                                                                                                                                                                                                                                                                                                                                                                                                                                                                                                                                                                                                                                                                                                                                                                                                                                                                                                                            | Airport Health Laboratory/Central Health Laboratory                                       | Virology Department, Central Health Laboratory, Victoria Hospital, Candos, Ministry of Health and Wellness, Mauritius                                                                                                                                                                                                                                                                                                               | Bahadour BS; Jannoo N; Manraj SS; Mathur H; Pattoo M; Ramuth M; Sonoo J; Sujewon C                                                                                                                                                                                                                                                                                                                                                                                                                                                                                                                                                                                                                                                    |
| EPI_ISL_1186146,<br>EPI_ISL_1254616,<br>EPI_ISL_1323164,<br>EPI_ISL_1547541,<br>EPI_ISL_1547584,<br>EPI_ISL_3229852                                                                                                                                                                                                                                                                                                                                                                                                                                                                                                                                                                                                                                                                                                                                                                                                                                                                                                                                                                                                                                                                                                                                                                                                                                                                                                                                                                                                                                                                                                                                                                                                                                                                                                                                                                                                                                                                                                                                                                                                                                                                                                                                                                                                                                                                                                                                                                                                                                                                                                                                                                                                                                                                                                                                                                                                                                                                                                                                                                                                                                                                                                                                                                                                                                                                                                                                                                                                                                                                                                                                                                                                                                                                                                                                                                                                                                                                                                                                                                                                                                                        | Akershus University Hospital, Department of Microbiology and Infectious Disease Control   | Norwegian Institute of Public Health, Department of Virology                                                                                                                                                                                                                                                                                                                                                                        | Atiya R Ali; Debech Nadia; Engbretsen Serina Beate; Garcia Lorente Ignacio; Hilde Elshaug; Hilde Volland; Jon Bråte; Kamilla Heddeland Inestjord; Karoline Bragstad; Kathrine Stene-Johansen; Line Victoria Moen; Marie Paulsen Madsen; Olav Hungnes; Pedersen Benedikte Hedden; Rasmus Riis Kopperud                                                                                                                                                                                                                                                                                                                                                                                                                                 |
| EPI_ISL_1575122                                                                                                                                                                                                                                                                                                                                                                                                                                                                                                                                                                                                                                                                                                                                                                                                                                                                                                                                                                                                                                                                                                                                                                                                                                                                                                                                                                                                                                                                                                                                                                                                                                                                                                                                                                                                                                                                                                                                                                                                                                                                                                                                                                                                                                                                                                                                                                                                                                                                                                                                                                                                                                                                                                                                                                                                                                                                                                                                                                                                                                                                                                                                                                                                                                                                                                                                                                                                                                                                                                                                                                                                                                                                                                                                                                                                                                                                                                                                                                                                                                                                                                                                                            | Alameda County Public Health Department                                                   | Alameda County Public Health Department                                                                                                                                                                                                                                                                                                                                                                                             | Kevin Libuit; Kristna Hsieh; Maria Elma                                                                                                                                                                                                                                                                                                                                                                                                                                                                                                                                                                                                                                                                                               |
| EPI_ISL_1182786, EPI_ISL_1675128, EPI_ISL_1754881, EPI_ISL_2101777, EPI_ISL_2136750, EPI_ISL_3270481, EPI_ISL_3270488                                                                                                                                                                                                                                                                                                                                                                                                                                                                                                                                                                                                                                                                                                                                                                                                                                                                                                                                                                                                                                                                                                                                                                                                                                                                                                                                                                                                                                                                                                                                                                                                                                                                                                                                                                                                                                                                                                                                                                                                                                                                                                                                                                                                                                                                                                                                                                                                                                                                                                                                                                                                                                                                                                                                                                                                                                                                                                                                                                                                                                                                                                                                                                                                                                                                                                                                                                                                                                                                                                                                                                                                                                                                                                                                                                                                                                                                                                                                                                                                                                                      | Alaska State Virology Laboratory                                                          | Alaska State Virology Laboratory                                                                                                                                                                                                                                                                                                                                                                                                    | Elva House; Jack Chen; Jacob Zidek; Lisa Smith; Ph.D.; Stephanie DeRonde                                                                                                                                                                                                                                                                                                                                                                                                                                                                                                                                                                                                                                                              |
| EPI_ISL_2162988, EPI_ISL_2163075, EPI_ISL_2163603, EPI_ISL_2165119, EPI_ISL_2167395, EPI_ISL_2168158, EPI_ISL_2169298, EPI_ISL_2169300, EPI_ISL_2170252                                                                                                                                                                                                                                                                                                                                                                                                                                                                                                                                                                                                                                                                                                                                                                                                                                                                                                                                                                                                                                                                                                                                                                                                                                                                                                                                                                                                                                                                                                                                                                                                                                                                                                                                                                                                                                                                                                                                                                                                                                                                                                                                                                                                                                                                                                                                                                                                                                                                                                                                                                                                                                                                                                                                                                                                                                                                                                                                                                                                                                                                                                                                                                                                                                                                                                                                                                                                                                                                                                                                                                                                                                                                                                                                                                                                                                                                                                                                                                                                                    | Alberta Precision Labs (APL)                                                              | Public Health Agency of Canada (PHAC) National Microbiology Laboratory                                                                                                                                                                                                                                                                                                                                                              | Buss; Croxen M; Deo A; Dieu P; E; Ferrato C; Gill K; Khan F; Koleva P; Li V; Lloyd C; Lynch T; Ma R; Murphy S; Pabbaraju K; Shokoples S; Thayer J; Tipples G; Whitehouse M; Wong A; Yu C; Zelyas N                                                                                                                                                                                                                                                                                                                                                                                                                                                                                                                                    |
| EPI_ISL_2502647,<br>EPI_ISL_2502663                                                                                                                                                                                                                                                                                                                                                                                                                                                                                                                                                                                                                                                                                                                                                                                                                                                                                                                                                                                                                                                                                                                                                                                                                                                                                                                                                                                                                                                                                                                                                                                                                                                                                                                                                                                                                                                                                                                                                                                                                                                                                                                                                                                                                                                                                                                                                                                                                                                                                                                                                                                                                                                                                                                                                                                                                                                                                                                                                                                                                                                                                                                                                                                                                                                                                                                                                                                                                                                                                                                                                                                                                                                                                                                                                                                                                                                                                                                                                                                                                                                                                                                                        | All India Institute of Medical Sciences Delhi Hospital                                    | Virology Laboratory, AIIMS Delhi                                                                                                                                                                                                                                                                                                                                                                                                    | Aashish Choudhary; Chitra Sarkar; Deepankar Srigyan; Dibyabhava Pradhan; Jyoti Jethani; Lalit Dar; Lata Rani; Manish Soneja; Megha Brijwal; Nazneen Arif; Pooja Pandey; Puneet Kaur; Rakesh Lodha; Randeep Guleria; Ritu Gupta; Shivram Dhakad; Subrata Sinha; Sumedha Bagga                                                                                                                                                                                                                                                                                                                                                                                                                                                          |
| EPI_ISL_3275482,<br>EPI_ISL_3275486                                                                                                                                                                                                                                                                                                                                                                                                                                                                                                                                                                                                                                                                                                                                                                                                                                                                                                                                                                                                                                                                                                                                                                                                                                                                                                                                                                                                                                                                                                                                                                                                                                                                                                                                                                                                                                                                                                                                                                                                                                                                                                                                                                                                                                                                                                                                                                                                                                                                                                                                                                                                                                                                                                                                                                                                                                                                                                                                                                                                                                                                                                                                                                                                                                                                                                                                                                                                                                                                                                                                                                                                                                                                                                                                                                                                                                                                                                                                                                                                                                                                                                                                        | Allergy, Immunology and Cell Biology Unit (AICBU)                                         | Allergy, Immunology and Cell Biology Unit (AICBU)                                                                                                                                                                                                                                                                                                                                                                                   | Ayesha Wijesinghe; Chandima Jeewandara; Deshni Jayathilaka; Dinuka Ariyaratne; Dyananth Ransasinghe; Dummi Gunasinghe; Gathsaurie Neelika Malavige; Tibutius Thanes                                                                                                                                                                                                                                                                                                                                                                                                                                                                                                                                                                   |
| EPI_ISL_2156552                                                                                                                                                                                                                                                                                                                                                                                                                                                                                                                                                                                                                                                                                                                                                                                                                                                                                                                                                                                                                                                                                                                                                                                                                                                                                                                                                                                                                                                                                                                                                                                                                                                                                                                                                                                                                                                                                                                                                                                                                                                                                                                                                                                                                                                                                                                                                                                                                                                                                                                                                                                                                                                                                                                                                                                                                                                                                                                                                                                                                                                                                                                                                                                                                                                                                                                                                                                                                                                                                                                                                                                                                                                                                                                                                                                                                                                                                                                                                                                                                                                                                                                                                            | Amosup Seamen's Hospital                                                                  | Philippine Genome Center                                                                                                                                                                                                                                                                                                                                                                                                            | Alethea R. de Guzman; Anna Ong-Lim; Arianne A. Zamora; Asia Louisa U. Chong; Benedict A. Maralit; Candice Francheska B. Tambaoan; Carlo M. Lapid; Celia Carlos; Devon Ray Pacial; Edsel Maurice Salvaña; El King D. Morado; Elcid Aaron R. Panglinan; Eva Maria Cutiungco-de la Paz; Francis A. Tablizo; Irish Coleen A. Asin; Jaime C. Montoya; Jan Michael C. Yap; Jo-Hannah S. Llamas; John Q. Wong; Joshua Gregor A. Dizon; Juan Antonio R. Magalang; Karol Sophia Agape R. Padilla; Kenneth M. Kim; Kris P. Punayan; Marc Edsel C. Ayes; Marc jerrone R. Castro; Maria Rosario Singh-Vergere and Cynthia P. Saloma; Maria Sofia L. Yangzon; Marissa Alejandria; Razel Nikka M. Hao; Rianna Patricia S. Cruz; Sheila Mae M. Araza |
| EPI_ISL_3207520                                                                                                                                                                                                                                                                                                                                                                                                                                                                                                                                                                                                                                                                                                                                                                                                                                                                                                                                                                                                                                                                                                                                                                                                                                                                                                                                                                                                                                                                                                                                                                                                                                                                                                                                                                                                                                                                                                                                                                                                                                                                                                                                                                                                                                                                                                                                                                                                                                                                                                                                                                                                                                                                                                                                                                                                                                                                                                                                                                                                                                                                                                                                                                                                                                                                                                                                                                                                                                                                                                                                                                                                                                                                                                                                                                                                                                                                                                                                                                                                                                                                                                                                                            | Ampath lab                                                                                | NHL/UCT                                                                                                                                                                                                                                                                                                                                                                                                                             | Arash Iranzadeh; Bruna Galvaio; Carolyn Williamson; Deelan Doolabh; Diana Hardie; Gert Marais; Innocent Mudau; Lynn Tyers; Marvin Hsiao; Rageema Joseph; Stephen Korsman                                                                                                                                                                                                                                                                                                                                                                                                                                                                                                                                                              |
| EPI_ISL_414648                                                                                                                                                                                                                                                                                                                                                                                                                                                                                                                                                                                                                                                                                                                                                                                                                                                                                                                                                                                                                                                                                                                                                                                                                                                                                                                                                                                                                                                                                                                                                                                                                                                                                                                                                                                                                                                                                                                                                                                                                                                                                                                                                                                                                                                                                                                                                                                                                                                                                                                                                                                                                                                                                                                                                                                                                                                                                                                                                                                                                                                                                                                                                                                                                                                                                                                                                                                                                                                                                                                                                                                                                                                                                                                                                                                                                                                                                                                                                                                                                                                                                                                                                             | Andersen Lab, The Scripps Research Institute                                              | Andersen Lab, The Scripps Research Institute                                                                                                                                                                                                                                                                                                                                                                                        | Catie Anderson; Emily Spender; Karthik Gangavarapu; Kristian Andersen; Laura Nicholas; Mark Zeller; Raphaelle Klitting; Refugio Robles-Sikisaka; Sarah Topol                                                                                                                                                                                                                                                                                                                                                                                                                                                                                                                                                                          |
| EPI_ISL_3243020,<br>EPI_ISL_3243026                                                                                                                                                                                                                                                                                                                                                                                                                                                                                                                                                                                                                                                                                                                                                                                                                                                                                                                                                                                                                                                                                                                                                                                                                                                                                                                                                                                                                                                                                                                                                                                                                                                                                                                                                                                                                                                                                                                                                                                                                                                                                                                                                                                                                                                                                                                                                                                                                                                                                                                                                                                                                                                                                                                                                                                                                                                                                                                                                                                                                                                                                                                                                                                                                                                                                                                                                                                                                                                                                                                                                                                                                                                                                                                                                                                                                                                                                                                                                                                                                                                                                                                                        | Applied DNA Sciences Inc                                                                  | Applied DNA Sciences Inc                                                                                                                                                                                                                                                                                                                                                                                                            | Huan Dong; Lucas Liu; Spencer William; Yuhua Sun                                                                                                                                                                                                                                                                                                                                                                                                                                                                                                                                                                                                                                                                                      |
| EPI_ISL_3261159,<br>EPI_ISL_3261160                                                                                                                                                                                                                                                                                                                                                                                                                                                                                                                                                                                                                                                                                                                                                                                                                                                                                                                                                                                                                                                                                                                                                                                                                                                                                                                                                                                                                                                                                                                                                                                                                                                                                                                                                                                                                                                                                                                                                                                                                                                                                                                                                                                                                                                                                                                                                                                                                                                                                                                                                                                                                                                                                                                                                                                                                                                                                                                                                                                                                                                                                                                                                                                                                                                                                                                                                                                                                                                                                                                                                                                                                                                                                                                                                                                                                                                                                                                                                                                                                                                                                                                                        | Arcispedale Santa Maria Nuova, Autoimmunità, Allergologia e Biotecnologie Innovative      | Istituto Zooprofilattico Sperimentale della Lombardia e dell'Emilia Romagna (IZSLER), Risk Analysis and Genomic Epidemiology Unit                                                                                                                                                                                                                                                                                                   | Alessandro Zerbinì; Erika Scaltriti; Ilaria Menozzi; Lucia Belloni; Marina Morganti; Stefania Croci; Stefano Pongolini                                                                                                                                                                                                                                                                                                                                                                                                                                                                                                                                                                                                                |
| EPI_ISL_1239077, EPI_ISL_1306115, EPI_ISL_2135831, EPI_ISL_2135984, EPI_ISL_3217099, EPI_ISL_3217101, EPI_ISL_3217111, EPI_ISL_3217120, EPI_ISL_3217123, EPI_ISL_3217136                                                                                                                                                                                                                                                                                                                                                                                                                                                                                                                                                                                                                                                                                                                                                                                                                                                                                                                                                                                                                                                                                                                                                                                                                                                                                                                                                                                                                                                                                                                                                                                                                                                                                                                                                                                                                                                                                                                                                                                                                                                                                                                                                                                                                                                                                                                                                                                                                                                                                                                                                                                                                                                                                                                                                                                                                                                                                                                                                                                                                                                                                                                                                                                                                                                                                                                                                                                                                                                                                                                                                                                                                                                                                                                                                                                                                                                                                                                                                                                                   | Arizona State Public Health Laboratory                                                    | Arizona State Public Health Laboratory                                                                                                                                                                                                                                                                                                                                                                                              | Jessica Escobar; Katherine Fullerton; Linda Getsinger; Matthew Contursi; Nobuko Fukushima; Stacy White; Trung Huynh; Victor Waddell                                                                                                                                                                                                                                                                                                                                                                                                                                                                                                                                                                                                   |
| EPI_ISL_1365594, EPI_ISL_1592329, EPI_ISL_1592392, EPI_ISL_1743684, EPI_ISL_1757945, EPI_ISL_1758032, EPI_ISL_3255512, EPI_ISL_3255535, EPI_ISL_3255536, EPI_ISL_3255539, EPI_ISL_3255543                                                                                                                                                                                                                                                                                                                                                                                                                                                                                                                                                                                                                                                                                                                                                                                                                                                                                                                                                                                                                                                                                                                                                                                                                                                                                                                                                                                                                                                                                                                                                                                                                                                                                                                                                                                                                                                                                                                                                                                                                                                                                                                                                                                                                                                                                                                                                                                                                                                                                                                                                                                                                                                                                                                                                                                                                                                                                                                                                                                                                                                                                                                                                                                                                                                                                                                                                                                                                                                                                                                                                                                                                                                                                                                                                                                                                                                                                                                                                                                  | Arizona State University                                                                  | Arizona State University                                                                                                                                                                                                                                                                                                                                                                                                            | Ajeet Bains; Efrem S. Lim; Emily A. Kaelin; Joshua LaBaer; Joy M. Blain; Kristina Buss; LaRinda A. Holland; Matthew F. Smith; Nathaniel Johnson; Neal W Woodbury; Nicholas J. Mellor; Peter T. Skidmore; Rabia Maqsood; Valerie Harris; Vel Murugan                                                                                                                                                                                                                                                                                                                                                                                                                                                                                   |
| EPI_ISL_3274170,<br>EPI_ISL_3274171,<br>EPI_ISL_3274174,<br>EPI_ISL_3274176,<br>EPI_ISL_3274177                                                                                                                                                                                                                                                                                                                                                                                                                                                                                                                                                                                                                                                                                                                                                                                                                                                                                                                                                                                                                                                                                                                                                                                                                                                                                                                                                                                                                                                                                                                                                                                                                                                                                                                                                                                                                                                                                                                                                                                                                                                                                                                                                                                                                                                                                                                                                                                                                                                                                                                                                                                                                                                                                                                                                                                                                                                                                                                                                                                                                                                                                                                                                                                                                                                                                                                                                                                                                                                                                                                                                                                                                                                                                                                                                                                                                                                                                                                                                                                                                                                                            | Arkansas Children's Hospital                                                              | Center for Global Health, University of New Mexico Health Sciences Center                                                                                                                                                                                                                                                                                                                                                           | Amanda Novack; Darrell Dinwiddie; Daryl Domman; Dirk Haselow; Joshua L. Kennedy; Kurt Schwalm; Valerie Morley                                                                                                                                                                                                                                                                                                                                                                                                                                                                                                                                                                                                                         |
| EPI_ISL_3256335,<br>EPI_ISL_3256360,<br>EPI_ISL_3256375,<br>EPI_ISL_3256400,<br>EPI_ISL_3256407                                                                                                                                                                                                                                                                                                                                                                                                                                                                                                                                                                                                                                                                                                                                                                                                                                                                                                                                                                                                                                                                                                                                                                                                                                                                                                                                                                                                                                                                                                                                                                                                                                                                                                                                                                                                                                                                                                                                                                                                                                                                                                                                                                                                                                                                                                                                                                                                                                                                                                                                                                                                                                                                                                                                                                                                                                                                                                                                                                                                                                                                                                                                                                                                                                                                                                                                                                                                                                                                                                                                                                                                                                                                                                                                                                                                                                                                                                                                                                                                                                                                            | Arkansas Public Health Laboratory, Arkansas Department of Health                          | University of Minnesota Genomics Center                                                                                                                                                                                                                                                                                                                                                                                             | Corbin Dirk; Daryl M. Gohl; Jaquelyn Kuriger-Laber; John Garbe                                                                                                                                                                                                                                                                                                                                                                                                                                                                                                                                                                                                                                                                        |
| EPI_ISL_2791025                                                                                                                                                                                                                                                                                                                                                                                                                                                                                                                                                                                                                                                                                                                                                                                                                                                                                                                                                                                                                                                                                                                                                                                                                                                                                                                                                                                                                                                                                                                                                                                                                                                                                                                                                                                                                                                                                                                                                                                                                                                                                                                                                                                                                                                                                                                                                                                                                                                                                                                                                                                                                                                                                                                                                                                                                                                                                                                                                                                                                                                                                                                                                                                                                                                                                                                                                                                                                                                                                                                                                                                                                                                                                                                                                                                                                                                                                                                                                                                                                                                                                                                                                            | Armies                                                                                    | National Reference Center for Viruses of Respiratory Infections, Institut Pasteur Paris                                                                                                                                                                                                                                                                                                                                             | Angela Brisebarre; Camille Capel; Christine Bigaillon; Christophe Malabat; Corinne Maufrais; Emmanuelle Permal; Etienne Simon-Lorière; Frédéric Lemoine; Louise Lefrançois; Marion Barbet; Maud Vanpeene; Méline Bizard; Sylvie Behilli; Sylvie Van der Werf; Vincent Enouf                                                                                                                                                                                                                                                                                                                                                                                                                                                           |
| EPI_ISL_2423529                                                                                                                                                                                                                                                                                                                                                                                                                                                                                                                                                                                                                                                                                                                                                                                                                                                                                                                                                                                                                                                                                                                                                                                                                                                                                                                                                                                                                                                                                                                                                                                                                                                                                                                                                                                                                                                                                                                                                                                                                                                                                                                                                                                                                                                                                                                                                                                                                                                                                                                                                                                                                                                                                                                                                                                                                                                                                                                                                                                                                                                                                                                                                                                                                                                                                                                                                                                                                                                                                                                                                                                                                                                                                                                                                                                                                                                                                                                                                                                                                                                                                                                                                            | Atlanta VA Medical Center                                                                 | Genomics and Discovery, Respiratory Viruses Branch, Division of Viral Diseases, Centers for Disease Control and Prevention                                                                                                                                                                                                                                                                                                          | Adam Retchless; Anna Kelleher; Anna Uehara; Brian Lynch; Clinton R. Paden; Dhvani Batra; Haibin Wang; Han Jia Justin Ng; Jasmine Padilla; Jing Zhang; Justin Lee; Krista Queen; Mark Burroughs; Mill Sheth; Morgan Davis; Peter Cook; Rachel Marine; Sarah Nobles; Xiang Tong; Tara Coalter; Yan Li; Ying Tao                                                                                                                                                                                                                                                                                                                                                                                                                         |
| EPI_ISL_3185154                                                                                                                                                                                                                                                                                                                                                                                                                                                                                                                                                                                                                                                                                                                                                                                                                                                                                                                                                                                                                                                                                                                                                                                                                                                                                                                                                                                                                                                                                                                                                                                                                                                                                                                                                                                                                                                                                                                                                                                                                                                                                                                                                                                                                                                                                                                                                                                                                                                                                                                                                                                                                                                                                                                                                                                                                                                                                                                                                                                                                                                                                                                                                                                                                                                                                                                                                                                                                                                                                                                                                                                                                                                                                                                                                                                                                                                                                                                                                                                                                                                                                                                                                            | Australian Clinical Labs (formerly Healthscope Pathology)                                 | NSW Health Pathology - Institute of Clinical Pathology and Medical Research; Westmead Hospital; University of Sydney                                                                                                                                                                                                                                                                                                                | CIDM-PH et al.                                                                                                                                                                                                                                                                                                                                                                                                                                                                                                                                                                                                                                                                                                                        |
| EPI_ISL_1008191, EPI_ISL_1180754, EPI_ISL_1180778, EPI_ISL_1671043, EPI_ISL_1840937, EPI_ISL_1840940, EPI_ISL_1840960, EPI_ISL_2232765, EPI_ISL_2232848, EPI_ISL_2232887, EPI_ISL_2324317, EPI_ISL_2427105, EPI_ISL_2485007, EPI_ISL_2485100, EPI_ISL_2485116, EPI_ISL_2616317, EPI_ISL_2617633, EPI_ISL_2657464, EPI_ISL_2887519, EPI_ISL_2887609, EPI_ISL_2985445, EPI_ISL_2985545, EPI_ISL_3231003, EPI_ISL_3231058, EPI_ISL_3231059, EPI_ISL_3307479, EPI_ISL_3307495, EPI_ISL_3307601, EPI_ISL_3546464, EPI_ISL_3797214, EPI_ISL_3797318, EPI_ISL_3982189, EPI_ISL_4461290, EPI_ISL_4656677, EPI_ISL_5888659, EPI_ISL_6092160, EPI_ISL_6092196, EPI_ISL_6092420, EPI_ISL_6332575, EPI_ISL_6332614, EPI_ISL_6332780, EPI_ISL_6698232, EPI_ISL_6698448                                                                                                                                                                                                                                                                                                                                                                                                                                                                                                                                                                                                                                                                                                                                                                                                                                                                                                                                                                                                                                                                                                                                                                                                                                                                                                                                                                                                                                                                                                                                                                                                                                                                                                                                                                                                                                                                                                                                                                                                                                                                                                                                                                                                                                                                                                                                                                                                                                                                                                                                                                                                                                                                                                                                                                                                                                                                                                                                                                                                                                                                                                                                                                                                                                                                                                                                                                                                                  | Berghaler laboratory, CeMM Research Center for Molecular Medicine of the Austrian         | Andreas Berghaler; Anna Schedl; Bekir Erguner; Benedikt Agerer; Christoph Bock; Fabian Amman; Jan Laine; Lukas Endler; Maelle Le Moing; Martin Senekowitsch; Matthew Thornton; Michael Schuster; Michelle Chan; Petr Triska; Thomas Penz                                                                                                                                                                                            |                                                                                                                                                                                                                                                                                                                                                                                                                                                                                                                                                                                                                                                                                                                                       |

|                                                                                                                                                                                                                                                                                                                                                                                                                                                                                                             |                                                                                                                             |                                                                                                                                                        |                                                                                                                                                                                                                                                                                                                                                                                                                                                                                                                                                                                                                                                                                                               |
|-------------------------------------------------------------------------------------------------------------------------------------------------------------------------------------------------------------------------------------------------------------------------------------------------------------------------------------------------------------------------------------------------------------------------------------------------------------------------------------------------------------|-----------------------------------------------------------------------------------------------------------------------------|--------------------------------------------------------------------------------------------------------------------------------------------------------|---------------------------------------------------------------------------------------------------------------------------------------------------------------------------------------------------------------------------------------------------------------------------------------------------------------------------------------------------------------------------------------------------------------------------------------------------------------------------------------------------------------------------------------------------------------------------------------------------------------------------------------------------------------------------------------------------------------|
| EPI_ISL_3204709,<br>EPI_ISL_3204713                                                                                                                                                                                                                                                                                                                                                                                                                                                                         | Avelab                                                                                                                      | Academy of Sciences<br>Instituto Nacional de Saude<br>(INSA)                                                                                           | Borges et al                                                                                                                                                                                                                                                                                                                                                                                                                                                                                                                                                                                                                                                                                                  |
| EPI_ISL_1321763, EPI_ISL_1336816, EPI_ISL_2001463, EPI_ISL_3532707, EPI_ISL_3737267, EPI_ISL_4998423, EPI_ISL_5194415, EPI_ISL_6511889                                                                                                                                                                                                                                                                                                                                                                      |                                                                                                                             |                                                                                                                                                        |                                                                                                                                                                                                                                                                                                                                                                                                                                                                                                                                                                                                                                                                                                               |
| see above                                                                                                                                                                                                                                                                                                                                                                                                                                                                                                   | Azienda Ospedaliera Terni                                                                                                   | Istituto Zooprofilattico<br>Sperimentale dell'Abruzzo e<br>Molise "G. Caporale"                                                                        | Ancora M; Biagetti M; Calistri P; Cammà C; Caporale M; Curini V; Delli Compagni E; Di Domenico M; Di Pasquale A; Giammarioli M; Lorusso A; Mangone I; Marcacci M; Palumbo M; Puglia I; Rinaldi A; Savini G; Scaccetti A; Scialabba S                                                                                                                                                                                                                                                                                                                                                                                                                                                                          |
| EPI_ISL_1489744                                                                                                                                                                                                                                                                                                                                                                                                                                                                                             | Azienda Sanitaria dell'Alto Adige                                                                                           | Laboratorio Aziendale di Microbiologia e Virologia                                                                                                     | Istituto di Genomica Applicata                                                                                                                                                                                                                                                                                                                                                                                                                                                                                                                                                                                                                                                                                |
| EPI_ISL_5303933                                                                                                                                                                                                                                                                                                                                                                                                                                                                                             | Azienda USL Umbria 2                                                                                                        | Istituto Zooprofilattico<br>Sperimentale dell'Abruzzo e<br>Molise "G. Caporale"                                                                        | Ancora M; Biagetti M; Calistri P; Cammà C; Curini V; Delli Compagni E; Di Domenico M; Di Pasquale A; Giammarioli M; Lorusso A; Mangone I; Marcacci M; Pistono E; Proietti A; Puglia I; Rinaldi A; Savini G; Scialabba S                                                                                                                                                                                                                                                                                                                                                                                                                                                                                       |
| EPI_ISL_514581                                                                                                                                                                                                                                                                                                                                                                                                                                                                                              | B.J. Medical College and Civil hospital, Ahmedabad                                                                          | Gujarat Biotechnology Research<br>Centre                                                                                                               | A M Kadri; Afzal Ansari; Apurvasinh Puvar; Chaitanya Joshi; Dinesh Kumar; Harsh Bakshi; Janvi Raval; Kamlesh J Upadhyay; Komal Patel; Labhi Pandya; Madhvi Joshi; Maharshi Pandya; Monika Gandhi; Nidhi Patel; Nikha Trivedi; Nitin Savaliya; Pinal Trivedi; Pranay Shah; R D Dixit; Raghawendra Kumar; Sanjay Kapadia; Zarna Patel; Zuber Saiyed                                                                                                                                                                                                                                                                                                                                                             |
| EPI_ISL_6916799                                                                                                                                                                                                                                                                                                                                                                                                                                                                                             | B2A-LABORATOIRE DU FLORIVAL                                                                                                 | CERBA HealthCare                                                                                                                                       | Bénédicte Roquebert; Laura Verdurem; Sabine Trombert; Stéphanie Haim-Boukobza                                                                                                                                                                                                                                                                                                                                                                                                                                                                                                                                                                                                                                 |
| EPI_ISL_2779510                                                                                                                                                                                                                                                                                                                                                                                                                                                                                             | BATUK                                                                                                                       | USAMRD-A, Basic Science<br>Laboratory                                                                                                                  | Alan Lemtudo; Beth Mutai; Brian Andika; Carol Kifude; Clement Masake; Eric Muthanje; Esther Omuseni; Faith Sigie; Gathii Kimita; George Awinda; John Waitumbi; Josphat Nyataya; Rachel Githii; Rehema Liyai; Stephen Ochola                                                                                                                                                                                                                                                                                                                                                                                                                                                                                   |
| EPI_ISL_6959879                                                                                                                                                                                                                                                                                                                                                                                                                                                                                             | BBTKL PP Kelas 1 Batam                                                                                                      | Faculty of Medicine, Universitas<br>Indonesia                                                                                                          | Ajeng Megawati Fajrin; Anis Kanuniawati; Ari Fahrial Syam; Badriul Hegar; Beti Ernawati; Dimas Ramadhian Noor; Fadilah; Fera Ibrahim; Hana Aparsi Pawestri; Khaerunissa Anbar Istiadi; Linda Erlina; Rafika Indah Paramita; Subangkit; Vivi Setiawaty                                                                                                                                                                                                                                                                                                                                                                                                                                                         |
| EPI_ISL_412965, EPI_ISL_415578, EPI_ISL_415582, EPI_ISL_415584, EPI_ISL_415588, EPI_ISL_415589, EPI_ISL_418816, EPI_ISL_418820, EPI_ISL_418822, EPI_ISL_418824, EPI_ISL_418825, EPI_ISL_418826, EPI_ISL_418830, EPI_ISL_418832, EPI_ISL_418834, EPI_ISL_418835, EPI_ISL_418838, EPI_ISL_418841, EPI_ISL_418847, EPI_ISL_418850, EPI_ISL_418854, EPI_ISL_418855, EPI_ISL_418858, EPI_ISL_968370, EPI_ISL_970021, EPI_ISL_970674, EPI_ISL_974665, EPI_ISL_974938                                              |                                                                                                                             |                                                                                                                                                        |                                                                                                                                                                                                                                                                                                                                                                                                                                                                                                                                                                                                                                                                                                               |
| see above                                                                                                                                                                                                                                                                                                                                                                                                                                                                                                   | BCCDC Public Health Laboratory                                                                                              | BCCDC Public Health Laboratory                                                                                                                         | Ana Pacagnella; Choi; Corrinne Ng; Dan Fornika; Gilmour; Harrigan; Hoang; John Tyson; Kamelian; Kim Macdonald; Kimia Kamelian; Krajdjen; Lapointe; Lee; Levetti; Li; Linda Hoang; Loman; Loretta Janz; Mel Krajdjen; Prystajeky; Prystajeky Natalie; Quick; Robert Azana Terry Snutch; Sekirov; Shannon Russell; Snutch; Tyson                                                                                                                                                                                                                                                                                                                                                                                |
| EPI_ISL_1628793                                                                                                                                                                                                                                                                                                                                                                                                                                                                                             | BIO AUSTRAL                                                                                                                 | UMR PIMIT                                                                                                                                              | Dr Camille Lebarbenchon; Dr David A Wilkinson; Dr Patrick Mavingui; Magali Turpin                                                                                                                                                                                                                                                                                                                                                                                                                                                                                                                                                                                                                             |
| EPI_ISL_1755053,<br>EPI_ISL_1756449                                                                                                                                                                                                                                                                                                                                                                                                                                                                         | BIOMNIS EUROFINIS IVRY                                                                                                      | Department of Virology, Henri<br>Mondor University Hospital,<br>Assistance Publique Hôpitaux de<br>Paris, Université Paris-Est Créteil,<br>INSERM U955 | Alexandre Soulier; Christophe Rodriguez; Elisabeth Trawinski; Guillaume Gricourt; Jean-Michel Pawlotsky; Melissa N'Debi; Slim Fourati; Vanessa Demontant                                                                                                                                                                                                                                                                                                                                                                                                                                                                                                                                                      |
| EPI_ISL_1613249,<br>EPI_ISL_2141818                                                                                                                                                                                                                                                                                                                                                                                                                                                                         | BIOR                                                                                                                        | Latvian Biomedical Research and<br>Study Centre                                                                                                        | Daina Pule; Davids Fridmanis; Elina Dimina; Guntars Zarins; Irena Meistere; Ivars Silamikelis; Janis Klovinis; Janis Pjalkovskis; Juris Perevoscikovs; Kaspars Megnis; Laila Silamikele; Lauma Freimane; Laura Ansons; Liga Birzniece; Monta Ustinova; Nikita Zrelovs; Uga Dumpis; Una Krumina; Vita Rovite                                                                                                                                                                                                                                                                                                                                                                                                   |
| EPI_ISL_2017767,<br>EPI_ISL_2405137                                                                                                                                                                                                                                                                                                                                                                                                                                                                         | BJ Medical College and Civil Hospital, Ahmedabad                                                                            | Gujarat Biotechnology Research<br>Centre                                                                                                               | Chaitanya Joshi; Dinesh Kumar; Janvi Raval; Madhvi Joshi; Nitesh Shah; Nitin Savaliya; Pranay Shah; Pranay Shah; Ramesh Pandit; Sonal Sharma; Twinkle Soni; Umang Mishra; Zarna Patel; Zuber Saiyed                                                                                                                                                                                                                                                                                                                                                                                                                                                                                                           |
| EPI_ISL_6575463,<br>EPI_ISL_6575465                                                                                                                                                                                                                                                                                                                                                                                                                                                                         | BJMC,Pune                                                                                                                   | RF-IISER Pune                                                                                                                                          | Aurnab Ghose; Joy Merwin Monteiro; Krishanpal Karmodiya; Rajesh Karyakarte; Suvarna Joshi                                                                                                                                                                                                                                                                                                                                                                                                                                                                                                                                                                                                                     |
| EPI_ISL_1663259                                                                                                                                                                                                                                                                                                                                                                                                                                                                                             | BRLSABVM Government Medical College, Rajnandgaon, Chhattisgarh                                                              | Institute of Life Sciences -<br>INSACOG                                                                                                                | Ajay Parida; Amol M. Kanampaliwar; Arup Ghosh; Atimukta Jha; INSACOG Consortium; Punit Prasad; Rajeeb Swain; Rupesh Dash; Safal Walia; Shifu Aggarwal; Sunil K. Raghav                                                                                                                                                                                                                                                                                                                                                                                                                                                                                                                                        |
| EPI_ISL_1755287                                                                                                                                                                                                                                                                                                                                                                                                                                                                                             | BROUSSAIS                                                                                                                   | Department of Virology, Henri<br>Mondor University Hospital,<br>Assistance Publique Hôpitaux de<br>Paris, Université Paris-Est Créteil,<br>INSERM U955 | Alexandre Soulier; Christophe Rodriguez; Elisabeth Trawinski; Guillaume Gricourt; Jean-Michel Pawlotsky; Melissa N'Debi; Slim Fourati; Vanessa Demontant                                                                                                                                                                                                                                                                                                                                                                                                                                                                                                                                                      |
| EPI_ISL_5441815,<br>EPI_ISL_5441823                                                                                                                                                                                                                                                                                                                                                                                                                                                                         | BTKL PP Kelas 1 Manado                                                                                                      | National Institute of Health<br>Research and Development                                                                                               | Arie Ardiansyah Nugraha; Fajar Nur Sulistiyohadi; Hana Aparsi Pawestri; Hartanti Dian Ikawati; Kartika Dewi Puspa; Krisna Pangesti; Nelly Puspandari; Subangkit; Triyani Soekarso; Vivi Setiawaty                                                                                                                                                                                                                                                                                                                                                                                                                                                                                                             |
| EPI_ISL_884857                                                                                                                                                                                                                                                                                                                                                                                                                                                                                              | Bacteriology, Georgia Public Health Laboratory (GPHL)                                                                       | Bacteriology, Georgia Public<br>Health Laboratory (GPHL)                                                                                               | Dixey, C.; Edwards, J.; Parrott, T.; Reeves, S.                                                                                                                                                                                                                                                                                                                                                                                                                                                                                                                                                                                                                                                               |
| EPI_ISL_2154037                                                                                                                                                                                                                                                                                                                                                                                                                                                                                             | Baguio General Hospital Medical Center (BGHMC)                                                                              | Philippine Genome Center                                                                                                                               | Alethea R. de Guzman; Anna Ong-Lim; Arianne A. Zamora; Asia Louisa U. Chong; Benedict A. Maralit; Candice Francheska B. Tambaon; Carlo M. Lapid; Celia Carlos; Devon Ray Pacial; Edsel Maurice Salvaña; El King D. Morado; Eva Maria Cutiongco-de la Paz; Francis A. Tablizo; Irish Coleen A. Asin; Jaime C. Montoya; Jan Michael C. Yap; Jo-Hannah S. Llamas; John Q. Wong; Joshua Gregor A. Dizon; Juan Antonio R. Magalang; Karol Sophia Agape R. Padilla; Kenneth M. Kim; Kris P. Punayan; Marc Edsel C. Ayres; Marc Jerrone R. Castro; Maria Rosario Singh-Vergeire and Cynthia P. Saloma; Maria Sofia L. Yangzon; Marissa Alejandria; Razel Nikka M. Hao; Rianna Patricia S. Cruz; Sheila Mae M. Araiza |
| EPI_ISL_1302466                                                                                                                                                                                                                                                                                                                                                                                                                                                                                             | Baltic Medics                                                                                                               | Lithuanian University of Health<br>Sciences Hospital, Department<br>of Genetics and Molecular<br>Medicine                                              | Astra Vitkauskienė; Darius Cereskevicius; Inga Nasvytiene; Mantas Sarauskas; Marius Sukys; Rasa Ugenskiene; Renaldas Jurkevicius; Zivile Zemeckiene                                                                                                                                                                                                                                                                                                                                                                                                                                                                                                                                                           |
| EPI_ISL_3246866, EPI_ISL_3246886, EPI_ISL_3246889, EPI_ISL_3274200, EPI_ISL_3274212, EPI_ISL_3274217, EPI_ISL_3274220, EPI_ISL_3274221, EPI_ISL_3274222, EPI_ISL_3274223, EPI_ISL_3274236, EPI_ISL_3274238, EPI_ISL_3274242                                                                                                                                                                                                                                                                                 |                                                                                                                             |                                                                                                                                                        |                                                                                                                                                                                                                                                                                                                                                                                                                                                                                                                                                                                                                                                                                                               |
| see above                                                                                                                                                                                                                                                                                                                                                                                                                                                                                                   | Baptist Health Medical Center                                                                                               | Center for Global Health,<br>University of New Mexico Health<br>Sciences Center                                                                        | Amanda Novack; Darrell Dinwiddie; Daryl Domman; Dirk Haselow; Joshua L. Kennedy; Kurt Schwalm; Valerie Morley                                                                                                                                                                                                                                                                                                                                                                                                                                                                                                                                                                                                 |
| EPI_ISL_1636887                                                                                                                                                                                                                                                                                                                                                                                                                                                                                             | Barts Health NHS Trust                                                                                                      | COVID-19 Genomics UK (COG-<br>UK) Consortium                                                                                                           | BROAD; Beatrix; CUTINO-MOGUEL; Claire; David; Dola; HARRINGTON; KELE; KULASEGARAN-SHYLINI; Maria-Teresa; OWOYEMI; Raghavendran                                                                                                                                                                                                                                                                                                                                                                                                                                                                                                                                                                                |
| EPI_ISL_3237262                                                                                                                                                                                                                                                                                                                                                                                                                                                                                             | Basurto University Hospital: Clinical Microbiology Laboratory                                                               | Biocruces Bizkaia                                                                                                                                      | Ana de la Hoz; Estibaliz Ugalde Zarraga; José Luis Díaz de Tuesta del Arco; Mikel Gallego Rodrigo; Mikel Urrutikoetxea-Gutiérrez; M <sup>o</sup> Carmen Nieto Toboso                                                                                                                                                                                                                                                                                                                                                                                                                                                                                                                                          |
| EPI_ISL_1627416,<br>EPI_ISL_3214813                                                                                                                                                                                                                                                                                                                                                                                                                                                                         | Baylor Scott & White-Temple                                                                                                 | Baylor Scott & White-Temple                                                                                                                            | Ari Rao; Caitlin Maloney; Kimberly Walker; Linden Morales; Marcus Volz; Shelby Hendrickson; Shelby Johnson                                                                                                                                                                                                                                                                                                                                                                                                                                                                                                                                                                                                    |
| EPI_ISL_6575599                                                                                                                                                                                                                                                                                                                                                                                                                                                                                             | Beheshti Hospital, School of Medicine, kashan University of Medical Sciences, Kashan, Iran.                                 | Genetics Research Center,<br>University of Social Welfare and<br>Rehabilitation Sciences                                                               | Ahmad Piroozmand; Ali Jafarpour; Azam Ghaziasadi; Hossein Najmabadi.; Kimia Kahrizi; Maedeh Najafzadeh; Mahzad Erami; Maryam Beheshtian; Marzieh Mohseni; Parsa ghafari; Zohreh Fattahi                                                                                                                                                                                                                                                                                                                                                                                                                                                                                                                       |
| EPI_ISL_1529045,<br>EPI_ISL_1742816,<br>EPI_ISL_2204476,<br>EPI_ISL_2204761                                                                                                                                                                                                                                                                                                                                                                                                                                 | Berkeley Medical Center                                                                                                     | WVU and Marshall University<br>Combined Genomics Core<br>Facilities                                                                                    | "James Denvir; James Denvir; Peter Perrotta; Peter Stoilov; Ryan Percifield; Ryan Percifield"; Wesley Kimble                                                                                                                                                                                                                                                                                                                                                                                                                                                                                                                                                                                                  |
| EPI_ISL_3202128, EPI_ISL_3202408, EPI_ISL_3202789, EPI_ISL_3222162, EPI_ISL_3222193, EPI_ISL_3224812, EPI_ISL_3227908, EPI_ISL_3249338, EPI_ISL_3249405, EPI_ISL_3249488, EPI_ISL_3249544, EPI_ISL_3249684, EPI_ISL_3249757, EPI_ISL_3250535, EPI_ISL_3250544, EPI_ISL_3281981, EPI_ISL_3284024, EPI_ISL_3284077, EPI_ISL_3284080, EPI_ISL_3284083, EPI_ISL_3284140, EPI_ISL_3284163, EPI_ISL_3284317, EPI_ISL_3284376, EPI_ISL_3285320, EPI_ISL_3285333, EPI_ISL_3285740, EPI_ISL_3285749, EPI_ISL_3285853 |                                                                                                                             |                                                                                                                                                        |                                                                                                                                                                                                                                                                                                                                                                                                                                                                                                                                                                                                                                                                                                               |
| see above                                                                                                                                                                                                                                                                                                                                                                                                                                                                                                   | Berkshire and Surrey Pathology Services Lighthouse Laboratory                                                               | Wellcome Sanger Institute for the<br>COVID-19 Genomics UK<br>(COG-UK) Consortium                                                                       | Berkshire and Surrey Pathology Services Lighthouse Laboratory and Alex Alderton; Cordelia Langford; David K. Jackson; Dominic Kwiatkowski; Ewan Harrison; Ian Johnston; Jeffrey Barrett; John Sillitoe on behalf of the Wellcome Sanger Institute COVID-19 Surveillance Team; Roberto Amato; Sonia Goncalves                                                                                                                                                                                                                                                                                                                                                                                                  |
| EPI_ISL_1706999,<br>EPI_ISL_1707198,<br>EPI_ISL_1755433,<br>EPI_ISL_1755624                                                                                                                                                                                                                                                                                                                                                                                                                                 | Biogroup Bio Lam-LCD Saint-Denis                                                                                            | Department of Virology, Henri<br>Mondor University Hospital,<br>Assistance Publique Hôpitaux de<br>Paris, Université Paris-Est Créteil,<br>INSERM U955 | Alexandre Soulier; Christophe Rodriguez; Elisabeth Trawinski; Guillaume Gricourt; Jean-Michel Pawlotsky; Melissa N'Debi; Slim Fourati; Vanessa Demontant                                                                                                                                                                                                                                                                                                                                                                                                                                                                                                                                                      |
| EPI_ISL_953313,<br>EPI_ISL_1476816,<br>EPI_ISL_1833940                                                                                                                                                                                                                                                                                                                                                                                                                                                      | Bioinformatics and Biostatistics Lab, Advanced Sequencing Facility                                                          | COVID-19 Genomics UK (COG-<br>UK) Consortium                                                                                                           | Aengus Stewart; Chelsea Sawyer; Harshil Patel; Jerome Nicod; Laura Cubitt; Margaret Crawford                                                                                                                                                                                                                                                                                                                                                                                                                                                                                                                                                                                                                  |
| EPI_ISL_7979250                                                                                                                                                                                                                                                                                                                                                                                                                                                                                             | Biolab Diagnostic Laboratories                                                                                              | Biolab Diagnostic Laboratories                                                                                                                         | Ahmad Tibi; Amid Abdelnour; Badia Saddedin; Eiad Atwa; Issa Abu-Dayyeh; Lama Hussein; Shaima Ali                                                                                                                                                                                                                                                                                                                                                                                                                                                                                                                                                                                                              |
| EPI_ISL_1524353                                                                                                                                                                                                                                                                                                                                                                                                                                                                                             | Biology Department, College of Science, Al Muthanna University and Public Health Laboratory, Al-Muthanna Health Directorate | Department of Virology, Faculty<br>of Medicine, University of<br>Helsinki, Helsinki, Finland                                                           | Alaa Hameed; Ali Jasim; Hussein Alburkat; Murad Munahi; Nihad Al-Rashedi; Olli Vapalahti; Tarja Sironen; Teemu Smura                                                                                                                                                                                                                                                                                                                                                                                                                                                                                                                                                                                          |
| EPI_ISL_2928225<br>EPI_ISL_1498436,<br>EPI_ISL_1498460,<br>EPI_ISL_1498475<br>EPI_ISL_1697438                                                                                                                                                                                                                                                                                                                                                                                                               | Biomédicos de Mérida<br>BioneXt Lab<br>Bioptická laboratoř, s.r.o.                                                          | Biomédicos de Mérida<br>Laboratoire national de sante,<br>Microbiology, Microbial<br>Genomics Platform<br>Bioptická laboratoř, s.r.o.                  | CANCHE-PECH JOSE REYES; CAUICH-VERA KRISTIAN; CEBALLOS-LOPEZ ADRIAN; CHIN-HAU LETICIA; GARCIA-GONZALEZ IGRID; LOPEZ-NOVELO MARIA E; MENDOZA-OLIVEROS TAHALI; SAURI-MEDINA EMILY<br>Anke Wienecke-Baldacchino; Catherine Ragimbeau; Fatu Djabi; Jessica Tapp; Lise Pignon; Raoul Salmon; Tamir Abdelrahman; Thibault Ferrandon<br>Martina Putzová; Michaela Říhová; Nikola Bláh; Petr Šteiner; Silva Vondráčková; Tomáš Vaněček                                                                                                                                                                                                                                                                                |
| EPI_ISL_1349825, EPI_ISL_1433157, EPI_ISL_1438970, EPI_ISL_1568987, EPI_ISL_1569078, EPI_ISL_1639151, EPI_ISL_1642453, EPI_ISL_1642576, EPI_ISL_2108749, EPI_ISL_2108846, EPI_ISL_2109668, EPI_ISL_2109754, EPI_ISL_2109834, EPI_ISL_2121892, EPI_ISL_3237996, EPI_ISL_3238088, EPI_ISL_3238168, EPI_ISL_3238563, EPI_ISL_3238741                                                                                                                                                                           |                                                                                                                             |                                                                                                                                                        |                                                                                                                                                                                                                                                                                                                                                                                                                                                                                                                                                                                                                                                                                                               |
| see above                                                                                                                                                                                                                                                                                                                                                                                                                                                                                                   | Bioscientia Labor Wermsdorf                                                                                                 | Robert Koch Institute                                                                                                                                  |                                                                                                                                                                                                                                                                                                                                                                                                                                                                                                                                                                                                                                                                                                               |

|                                                                                                                                                                                                                                                                                                                                                                                                                                                                                                                                                                                                                                                                                                                                                                                                                                                                                                                                                                                                                                                                                                                                                                                                                                                                                                                                                                                                                                                                                                                                                                                                                        |                                                       |                                                                                                                                                |                                                                                                                                                                                                                                                                                                                                                                                                                                                                                                                                                                  |
|------------------------------------------------------------------------------------------------------------------------------------------------------------------------------------------------------------------------------------------------------------------------------------------------------------------------------------------------------------------------------------------------------------------------------------------------------------------------------------------------------------------------------------------------------------------------------------------------------------------------------------------------------------------------------------------------------------------------------------------------------------------------------------------------------------------------------------------------------------------------------------------------------------------------------------------------------------------------------------------------------------------------------------------------------------------------------------------------------------------------------------------------------------------------------------------------------------------------------------------------------------------------------------------------------------------------------------------------------------------------------------------------------------------------------------------------------------------------------------------------------------------------------------------------------------------------------------------------------------------------|-------------------------------------------------------|------------------------------------------------------------------------------------------------------------------------------------------------|------------------------------------------------------------------------------------------------------------------------------------------------------------------------------------------------------------------------------------------------------------------------------------------------------------------------------------------------------------------------------------------------------------------------------------------------------------------------------------------------------------------------------------------------------------------|
| EPI_ISL_1568991, EPI_ISL_1721106, EPI_ISL_1721362, EPI_ISL_1843558, EPI_ISL_2109547, EPI_ISL_2109785, EPI_ISL_2125941, EPI_ISL_2328855<br>see above                                                                                                                                                                                                                                                                                                                                                                                                                                                                                                                                                                                                                                                                                                                                                                                                                                                                                                                                                                                                                                                                                                                                                                                                                                                                                                                                                                                                                                                                    | Bioscientia MVZ Labor Karlsruhe GmbH                  | Robert Koch Institute                                                                                                                          |                                                                                                                                                                                                                                                                                                                                                                                                                                                                                                                                                                  |
| EPI_ISL_1970265                                                                                                                                                                                                                                                                                                                                                                                                                                                                                                                                                                                                                                                                                                                                                                                                                                                                                                                                                                                                                                                                                                                                                                                                                                                                                                                                                                                                                                                                                                                                                                                                        | Biotechnology Division, NCDC Delhi                    | NCDC Delhi, Biotechnology Division                                                                                                             | Hema Gogia; Hemlata Lall; Kalaiarasan Ponnusamy; Mahesh S Dhar; Manoj K Singh; Meena Datta; Partha Rakshit; Preeti Madan; Priyanka Singh; Radhakrishnan V. S; Robin Marwal; Sandhya Kabra; Sujet K Singh; Uma Sharma                                                                                                                                                                                                                                                                                                                                             |
| EPI_ISL_3948470                                                                                                                                                                                                                                                                                                                                                                                                                                                                                                                                                                                                                                                                                                                                                                                                                                                                                                                                                                                                                                                                                                                                                                                                                                                                                                                                                                                                                                                                                                                                                                                                        | Botswana Harvard AIDS Institute Partnership           | Botswana Harvard HIV Reference Laboratory                                                                                                      | Boitumelo Zuze; Botshelo Radibe; Dorcas Maruapula; Joseph Makheha; Keoratlé Ntshambiwa; Kgomotso Moruisi; Legodile Koeopile; Mosepele Mosepele; Mphaphi B. Mbulawa; Ontlametse T. Bareng; Pamela Smith-Lawrence; Patrick T. Mokgethi; Roger Shapiro; Sefetogi Ramaolaga; Shahin Lockman; Sikhulile Moyo; Simani Gaseitsiwe; Thongbotho Mphoyakgosi; Wonderful T. Choga                                                                                                                                                                                           |
| EPI_ISL_2820350                                                                                                                                                                                                                                                                                                                                                                                                                                                                                                                                                                                                                                                                                                                                                                                                                                                                                                                                                                                                                                                                                                                                                                                                                                                                                                                                                                                                                                                                                                                                                                                                        | Botswana Harvard HIV Reference Laboratory             | Botswana Harvard HIV Reference Laboratory                                                                                                      | Boitumelo Zuze; Botshelo Radibe; Dorcas Maruapula; Godfrey Simoonga; Joseph Makheha; Keoratlé Ntshambiwa; Kereng Mphoyakgosi; Legodile Koeopile; Madisa Mine; Modisa Motswaledi; Mosepele Mosepele; Motlalepule L. Pone; Ontlametse T. Bareng; Roger Shapiro; Shahin Lockman; Sikhulile Moyo; Simani Gaseitsiwe; Thongbotho Mphoyakgosi; Wonderful T. Choga                                                                                                                                                                                                      |
| EPI_ISL_1578281, EPI_ISL_1578392, EPI_ISL_1710454, EPI_ISL_1744199, EPI_ISL_1744234, EPI_ISL_1787314, EPI_ISL_1825587, EPI_ISL_1968117, EPI_ISL_1971559, EPI_ISL_1971635, EPI_ISL_2103852<br>see above                                                                                                                                                                                                                                                                                                                                                                                                                                                                                                                                                                                                                                                                                                                                                                                                                                                                                                                                                                                                                                                                                                                                                                                                                                                                                                                                                                                                                 | Broad Institute Clinical Research Sequencing Platform | Infectious Disease Program, Broad Institute of Harvard and MIT                                                                                 | Adams, G.; B.L.; B.W.; Bauer, M.; Birren; Blumenstiel, B.; Brown, C.; Carter, A.; Chaluviadi, S.; D.J.; DeFelice, M.; DeRuff, K.; Dodge, S.; Gabriel, S.; Gallagher, G.; Gladden-Young, A.; Granger, B.; J.E.; K.J.; Lagerborg, K.; Larkin, K.; Lee, M.; Lemieux; Lennon, N.; Loreth, C.; Madoff, L.; McGovern, S.; Meldrum, J.; Normandin, E.; P.C.; Park; Pearlman, L.; Reilly, S.; Rudy, M.; Sabeti; Siddle; Smole, S.; Tomkins-Tinch, C.; Vicente, G.; and MacInnis                                                                                          |
| EPI_ISL_1661126                                                                                                                                                                                                                                                                                                                                                                                                                                                                                                                                                                                                                                                                                                                                                                                                                                                                                                                                                                                                                                                                                                                                                                                                                                                                                                                                                                                                                                                                                                                                                                                                        | Brussels Academic Hospital Lab (LHUB-ULB)             | Labo Klinische Biologie, UZA                                                                                                                   | Basil Britto Xavier; Christine Lammens; Herman Goossens; Jasmine Coppens; Marie Le Mercier; Veerle Matheusens                                                                                                                                                                                                                                                                                                                                                                                                                                                    |
| EPI_ISL_414520, EPI_ISL_414521                                                                                                                                                                                                                                                                                                                                                                                                                                                                                                                                                                                                                                                                                                                                                                                                                                                                                                                                                                                                                                                                                                                                                                                                                                                                                                                                                                                                                                                                                                                                                                                         | Bundeswehr Institute of Microbiology                  | Bundeswehr Institute of Microbiology                                                                                                           | Markus H Antwerpen and Roman Wölfel; Mathias C Walter                                                                                                                                                                                                                                                                                                                                                                                                                                                                                                            |
| EPI_ISL_1833954                                                                                                                                                                                                                                                                                                                                                                                                                                                                                                                                                                                                                                                                                                                                                                                                                                                                                                                                                                                                                                                                                                                                                                                                                                                                                                                                                                                                                                                                                                                                                                                                        | Bundeswehrkrankenhaus Berlin                          | Bundeswehr Institute of Microbiology                                                                                                           | Alexandra Rehn; Enrico Georgi; Malena Besthorn-Willmann; Markus Antwerpen; Mathias Walter; Mike Pillukat; Roman Wölfel; Sabine Zange                                                                                                                                                                                                                                                                                                                                                                                                                             |
| EPI_ISL_1364950                                                                                                                                                                                                                                                                                                                                                                                                                                                                                                                                                                                                                                                                                                                                                                                                                                                                                                                                                                                                                                                                                                                                                                                                                                                                                                                                                                                                                                                                                                                                                                                                        | Bundeswehrkrankenhaus Ulm                             | Bundeswehr Institute of Microbiology                                                                                                           | Alexandra Rehn; Enrico Georgi; Malena Besthorn-Willmann; Markus Antwerpen; Mathias Walter; Mike Pillukat; Roman Wölfel; Sabine Zange                                                                                                                                                                                                                                                                                                                                                                                                                             |
| EPI_ISL_4549037                                                                                                                                                                                                                                                                                                                                                                                                                                                                                                                                                                                                                                                                                                                                                                                                                                                                                                                                                                                                                                                                                                                                                                                                                                                                                                                                                                                                                                                                                                                                                                                                        | C.H. FOUGERES                                         | CHU Pontchaillou                                                                                                                               | DE TAYRAC Marie; DEKEYSER Sophie; DENOUAL Florent; ETCHEVERRY Amandine; FEBREAU Christine; GALIBERT Marie Dominique; GROHLIER Claire; JAGLINE Steven; PRONIER Charlotte; QUENET Benjamin; SASSI Mohamed; THIBAUT Vincent                                                                                                                                                                                                                                                                                                                                         |
| EPI_ISL_5946535                                                                                                                                                                                                                                                                                                                                                                                                                                                                                                                                                                                                                                                                                                                                                                                                                                                                                                                                                                                                                                                                                                                                                                                                                                                                                                                                                                                                                                                                                                                                                                                                        | C.H. LE DAMANY LANNION-TRESTEL                        | CHU Pontchaillou                                                                                                                               | DE TAYRAC Marie; DENOUAL Florent; DUFOUR Marie Jose; ETCHEVERRY Amandine; FEBREAU Christine; GALIBERT Marie Dominique; GROHLIER Claire; JAGLINE Steven; PRONIER Charlotte; QUENET Benjamin; SASSI Mohamed; THIBAUT Vincent                                                                                                                                                                                                                                                                                                                                       |
| EPI_ISL_1795645                                                                                                                                                                                                                                                                                                                                                                                                                                                                                                                                                                                                                                                                                                                                                                                                                                                                                                                                                                                                                                                                                                                                                                                                                                                                                                                                                                                                                                                                                                                                                                                                        | C.H. ST BRIEUC                                        | CHU Pontchaillou                                                                                                                               | DE TAYRAC Marie; DENOUAL Florent; DUPIN Clarisse; ETCHEVERRY Amandine; FEBREAU Christine; GALIBERT Marie Dominique; GROHLIER Claire; JAGLINE Steven; MORVAN Odile; PRONIER Charlotte; QUENET Benjamin; SASSI Mohamed; THIBAUT Vincent                                                                                                                                                                                                                                                                                                                            |
| EPI_ISL_1477331, EPI_ISL_1477429, EPI_ISL_1478114, EPI_ISL_1701260, EPI_ISL_1701287                                                                                                                                                                                                                                                                                                                                                                                                                                                                                                                                                                                                                                                                                                                                                                                                                                                                                                                                                                                                                                                                                                                                                                                                                                                                                                                                                                                                                                                                                                                                    | CA DPH Viral and Rickettsial Disease Laboratory       | Chan-Zuckerberg Biohub                                                                                                                         | CZB Cliahub Consortium                                                                                                                                                                                                                                                                                                                                                                                                                                                                                                                                           |
| EPI_ISL_1272880, EPI_ISL_1798864, EPI_ISL_1823730                                                                                                                                                                                                                                                                                                                                                                                                                                                                                                                                                                                                                                                                                                                                                                                                                                                                                                                                                                                                                                                                                                                                                                                                                                                                                                                                                                                                                                                                                                                                                                      | CA-Los Angeles County Public Health Laboratory        | Centers for Disease Control and Prevention Division of Viral Diseases, Pathogen Discovery                                                      | Alison Laufer Halpin; Anna Montmayeur; Anna Uehara; Ben L. Rambo-Martin; Clinton R. Paden; Dakota Howard; Darlene Wagner; Dave Wentworth; Dhvani Batra; Haibin Wang; Jasmine Padilla; Jing Zhang; Justin Lee; Katie Dillon; Krista Queen; Kristen Knipe; Kristine Lacek; Lori Rowe; Mark Burroughs; Matthew Schmerer; Mili Sheth; Peter Cook; Peter W. Cook; Rachel Marine; Sam Shepard; Sarah Nobles; Shoshona Le; Suxiang Tong; Vivien Dugan; Yan Li; Ying Tao; Yvette Unoarumhi                                                                               |
| EPI_ISL_1226174                                                                                                                                                                                                                                                                                                                                                                                                                                                                                                                                                                                                                                                                                                                                                                                                                                                                                                                                                                                                                                                                                                                                                                                                                                                                                                                                                                                                                                                                                                                                                                                                        | CA-Los Angeles County Public Health Laboratory        | Genomics and Discovery, Respiratory Viruses Branch, Division of Viral Diseases, Centers for Disease Control and Prevention                     | Anna Montmayeur; Anna Uehara; Ben L. Rambo-Martin; Clinton R. Paden; Dhvani Batra; Haibin Wang; Jasmine Padilla; Jing Zhang; Justin Lee; Katie Dillon; Krista Queen; Kristen Knipe; Kristine Lacek; Lori Rowe; Mark Burroughs; Matthew Schmerer; Mili Sheth; Peter W. Cook; Rachel Marine; Sam Shepard; Sarah Nobles; Shoshona Le; Suxiang Tong; Yan Li; Ying Tao                                                                                                                                                                                                |
| EPI_ISL_1761301                                                                                                                                                                                                                                                                                                                                                                                                                                                                                                                                                                                                                                                                                                                                                                                                                                                                                                                                                                                                                                                                                                                                                                                                                                                                                                                                                                                                                                                                                                                                                                                                        | CAP EL REMEI                                          | Banc de Sang i Teixits                                                                                                                         | Carlos Hobeich; Francisco Vidal; Irene Corrales; Lorena Ramirez; Maria Glòria Soria; Natàlia Comes; Nina Borràs; Noemí Gonzalez; Silvia Sauleda                                                                                                                                                                                                                                                                                                                                                                                                                  |
| EPI_ISL_1553818                                                                                                                                                                                                                                                                                                                                                                                                                                                                                                                                                                                                                                                                                                                                                                                                                                                                                                                                                                                                                                                                                                                                                                                                                                                                                                                                                                                                                                                                                                                                                                                                        | CAP MANLLEU                                           | Banc de Sang i Teixits                                                                                                                         | Carlos Hobeich; Francisco Vidal; Irene Corrales; Lorena Ramirez; Maria Glòria Soria; Natàlia Comes; Nina Borràs; Noemí Gonzalez; Silvia Sauleda                                                                                                                                                                                                                                                                                                                                                                                                                  |
| EPI_ISL_1761233                                                                                                                                                                                                                                                                                                                                                                                                                                                                                                                                                                                                                                                                                                                                                                                                                                                                                                                                                                                                                                                                                                                                                                                                                                                                                                                                                                                                                                                                                                                                                                                                        | CAP MONTESQUIU                                        | Banc de Sang i Teixits                                                                                                                         | Carlos Hobeich; Francisco Vidal; Irene Corrales; Lorena Ramirez; Maria Glòria Soria; Natàlia Comes; Nina Borràs; Noemí Gonzalez; Silvia Sauleda                                                                                                                                                                                                                                                                                                                                                                                                                  |
| EPI_ISL_1761270                                                                                                                                                                                                                                                                                                                                                                                                                                                                                                                                                                                                                                                                                                                                                                                                                                                                                                                                                                                                                                                                                                                                                                                                                                                                                                                                                                                                                                                                                                                                                                                                        | CAP VIC NORD                                          | Banc de Sang i Teixits                                                                                                                         | Carlos Hobeich; Francisco Vidal; Irene Corrales; Lorena Ramirez; Maria Glòria Soria; Natàlia Comes; Nina Borràs; Noemí Gonzalez; Silvia Sauleda                                                                                                                                                                                                                                                                                                                                                                                                                  |
| EPI_ISL_2491654                                                                                                                                                                                                                                                                                                                                                                                                                                                                                                                                                                                                                                                                                                                                                                                                                                                                                                                                                                                                                                                                                                                                                                                                                                                                                                                                                                                                                                                                                                                                                                                                        | CDP COVID MONTLUCON                                   | CHU Clermont-Ferrand, service de virologie                                                                                                     | Bisseux Maxime; Combes Patricia; Henquell Cécile; Mirand Audrey                                                                                                                                                                                                                                                                                                                                                                                                                                                                                                  |
| EPI_ISL_3243447, EPI_ISL_3243448, EPI_ISL_3243449, EPI_ISL_3243457, EPI_ISL_3243468, EPI_ISL_3243470, EPI_ISL_3243472, EPI_ISL_3243473, EPI_ISL_3243502, EPI_ISL_3243507, EPI_ISL_3243516, EPI_ISL_3243568, EPI_ISL_3243571, EPI_ISL_3243581, EPI_ISL_3243583, EPI_ISL_3243585, EPI_ISL_3243592, EPI_ISL_3243612, EPI_ISL_3243615, EPI_ISL_3243623, EPI_ISL_3243628, EPI_ISL_3243644, EPI_ISL_3243646, EPI_ISL_3243658, EPI_ISL_3243667, EPI_ISL_3243699, EPI_ISL_3243709, EPI_ISL_3243712, EPI_ISL_3243714, EPI_ISL_3243732, EPI_ISL_3243751, EPI_ISL_3243756, EPI_ISL_3243779, EPI_ISL_3243787, EPI_ISL_3243802, EPI_ISL_3243805, EPI_ISL_3243810, EPI_ISL_3243825, EPI_ISL_3243830, EPI_ISL_3243833, EPI_ISL_3243838, EPI_ISL_3243848, EPI_ISL_3243881, EPI_ISL_3243914, EPI_ISL_3243921, EPI_ISL_3243957, EPI_ISL_3243963, EPI_ISL_3243965, EPI_ISL_3243966, EPI_ISL_3243968, EPI_ISL_3243981, EPI_ISL_3244015, EPI_ISL_3244015, EPI_ISL_3244029, EPI_ISL_3244039, EPI_ISL_3244046, EPI_ISL_3244048, EPI_ISL_3244051, EPI_ISL_3244075, EPI_ISL_3244091, EPI_ISL_3244106, EPI_ISL_3244121, EPI_ISL_3244133, EPI_ISL_3244150, EPI_ISL_3244158, EPI_ISL_3244235, EPI_ISL_3244236, EPI_ISL_3244248, EPI_ISL_3244269, EPI_ISL_3244273, EPI_ISL_3244275, EPI_ISL_3244288, EPI_ISL_3244316, EPI_ISL_3244319, EPI_ISL_3244325, EPI_ISL_3244330, EPI_ISL_3244336, EPI_ISL_3244382, EPI_ISL_3244361, EPI_ISL_3244366, EPI_ISL_3244385, EPI_ISL_3244396, EPI_ISL_3244423, EPI_ISL_3244440, EPI_ISL_3244453, EPI_ISL_3244466, EPI_ISL_3244479, EPI_ISL_3244488, EPI_ISL_3244491, EPI_ISL_3244511, EPI_ISL_3244519<br>see above | California Department of Public Health                | Emily Smith on behalf of CDPH-COVIDNet and UCSD EXCITE lab                                                                                     |                                                                                                                                                                                                                                                                                                                                                                                                                                                                                                                                                                  |
| EPI_ISL_2968838, EPI_ISL_2968996, EPI_ISL_2969137                                                                                                                                                                                                                                                                                                                                                                                                                                                                                                                                                                                                                                                                                                                                                                                                                                                                                                                                                                                                                                                                                                                                                                                                                                                                                                                                                                                                                                                                                                                                                                      | CDPH Valencia Branch Laboratory                       | California Department of Public Health                                                                                                         | CDPH-COVIDNet; Priva Path Labs Inc.                                                                                                                                                                                                                                                                                                                                                                                                                                                                                                                              |
| EPI_ISL_1788316                                                                                                                                                                                                                                                                                                                                                                                                                                                                                                                                                                                                                                                                                                                                                                                                                                                                                                                                                                                                                                                                                                                                                                                                                                                                                                                                                                                                                                                                                                                                                                                                        | CENTRE D'ANATOMIE ET DE CYTOLOGIE PATHOLOGIQUES       | CNR Virus des Infections Respiratoires - France SUD                                                                                            | Antonin Bal; Bruno Lina; Bruno Simon; Gregory Destras; Gwendolyne Burfin; Hadrien Regue; Laurence Josset; Martine Valette; Quentin Semanas                                                                                                                                                                                                                                                                                                                                                                                                                       |
| EPI_ISL_3234529                                                                                                                                                                                                                                                                                                                                                                                                                                                                                                                                                                                                                                                                                                                                                                                                                                                                                                                                                                                                                                                                                                                                                                                                                                                                                                                                                                                                                                                                                                                                                                                                        | CENTRE HOSPITALIER DE BIGORRE                         | CHU Purpan - Laboratoire de Virologie - Institut Fédératif de Biologie                                                                         | Bulach T., Donnadiou C., Izopet J., Latour J., Milhes M., Nicot F., Ranger N., Salin G., Tremeaux P.                                                                                                                                                                                                                                                                                                                                                                                                                                                             |
| EPI_ISL_1461037, EPI_ISL_1623198                                                                                                                                                                                                                                                                                                                                                                                                                                                                                                                                                                                                                                                                                                                                                                                                                                                                                                                                                                                                                                                                                                                                                                                                                                                                                                                                                                                                                                                                                                                                                                                       | CENTRE HOSPITALIER ST JOSEPH ST LUC                   | CNR Virus des Infections Respiratoires - France SUD                                                                                            | Antonin Bal; Bruno Lina; Bruno Simon; Gregory Destras; Gwendolyne Burfin; Hadrien Regue; Laurence Josset; Martine Valette; Quentin Semanas                                                                                                                                                                                                                                                                                                                                                                                                                       |
| EPI_ISL_2209527                                                                                                                                                                                                                                                                                                                                                                                                                                                                                                                                                                                                                                                                                                                                                                                                                                                                                                                                                                                                                                                                                                                                                                                                                                                                                                                                                                                                                                                                                                                                                                                                        | CENTRO DE SAUDE II IBITINGA                           | Instituto Butantan / Mendelics                                                                                                                 | Antonio Jorge Martins; Claudia Renata dos Santos Barros; David Schlesinger; Debora Botequão Moretti; Dimas Tadeu Covas; Elaine Cristina Marqueze; Elaine Vieira Santos; Evandra Strazza Rodrigues; Heidge Fukumasu; Jayme Augusto de Souza-Neto; José Salvatore Leister Patané; Luiz Alcantara; Luiz Lehmann Coutinho; Maria Carolina Elias; Maurício Lacerda Nogueira; Rafael dos Santos Bezerra; Rach Machedo Neto; Rejane Maria Tommasini Groto; Ricardo Haddad; Sandra Coccuzzo Sampaio Vessoni; Simone Kashima; Svetoslav Nanev Slavov; Vincent Louis Viala |
| EPI_ISL_1628991                                                                                                                                                                                                                                                                                                                                                                                                                                                                                                                                                                                                                                                                                                                                                                                                                                                                                                                                                                                                                                                                                                                                                                                                                                                                                                                                                                                                                                                                                                                                                                                                        | CERBALLIANCE                                          | UMR PIMIT                                                                                                                                      | Dr Camille Lebarbenchon; Dr David A Wilkinson; Dr Patrick Mavingui; Magali Turpin                                                                                                                                                                                                                                                                                                                                                                                                                                                                                |
| EPI_ISL_7015730                                                                                                                                                                                                                                                                                                                                                                                                                                                                                                                                                                                                                                                                                                                                                                                                                                                                                                                                                                                                                                                                                                                                                                                                                                                                                                                                                                                                                                                                                                                                                                                                        | CERBALLIANCE ALPES DURANCE SITE ORAISON               | CERBA HealthCare                                                                                                                               | Bénédicte Roquebert; Laura Verdurme; Sabine Trombert; Stéphanie Haim-Boukobza                                                                                                                                                                                                                                                                                                                                                                                                                                                                                    |
| EPI_ISL_7309579                                                                                                                                                                                                                                                                                                                                                                                                                                                                                                                                                                                                                                                                                                                                                                                                                                                                                                                                                                                                                                                                                                                                                                                                                                                                                                                                                                                                                                                                                                                                                                                                        | CERBALLIANCE COTE D'AZUR                              | CERBA HealthCare                                                                                                                               | Bénédicte Roquebert; Laura Verdurme; Sabine Trombert; Stéphanie Haim-Boukobza                                                                                                                                                                                                                                                                                                                                                                                                                                                                                    |
| EPI_ISL_7309541                                                                                                                                                                                                                                                                                                                                                                                                                                                                                                                                                                                                                                                                                                                                                                                                                                                                                                                                                                                                                                                                                                                                                                                                                                                                                                                                                                                                                                                                                                                                                                                                        | CERBALLIANCE HAUTS DE FRANCE                          | CERBA HealthCare                                                                                                                               | Bénédicte Roquebert; Laura Verdurme; Sabine Trombert; Stéphanie Haim-Boukobza                                                                                                                                                                                                                                                                                                                                                                                                                                                                                    |
| EPI_ISL_6367802                                                                                                                                                                                                                                                                                                                                                                                                                                                                                                                                                                                                                                                                                                                                                                                                                                                                                                                                                                                                                                                                                                                                                                                                                                                                                                                                                                                                                                                                                                                                                                                                        | CERBALLIANCE IDF OUEST                                | CERBA HealthCare                                                                                                                               | Bénédicte Roquebert; Laura Verdurme; Sabine Trombert; Stéphanie Haim-Boukobza                                                                                                                                                                                                                                                                                                                                                                                                                                                                                    |
| EPI_ISL_6958036                                                                                                                                                                                                                                                                                                                                                                                                                                                                                                                                                                                                                                                                                                                                                                                                                                                                                                                                                                                                                                                                                                                                                                                                                                                                                                                                                                                                                                                                                                                                                                                                        | CERBALLIANCE IDF OUEST SITE ALSACE                    | CERBA HealthCare                                                                                                                               | Bénédicte Roquebert; Laura Verdurme; Sabine Trombert; Stéphanie Haim-Boukobza                                                                                                                                                                                                                                                                                                                                                                                                                                                                                    |
| EPI_ISL_6940252                                                                                                                                                                                                                                                                                                                                                                                                                                                                                                                                                                                                                                                                                                                                                                                                                                                                                                                                                                                                                                                                                                                                                                                                                                                                                                                                                                                                                                                                                                                                                                                                        | CERBALLIANCE IDF OUEST SITE LE CHESNAY                | CERBA HealthCare                                                                                                                               | Bénédicte Roquebert; Laura Verdurme; Sabine Trombert; Stéphanie Haim-Boukobza                                                                                                                                                                                                                                                                                                                                                                                                                                                                                    |
| EPI_ISL_6261337, EPI_ISL_6439232                                                                                                                                                                                                                                                                                                                                                                                                                                                                                                                                                                                                                                                                                                                                                                                                                                                                                                                                                                                                                                                                                                                                                                                                                                                                                                                                                                                                                                                                                                                                                                                       | CERBALLIANCE IDF OUEST SITE LES CLAYES                | CERBA HealthCare                                                                                                                               | Bénédicte Roquebert; Laura Verdurme; Sabine Trombert; Stéphanie Haim-Boukobza                                                                                                                                                                                                                                                                                                                                                                                                                                                                                    |
| EPI_ISL_6957521                                                                                                                                                                                                                                                                                                                                                                                                                                                                                                                                                                                                                                                                                                                                                                                                                                                                                                                                                                                                                                                                                                                                                                                                                                                                                                                                                                                                                                                                                                                                                                                                        | CERBALLIANCE OCCITANIE                                | CERBA HealthCare                                                                                                                               | Bénédicte Roquebert; Laura Verdurme; Sabine Trombert; Stéphanie Haim-Boukobza                                                                                                                                                                                                                                                                                                                                                                                                                                                                                    |
| EPI_ISL_6181495, EPI_ISL_6370457, EPI_ISL_6370460                                                                                                                                                                                                                                                                                                                                                                                                                                                                                                                                                                                                                                                                                                                                                                                                                                                                                                                                                                                                                                                                                                                                                                                                                                                                                                                                                                                                                                                                                                                                                                      | CERBALLIANCE OISE                                     | CERBA HealthCare                                                                                                                               | Bénédicte Roquebert; Laura Verdurme; Sabine Trombert; Stéphanie Haim-Boukobza                                                                                                                                                                                                                                                                                                                                                                                                                                                                                    |
| EPI_ISL_6092917, EPI_ISL_6093016, EPI_ISL_6436745                                                                                                                                                                                                                                                                                                                                                                                                                                                                                                                                                                                                                                                                                                                                                                                                                                                                                                                                                                                                                                                                                                                                                                                                                                                                                                                                                                                                                                                                                                                                                                      | CERBALLIANCE PARIS ET IDF EST                         | CERBA HealthCare                                                                                                                               | Bénédicte Roquebert; Laura Verdurme; Sabine Trombert; Stéphanie Haim-Boukobza                                                                                                                                                                                                                                                                                                                                                                                                                                                                                    |
| EPI_ISL_7267451                                                                                                                                                                                                                                                                                                                                                                                                                                                                                                                                                                                                                                                                                                                                                                                                                                                                                                                                                                                                                                                                                                                                                                                                                                                                                                                                                                                                                                                                                                                                                                                                        | CERBALLIANCE PARIS IDF EST CHARONNE                   | CERBA HealthCare                                                                                                                               | Bénédicte Roquebert; Laura Verdurme; Sabine Trombert; Stéphanie Haim-Boukobza                                                                                                                                                                                                                                                                                                                                                                                                                                                                                    |
| EPI_ISL_7267452                                                                                                                                                                                                                                                                                                                                                                                                                                                                                                                                                                                                                                                                                                                                                                                                                                                                                                                                                                                                                                                                                                                                                                                                                                                                                                                                                                                                                                                                                                                                                                                                        | CERBALLIANCE PARIS IDF EST SITE CLICHY                | CERBA HealthCare                                                                                                                               | Bénédicte Roquebert; Laura Verdurme; Sabine Trombert; Stéphanie Haim-Boukobza                                                                                                                                                                                                                                                                                                                                                                                                                                                                                    |
| EPI_ISL_7044393                                                                                                                                                                                                                                                                                                                                                                                                                                                                                                                                                                                                                                                                                                                                                                                                                                                                                                                                                                                                                                                                                                                                                                                                                                                                                                                                                                                                                                                                                                                                                                                                        | CERBALLIANCE RHONE ALPES                              | CERBA HealthCare                                                                                                                               | Bénédicte Roquebert; Laura Verdurme; Sabine Trombert; Stéphanie Haim-Boukobza                                                                                                                                                                                                                                                                                                                                                                                                                                                                                    |
| EPI_ISL_7267513                                                                                                                                                                                                                                                                                                                                                                                                                                                                                                                                                                                                                                                                                                                                                                                                                                                                                                                                                                                                                                                                                                                                                                                                                                                                                                                                                                                                                                                                                                                                                                                                        | CERBALLIANCE SOMME                                    | CERBA HealthCare                                                                                                                               | Bénédicte Roquebert; Laura Verdurme; Sabine Trombert; Stéphanie Haim-Boukobza                                                                                                                                                                                                                                                                                                                                                                                                                                                                                    |
| EPI_ISL_5194617, EPI_ISL_6227069                                                                                                                                                                                                                                                                                                                                                                                                                                                                                                                                                                                                                                                                                                                                                                                                                                                                                                                                                                                                                                                                                                                                                                                                                                                                                                                                                                                                                                                                                                                                                                                       | CGB laboratorf, a.s.                                  | Institute of Molecular and Translational Medicine / Laboratory of Experimental Medicine, Faculty of Medicine and Dentistry, Palacky University | Barbora Blumová; Hana Jaworek; Kateřina Kubářová; Marián Hajdúch; Rastislav Slavkovský; Vladimíra Koudeláková                                                                                                                                                                                                                                                                                                                                                                                                                                                    |
| EPI_ISL_3267094                                                                                                                                                                                                                                                                                                                                                                                                                                                                                                                                                                                                                                                                                                                                                                                                                                                                                                                                                                                                                                                                                                                                                                                                                                                                                                                                                                                                                                                                                                                                                                                                        | CH ALBI                                               | CHU Purpan - Laboratoire de Virologie - Institut Fédératif de Biologie                                                                         | Boyer P.; Carcenac R.; Ferrer V.; Harter A.; Izopet J.; Jeanne N.; Latour J.; Ranger N.; Tremeaux R.                                                                                                                                                                                                                                                                                                                                                                                                                                                             |
| EPI_ISL_3046532                                                                                                                                                                                                                                                                                                                                                                                                                                                                                                                                                                                                                                                                                                                                                                                                                                                                                                                                                                                                                                                                                                                                                                                                                                                                                                                                                                                                                                                                                                                                                                                                        | CH ARMENTIERES                                        | CHU Lille - Laboratoire de                                                                                                                     | AIT YAHYA Emilie; ALIDJINOU Enagnon Kazali; BOCKET Laurence; CREPIN Michel; DEMAY Christophe; ENGELMANN Ilka; GEFFROY Sandrine; GUIGON Aurélie; LAMBERT Valérie; LAZREK Mouna; NOBILLIAUX Florian; PREVOST Brigitte; TCHANTCHOU NJOSSE                                                                                                                                                                                                                                                                                                                           |

|                                                                                                                       |                                                   |                                                                                                                                            |                                                                                                                                                                                                                                                                                                  |
|-----------------------------------------------------------------------------------------------------------------------|---------------------------------------------------|--------------------------------------------------------------------------------------------------------------------------------------------|--------------------------------------------------------------------------------------------------------------------------------------------------------------------------------------------------------------------------------------------------------------------------------------------------|
| EPI_ISL_3749812                                                                                                       | CH ARRAS                                          | Virologie<br>CHU Lille - Laboratoire de Virologie                                                                                          | YANICK; THUILLIER Caroline; TINEZ Claire<br>AIT YAHYA Emilie; ALIDJINOU Enagnon Kazali; BOCKET Laurence; DEMAY Christophe; ENGELMANN Ilka; GEFFROY Sandrine; GUIGON Aurélie; LAMBERT Valérie; LAZREK Mouna; LOMBART Marion; NOBILLIAUX Florian; THUILLIER Caroline; TINEZ Claire; VEYER Nathalie |
| EPI_ISL_5624485                                                                                                       | CH CAMBRAI                                        | CHU Lille - Laboratoire de Virologie                                                                                                       | AIT YAHYA Emilie; ALIDJINOU Enagnon Kazali; BOCKET Laurence; DEMAY Christophe; ENGELMANN Ilka; GEFFROY Sandrine; GUIGON Aurélie; LAMBERT Valérie; LAZREK Mouna; NOBILLIAUX Florian; PREVOST Brigitte; THUILLIER Caroline; TINEZ Claire                                                           |
| EPI_ISL_1920197                                                                                                       | CH DOUAI                                          | CHU Lille                                                                                                                                  | AIT YAHYA Emilie; ALIDJINOU Enagnon Kazali; BOCKET Laurence; CREPIN Michel; DEMAY Christophe; ENGELMANN Ilka; GEFFROY Sandrine; GUIGON Aurélie; LAMBERT Valérie; LAZREK Mouna; NOBILLIAUX Florian; PREVOST Brigitte; THUILLIER Caroline; TINEZ Claire                                            |
| EPI_ISL_3750649                                                                                                       | CH DUNKERQUE                                      | CHU Lille - Laboratoire de Virologie                                                                                                       | AIT YAHYA Emilie; ALIDJINOU Enagnon Kazali; BOCKET Laurence; DEMAY Christophe; ENGELMANN Ilka; GEFFROY Sandrine; GUIGON Aurélie; LAMBERT Valérie; LAZREK Mouna; LOMBART Marion; NOBILLIAUX Florian; THUILLIER Caroline; TINEZ Claire; VEYER Nathalie                                             |
| EPI_ISL_1577334                                                                                                       | CH Douai                                          | CHU Lille - Laboratoire de Virologie                                                                                                       | AIT YAHYA Emilie; ALIDJINOU Enagnon Kazali; BOCKET Laurence; CREPIN Michel; DEMAY Christophe; ENGELMANN Ilka; GEFFROY Sandrine; GUIGON Aurélie; LAMBERT Valérie; LAZREK Mouna; NOBILLIAUX Florian; PREVOST Brigitte; TCHANTCHOU NJOSSE YANICK; THUILLIER Caroline; TINEZ Claire                  |
| EPI_ISL_420053                                                                                                        | CH Jean de Navarre Laboratoire de Biologie        | National Reference Center for Viruses of Respiratory Infections, Institut Pasteur, Paris                                                   | Angela Brisebarre; Etienne Simon-Lorière; Flora Donati; Marion Barbet; Maud Vanpeene; Mélanie Albert; Méline Bizard; Sylvie Behillili; Sylvie van der Werf; Vincent Enouf                                                                                                                        |
| EPI_ISL_1994016                                                                                                       | CH Lens                                           | CHU Lille                                                                                                                                  | AIT YAHYA Emilie; ALIDJINOU Enagnon Kazali; BOCKET Laurence; CREPIN Michel; DEMAY Christophe; ENGELMANN Ilka; GEFFROY Sandrine; GUIGON Aurélie; LAMBERT Valérie; LAZREK Mouna; NOBILLIAUX Florian; PREVOST Brigitte; THUILLIER Caroline; TINEZ Claire                                            |
| EPI_ISL_3234394                                                                                                       | CH MONTAUBAN                                      | CHU Purpan - Laboratoire de Virologie - Institut Fédératif de Biologie                                                                     | Bulach T.; Donnadieu C.; Izopet J.; Latour J.; Milhes M.; Nicot F.; Ranger N.; Salin G.; Tremaux P.                                                                                                                                                                                              |
| EPI_ISL_3230796                                                                                                       | CH NIORT                                          | CHU Poitiers                                                                                                                               | Agnes BEBY-DEFAUX; Birama N'DIAYE; Caroline MICHAUD; Magali GARCIA; Manon PRAT; Maxime PICHON; Nicolas LEVEQUE; Valentin BON-BARET                                                                                                                                                               |
| EPI_ISL_417997                                                                                                        | CH Porto - H Sto Antonio                          | Instituto Nacional de Saude (INSA)                                                                                                         | Guomar et al                                                                                                                                                                                                                                                                                     |
| EPI_ISL_2501261                                                                                                       | CH ROUBAIX                                        | CHU Lille - Laboratoire de Virologie                                                                                                       | AIT YAHYA Emilie; ALIDJINOU Enagnon Kazali; BOCKET Laurence; CREPIN Michel; DEMAY Christophe; ENGELMANN Ilka; GEFFROY Sandrine; GUIGON Aurélie; LAMBERT Valérie; LAZREK Mouna; NOBILLIAUX Florian; PREVOST Brigitte; TCHANTCHOU NJOSSE YANICK; THUILLIER Caroline; TINEZ Claire                  |
| EPI_ISL_1994019                                                                                                       | CH Roubaix                                        | CHU Lille                                                                                                                                  | AIT YAHYA Emilie; ALIDJINOU Enagnon Kazali; BOCKET Laurence; CREPIN Michel; DEMAY Christophe; ENGELMANN Ilka; GEFFROY Sandrine; GUIGON Aurélie; LAMBERT Valérie; LAZREK Mouna; NOBILLIAUX Florian; PREVOST Brigitte; THUILLIER Caroline; TINEZ Claire                                            |
| EPI_ISL_3527640                                                                                                       | CH SECLIN                                         | CHU Lille - Laboratoire de Virologie                                                                                                       | AIT YAHYA Emilie; ALIDJINOU Enagnon Kazali; BOCKET Laurence; CREPIN Michel; DEMAY Christophe; ENGELMANN Ilka; GEFFROY Sandrine; GUIGON Aurélie; LAMBERT Valérie; LAZREK Mouna; NOBILLIAUX Florian; PREVOST Brigitte; TCHANTCHOU NJOSSE YANICK; THUILLIER Caroline; TINEZ Claire                  |
| EPI_ISL_2501285, EPI_ISL_3527629                                                                                      | CH TOURCOING                                      | CHU Lille - Laboratoire de Virologie                                                                                                       | AIT YAHYA Emilie; ALIDJINOU Enagnon Kazali; BOCKET Laurence; CREPIN Michel; DEMAY Christophe; ENGELMANN Ilka; GEFFROY Sandrine; GUIGON Aurélie; LAMBERT Valérie; LAZREK Mouna; NOBILLIAUX Florian; PREVOST Brigitte; TCHANTCHOU NJOSSE YANICK; THUILLIER Caroline; TINEZ Claire                  |
| EPI_ISL_3204838, EPI_ISL_3204839                                                                                      | CH Tondela Viseu                                  | Instituto Nacional de Saude (INSA) and Institute of Biomedicine (IBIMed), Universidade de Aveiro                                           | Borges et al                                                                                                                                                                                                                                                                                     |
| EPI_ISL_3527682                                                                                                       | CH VALENCIENNES                                   | CHU Lille - Laboratoire de Virologie                                                                                                       | AIT YAHYA Emilie; ALIDJINOU Enagnon Kazali; BOCKET Laurence; CREPIN Michel; DEMAY Christophe; ENGELMANN Ilka; GEFFROY Sandrine; GUIGON Aurélie; LAMBERT Valérie; LAZREK Mouna; NOBILLIAUX Florian; PREVOST Brigitte; TCHANTCHOU NJOSSE YANICK; THUILLIER Caroline; TINEZ Claire                  |
| EPI_ISL_1526363                                                                                                       | CH de GIVORS                                      | CNR Virus des Infections Respiratoires - France SUD                                                                                        | Antonin Bal; Bruno Lina; Bruno Simon; Gregory Destras; Gwendolyne Burfin; Hadrien Regue; Laurence Josset; Martine Valette; Quentin Semanas                                                                                                                                                       |
| EPI_ISL_1013169, EPI_ISL_1013232                                                                                      | CH de Mayotte                                     | National Reference Center for Viruses of Respiratory Infections, Institut Pasteur, Paris                                                   | Angela Brisebarre; Camille Capel; Combe Patrice; Etienne Simon-Lorière; Marion Barbet; Maud Vanpeene; Méline Bizard; Sylvie Behillili; Sylvie van der Werf; Vincent Enouf                                                                                                                        |
| EPI_ISL_418017                                                                                                        | CHMT                                              | Instituto Nacional de Saude (INSA)                                                                                                         | Guomar et al                                                                                                                                                                                                                                                                                     |
| EPI_ISL_418222                                                                                                        | CHRU Bretonneau - Serv. Bacterio-Virol.           | National Reference Center for Viruses of Respiratory Infections, Institut Pasteur, Paris                                                   | Angela Brisebarre; Etienne Simon-Lorière; Fabiana Gambaro; Flora Donati; Julien Mariet; Marion Barbet; Maud Vanpeene; Mélanie Albert; Méline Bizard; Sylvie Behillili; Sylvie van der Werf; Vincent Enouf                                                                                        |
| EPI_ISL_416503, EPI_ISL_416504, EPI_ISL_416512, EPI_ISL_416513                                                        | CHRU Pontchaillou - Laboratoire de Virologie      | National Reference Center for Viruses of Respiratory Infections, Institut Pasteur, Paris                                                   | Angela Brisebarre; Etienne Simon-Lorière; Flora Donati; Gisèle Lagathu; Marion Barbet; Maud Vanpeene; Méline Bizard; Méline Albert; Sylvie Behillili; Sylvie van der Werf; Vincent Enouf                                                                                                         |
| EPI_ISL_1756073                                                                                                       | CHT GASTON BOURRET                                | Department of Virology, Henri Mondor University Hospital, Assistance Publique Hôpitaux de Paris, Université Paris-Est Créteil, INSERM U955 | Alexandre Soulier; Christophe Rodriguez; Elisabeth Trawinski; Guillaume Gricourt; Jean-Michel Pawlotsky; Melissa N'Debi; Slim Fourati; Vanessa Demontant                                                                                                                                         |
| EPI_ISL_418027                                                                                                        | CHTMAD                                            | Instituto Nacional de Saude (INSA)                                                                                                         | Guomar et al                                                                                                                                                                                                                                                                                     |
| EPI_ISL_2004266                                                                                                       | CHTMAD                                            | Instituto Nacional de Saude (INSA) and IBS - Instituto de Investigação e Inovação em Saúde                                                 | Borges et al                                                                                                                                                                                                                                                                                     |
| EPI_ISL_418219                                                                                                        | CHU - Hôpital Cavale Blanche - Labo. de Virologie | National Reference Center for Viruses of Respiratory Infections, Institut Pasteur, Paris                                                   | Angela Brisebarre; Etienne Simon-Lorière; Fabiana Gambaro; Flora Donati; Léa Pilorge; Marion Barbet; Maud Vanpeene; Mélanie Albert; Méline Bizard; Sylvie Behillili; Sylvie van der Werf; Vincent Enouf                                                                                          |
| EPI_ISL_416751, EPI_ISL_416752                                                                                        | CHU Gabriel Montpied                              | CNR Virus des Infections Respiratoires - France SUD                                                                                        | Alexandre; Antonin; Bal; Bouscambert-Duchamp; Brengel-Pesce; Bruno.; Cheynet; Destras; Florence; Gaymard; Gregory; Josset; Karen; Laurence; Lina; Martine; Maude; Morfin-Sherpa; Valette; Valérie                                                                                                |
| EPI_ISL_2143456, EPI_ISL_2143479, EPI_ISL_2646171, EPI_ISL_3046555, EPI_ISL_3370698, EPI_ISL_3527667, EPI_ISL_5644591 | see above                                         | CHU Lille - Laboratoire de Virologie                                                                                                       | AIT YAHYA Emilie; ALIDJINOU Enagnon Kazali; BOCKET Laurence; CREPIN Michel; DEMAY Christophe; ENGELMANN Ilka; GEFFROY Sandrine; GUIGON Aurélie; LAMBERT Valérie; LAZREK Mouna; NOBILLIAUX Florian; PREVOST Brigitte; TCHANTCHOU NJOSSE YANICK; THUILLIER Caroline; TINEZ Claire                  |
| EPI_ISL_1910885, EPI_ISL_1910945, EPI_ISL_1920237, EPI_ISL_1920241                                                    | CHU Lille                                         | CHU Lille                                                                                                                                  | AIT YAHYA Emilie; ALIDJINOU Enagnon Kazali; BOCKET Laurence; CREPIN Michel; DEMAY Christophe; ENGELMANN Ilka; GEFFROY Sandrine; GUIGON Aurélie; LAMBERT Valérie; LAZREK Mouna; NOBILLIAUX Florian; PREVOST Brigitte; THUILLIER Caroline; TINEZ Claire                                            |
| EPI_ISL_1577343, EPI_ISL_1671780, EPI_ISL_2887743                                                                     | CHU Lille                                         | CHU Lille - Laboratoire de Virologie                                                                                                       | AIT YAHYA Emilie; ALIDJINOU Enagnon Kazali; BOCKET Laurence; CREPIN Michel; DEMAY Christophe; ENGELMANN Ilka; GEFFROY Sandrine; GUIGON Aurélie; LAMBERT Valérie; LAZREK Mouna; NOBILLIAUX Florian; PREVOST Brigitte; TCHANTCHOU NJOSSE YANICK; THUILLIER Caroline; TINEZ Claire                  |
| EPI_ISL_3230811                                                                                                       | CHU POITIERS                                      | CHU Poitiers                                                                                                                               | Agnes BEBY-DEFAUX; Birama N'DIAYE; Caroline MICHAUD; Magali GARCIA; Manon PRAT; Maxime PICHON; Nicolas LEVEQUE; Valentin BON-BARET                                                                                                                                                               |
| EPI_ISL_2448624                                                                                                       | CHU Poitiers                                      | CHU Poitiers                                                                                                                               | Agnes BEBY-DEFAUX; Birama N'DIAYE; Caroline MICHAUD; Magali GARCIA; Manon PRAT; Maxime PICHON; Nicolas LEVEQUE; Valentin BON-BARET                                                                                                                                                               |
| EPI_ISL_3039715, EPI_ISL_4549004, EPI_ISL_4549105                                                                     | CHU Pontchaillou                                  | CHU Pontchaillou                                                                                                                           | DE TAYRAC Marie; DENOUAL Florent; ETCHEVERRY Amandine; FEBREAU Christine; GALIBERT Marie Dominique; GROLHIER Claire; JAGLINE Steven; PRONIER Charlotte; QUENET Benjamin; SASSI Mohamed; THIBAUT Vincent                                                                                          |
| EPI_ISL_3234451, EPI_ISL_3234471, EPI_ISL_3234480, EPI_ISL_3234500, EPI_ISL_3234501, EPI_ISL_3234553, EPI_ISL_3393771 | see above                                         | CHU Purpan - Laboratoire de Virologie - Institut Fédératif de Biologie                                                                     | Bulach T.; Donnadieu C.; Izopet J.; Latour J.; Milhes M.; Nicot F.; Ranger N.; Salin G.; Tremaux P.                                                                                                                                                                                              |
| EPI_ISL_1526237                                                                                                       | CHU REUNION                                       | CNR Virus des Infections Respiratoires - France SUD                                                                                        | Antonin Bal; Bruno Lina; Bruno Simon; Gregory Destras; Gwendolyne Burfin; Hadrien Regue; Laurence Josset; Martine Valette; Quentin Semanas                                                                                                                                                       |
| EPI_ISL_1788451                                                                                                       | CHU ST ETIENNE                                    | CNR Virus des Infections Respiratoires - France SUD                                                                                        | Antonin Bal; Bruno Lina; Bruno Simon; Gregory Destras; Gwendolyne Burfin; Hadrien Regue; Laurence Josset; Martine Valette; Quentin Semanas                                                                                                                                                       |
| EPI_ISL_417987                                                                                                        | CHU Sao Joao, Porto                               | Instituto Nacional de Saude (INSA)                                                                                                         | Guomar et al                                                                                                                                                                                                                                                                                     |
| EPI_ISL_860907                                                                                                        | CHU Tours - Virologie                             | National Reference Center for Viruses of Respiratory Infections,                                                                           | Angela Brisebarre; Camille Capel; Etienne Simon-Lorière; Gaudy Graffin Catherine; Marion Barbet; Maud Vanpeene; Méline Bizard; Sylvie Behillili; Sylvie van der Werf; Vincent Enouf                                                                                                              |

|                                                                                                                                                                                                                                                                                                                                                                                                                                                      |                                                                                                                                                               |                                                                                                                                                                                     |                                                                                                                                                                                                                                                                                                                                                                                                                                                                                                                                                                                                                                                                                                                                                                                                                                                                                                                                                                                                                                                                                                                                                                                                                                                                                                                                                          |
|------------------------------------------------------------------------------------------------------------------------------------------------------------------------------------------------------------------------------------------------------------------------------------------------------------------------------------------------------------------------------------------------------------------------------------------------------|---------------------------------------------------------------------------------------------------------------------------------------------------------------|-------------------------------------------------------------------------------------------------------------------------------------------------------------------------------------|----------------------------------------------------------------------------------------------------------------------------------------------------------------------------------------------------------------------------------------------------------------------------------------------------------------------------------------------------------------------------------------------------------------------------------------------------------------------------------------------------------------------------------------------------------------------------------------------------------------------------------------------------------------------------------------------------------------------------------------------------------------------------------------------------------------------------------------------------------------------------------------------------------------------------------------------------------------------------------------------------------------------------------------------------------------------------------------------------------------------------------------------------------------------------------------------------------------------------------------------------------------------------------------------------------------------------------------------------------|
| EPI_ISL_418024                                                                                                                                                                                                                                                                                                                                                                                                                                       | CHUA - Faro                                                                                                                                                   | Institut Pasteur, Paris<br>Instituto Nacional de Saude (INSA)                                                                                                                       | Guimar et al                                                                                                                                                                                                                                                                                                                                                                                                                                                                                                                                                                                                                                                                                                                                                                                                                                                                                                                                                                                                                                                                                                                                                                                                                                                                                                                                             |
| EPI_ISL_417990,<br>EPI_ISL_417991,<br>EPI_ISL_417994,<br>EPI_ISL_417995,<br>EPI_ISL_418010<br>EPI_ISL_417992                                                                                                                                                                                                                                                                                                                                         | CHULC - H Curry Cabral<br><br>CHULC - H D Estefania                                                                                                           | Instituto Nacional de Saude (INSA)                                                                                                                                                  | Guimar et al                                                                                                                                                                                                                                                                                                                                                                                                                                                                                                                                                                                                                                                                                                                                                                                                                                                                                                                                                                                                                                                                                                                                                                                                                                                                                                                                             |
| EPI_ISL_1829116,<br>EPI_ISL_1941790<br>EPI_ISL_1970702                                                                                                                                                                                                                                                                                                                                                                                               | CHUV<br>CHWAPI - SITE NOTRE DAME                                                                                                                              | Laboratory of genomics and metagenomics<br>Institut de Pathologie et Genetique (IPG)                                                                                                | Claire Bertelli; Damien Jacot; Gilbert Greub; Sebastien Aebys; Sébastien Aebys; Trestan Pillonel<br>Jérémie Gras; Pascale Hilbert                                                                                                                                                                                                                                                                                                                                                                                                                                                                                                                                                                                                                                                                                                                                                                                                                                                                                                                                                                                                                                                                                                                                                                                                                        |
| EPI_ISL_2455241<br>EPI_ISL_410486, EPI_ISL_416745, EPI_ISL_416746, EPI_ISL_1313022, EPI_ISL_1313890, EPI_ISL_1526339, EPI_ISL_1695277, EPI_ISL_3205743, EPI_ISL_3206228<br>see above                                                                                                                                                                                                                                                                 | CICESE-BSL3<br>CNR Virus des Infections Respiratoires - France SUD                                                                                            | CICESE-BSL3<br>CNR Virus des Infections Respiratoires - France SUD                                                                                                                  | Cervantes Karla; Galindo Clara and Licea Alexei; Gonzalez Ricardo; Martinez Miguel<br>Alexandre; Antonin; Antonin Bal; Bal; Bouscambert-Duchamp; Brengel-Pesce; Bruno Lina; Bruno Simon; Bruno.; Cheynet; Destras; Florence; Gaymard; Gregory; Gregory Destras; Gwendolyne Burfin; Hadrien Regue; Josset; Karen; Laurence; Laurence Josset; Lina; Martine; Martine Valette; Maude; Morfin-Sherpa; Quentin Semanas; Valette; Valérie                                                                                                                                                                                                                                                                                                                                                                                                                                                                                                                                                                                                                                                                                                                                                                                                                                                                                                                      |
| EPI_ISL_5071201                                                                                                                                                                                                                                                                                                                                                                                                                                      | COLCAN                                                                                                                                                        | Instituto Nacional de Salud-Dirección de Investigación en Salud Pública                                                                                                             | Carlos Franco-Muñoz; Carmen Osorio; Diana Malo; Diego A. Álvarez-Díaz; Diego Andrés Prada; Gerardo Santamaría; Hector Alejandro Ruiz-Moreno; Jhonnatan Reales-González; Jorge Rivera; Juan Camilo Martínez; Julian Naizaque; Katherine Laiton-Donato; Lisseth Pardo; Magdalena Wiesner; Marcela Mercado-Reyes; María T. Herrera-Sepúlveda; Marta Lopez Blanco; Martha Lucia Ospina Martínez; Paola Rojas-Estevéz; Sergio Gomez; Sheryll Corchuelo; Ángela Alarcon Cruz                                                                                                                                                                                                                                                                                                                                                                                                                                                                                                                                                                                                                                                                                                                                                                                                                                                                                   |
| EPI_ISL_416994<br>EPI_ISL_1683853,<br>EPI_ISL_1908254<br>EPI_ISL_6589683                                                                                                                                                                                                                                                                                                                                                                             | COMPLEJO ASISTENCIAL UNIVERSITARIO DE BURGOS<br>CONSEJERÍA DE SANIDAD Y ASUNTOS SOCIALES<br>COVID-19 National Reference Laboratory, Pasteur Institute of Iran | Instituto de Salud Carlos III<br>Instituto de Salud Carlos III                                                                                                                      | G. Hospital: -----; Iglesias-Caballero; M. Camarero S. Pozo F. Casas I. Jiménez P. Jiménez M. Zaballos A. Monzón; M. González-Esguevillas; M. Molinero Calamita; S. Juliá M. Cuesta I. Megias Lobón; S. Varona<br>A. Monzón; F. Casas; GONZALO; I. Jiménez; I.GUTIERREZ AVILA; Iglesias-Caballero; M. Sandomis; P. Zaballos; S. Camarero; S. Cuesta; S. Iglesias-Caballero; S. Pozo; S. Varona; V. Camarero; V. Vázquez-Morón; Vázquez-Morón                                                                                                                                                                                                                                                                                                                                                                                                                                                                                                                                                                                                                                                                                                                                                                                                                                                                                                             |
| EPI_ISL_3274158<br>EPI_ISL_447855                                                                                                                                                                                                                                                                                                                                                                                                                    | CPHL/MOH/EGYPT<br>CSIR-Centre for Cellular and Molecular Biology                                                                                              | CPHL/MOH/EGYPT<br>CSIR-Centre for Cellular and Molecular Biology                                                                                                                    | Wael H. Roshdy/ Mohamed Kamal / Shymaa s. Ahmed/ Ramy Galal/Nancy el guindy/ Amelia nagjub/salma sayed/ Abd Monaem Adel/Galal Mahmoud/Dalia Ramadan/Rabeh .R. El/Shesheny/ Mohamed A Ali/Mohamed Hassany<br>Archana Bharadwaj Siva; Dhiviya Vedagiri; Divya Gupta; Divya Tej Sowpati; Karthik Bharadwaj Tallapaka; Krishnan Harinivas Harshan; Lamuk Zaveri; Namami Gaur; Payel Mukherjee; Priya Singh; Purushotham Vodnala; Rakesh K Mishra; Sakshi Shambhavi; Santosh Kumar Kuncha; Shaguftha Khan; Sofia Banu; Tulasi Nagabandi; Vishal Sah                                                                                                                                                                                                                                                                                                                                                                                                                                                                                                                                                                                                                                                                                                                                                                                                           |
| EPI_ISL_1838489,<br>EPI_ISL_2156851,<br>EPI_ISL_2156987                                                                                                                                                                                                                                                                                                                                                                                              | CSIR-Centre for Cellular and Molecular Biology                                                                                                                | CSIR-Centre for Cellular and Molecular Biology-INSACOG                                                                                                                              | Amreshwar Vodapalli; Ara Sreenivas; Archana Bharadwaj Siva; B Himasri; Blessy B John; Divya Tej Sowpati; Karthik Bharadwaj Tallapaka; Lamuk Zaveri; Onkar Kulkarni; Payel Mukherjee; Rakesh K Mishra; Sharath Chandra Thota; Shreekanth Verma; Sofia Banu; Tulasi Nagabandi; Valli Nagalakshmi Undamata; Viswagithe S L                                                                                                                                                                                                                                                                                                                                                                                                                                                                                                                                                                                                                                                                                                                                                                                                                                                                                                                                                                                                                                  |
| EPI_ISL_1360369,<br>EPI_ISL_1360377,<br>EPI_ISL_1916293,<br>EPI_ISL_1916470<br>EPI_ISL_1393836                                                                                                                                                                                                                                                                                                                                                       | CSIR-National Environmental Engineering Research Institute<br><br>CSK MSWIA Warszawa                                                                          | CSIR-Centre for Cellular and Molecular Biology - INSACOG<br><br>1. National Institute of Public Health - National Institute of Hygiene; 2. Eurofins Genomics Europe Sequencing GmbH | Amreshwar Vodapalli; Ara Sreenivas; B Himasri; Divya Tej Sowpati; Karthik Bharadwaj Tallapaka; Krishna Khairnar; Lamuk Zaveri; Onkar Kulkarni; Rakesh K Mishra; Sharath Chandra Thota; Shreekanth Verma; Sofia Banu; Viswagithe S L<br>ECDC COVID-19 WGS support team; Eurofins Genomics Europe Sequencing Team; Gierczyński Rafal; Sadkowska-Todys Malgorzata; Wolkowicz Tomasz; Zacharczuk Katarzyna                                                                                                                                                                                                                                                                                                                                                                                                                                                                                                                                                                                                                                                                                                                                                                                                                                                                                                                                                   |
| EPI_ISL_536206                                                                                                                                                                                                                                                                                                                                                                                                                                       | CSSS de la Minganie                                                                                                                                           | Laboratoire de santé publique du Québec                                                                                                                                             | Guillaume Bourque; Ioannis Ragoussis; Jesse Shapiro; Mark Lathrop and Michel Roger on behalf of the CoVSeQ research group; Sandrine Moreira                                                                                                                                                                                                                                                                                                                                                                                                                                                                                                                                                                                                                                                                                                                                                                                                                                                                                                                                                                                                                                                                                                                                                                                                              |
| EPI_ISL_418812,<br>EPI_ISL_418813<br>EPI_ISL_935883,<br>EPI_ISL_979271<br>EPI_ISL_2156210                                                                                                                                                                                                                                                                                                                                                            | Cadham Provincial Laboratory<br><br>Cadham Provincial laboratory<br>Cagayan Valley Medical Center Molecular Laboratory                                        | National Microbiology Laboratory<br><br>National Microbiology Laboratory (NML)<br>Philippine Genome Center                                                                          | Anna Majer; David Alexander; Grace Seo; Jared Bullard; Kerry Dust; Matthew Gilmour; Morag Graham; Natalie Knox; Nathalie Bastien; Paul Van Caesele; Philip Mabon; Shari Tyson; Timothy Booth; Yan Li<br>Anna Majer; Anneliese Landgraff; CanCOGeN's metadata curation team; Darian Hole; David Alexander; Elsie Grudski; Gary Van Domselaar; Grace Seo; Jared Bullard; Jennifer Tanner; Kerry Dust; Kirsten Biggar; Madison Chapel; Morag Graham; Natalie Knox; Nathalie Bastien; Paul Van Caesele; Philip Mabon; Public Health Agency of Canada CanCOGeN team; Rhiannon Huzarewicz; Russell Mandes; Shari Tyson; Timothy Booth; Yan Li<br>Alethea R. de Guzman; Anna Ong-Lim; Arienne A. Zamora; Asia Louisa U. Chong; Benedict A. Maralit; Candice Francheska B. Tambaono; Carlo M. Lapid; Celia Carlos; Devon Ray Pacial; Edsel Maurice Salvaña; El King D. Morado; Eva Maria Cutiongco-de la Paz; Francis A. Tablizo; Irish Coleen A. Asin; Jaime C. Montoya; Jan Michael C. Yap; Jo-Hannah S. Llamas; John Q. Wong; Joshua Gregor A. Dizon; Juan Antonio R. Magalang; Karol Sophia Agape R. Padilla; Kenneth M. Kim; Kris P. Punayan; Marc Edsel C. Ayes; Marc jerrone R. Castro; Maria Rosario Singh-Vergeire and Cynthia P. Saloma; Maria Sofia L. Yangzon; Marissa Alejandria; Razel Nikka M. Hao; Rianna Patricia S. Cruz; Sheila Mae M. Araiza |
| EPI_ISL_408008                                                                                                                                                                                                                                                                                                                                                                                                                                       | California Department of Health                                                                                                                               | Pathogen Discovery, Respiratory Viruses Branch, Division of Viral Diseases, Centers for Disease Control and Prevention                                                              | Anna Uehara; Brett L. Whitaker; Brian Lynch; Clinton Paden; Janna' R. Murray; Jing Zhang; Krista Queen; Lijuan Wang; Senthil Kumar K. Sakthivel; Shifaq Kamili; Stephen Lindstrom; Susan I. Gerber; Suxiang Tong; Xiaoyan Lu; Yan Li; Ying Tao                                                                                                                                                                                                                                                                                                                                                                                                                                                                                                                                                                                                                                                                                                                                                                                                                                                                                                                                                                                                                                                                                                           |
| EPI_ISL_413558,<br>EPI_ISL_413559,<br>EPI_ISL_413561,<br>EPI_ISL_413924,<br>EPI_ISL_413931                                                                                                                                                                                                                                                                                                                                                           | California Department of Public Health                                                                                                                        | Chiu Laboratory, University of California, San Francisco                                                                                                                            | Chao-Yang Pan; Debra A. Wadford; Hugo Guevara; Scot Federman; Wei Gu; Xianding Deng; and Charles Y. Chiu                                                                                                                                                                                                                                                                                                                                                                                                                                                                                                                                                                                                                                                                                                                                                                                                                                                                                                                                                                                                                                                                                                                                                                                                                                                 |
| EPI_ISL_406036,<br>EPI_ISL_410044                                                                                                                                                                                                                                                                                                                                                                                                                    | California Department of Public Health                                                                                                                        | Pathogen Discovery, Respiratory Viruses Branch, Division of Viral Diseases, Centers for Disease Control and Prevention                                                              | Anna Uehara; Brett L. Whitaker; Brian Lynch; Clinton R. Paden; Janna' R. Murray; Jing Zhang; Krista Queen; Lijuan Wang; Senthil Kumar K. Sakthivel; Shifaq Kamili; Stephen Lindstrom; Susan I. Gerber; Suxiang Tong; Xiaoyan Lu; Yan Li; Ying Tao                                                                                                                                                                                                                                                                                                                                                                                                                                                                                                                                                                                                                                                                                                                                                                                                                                                                                                                                                                                                                                                                                                        |
| EPI_ISL_412862                                                                                                                                                                                                                                                                                                                                                                                                                                       | California Department of Public Health                                                                                                                        | Pathogen Discovery, Respiratory Viruses Branch, Division of Viral Diseases, Centers for Disease Control and Prevention                                                              | Anna Uehara; Brett L. Whitaker; Brian Lynch; Clinton R. Paden; Haibin Wang; Janna' R. Murray; Jasmine Padilla; Jing Zhang; Justin Lee; Krista Queen; Lijuan Wang; Senthil Kumar K. Sakthivel; Shifaq Kamili; Stephen Lindstrom; Susan I. Gerber; Suxiang Tong; Xiaoyan Lu; Yan Li; Ying Tao                                                                                                                                                                                                                                                                                                                                                                                                                                                                                                                                                                                                                                                                                                                                                                                                                                                                                                                                                                                                                                                              |
| EPI_ISL_1663357                                                                                                                                                                                                                                                                                                                                                                                                                                      | Capital hospital, Bhubaneswar                                                                                                                                 | Institute of Life Sciences - INSACOG                                                                                                                                                | Ajay Parida; Amol M. Kanampalliar; Arup Ghosh; Atimukta Jha; INSACOG Consortium; Punit Prasad; Rajeeb Swain; Rupesh Dash; Safal Walla; Shifu Aggarwal; Sunil K. Raghav                                                                                                                                                                                                                                                                                                                                                                                                                                                                                                                                                                                                                                                                                                                                                                                                                                                                                                                                                                                                                                                                                                                                                                                   |
| EPI_ISL_5063103,<br>EPI_ISL_5734663,<br>EPI_ISL_6332820,<br>EPI_ISL_6945433                                                                                                                                                                                                                                                                                                                                                                          | Center for Virology, Medical University of Vienna                                                                                                             | Berghaler laboratory, CeMM Research Center for Molecular Medicine of the Austrian Academy of Sciences                                                                               | Andreas Berghaler; Anna Schedl; Bekir Erguner; Benedikt Agerer; Christoph Bock; Fabian Amman; Jan Laine; Lukas Endler; Maelle Le Moing; Martin Senekowitsch; Matthew Thornton; Michael Schuster; Michelle Chan; Petr Triska; Thomas Penz                                                                                                                                                                                                                                                                                                                                                                                                                                                                                                                                                                                                                                                                                                                                                                                                                                                                                                                                                                                                                                                                                                                 |
| EPI_ISL_413488,<br>EPI_ISL_414499,<br>EPI_ISL_414505,<br>EPI_ISL_414509,<br>EPI_ISL_417458,<br>EPI_ISL_417460                                                                                                                                                                                                                                                                                                                                        | Center of Medical Microbiology, Virology, and Hospital Hygiene, University of Duesseldorf                                                                     | Center of Medical Microbiology, Virology, and Hospital Hygiene, University of Duesseldorf                                                                                           | Alexander Dilthey; Andreas Walker; Björn-Erik Jensen; Daniel Strelow; Detlef Kindgen-Milles; Jörg Timm; Klaus Pfeffer; Malte Kohns Vasconcelos; Marcel Andree; Ortwin Adams; Sandra Hauka; Tina Senff; Tobias Wienemann; Torsten Feldt; Torsten Houwaart                                                                                                                                                                                                                                                                                                                                                                                                                                                                                                                                                                                                                                                                                                                                                                                                                                                                                                                                                                                                                                                                                                 |
| EPI_ISL_1760250,<br>EPI_ISL_1760284<br>EPI_ISL_1843984,<br>EPI_ISL_2108590                                                                                                                                                                                                                                                                                                                                                                           | Centers for Disease Control and Prevention, Dengue Branch<br>Centogene; Dr. Bauer Laboratoriums GmbH                                                          | Centers for Disease Control and Prevention, Dengue Branch<br>Robert Koch Institute                                                                                                  | Betzabel Flores; Gabriela Paz-Bailey; Gilberto A. Santiago; Glenda Gonzalez; Jorge L. Munoz-Jordan; Keyla Charriez                                                                                                                                                                                                                                                                                                                                                                                                                                                                                                                                                                                                                                                                                                                                                                                                                                                                                                                                                                                                                                                                                                                                                                                                                                       |
| EPI_ISL_2178570,<br>EPI_ISL_3260203,<br>EPI_ISL_3260289                                                                                                                                                                                                                                                                                                                                                                                              | Centracare Laboratory Services                                                                                                                                | Minnesota Department of Health, Public Health Laboratory                                                                                                                            | Alexandra Lorentz; Jacob Garfin; Matt Plumb; and Xiong Wang                                                                                                                                                                                                                                                                                                                                                                                                                                                                                                                                                                                                                                                                                                                                                                                                                                                                                                                                                                                                                                                                                                                                                                                                                                                                                              |
| EPI_ISL_3236188                                                                                                                                                                                                                                                                                                                                                                                                                                      | Central Health Laboratory                                                                                                                                     | Central Health Laboratory ,Victoria Hospital, Candos,Ministry of Health and Wellness, Mauritius                                                                                     | Bahadoor BS; Jannoo N; Manraj SS; Mathur H; Ramuth M; Sonoo J; Sujewon C                                                                                                                                                                                                                                                                                                                                                                                                                                                                                                                                                                                                                                                                                                                                                                                                                                                                                                                                                                                                                                                                                                                                                                                                                                                                                 |
| EPI_ISL_1583705, EPI_ISL_3255057, EPI_ISL_3255062, EPI_ISL_3255084, EPI_ISL_3255093, EPI_ISL_3255097, EPI_ISL_3255101, EPI_ISL_3255109, EPI_ISL_3255110, EPI_ISL_3255158, EPI_ISL_3255184, EPI_ISL_3255188, EPI_ISL_3255207, EPI_ISL_3255214, EPI_ISL_3255220, EPI_ISL_3255221, EPI_ISL_3255234, EPI_ISL_3255238, EPI_ISL_3255253, EPI_ISL_3255257, EPI_ISL_3255269, EPI_ISL_3255281, EPI_ISL_3266081, EPI_ISL_3266082, EPI_ISL_3266089<br>see above | Central Public Health Laboratory - LACEN -Bahia, Salvador, Brazil                                                                                             | Central Public Health Laboratory - LACEN -Bahia, Salvador, Brazil                                                                                                                   | Arabela Leal; Breno Dominguez; Felicidade Pereira; Jaqueline Gomes; Luciana Oliveira; Luiz Alcantara; Marcela Gómez; Marta Giovanetti; Patrícia Cajado; Stephane Tosta; Vagner Fonseca; Vanessa Nardy                                                                                                                                                                                                                                                                                                                                                                                                                                                                                                                                                                                                                                                                                                                                                                                                                                                                                                                                                                                                                                                                                                                                                    |

|                                                                                                                                                                                                                                                                                                 |                                                                                                                                                                                                                                                                                                                                                                                                                                                                      |                                                                                                                                                                                                           |                                                                                                                                                                                                                                                                                                                                                                                                                                                                                                                                                                                                                                                                                                                                                                                                                                                                                                                                                                                                                                                                                                                                                                                                                                                                                                                                                                                                                                                                                                                                                                                                                                                                                                                                                       |
|-------------------------------------------------------------------------------------------------------------------------------------------------------------------------------------------------------------------------------------------------------------------------------------------------|----------------------------------------------------------------------------------------------------------------------------------------------------------------------------------------------------------------------------------------------------------------------------------------------------------------------------------------------------------------------------------------------------------------------------------------------------------------------|-----------------------------------------------------------------------------------------------------------------------------------------------------------------------------------------------------------|-------------------------------------------------------------------------------------------------------------------------------------------------------------------------------------------------------------------------------------------------------------------------------------------------------------------------------------------------------------------------------------------------------------------------------------------------------------------------------------------------------------------------------------------------------------------------------------------------------------------------------------------------------------------------------------------------------------------------------------------------------------------------------------------------------------------------------------------------------------------------------------------------------------------------------------------------------------------------------------------------------------------------------------------------------------------------------------------------------------------------------------------------------------------------------------------------------------------------------------------------------------------------------------------------------------------------------------------------------------------------------------------------------------------------------------------------------------------------------------------------------------------------------------------------------------------------------------------------------------------------------------------------------------------------------------------------------------------------------------------------------|
| EPI_ISL_1910406                                                                                                                                                                                                                                                                                 | Centre Hospitalier Billom                                                                                                                                                                                                                                                                                                                                                                                                                                            | CHU Clermont-Ferrand, service de virologie                                                                                                                                                                | Bisseux Maxime; Combes Patricia; Henquell Cécile; Mirand Audrey                                                                                                                                                                                                                                                                                                                                                                                                                                                                                                                                                                                                                                                                                                                                                                                                                                                                                                                                                                                                                                                                                                                                                                                                                                                                                                                                                                                                                                                                                                                                                                                                                                                                                       |
| EPI_ISL_414627, EPI_ISL_414629, EPI_ISL_414636, EPI_ISL_414638, EPI_ISL_415654, EPI_ISL_416496, EPI_ISL_416497, EPI_ISL_418218, EPI_ISL_418223, EPI_ISL_418224, EPI_ISL_418228, EPI_ISL_418231, EPI_ISL_418236, EPI_ISL_418237, EPI_ISL_418238, EPI_ISL_418239                                  | see above                                                                                                                                                                                                                                                                                                                                                                                                                                                            | National Reference Center for Viruses of Respiratory Infections, Institut Pasteur, Paris                                                                                                                  | Angela Brisebarre; Etienne Simon-Lorière; Fabiana Gambaro; Flora Donati; Flora Donati Vincent Enouf; Marion Barbet; Maud Vanpeene; Mélanie Albert; Méline Bizard; Méline Albert; Raulin Olivia; Sylvie Behillili; Sylvie van der Werf; Vincent Enouf                                                                                                                                                                                                                                                                                                                                                                                                                                                                                                                                                                                                                                                                                                                                                                                                                                                                                                                                                                                                                                                                                                                                                                                                                                                                                                                                                                                                                                                                                                  |
| EPI_ISL_1853285                                                                                                                                                                                                                                                                                 | Centre Hospitalier Paul Ardiér                                                                                                                                                                                                                                                                                                                                                                                                                                       | CHU Clermont-Ferrand, service de virologie                                                                                                                                                                | Bisseux Maxime; Combes Patricia; Henquell Cécile; Mirand Audrey                                                                                                                                                                                                                                                                                                                                                                                                                                                                                                                                                                                                                                                                                                                                                                                                                                                                                                                                                                                                                                                                                                                                                                                                                                                                                                                                                                                                                                                                                                                                                                                                                                                                                       |
| EPI_ISL_1483729, EPI_ISL_1731498                                                                                                                                                                                                                                                                | Centre Hospitalier RIOM                                                                                                                                                                                                                                                                                                                                                                                                                                              | CHU Clermont-Ferrand, service de virologie                                                                                                                                                                | Bisseux Maxime; Combes Patricia; Henquell Cécile; Mirand Audrey                                                                                                                                                                                                                                                                                                                                                                                                                                                                                                                                                                                                                                                                                                                                                                                                                                                                                                                                                                                                                                                                                                                                                                                                                                                                                                                                                                                                                                                                                                                                                                                                                                                                                       |
| EPI_ISL_418418, EPI_ISL_418419                                                                                                                                                                                                                                                                  | Centre Hospitalier Saint Joseph Saint Luc                                                                                                                                                                                                                                                                                                                                                                                                                            | CNR Virus des Infections Respiratoires - France SUD                                                                                                                                                       | Alexandre Gaymard; Antonin Bal; Bruno Lina; Carine Moustaud; Florence Morfin-Sherpa; Gregory Destras; Gwendolynne Burfin; Laurence Josset; Martine Valette; Maude Bouscambert-Duchamp; Raphaëlle Lamy; Solenne Brun                                                                                                                                                                                                                                                                                                                                                                                                                                                                                                                                                                                                                                                                                                                                                                                                                                                                                                                                                                                                                                                                                                                                                                                                                                                                                                                                                                                                                                                                                                                                   |
| EPI_ISL_1406580, EPI_ISL_1483709, EPI_ISL_1483717, EPI_ISL_1483739, EPI_ISL_2214900, EPI_ISL_2789835, EPI_ISL_2789861                                                                                                                                                                           | see above                                                                                                                                                                                                                                                                                                                                                                                                                                                            | CHU Clermont-Ferrand, service de virologie                                                                                                                                                                | Bisseux Maxime; Combes Patricia; Henquell Cécile; Mirand Audrey                                                                                                                                                                                                                                                                                                                                                                                                                                                                                                                                                                                                                                                                                                                                                                                                                                                                                                                                                                                                                                                                                                                                                                                                                                                                                                                                                                                                                                                                                                                                                                                                                                                                                       |
| EPI_ISL_5062263, EPI_ISL_7284828                                                                                                                                                                                                                                                                | Centre Hospitalier Universitaire de Rouen Laboratoire de Virologie                                                                                                                                                                                                                                                                                                                                                                                                   | Centre Hospitalier Universitaire de Rouen Laboratoire de Virologie                                                                                                                                        | Alice Moisan; Fabienne De Oliveira; Marie Leoz                                                                                                                                                                                                                                                                                                                                                                                                                                                                                                                                                                                                                                                                                                                                                                                                                                                                                                                                                                                                                                                                                                                                                                                                                                                                                                                                                                                                                                                                                                                                                                                                                                                                                                        |
| EPI_ISL_416757, EPI_ISL_417340                                                                                                                                                                                                                                                                  | Centre Hospitalier de Bourg en Bresse                                                                                                                                                                                                                                                                                                                                                                                                                                | CNR Virus des Infections Respiratoires - France SUD                                                                                                                                                       | Alexandre; Alexandre Gaymard; Antonin; Antonin Bal; Bal; Bouscambert-Duchamp; Brengel-Pesce; Bruno Lina; Bruno.; Carine Moustaud; Cheynet; Destras; Florence; Florence Morfin-Sherpa; Gaymard; Gregory; Gregory Destras; Gwendolynne Burfin; Josset; Karen; Laurence; Laurence Josset; Lina; Martine; Martine Valette; Maude; Maude Bouscambert-Duchamp; Morfin-Sherpa; Raphaëlle Lamy; Solenne Brun; Valette; Valérie                                                                                                                                                                                                                                                                                                                                                                                                                                                                                                                                                                                                                                                                                                                                                                                                                                                                                                                                                                                                                                                                                                                                                                                                                                                                                                                                |
| EPI_ISL_416749, EPI_ISL_418414                                                                                                                                                                                                                                                                  | Centre Hospitalier de Valence                                                                                                                                                                                                                                                                                                                                                                                                                                        | CNR Virus des Infections Respiratoires - France SUD                                                                                                                                                       | Alexandre; Alexandre Gaymard; Antonin; Antonin Bal; Bal; Bouscambert-Duchamp; Brengel-Pesce; Bruno Lina; Bruno.; Carine Moustaud; Cheynet; Destras; Florence; Florence Morfin-Sherpa; Gaymard; Gregory; Gregory Destras; Gwendolynne Burfin; Josset; Karen; Laurence; Laurence Josset; Lina; Martine; Martine Valette; Maude; Maude Bouscambert-Duchamp; Morfin-Sherpa; Raphaëlle Lamy; Solenne Brun; Valette; Valérie                                                                                                                                                                                                                                                                                                                                                                                                                                                                                                                                                                                                                                                                                                                                                                                                                                                                                                                                                                                                                                                                                                                                                                                                                                                                                                                                |
| EPI_ISL_418412                                                                                                                                                                                                                                                                                  | Centre Hospitalier des Vals d'Ardeche                                                                                                                                                                                                                                                                                                                                                                                                                                | CNR Virus des Infections Respiratoires - France SUD                                                                                                                                                       | Alexandre Gaymard; Antonin Bal; Bruno Lina; Carine Moustaud; Florence Morfin-Sherpa; Gregory Destras; Gwendolynne Burfin; Laurence Josset; Martine Valette; Maude Bouscambert-Duchamp; Raphaëlle Lamy; Solenne Brun                                                                                                                                                                                                                                                                                                                                                                                                                                                                                                                                                                                                                                                                                                                                                                                                                                                                                                                                                                                                                                                                                                                                                                                                                                                                                                                                                                                                                                                                                                                                   |
| EPI_ISL_1790080                                                                                                                                                                                                                                                                                 | Centre Pasteur Annexe de Garoua                                                                                                                                                                                                                                                                                                                                                                                                                                      | Institut Pasteur de Dakar                                                                                                                                                                                 | Carniel Elisabeth; Dia Ndongo; Diagne Moussa Moïse; Diallo Amadou; Diop Mamadou; Faye Ousmane; Loucoubar Cheikh; Ndiaye Ndack; Njoum Richard; Sal Amadou Alpha; Sankhe Safietou                                                                                                                                                                                                                                                                                                                                                                                                                                                                                                                                                                                                                                                                                                                                                                                                                                                                                                                                                                                                                                                                                                                                                                                                                                                                                                                                                                                                                                                                                                                                                                       |
| EPI_ISL_2036091                                                                                                                                                                                                                                                                                 | Centre de Recherches Médicales de Lambaréné (CERMEL)                                                                                                                                                                                                                                                                                                                                                                                                                 | Centre de Recherches Médicales de Lambaréné (CERMEL)                                                                                                                                                      | Bertrand Lell and Ayola Akim Adegnikra; Georjein Nguema Ondo; Géodion Prince Manouanga; Jean Bernard Lekana-Douki; Joël-Fleury Djoba Siawaya; Moustapha Nzamba Maloum; Rodrigue Bikangui; Samira Zoä Assoumou; Srinivas reddy Pallerla; Steffen Borrmann; Thirumalaisamy P. Velavan                                                                                                                                                                                                                                                                                                                                                                                                                                                                                                                                                                                                                                                                                                                                                                                                                                                                                                                                                                                                                                                                                                                                                                                                                                                                                                                                                                                                                                                                   |
| EPI_ISL_978537, EPI_ISL_2968035                                                                                                                                                                                                                                                                 | Centre de Virologie des Maladies infectueuses Tropicales                                                                                                                                                                                                                                                                                                                                                                                                             | Functional Genomic Platform UATRS-biology, CNRST                                                                                                                                                          | ; Abdelilah LARAQUI; Abderrazzak Rfaki; Ahmed REGGAD; Elmoustafa BENAÏSSA; Elmoustafa EL FAHIME; Farida HILLALI; Hemlali Moushine; Hicham EL ANNAZ; Idriss-Amine LAHLOU; Khalid ENNIBI; Marouane HELLLOUL; Mly Abdelaziz ELALAOUI; Mostafa ELOUENNASS; Nadia TOUIL; Nadia Touil; Rachid ABI; Rida TAGAJDID; Safae ELKOCHE; Sanaa ALAOUI-Amine; Tahar BAJJOU; Yassine SEKHSOKH; Youssef AKHOUD; Zohour KASMY                                                                                                                                                                                                                                                                                                                                                                                                                                                                                                                                                                                                                                                                                                                                                                                                                                                                                                                                                                                                                                                                                                                                                                                                                                                                                                                                           |
| EPI_ISL_1717088                                                                                                                                                                                                                                                                                 | Centre for Dengue Research and AICBU, Department of Immunology and Molecular Medicine                                                                                                                                                                                                                                                                                                                                                                                | Centre for Dengue Research and AICBU, Department of Immunology and Molecular Medicine                                                                                                                     | Chandima Jewandara; Deshni Jayathilaka; Dinuka Ariyaratne; Diyanath Ranasinghe; Gathsaurie Neelika Malavige; Laksiri Gomes; Tibutus Thanesh Pramanayagam                                                                                                                                                                                                                                                                                                                                                                                                                                                                                                                                                                                                                                                                                                                                                                                                                                                                                                                                                                                                                                                                                                                                                                                                                                                                                                                                                                                                                                                                                                                                                                                              |
| EPI_ISL_1000247, EPI_ISL_1310359, EPI_ISL_1730844, EPI_ISL_1730900                                                                                                                                                                                                                              | Centre for Enzyme Innovation, University of Portsmouth / Translational Research Laboratory, Portsmouth Hospitals NHS Trust                                                                                                                                                                                                                                                                                                                                           | COVID-19 Genomics UK (COG-UK) Consortium                                                                                                                                                                  | Angela Beckett; Christopher Fearn; Kate Cook; Katie Lovesson; Salman Goudarzi; Samuel Robson; Scott Elliott; Sharon Glaysher                                                                                                                                                                                                                                                                                                                                                                                                                                                                                                                                                                                                                                                                                                                                                                                                                                                                                                                                                                                                                                                                                                                                                                                                                                                                                                                                                                                                                                                                                                                                                                                                                          |
| EPI_ISL_3182622, EPI_ISL_3182837, EPI_ISL_3182864                                                                                                                                                                                                                                               | Centre for Enzyme Innovation, University of Portsmouth / Translational Research Laboratory, Portsmouth Hospitals NHS Trust / Hampshire Hospitals NHS Foundation Trust / Bournemouth University / University Hospitals Dorset NHS Foundation Trust / Brighton and Sussex University Hospitals NHS Trust / Dartford and Gravesham NHS Trust / Isle of Wight NHS Trust / Maidstone and Tunbridge Wells NHS Trust / University Hospital Southampton NHS Foundation Trust | COVID-19 Genomics UK (COG-UK) Consortium                                                                                                                                                                  | Adhyana Mahanama; Allyson Lloyd; Andrew Butt; Angela Beckett; Anibolina Castigador; Anna Mantzouratou; Anoop Chauhan; Ben Macklin; Benjamin Cogger; Buddhini Samaraweera; Cassandra Malone; Christopher Fearn; Claire Thomas; Dorian Crudgington; Eleri Wilson-Davies; Emanuela Pelosi; Emily Macnaughton; Helen Umpleby; Helen Wheeler; Jacqui Priotto; Jonnie Seymour; Karen Withell; Kate Cook; Katie Lovesson; Kelly Bicknell; Kevin Tucker; Kordo Saeed; Liz Sheridan; Magdalena Barrow; Matthew Harvey; Mohammed Hassan-Ibrahim; Nathan Moore; Nick Cortes; Rachael Jeremiah; Robert Impey; Salman Goudarzi; Samirakthon Raupova; Samuel Robson; Sarah Buchan; Sarah Jeremiah; Sarah Wyllie; Scott Elliott; Sharon Glaysher; Siona Silvieri; Stephen Apin; Stephen Kidd; Thea Sass                                                                                                                                                                                                                                                                                                                                                                                                                                                                                                                                                                                                                                                                                                                                                                                                                                                                                                                                                              |
| EPI_ISL_413596, EPI_ISL_413599, EPI_ISL_413600                                                                                                                                                                                                                                                  | Centre for Infectious Diseases and Microbiology - Public Health                                                                                                                                                                                                                                                                                                                                                                                                      | NSW Health Pathology - Institute of Clinical Pathology and Medical Research; Westmead Hospital; University of Sydney                                                                                      | Carter I; Chen SC; Eden J-S; Gall; Gray K; Holmes EC; Kok J and Dwyer DE for the 2019-nCoV Study Group*; Lam C; M; Maddocks S; O'Sullivan MV; Rahman H; Rockett R; Sintchenko V; Timms; V                                                                                                                                                                                                                                                                                                                                                                                                                                                                                                                                                                                                                                                                                                                                                                                                                                                                                                                                                                                                                                                                                                                                                                                                                                                                                                                                                                                                                                                                                                                                                             |
| EPI_ISL_407893, EPI_ISL_413213, EPI_ISL_413594, EPI_ISL_413595                                                                                                                                                                                                                                  | Centre for Infectious Diseases and Microbiology Laboratory Services                                                                                                                                                                                                                                                                                                                                                                                                  | NSW Health Pathology - Institute of Clinical Pathology and Medical Research; Westmead Hospital; University of Sydney                                                                                      | ; A; Alicia; Carter I; Chen SC; Eden J-S; Gall; Gray K; Holmes EC; Kok J and Dwyer DE for the 2019-nCoV Study Group; Kok J and Dwyer DE for the 2019-nCoV Study Group*; Lam C; M; Maddocks S; O'Sullivan MV; Rahman H; Rockett R; Sintchenko V; Timms; V                                                                                                                                                                                                                                                                                                                                                                                                                                                                                                                                                                                                                                                                                                                                                                                                                                                                                                                                                                                                                                                                                                                                                                                                                                                                                                                                                                                                                                                                                              |
| EPI_ISL_417383, EPI_ISL_417384, EPI_ISL_417385, EPI_ISL_417388, EPI_ISL_417389, EPI_ISL_417391, EPI_ISL_417396, EPI_ISL_417397, EPI_ISL_417398, EPI_ISL_417400, EPI_ISL_417402, EPI_ISL_417403, EPI_ISL_417405, EPI_ISL_417408, EPI_ISL_417409, EPI_ISL_417411, EPI_ISL_417412                  | see above                                                                                                                                                                                                                                                                                                                                                                                                                                                            | NSW Health Pathology - Institute of Clinical Pathology and Medical Research; Westmead Hospital; University of Sydney                                                                                      | Arnott A; Arnott A and Sadsad R for the 2019-nCoV Study Group; Carter I, Chen SC; Chen SC and Maddocks S for the 2019-nCoV Study Group; Dwyer DE; Dwyer DE and Rockett R for the 2019-nCoV Study Group; Eden J-S; Eden J-S and Lam C for the 2019-nCoV Study Group; Gall M; Gray K; Gray K and Timms V for the 2019-nCoV Study Group; Holmes EC; Holmes EC and O'Sullivan MV for the 2019-nCoV Study Group; Kok J; Kok J and Dwyer DE for the 2019-nCoV Study Group; Lam C; Maddocks S; O'Sullivan MV; O'Sullivan MV and Sintchenko V for the 2019-nCoV Study Group; Rahman H; Rahman H and Holmes EC for the 2019-nCoV Study Group; Rockett R; Rockett R and Eden J-S for the 2019-nCoV Study Group; Sadsad R; Sadsad R and Carter I for the 2019-nCoV Study Group; Sintchenko V; Sintchenko V and Chen SC for the 2019-nCoV Study Group; Timms V; Timms V and Gall M for the 2019-nCoV Study Group                                                                                                                                                                                                                                                                                                                                                                                                                                                                                                                                                                                                                                                                                                                                                                                                                                                  |
| EPI_ISL_413597                                                                                                                                                                                                                                                                                  | Centre for Infectious Diseases and Microbiology- Public Health                                                                                                                                                                                                                                                                                                                                                                                                       | NSW Health Pathology - Institute of Clinical Pathology and Medical Research; Westmead Hospital; University of Sydney                                                                                      | Carter I; Chen SC; Eden J-S; Gall; Gray K; Holmes EC; Kok J and Dwyer DE for the 2019-nCoV Study Group*; Lam C; M; Maddocks S; O'Sullivan MV; Rahman H; Rockett R; Sintchenko V; Timms; V                                                                                                                                                                                                                                                                                                                                                                                                                                                                                                                                                                                                                                                                                                                                                                                                                                                                                                                                                                                                                                                                                                                                                                                                                                                                                                                                                                                                                                                                                                                                                             |
| EPI_ISL_5146251, EPI_ISL_5146286                                                                                                                                                                                                                                                                | Centro Diagnóstico Clínico CDC                                                                                                                                                                                                                                                                                                                                                                                                                                       | Laboratorio de Biología Molecular y Biotecnología - Universidad Tecnológica de Pereira                                                                                                                    | Augusto Zuluaga-Velez; Fredy A. Tabares-Villa; Juan C. Sepulveda; Juan D. Anacona-Montilla; Marcela Orjuela-Rodríguez                                                                                                                                                                                                                                                                                                                                                                                                                                                                                                                                                                                                                                                                                                                                                                                                                                                                                                                                                                                                                                                                                                                                                                                                                                                                                                                                                                                                                                                                                                                                                                                                                                 |
| EPI_ISL_3277553                                                                                                                                                                                                                                                                                 | Centro Medico ABC                                                                                                                                                                                                                                                                                                                                                                                                                                                    | Instituto Nacional de Medicina Genomica                                                                                                                                                                   | Cedro-Tanda A; Cesar Lara; Daniel Aguirre M; Escobar-Arazola MA; Herrera-Montalvo LA.; Hidalgo-Miranda A; Jacomine Reyes-Carrasco; Mendoza-Vargas A; Munguia-Garza P; Ramirez-Vega O; Rangel-DeLeon D; Reyes-Grajeda JP; Roxana Trejo-González                                                                                                                                                                                                                                                                                                                                                                                                                                                                                                                                                                                                                                                                                                                                                                                                                                                                                                                                                                                                                                                                                                                                                                                                                                                                                                                                                                                                                                                                                                        |
| EPI_ISL_1531910, EPI_ISL_2231405                                                                                                                                                                                                                                                                | Centro de Diagnostico COVID-19 UABC Tijuana                                                                                                                                                                                                                                                                                                                                                                                                                          | Andersen lab at Scripps Research                                                                                                                                                                          | German Ibarra; Jonathan Vincent Baena; Jorge Luis Jimenez Niebla; Manuel Sanchez Alavez; Oscar Efen Zazueta Fierro; SEARCH Alliance San Diego with Idanya Rubi Serafin Higuera                                                                                                                                                                                                                                                                                                                                                                                                                                                                                                                                                                                                                                                                                                                                                                                                                                                                                                                                                                                                                                                                                                                                                                                                                                                                                                                                                                                                                                                                                                                                                                        |
| EPI_ISL_1661979, EPI_ISL_2671699, EPI_ISL_2942437, EPI_ISL_2942455, EPI_ISL_2942724, EPI_ISL_2942738, EPI_ISL_3805299, EPI_ISL_3805328, EPI_ISL_3805404, EPI_ISL_3805409, EPI_ISL_4550015, EPI_ISL_4550053, EPI_ISL_6775596, EPI_ISL_6775599, EPI_ISL_6775607, EPI_ISL_6775623, EPI_ISL_6775715 | see above                                                                                                                                                                                                                                                                                                                                                                                                                                                            | Unidad de Genomica Avanzada                                                                                                                                                                               | ; Alejandra García-Gasca; Alejandra Hernandez-Teran; Alejandro Sanchez-Flores; Alfredo Herrera-Estrella; Alicia Ocana-Mondragon; Alicia Ocaña-Mondragon; Andreu Comas-Garcia; Angel Gustavo Salas-Lais; Antonio Loza Roman; Bernardo Martinez-Miguel; Blanca Taboada; Brenda Irasema Maldonado-Meza; Bruno Gomez-Gil; Carla Ivon Herrera-Najera; Carlos F. Arias; Celia Boukadida; Celida Duque Molina; Celida Martínez- Rodríguez; Clara Esperanza Santacruz-Tinoco; Concepcion Grajales-Muniz; Concepcion Grajales-Muniz; Consorcio Mexicano de Vigilancia Genomica (CoVGen-Mex). Authors (in alphabetical order): Julio Elias Alvarado-Yaah; Cristobal Chaidze-Quiroz; Daniel Fregoso-Rueda; Daniel Lira Morales; Eduardo Becerri-Vargas; Fernando Fontove-Herrera; Fidencio Mejia-Nepomuceno; Francisco Pulido; Gloria Elena Espinosa-Ayala; Gloria Maria Molina-Salinas; Gloria Vazquez; Hector Esteban Paz-Juarez; Hector Montoya-Fuentes; Helen Haydee Fernanda Ramirez-Plascencia; Irvin Gonzalez-Lopez; Jean Pierre Gonzalez; Jesus Hernandez; Joel Armando Vazquez-Perez.; Jorge Salas-Hernandez; Jose Antonio Enciso-Moreno; Jose Arturo Martinez-Orozco; Jose Esteban Muñoz-Medina; Jose Esteban Muñoz-Medina; Jose de Jesus Nunez-Contreras; Jose de Jesus Nuñez-Contreras; Juan Bautista Chale-Dzul; Julissa Enciso-Ibarra; Luis Alberto Ochoa-Carrera; Margarita Matias-Florentino; Maria Guadalupe Santiago-Mauricio; Maria Guadalupe de Jesus Mireles-Rivera; Mario Mujica-Sanchez; Marissa Perez-Garcia; Nelly Selem-Mojica; Pavel Isa; Ricardo Ciria Merce; Ricardo Grande; Rosa Maria Gutierrez Rios; Santiago Avila-Rios; Selene Zarate; Susana Lopez; Veronica Mata-Haro; Victor Eduardo Garcia-Arias; Victor Hugo Borja-Aburto |
| EPI_ISL_2942505, EPI_ISL_2942788, EPI_ISL_3568767, EPI_ISL_3805438, EPI_ISL_4549870, EPI_ISL_6775526                                                                                                                                                                                            | Centro de Investigacion Biomedica del Noreste (CIBIN)                                                                                                                                                                                                                                                                                                                                                                                                                | Unidad de Genomica Avanzada                                                                                                                                                                               | ; Alejandra García-Gasca; Alejandra Hernandez-Teran; Alejandro Sanchez-Flores; Alfredo Herrera-Estrella; Alicia Ocaña-Mondragon; Alicia Ocaña-Mondragon; Andreu Comas-Garcia; Angel Gustavo Salas-Lais; Antonio Loza Roman; Bernardo Martinez-Miguel; Blanca Taboada; Brenda Irasema Maldonado-Meza; Bruno Gomez-Gil; Carla Ivon Herrera-Najera; Carlos F. Arias; Celia Boukadida; Celida Duque Molina; Celida Martínez- Rodríguez; Clara Esperanza Santacruz-Tinoco; Concepcion Grajales-Muñoz; Concepcion Grajales-Muniz; Consorcio Mexicano de Vigilancia Genomica (CoVGen-Mex). Authors (in alphabetical order): Julio Elias Alvarado-Yaah; Cristobal Chaidze-Quiroz; Daniel Fregoso-Rueda; Daniel Lira Morales; Eduardo Becerri-Vargas; Fernando Fontove-Herrera; Fidencio Mejia-Nepomuceno; Francisco Pulido; Gloria Elena Espinosa-Ayala; Gloria Maria Molina-Salinas; Gloria Vazquez; Hector Esteban Paz-Juarez; Hector Montoya-Fuentes; Helen Haydee Fernanda Ramirez-Plascencia; Irvin Gonzalez-Lopez; Jean Pierre Gonzalez; Jesus Hernandez; Joel Armando Vazquez-Perez.; Jorge Salas-Hernandez; Jose Antonio Enciso-Moreno; Jose Arturo Martinez-Orozco; Jose Esteban Muñoz-Medina; Jose Esteban Muñoz-Medina; Jose de Jesus Nuñez-Contreras; Jose de Jesus Nuñez-Contreras; Juan Bautista Chale-Dzul; Julissa Enciso-Ibarra; Luis Alberto Ochoa-Carrera; Margarita Matias-Florentino; Maria Guadalupe Santiago-Mauricio; Maria Guadalupe de Jesus Mireles-Rivera; Mario Mujica-Sanchez; Marissa Perez-Garcia; Nelly Selem-Mojica; Pavel Isa; Ricardo Ciria Merce; Ricardo Grande; Rosa Maria Gutierrez Rios; Santiago Avila-Rios; Selene Zarate; Susana Lopez; Veronica Mata-Haro; Victor Eduardo Garcia-Arias; Victor Hugo Borja-Aburto |
| EPI_ISL_941967                                                                                                                                                                                                                                                                                  | Centro de Investigaciones en Microbiología y Biotecnología-UR (CIMBIUR), Facultad de Ciencias Naturales, Universidad del Rosario, Bogotá, Colombia                                                                                                                                                                                                                                                                                                                   | Centro de Investigaciones en Microbiología y Biotecnología-UR (CIMBIUR), Facultad de Ciencias Naturales, Universidad del Rosario, Bogotá, Colombia Icahn School of Medicine at Mount Sinai, New York, USA | Adriana van de Guchte; Alberto Paniz-Mondolfi; Ana S. Gonzalez-Reiche; Carolina Flórez; Carolina Hernandez; Emilia Mia Sordillo; Hala Alejei Alshammary; Harna van Bakel; Jaaeyeta Dutta; Juan David Ramirez; Luz Helena Patiño; Marina Muñoz; Matthew M. Hernandez; Nathalia Ballesteros; Sergio Gomez; Viviana Simon; Zenab Khan                                                                                                                                                                                                                                                                                                                                                                                                                                                                                                                                                                                                                                                                                                                                                                                                                                                                                                                                                                                                                                                                                                                                                                                                                                                                                                                                                                                                                    |
| EPI_ISL_1351561                                                                                                                                                                                                                                                                                 | Centro de Investigaci3n Biom3dica de Occidente (CIBO)                                                                                                                                                                                                                                                                                                                                                                                                                | Unidad de Genomica Avanzada                                                                                                                                                                               | Alejandro Sanchez-Flores; Alfredo Herrera-Estrella; Alicia Ocana-Mondragon; Angel Gustavo Salas-Lais; Bernardo Martinez-Miguel; Blanca Taboada; Brenda Irasema Maldonado-Meza; Carla Ivon Herrera-Najera; Carlos F. Arias; Celia Boukadida; Clara Esperanza Santacruz-Tinoco; Concepcion Grajales-Muniz; Consorcio Mexicano de Vigilancia Genomica (CoVGen-Mex). Authors (in alphabetical order): Julio Elias Alvarado-Yaah; Fernando Fontove-Herrera; Francisco Pulido; Gloria Elena Espinosa-Ayala; Gloria Maria Molina-Salinas; Gloria Vazquez; Hector Esteban Paz-Juarez; Hector Montoya-Fuentes; Helen Haydee Fernanda Ramirez-Plascencia; Jorge Ivan Salinal-Nevarez; Jose Antonio Enciso-Moreno; Jose Esteban Muñoz-Medina; Jose de Jesus Nunez-Contreras; Juan Bautista Chale-Dzul; Luis Alberto Ochoa-Carrera; Margarita Matias-Florentino; Maria Guadalupe Santiago-Mauricio; Maria Guadalupe de Jesus Mireles-Rivera; Nelly Selem-Mojica; Pavel Isa; Ricardo Grande; Santiago Avila-Rios; Victor Hugo Borja-Aburto                                                                                                                                                                                                                                                                                                                                                                                                                                                                                                                                                                                                                                                                                                                         |

|                                                                                                                                                                                                            |                                                                                                                                                                                                                        |                                                                                                                       |                                                                                                                                                                                                                                                                                                                                                                                                                                                                                                                                                                                                                                                                                                                                                                                                                                                                                                                                                                                                                                                                                                                                                                                                                                                                                                                                                                                                                                                                                                                                                                                                                                                                                                                                                                                                                                     |
|------------------------------------------------------------------------------------------------------------------------------------------------------------------------------------------------------------|------------------------------------------------------------------------------------------------------------------------------------------------------------------------------------------------------------------------|-----------------------------------------------------------------------------------------------------------------------|-------------------------------------------------------------------------------------------------------------------------------------------------------------------------------------------------------------------------------------------------------------------------------------------------------------------------------------------------------------------------------------------------------------------------------------------------------------------------------------------------------------------------------------------------------------------------------------------------------------------------------------------------------------------------------------------------------------------------------------------------------------------------------------------------------------------------------------------------------------------------------------------------------------------------------------------------------------------------------------------------------------------------------------------------------------------------------------------------------------------------------------------------------------------------------------------------------------------------------------------------------------------------------------------------------------------------------------------------------------------------------------------------------------------------------------------------------------------------------------------------------------------------------------------------------------------------------------------------------------------------------------------------------------------------------------------------------------------------------------------------------------------------------------------------------------------------------------|
| EPI_ISL_2091140, EPI_ISL_2091145, EPI_ISL_2091258, EPI_ISL_4299688, EPI_ISL_4299708, EPI_ISL_5193928, EPI_ISL_6227415                                                                                      | Centro de Investigación Biomédica de Occidente (CIBO)                                                                                                                                                                  | Centro de Investigación en Enfermedades Infecciosas (CIEIN), Instituto Nacional de Enfermedades Respiratorias (INER)  | Alejandra García-Gasca; Alejandra Hernández-Terán; Alejandro Sánchez-Flores; Alejandro Sánchez-Flores; Alfredo Herrera-Estrella; Alicia Ocaña-Mondragón; Andreu Comas-García; Angel Gustavo Salas-Lais; Antonio Loza Román; Bernardo Martínez-Miguel; Blanca Taboada; Brenda Irasema Maldonado-Meza; Bruno Gómez-Gil; Carla Ivón Herrera-Najera; Carlos F. Arias; Celia Boukadida; Clara Esperanza Santacruz-Tinoco; Concepción Grajales-Muñiz; Consorcio Mexicano de Vigilancia Genómica (CoVGen-Mex). Authors (in alphabetical order): Julio Elias Alvarado-Yaah; Cristóbal Cháidez-Quiróz; Célida Duque Molina; Célida Martínez-Rodríguez; Daniel Fregoso-Rueda; Daniel Lira Morales; Eduardo Becerrii-Vargas; Eduardo Rivera-Martínez; Fernando Fontove-Herrera; Fidencio Mejía-Nepomuceno; Francisco Pulido; Gabriel Chavira-Trujillo; Gloria Elena Espinosa-Ayala; Gloria María Molina-Salinas; Gloria Vazquez; Hector Esteban Paz-Juárez; Hector Montoya-Fuentes; Helen Haydee Fernanda Ramirez-Plascencia; Irvin González-López; Jean Pierre González; Jesús Hernández; Joel Armando Vázquez-Pérez.; Jorge Salas-Hernández; José Antonio Enciso-Moreno; José Arturo Martínez-Orozco; José Esteban Muñoz-Medina; José de Jesús Nuñez-Contreras; Juan Bautista Chale-Dzul; Julissa Enciso-Ibarra; Kathia Elizabeth Tapia-Díaz; Luis Alberto Ochoa-Carrera; Margarita Matias-Florentino; Mario Mújica-Sánchez; Marissa Perez-Garcia; María Eugenia Jiménez-Corona; María Guadalupe Santiago-Mauricio; María Guadalupe de Jesús Mireles-Rivera; Nelly Sélem-Mojica; Pavel Isa; Ricardo Ciria Merce; Ricardo Grande; Rosa María Gutiérrez Rios; Rosario Vazquez-Larios; Santiago Ávila-Ríos; Selene Zárate; Susana Lopez; Verónica Mata-Haro; Victor Eduardo García-Arias; Victor Eduardo García-Arias; Victor Hugo Borja-Aburto |
| EPI_ISL_3347877, EPI_ISL_4006633, EPI_ISL_4006657, EPI_ISL_4878660, EPI_ISL_5936880                                                                                                                        | Centro de Investigación Biomédica de Occidente (CIBO)                                                                                                                                                                  | Instituto de Biotecnología de la UNAM                                                                                 | ; Alejandra García-Gasca; Alejandra Hernández-Terán; Alejandro Sánchez-Flores; Alfredo Herrera-Estrella; Alicia Ocaña-Mondragón; Andreu Comas-García; Angel Gustavo Salas-Lais; Antonio Loza Román; Bernardo Martínez-Miguel; Blanca Taboada; Brenda Irasema Maldonado-Meza; Bruno Gómez-Gil; Carla Ivón Herrera-Najera; Carlos F. Arias; Celia Boukadida; Clara Esperanza Santacruz-Tinoco; Concepción Grajales-Muñiz; Consorcio Mexicano de Vigilancia Genómica (CoVGen-Mex). Authors (in alphabetical order): Julio Elias Alvarado-Yaah; Cristóbal Cháidez-Quiróz; Célida Duque Molina; Célida Martínez-Rodríguez; Daniel Fregoso-Rueda; Daniel Lira Morales; Eduardo Becerrii-Vargas; Fernando Fontove-Herrera; Fidencio Mejía-Nepomuceno; Francisco Pulido; Gloria Elena Espinosa-Ayala; Gloria María Molina-Salinas; Gloria Vazquez; Hector Esteban Paz-Juárez; Hector Montoya-Fuentes; Helen Haydee Fernanda Ramirez-Plascencia; Irvin González-López; Jean Pierre González; Jesús Hernández; Joel Armando Vázquez-Pérez.; Jorge Salas-Hernández; José Antonio Enciso-Moreno; José Arturo Martínez-Orozco; José Esteban Muñoz-Medina; José de Jesús Nuñez-Contreras; Juan Bautista Chale-Dzul; Julissa Enciso-Ibarra; Kathia Elizabeth Tapia-Díaz; Luis Alberto Ochoa-Carrera; Margarita Matias-Florentino; Mario Mújica-Sánchez; Marissa Perez-Garcia; María Guadalupe Santiago-Mauricio; María Guadalupe de Jesús Mireles-Rivera; Nelly Sélem-Mojica; Pavel Isa; Ricardo Ciria Merce; Ricardo Grande; Rosa María Gutiérrez Rios; Santiago Ávila-Ríos; Selene Zárate; Susana Lopez; Verónica Mata-Haro; Victor Eduardo García-Arias; Victor Hugo Borja-Aburto                                                                                                                                                               |
| EPI_ISL_2402145                                                                                                                                                                                            | Centro de Investigación Biomédica de Occidente (CIBO)                                                                                                                                                                  | Unidad de Genómica Avanzada                                                                                           | Alejandra Sanchez-Flores; Alfredo Herrera-Estrella; Alicia Ocaña-Mondragón; Angel Gustavo Salas-Lais; Bernardo Martínez-Miguel; Blanca Taboada; Brenda Irasema Maldonado-Meza; Carla Ivon Herrera-Najera; Carlos F. Arias; Celia Boukadida; Clara Esperanza Santacruz-Tinoco; Concepción Grajales-Muñiz; Consorcio Mexicano de Vigilancia Genómica (CoVGen-Mex). Authors (in alphabetical order): Julio Elias Alvarado-Yaah; Fernando Fontove-Herrera; Francisco Pulido; Gloria Elena Espinoza-Ayala; Gloria María Molina-Salinas; Gloria Vazquez; Hector Esteban Paz-Juarez; Hector Montoya-Fuentes; Helen Haydee Fernanda Ramirez-Plascencia; Jorge Ivan Salinal-Nevarez; José Antonio Enciso-Moreno; José Esteban Munoz-Medina; Jose de Jesus Nunez-Contreras; Juan Bautista Chale-Dzul; Luis Alberto Ochoa-Carrera; Margarita Matias-Florentino; Maria Guadalupe Santiago-Mauricio; Maria Guadalupe de Jesus Mireles-Rivera; Nelly Selem-Mojica; Pavel Isa; Ricardo Grande; Santiago Ávila-Ríos; Victor Hugo Borja-Aburto                                                                                                                                                                                                                                                                                                                                                                                                                                                                                                                                                                                                                                                                                                                                                                                                       |
| EPI_ISL_2091182, EPI_ISL_2091211, EPI_ISL_4299512, EPI_ISL_4299541, EPI_ISL_5194023, EPI_ISL_5194241, EPI_ISL_6227210, EPI_ISL_6227574                                                                     | Centro de Investigación Biomédica del Noreste (CIBIN)                                                                                                                                                                  | Centro de Investigación en Enfermedades Infecciosas (CIEIN), Instituto Nacional de Enfermedades Respiratorias (INER)  | Alejandra García-Gasca; Alejandra Hernández-Terán; Alejandro Sánchez-Flores; Alejandro Sánchez-Flores; Alfredo Herrera-Estrella; Alicia Ocaña-Mondragón; Andreu Comas-García; Angel Gustavo Salas-Lais; Antonio Loza Román; Bernardo Martínez-Miguel; Blanca Taboada; Brenda Irasema Maldonado-Meza; Bruno Gómez-Gil; Carla Ivón Herrera-Najera; Carlos F. Arias; Celia Boukadida; Clara Esperanza Santacruz-Tinoco; Concepción Grajales-Muñiz; Consorcio Mexicano de Vigilancia Genómica (CoVGen-Mex). Authors (in alphabetical order): Julio Elias Alvarado-Yaah; Fernando Fontove-Herrera; Francisco Pulido; Gloria Elena Espinoza-Ayala; Gloria María Molina-Salinas; Gloria Vazquez; Hector Esteban Paz-Juárez; Hector Montoya-Fuentes; Helen Haydee Fernanda Ramirez-Plascencia; Irvin González-López; Jean Pierre González; Jesús Hernández; Joel Armando Vázquez-Pérez.; Jorge Salas-Hernández; José Antonio Enciso-Moreno; José Arturo Martínez-Orozco; José Esteban Muñoz-Medina; José de Jesús Nuñez-Contreras; Juan Bautista Chale-Dzul; Julissa Enciso-Ibarra; Kathia Elizabeth Tapia-Díaz; Luis Alberto Ochoa-Carrera; Margarita Matias-Florentino; Mario Mújica-Sánchez; Marissa Perez-Garcia; María Eugenia Jiménez-Corona; María Guadalupe Santiago-Mauricio; María Guadalupe de Jesús Mireles-Rivera; Nelly Sélem-Mojica; Pavel Isa; Ricardo Ciria Merce; Ricardo Grande; Rosa María Gutiérrez Rios; Rosario Vazquez-Larios; Santiago Ávila-Ríos; Selene Zárate; Susana Lopez; Verónica Mata-Haro; Victor Eduardo García-Arias; Victor Hugo Borja-Aburto                                                                                                                                                                                                                                                          |
| EPI_ISL_1585390                                                                                                                                                                                            | Centro de Investigación Biomédica del Noreste (CIBIN)                                                                                                                                                                  | Instituto Nacional de Enfermedades Respiratorias (INER); Centro de Investigación en Enfermedades Infecciosas (CIEIN)  | Alejandra Sanchez-Flores; Alfredo Herrera-Estrella; Alicia Ocaña-Mondragón; Angel Gustavo Salas-Lais; Bernardo Martínez-Miguel; Blanca Taboada; Brenda Irasema Maldonado-Meza; Carla Ivón Herrera-Najera; Carlos F. Arias; Celia Boukadida; Clara Esperanza Santacruz-Tinoco; Concepción Grajales-Muñiz; Consorcio Mexicano de Vigilancia Genómica (CoVGen-Mex). Authors (in alphabetical order): Julio Elias Alvarado-Yaah; Fernando Fontove-Herrera; Francisco Pulido; Gloria Elena Espinosa-Ayala; Gloria María Molina-Salinas; Gloria Vazquez; Hector Esteban Paz-Juárez; Hector Montoya-Fuentes; Helen Haydee Fernanda Ramirez-Plascencia; Jorge Ivan Salinal-Nevarez; José Antonio Enciso-Moreno; José Esteban Muñoz-Medina; Jose de Jesus Nunez-Contreras; Juan Bautista Chale-Dzul; Luis Alberto Ochoa-Carrera; Margarita Matias-Florentino; Maria Guadalupe Santiago-Mauricio; Maria Guadalupe de Jesus Mireles-Rivera; Nelly Selem-Mojica; Pavel Isa; Ricardo Grande; Santiago Ávila-Ríos; Victor Hugo Borja-Aburto                                                                                                                                                                                                                                                                                                                                                                                                                                                                                                                                                                                                                                                                                                                                                                                                       |
| EPI_ISL_3347664, EPI_ISL_5936857, EPI_ISL_6863386                                                                                                                                                          | Centro de Investigación Biomédica del Noreste (CIBIN)                                                                                                                                                                  | Instituto de Biotecnología de la UNAM                                                                                 | ; Alejandra García-Gasca; Alejandra Hernández-Terán; Alejandro Sánchez-Flores; Alfredo Herrera-Estrella; Alicia Ocaña-Mondragón; Andreu Comas-García; Angel Gustavo Salas-Lais; Antonio Loza Román; Bernardo Martínez-Miguel; Blanca Taboada; Brenda Irasema Maldonado-Meza; Bruno Gómez-Gil; Carla Ivón Herrera-Najera; Carlos F. Arias; Celia Boukadida; Clara Esperanza Santacruz-Tinoco; Concepción Grajales-Muñiz; Consorcio Mexicano de Vigilancia Genómica (CoVGen-Mex). Authors (in alphabetical order): Julio Elias Alvarado-Yaah; Fernando Fontove-Herrera; Francisco Pulido; Gloria Elena Espinoza-Ayala; Gloria María Molina-Salinas; Gloria Vazquez; Hector Esteban Paz-Juárez; Hector Montoya-Fuentes; Helen Haydee Fernanda Ramirez-Plascencia; Irvin González-López; Jean Pierre González; Jesús Hernández; Joel Armando Vázquez-Pérez.; Jorge Salas-Hernández; José Antonio Enciso-Moreno; José Arturo Martínez-Orozco; José Esteban Muñoz-Medina; José de Jesús Nuñez-Contreras; Juan Bautista Chale-Dzul; Julissa Enciso-Ibarra; Kathia Elizabeth Tapia-Díaz; Luis Alberto Ochoa-Carrera; Margarita Matias-Florentino; Mario Mújica-Sánchez; Marissa Perez-Garcia; María Eugenia Jiménez-Corona; María Guadalupe Santiago-Mauricio; María Guadalupe de Jesús Mireles-Rivera; Nelly Sélem-Mojica; Pavel Isa; Ricardo Ciria Merce; Ricardo Grande; Rosa María Gutiérrez Rios; Santiago Ávila-Ríos; Selene Zárate; Susana Lopez; Verónica Mata-Haro; Victor Eduardo García-Arias; Victor Hugo Borja-Aburto                                                                                                                                                                                                                                                                                                          |
| EPI_ISL_2401947, EPI_ISL_2402005                                                                                                                                                                           | Centro de Investigación Biomédica del Noreste (CIBIN)                                                                                                                                                                  | Unidad de Genómica Avanzada                                                                                           | Alejandra Sanchez-Flores; Alfredo Herrera-Estrella; Alicia Ocaña-Mondragón; Angel Gustavo Salas-Lais; Bernardo Martínez-Miguel; Blanca Taboada; Brenda Irasema Maldonado-Meza; Carla Ivon Herrera-Najera; Carlos F. Arias; Celia Boukadida; Clara Esperanza Santacruz-Tinoco; Concepción Grajales-Muniz; Consorcio Mexicano de Vigilancia Genómica (CoVGen-Mex). Authors (in alphabetical order): Julio Elias Alvarado-Yaah; Fernando Fontove-Herrera; Francisco Pulido; Gloria Elena Espinoza-Ayala; Gloria María Molina-Salinas; Gloria Vazquez; Hector Esteban Paz-Juarez; Hector Montoya-Fuentes; Helen Haydee Fernanda Ramirez-Plascencia; Jorge Ivan Salinal-Nevarez; Jose Antonio Enciso-Moreno; Jose Esteban Munoz-Medina; Jose de Jesus Nunez-Contreras; Juan Bautista Chale-Dzul; Luis Alberto Ochoa-Carrera; Margarita Matias-Florentino; Maria Guadalupe Santiago-Mauricio; Maria Guadalupe de Jesus Mireles-Rivera; Nelly Selem-Mojica; Pavel Isa; Ricardo Grande; Santiago Ávila-Ríos; Victor Hugo Borja-Aburto                                                                                                                                                                                                                                                                                                                                                                                                                                                                                                                                                                                                                                                                                                                                                                                                       |
| EPI_ISL_5687709, EPI_ISL_5687716, EPI_ISL_5687777, EPI_ISL_5687834, EPI_ISL_5687865, EPI_ISL_5736638, EPI_ISL_5736667, EPI_ISL_5736668                                                                     | Centro di riferimento regionale per le emergenze microbiologiche (CREEM)                                                                                                                                               | Laboratory of Medical Microbiology, University of Antwerp                                                             | Basil Britto Xavier; Evelina Tacconelli; Maddalena Giannelia; Mathias Smet; Matilda Berckel; Surbhi Malhotra-Kumar                                                                                                                                                                                                                                                                                                                                                                                                                                                                                                                                                                                                                                                                                                                                                                                                                                                                                                                                                                                                                                                                                                                                                                                                                                                                                                                                                                                                                                                                                                                                                                                                                                                                                                                  |
| EPI_ISL_1590336                                                                                                                                                                                            | Centrálná Laboratorija; Eurofins Genomics Europe Sequencing GmbH                                                                                                                                                       | Riga East University Hospital-National Microbiology Reference Laboratory; Eurofins Genomics Europe Sequencing GmbH    | Arzu Alguieva; Diána Dusacka; Dárta Púpola; Ilva Pole; Jana Osite; Reinis Navgravs; Reinis Zeltmatis; Sergejs Niksins; Stella Lapina; Ģirts Šķenders                                                                                                                                                                                                                                                                                                                                                                                                                                                                                                                                                                                                                                                                                                                                                                                                                                                                                                                                                                                                                                                                                                                                                                                                                                                                                                                                                                                                                                                                                                                                                                                                                                                                                |
| EPI_ISL_7138889, EPI_ISL_5914959, EPI_ISL_5914904, EPI_ISL_406862                                                                                                                                          | Cerballiance Cote D'Azur Site Strasbourg<br>Cerballiance LBM de St Marcel<br>Cerballiance LBM la pomme<br>Charité Universitätsmedizin Berlin, Institute of Virology; Institut für Mikrobiologie der Bundeswehr, Munich | CERBA HealthCare<br>CERBA HealthCare<br>CERBA HealthCare<br>Charité Universitätsmedizin Berlin, Institute of Virology | Bénédicte Roquebert; Laura Verdurme; Sabine Trombert; Stéphanie Haim-Boukobza<br>Bénédicte Roquebert; Laura Verdurme; Sabine Trombert; Stéphanie Haim-Boukobza<br>Bénédicte Roquebert; Laura Verdurme; Sabine Trombert; Stéphanie Haim-Boukobza<br>Barbara Mühlemann; Christian Drosten; Julia Schneider; Markus Antwerpen; Roman Wölfel; Talitha Veith; Victor M Corman                                                                                                                                                                                                                                                                                                                                                                                                                                                                                                                                                                                                                                                                                                                                                                                                                                                                                                                                                                                                                                                                                                                                                                                                                                                                                                                                                                                                                                                            |
| EPI_ISL_3191180, EPI_ISL_3191192, EPI_ISL_3191193, EPI_ISL_3191200, EPI_ISL_3191243, EPI_ISL_3191257, EPI_ISL_3191274, EPI_ISL_3191282, EPI_ISL_3191657, EPI_ISL_3191658, EPI_ISL_3191738, EPI_ISL_3191743 | Chiba Prefectural Institute of Public Health                                                                                                                                                                           | Division of Virology and Zoology, Chiba Prefectural Institute of Public Health                                        | Akihiro Takemura; Haruna Nishijima; Kentaro Itokawa; Makoto Kuroda; Mari Ohta; Masakatsu Taira; Masanori Hashino; Mika Takeuchi; Rina Tanaka; Shigenori Sato; Tsuyoshi Sekizuka; Yuji Hanada; Yuki Fujinuma                                                                                                                                                                                                                                                                                                                                                                                                                                                                                                                                                                                                                                                                                                                                                                                                                                                                                                                                                                                                                                                                                                                                                                                                                                                                                                                                                                                                                                                                                                                                                                                                                         |
| EPI_ISL_686674, EPI_ISL_686711, EPI_ISL_686714, EPI_ISL_686717, EPI_ISL_1127164, EPI_ISL_1431661, EPI_ISL_1929539                                                                                          | Chiba Prefectural Institute of Public Health                                                                                                                                                                           | Pathogen Genomics Center, National Institute of Infectious Diseases                                                   | Kentaro Itokawa; Makoto Kuroda; Masanori Hashino; Rina Tanaka; Tsuyoshi Sekizuka                                                                                                                                                                                                                                                                                                                                                                                                                                                                                                                                                                                                                                                                                                                                                                                                                                                                                                                                                                                                                                                                                                                                                                                                                                                                                                                                                                                                                                                                                                                                                                                                                                                                                                                                                    |
| EPI_ISL_1278720, EPI_ISL_1278770, EPI_ISL_2111041, EPI_ISL_2124293, EPI_ISL_1849214, EPI_ISL_414579                                                                                                        | Clalit Health Services Laboratories, Israel<br>Clemenshospital - Alexianer Clemenshospital Munster<br>Clemenshospital - Alexianer Clemenshospital MÄVAnster<br>Clinica Alemana de Santiago, Chile                      | Stern Lab<br>Robert Koch Institute<br>Robert Koch Institute<br>Instituto de Salud Publica de Chile                    | Stern Lab<br>Alejandra Acevedo; Andrés E. Castillo; Bárbara Parra; Carolina Tambley; Gabriel Leal; Gisselle Barra; Jaime Lagos; Javier Tognarelli; Jorge Fernández; Loredana Arata; Patricia Bustos; Paz Tapia; Rodrigo Fasce; Soledad Ulloa; Winston Andrade                                                                                                                                                                                                                                                                                                                                                                                                                                                                                                                                                                                                                                                                                                                                                                                                                                                                                                                                                                                                                                                                                                                                                                                                                                                                                                                                                                                                                                                                                                                                                                       |
| EPI_ISL_3242707, EPI_ISL_3242726, EPI_ISL_3242743, EPI_ISL_414580                                                                                                                                          | Clinica INDISA<br>Clinica Santa Maria, Santiago, Chile                                                                                                                                                                 | "Facultad de Ciencias de la Vida, UNAB"<br>Instituto de Salud Publica de Chile                                        | "Claudio Meneses; Ariel Orellana"; Claudio Olmos; Daniel Leon; Dayan Sanhueza; Eduardo Castro; Gonzalo Campaña; Macarena Bastias; Paola Pidal; Ricardo Yusta; Sebastian Wolter; Susana Saez; Victor Monreal; Waldo Diaz<br>Alejandra Acevedo; Andrés E. Castillo; Bárbara Parra; Carolina Tambley; Gabriel Leal; Gisselle Barra; Jaime Lagos; Javier Tognarelli; Jorge Fernández; Loredana Arata; Patricia Bustos; Paz Tapia; Rodrigo Fasce; Soledad Ulloa; Winston Andrade                                                                                                                                                                                                                                                                                                                                                                                                                                                                                                                                                                                                                                                                                                                                                                                                                                                                                                                                                                                                                                                                                                                                                                                                                                                                                                                                                         |
| EPI_ISL_902974                                                                                                                                                                                             | Clinical Diagnostics Laboratory, Diagnostic & Experimental Pathology, Lilly Research Laboratories                                                                                                                      | Clinical Diagnostics Laboratory, Diagnostic & Experimental Pathology, Lilly Research Laboratories                     | Andrew Schade; Angie Fulford; Erin Wray; Jeff Fill; Joe Oakley; John Calley; John McElwee; Leslie O'Neill Reising; Mayuri Vaidya; Pat Finnegan; Phil Ebert; Rachael Redmond; Sam McNeely; Tim Holzer                                                                                                                                                                                                                                                                                                                                                                                                                                                                                                                                                                                                                                                                                                                                                                                                                                                                                                                                                                                                                                                                                                                                                                                                                                                                                                                                                                                                                                                                                                                                                                                                                                |
| EPI_ISL_416432                                                                                                                                                                                             | Clinical Microbiology Lab                                                                                                                                                                                              | Infectious Disease Research Department, King Abdullah International Medical Research Center (KAIMRC)                  | Abdulrahman Alswaji; Liliane Okdah; Majed Alghoribi; Michel Doumith; Sadeem Alhayli; Sameera Al Johani                                                                                                                                                                                                                                                                                                                                                                                                                                                                                                                                                                                                                                                                                                                                                                                                                                                                                                                                                                                                                                                                                                                                                                                                                                                                                                                                                                                                                                                                                                                                                                                                                                                                                                                              |
| EPI_ISL_1965724, EPI_ISL_3232350, EPI_ISL_3232463, EPI_ISL_1629596, EPI_ISL_2103701, EPI_ISL_3274840, EPI_ISL_3274874, EPI_ISL_3274920                                                                     | Clinical Microbiology Laboratory, NewYork Presbyterian Hospital/Columbia University Irving Medical Center<br>Clinical Microbiology, Infection Prevention and Control                                                   | Uhlemann Laboratory, Columbia University Irving Medical Center<br>Section for Molecular Diagnostics                   | Anne Kelley; Anne-Catrin Uhlemann; Maya Tagliavia; Medini K. Annavajhala<br>Björn Hallström; Jonas Björkman                                                                                                                                                                                                                                                                                                                                                                                                                                                                                                                                                                                                                                                                                                                                                                                                                                                                                                                                                                                                                                                                                                                                                                                                                                                                                                                                                                                                                                                                                                                                                                                                                                                                                                                         |
| EPI_ISL_1664407                                                                                                                                                                                            | Clinical Molecular Microbiology Laboratory, UNC Hospitals                                                                                                                                                              | Jeremy Wang                                                                                                           | Alexander Rubinsteyn; Colleen Rice; Corbin Jones; Jason Smedberg; Jeremy Wang; Melissa Miller; Robert Hagan; Shawn Hawken                                                                                                                                                                                                                                                                                                                                                                                                                                                                                                                                                                                                                                                                                                                                                                                                                                                                                                                                                                                                                                                                                                                                                                                                                                                                                                                                                                                                                                                                                                                                                                                                                                                                                                           |



|                                                                                                                                                                                                                                                                                                                                                                                                                                                                                                                                                                                                                                                                                                                                                                                                                                                |                                                                                                                                                                                         |                                                                                                                                                                                         |                                                                                                                                                                                                                                                                                                                                                                                                                                                                                                                                                                                                       |  |
|------------------------------------------------------------------------------------------------------------------------------------------------------------------------------------------------------------------------------------------------------------------------------------------------------------------------------------------------------------------------------------------------------------------------------------------------------------------------------------------------------------------------------------------------------------------------------------------------------------------------------------------------------------------------------------------------------------------------------------------------------------------------------------------------------------------------------------------------|-----------------------------------------------------------------------------------------------------------------------------------------------------------------------------------------|-----------------------------------------------------------------------------------------------------------------------------------------------------------------------------------------|-------------------------------------------------------------------------------------------------------------------------------------------------------------------------------------------------------------------------------------------------------------------------------------------------------------------------------------------------------------------------------------------------------------------------------------------------------------------------------------------------------------------------------------------------------------------------------------------------------|--|
| EPI_ISL_1664449                                                                                                                                                                                                                                                                                                                                                                                                                                                                                                                                                                                                                                                                                                                                                                                                                                |                                                                                                                                                                                         |                                                                                                                                                                                         |                                                                                                                                                                                                                                                                                                                                                                                                                                                                                                                                                                                                       |  |
| EPI_ISL_418282, EPI_ISL_527984, EPI_ISL_930910, EPI_ISL_1993848, EPI_ISL_3247300                                                                                                                                                                                                                                                                                                                                                                                                                                                                                                                                                                                                                                                                                                                                                               | Clinical Virology                                                                                                                                                                       | Clinical Bacteriology                                                                                                                                                                   | Adrian Egli; Alexander Gensch; Alfredo Mari; Christian Nickel; Fanny Wegner; Hans Hirsch; Hans Pargger; Helena MB Seth-Smith; Julia Bielicki; Karoline Leuzinger; Kirstine K. Soegaard; Madlen Stange; Manuel Battegay; Martin Siegemund; Michael Osthoff; Michael Schweitzer; Myrta Brunner; Rita Schneider-Silfemiale; Rita Schneider-Sliwa; Roland Bingisser; Sarah Tschudin-Sutter; Simon Fuchs; Stefano Bassetti; Tim Roloff                                                                                                                                                                     |  |
| EPI_ISL_2035560                                                                                                                                                                                                                                                                                                                                                                                                                                                                                                                                                                                                                                                                                                                                                                                                                                | Clinical Virology                                                                                                                                                                       | Clinical Virology                                                                                                                                                                       | Anissa Chouikha; Henda Triki; Kais Ghedira; Mariem Gdoura; Sondos Haddad; Wasfi Fares                                                                                                                                                                                                                                                                                                                                                                                                                                                                                                                 |  |
| EPI_ISL_3276877, EPI_ISL_3276885, EPI_ISL_3276887, EPI_ISL_3276908, EPI_ISL_3276925, EPI_ISL_3276945, EPI_ISL_3276950, EPI_ISL_3276954, EPI_ISL_3276974, EPI_ISL_3276983, EPI_ISL_3276996, EPI_ISL_3277011, EPI_ISL_3277026, EPI_ISL_3277048, EPI_ISL_3277052, EPI_ISL_3277075, EPI_ISL_3277080, EPI_ISL_3277088, EPI_ISL_3277103, EPI_ISL_3277104, EPI_ISL_3277118, EPI_ISL_3277124                                                                                                                                                                                                                                                                                                                                                                                                                                                           | Clinical Virology Laboratory, Institute of Liver and Biliary Sciences                                                                                                                   | ILBS                                                                                                                                                                                    | Amit Pandey; Chhagan Bihari Sharma; Diptanu Paul; Ekta Gupta; Reshu Agarwal; Shiv Kumar Sarin; Varun Suroliya                                                                                                                                                                                                                                                                                                                                                                                                                                                                                         |  |
| EPI_ISL_2626064, EPI_ISL_2885680, EPI_ISL_3089028, EPI_ISL_3261518, EPI_ISL_3386906, EPI_ISL_3545900, EPI_ISL_3920623, EPI_ISL_3920629, EPI_ISL_5113882, EPI_ISL_5113892                                                                                                                                                                                                                                                                                                                                                                                                                                                                                                                                                                                                                                                                       | Clinique Saint-Pierre Ottignies                                                                                                                                                         | UCLouvain/REC/MBLG                                                                                                                                                                      | Benoit Kabamba Mukadi; Bertrand Bearzatto; Jean Ruelle                                                                                                                                                                                                                                                                                                                                                                                                                                                                                                                                                |  |
| EPI_ISL_6809998                                                                                                                                                                                                                                                                                                                                                                                                                                                                                                                                                                                                                                                                                                                                                                                                                                | Clinique Saint-Pierre Ottignies                                                                                                                                                         | UCLouvain/REC/MBLG-CTMA                                                                                                                                                                 | Benoit Kabamba Mukadi; Bertrand Bearzatto; Jean-Luc Gala; Nicolas Pinte; Paul Blanpain; Simon Ophélie; Valentin Coste                                                                                                                                                                                                                                                                                                                                                                                                                                                                                 |  |
| EPI_ISL_949244, EPI_ISL_2230784, EPI_ISL_2427367, EPI_ISL_2626084, EPI_ISL_2778026, EPI_ISL_2885697, EPI_ISL_2966293, EPI_ISL_3261535, EPI_ISL_3261557, EPI_ISL_3261610, EPI_ISL_3386841, EPI_ISL_3386856, EPI_ISL_3386878, EPI_ISL_3545816, EPI_ISL_3545835, EPI_ISL_3545886, EPI_ISL_3760108, EPI_ISL_3760134, EPI_ISL_3920653, EPI_ISL_4069538, EPI_ISL_4740419, EPI_ISL_4740457                                                                                                                                                                                                                                                                                                                                                                                                                                                            | Cliniques universitaires Saint-Luc                                                                                                                                                      | UCLouvain/REC/MBLG                                                                                                                                                                      | Benoit Kabamba Mukadi; Bertrand Bearzatto; Jean Ruelle; Lysa Pinsmayer; Nicolas Pinte; Ophélie Simon                                                                                                                                                                                                                                                                                                                                                                                                                                                                                                  |  |
| EPI_ISL_5002426, EPI_ISL_5434035, EPI_ISL_5779864, EPI_ISL_5892421, EPI_ISL_5892424                                                                                                                                                                                                                                                                                                                                                                                                                                                                                                                                                                                                                                                                                                                                                            | Cliniques universitaires Saint-Luc                                                                                                                                                      | UCLouvain/REC/MBLG-CTMA                                                                                                                                                                 | Benoit Kabamba Mukadi; Bertrand Bearzatto; Jean-Luc Gala; Nicolas Pinte; Paul Blanpain; Simon Ophélie; Valentin Coste                                                                                                                                                                                                                                                                                                                                                                                                                                                                                 |  |
| EPI_ISL_1824880                                                                                                                                                                                                                                                                                                                                                                                                                                                                                                                                                                                                                                                                                                                                                                                                                                | Color Genomics                                                                                                                                                                          | Chiu Laboratory, University of California, San Francisco                                                                                                                                | Alicia Sotomayor-Gonzalez; Alicia Zhou; Candace Wang; Charles Chiu; Daniel Wong; Erika Torres; Madyson Wanner; Scott Topper; Venice Servellita; Yueyuan Zhang                                                                                                                                                                                                                                                                                                                                                                                                                                         |  |
| EPI_ISL_1234205, EPI_ISL_1539498, EPI_ISL_1540023, EPI_ISL_1540309, EPI_ISL_1617134, EPI_ISL_2194716, EPI_ISL_2790635, EPI_ISL_5260184, EPI_ISL_6581790, EPI_ISL_6581821, EPI_ISL_6581825, EPI_ISL_6581837, EPI_ISL_6581850, EPI_ISL_6581862, EPI_ISL_6581863, EPI_ISL_6581899, EPI_ISL_6602387                                                                                                                                                                                                                                                                                                                                                                                                                                                                                                                                                | Colorado Department of Public Health and Environment                                                                                                                                    | Colorado Department of Public Health and Environment                                                                                                                                    | Alexandria Rossheim; Diana Ir; Emily A. Travanty; Laura Bankers; Mandy Waters; Michael Martin; Molly C. Hetherington-Rauth; Sarah Elizabeth Totten; Shannon Ely; Shannon R. Matzinger                                                                                                                                                                                                                                                                                                                                                                                                                 |  |
| EPI_ISL_1710598                                                                                                                                                                                                                                                                                                                                                                                                                                                                                                                                                                                                                                                                                                                                                                                                                                | Communicable Diseases, Interactive Research School for Health Affairs                                                                                                                   | Communicable Diseases, Interactive Research School for Health Affairs                                                                                                                   | Akhilesh Chandra Mishra; Meera Modak; Rashmi Virkar; Shamburaje S Pisal; Shubham Shrivastava; Vidya A Arankalle                                                                                                                                                                                                                                                                                                                                                                                                                                                                                       |  |
| EPI_ISL_3100427                                                                                                                                                                                                                                                                                                                                                                                                                                                                                                                                                                                                                                                                                                                                                                                                                                | Community Testing Centre                                                                                                                                                                | Hong Kong Department of Health                                                                                                                                                          | Andy Y.Y. Cheung; Brian H.M. Sit; Dominic N.C. Tsang; Edman T.K. Lam; Ken H.L. Ng; Rickjason C.W. Chan; T.C. Kwong                                                                                                                                                                                                                                                                                                                                                                                                                                                                                    |  |
| EPI_ISL_4417584                                                                                                                                                                                                                                                                                                                                                                                                                                                                                                                                                                                                                                                                                                                                                                                                                                | Compensar Calle 63                                                                                                                                                                      | Centro de Investigaciones en Microbiología y Biotecnología-UR (CIMBIUR), Facultad de Ciencias Naturales, Universidad del Rosario, Bogotá, Colombia                                      | Angie Ramirez; Juan David Ramirez; Luz H. Patiño; Marcela Mercado-Reyes; Marina Muñoz; Nathalia Ballesteros; Nicolas Niño; Sergio Castañeda                                                                                                                                                                                                                                                                                                                                                                                                                                                           |  |
| EPI_ISL_1234630, EPI_ISL_1235340, EPI_ISL_1477977, EPI_ISL_2102590, EPI_ISL_2103017                                                                                                                                                                                                                                                                                                                                                                                                                                                                                                                                                                                                                                                                                                                                                            | Contra Costa County Public Health Lab                                                                                                                                                   | Chan-Zuckerberg Biohub                                                                                                                                                                  | CZB Cliahub Consortium                                                                                                                                                                                                                                                                                                                                                                                                                                                                                                                                                                                |  |
| EPI_ISL_1582436                                                                                                                                                                                                                                                                                                                                                                                                                                                                                                                                                                                                                                                                                                                                                                                                                                | Curative                                                                                                                                                                                | New Mexico Department of Health Scientific Laboratory                                                                                                                                   | Anastacia Griego-Fisher; D'eldra Malone; Ellie Johnson; Jennifer Benoit                                                                                                                                                                                                                                                                                                                                                                                                                                                                                                                               |  |
| EPI_ISL_3243133, EPI_ISL_3243139, EPI_ISL_3243140, EPI_ISL_3243143                                                                                                                                                                                                                                                                                                                                                                                                                                                                                                                                                                                                                                                                                                                                                                             | Curative Labs                                                                                                                                                                           | New Mexico Department of Health Scientific Laboratory                                                                                                                                   | Anastacia Griego-Fisher; D'eldra Malone; Ellie Johnson; Jennifer Benoit; Linda Salazar; Ratheesh Rajan; T. Mark Willmon                                                                                                                                                                                                                                                                                                                                                                                                                                                                               |  |
| EPI_ISL_935155                                                                                                                                                                                                                                                                                                                                                                                                                                                                                                                                                                                                                                                                                                                                                                                                                                 | Cytocheck Laboratory                                                                                                                                                                    | Kansas Health and Environmental Lab                                                                                                                                                     | Ben Olsen; Carissa Robertson; Mike Grose; Paige Drury; and Phil Adam                                                                                                                                                                                                                                                                                                                                                                                                                                                                                                                                  |  |
| EPI_ISL_1337990                                                                                                                                                                                                                                                                                                                                                                                                                                                                                                                                                                                                                                                                                                                                                                                                                                | DC Public Health Lab/ Dept. of Forensic Sciences                                                                                                                                        | DC Public Health Lab/ Dept. of Forensic Sciences                                                                                                                                        | Brittany Hamilton; Connie Maza; David Payne; Elizabeth Zelaya; Janis Doss; Jocelyn Hauser; Monica Mann; Sarah Scott; Scott Nguyen                                                                                                                                                                                                                                                                                                                                                                                                                                                                     |  |
| EPI_ISL_1788748, EPI_ISL_2270872                                                                                                                                                                                                                                                                                                                                                                                                                                                                                                                                                                                                                                                                                                                                                                                                               | DIP. PREV. AVEZZANO SERVIZIO DI IGIENE EPIDEMIOLOGIA E SANITA' PUBBLICA                                                                                                                 | Istituto Zooprofilattico Sperimentale dell'Abruzzo e Molise "G. Caporale"                                                                                                               | Ancora M; Calistri P; Cammà C; Caporale M; Curini V; Delli Compagni E; Di Domenico M; Di Lollo Valeria; Di Pasquale A; Lorusso A; Mangone I; Marccacci M; Puglia I; Rinaldi A; Savini G; Scialabba S                                                                                                                                                                                                                                                                                                                                                                                                  |  |
| EPI_ISL_1580608                                                                                                                                                                                                                                                                                                                                                                                                                                                                                                                                                                                                                                                                                                                                                                                                                                | DIP. PREV. AVEZZANO SERVIZIO DI IGIENE EPIDEMIOLOGIA E SANITA' PUBBLICA AVEZZANO(L'AQUILA)                                                                                              | Istituto Zooprofilattico Sperimentale dell'Abruzzo e Molise "G. Caporale"                                                                                                               | Ancora M; Calistri P; Cammà C; Caporale M; Curini V; Delli Compagni E; Di Domenico M; Di Lollo Valeria; Di Pasquale A; Lorusso A; Mangone I; Marccacci M; Puglia I; Rinaldi A; Savini G; Scialabba S                                                                                                                                                                                                                                                                                                                                                                                                  |  |
| EPI_ISL_3216433                                                                                                                                                                                                                                                                                                                                                                                                                                                                                                                                                                                                                                                                                                                                                                                                                                | DOHMH Corona                                                                                                                                                                            | New York City Public Health Laboratory                                                                                                                                                  | Jade Wang; et al.                                                                                                                                                                                                                                                                                                                                                                                                                                                                                                                                                                                     |  |
| EPI_ISL_3216438                                                                                                                                                                                                                                                                                                                                                                                                                                                                                                                                                                                                                                                                                                                                                                                                                                | DOHMH Crown Heights                                                                                                                                                                     | New York City Public Health Laboratory                                                                                                                                                  | Jade Wang; et al.                                                                                                                                                                                                                                                                                                                                                                                                                                                                                                                                                                                     |  |
| EPI_ISL_3254231                                                                                                                                                                                                                                                                                                                                                                                                                                                                                                                                                                                                                                                                                                                                                                                                                                | DOHMH Fort Greene                                                                                                                                                                       | New York City Public Health Laboratory                                                                                                                                                  | Jade Wang; et al.                                                                                                                                                                                                                                                                                                                                                                                                                                                                                                                                                                                     |  |
| EPI_ISL_3254292                                                                                                                                                                                                                                                                                                                                                                                                                                                                                                                                                                                                                                                                                                                                                                                                                                | DOHMH Jamaica                                                                                                                                                                           | New York City Public Health Laboratory                                                                                                                                                  | Jade Wang; et al.                                                                                                                                                                                                                                                                                                                                                                                                                                                                                                                                                                                     |  |
| EPI_ISL_3216446                                                                                                                                                                                                                                                                                                                                                                                                                                                                                                                                                                                                                                                                                                                                                                                                                                | DOHMH PHL                                                                                                                                                                               | New York City Public Health Laboratory                                                                                                                                                  | Jade Wang; et al.                                                                                                                                                                                                                                                                                                                                                                                                                                                                                                                                                                                     |  |
| EPI_ISL_1511153                                                                                                                                                                                                                                                                                                                                                                                                                                                                                                                                                                                                                                                                                                                                                                                                                                | DPHL                                                                                                                                                                                    | Delaware Public Health Lab                                                                                                                                                              | Rebecca Savage                                                                                                                                                                                                                                                                                                                                                                                                                                                                                                                                                                                        |  |
| EPI_ISL_2597228, EPI_ISL_7338111, EPI_ISL_7338113, EPI_ISL_7338114, EPI_ISL_7338376, EPI_ISL_7338402, EPI_ISL_7338766                                                                                                                                                                                                                                                                                                                                                                                                                                                                                                                                                                                                                                                                                                                          | DSMRC                                                                                                                                                                                   | DSMRC                                                                                                                                                                                   | Aung Sitt Hmue; Khine Zaw Oo; Ko Ko Lwin; Ko Ko Win; Kyaw Zaw Lin; Kye Myint; Nay Myo Aung; Pai Khant Kyaw; Phyo Kyaw Aung; Thet Wai Oo; Zaw Myo Lwin; Zaw Win Htun                                                                                                                                                                                                                                                                                                                                                                                                                                   |  |
| EPI_ISL_1434053                                                                                                                                                                                                                                                                                                                                                                                                                                                                                                                                                                                                                                                                                                                                                                                                                                | DYOMEDEA SAUVEGARDE LYON                                                                                                                                                                | CNR Virus des Infections Respiratoires - France SUD                                                                                                                                     | Antonin Bal; Bruno Lina; Bruno Simon; Gregory Destras; Gwendolyne Burfin; Hadrien Regue; Laurence Josset; Martine Valette; Quentin Semanas                                                                                                                                                                                                                                                                                                                                                                                                                                                            |  |
| EPI_ISL_3206239, EPI_ISL_3206245, EPI_ISL_3206273, EPI_ISL_3206292, EPI_ISL_3206295, EPI_ISL_3206324, EPI_ISL_3206328, EPI_ISL_3206365, EPI_ISL_3206404, EPI_ISL_3206415, EPI_ISL_3206450, EPI_ISL_3206687                                                                                                                                                                                                                                                                                                                                                                                                                                                                                                                                                                                                                                     | DYOMEDEA-LABORATOIRE DE LA SAUVEGARDE                                                                                                                                                   | CNR Virus des Infections Respiratoires - France SUD                                                                                                                                     | Antonin Bal; Bruno Lina; Gregory Destras; Gwendolyne Burfin; Hadrien Regue; Laurence Josset; Martine Valette; Quentin Semanas                                                                                                                                                                                                                                                                                                                                                                                                                                                                         |  |
| EPI_ISL_416543                                                                                                                                                                                                                                                                                                                                                                                                                                                                                                                                                                                                                                                                                                                                                                                                                                 | Dasman Diabetes Institute                                                                                                                                                               | Dasman Diabetes Institute                                                                                                                                                               | Ebaa AlOzairi; Fahd Al-Mulla; Motasem Melhem; Qais Al-Duwairi; Rasheeba Iqbal; Sara Al-Qabandi; Sumi John                                                                                                                                                                                                                                                                                                                                                                                                                                                                                             |  |
| EPI_ISL_416541                                                                                                                                                                                                                                                                                                                                                                                                                                                                                                                                                                                                                                                                                                                                                                                                                                 | Dasman Diabetes Institute and Virology Laboratory Ministry of Health                                                                                                                    | Dasman Diabetes Institute                                                                                                                                                               | Ebaa AlOzairi; Fahd Al-Mulla; Motasem Melhem; Qais Al-Duwairi; Rasheeba Iqbal; Sara Al-Qabandi; Sumi John                                                                                                                                                                                                                                                                                                                                                                                                                                                                                             |  |
| EPI_ISL_1318759, EPI_ISL_1318908                                                                                                                                                                                                                                                                                                                                                                                                                                                                                                                                                                                                                                                                                                                                                                                                               | DeRisi Lab, University of California, San Francisco                                                                                                                                     | DeRisi Lab, University of California, San Francisco                                                                                                                                     | Amy Kistler; Anthea Mitchell; Carina Marquez; Diane Havir; Diane Jones; Douglas Black; Eric Chow; Gabriel Chامية; Genay Pilarowski; Idseq Team; Jackie Martinez; James Peng; Jamin Liu; Jon Jacobo; Lucy Li; Luis Rubio; Manu Vanaerschot; Matthew Laurie; Maya Petersen; Patrick Ayscue; Sabrina Mann; Sara Sunshine; Susana Rojas; Susy Rojas; Valerie Tuller-Laiwa; and Joseph DeRisi                                                                                                                                                                                                              |  |
| EPI_ISL_476022                                                                                                                                                                                                                                                                                                                                                                                                                                                                                                                                                                                                                                                                                                                                                                                                                                 | Defence Research & Development Establishment                                                                                                                                            | Defence Research & Development Establishment                                                                                                                                            | Ambuj Shrivastava; Jyoti S Kumar; Paban Kumar Dash; Shashi Sharma; Sushil Kumar Sharma                                                                                                                                                                                                                                                                                                                                                                                                                                                                                                                |  |
| EPI_ISL_3204243, EPI_ISL_3204256, EPI_ISL_3204259, EPI_ISL_3208860                                                                                                                                                                                                                                                                                                                                                                                                                                                                                                                                                                                                                                                                                                                                                                             | Department for Virology, Molecular Biology and Genome Research, R. G. Lugar Center for Public Health Research, National Center for Disease Control and Public Health (NCDC) of Georgia. | Department for Virology, Molecular Biology and Genome Research, R. G. Lugar Center for Public Health Research, National Center for Disease Control and Public Health (NCDC) of Georgia. | Adam Kotorashvili; Amiran Gamkrelidze.; Ana Papkiauri; Ann Machabishvili; Anna Kasradze; Davit Tsaguria; Ekaterine Khmaladze; Ekaterine Zangaladze; Ekaterine Zhghenti; Giorgi Gogoladze; Giorgi Tomashvili; Gvantsa Brachveli; Gvantsa Chanturia; Irma Burjanadze; Ketevan Sidamonidze; Khatuna Zakhashvili; Lela Sabadze; Lela Urushadze; Magda Dgebuadze; Maia Alkhashashvili; Mari Gavashelidze; Mariam Zakalashvili; Marne Murtskhaladze; Meri Pantulalia; Nato Kotaria; Nino Berishvili; Paata Imnadze; Roena Sukhlishvili; Salome Javashvili; Tamar Jashlishvili; Tata Imnadze; Tea Tvedoradze |  |
| EPI_ISL_2411459, EPI_ISL_2411461, EPI_ISL_2411600, EPI_ISL_2411759, EPI_ISL_2418253, EPI_ISL_2418287, EPI_ISL_2418298, EPI_ISL_3228424, EPI_ISL_3228507, EPI_ISL_3228661, EPI_ISL_3228678, EPI_ISL_3228733, EPI_ISL_3228880, EPI_ISL_3228978, EPI_ISL_3228981, EPI_ISL_3229132, EPI_ISL_3229152, EPI_ISL_3240018, EPI_ISL_3240030, EPI_ISL_3240054, EPI_ISL_3240084, EPI_ISL_3240315, EPI_ISL_3240352, EPI_ISL_3240382, EPI_ISL_3240423, EPI_ISL_3240442, EPI_ISL_3240459, EPI_ISL_3240578, EPI_ISL_3240579, EPI_ISL_3240701, EPI_ISL_3240828, EPI_ISL_3240974, EPI_ISL_3241112, EPI_ISL_3241238, EPI_ISL_3251338, EPI_ISL_3251661, EPI_ISL_3251674, EPI_ISL_3251686, EPI_ISL_3251983, EPI_ISL_3251998, EPI_ISL_3252158, EPI_ISL_3252220, EPI_ISL_3252235, EPI_ISL_3252504, EPI_ISL_3252542, EPI_ISL_3279537, EPI_ISL_3280177, EPI_ISL_3280760 | Department of Bacteria, Parasites and Fungi, Statens Serum Institut, Copenhagen, Denmark                                                                                                | Statens Serum Institut Bioinformatics and Microbial Genomics                                                                                                                            | Danish Covid-19 Genome Consortium                                                                                                                                                                                                                                                                                                                                                                                                                                                                                                                                                                     |  |
| EPI_ISL_417008, EPI_ISL_417014, EPI_ISL_417015, EPI_ISL_417019, EPI_ISL_417020, EPI_ISL_417021, EPI_ISL_418628, EPI_ISL_418629, EPI_ISL_418630, EPI_ISL_418631, EPI_ISL_418633, EPI_ISL_418634, EPI_ISL_418635, EPI_ISL_418636, EPI_ISL_418638, EPI_ISL_418646, EPI_ISL_418648, EPI_ISL_418649, EPI_ISL_418650, EPI_ISL_418651, EPI_ISL_418652, EPI_ISL_418653, EPI_ISL_418654, EPI_ISL_418656, EPI_ISL_418657, EPI_ISL_418659, EPI_ISL_418660, EPI_ISL_418663, EPI_ISL_421186, EPI_ISL_424664, EPI_ISL_1492838, EPI_ISL_1826657, EPI_ISL_2139838                                                                                                                                                                                                                                                                                              |                                                                                                                                                                                         |                                                                                                                                                                                         |                                                                                                                                                                                                                                                                                                                                                                                                                                                                                                                                                                                                       |  |

|                                                                                                                   |                                                                                                                                                                                                                                                                                    |                                                                                                                                                   |                                                                                                                                                                                                                                                                                                                                                                                                                                                                                                                                                                                    |
|-------------------------------------------------------------------------------------------------------------------|------------------------------------------------------------------------------------------------------------------------------------------------------------------------------------------------------------------------------------------------------------------------------------|---------------------------------------------------------------------------------------------------------------------------------------------------|------------------------------------------------------------------------------------------------------------------------------------------------------------------------------------------------------------------------------------------------------------------------------------------------------------------------------------------------------------------------------------------------------------------------------------------------------------------------------------------------------------------------------------------------------------------------------------|
| see above                                                                                                         | Department of Clinical Microbiology                                                                                                                                                                                                                                                | GIGA Medical Genomics                                                                                                                             | Artesi Maria; Bontems Sébastien; Boreux Raphaël; Bouchra Boujemla; Bours Vincent.; Cécile Meex; Durkin Keith; Hayette Marie-Pierre; Keith Durkin; Maria Artesi; Marie-Pierre Hayette; Meex Cécile; Melin Pierrette; Nathalie Renotte; Pierrette Meiln; Raphaël Boreux; Sébastien Bontems; Vincent Bours; Vincent Bours.                                                                                                                                                                                                                                                            |
| EPI_ISL_2176004<br>EPI_ISL_417187,<br>EPI_ISL_417193,<br>EPI_ISL_417197,<br>EPI_ISL_418815                        | Department of Clinical Microbiology, Odense University Hospital, Odense, Denmark<br>Department of Clinical Pathology, Pamela Youde Nethersole Eastern Hospital                                                                                                                     | Aalborg University<br>Department of Health Technology and Informatics, Faculty of Health and Social Science, The Hong Kong Polytechnic University | Danish Covid-19 Genome Consortium<br>Alan Ka-Lun WU; Alex Yat-Man HO; Barry Kin-Chung WONG; David Ho-Keung SHUM; Eugene Yuk-Keung TSO; Gilman Kit-Hang SIU; Hiu-Yin LAO; Kam-Tong YIP; Kam-Tong Yip; Kenneth Siu-Sing LEUNG; Kingsley King-Gee TAM; Kit-Man SIN; Kitty Sau-Chun FUNG; Kwok-Cheung LUNG; Lam-Kwong LEE; Man-Chun CHAN; Ming-Pan CHOI; Miranda Chong-Yee YAU; Raymond Wai-To LIU; Sandy Ka-Yee CHAU; Shea Ping YIP; Tak-Lun QUE; Tak-Lun Que; Timothy Ting-Leung NG; Wai-Shing LEUNG; Wing Cheong YAM; Wing-Kin TO; Yuk-Yung NG                                      |
| EPI_ISL_3183363,<br>EPI_ISL_3183366                                                                               | Department of Health Science, Gifu Prefectural Research Institute for Health and Environmental Sciences                                                                                                                                                                            | Gifu Prefectural Research Institute for Health and Environmental Sciences                                                                         | Kentaro Itokawa; Makoto Kuroda; Masahiro Nishioka; Masanori Hashino; Rina Tanaka; Takuya Mizuno; Tomohiro Yamaguchi; Tsuyoshi Kuzuguchi; Tsuyoshi Sekizuka; Yoshihiro Kameyama; Yuta Uramoto                                                                                                                                                                                                                                                                                                                                                                                       |
| EPI_ISL_1019650,<br>see above                                                                                     | EPI_ISL_1019653, EPI_ISL_1020073, EPI_ISL_1020096, EPI_ISL_1020222, EPI_ISL_1020242, EPI_ISL_2710823, EPI_ISL_2710864, EPI_ISL_2713167, EPI_ISL_2713202, EPI_ISL_2860778, EPI_ISL_4968430<br>Department of Health Technology and Informatics, The Hong Kong Polytechnic University | Department of Health Technology and Informatics, The Hong Kong Polytechnic University                                                             | Alan Ka-Lun WU; Alex Yat-Man HO; Barry Kin-Chung Wong; Chloe Toi-Mei Chan; David Ho-Keung Shum; Denise Sze-Hang Wong; Gilman Kit-Hang Siu; Hiu-Yin Lao; Hoi-Ching Jim; Ivan Tak-Fai Wong; Jake Siu-Lun Leung; Kam-Tong Yip; Kenneth Siu-Sing Leung; Kingsley King-Gee Tam; Kitty Sau-Chun Fung; Kristine Luk; Lam-Kwong Lee; Miranda Chong-Yee Yau; Sandy Ka-Yee Chau; Shea Ping YIP; Tak-Lun Que; Timothy Ting-Leung Ng; Wing Cheong Yam; Wing-Hei Lo; Wing-Kin To; Yvette Wai-Man Lai                                                                                            |
| EPI_ISL_417444                                                                                                    | Department of Healthcare Biotechnology, National University of Sciences and Technology (NUST)                                                                                                                                                                                      | Department of Healthcare Biotechnology, National University of Sciences and Technology (NUST)                                                     | Corman; Ghani, E.; H.A.; Janjua; Javed, A.; Niazi; S.K.; Saqib, M.; V.M. and Zohaib, A.                                                                                                                                                                                                                                                                                                                                                                                                                                                                                            |
| EPI_ISL_412973                                                                                                    | Department of Infectious Diseases, Istituto Superiore di Sanità, Roma , Italy; Ospedale Luigi Sacco, Milano, Italy                                                                                                                                                                 | Virology Laboratory, Scientific Department, Army Medical Center                                                                                   | Andrea Ciammaruconi; Anna Anselmo; Antonella Fortunato; Antonella Marchi; Concetta Fabiani; Eleonora Benedetti; Florigio Lista; Giovanni Faggioni; Maria Rita Gismondo; Paola Stefanelli; Riccardo De Santis; Silvia Fillo; Stefano Fiore; Stefano Palomba                                                                                                                                                                                                                                                                                                                         |
| EPI_ISL_1169040,<br>see above                                                                                     | EPI_ISL_1425483, EPI_ISL_1941669, EPI_ISL_3182327, EPI_ISL_3182504, EPI_ISL_3183708, EPI_ISL_3183714, EPI_ISL_3183725, EPI_ISL_3191080, EPI_ISL_3191083, EPI_ISL_3191098, EPI_ISL_3191682, EPI_ISL_3191700<br>Department of Infectious Diseases, Kobe Institute of Health          | Department of Infectious Diseases, Kobe Institute of Health                                                                                       | Kentaro Itokawa; Makoto Kuroda; Masanori Hashino; Noriko Nakanishi; Rina Tanaka; Ryohei Nomoto; Tomotada Iwamoto; Tsuyoshi Sekizuka                                                                                                                                                                                                                                                                                                                                                                                                                                                |
| EPI_ISL_406596,<br>EPI_ISL_408430,<br>EPI_ISL_410984<br>EPI_ISL_413019                                            | Department of Infectious and Tropical Diseases, Bichat Claude Bernard Hospital, Paris<br>Department of Internal Medicine, Triemli Hospital                                                                                                                                         | National Reference Center for Viruses of Respiratory Infections, Institut Pasteur, Paris<br>Institute of Medical Virology, University of Zurich   | Angela Brisebarre; Flora Donati; Marion Barbet; Maud Vanpeene; Mélanie Albert; Méline Bizard; Sylvie Behillili; Sylvie van der Werf; Vincent Enouf; Xavier Lescure; Xavier Lescure.; Yazdan Yazdanpanah<br>Alexandra Trkola; Andrea Zbinden; Fiona Steiner; Gerhard Eich; Jon Huder; Jürg Böni; Maryam Zaheri; Michael Huber; Patrick Redli; Riccarda Capaul; Stefan Schmutz; Verena Kufner                                                                                                                                                                                        |
| EPI_ISL_1180875,<br>EPI_ISL_1209312,<br>EPI_ISL_2232739                                                           | Department of Laboratory Medicine, Division of Clinical Virology, University of Medicine, Vienna                                                                                                                                                                                   | Berghaler laboratory, CeMM Research Center for Molecular Medicine of the Austrian Academy of Sciences                                             | Andreas Berghaler; Anna Schedl; Bekir Erguner; Benedikt Agerer; Christoph Böck; Fabian Amman; Jan Laine; Lukas Endler; Maelle Le Moing; Martin Senekowitsch; Michael Schuster; Petr Triska; Thomas Penz                                                                                                                                                                                                                                                                                                                                                                            |
| EPI_ISL_410218                                                                                                    | Department of Laboratory Medicine, National Taiwan University Hospital                                                                                                                                                                                                             | Microbial Genomics Core Lab, National Taiwan University Centers of Genomic and Precision Medicine                                                 | Chiao-Ling Li; Pei-Jer Chen; Shan-Chwen Chang; Shiou-Hwei Yeh; Sui-Yuan Chang; Ya-Yun Lai; You-Yu Lin                                                                                                                                                                                                                                                                                                                                                                                                                                                                              |
| EPI_ISL_1678640,<br>EPI_ISL_1678862                                                                               | Department of Medical Microbiology & Infection prevention, Amsterdam University Medical Centers location AMC                                                                                                                                                                       | Department of Medical Microbiology & Infection prevention, Amsterdam University Medical Centers location AMC                                      | Fokla Zorgdrager; Janke Schinkel; Marcel Jonges; Matthijs Welkers; Menno de Jong; Robin van Houdt; Sebastien Matamoros; Sjoerd Rebers                                                                                                                                                                                                                                                                                                                                                                                                                                              |
| EPI_ISL_1819395                                                                                                   | Department of Medical Microbiology - section Molde, Molde Hospital                                                                                                                                                                                                                 | Norwegian Institute of Public Health, Department of Virology                                                                                      | Atiya R Ali; Debec Nadia; Engebretsen Serina Beate; Garcia Llorente Ignacio; Hilde Elshaug; Hilde Vollan; Jon Bråte; Kamilla Heddeland Instefjord; Karoline Bragstad; Kathrine Stene-Johansen; Marie Paulsen Madsen; Olav Hungnes; Pedersen Benedikte Nevjen; Rasmus Riis Kopperud                                                                                                                                                                                                                                                                                                 |
| EPI_ISL_3229882,<br>EPI_ISL_3230001                                                                               | Department of Medical Microbiology, St. Olavs hospital                                                                                                                                                                                                                             | Norwegian Institute of Public Health, Department of Virology                                                                                      | Atiya R Ali; Debec Nadia; Engebretsen Serina Beate; Garcia Llorente Ignacio; Hilde Elshaug; Hilde Vollan; Jon Bråte; Kamilla Heddeland Instefjord; Karoline Bragstad; Kathrine Stene-Johansen; Line Victoria Moen; Marie Paulsen Madsen; Olav Hungnes; Pedersen Benedikte Nevjen; Rasmus Riis Kopperud                                                                                                                                                                                                                                                                             |
| EPI_ISL_417917                                                                                                    | Department of Medical Microbiology, University Malaya Medical Centre                                                                                                                                                                                                               | Department of Medical Microbiology                                                                                                                | Adeeba KAMARULZAMAN; Chee Kuan WONG; Cindy Shuan Ju TEH; I-Ching SAM; Sasheela PONNAMPALAVANAR; Sharifah Faridah SYED OMAR; University Malaya Medical Centre COVID Team; Vijayan MUNUSAMY; Yoke Fun Chan; Yoong Min CHONG                                                                                                                                                                                                                                                                                                                                                          |
| EPI_ISL_501188,<br>EPI_ISL_501193,<br>EPI_ISL_501205,<br>EPI_ISL_501208                                           | Department of Medical Microbiology, University Malaya Medical Centre                                                                                                                                                                                                               | Department of Medical Microbiology, Faculty of Medicine, University of Malaya                                                                     | I-Ching SAM; Jennifer Chong; University Malaya Medical Centre COVID Team; Yoke Fun CHAN; Yoong Min CHONG                                                                                                                                                                                                                                                                                                                                                                                                                                                                           |
| EPI_ISL_528821                                                                                                    | Department of Medicine, Gandhi hospital, Hyderabad                                                                                                                                                                                                                                 | CSIR-Centre for Cellular and Molecular Biology                                                                                                    | Archana Bharadwaj Siva; Dhiviya Vedagiri; Divya Gupta; Divya Tej Sowpati; Gangumala Srinivas Reddy; Karthik Bharadwaj Tallapaka; Krishnan Harinivas Harshan; Lamuk Zaveri; M Soujanya Reddy; Namami Gaur; Nikhil Hajirnis; Onkar Kulkarni; Payel Mukherjee; Pratheusa Maccha; Priya Singh; Purushotham Vodnal; Rajarao Mesipogu; Rakesh K Mishra; Renu Sudhakar; Sakshi Shambhavi; Santosh Kumar Kuncha; Shagurfa Khan; Sofia Banu; Somesh Gorde; Sujoy Deb; Swati Bayyana; Thrilok Chander Bingi; Tulasi Nagabandi; Vinayasekhar Aedula; Vishal Sah<br>Paul K.S. Chan; Zigui Chen |
| EPI_ISL_3065948<br>EPI_ISL_413017,<br>EPI_ISL_413018                                                              | Department of Microbiology, Institute for Viral Diseases, College of Medicine, Korea University                                                                                                                                                                                    | Department of Microbiology, Institute for Viral Diseases, College of Medicine, Korea University                                                   | Changmin Kang; Cui Chunguang; Dong Min Kim; Gee eun Lee; Heedo Park; Jeonghun Kim; Jin Il Kim; Joon-Yong Bae; Jungmin Lee; Juyoung Cho; Kyeong-ryeol Shin; Man-Seong Park                                                                                                                                                                                                                                                                                                                                                                                                          |
| EPI_ISL_4545814,<br>see above                                                                                     | EPI_ISL_4550705, EPI_ISL_4550741, EPI_ISL_4550761, EPI_ISL_5144423, EPI_ISL_5429542, EPI_ISL_6567035, EPI_ISL_6965698, EPI_ISL_6965728<br>Department of Microbiology, National Institute of Public Health of Kosovo                                                                | Department of Microbiology, National Institute of Public Health of Kosovo                                                                         | Aferdita Hyseni; Aferdita Kuqi-Hyseni; Blendi Jerliu; Donjeta Hajdari; Nazmi Mehmeti; Pranvera Abazi; Robert Ramadani; Xhevat Jakupi; Zana Deva                                                                                                                                                                                                                                                                                                                                                                                                                                    |
| EPI_ISL_417176,<br>EPI_ISL_417178                                                                                 | Department of Pathology, Princess Margaret Hospital                                                                                                                                                                                                                                | Department of Health Technology and Informatics, Faculty of Health and Social Science, The Hong Kong Polytechnic University                       | Alan Ka-Lun WU; Alex Yat-Man HO; Barry Kin-Chung WONG; David Ho-Keung SHUM; Eugene Yuk-Keung TSO; Gilman Kit-Hang SIU; Hiu-Yin LAO; Kam-Tong YIP; Kenneth Siu-Sing LEUNG; Kingsley King-Gee TAM; Kit-Man SIN; Kitty Sau-Chun FUNG; Kwok-Cheung LUNG; Lam-Kwong LEE; Man-Chun CHAN; Ming-Pan CHOI; Miranda Chong-Yee YAU; Raymond Wai-To LIU; Sandy Ka-Yee CHAU; Shea Ping YIP; Tak-Lun Que; Timothy Ting-Leung NG; Wai-Shing LEUNG; Wing Cheong YAM; Wing-Kin TO; Yuk-Yung NG                                                                                                      |
| EPI_ISL_2692908                                                                                                   | Department of Pathology, School of Medicine, Imam Hospital Complex, Tehran University of Medical Sciences, Tehran, Iran                                                                                                                                                            | Genetics Research Center, University of Social Welfare and Rehabilitation Sciences                                                                | Ali Jafarpour; Alireza Abdollahi; Azam Ghaziasadi; Azar Hadadi; Hossein Najmabadi.; Khadijeh Jalalvand; Kimia Kahrizi; Marzieh Mohseni; Reza Najafipour; Saber Soltani; Seyed Mohammad Jazayeri; Seyedeh elham Mortazavi; Zohreh Fattahi                                                                                                                                                                                                                                                                                                                                           |
| EPI_ISL_417181                                                                                                    | Department of Pathology, United Christian Hospital                                                                                                                                                                                                                                 | Department of Health Technology and Informatics, Faculty of Health and Social Science, The Hong Kong Polytechnic University                       | Alan Ka-Lun WU; Alex Yat-Man HO; Barry Kin-Chung WONG; David Ho-Keung SHUM; Eugene Yuk-Keung TSO; Gilman Kit-Hang SIU; Hiu-Yin LAO; Kam-Tong YIP; Kenneth Siu-Sing LEUNG; Kingsley King-Gee TAM; Kit-Man SIN; Kitty Sau-Chun FUNG; Kwok-Cheung LUNG; Lam-Kwong LEE; Man-Chun CHAN; Ming-Pan CHOI; Miranda Chong-Yee YAU; Raymond Wai-To LIU; Sandy Ka-Yee CHAU; Shea Ping YIP; Tak-Lun Que; Timothy Ting-Leung NG; Wai-Shing LEUNG; Wing Cheong YAM; Wing-Kin TO; Yuk-Yung NG                                                                                                      |
| EPI_ISL_764322,<br>EPI_ISL_949499,<br>EPI_ISL_1247295,<br>EPI_ISL_1247339,<br>EPI_ISL_1250160,<br>EPI_ISL_1310676 | Department of Pathology, University of Cambridge                                                                                                                                                                                                                                   | COVID-19 Genomics UK (COG-UK) Consortium                                                                                                          | Aminu S. Jahun; Grant Hall; Ian Goodfellow; Iliana Georgana; Malte Pinckert; Martin D. Curran; Myra Hosmillo; Rhys Izu; Rhys Izuagbe; Surendra Parmar; William L. Hamilton; Yasmin Chaudhry                                                                                                                                                                                                                                                                                                                                                                                        |
| EPI_ISL_2099878                                                                                                   | Department of Public Health Bucharest                                                                                                                                                                                                                                              | National Institute of Infectious Diseases-Prof. Dr. Matei Bals Molecular Diagnostics Laboratory                                                   | Andreea Tudor; Corina Casangiu; Dan Otelea; Leontina Banica; Marius Surleac; Ovidiu Vlaicu; Simona Paraschiv                                                                                                                                                                                                                                                                                                                                                                                                                                                                       |
| EPI_ISL_3259613,<br>EPI_ISL_3259621                                                                               | Department of Public Health Iasi                                                                                                                                                                                                                                                   | National Institute of Infectious Diseases-Prof. Dr. Matei Bals Molecular Diagnostics Laboratory                                                   | Corina Casangiu; Dan Otelea; Leontina Banica; Marius Surleac; Ovidiu Vlaicu; Petre Milu; Robert Hohan; Simona Paraschiv                                                                                                                                                                                                                                                                                                                                                                                                                                                            |
| EPI_ISL_3259633,<br>EPI_ISL_3259642                                                                               | Department of Public Health Ilfov                                                                                                                                                                                                                                                  | National Institute of Infectious Diseases-Prof. Dr. Matei Bals Molecular Diagnostics Laboratory                                                   | Corina Casangiu; Dan Otelea; Leontina Banica; Marius Surleac; Ovidiu Vlaicu; Petre Milu; Robert Hohan; Simona Paraschiv                                                                                                                                                                                                                                                                                                                                                                                                                                                            |
| EPI_ISL_1654449,                                                                                                  | Department of Public Health Microbiology Ljubljana, National Laboratory for Health,                                                                                                                                                                                                | Department for Public Health                                                                                                                      | José Gonçalves; Katarina Prosenec; Martin Bosilj; Metka Paragi; Natasa Berginc; Tom Koritnik                                                                                                                                                                                                                                                                                                                                                                                                                                                                                       |



|                                                                                                                                                                                                                                                                                                                                                                                                                                                                                                                                                                                                                                                                                                                                                                                                                                                                                                                                                                                                                                                                                                                                                                                                                                                                                                                                                                                                                                                                                                                                                                                                                                                                                                                                                                                                                                                                                                                                                             | Dianalabs SA                                                                                                                        | Genesupport                                                                                                                                                                                                                                                                                                                                                                                                                                                                                                                                                                                                                                                                                                                                                                                                                                                                                                                                                           | Geraldine Jost; Katia Jatón; Nadia Liassine; Tanguy ARAUD                                                                                                                                                                                                                                                                                  |
|-------------------------------------------------------------------------------------------------------------------------------------------------------------------------------------------------------------------------------------------------------------------------------------------------------------------------------------------------------------------------------------------------------------------------------------------------------------------------------------------------------------------------------------------------------------------------------------------------------------------------------------------------------------------------------------------------------------------------------------------------------------------------------------------------------------------------------------------------------------------------------------------------------------------------------------------------------------------------------------------------------------------------------------------------------------------------------------------------------------------------------------------------------------------------------------------------------------------------------------------------------------------------------------------------------------------------------------------------------------------------------------------------------------------------------------------------------------------------------------------------------------------------------------------------------------------------------------------------------------------------------------------------------------------------------------------------------------------------------------------------------------------------------------------------------------------------------------------------------------------------------------------------------------------------------------------------------------|-------------------------------------------------------------------------------------------------------------------------------------|-----------------------------------------------------------------------------------------------------------------------------------------------------------------------------------------------------------------------------------------------------------------------------------------------------------------------------------------------------------------------------------------------------------------------------------------------------------------------------------------------------------------------------------------------------------------------------------------------------------------------------------------------------------------------------------------------------------------------------------------------------------------------------------------------------------------------------------------------------------------------------------------------------------------------------------------------------------------------|--------------------------------------------------------------------------------------------------------------------------------------------------------------------------------------------------------------------------------------------------------------------------------------------------------------------------------------------|
| EPI_ISL_3275502, EPI_ISL_3275511, EPI_ISL_3275524, EPI_ISL_3275573, EPI_ISL_3275579                                                                                                                                                                                                                                                                                                                                                                                                                                                                                                                                                                                                                                                                                                                                                                                                                                                                                                                                                                                                                                                                                                                                                                                                                                                                                                                                                                                                                                                                                                                                                                                                                                                                                                                                                                                                                                                                         |                                                                                                                                     |                                                                                                                                                                                                                                                                                                                                                                                                                                                                                                                                                                                                                                                                                                                                                                                                                                                                                                                                                                       |                                                                                                                                                                                                                                                                                                                                            |
| EPI_ISL_1724450, EPI_ISL_1849295                                                                                                                                                                                                                                                                                                                                                                                                                                                                                                                                                                                                                                                                                                                                                                                                                                                                                                                                                                                                                                                                                                                                                                                                                                                                                                                                                                                                                                                                                                                                                                                                                                                                                                                                                                                                                                                                                                                            | Dianovis GmbH Greiz                                                                                                                 | Robert Koch Institute                                                                                                                                                                                                                                                                                                                                                                                                                                                                                                                                                                                                                                                                                                                                                                                                                                                                                                                                                 |                                                                                                                                                                                                                                                                                                                                            |
| EPI_ISL_3216581                                                                                                                                                                                                                                                                                                                                                                                                                                                                                                                                                                                                                                                                                                                                                                                                                                                                                                                                                                                                                                                                                                                                                                                                                                                                                                                                                                                                                                                                                                                                                                                                                                                                                                                                                                                                                                                                                                                                             | Dinkes Provinsi Kalimantan Timur                                                                                                    | National Institute of Health Research and Development                                                                                                                                                                                                                                                                                                                                                                                                                                                                                                                                                                                                                                                                                                                                                                                                                                                                                                                 | Arie Ardiansyah Nugraha; Fajar Nur Sulistyohadi; Hana Aparsi Pawestri; Hartanti Dian Ikawati; Kartika Dewi Puspa; Krisna Pangesti; Nelly Puspandari; Subangkit; Triyani Soekarso; Vivi Setiawaty                                                                                                                                           |
| EPI_ISL_961730                                                                                                                                                                                                                                                                                                                                                                                                                                                                                                                                                                                                                                                                                                                                                                                                                                                                                                                                                                                                                                                                                                                                                                                                                                                                                                                                                                                                                                                                                                                                                                                                                                                                                                                                                                                                                                                                                                                                              | Dipartimento Prevenzione Avezzano-Servizio Igiene epidemiologia Sanità Pubblica                                                     | Istituto Zooprofilattico Sperimentale dell'Abruzzo e Molise "G. Caporale"                                                                                                                                                                                                                                                                                                                                                                                                                                                                                                                                                                                                                                                                                                                                                                                                                                                                                             | Ancora M; Calistri P; Cammà C; Curini V; Di Domenico M; Di Pasquale A; Lorusso A; Mangone I; Marccacci M; Puglia I; Rinaldi A; Savini G; Scialabba S                                                                                                                                                                                       |
| EPI_ISL_3260944                                                                                                                                                                                                                                                                                                                                                                                                                                                                                                                                                                                                                                                                                                                                                                                                                                                                                                                                                                                                                                                                                                                                                                                                                                                                                                                                                                                                                                                                                                                                                                                                                                                                                                                                                                                                                                                                                                                                             | Dipartimento di Medicina di Laboratorio, Azienda sanitaria universitaria Friuli Centrale (ASU FC)                                   | Dipartimento di Medicina di Laboratorio, Azienda sanitaria universitaria Friuli Centrale (ASU FC)                                                                                                                                                                                                                                                                                                                                                                                                                                                                                                                                                                                                                                                                                                                                                                                                                                                                     | Catia Mio; Chiara Dal Secco; Corrado Pipan; Francesco Curcio; Stefania Marzinotto                                                                                                                                                                                                                                                          |
| EPI_ISL_1112248, EPI_ISL_1112289                                                                                                                                                                                                                                                                                                                                                                                                                                                                                                                                                                                                                                                                                                                                                                                                                                                                                                                                                                                                                                                                                                                                                                                                                                                                                                                                                                                                                                                                                                                                                                                                                                                                                                                                                                                                                                                                                                                            | Dipartimento di Scienze Biomediche e Oncologia Umana - Azienda Ospedaliero Universitaria Consorziata Policlinico                    | Istituto Zooprofilattico Sperimentale della Puglia e della Basilicata                                                                                                                                                                                                                                                                                                                                                                                                                                                                                                                                                                                                                                                                                                                                                                                                                                                                                                 | Bianco A.; Capozzi L.; Chironna M.; Del Sambro L.; Loconsole D.; Parisi A.; Sallustio A.; Simone D.                                                                                                                                                                                                                                        |
| EPI_ISL_6564980                                                                                                                                                                                                                                                                                                                                                                                                                                                                                                                                                                                                                                                                                                                                                                                                                                                                                                                                                                                                                                                                                                                                                                                                                                                                                                                                                                                                                                                                                                                                                                                                                                                                                                                                                                                                                                                                                                                                             | Directia de Sanatate Publica Neamt                                                                                                  | "Stefan cel Mare" University Metagenomics Lab                                                                                                                                                                                                                                                                                                                                                                                                                                                                                                                                                                                                                                                                                                                                                                                                                                                                                                                         | Gheorghita Puscaselu Roxana; Lobiuc Andrei                                                                                                                                                                                                                                                                                                 |
| EPI_ISL_1228623, EPI_ISL_1408957, EPI_ISL_1622445, EPI_ISL_1622469, EPI_ISL_1622470, EPI_ISL_1934828, EPI_ISL_1936629, EPI_ISL_2161124                                                                                                                                                                                                                                                                                                                                                                                                                                                                                                                                                                                                                                                                                                                                                                                                                                                                                                                                                                                                                                                                                                                                                                                                                                                                                                                                                                                                                                                                                                                                                                                                                                                                                                                                                                                                                      | see above                                                                                                                           | Division of Emerging Infectious Diseases, Bureau of Infectious Diseases Diagnosis Control, Korea Disease Control and Prevention Agency                                                                                                                                                                                                                                                                                                                                                                                                                                                                                                                                                                                                                                                                                                                                                                                                                                | Ae Kyung Park; Chae Young Lee; Eun-Jin Kim; Heui Man Kim; Il-Hwan Kim; Jeong-Ah Kim; Jeong-Ah Kim; Jeong-Min Kim; Jin Sun No                                                                                                                                                                                                               |
| EPI_ISL_413024                                                                                                                                                                                                                                                                                                                                                                                                                                                                                                                                                                                                                                                                                                                                                                                                                                                                                                                                                                                                                                                                                                                                                                                                                                                                                                                                                                                                                                                                                                                                                                                                                                                                                                                                                                                                                                                                                                                                              | Division of Infectious Diseases, University Hospital Zurich                                                                         | Institute of Medical Virology, University of Zurich                                                                                                                                                                                                                                                                                                                                                                                                                                                                                                                                                                                                                                                                                                                                                                                                                                                                                                                   | Alexandra Trkola; Andrea Zbinden; Fiona Steiner; Gabriela Ziltener; Jon Huder; Jürg Böni; Maryam Zaheri; Michael Huber; Patrick Redli; Riccarda Capaul; Roberto Speck; Stefan Schmutz; Verena Kufner                                                                                                                                       |
| EPI_ISL_3191321, EPI_ISL_3191322                                                                                                                                                                                                                                                                                                                                                                                                                                                                                                                                                                                                                                                                                                                                                                                                                                                                                                                                                                                                                                                                                                                                                                                                                                                                                                                                                                                                                                                                                                                                                                                                                                                                                                                                                                                                                                                                                                                            | Division of Microbiology, Osaka Institute of Public Health                                                                          | Division of Microbiology, Osaka Institute of Public Health                                                                                                                                                                                                                                                                                                                                                                                                                                                                                                                                                                                                                                                                                                                                                                                                                                                                                                            | Haruyo Mori; Jun Ogasawara; Kazushi Motomura; Kentaro Itokawa; Makoto Kuroda; Masanori Hashino; Rina Tanaka; Ryuji Kawahara; Saeko Morikawa; Satoshi Hiroi; Tsuyoshi Sekizuka                                                                                                                                                              |
| EPI_ISL_412869, EPI_ISL_412870, EPI_ISL_412871, EPI_ISL_412872, EPI_ISL_412873                                                                                                                                                                                                                                                                                                                                                                                                                                                                                                                                                                                                                                                                                                                                                                                                                                                                                                                                                                                                                                                                                                                                                                                                                                                                                                                                                                                                                                                                                                                                                                                                                                                                                                                                                                                                                                                                              | Division of Viral Diseases, Center for Laboratory Control of Infectious Diseases, Korea Centers for Diseases Control and Prevention | Division of Viral Diseases, Center for Laboratory Control of Infectious Diseases, Korea Centers for Diseases Control and Prevention                                                                                                                                                                                                                                                                                                                                                                                                                                                                                                                                                                                                                                                                                                                                                                                                                                   | Heui Man Kim; Hye-Jun Jo; Jeong-Min Kim; Mi-Seon Kim; Myung Guk Han; Namjoo Lee; Sang Hee Woo; Sehee Park; Yoon-Seok Chung                                                                                                                                                                                                                 |
| EPI_ISL_3276224, EPI_ISL_3276229, EPI_ISL_3276236, EPI_ISL_3276240, EPI_ISL_3276246, EPI_ISL_3276254                                                                                                                                                                                                                                                                                                                                                                                                                                                                                                                                                                                                                                                                                                                                                                                                                                                                                                                                                                                                                                                                                                                                                                                                                                                                                                                                                                                                                                                                                                                                                                                                                                                                                                                                                                                                                                                        | Dr S raju, Director of public heath and preventive medicine                                                                         | inStem NCBS - INSACOG                                                                                                                                                                                                                                                                                                                                                                                                                                                                                                                                                                                                                                                                                                                                                                                                                                                                                                                                                 | Uma Ramakrishnan Dasaradhi Palakodeti Aswin SaiNarain                                                                                                                                                                                                                                                                                      |
| EPI_ISL_418811                                                                                                                                                                                                                                                                                                                                                                                                                                                                                                                                                                                                                                                                                                                                                                                                                                                                                                                                                                                                                                                                                                                                                                                                                                                                                                                                                                                                                                                                                                                                                                                                                                                                                                                                                                                                                                                                                                                                              | Dr. Georges-L. Dumont University Hospital Centre                                                                                    | National Microbiology Laboratory                                                                                                                                                                                                                                                                                                                                                                                                                                                                                                                                                                                                                                                                                                                                                                                                                                                                                                                                      | Anna Majer; Grace Seo; Guillaume Desnoyers; Matthew Gilmour; Morag Graham; Natalie Knox; Nathalie Bastien; Philip Mabon; Richard Garceau; Shari Tyson; Timothy Booth; Yan Li                                                                                                                                                               |
| EPI_ISL_495067                                                                                                                                                                                                                                                                                                                                                                                                                                                                                                                                                                                                                                                                                                                                                                                                                                                                                                                                                                                                                                                                                                                                                                                                                                                                                                                                                                                                                                                                                                                                                                                                                                                                                                                                                                                                                                                                                                                                              | Dr. N. D. Desai Medical College & Hospital                                                                                          | Gujarat Biotechnology Research Centre                                                                                                                                                                                                                                                                                                                                                                                                                                                                                                                                                                                                                                                                                                                                                                                                                                                                                                                                 | A M Kadri; Afzal Ansari; Apurvasinh Puvar; Chaitanya Joshi; Dinesh Kumar; Harsh Bakshi; J G Buch; Janvi Ravali; Jigar Gusani; Komal Patel; Labdhi Pandya; Madhvi Joshi; Maharshi Pandya; Monika Gandhi; Nidhi Patel; Nikha Trivedi; Nitin Savaliya; Pinal Trivedi; R D Dixit; Raghawendra Kumar; Supreet Prabhu; Zarna Patel; Zuber Saayed |
| EPI_ISL_3183997                                                                                                                                                                                                                                                                                                                                                                                                                                                                                                                                                                                                                                                                                                                                                                                                                                                                                                                                                                                                                                                                                                                                                                                                                                                                                                                                                                                                                                                                                                                                                                                                                                                                                                                                                                                                                                                                                                                                             | Dr. Risch Ostschweiz AG                                                                                                             | Microbiology, Dr. Risch University of Otago                                                                                                                                                                                                                                                                                                                                                                                                                                                                                                                                                                                                                                                                                                                                                                                                                                                                                                                           | Nadia Wohlwend                                                                                                                                                                                                                                                                                                                             |
| EPI_ISL_417212                                                                                                                                                                                                                                                                                                                                                                                                                                                                                                                                                                                                                                                                                                                                                                                                                                                                                                                                                                                                                                                                                                                                                                                                                                                                                                                                                                                                                                                                                                                                                                                                                                                                                                                                                                                                                                                                                                                                              | Dunedin Hospital                                                                                                                    | University of Otago                                                                                                                                                                                                                                                                                                                                                                                                                                                                                                                                                                                                                                                                                                                                                                                                                                                                                                                                                   | B. Lawley; J. Grant; J. Ussher; M.E. Quiñones-Mateu; R. Harfoot                                                                                                                                                                                                                                                                            |
| EPI_ISL_414424, EPI_ISL_414425, EPI_ISL_414426, EPI_ISL_414428, EPI_ISL_414432, EPI_ISL_414433, EPI_ISL_414437, EPI_ISL_414443, EPI_ISL_414444, EPI_ISL_414445, EPI_ISL_414448, EPI_ISL_414449, EPI_ISL_414452, EPI_ISL_414456, EPI_ISL_414457, EPI_ISL_414460, EPI_ISL_414461, EPI_ISL_414462, EPI_ISL_414469, EPI_ISL_414470, EPI_ISL_414471, EPI_ISL_414530, EPI_ISL_414532, EPI_ISL_414535, EPI_ISL_414536, EPI_ISL_414541, EPI_ISL_414544, EPI_ISL_414549, EPI_ISL_414554, EPI_ISL_414555, EPI_ISL_414556, EPI_ISL_414558, EPI_ISL_414560, EPI_ISL_414562, EPI_ISL_414566, EPI_ISL_414567, EPI_ISL_414570, EPI_ISL_415471, EPI_ISL_415473, EPI_ISL_415474, EPI_ISL_415478, EPI_ISL_415481, EPI_ISL_415482, EPI_ISL_415484, EPI_ISL_415485, EPI_ISL_415488, EPI_ISL_415491, EPI_ISL_415492, EPI_ISL_415498, EPI_ISL_415503, EPI_ISL_415504, EPI_ISL_415505, EPI_ISL_415508, EPI_ISL_415510, EPI_ISL_415512, EPI_ISL_415513, EPI_ISL_415527, EPI_ISL_415528, EPI_ISL_415531, EPI_ISL_415532, EPI_ISL_415535, EPI_ISL_415567, EPI_ISL_2154261, EPI_ISL_2154291                                                                                                                                                                                                                                                                                                                                                                                                                                                                                                                                                                                                                                                                                                                                                                                                                                                                                            | see above                                                                                                                           | Anne van der Linden; Anemiek van der Eijk; Aura Timen; Bas Oude Munnink; Claudia Schapendonk; Corien Swaan; Corine Geurtsvankessel; David Nieuwenhuijse; Emmanuelle Munger; Irina Chestakova; Jeroen van Kampen; Jolanda Voermans; Madelief Mollers; Manon Haverkate; Marion Koopmans; Marjan Boter; Mark Pronk; Mart Stein; Pascal Lexmond; Reina Sikkema; Richard Molenkamp; Sandra Kengne Kanga Mobou; Stefan van Nieuwkoop; Thea Bestebroer; on behalf of the Dutch national COVID-19 response team.                                                                                                                                                                                                                                                                                                                                                                                                                                                              |                                                                                                                                                                                                                                                                                                                                            |
| EPI_ISL_1558563                                                                                                                                                                                                                                                                                                                                                                                                                                                                                                                                                                                                                                                                                                                                                                                                                                                                                                                                                                                                                                                                                                                                                                                                                                                                                                                                                                                                                                                                                                                                                                                                                                                                                                                                                                                                                                                                                                                                             | Dutch COVID-19 response team                                                                                                        | Medical Microbiology, Maastricht University Medical Centre                                                                                                                                                                                                                                                                                                                                                                                                                                                                                                                                                                                                                                                                                                                                                                                                                                                                                                            | Brian van der Veer*; Carmen Reunkens; Christian Hoebé; Erik Beuken; Jozef Dingemans*; Lieke van Alphen; Paul Savelkoul                                                                                                                                                                                                                     |
| EPI_ISL_547520, EPI_ISL_824009, EPI_ISL_1013628, EPI_ISL_1014281, EPI_ISL_1034983, EPI_ISL_1089618, EPI_ISL_1089680, EPI_ISL_1089884, EPI_ISL_1165787, EPI_ISL_1232350, EPI_ISL_1232605, EPI_ISL_1232742, EPI_ISL_1288081, EPI_ISL_1288133, EPI_ISL_1289253, EPI_ISL_1369790, EPI_ISL_1370661, EPI_ISL_1371453, EPI_ISL_1371495, EPI_ISL_1455948, EPI_ISL_1455969, EPI_ISL_1456462, EPI_ISL_1457202, EPI_ISL_1457450, EPI_ISL_1457590, EPI_ISL_1457610, EPI_ISL_1457693, EPI_ISL_1520597, EPI_ISL_1521144, EPI_ISL_1521787, EPI_ISL_1522124, EPI_ISL_1596089, EPI_ISL_1596120, EPI_ISL_1596183, EPI_ISL_1596551, EPI_ISL_1596706, EPI_ISL_1596953, EPI_ISL_1597043, EPI_ISL_1597136, EPI_ISL_1703454, EPI_ISL_1703463, EPI_ISL_1704938, EPI_ISL_1705096, EPI_ISL_1705263, EPI_ISL_1705276, EPI_ISL_1705603, EPI_ISL_1705663, EPI_ISL_1705717, EPI_ISL_1791726, EPI_ISL_1791758, EPI_ISL_1791839, EPI_ISL_1791891, EPI_ISL_1792003, EPI_ISL_1792098, EPI_ISL_1792527, EPI_ISL_1792545, EPI_ISL_1792674, EPI_ISL_1961223, EPI_ISL_1961254, EPI_ISL_1961661, EPI_ISL_1962136, EPI_ISL_1962242, EPI_ISL_1962264, EPI_ISL_1962641, EPI_ISL_2093492, EPI_ISL_2093516, EPI_ISL_2093597, EPI_ISL_2094304, EPI_ISL_2094333, EPI_ISL_2094404, EPI_ISL_2215749, EPI_ISL_2216302, EPI_ISL_2218466, EPI_ISL_2218578, EPI_ISL_2218647, EPI_ISL_2253272, EPI_ISL_2253277, EPI_ISL_2253278, EPI_ISL_3253283, EPI_ISL_3253289, EPI_ISL_3253292, EPI_ISL_3257451, EPI_ISL_3257503, EPI_ISL_3257599, EPI_ISL_3257613, EPI_ISL_3257794, EPI_ISL_3257822, EPI_ISL_3257914, EPI_ISL_3257979, EPI_ISL_3258030, EPI_ISL_3258336, EPI_ISL_3258372, EPI_ISL_3258397, EPI_ISL_3258400, EPI_ISL_3258413, EPI_ISL_3258474, EPI_ISL_3258705, EPI_ISL_3258743, EPI_ISL_3258750, EPI_ISL_3258874, EPI_ISL_3258932, EPI_ISL_3258937, EPI_ISL_3258984, EPI_ISL_3258986, EPI_ISL_3259028, EPI_ISL_3259035, EPI_ISL_3259043, EPI_ISL_3259047, EPI_ISL_3259208, EPI_ISL_3259336, EPI_ISL_3266661 | see above                                                                                                                           | Adam Meijer; AnneMarie van den Brandt; Annelies Kroneman; Bas van der Veer; Chantal Reusken; Dennis Schmitz; Dirk Eggink; Eunice Then; Florian Zwagemaker; Harry Venema; James Groot; Jeroen Cremer; Jolienke Hardeman; Karim Hajji; Kim Freeriks; Linda van de Nes; Lisa Wijsman; Lynn Aarts; Melissa van Tuij; Robert Kohl; Rynanne Jaarsma; Sanne Bos; Sharon van den Brink; Joerd Kuiling; on behalf of the national COVID-19 response team                                                                                                                                                                                                                                                                                                                                                                                                                                                                                                                       |                                                                                                                                                                                                                                                                                                                                            |
| EPI_ISL_1219461, EPI_ISL_1312390, EPI_ISL_1613700, EPI_ISL_2141897                                                                                                                                                                                                                                                                                                                                                                                                                                                                                                                                                                                                                                                                                                                                                                                                                                                                                                                                                                                                                                                                                                                                                                                                                                                                                                                                                                                                                                                                                                                                                                                                                                                                                                                                                                                                                                                                                          | E. Gulbja laboratorija                                                                                                              | Latvian Biomedical Research and Study Centre                                                                                                                                                                                                                                                                                                                                                                                                                                                                                                                                                                                                                                                                                                                                                                                                                                                                                                                          | Davids Fridmanis; Dmitrijs Perminovs; Elina Dimina; Guntars Zarins; Ivars Silamikelis; Janis Klovinis; Janis Pjalkovskis; Juris Pervoscikovs; Kaspars Megnis; Laila Silamikele; Lauma Freimane; Laura Ansona; Liga Birzniece; Mikus Gavars; Monta Ustinova; Nikita Zrelavs; Uga Dumpis; Una Krumina; Vita Rovite                           |
| EPI_ISL_1370145                                                                                                                                                                                                                                                                                                                                                                                                                                                                                                                                                                                                                                                                                                                                                                                                                                                                                                                                                                                                                                                                                                                                                                                                                                                                                                                                                                                                                                                                                                                                                                                                                                                                                                                                                                                                                                                                                                                                             | EHC MORGES                                                                                                                          | Laboratory of genomics and metagenomics, Institute of Microbiology, University Hospital Centre and University of Lausanne, Switzerland                                                                                                                                                                                                                                                                                                                                                                                                                                                                                                                                                                                                                                                                                                                                                                                                                                | Claire Bertelli; Damien Jacot; Gilbert Greub; Sébastien Aeby; Trestan Pilonnel                                                                                                                                                                                                                                                             |
| EPI_ISL_3259909, EPI_ISL_3259918                                                                                                                                                                                                                                                                                                                                                                                                                                                                                                                                                                                                                                                                                                                                                                                                                                                                                                                                                                                                                                                                                                                                                                                                                                                                                                                                                                                                                                                                                                                                                                                                                                                                                                                                                                                                                                                                                                                            | EHNV                                                                                                                                | Laboratory of genomics and metagenomics                                                                                                                                                                                                                                                                                                                                                                                                                                                                                                                                                                                                                                                                                                                                                                                                                                                                                                                               | Claire Bertelli; Damien Jacot; Gilbert Greub; Sébastien Aeby; Trestan Pilonnel                                                                                                                                                                                                                                                             |
| EPI_ISL_2877310                                                                                                                                                                                                                                                                                                                                                                                                                                                                                                                                                                                                                                                                                                                                                                                                                                                                                                                                                                                                                                                                                                                                                                                                                                                                                                                                                                                                                                                                                                                                                                                                                                                                                                                                                                                                                                                                                                                                             | EHPAD_IRA                                                                                                                           | National Reference Center for Viruses of Respiratory Infections, Institut Pasteur, Paris                                                                                                                                                                                                                                                                                                                                                                                                                                                                                                                                                                                                                                                                                                                                                                                                                                                                              | Angela Brisebarre; Camille Capel; Christophe Malabat; Corinne Maufrais; Etienne Simon-Lorière; Frédéric Lemoine; Louise Lefrançois; Marion Barbet; Maud Vanpeene; Méline Bizard; Sylvie Behillili; Sylvie Van der Werf; Vincent Enouf                                                                                                      |
| EPI_ISL_1811897, EPI_ISL_1811905, EPI_ISL_1811913, EPI_ISL_1812142, EPI_ISL_1812353, EPI_ISL_1812380, EPI_ISL_1812636, EPI_ISL_1812891, EPI_ISL_1813104, EPI_ISL_1813348, EPI_ISL_1813424, EPI_ISL_1813446, EPI_ISL_1813933, EPI_ISL_1814025, EPI_ISL_1814082, EPI_ISL_1814102, EPI_ISL_1814512, EPI_ISL_1814709, EPI_ISL_1815032, EPI_ISL_1815352, EPI_ISL_1815964, EPI_ISL_1815993, EPI_ISL_1816021, EPI_ISL_1816188, EPI_ISL_1816789, EPI_ISL_3215302, EPI_ISL_3215317, EPI_ISL_3215321, EPI_ISL_3215339, EPI_ISL_3215344, EPI_ISL_3215349, EPI_ISL_3215350, EPI_ISL_3215363, EPI_ISL_3215366, EPI_ISL_3215369, EPI_ISL_3215388, EPI_ISL_3215397, EPI_ISL_3215409, EPI_ISL_3215412, EPI_ISL_3215453, EPI_ISL_3215478, EPI_ISL_3215493, EPI_ISL_3215498, EPI_ISL_3215504, EPI_ISL_3215512, EPI_ISL_3215515, EPI_ISL_3215527, EPI_ISL_3215532, EPI_ISL_3215536, EPI_ISL_3215561, EPI_ISL_3215576, EPI_ISL_3215580, EPI_ISL_3215581, EPI_ISL_3215586, EPI_ISL_3215589, EPI_ISL_3215595, EPI_ISL_3215596, EPI_ISL_3215609, EPI_ISL_3215613, EPI_ISL_3215638, EPI_ISL_3215644, EPI_ISL_3215664, EPI_ISL_3215691, EPI_ISL_3215692, EPI_ISL_3215694, EPI_ISL_3215698, EPI_ISL_3215707, EPI_ISL_3215724, EPI_ISL_3215733, EPI_ISL_3215751, EPI_ISL_3215753, EPI_ISL_3215766, EPI_ISL_3215781, EPI_ISL_3215789, EPI_ISL_3215793, EPI_ISL_3215812, EPI_ISL_3215817, EPI_ISL_3215824, EPI_ISL_3215825                                                                                                                                                                                                                                                                                                                                                                                                                                                                                                                                                               | see above                                                                                                                           | Abigail Schnapper; Alexandre Bolze; Alice Summerfield; Angela Scioscia; Araz Majnoonian; Ashkan Hassani; Celena Andrade; Charlotte Rivera-García; Cheryl Anderson; Chip Schooley; Christine Mitchell + SEARCH; David Becker; David Pride; Efrén Sandoval; Elizabeth Cirulli; Fitri Carrissa Wijaya; Francisco Tanudjaja; Fred Wu; Geraint Levau; Greg Humphrey; Helena Tubb; James Lu + SEARCH; Jason Nguyen; Jimmy Ramirez; Kelly Schiabor Barrett; Laura Kohn; Magnus Isaksson; Marc Laurent; Marlene Flores; Megan Nguyen; Natasha Martin; Natasha Martin Cheryl Anderson; Nicole L Washington; Patricia Gonzalez-Zuniga; Rebecca Fielding-Miller; Rodolfo Salido; Ryan Cho; Sawyer Farmer; Sharon Reed; Sherry Wang; Simon White; Smruthi Karthikeyan; Sydney Morgan + Marni Jacobs + Celestine Magallanes + Holly Valentine + Louise C. Laurent + SEARCH; Tommy Valles + SEARCH; Tommy Valles + SEARCH; Tyler Cassens; Victor Cantu; Vinton Omaleki; William Lee |                                                                                                                                                                                                                                                                                                                                            |
| EPI_ISL_3182571, EPI_ISL_3183850, EPI_ISL_3183851, EPI_ISL_3183933, EPI_ISL_3183935                                                                                                                                                                                                                                                                                                                                                                                                                                                                                                                                                                                                                                                                                                                                                                                                                                                                                                                                                                                                                                                                                                                                                                                                                                                                                                                                                                                                                                                                                                                                                                                                                                                                                                                                                                                                                                                                         | Ehime Prefectural Institute of Public Health and Environmental Science                                                              | Ehime Prefectural Institute of Public Health and Environmental Science                                                                                                                                                                                                                                                                                                                                                                                                                                                                                                                                                                                                                                                                                                                                                                                                                                                                                                | Chihiro Nakanishi; Chitoshi Toyoshima; Hiromi Iwaki; Hiroto Shinomiya; Kentaro Itokawa; Makoto Kuroda; Masanori Hashino; Naritoshi Bandou; Noriko Aoki; Rina Tanaka; Tsuyoshi Sekizuka; Yasutaka Yamashita                                                                                                                                 |
| EPI_ISL_1495748, EPI_ISL_1671023                                                                                                                                                                                                                                                                                                                                                                                                                                                                                                                                                                                                                                                                                                                                                                                                                                                                                                                                                                                                                                                                                                                                                                                                                                                                                                                                                                                                                                                                                                                                                                                                                                                                                                                                                                                                                                                                                                                            | Elling group, Institute of Molecular Biotechnology (IMBA)                                                                           | Berghthaler laboratory, CeMM Research Center for Molecular Medicine of the Austrian Academy of Sciences                                                                                                                                                                                                                                                                                                                                                                                                                                                                                                                                                                                                                                                                                                                                                                                                                                                               | Andreas Berghthaler; Anna Schedl; Bekir Erguner; Benedikt Agerer; Christoph Bock; Fabian Amman; Jan Laine; Lukas Endler; Maelle Le Moing; Martin Senekowitsch; Michael Schuster; Petr Triska; Thomas Penz                                                                                                                                  |
| EPI_ISL_1009419, EPI_ISL_1444962                                                                                                                                                                                                                                                                                                                                                                                                                                                                                                                                                                                                                                                                                                                                                                                                                                                                                                                                                                                                                                                                                                                                                                                                                                                                                                                                                                                                                                                                                                                                                                                                                                                                                                                                                                                                                                                                                                                            | Erie County Public Health (ECPHL)                                                                                                   | University at Buffalo Genomics and Bioinformatics Core                                                                                                                                                                                                                                                                                                                                                                                                                                                                                                                                                                                                                                                                                                                                                                                                                                                                                                                | Alyssa Pohlman; Amanda Boccolucci; Brandon Marzullo; Donald Yergeau; Jennifer Surtees; Jonathan Bard; Natalie Lamb; Norma Nowak                                                                                                                                                                                                            |

|                                                                                                                                                                                                                                                                                                                                                                                                                                                                                                                                                                                                                                                                                                                                                                                                                                                                                                                                                                                                                                                                                                                                                                                                                                                                                                                                                                                                                                                                                                                                                                                                                                                                                                                                                                                                                                                                                                                                                                                                                                                                                                                                         |                                                                            |                                                                                                                                            |                                                                                                                                                                                                                                                                                                                                                                                                                                                                                                                                                                                                                                                                              |                                                                                                                                                                                                                                                                                                                                                                                                                                                                         |
|-----------------------------------------------------------------------------------------------------------------------------------------------------------------------------------------------------------------------------------------------------------------------------------------------------------------------------------------------------------------------------------------------------------------------------------------------------------------------------------------------------------------------------------------------------------------------------------------------------------------------------------------------------------------------------------------------------------------------------------------------------------------------------------------------------------------------------------------------------------------------------------------------------------------------------------------------------------------------------------------------------------------------------------------------------------------------------------------------------------------------------------------------------------------------------------------------------------------------------------------------------------------------------------------------------------------------------------------------------------------------------------------------------------------------------------------------------------------------------------------------------------------------------------------------------------------------------------------------------------------------------------------------------------------------------------------------------------------------------------------------------------------------------------------------------------------------------------------------------------------------------------------------------------------------------------------------------------------------------------------------------------------------------------------------------------------------------------------------------------------------------------------|----------------------------------------------------------------------------|--------------------------------------------------------------------------------------------------------------------------------------------|------------------------------------------------------------------------------------------------------------------------------------------------------------------------------------------------------------------------------------------------------------------------------------------------------------------------------------------------------------------------------------------------------------------------------------------------------------------------------------------------------------------------------------------------------------------------------------------------------------------------------------------------------------------------------|-------------------------------------------------------------------------------------------------------------------------------------------------------------------------------------------------------------------------------------------------------------------------------------------------------------------------------------------------------------------------------------------------------------------------------------------------------------------------|
| EPI_ISL_614271                                                                                                                                                                                                                                                                                                                                                                                                                                                                                                                                                                                                                                                                                                                                                                                                                                                                                                                                                                                                                                                                                                                                                                                                                                                                                                                                                                                                                                                                                                                                                                                                                                                                                                                                                                                                                                                                                                                                                                                                                                                                                                                          | Eurofins                                                                   | National Reference Center for Viruses of Respiratory Infections, Institut Pasteur, Paris                                                   | Angela Brisebarre; Camille Capel; Etienne Simon-Lorière; Marion Barbet; Maud Vanpeene; Méline Bizard; Sylvie Behillil; Sylvie van der Werf; Vincent Enouf                                                                                                                                                                                                                                                                                                                                                                                                                                                                                                                    |                                                                                                                                                                                                                                                                                                                                                                                                                                                                         |
| EPI_ISL_3246280, EPI_ISL_3246283                                                                                                                                                                                                                                                                                                                                                                                                                                                                                                                                                                                                                                                                                                                                                                                                                                                                                                                                                                                                                                                                                                                                                                                                                                                                                                                                                                                                                                                                                                                                                                                                                                                                                                                                                                                                                                                                                                                                                                                                                                                                                                        | Eurofins Diatherix                                                         | Hudsonalpha Genome Sequencing Center                                                                                                       | Ada Stewart; Jane Grimwood; Jenell Webber; Jennifer Cart; John Lovell; Joshua Stough; Leslie Malone; Lori H. Handley; Melissa Williams; Stefan Brzezinski; Teresa Jones; and Jeremy Schmutz                                                                                                                                                                                                                                                                                                                                                                                                                                                                                  |                                                                                                                                                                                                                                                                                                                                                                                                                                                                         |
| EPI_ISL_3920039, EPI_ISL_3920059                                                                                                                                                                                                                                                                                                                                                                                                                                                                                                                                                                                                                                                                                                                                                                                                                                                                                                                                                                                                                                                                                                                                                                                                                                                                                                                                                                                                                                                                                                                                                                                                                                                                                                                                                                                                                                                                                                                                                                                                                                                                                                        | Eurofins Labazur Bretagne Châteauain                                       | National Reference Center for Viruses of Respiratory Infections, Institut Pasteur, Paris                                                   | Angela Brisebarre; Brieuc Gestin; Camille Capel; Christophe Malabat; Corinne Maufrais; Etienne Simon-Lorière; Frédéric Lemoine; Hub de Bioinformatique et Biostatistique; Louise Lefrançois; Marion Barbet; Maud Vanpeene; Méline Bizard; Sylvie Behillil; Sylvie Van der Werf; Vincent Enouf                                                                                                                                                                                                                                                                                                                                                                                |                                                                                                                                                                                                                                                                                                                                                                                                                                                                         |
| EPI_ISL_1285845, EPI_ISL_1570038, EPI_ISL_1570059, EPI_ISL_1570124, EPI_ISL_1570127, EPI_ISL_1570150, EPI_ISL_1571347, EPI_ISL_1722826, EPI_ISL_1845836, EPI_ISL_2110734                                                                                                                                                                                                                                                                                                                                                                                                                                                                                                                                                                                                                                                                                                                                                                                                                                                                                                                                                                                                                                                                                                                                                                                                                                                                                                                                                                                                                                                                                                                                                                                                                                                                                                                                                                                                                                                                                                                                                                | see above                                                                  | Eurofins LifeCodexx GmbH                                                                                                                   | Robert Koch Institute                                                                                                                                                                                                                                                                                                                                                                                                                                                                                                                                                                                                                                                        |                                                                                                                                                                                                                                                                                                                                                                                                                                                                         |
| EPI_ISL_1640761                                                                                                                                                                                                                                                                                                                                                                                                                                                                                                                                                                                                                                                                                                                                                                                                                                                                                                                                                                                                                                                                                                                                                                                                                                                                                                                                                                                                                                                                                                                                                                                                                                                                                                                                                                                                                                                                                                                                                                                                                                                                                                                         | Eurofins MVZ Labor Gelsenkirchen                                           | Robert Koch Institute                                                                                                                      |                                                                                                                                                                                                                                                                                                                                                                                                                                                                                                                                                                                                                                                                              |                                                                                                                                                                                                                                                                                                                                                                                                                                                                         |
| EPI_ISL_2790545                                                                                                                                                                                                                                                                                                                                                                                                                                                                                                                                                                                                                                                                                                                                                                                                                                                                                                                                                                                                                                                                                                                                                                                                                                                                                                                                                                                                                                                                                                                                                                                                                                                                                                                                                                                                                                                                                                                                                                                                                                                                                                                         | Eurofins-NMDL                                                              | Eurofins-NMDL                                                                                                                              | Alexandra Hansen; Anco Molijn; Anne Vogel; Bram Weijers; Chantal Schenker; Chinmoy Saha; Chris van Koppen; Coen de Jong; Cornel Brouwer; Diviana Lakker; Enes Sekerci; Glenn Bohms; Goyaert Roosen; Hamza Saleem; Humaira Yousaf; Iman El-Irdrioui; Jelmer Eerland; Jorian Flik; Katja Plathan; Laura Weijenberg; Layonel Jacobus; Lidá Cen; Lisa Dreesens; Madhavi Kharagitsing; Marisol Williams; Mark de Jong; Marvin Ruiter; Mathijs Wielen; Maurine Leversteijn-van Hall; Melek Aras; Nienke Meijer; Ramon Koers; Rens Driel; Rosalie Van der Stap; Roussjan Amir; Roy Masius; Senay Ozturk; Simon Lansu; Thierry Janssens; Thomas van der Toorn; Tobias van der Heijde |                                                                                                                                                                                                                                                                                                                                                                                                                                                                         |
| EPI_ISL_1823679                                                                                                                                                                                                                                                                                                                                                                                                                                                                                                                                                                                                                                                                                                                                                                                                                                                                                                                                                                                                                                                                                                                                                                                                                                                                                                                                                                                                                                                                                                                                                                                                                                                                                                                                                                                                                                                                                                                                                                                                                                                                                                                         | FL Bureau of Public Health Laboratories-Tampa                              | Centers for Disease Control and Prevention Division of Viral Diseases, Pathogen Discovery                                                  | Alison Laufer Halpin; Ben L. Rambo-Martin; Clinton R. Paden; Dakota Howard; Darlene Wagner; Dave Wentworth; Dhvani Batra; Jasmine Padilla; Justin Lee; Katie Dillon; Krista Queen; Kristen Knipe; Kristine Lacey; Mark Burroughs; Matthew Schmerer; Mili Sheth; Peter Cook; Sam Shepard; Sarah Nobles; Shoshona Le; Suxiang Tong; Vivien Dugan; Yvette Unoarumhi                                                                                                                                                                                                                                                                                                             |                                                                                                                                                                                                                                                                                                                                                                                                                                                                         |
| EPI_ISL_3230769, EPI_ISL_3230782, EPI_ISL_3230787                                                                                                                                                                                                                                                                                                                                                                                                                                                                                                                                                                                                                                                                                                                                                                                                                                                                                                                                                                                                                                                                                                                                                                                                                                                                                                                                                                                                                                                                                                                                                                                                                                                                                                                                                                                                                                                                                                                                                                                                                                                                                       | FORTEBIO - UNILABS                                                         | CHU Poitiers                                                                                                                               | Agnes BEBY-DEFAUX; Birama N'DIAYE; Caroline MICHAUD; Magali GARCIA; Manon PRAT; Maxime PICHON; Nicolas LEVEQUE; Valentin BON-BARET                                                                                                                                                                                                                                                                                                                                                                                                                                                                                                                                           |                                                                                                                                                                                                                                                                                                                                                                                                                                                                         |
| EPI_ISL_418252                                                                                                                                                                                                                                                                                                                                                                                                                                                                                                                                                                                                                                                                                                                                                                                                                                                                                                                                                                                                                                                                                                                                                                                                                                                                                                                                                                                                                                                                                                                                                                                                                                                                                                                                                                                                                                                                                                                                                                                                                                                                                                                          | FUNDACION JIMENEZ DIAZ                                                     | Instituto de Salud Carlos III                                                                                                              | A. Monzón; F. Casas; I. Fernández Roblas, R.; I. Jiménez; Iglesias-Caballero; M. Camarero; M. Cuesta; M. González-Esguevillas; M. Molinero Calamita; M. Zaballos; P. Jiménez; S. Juliá; S. Pozo; S. Varona                                                                                                                                                                                                                                                                                                                                                                                                                                                                   |                                                                                                                                                                                                                                                                                                                                                                                                                                                                         |
| EPI_ISL_3230553, EPI_ISL_3230554, EPI_ISL_3230585, EPI_ISL_3230600, EPI_ISL_3230692                                                                                                                                                                                                                                                                                                                                                                                                                                                                                                                                                                                                                                                                                                                                                                                                                                                                                                                                                                                                                                                                                                                                                                                                                                                                                                                                                                                                                                                                                                                                                                                                                                                                                                                                                                                                                                                                                                                                                                                                                                                     | Fimlab Laboratoriot Oy Tampere                                             | Expert Microbiology, National Institute for Health and Welfare                                                                             | Carita Savolainen-Kopra; Erika Lindh; Haider al-Hello; Jani Hakilahti; Kirsi Liitsola; Niina Ikonen; Olli Vapalahti; Pekka Ellonen; Phuoc Truong; Päivi Laurila; Ravi Kant; Sari Hannula; Soile Blomqvist; Teemu Smura                                                                                                                                                                                                                                                                                                                                                                                                                                                       |                                                                                                                                                                                                                                                                                                                                                                                                                                                                         |
| EPI_ISL_495351, EPI_ISL_1651500, EPI_ISL_1651501, EPI_ISL_6565456, EPI_ISL_6565463, EPI_ISL_6565467, EPI_ISL_6565486, EPI_ISL_6565550, EPI_ISL_6565559, EPI_ISL_6565563, EPI_ISL_6565586, EPI_ISL_6565602, EPI_ISL_6565608, EPI_ISL_6565645, EPI_ISL_6565655, EPI_ISL_6565657, EPI_ISL_6565730, EPI_ISL_6565896, EPI_ISL_6566193, EPI_ISL_6566203, EPI_ISL_6566220, EPI_ISL_6566224, EPI_ISL_6566226, EPI_ISL_6566230, EPI_ISL_6566289                                                                                                                                                                                                                                                                                                                                                                                                                                                                                                                                                                                                                                                                                                                                                                                                                                                                                                                                                                                                                                                                                                                                                                                                                                                                                                                                                                                                                                                                                                                                                                                                                                                                                                  | see above                                                                  | Florida Bureau of Public Health Laboratories                                                                                               | Jason Blanton; Namratha Tarigopula; Sarah Schmedes; Tiffany Splatt                                                                                                                                                                                                                                                                                                                                                                                                                                                                                                                                                                                                           |                                                                                                                                                                                                                                                                                                                                                                                                                                                                         |
| EPI_ISL_541301                                                                                                                                                                                                                                                                                                                                                                                                                                                                                                                                                                                                                                                                                                                                                                                                                                                                                                                                                                                                                                                                                                                                                                                                                                                                                                                                                                                                                                                                                                                                                                                                                                                                                                                                                                                                                                                                                                                                                                                                                                                                                                                          | Florida Bureau of Public Health Laboratories, Florida Department of Health | Florida Bureau of Public Health Laboratories, Florida Department of Health                                                                 | Blanton, J.; Schmedes, S.                                                                                                                                                                                                                                                                                                                                                                                                                                                                                                                                                                                                                                                    |                                                                                                                                                                                                                                                                                                                                                                                                                                                                         |
| EPI_ISL_631563                                                                                                                                                                                                                                                                                                                                                                                                                                                                                                                                                                                                                                                                                                                                                                                                                                                                                                                                                                                                                                                                                                                                                                                                                                                                                                                                                                                                                                                                                                                                                                                                                                                                                                                                                                                                                                                                                                                                                                                                                                                                                                                          | Flushing Hospital Medical Center                                           | New York City Public Health Laboratory                                                                                                     | Jade Wang; et al.                                                                                                                                                                                                                                                                                                                                                                                                                                                                                                                                                                                                                                                            |                                                                                                                                                                                                                                                                                                                                                                                                                                                                         |
| EPI_ISL_1547638                                                                                                                                                                                                                                                                                                                                                                                                                                                                                                                                                                                                                                                                                                                                                                                                                                                                                                                                                                                                                                                                                                                                                                                                                                                                                                                                                                                                                                                                                                                                                                                                                                                                                                                                                                                                                                                                                                                                                                                                                                                                                                                         | Foerde Hospital, Department of Microbiology                                | Norwegian Institute of Public Health, Department of Virology                                                                               | Atiya R Ali; Debech Nadia; Engebretsen Serina Beate; Garcia Lorente Ignacio; Hilde Elshaug; Hilde Vollan; Jon Bråte; Kamilla Heddeland Insteffjord; Karoline Bragstad; Kathrine Stene-Johansen; Marie Paulsen Madsen; Olav Hungnes; Pedersen Benedikte Nevjen; Rasmus Riis Kopperud                                                                                                                                                                                                                                                                                                                                                                                          |                                                                                                                                                                                                                                                                                                                                                                                                                                                                         |
| EPI_ISL_3244790                                                                                                                                                                                                                                                                                                                                                                                                                                                                                                                                                                                                                                                                                                                                                                                                                                                                                                                                                                                                                                                                                                                                                                                                                                                                                                                                                                                                                                                                                                                                                                                                                                                                                                                                                                                                                                                                                                                                                                                                                                                                                                                         | Fondazione IRCCS Ca' Granda Ospedale Maggiore Policlinico                  | Fondazione IRCCS Ca' Granda Ospedale Maggiore Policlinico                                                                                  | Ferruccio Ceriotti; Sara Uceda Renteria                                                                                                                                                                                                                                                                                                                                                                                                                                                                                                                                                                                                                                      |                                                                                                                                                                                                                                                                                                                                                                                                                                                                         |
| EPI_ISL_413587                                                                                                                                                                                                                                                                                                                                                                                                                                                                                                                                                                                                                                                                                                                                                                                                                                                                                                                                                                                                                                                                                                                                                                                                                                                                                                                                                                                                                                                                                                                                                                                                                                                                                                                                                                                                                                                                                                                                                                                                                                                                                                                          | Foundation Elisabeth-Tweesteden Ziekenhuis                                 | Erasmus Medical Center                                                                                                                     | Anne van der Linden; Anнемiek van der Eijk; Aura Timen; Bas Oude Munnink; Claudia Schapendonk; Corien Swaan; Corine GeurtsvanKessel; David Nieuwenhuijsse; Irina Chestakova; Jeroen van Kampen; Jolanda Voermans; Madelief Mollers; Manon Haverkate; Marion Koopmans; Mark Pronk; Mart Stein; Pascal Lexmond; Reina Sikkema; Richard Lexmond; Sandra Kengne Kamga Mbou; on behalf of the Dutch national COVID-19 response team.                                                                                                                                                                                                                                              |                                                                                                                                                                                                                                                                                                                                                                                                                                                                         |
| EPI_ISL_411066, EPI_ISL_431785, EPI_ISL_3006797                                                                                                                                                                                                                                                                                                                                                                                                                                                                                                                                                                                                                                                                                                                                                                                                                                                                                                                                                                                                                                                                                                                                                                                                                                                                                                                                                                                                                                                                                                                                                                                                                                                                                                                                                                                                                                                                                                                                                                                                                                                                                         | Fujian Center for Disease Control and Prevention                           | Fujian Center for Disease Control and Prevention                                                                                           | Chen Wei; He Wenxiang; Huang Zhimiao; Lin Qi; Weng Yuwei; Zhang Yanhua                                                                                                                                                                                                                                                                                                                                                                                                                                                                                                                                                                                                       |                                                                                                                                                                                                                                                                                                                                                                                                                                                                         |
| EPI_ISL_480126                                                                                                                                                                                                                                                                                                                                                                                                                                                                                                                                                                                                                                                                                                                                                                                                                                                                                                                                                                                                                                                                                                                                                                                                                                                                                                                                                                                                                                                                                                                                                                                                                                                                                                                                                                                                                                                                                                                                                                                                                                                                                                                          | Fukui Prefectural Institute of Public Health and Environmental Science     | Pathogen Genomics Center, National Institute of Infectious Diseases                                                                        | Hajime Kamiya; Kentaro Itokawa; Makoto Kuroda; Masanori Hashino; Miho Toho; Motoi Suzuki; Rina Tanaka; Tsuyoshi Sekizuka                                                                                                                                                                                                                                                                                                                                                                                                                                                                                                                                                     |                                                                                                                                                                                                                                                                                                                                                                                                                                                                         |
| EPI_ISL_2015078, EPI_ISL_3191458, EPI_ISL_3191476, EPI_ISL_3191477, EPI_ISL_3191490, EPI_ISL_3191503, EPI_ISL_3191517, EPI_ISL_3191565, EPI_ISL_3191587, EPI_ISL_3191600, EPI_ISL_3191609, EPI_ISL_3191615, EPI_ISL_3191618, EPI_ISL_3191621, EPI_ISL_3191630, EPI_ISL_3191631, EPI_ISL_3191649, EPI_ISL_3191650, EPI_ISL_3191669, EPI_ISL_3191865, EPI_ISL_3191879, EPI_ISL_3191889, EPI_ISL_3191901, EPI_ISL_3191933, EPI_ISL_3191939, EPI_ISL_3191941, EPI_ISL_3191981, EPI_ISL_3191982, EPI_ISL_3192006, EPI_ISL_3192012, EPI_ISL_3192018, EPI_ISL_3192034, EPI_ISL_3192036, EPI_ISL_3199870, EPI_ISL_3199874, EPI_ISL_3199884, EPI_ISL_3199909, EPI_ISL_3199916, EPI_ISL_3199933, EPI_ISL_3199943, EPI_ISL_3199958, EPI_ISL_3199959, EPI_ISL_3200009, EPI_ISL_3200012                                                                                                                                                                                                                                                                                                                                                                                                                                                                                                                                                                                                                                                                                                                                                                                                                                                                                                                                                                                                                                                                                                                                                                                                                                                                                                                                                              | see above                                                                  | Fukuoka Institute of Health and Environmental Sciences                                                                                     | Akira Ohishi; Asako Nakamura; Chiharu Katamune; Hiroaki Shigemura; Ikumi Sato; Kentaro Itokawa; Makoto Kuroda; Masanori Hashino; Mitsuhiro Hamasaki; Rina Tanaka; Saori Ueda; Takayuki Kobayashi; Tsuyoshi Sekizuka; Yoshiki Etoh; Yuki Ashizuka; Yuki Carl                                                                                                                                                                                                                                                                                                                                                                                                                  |                                                                                                                                                                                                                                                                                                                                                                                                                                                                         |
| EPI_ISL_684644, EPI_ISL_684665, EPI_ISL_684689, EPI_ISL_684690, EPI_ISL_687537, EPI_ISL_689495, EPI_ISL_690445, EPI_ISL_690986, EPI_ISL_692226, EPI_ISL_692228, EPI_ISL_692445                                                                                                                                                                                                                                                                                                                                                                                                                                                                                                                                                                                                                                                                                                                                                                                                                                                                                                                                                                                                                                                                                                                                                                                                                                                                                                                                                                                                                                                                                                                                                                                                                                                                                                                                                                                                                                                                                                                                                          | see above                                                                  | Fukuoka Institute of Health and Environmental Sciences                                                                                     | Kentaro Itokawa; Makoto Kuroda; Masanori Hashino; Rina Tanaka; Tsuyoshi Sekizuka                                                                                                                                                                                                                                                                                                                                                                                                                                                                                                                                                                                             |                                                                                                                                                                                                                                                                                                                                                                                                                                                                         |
| EPI_ISL_3199076, EPI_ISL_3199077, EPI_ISL_3199079, EPI_ISL_3199087, EPI_ISL_3199093, EPI_ISL_3199109                                                                                                                                                                                                                                                                                                                                                                                                                                                                                                                                                                                                                                                                                                                                                                                                                                                                                                                                                                                                                                                                                                                                                                                                                                                                                                                                                                                                                                                                                                                                                                                                                                                                                                                                                                                                                                                                                                                                                                                                                                    | Fukushima Prefectural Institute of Public Health                           | Fukushima Prefectural Institute of Public Health                                                                                           | Kaduzhiro Kitakawa; Kazunori Suzuki; Kentaro Itokawa; Makoto Kuroda; Masanori Hashino; Naoko Kashiwabara; Rie Suzuki; Rina Tanaka; Shohei Fujita; Tsuyoshi Sekizuka                                                                                                                                                                                                                                                                                                                                                                                                                                                                                                          |                                                                                                                                                                                                                                                                                                                                                                                                                                                                         |
| EPI_ISL_1458142, EPI_ISL_1458274, EPI_ISL_1458908, EPI_ISL_1460614, EPI_ISL_1525594, EPI_ISL_1525733, EPI_ISL_1555470, EPI_ISL_1555590, EPI_ISL_1555715, EPI_ISL_1556223, EPI_ISL_1556357, EPI_ISL_1556718, EPI_ISL_1556950, EPI_ISL_1613342, EPI_ISL_1614356, EPI_ISL_1614619, EPI_ISL_1614886, EPI_ISL_1665956, EPI_ISL_1666052, EPI_ISL_1666311, EPI_ISL_1666376, EPI_ISL_1666512, EPI_ISL_1666528, EPI_ISL_1666964, EPI_ISL_1733780, EPI_ISL_1734327, EPI_ISL_1734366, EPI_ISL_1734432, EPI_ISL_1992626, EPI_ISL_1992633, EPI_ISL_1993187, EPI_ISL_2038057, EPI_ISL_2038697, EPI_ISL_2043560, EPI_ISL_2043785, EPI_ISL_2133993, EPI_ISL_2134061, EPI_ISL_3208195, EPI_ISL_3208305, EPI_ISL_3208354, EPI_ISL_3208434, EPI_ISL_3208585, EPI_ISL_3208650, EPI_ISL_3208713, EPI_ISL_3208729, EPI_ISL_3208734, EPI_ISL_3208771, EPI_ISL_3208775, EPI_ISL_3208921, EPI_ISL_3209063, EPI_ISL_3209566, EPI_ISL_3209587, EPI_ISL_3209710, EPI_ISL_3209742, EPI_ISL_3209744, EPI_ISL_3209844, EPI_ISL_3209850, EPI_ISL_3209855, EPI_ISL_3209862, EPI_ISL_3209919, EPI_ISL_3210020, EPI_ISL_3210146, EPI_ISL_3210164, EPI_ISL_3210242, EPI_ISL_3210660, EPI_ISL_3210838, EPI_ISL_3210945, EPI_ISL_3210965, EPI_ISL_3210980, EPI_ISL_3211087, EPI_ISL_3211088, EPI_ISL_3211092, EPI_ISL_3211347, EPI_ISL_3211741, EPI_ISL_3211891, EPI_ISL_3211894, EPI_ISL_3211957, EPI_ISL_3211996, EPI_ISL_3212129, EPI_ISL_3212146, EPI_ISL_3212250, EPI_ISL_3212359, EPI_ISL_3212487, EPI_ISL_3212586, EPI_ISL_3212625, EPI_ISL_3212643, EPI_ISL_3212655, EPI_ISL_4367960, EPI_ISL_4368218, EPI_ISL_4368323, EPI_ISL_4368487, EPI_ISL_4369153, EPI_ISL_4369223, EPI_ISL_4369237, EPI_ISL_4369249, EPI_ISL_4369383, EPI_ISL_4369620, EPI_ISL_4369518, EPI_ISL_4369725, EPI_ISL_4370078, EPI_ISL_4370131, EPI_ISL_4370426, EPI_ISL_4370451, EPI_ISL_4370476, EPI_ISL_4370507, EPI_ISL_4370519, EPI_ISL_4370634, EPI_ISL_4370711, EPI_ISL_4370831, EPI_ISL_4371003, EPI_ISL_4371033, EPI_ISL_4371082, EPI_ISL_4371170, EPI_ISL_4371199, EPI_ISL_4371260, EPI_ISL_4371581, EPI_ISL_4371627, EPI_ISL_4371841, EPI_ISL_4371966, EPI_ISL_4372103, EPI_ISL_4372519 | see above                                                                  | Fulgent Genetics                                                                                                                           | Centers for Disease Control and Prevention Division of Viral Diseases, Pathogen Discovery                                                                                                                                                                                                                                                                                                                                                                                                                                                                                                                                                                                    | Adrian Paskey; Becky Tsai; Benafsh Sapra; Benjamin Rambo-Martin; Christopher Gulvick; Clinton Paden; Clinton R. Paden; Dakota Howard; Darlene Wagner; Dhvani Batra; Doreen Ng; Duncan MacCannell; Erisa Salla; Hury Gao; James Xie; Jason Caravas; John Gao; Joseph Fierro; Kara Moser; Kristine Lacey; Matthew Schmerer; Mickey Li; Peter Cook; Peter W. Cook; Scott Sammons; Shatavia Morrison; Tymeckia Kendall; Victoria Caban Figueroa; Yan Meng; Yvette Unoarumhi |
| EPI_ISL_1251895, EPI_ISL_1317355, EPI_ISL_1578682, EPI_ISL_3229922                                                                                                                                                                                                                                                                                                                                                                                                                                                                                                                                                                                                                                                                                                                                                                                                                                                                                                                                                                                                                                                                                                                                                                                                                                                                                                                                                                                                                                                                                                                                                                                                                                                                                                                                                                                                                                                                                                                                                                                                                                                                      | Furst Medical Laboratory                                                   | Norwegian Institute of Public Health, Department of Virology                                                                               | Atiya R Ali; Debech Nadia; Engebretsen Serina Beate; Garcia Lorente Ignacio; Hilde Elshaug; Hilde Vollan; Jon Bråte; Kamilla Heddeland Insteffjord; Karoline Bragstad; Kathrine Stene-Johansen; Line Victoria Moen; Marie Paulsen Madsen; Olav Hungnes; Pedersen Benedikte Nevjen; Rasmus Riis Kopperud                                                                                                                                                                                                                                                                                                                                                                      |                                                                                                                                                                                                                                                                                                                                                                                                                                                                         |
| EPI_ISL_1422587, EPI_ISL_1620651, EPI_ISL_3231810, EPI_ISL_3231860                                                                                                                                                                                                                                                                                                                                                                                                                                                                                                                                                                                                                                                                                                                                                                                                                                                                                                                                                                                                                                                                                                                                                                                                                                                                                                                                                                                                                                                                                                                                                                                                                                                                                                                                                                                                                                                                                                                                                                                                                                                                      | GA Department of Public Health                                             | GA Department of Public Health                                                                                                             | Aliyah Fields; Cynthia Dixey; Jonathan Edwards; Sharmila Talekar; Stacy Reeves; Taylor Smith; Tonia Parrott                                                                                                                                                                                                                                                                                                                                                                                                                                                                                                                                                                  |                                                                                                                                                                                                                                                                                                                                                                                                                                                                         |
| EPI_ISL_1755063                                                                                                                                                                                                                                                                                                                                                                                                                                                                                                                                                                                                                                                                                                                                                                                                                                                                                                                                                                                                                                                                                                                                                                                                                                                                                                                                                                                                                                                                                                                                                                                                                                                                                                                                                                                                                                                                                                                                                                                                                                                                                                                         | GH A.CHENEVIER-H.MONDOR                                                    | Department of Virology, Henri Mondor University Hospital, Assistance Publique Hôpitaux de Paris, Université Paris-Est Créteil, INSERM U955 | Alexandre Soulier; Christophe Rodriguez; Elisabeth Trawinski; Guillaume Gricourt; Jean-Michel Pawlotsky; Melissa N'Debi; Slim Fourati; Vanessa Demontant                                                                                                                                                                                                                                                                                                                                                                                                                                                                                                                     |                                                                                                                                                                                                                                                                                                                                                                                                                                                                         |
| EPI_ISL_1821834                                                                                                                                                                                                                                                                                                                                                                                                                                                                                                                                                                                                                                                                                                                                                                                                                                                                                                                                                                                                                                                                                                                                                                                                                                                                                                                                                                                                                                                                                                                                                                                                                                                                                                                                                                                                                                                                                                                                                                                                                                                                                                                         | GH JOFFRE DUPUYTREN                                                        | Department of Virology, Henri Mondor University Hospital, Assistance Publique Hôpitaux de Paris, Université Paris-Est Créteil, INSERM U955 | Alexandre Soulier; Christophe Rodriguez; Elisabeth Trawinski; Guillaume Gricourt; Jean-Michel Pawlotsky; Melissa N'Debi; Slim Fourati; Vanessa Demontant                                                                                                                                                                                                                                                                                                                                                                                                                                                                                                                     |                                                                                                                                                                                                                                                                                                                                                                                                                                                                         |
| EPI_ISL_418416                                                                                                                                                                                                                                                                                                                                                                                                                                                                                                                                                                                                                                                                                                                                                                                                                                                                                                                                                                                                                                                                                                                                                                                                                                                                                                                                                                                                                                                                                                                                                                                                                                                                                                                                                                                                                                                                                                                                                                                                                                                                                                                          | GH Les Portes du Sud                                                       | CNR Virus des Infections Respiratoires - France SUD                                                                                        | Alexandre Gaymard; Antonin Bal; Bruno Lina; Carine Moustaud; Florence Morfin-Sherpa; Gregory Destras; Gwendolyne Burfin; Laurence Josset; Martine Valette; Maude Bouscambert-Duchamp; Raphaëlle Lamy; Solenne Brun                                                                                                                                                                                                                                                                                                                                                                                                                                                           |                                                                                                                                                                                                                                                                                                                                                                                                                                                                         |
| EPI_ISL_4954439, EPI_ISL_4954512                                                                                                                                                                                                                                                                                                                                                                                                                                                                                                                                                                                                                                                                                                                                                                                                                                                                                                                                                                                                                                                                                                                                                                                                                                                                                                                                                                                                                                                                                                                                                                                                                                                                                                                                                                                                                                                                                                                                                                                                                                                                                                        | GHC Genetics                                                               | Prague 8                                                                                                                                   | GHC Genetics                                                                                                                                                                                                                                                                                                                                                                                                                                                                                                                                                                                                                                                                 |                                                                                                                                                                                                                                                                                                                                                                                                                                                                         |
| EPI_ISL_2152519                                                                                                                                                                                                                                                                                                                                                                                                                                                                                                                                                                                                                                                                                                                                                                                                                                                                                                                                                                                                                                                                                                                                                                                                                                                                                                                                                                                                                                                                                                                                                                                                                                                                                                                                                                                                                                                                                                                                                                                                                                                                                                                         | GHEF Grand Hôpital Est Francilien                                          | Department of Virology, Henri Mondor University Hospital,                                                                                  | Alexandre Soulier; Christophe Rodriguez; Elisabeth Trawinski; Guillaume Gricourt; Jean-Michel Pawlotsky; Melissa N'Debi; Slim Fourati; Vanessa Demontant                                                                                                                                                                                                                                                                                                                                                                                                                                                                                                                     |                                                                                                                                                                                                                                                                                                                                                                                                                                                                         |

|                                                                                                                                                                                                                                                                                                                                                                                      |                                                                                                                                                                      |                                                                                                                                                                                                                            |                                                                                                                                                                                                                                                                                                                                                |
|--------------------------------------------------------------------------------------------------------------------------------------------------------------------------------------------------------------------------------------------------------------------------------------------------------------------------------------------------------------------------------------|----------------------------------------------------------------------------------------------------------------------------------------------------------------------|----------------------------------------------------------------------------------------------------------------------------------------------------------------------------------------------------------------------------|------------------------------------------------------------------------------------------------------------------------------------------------------------------------------------------------------------------------------------------------------------------------------------------------------------------------------------------------|
|                                                                                                                                                                                                                                                                                                                                                                                      |                                                                                                                                                                      | Assistance Publique Hôpitaux de Paris, Université Paris-Est Créteil, INSERM U955                                                                                                                                           |                                                                                                                                                                                                                                                                                                                                                |
| EPI_ISL_2779304                                                                                                                                                                                                                                                                                                                                                                      | GK Prison Busia (Matayo)Matayos Prison                                                                                                                               | USAMRD-A. Basic Science Laboratory                                                                                                                                                                                         | Alan Lemtudo; Beth Mutai; Brian Andika; Carol Kifude; Clement Masakwe; Eric Muthanje; Esther Omuseni; Faith Sigei; Gathii Kimita; George Awinda; John Waitumbi; Josphat Nyataya; Rachel Githii; Rehema Liyai; Stephen Ochola                                                                                                                   |
| EPI_ISL_586563                                                                                                                                                                                                                                                                                                                                                                       | GMERS GMERS Medical College and Hospital, Junagadh                                                                                                                   | Gujarat Biotechnology Research Centre                                                                                                                                                                                      | A M Kadri; Afzal Ansari; Apurvasinh Puvar; Bhavesh Bagda; Chaitanya Joshi; Dinesh Kumar; Harsh Bakshi; Janvi Raval; Komal Patel; Labdhi Pandya; Madhvi Joshi; Maharshi Pandya; Monika Gandhi; Nidhi Patel; Nikha Trivedi; Nitin Savaliya; Pinal Trivedi; R D Dixit; Raghawendra Kumar; Ravi Dedaniya; Zarna Patel; Zuber Saiyed                |
| EPI_ISL_476861                                                                                                                                                                                                                                                                                                                                                                       | GMERS Medical College & Hospital, Gotri, Vadodara                                                                                                                    | Gujarat Biotechnology Research Centre                                                                                                                                                                                      | A M Kadri; Afzal Ansari; Apurvasinh Puvar; Chaitanya Joshi; Dinesh Kumar; Harsh Bakshi; Janvi Raval; Komal Patel; Labdhi Pandya; Madhvi Joshi; Maharshi Pandya; Meenakshi Shah; Monika Gandhi; Neena Doshi; Nidhi Patel; Nikha Trivedi; Nitin Savaliya; Pinal Trivedi; R D Dixit; Raghawendra Kumar; Varsha Godbole; Zarna Patel; Zuber Saiyed |
| EPI_ISL_1677746                                                                                                                                                                                                                                                                                                                                                                      | GMERS Medical College and Hospital, Gotri                                                                                                                            | Gujarat Biotechnology Research Centre                                                                                                                                                                                      | Bithika Duttaroy; Chaitanya Joshi; Dinesh Kumar; Janvi Raval; Madhvi Joshi; Nitesh Shah; Nitin Savaliya; Ramesh Pandit; Sonal Sharma; Twinkle Soni; Umang Mishra; Zarna Patel; Zuber Saiyed                                                                                                                                                    |
| EPI_ISL_2001124                                                                                                                                                                                                                                                                                                                                                                      | GMERS, Government Medical College, Gandhinagar                                                                                                                       | Gujarat Biotechnology Research Centre                                                                                                                                                                                      | Chaitanya Joshi; Dinesh Kumar; Gaurishankar Shrimali; Janvi Raval; Madhvi Joshi; Nitesh Shah; Nitin Savaliya; Ramesh Pandit; Sonal Sharma; Twinkle Soni; Umang Mishra; Zarna Patel; Zuber Saiyed                                                                                                                                               |
| EPI_ISL_3066431                                                                                                                                                                                                                                                                                                                                                                      | GMERS, Government Medical College, Himmatnagar                                                                                                                       | Gujarat Biotechnology Research Centre                                                                                                                                                                                      | Chaitanya Joshi; Dinesh Kumar; Himanshu Khatri; Janvi Raval; Madhvi Joshi; Nitesh Shah; Nitin Savaliya; Ramesh Pandit; Sonal Sharma; Twinkle Soni; Umang Mishra; Zarna Patel; Zuber Saiyed                                                                                                                                                     |
| EPI_ISL_1754787                                                                                                                                                                                                                                                                                                                                                                      | GROUPE HOSPITALIER SUD ILE DE FRANCE                                                                                                                                 | Department of Virology, Henri Mondor University Hospital, Assistance Publique Hôpitaux de Paris, Université Paris-Est Créteil, INSERM U955                                                                                 | Alexandre Soulier; Christophe Rodriguez; Elisabeth Trawinski; Guillaume Gricourt; Jean-Michel Pawlotsky; Melissa N'Debi; Slim Fourati; Vanessa Demontant                                                                                                                                                                                       |
| EPI_ISL_3243260, EPI_ISL_3243262, EPI_ISL_3243268, EPI_ISL_3243275, EPI_ISL_3243279, EPI_ISL_3243324                                                                                                                                                                                                                                                                                 | Gandhi Hospital                                                                                                                                                      | CDFD                                                                                                                                                                                                                       | Ashwin Dalal; Asmita Gupta; Divya Vashisht; Murali Bashyam; Nagamani Kammili; Reelina Basu; Vinay Donipadi                                                                                                                                                                                                                                     |
| EPI_ISL_6575141, EPI_ISL_6575150, EPI_ISL_6575168, EPI_ISL_6575181, EPI_ISL_6575184, EPI_ISL_6575210, EPI_ISL_6575212, EPI_ISL_6575219, EPI_ISL_6575237, EPI_ISL_6575241, EPI_ISL_6575259, EPI_ISL_6575261, EPI_ISL_6575267, EPI_ISL_6575268, EPI_ISL_6575273, EPI_ISL_6575281, EPI_ISL_6575282, EPI_ISL_6575287, EPI_ISL_6575301                                                    | Genepath, Pune                                                                                                                                                       | RF-IISER Pune                                                                                                                                                                                                              | Aurnab Ghose; Joy Merwin Monteiro; Krishanpal Karmodiya; Nikhil Phadke; Shatakshi Ranade                                                                                                                                                                                                                                                       |
| EPI_ISL_2681409                                                                                                                                                                                                                                                                                                                                                                      | General Hospital "8th of September"                                                                                                                                  | Laboratory of virology and molecular diagnostics, Institute of Public Health                                                                                                                                               | Boshevskva G; Janchevska E.; Kuzmanovska M                                                                                                                                                                                                                                                                                                     |
| EPI_ISL_3020343                                                                                                                                                                                                                                                                                                                                                                      | General Hospital Tetovo                                                                                                                                              | Laboratory of virology and molecular diagnostics, Institute of Public Health                                                                                                                                               | Boshevskva G; Janchevska E.; Kuzmanovska M                                                                                                                                                                                                                                                                                                     |
| EPI_ISL_406798, EPI_ISL_406801                                                                                                                                                                                                                                                                                                                                                       | General Hospital of Central Theater Command of People's Liberation Army of China                                                                                     | BGI & Institute of Microbiology, Chinese Academy of Sciences & Shandong First Medical University & Shandong Academy of Medical Sciences & General Hospital of Central Theater Command of People's Liberation Army of China | Weifeng Shi and Zhenhong Hu; Weijun Chen; Yuhai Bi                                                                                                                                                                                                                                                                                             |
| EPI_ISL_1167674, EPI_ISL_1534593, EPI_ISL_1541063, EPI_ISL_1712322, EPI_ISL_3185386, EPI_ISL_3185395, EPI_ISL_3185436, EPI_ISL_3185445, EPI_ISL_3185457, EPI_ISL_3185488, EPI_ISL_3185502, EPI_ISL_3185546, EPI_ISL_3185595, EPI_ISL_3185623, EPI_ISL_3185669, EPI_ISL_3185800, EPI_ISL_3220035, EPI_ISL_3220047, EPI_ISL_3220051, EPI_ISL_3220070, EPI_ISL_3220085, EPI_ISL_3220090 | see above                                                                                                                                                            | Genetica Molecular and Subdepartamento de Virologia ISP Chile                                                                                                                                                              | Instituto de Salud Publica de Chile                                                                                                                                                                                                                                                                                                            |
| EPI_ISL_1578111                                                                                                                                                                                                                                                                                                                                                                      | Genome Analysis Center, Yamanashi Central Hospital                                                                                                                   | Genome Analysis Center, Yamanashi Central Hospital                                                                                                                                                                         | Yosuke Hirotsu                                                                                                                                                                                                                                                                                                                                 |
| EPI_ISL_3232509, EPI_ISL_3236196, EPI_ISL_3244783, EPI_ISL_3244786                                                                                                                                                                                                                                                                                                                   | Genome Information Research Center, Research Institute for Microbial Diseases, Osaka University                                                                      | Genome Information Research Center, Research Institute for Microbial Diseases, Osaka University                                                                                                                            | Daisuke Motooka; Hiroya Oki; Kentaro Tanaka; and Shota Nakamura                                                                                                                                                                                                                                                                                |
| EPI_ISL_3215963                                                                                                                                                                                                                                                                                                                                                                      | Genomica Lab Molecular, Mexico                                                                                                                                       | Andersen lab at Scripps Research                                                                                                                                                                                           | Jose Horacio Reyna Verdugo; Jose Roman Chavez Mendez; Luis Alberto Rangel Gonzalez; Martin Gonzalez Ibarra; SEARCH Alliance San Diego with Jonathan Gonzalez Garcia                                                                                                                                                                            |
| EPI_ISL_3208105                                                                                                                                                                                                                                                                                                                                                                      | Genomik Solidaritas Indonesia Laboratorium                                                                                                                           | Genomik Solidaritas Indonesia Laboratorium                                                                                                                                                                                 | Annisa Muthiah Sukirman; Anuraj Shankar; Ariel Pradipta; Gracia Felias Enos Korompis; Meutia Ayuputeri Kumaheri; Reinhart Gabriel; Vania Gavriala Wikasa                                                                                                                                                                                       |
| EPI_ISL_3690058, EPI_ISL_3762778, EPI_ISL_3762797, EPI_ISL_3769263, EPI_ISL_3791564, EPI_ISL_3980646, EPI_ISL_3981339, EPI_ISL_4035723, EPI_ISL_7369154, EPI_ISL_7369353, EPI_ISL_7379480                                                                                                                                                                                            | see above                                                                                                                                                            | Gibraltar Health Authority Lab                                                                                                                                                                                             | Gibraltar Health Authority Covid-19 Laboratory                                                                                                                                                                                                                                                                                                 |
| EPI_ISL_746101                                                                                                                                                                                                                                                                                                                                                                       | Ginkgo Bioworks Clinical Laboratory                                                                                                                                  | Utah Public Health Laboratory                                                                                                                                                                                              | Alex Plocik; Becky Schilling; Birgitte Simen; David R. Hillyard; E. Susan Slechta; Erin L. Young; James McGann; Jeffrey B. Stevenson; Jim Griffin; Keith Robison; Kelly Oakeson; Malaika McKenzie-Bennett; Martha Pierson; Melanie A. Mallory; Michael T. Pyne; Michelle Spencer; Rebecca Littlefield; Salika M. Shakir; Tara Gallagher        |
| EPI_ISL_3242314, EPI_ISL_3242325, EPI_ISL_3242349, EPI_ISL_3242352, EPI_ISL_3242356                                                                                                                                                                                                                                                                                                  | Goa Medical College                                                                                                                                                  | CDFD                                                                                                                                                                                                                       | Ashwin Dalal; Asmita Gupta; Divya Vashisht; Murali Bashyam; Reelina Basu; Savio Rodrigues; Vinay Donipadi                                                                                                                                                                                                                                      |
| EPI_ISL_415152                                                                                                                                                                                                                                                                                                                                                                       | Gorgas Memorial Institute for Health Studies                                                                                                                         | Gorgas Memorial Institute for Health Studies                                                                                                                                                                               | Alexander A. Martinez.; Ambar Moreno; Claudia Gonzalez; Danilo Franco; Elimelec Valdespino; Juan M. Pascalle; Leyda Abrego; Oris Chavarria; Sandra Lopez-Verges; Yamilka Diaz                                                                                                                                                                  |
| EPI_ISL_5196194, EPI_ISL_5196210, EPI_ISL_5196217, EPI_ISL_5196272, EPI_ISL_5196344                                                                                                                                                                                                                                                                                                  | Gorgas Memorial Institute of Health Studies                                                                                                                          | Gorgas Memorial Institute of Health Studies                                                                                                                                                                                | Castillo Jorge; Chen Maria; Franco Danilo; Gonzalez Claudia; Jessica Gondola; Leyda Abrego; Lopez-Verges Sandra; Marlene Castillo; Martinez Alexander; Menacho Abdiel; Moreno Ambar; Moreno Brechla; Oris Chavarria; Ortiz Alma; Salazar Jacqueline                                                                                            |
| EPI_ISL_1502936, EPI_ISL_4744467, EPI_ISL_4744482, EPI_ISL_4744487, EPI_ISL_4744510, EPI_ISL_4744624                                                                                                                                                                                                                                                                                 | Gorgas Memorial Laboratory of Health Studies                                                                                                                         | Gorgas Memorial Laboratory of Health Studies                                                                                                                                                                               | Castillo Jorge; Chen Maria; Franco Danilo; Gonzalez Claudia; Jessica Gondola; Leyda Abrego; Lopez-Verges Sandra; Marlene Castillo; Martinez Alexander; Menacho Abdiel; Moreno Ambar; Moreno Brechla; Oris Chavarria; Ortiz Alma; Salazar Jacqueline                                                                                            |
| EPI_ISL_3242291, EPI_ISL_586554                                                                                                                                                                                                                                                                                                                                                      | Government Fever Hospital Government Hospital,Veraval                                                                                                                | CDFD                                                                                                                                                                                                                       | Ashwin Dalal; Asmita Gupta; Divya Vashisht; Murali Bashyam; Nagamani Kammili; Reelina Basu; Vinay Donipadi                                                                                                                                                                                                                                     |
| EPI_ISL_1544190                                                                                                                                                                                                                                                                                                                                                                      | Government Medical College (GMC), Surat                                                                                                                              | Gujarat Biotechnology Research Centre                                                                                                                                                                                      | Chaitanya Joshi; Dinesh Kumar; Janvi Raval; Madhvi Joshi; Neeta Khandelwal; Nitesh Shah; Nitin Savaliya; Ramesh Pandit; Sonal Sharma; Twinkle Soni; Umang Mishra; Zarna Patel; Zuber Saiyed                                                                                                                                                    |
| EPI_ISL_1302715, EPI_ISL_1534304, EPI_ISL_1706714                                                                                                                                                                                                                                                                                                                                    | Gravity Diagnostics Groote Schuur Hospital wc GSH Groupe LCD                                                                                                         | Kentucky State Public Health Lab NHLS/UCT                                                                                                                                                                                  | Joshua Tobias; Karim George; Matthew Johnson; Rachel Zinner; Rhonda Lucas; Stephanie Lunn; Vaneet Arora; William Grooms                                                                                                                                                                                                                        |
|                                                                                                                                                                                                                                                                                                                                                                                      |                                                                                                                                                                      | Department of Virology, Henri Mondor University Hospital, Assistance Publique Hôpitaux de Paris, Université Paris-Est Créteil, INSERM U955                                                                                 | Alexandre Soulier; Christophe Rodriguez; Elisabeth Trawinski; Guillaume Gricourt; Jean-Michel Pawlotsky; Melissa N'Debi; Slim Fourati; Vanessa Demontant                                                                                                                                                                                       |
| EPI_ISL_2603146                                                                                                                                                                                                                                                                                                                                                                      | Grupo de Investigación en Enfermedades Tropicales del Ejército (GINETEJ), Laboratorio de Referencia e Investigación, Dirección de Sanidad Ejército, Bogotá, Colombia | Centro de Investigaciones en Microbiología y Biotecnología-UR (CIMBIUR), Facultad de Ciencias Naturales, Universidad del                                                                                                   | Camilo A. Correa-Cárdenas; Carolina Oliveros; Claudia Méndez; Elizabeth K. Márquez; Frank de los Santos Ortiz; Juan David Ramírez; Julie Pérez; Lorena Albarracín; Luz H. Patiño; María Clara Duque; Marina Muñoz; María Teresa Alvarado; Nathalia Ballesteros; Sergio Castañeda; Sergio Gutierrez-Riveros; Yanira Romero; Zulma Cucunubá      |

|                                                                                                                                                                                                                                                                                                                                                                                                                                                                                                                                                                                                                                                                                                        |                                                                                                                   |                                                                                                                        |                                                                                                                                                                                                                                                                                                                                                                                                                                                                                                               |
|--------------------------------------------------------------------------------------------------------------------------------------------------------------------------------------------------------------------------------------------------------------------------------------------------------------------------------------------------------------------------------------------------------------------------------------------------------------------------------------------------------------------------------------------------------------------------------------------------------------------------------------------------------------------------------------------------------|-------------------------------------------------------------------------------------------------------------------|------------------------------------------------------------------------------------------------------------------------|---------------------------------------------------------------------------------------------------------------------------------------------------------------------------------------------------------------------------------------------------------------------------------------------------------------------------------------------------------------------------------------------------------------------------------------------------------------------------------------------------------------|
| EPI_ISL_3241992, EPI_ISL_3242003                                                                                                                                                                                                                                                                                                                                                                                                                                                                                                                                                                                                                                                                       | Guam Public Health Laboratory                                                                                     | Rosario, Bogotá, Colombia<br>Centers for Disease Control and Prevention Division of Viral Diseases, Pathogen Discovery | Alex Burgin; Ben L. Rambo-Martin; Clinton R. Paden; Dakota Howard; Dave Wentworth; Dhvani Batra; Jasmine Padilla; Justin Lee; Krista Queen; Kristen Knipe; Kristine Lacek; Mark Burroughs; Matthew Schmerer; Meghan Bentz; Mili Sheth; Peter Cook; Sam Shepard; Sarah Nobles; Suxiang Tong; Vivien Dugan; Yvette Unoarumhi                                                                                                                                                                                    |
| EPI_ISL_403933, EPI_ISL_403934, EPI_ISL_403935, EPI_ISL_403936, EPI_ISL_403937                                                                                                                                                                                                                                                                                                                                                                                                                                                                                                                                                                                                                         | Guangdong Provincial Center for Diseases Control and Prevention; Guangdong Provincial Public Health               | Department of Microbiology, Guangdong Provincial Center for Diseases Control and Prevention                            | Baisheng Li; Changwen Ke; Feng Ruan; Guan hao He; Haojie Zhong; Huihong Deng; Jianfeng He; Jianpeng Xiao; Jianxiang Geng; Jianxiong Hu; Jie Wu; Jing Lu; Lifeng Lin; Lijun Liang; Lirong Zou; Min Kang; Qi Zhu; Shuijiang Mei; Songjian Xiao; Tao Liu; Tie Song; Weilin Zeng; Wenjun Ma; Xing Li; Xiujuan Tang; Xue Zhuang; Xuguang Chen; Ying Wang; Yingchao Song; Yingtao Zhang; Yuhuang Liao; Zhe Liu                                                                                                      |
| EPI_ISL_406534, EPI_ISL_406535                                                                                                                                                                                                                                                                                                                                                                                                                                                                                                                                                                                                                                                                         | Guangdong Provincial Center for Diseases Control and Prevention; Guangdong Provincial Public Health               | Guangdong Provincial Center for Diseases Control and Prevention                                                        | Baisheng Li; Changwen Ke; Feng Ruan; Guan hao He; Haojie Zhong; Huihong Deng; Jianfeng He; Jianpeng Xiao; Jianxiang Geng; Jianxiong Hu; Jie Wu; Jing Lu; Lifeng Lin; Lijun Liang; Lirong Zou; Min Kang; Qi Zhu; Shuijiang Mei; Songjian Xiao; Tao Liu; Tie Song; Weilin Zeng; Wenjun Ma; Xing Li; Xiujuan Tang; Xue Zhuang; Xuguang Chen; Ying Wang; Yingchao Song; Yingtao Zhang; Yuhuang Liao; Zhe Liu                                                                                                      |
| EPI_ISL_413851, EPI_ISL_413852, EPI_ISL_413856, EPI_ISL_413858, EPI_ISL_413861, EPI_ISL_413863, EPI_ISL_413864, EPI_ISL_413875, EPI_ISL_413884                                                                                                                                                                                                                                                                                                                                                                                                                                                                                                                                                         | Guangdong Provincial Institution of Public Health, Guangdong Provincial Center for Disease Control and Prevention | Guangdong Provincial Institution of Public Health                                                                      | Andrew Rambaut; Bo Peng; Changwen Ke; Chuming Liang; Huanying Zheng; Huifang Lin; Jing Lu; Jingju Peng; Jufeng Sun; Josh Quick; Juan Su; Kang Min; Kuibiao Li; Lilian Zeng; Liu Zhe; Louis du Plessis; Minfeng Liang; Moritz Kraemer; Nick Loman; Nuno Faria; Oliver Pybus; Pingping Zhou; Qianlin Xiong; Ru bai; Rulin Sun; Runyu Yuan; Sarah François; Shisong Fang; Song Tie; Tao Liu; Verity Hill; Wei Li; Wenjun Ma; Wenzhe Su; Xi Tang                                                                  |
| EPI_ISL_447543                                                                                                                                                                                                                                                                                                                                                                                                                                                                                                                                                                                                                                                                                         | Gujarat Biotechnology Research Centre                                                                             | Gujarat Biotechnology Research Centre                                                                                  | Akanksha Verma; Amit Kanani; Ankit Hinsu; Apurvashin Puvar; Bhavesh Modi; Binita Aring; Chaitanya Joshi; Dinesh Kumar; Dipa Kinarivala; Disha Patel; Gaurishankar Shirmali; Geeta Vaghela; Janvi Raval; Kairavi Joshi; Kamlesh J Upadhyay; Madhvi Joshi; Maharshi Pandya; Monika Gandhi; Neeta Khandelwal; Nidhi Sood; Nitin Savaliya; Pinal Trivedi; Pranay Shah; Pritesh Sabara; R D Dixit; Raghavendra Kumar; Ramesh Pandit; Sharmistha Majumdar; Snehal Bagatharia; Sonia Barve; Tejas Shah; Zuber Saiyed |
| EPI_ISL_418186                                                                                                                                                                                                                                                                                                                                                                                                                                                                                                                                                                                                                                                                                         | Gundersen Molecular Diagnostic Laboratory                                                                         | Kabara Cancer Research Institute                                                                                       | Craig S. Richmond & Paraic A. Kenny                                                                                                                                                                                                                                                                                                                                                                                                                                                                           |
| EPI_ISL_418184, EPI_ISL_418188                                                                                                                                                                                                                                                                                                                                                                                                                                                                                                                                                                                                                                                                         | Gundersen Molecular Diagnostics Laboratory                                                                        | Kabara Cancer Research Institute                                                                                       | Craig S. Richmond & Paraic A. Kenny                                                                                                                                                                                                                                                                                                                                                                                                                                                                           |
| EPI_ISL_684220, EPI_ISL_684268, EPI_ISL_684282                                                                                                                                                                                                                                                                                                                                                                                                                                                                                                                                                                                                                                                         | Gunma Prefectural Institute of Public Health and Environmental Sciences                                           | Pathogen Genomics Center, National Institute of Infectious Diseases                                                    | Kentaro Itokawa; Makoto Kuroda; Masanori Hashino; Rina Tanaka; Tsuyoshi Sekizuka                                                                                                                                                                                                                                                                                                                                                                                                                              |
| EPI_ISL_418007, EPI_ISL_418008, EPI_ISL_418019, EPI_ISL_418020, EPI_ISL_418021, EPI_ISL_418022, EPI_ISL_3204539                                                                                                                                                                                                                                                                                                                                                                                                                                                                                                                                                                                        | see above                                                                                                         | H Braga                                                                                                                | Instituto Nacional de Saude (INSA)<br>Borges et al; Guiomar et al                                                                                                                                                                                                                                                                                                                                                                                                                                             |
| EPI_ISL_1853717                                                                                                                                                                                                                                                                                                                                                                                                                                                                                                                                                                                                                                                                                        | H Divino Espirito Santo - Ponta Delgada                                                                           | Instituto Nacional de Saude (INSA)                                                                                     | Borges et al                                                                                                                                                                                                                                                                                                                                                                                                                                                                                                  |
| EPI_ISL_1500979, EPI_ISL_1500997, EPI_ISL_1501038, EPI_ISL_1501148, EPI_ISL_2629003                                                                                                                                                                                                                                                                                                                                                                                                                                                                                                                                                                                                                    | HEGP - Laboratoire de Virologie                                                                                   | HEGP - Laboratoire de Virologie                                                                                        | David Veyer; Hélène Péré; Julien Puech; Maxime Wack; Nicolas Robillard; Sandrine Imbeaud                                                                                                                                                                                                                                                                                                                                                                                                                      |
| EPI_ISL_1652537, EPI_ISL_1652570                                                                                                                                                                                                                                                                                                                                                                                                                                                                                                                                                                                                                                                                       | HELIX LLC                                                                                                         | WHO National Influenza Centre Russian Federation                                                                       | Andrey Komissarov; Anna Ivanova; Artem Fadeev; Daria Danilenko; Dmitry Lioznov; Elena Nabieva; Georgii Bazkin; Ksenia Safina; Kseniya Komissarova; Maria Pisareva; Maria Timofeeva; Tamila Musaveva; Veronika Eder                                                                                                                                                                                                                                                                                            |
| EPI_ISL_1678450, EPI_ISL_1678479, EPI_ISL_1965470                                                                                                                                                                                                                                                                                                                                                                                                                                                                                                                                                                                                                                                      | HG Pharma GmbH                                                                                                    | Bergthaler laboratory, CeMM Research Center for Molecular Medicine of the Austrian Academy of Sciences                 | Andreas Bergthaler; Anna Schedl; Bekir Erguner; Benedikt Agerer; Christoph Bock; Fabian Amman; Jan Laine; Lukas Endler; Maelle Le Moing; Martin Senekowitsch; Michael Schuster; Petr Triska; Thomas Penz                                                                                                                                                                                                                                                                                                      |
| EPI_ISL_3241955, EPI_ISL_3241964, EPI_ISL_3241966                                                                                                                                                                                                                                                                                                                                                                                                                                                                                                                                                                                                                                                      | HI Dept. of Health, State Laboratories Division                                                                   | Centers for Disease Control and Prevention Division of Viral Diseases, Pathogen Discovery                              | Alex Burgin; Ben L. Rambo-Martin; Clinton R. Paden; Dakota Howard; Dave Wentworth; Dhvani Batra; Jasmine Padilla; Justin Lee; Krista Queen; Kristen Knipe; Kristine Lacek; Mark Burroughs; Matthew Schmerer; Meghan Bentz; Mili Sheth; Peter Cook; Sam Shepard; Sarah Nobles; Suxiang Tong; Vivien Dugan; Yvette Unoarumhi                                                                                                                                                                                    |
| EPI_ISL_2017390, EPI_ISL_2187966, EPI_ISL_3254335, EPI_ISL_3254344, EPI_ISL_3254347, EPI_ISL_3254361, EPI_ISL_3254363, EPI_ISL_3254376, EPI_ISL_3254394, EPI_ISL_3254395, EPI_ISL_3254405, EPI_ISL_3254406, EPI_ISL_3254407, EPI_ISL_3254424, EPI_ISL_3254431, EPI_ISL_3254451, EPI_ISL_3254453, EPI_ISL_3254458, EPI_ISL_3254466, EPI_ISL_3254467, EPI_ISL_3254496, EPI_ISL_3254517, EPI_ISL_3254519, EPI_ISL_3254537, EPI_ISL_3254539, EPI_ISL_3254549, EPI_ISL_3254557, EPI_ISL_3254560, EPI_ISL_3254573, EPI_ISL_3254581, EPI_ISL_3254583, EPI_ISL_3254584, EPI_ISL_3254586, EPI_ISL_3254587, EPI_ISL_3254595, EPI_ISL_3254602, EPI_ISL_3254621, EPI_ISL_3254624, EPI_ISL_3254633, EPI_ISL_3254639 | see above                                                                                                         | HLAGYN - Laboratorio de Imunologia de Transplantes de Goias                                                            | HLAGYN - Laboratorio de Imunologia de Transplantes de Goias<br>Alessandro Leonardo Alvares Magalhaes; Daniel Ferreira de Sousa; Danielle de Paiva Rezende; Erika Lopes Rocha Batista; Fernando Antonio Vinhal dos Santos; Frederico Rodrigues Vinhal; Kamila Oliveira Reis De Freitas.; Lucas Carlos Gomes Pereira; Paola Cristina Resende Silva; Sabrina Sara Moreira Duarte                                                                                                                                 |
| EPI_ISL_2484783                                                                                                                                                                                                                                                                                                                                                                                                                                                                                                                                                                                                                                                                                        | HOME QUARANTINE TASKFORCE                                                                                         | Hong Kong Department of Health                                                                                         | Alan K.L. Tsang; Dominic N.C. Tsang; Edman T.K. Lam; Gannon C.K. Mak; Ken H.L. Ng; Peter C.W. Yip; Peter K.C. Cheng; Rickjason C.W. Chan                                                                                                                                                                                                                                                                                                                                                                      |
| EPI_ISL_2002633                                                                                                                                                                                                                                                                                                                                                                                                                                                                                                                                                                                                                                                                                        | HOPITAL DE MONTLUCON                                                                                              | CHU Clermont-Ferrand, service de virologie                                                                             | Bisseux Maxime; Combes Patricia; Henquell Cécile; Mirand Audrey                                                                                                                                                                                                                                                                                                                                                                                                                                               |
| EPI_ISL_1547447, EPI_ISL_1731477, EPI_ISL_2214753                                                                                                                                                                                                                                                                                                                                                                                                                                                                                                                                                                                                                                                      | HOPITAL DE VICHY                                                                                                  | CHU Clermont-Ferrand, service de virologie                                                                             | Bisseux Maxime; Combes Patricia; Henquell Cécile; Mirand Audrey                                                                                                                                                                                                                                                                                                                                                                                                                                               |
| EPI_ISL_1406574, EPI_ISL_1483759, EPI_ISL_2491628                                                                                                                                                                                                                                                                                                                                                                                                                                                                                                                                                                                                                                                      | HOPITAL DU MONT DORE                                                                                              | CHU Clermont-Ferrand, service de virologie                                                                             | Bisseux Maxime; Combes Patricia; Henquell Cécile; Mirand Audrey                                                                                                                                                                                                                                                                                                                                                                                                                                               |
| EPI_ISL_3267068                                                                                                                                                                                                                                                                                                                                                                                                                                                                                                                                                                                                                                                                                        | HOPITAL NOSTRA SENYORA MERITXELL                                                                                  | CHU Purpan - Laboratoire de Virologie - Institut Fédératif de Biologie                                                 | Boyer P.; Carcenac R.; Ferrer V.; Harter A.; Izopet J.; Jeanne N.; Latour J.; Ranger N.; Tremeau R.                                                                                                                                                                                                                                                                                                                                                                                                           |
| EPI_ISL_5450410                                                                                                                                                                                                                                                                                                                                                                                                                                                                                                                                                                                                                                                                                        | HOSPITAL BUKIT MERTAJAM                                                                                           | iPROMISE, UTM                                                                                                          | Ariza Adnan; Fadzilah Mohd Nor; Lim Wai Feng; Mohd Asif Mohd Sukri; Mohd Nur Fakhruzzaman Noorizhab; Mohd Zaki Salleh; Sazzli Shahlan Kassim; Siti Farah Alwani Mohd Naw; Siti Hamimah Sheikh Abdul Kadir; Teh Lay Kek; Wang Seok Mui                                                                                                                                                                                                                                                                         |
| EPI_ISL_3233299, EPI_ISL_3233302                                                                                                                                                                                                                                                                                                                                                                                                                                                                                                                                                                                                                                                                       | HOSPITAL COMARCAL DE MELILLA                                                                                      | Instituto de Salud Carlos III                                                                                          | A. Monzón; F. Casas; I. Jiménez; I.Roman, S.; Iglesias-Caballero; M. Sardonis; P. Zaballos; S. Camarero; S. Cuesta; S. Pozo; S. Varona; V. Vázquez-Morón                                                                                                                                                                                                                                                                                                                                                      |
| EPI_ISL_3262704                                                                                                                                                                                                                                                                                                                                                                                                                                                                                                                                                                                                                                                                                        | HOSPITAL DR. CARLOS LUIS VALVERDE VEGA                                                                            | Incienza, Instituto Costarricense de Investigación y Enseñanza en Nutrición y Salud                                    | Adriana Godínez; Claudio Soto-Garita; Estela Cordero; Francisco Duarte; Hebleen Porras; José Luis Vargas; Mariela Gutiérrez; Melany Calderón; Sofia Herrera & Melissa Wong Araya                                                                                                                                                                                                                                                                                                                              |
| EPI_ISL_418247                                                                                                                                                                                                                                                                                                                                                                                                                                                                                                                                                                                                                                                                                         | HOSPITAL GENERAL DE SEGOVIA                                                                                       | Instituto de Salud Carlos III                                                                                          | A. Monzón; F. Casas; I. Hernando-Real S.; I. Jiménez; Iglesias-Caballero; M. Camarero; M. Cuesta; M. González-Esguevillas; M. Molinero Calamita; M. Zaballos; P. Jiménez; S. Juliá; S. Pozo; S. Varona                                                                                                                                                                                                                                                                                                        |
| EPI_ISL_3233319, EPI_ISL_3260860                                                                                                                                                                                                                                                                                                                                                                                                                                                                                                                                                                                                                                                                       | HOSPITAL GENERAL NUESTRA SEÑORA DEL PRADO                                                                         | Instituto de Salud Carlos III                                                                                          | A. Monzón; ALICIA; F. Casas; I. BETETA LOPEZ; I. Jiménez; I.Beteta, A.; Iglesias-Caballero; M. Camarero; M. Sardonis; P. Zaballos; S. Camarero; S. Cuesta; S. Iglesias-Caballero; S. Pozo; S. Varona; Sardonis; V. Vázquez-Morón                                                                                                                                                                                                                                                                              |
| EPI_ISL_3260869                                                                                                                                                                                                                                                                                                                                                                                                                                                                                                                                                                                                                                                                                        | HOSPITAL GENERAL UNIVERSITARIO DE ALBACETE                                                                        | Instituto de Salud Carlos III                                                                                          | A. Monzón; CARIDAD; F. Casas; I. Jiménez; I. SAINZ DE BARANDA CAMINO; M. Camarero; P. Zaballos; S. Cuesta; S. Iglesias-Caballero; S. Pozo; S. Varona; Sardonis; V. Vázquez-Morón                                                                                                                                                                                                                                                                                                                              |
| EPI_ISL_3233326, EPI_ISL_3260849                                                                                                                                                                                                                                                                                                                                                                                                                                                                                                                                                                                                                                                                       | HOSPITAL GENERAL UNIVERSITARIO DE CIUDAD REAL                                                                     | Instituto de Salud Carlos III                                                                                          | A. Monzón; F. Casas; I. ILLESCAS FERNANDEZ-BERMEJO; I. Jiménez; I. Illescas; Iglesias-Caballero; M. Camarero; M. SOLEDAD; M. Sardonis; M.S.; P. Zaballos; S. Camarero; S. Cuesta; S. Iglesias-Caballero; S. Pozo; S. Varona; Sardonis; V. Vázquez-Morón                                                                                                                                                                                                                                                       |
| EPI_ISL_3260876                                                                                                                                                                                                                                                                                                                                                                                                                                                                                                                                                                                                                                                                                        | HOSPITAL GENERAL UNIVERSITARIO DE GUADALAJARA                                                                     | Instituto de Salud Carlos III                                                                                          | A. Monzón; ALEJANDRO; F. Casas; I. Jiménez; I.GONZALEZ PRAETORIUS; Iglesias-Caballero; M. Sardonis; P. Zaballos; S. Camarero; S. Cuesta; S. Pozo; S. Varona; V. Vázquez-Morón                                                                                                                                                                                                                                                                                                                                 |
| EPI_ISL_6591656                                                                                                                                                                                                                                                                                                                                                                                                                                                                                                                                                                                                                                                                                        | HOSPITAL GUAPILES                                                                                                 | Incienza, Instituto Costarricense de Investigación y Enseñanza en Nutrición y Salud                                    | Adriana Godínez; Claudio Soto-Garita; Estela Cordero; Francisco Duarte; Hebleen Porras; José Luis Vargas; Mariela Gutiérrez; Melany Calderón; Sofia Herrera & Cesar Cerdas Quesada                                                                                                                                                                                                                                                                                                                            |
| EPI_ISL_3260832, EPI_ISL_6963619                                                                                                                                                                                                                                                                                                                                                                                                                                                                                                                                                                                                                                                                       | HOSPITAL J.M. MORALES MESEGUER<br>HOSPITAL METROPOLITANO                                                          | Instituto de Salud Carlos III                                                                                          | A. Monzón; F. Casas; I. Jiménez; I.ANTEQUERA RODRIGUEZ; M. Sardonis; P. Zaballos; PEDRO; S. Cuesta; S. Iglesias-Caballero; S. Pozo; S. Varona; V. Camarero; Vázquez-Morón<br>Adriana Godínez; Claudio Soto-Garita; Estela Cordero; Francisco Duarte; Hebleen Porras; José Luis Vargas; Mariela Gutiérrez & Sofia Herrera; Melany Calderón                                                                                                                                                                     |
| EPI_ISL_4435526, EPI_ISL_3274350                                                                                                                                                                                                                                                                                                                                                                                                                                                                                                                                                                                                                                                                       | HOSPITAL PULAU PINANG<br>HOSPITAL SAN FRANCISCO DE ASIS                                                           | iPROMISE, UTM                                                                                                          | Ariza Adnan; Fadzilah Mohd Nor; Lim Wai Feng; Mohd Asif Mohd Sukri; Mohd Nur Fakhruzzaman Noorizhab; Mohd Zaki Salleh; Sazzli Shahlan Kassim; Siti Farah Alwani Mohd Naw; Siti Hamimah Sheikh Abdul Kadir; Teh Lay Kek; Wang Seok Mui                                                                                                                                                                                                                                                                         |
| EPI_ISL_6591525                                                                                                                                                                                                                                                                                                                                                                                                                                                                                                                                                                                                                                                                                        | HOSPITAL SAN VICENTE DE PAUL                                                                                      | Incienza, Instituto Costarricense de Investigación y Enseñanza en Nutrición y Salud                                    | Adriana Godínez; Claudio Soto-Garita; Estela Cordero; Francisco Duarte; Hebleen Porras; José Luis Vargas; Mariela Gutiérrez; Melany Calderón; Sofia Herrera & María Fernanda Sosa Jiménez                                                                                                                                                                                                                                                                                                                     |
| EPI_ISL_417007, EPI_ISL_418253                                                                                                                                                                                                                                                                                                                                                                                                                                                                                                                                                                                                                                                                         | HOSPITAL SANTA MARIA NAI<br>HOSPITAL TXAGORRITXU                                                                  | Instituto de Salud Carlos III                                                                                          | A. Monzón; I. García Costa, J.; Iglesias-Caballero; M. Camarero S. Pozo F. Casas I. Jiménez; M. Cuesta; M. González-Esguevillas; M. Molinero Calamita; M. Zaballos; P. Jiménez; S. Juliá; S. Varona                                                                                                                                                                                                                                                                                                           |
| EPI_ISL_3233324                                                                                                                                                                                                                                                                                                                                                                                                                                                                                                                                                                                                                                                                                        | HOSPITAL UNIVERSITARIO DE CEUTA                                                                                   | Instituto de Salud Carlos III                                                                                          | A. Monzón; F. Casas; I. Gomez-Gonzalez C.; I. Jiménez; Iglesias-Caballero; M. Camarero; M. Cuesta; M. González-Esguevillas; M. Molinero Calamita; M. Zaballos; P. Jiménez; S. Juliá; S. Pozo; S. Varona                                                                                                                                                                                                                                                                                                       |
| EPI_ISL_2100320, EPI_ISL_3221279                                                                                                                                                                                                                                                                                                                                                                                                                                                                                                                                                                                                                                                                       | HOSPITAL UNIVERSITARIO SON ESPASES                                                                                | HOSPITAL UNIVERSITARIO SON ESPASES                                                                                     | A. Monzón; F. Casas; I. Jiménez; I.Hijano, S.; Iglesias-Caballero; M. Sardonis; P. Zaballos; S. Camarero; S. Cuesta; S. Pozo; S. Varona; V. Vázquez-Morón                                                                                                                                                                                                                                                                                                                                                     |
| EPI_ISL_3230083,                                                                                                                                                                                                                                                                                                                                                                                                                                                                                                                                                                                                                                                                                       | HOSPITAL UNIVERSITARIO VIRGEN DE LA ARRIXACA                                                                      | Instituto de Salud Carlos III                                                                                          | Antonio Oliver; Carla López-Causapé; Dr. Antonio Oliver; Dr. Carla López-Causapé; Dr. Gabriel Cabot; Hospital Universitario Son Espases; Pablo Fraile-Ribot; SeqCovid; on behalf of Servicio de Microbiología                                                                                                                                                                                                                                                                                                 |
|                                                                                                                                                                                                                                                                                                                                                                                                                                                                                                                                                                                                                                                                                                        |                                                                                                                   | Instituto de Salud Carlos III                                                                                          | A. Monzón; F. Casas; I. Jiménez; I.MORENO PARRADO; Iglesias-Caballero; LAURA; M. Sardonis; P. Zaballos; S. Camarero; S. Cuesta; S. Iglesias-Caballero; S. Pozo; S. Varona; V. Camarero; V. Vázquez-Morón; Vázquez-Morón                                                                                                                                                                                                                                                                                       |

|                                                                                                                                                                                                                                                                                                                                                                                                                                                                                                                                                                                                                                                                                                                                                                                                                                                                                                                                                                                                                                                                                                                                                                                                                                                                                                                                                                                                                                                                                                                                                                                                                                                                                                                 |                                                                                           |                                                                                                                                                                                                                                                                                                                                                                                                                                                                                                                                                                                                                                                                                             |                                                                                                                                                                                                                                                                                                                                                                                                                                                                                                                                                                                                                                                                                                                                |
|-----------------------------------------------------------------------------------------------------------------------------------------------------------------------------------------------------------------------------------------------------------------------------------------------------------------------------------------------------------------------------------------------------------------------------------------------------------------------------------------------------------------------------------------------------------------------------------------------------------------------------------------------------------------------------------------------------------------------------------------------------------------------------------------------------------------------------------------------------------------------------------------------------------------------------------------------------------------------------------------------------------------------------------------------------------------------------------------------------------------------------------------------------------------------------------------------------------------------------------------------------------------------------------------------------------------------------------------------------------------------------------------------------------------------------------------------------------------------------------------------------------------------------------------------------------------------------------------------------------------------------------------------------------------------------------------------------------------|-------------------------------------------------------------------------------------------|---------------------------------------------------------------------------------------------------------------------------------------------------------------------------------------------------------------------------------------------------------------------------------------------------------------------------------------------------------------------------------------------------------------------------------------------------------------------------------------------------------------------------------------------------------------------------------------------------------------------------------------------------------------------------------------------|--------------------------------------------------------------------------------------------------------------------------------------------------------------------------------------------------------------------------------------------------------------------------------------------------------------------------------------------------------------------------------------------------------------------------------------------------------------------------------------------------------------------------------------------------------------------------------------------------------------------------------------------------------------------------------------------------------------------------------|
| EPI_ISL_3260881<br>EPI_ISL_418243,<br>EPI_ISL_418244                                                                                                                                                                                                                                                                                                                                                                                                                                                                                                                                                                                                                                                                                                                                                                                                                                                                                                                                                                                                                                                                                                                                                                                                                                                                                                                                                                                                                                                                                                                                                                                                                                                            | HOSPITAL UNIVERSITARIO VIRGEN DE LAS NIEVES                                               | Instituto de Salud Carlos III                                                                                                                                                                                                                                                                                                                                                                                                                                                                                                                                                                                                                                                               | A. Monzón; F. Casas; I. Jiménez; I. Sanbonmatsu S.; Iglesias-Caballero; M. Camarero; M. Cuesta; M. González-Esguevillas; M. Molinero Calamita; M. Zaballos; P. Jiménez; S. Juliá; S. Pozo; S. Varona                                                                                                                                                                                                                                                                                                                                                                                                                                                                                                                           |
| EPI_ISL_3260814,<br>EPI_ISL_3260817                                                                                                                                                                                                                                                                                                                                                                                                                                                                                                                                                                                                                                                                                                                                                                                                                                                                                                                                                                                                                                                                                                                                                                                                                                                                                                                                                                                                                                                                                                                                                                                                                                                                             | HOSPITAL VIRGEN DE LA SALUD DE TOLEDO                                                     | Instituto de Salud Carlos III                                                                                                                                                                                                                                                                                                                                                                                                                                                                                                                                                                                                                                                               | A. Monzón; EVA; F. Casas; I. Jiménez; I.HEREDERO GALVEZ; M. Sandonis; P. Zaballos; S. Cuesta; S. Iglesias-Caballero; S. Pozo; S. Varona; V. Camarero; Vázquez-Morón                                                                                                                                                                                                                                                                                                                                                                                                                                                                                                                                                            |
| EPI_ISL_6131988                                                                                                                                                                                                                                                                                                                                                                                                                                                                                                                                                                                                                                                                                                                                                                                                                                                                                                                                                                                                                                                                                                                                                                                                                                                                                                                                                                                                                                                                                                                                                                                                                                                                                                 | HRPB                                                                                      | Department of Medical Microbiology, Faculty of Medicine, University of Malaya; University of Malaya Medical Centre                                                                                                                                                                                                                                                                                                                                                                                                                                                                                                                                                                          | I-Ching SAM; Jolene Yin Ling FU; Omar Khalilur Rahman; Yoke Fun Chan                                                                                                                                                                                                                                                                                                                                                                                                                                                                                                                                                                                                                                                           |
| EPI_ISL_7087286                                                                                                                                                                                                                                                                                                                                                                                                                                                                                                                                                                                                                                                                                                                                                                                                                                                                                                                                                                                                                                                                                                                                                                                                                                                                                                                                                                                                                                                                                                                                                                                                                                                                                                 | HRPB, Ipoh                                                                                | Department of Medical Microbiology, Faculty of Medicine, University of Malaya; University of Malaya Medical Centre                                                                                                                                                                                                                                                                                                                                                                                                                                                                                                                                                                          | I-Ching SAM; Jolene Yin Ling FU; Omar Khalilur Rahman; Yoke Fun Chan                                                                                                                                                                                                                                                                                                                                                                                                                                                                                                                                                                                                                                                           |
| EPI_ISL_1116975                                                                                                                                                                                                                                                                                                                                                                                                                                                                                                                                                                                                                                                                                                                                                                                                                                                                                                                                                                                                                                                                                                                                                                                                                                                                                                                                                                                                                                                                                                                                                                                                                                                                                                 | HSE Ilha Terceira - Angra do Heroismo                                                     | Instituto Nacional de Saude (INSA) and Instituto Gulbenkian de Ciencia (IGC)                                                                                                                                                                                                                                                                                                                                                                                                                                                                                                                                                                                                                | Borges et al                                                                                                                                                                                                                                                                                                                                                                                                                                                                                                                                                                                                                                                                                                                   |
| EPI_ISL_2193677, EPI_ISL_3235315, EPI_ISL_3235329, EPI_ISL_3235332, EPI_ISL_3235334, EPI_ISL_3235348, EPI_ISL_3235350, EPI_ISL_3235358                                                                                                                                                                                                                                                                                                                                                                                                                                                                                                                                                                                                                                                                                                                                                                                                                                                                                                                                                                                                                                                                                                                                                                                                                                                                                                                                                                                                                                                                                                                                                                          | see above                                                                                 | Hackensack Medical Center                                                                                                                                                                                                                                                                                                                                                                                                                                                                                                                                                                                                                                                                   | Amy Baldwin; Andre Corvelo; Barry Kreiswirth; David Perlin; Dayna M. Oschwald; Jose Mediavilla; Kaelea Composto; Kar Chow; Liang Chen; Marcus Cunningham; Michael Zody; Samantha Fennessey; Tom Maniatis                                                                                                                                                                                                                                                                                                                                                                                                                                                                                                                       |
| EPI_ISL_418503                                                                                                                                                                                                                                                                                                                                                                                                                                                                                                                                                                                                                                                                                                                                                                                                                                                                                                                                                                                                                                                                                                                                                                                                                                                                                                                                                                                                                                                                                                                                                                                                                                                                                                  | Hangzhou Center for Disease Control and Prevention                                        | Inspection Center of Hangzhou Center for Disease Control and Prevention                                                                                                                                                                                                                                                                                                                                                                                                                                                                                                                                                                                                                     | Li jun; Pan jingcao; Wang haoqiu; Yu hua; Yu xinfeng                                                                                                                                                                                                                                                                                                                                                                                                                                                                                                                                                                                                                                                                           |
| EPI_ISL_421225, EPI_ISL_421228, EPI_ISL_421230, EPI_ISL_421234, EPI_ISL_421235, EPI_ISL_482575, EPI_ISL_482577                                                                                                                                                                                                                                                                                                                                                                                                                                                                                                                                                                                                                                                                                                                                                                                                                                                                                                                                                                                                                                                                                                                                                                                                                                                                                                                                                                                                                                                                                                                                                                                                  | see above                                                                                 | Hangzhou Center for Diseases Control and Prevention                                                                                                                                                                                                                                                                                                                                                                                                                                                                                                                                                                                                                                         | Haoqiu Wang; Hua Yu; Jun Li; Junfang Chen; Lingfeng Mao; Shuchang Chen; Xin Qian; Xinfen Yu; Xuchu Wang; Zhou Sun                                                                                                                                                                                                                                                                                                                                                                                                                                                                                                                                                                                                              |
| EPI_ISL_1268723                                                                                                                                                                                                                                                                                                                                                                                                                                                                                                                                                                                                                                                                                                                                                                                                                                                                                                                                                                                                                                                                                                                                                                                                                                                                                                                                                                                                                                                                                                                                                                                                                                                                                                 | Hannover Medical School, Institute of Virology                                            | Hannover Medical School, Institute of Virology                                                                                                                                                                                                                                                                                                                                                                                                                                                                                                                                                                                                                                              | Lars Steinbrück                                                                                                                                                                                                                                                                                                                                                                                                                                                                                                                                                                                                                                                                                                                |
| EPI_ISL_413025<br>EPI_ISL_413487                                                                                                                                                                                                                                                                                                                                                                                                                                                                                                                                                                                                                                                                                                                                                                                                                                                                                                                                                                                                                                                                                                                                                                                                                                                                                                                                                                                                                                                                                                                                                                                                                                                                                | Harborview Medical Center<br>Harborview Medical Center                                    | UW Virology Lab<br>University of Washington Virology Lab                                                                                                                                                                                                                                                                                                                                                                                                                                                                                                                                                                                                                                    | Alexander Greninger; Arun Nalla; Hong Xie; Keith Jerome; Pavitra Roychoudhury<br>Alexander Greninger; Arun Nalla; Hong Xie; Keith Jerome; Pavitra Roychoudhury                                                                                                                                                                                                                                                                                                                                                                                                                                                                                                                                                                 |
| EPI_ISL_3229955<br>EPI_ISL_3229959                                                                                                                                                                                                                                                                                                                                                                                                                                                                                                                                                                                                                                                                                                                                                                                                                                                                                                                                                                                                                                                                                                                                                                                                                                                                                                                                                                                                                                                                                                                                                                                                                                                                              | Haukeland University Hospital, Dept. of Microbiology                                      | Norwegian Institute of Public Health, Department of Virology                                                                                                                                                                                                                                                                                                                                                                                                                                                                                                                                                                                                                                | Atiya R Ali; Debech Nadia; Engbretsen Serina Beate; Garcia Lorente Ignacio; Hilde Elshaug; Hilde Vollan; Jon Bråte; Kamilla Heddeland Instefjord; Karoline Bragstad; Kathrine Stene-Johansen; Line Victoria Moen; Marie Paulsen Madsen; Olav Hungnes;                                                                                                                                                                                                                                                                                                                                                                                                                                                                          |
| EPI_ISL_2938110                                                                                                                                                                                                                                                                                                                                                                                                                                                                                                                                                                                                                                                                                                                                                                                                                                                                                                                                                                                                                                                                                                                                                                                                                                                                                                                                                                                                                                                                                                                                                                                                                                                                                                 | Health Center Novi Grad Sarajevo                                                          | Clinical Center, University of Sarajevo; Unit for Clinical Microbiology                                                                                                                                                                                                                                                                                                                                                                                                                                                                                                                                                                                                                     | Amela Dedečić-Ljubović; Edina Zahirović; Irma Salimović-Bešić; Sandra Vegar-Zubović; Sebija Izetbegović                                                                                                                                                                                                                                                                                                                                                                                                                                                                                                                                                                                                                        |
| EPI_ISL_1831319, EPI_ISL_2006574, EPI_ISL_2006626, EPI_ISL_3202551, EPI_ISL_3225115, EPI_ISL_3225151, EPI_ISL_3284964, EPI_ISL_3287563                                                                                                                                                                                                                                                                                                                                                                                                                                                                                                                                                                                                                                                                                                                                                                                                                                                                                                                                                                                                                                                                                                                                                                                                                                                                                                                                                                                                                                                                                                                                                                          | see above                                                                                 | Health Services Laboratories                                                                                                                                                                                                                                                                                                                                                                                                                                                                                                                                                                                                                                                                | Cordelia Langford; David K. Jackson; Dominic Kwiatkowski; Ewan Harrison; Health Services Laboratories and Alex Alderton; Ian Johnston; Jeffrey Barrett; John Sillitoe on behalf of the Wellcome Sanger Institute COVID-19 Surveillance Team; Roberto Amato; Sonia Goncalves                                                                                                                                                                                                                                                                                                                                                                                                                                                    |
| EPI_ISL_3207530<br>EPI_ISL_6826747                                                                                                                                                                                                                                                                                                                                                                                                                                                                                                                                                                                                                                                                                                                                                                                                                                                                                                                                                                                                                                                                                                                                                                                                                                                                                                                                                                                                                                                                                                                                                                                                                                                                              | Heideveld Emergency Centre<br>Helix Laboratorium                                          | NHLS/UCT<br>National Institute of Health Research and Development                                                                                                                                                                                                                                                                                                                                                                                                                                                                                                                                                                                                                           | Arash Iranzadeh; Bruna Galvao; Carolyn Williamson; Deelan Doolabh; Diana Hardie; Gert Marais; Innocent Mudau; Lynn Tyers; Marvin Hsiao; Rageema Joseph; Stephen Korsman<br>Arie Ardiansyah Nugraha; Fajar Nur Sulistyohadi; Hana Aparsi Pawestri; Hartanti Dian Ikawati; Kartika Dewi Puspa; Krisna Pangesti; Nelly Puspandari; Subangkit; Vivi Setiawaty                                                                                                                                                                                                                                                                                                                                                                      |
| EPI_ISL_1267815, EPI_ISL_1268563, EPI_ISL_1269240, EPI_ISL_1270322, EPI_ISL_1270461, EPI_ISL_1270581, EPI_ISL_1298210, EPI_ISL_1337153, EPI_ISL_1337333, EPI_ISL_1337417, EPI_ISL_1338017, EPI_ISL_1340145, EPI_ISL_1340329, EPI_ISL_1421491, EPI_ISL_1421500, EPI_ISL_1421694, EPI_ISL_1480137, EPI_ISL_1480320, EPI_ISL_1480457, EPI_ISL_1512016, EPI_ISL_1512057, EPI_ISL_1512094, EPI_ISL_1512533, EPI_ISL_1553443, EPI_ISL_1553714, EPI_ISL_1553756, EPI_ISL_1553931, EPI_ISL_1554028, EPI_ISL_1554302, EPI_ISL_1554366, EPI_ISL_1554764, EPI_ISL_1554798, EPI_ISL_1557566, EPI_ISL_1575977, EPI_ISL_1576043, EPI_ISL_1576130, EPI_ISL_1576216, EPI_ISL_1576486, EPI_ISL_1576678, EPI_ISL_1581032, EPI_ISL_1581259, EPI_ISL_1592507, EPI_ISL_1592512, EPI_ISL_1592794, EPI_ISL_1592935, EPI_ISL_1593000, EPI_ISL_1678977, EPI_ISL_1679410, EPI_ISL_1679573, EPI_ISL_1679982, EPI_ISL_1690326, EPI_ISL_1690917, EPI_ISL_1690962, EPI_ISL_1734631, EPI_ISL_1734862, EPI_ISL_1735249, EPI_ISL_1735312, EPI_ISL_1735442, EPI_ISL_1796125, EPI_ISL_1796814, EPI_ISL_1796825, EPI_ISL_1796837, EPI_ISL_1796914, EPI_ISL_1797000, EPI_ISL_1797136, EPI_ISL_1797290, EPI_ISL_1803545, EPI_ISL_1803625, EPI_ISL_1803628, EPI_ISL_1804149, EPI_ISL_1804414, EPI_ISL_1804429, EPI_ISL_1804545, EPI_ISL_1804678, EPI_ISL_1804762, EPI_ISL_1804687, EPI_ISL_1906927, EPI_ISL_1907402, EPI_ISL_1907521, EPI_ISL_1907987, EPI_ISL_1924049, EPI_ISL_1991374, EPI_ISL_1991431, EPI_ISL_2009699, EPI_ISL_2009779, EPI_ISL_2010307, EPI_ISL_2010601, EPI_ISL_2097537, EPI_ISL_2144255, EPI_ISL_2144476, EPI_ISL_2144685, EPI_ISL_2145047, EPI_ISL_2145571, EPI_ISL_2159473, EPI_ISL_2159841, EPI_ISL_2160025, EPI_ISL_2160704 | Centers for Disease Control and Prevention Division of Viral Diseases, Pathogen Discovery | Adrian Paskey; Alexandre Bolze; Ary Ascencio; Ben L. Rambo-Martin; Benjamin Rambo-Martin; Brad Sickler; Charlotte Rivera-Garcia; Christine Tran; Christopher Gulvick; Clinton R. Paden; Dakota Howard; Darlene Wagner; David Becker; Dhvani Batra; Duncan MacCannell; Efen Sandoval; Eileen de Feo; Elizabeth Cirulli; Eric Allen; Geraint Levan; James Lu; Jan Antico; Jason Nguyen; Jimmy Ramirez; Magnus Isaksson; Marc Laurent; Matthew Scherer; Matthew Tolentino; Nicole L. Washington; Peter W. Cook; Phil Febbo; Ryan Cho; Scott Sammons; Shannon Wickline; Shatavia Morrison; Sherry Wang; Simon White; Summer Galloway; Suxiang Tong; Tyler Cassens; William Lee; Yvette Unarumhi |                                                                                                                                                                                                                                                                                                                                                                                                                                                                                                                                                                                                                                                                                                                                |
| EPI_ISL_802672                                                                                                                                                                                                                                                                                                                                                                                                                                                                                                                                                                                                                                                                                                                                                                                                                                                                                                                                                                                                                                                                                                                                                                                                                                                                                                                                                                                                                                                                                                                                                                                                                                                                                                  | Helix/Illumina                                                                            | Genomics and Discovery, Respiratory Viruses Branch, Division of Viral Diseases, Centers for Disease Control and Prevention                                                                                                                                                                                                                                                                                                                                                                                                                                                                                                                                                                  | Alexandre Bolze; Ary Ascencio; Ben L. Rambo-Martin Eileen de Feo; Brad Sickler; Charlotte Rivera-Garcia; Christine Tran; Clinton R. Paden; David Becker; Dhvani Batra; Duncan MacCannell; Efen Sandoval; Elizabeth Cirulli; Eric Allen; Geraint Levan; James Lu; Jan Antico; Jason Nguyen; Jimmy Ramirez; Jingtao Liu; Kelly Schiabor Barrett; Kim Gietzen; Magnus Isaksson; Marc Laurent; Matthew Tolentino; Nicole L. Washington; Peter W. Cook; Phil Febbo; Ryan Cho; Shannon Wickline; Sherry Wang; Simon White; Summer Galloway; Suxiang Tong; Tyler Cassens; William Lee                                                                                                                                                 |
| EPI_ISL_699750, EPI_ISL_699844, EPI_ISL_699968, EPI_ISL_700050, EPI_ISL_700102, EPI_ISL_700269, EPI_ISL_700316, EPI_ISL_2530369, EPI_ISL_2530374                                                                                                                                                                                                                                                                                                                                                                                                                                                                                                                                                                                                                                                                                                                                                                                                                                                                                                                                                                                                                                                                                                                                                                                                                                                                                                                                                                                                                                                                                                                                                                | see above                                                                                 | Hematopathology Laboratory, ACTREC, TMC                                                                                                                                                                                                                                                                                                                                                                                                                                                                                                                                                                                                                                                     | ACTREC; Hematopathology Laboratory                                                                                                                                                                                                                                                                                                                                                                                                                                                                                                                                                                                                                                                                                             |
| EPI_ISL_2155462                                                                                                                                                                                                                                                                                                                                                                                                                                                                                                                                                                                                                                                                                                                                                                                                                                                                                                                                                                                                                                                                                                                                                                                                                                                                                                                                                                                                                                                                                                                                                                                                                                                                                                 | Hi-Precision Diagnostic Center (QC)                                                       | Philippine Genome Center                                                                                                                                                                                                                                                                                                                                                                                                                                                                                                                                                                                                                                                                    | Alethea R. de Guzman; Anna Ong-Lim; Arianne A. Zamora; Asia Louisa U. Chong; Benedict A. Maralit; Candice Francheska B. Tambaon; Carlo M. Lapid; Celia Carlos; Devon Ray Pacial; Edsel Maurice Salvaña; El King D. Morado; Eva Maria Cutiongco-de la Paz; Francis A. Tablizo; Irish Coleen A. Asin; Jaime C. Montoya; Jan Michael C. Yap; Jo-Hannah S. Llamas; John Q. Antico; Joshua Gregor A. Dizon; Juan Antonio R. Magalang; Karol Sophia Agape R. Padilla; Kenneth M. Kim; Kris P. Punayari; Marc Edsel C. Ayes; Marc Jerrone R. Castro; Maria Rosario Singh-Vergeire and Cynthia P. Saloma; Maria Sofia L. Yangzon; Marissa Alejandria; Razel Nikka M. Hao; Rianna Patricia S. Cruz; Sheila Mae M. Araiza                |
| EPI_ISL_3183433, EPI_ISL_3183451, EPI_ISL_3183454, EPI_ISL_3183457, EPI_ISL_3183471, EPI_ISL_3183475, EPI_ISL_3183476, EPI_ISL_3183481, EPI_ISL_3183483, EPI_ISL_3183486, EPI_ISL_3183487, EPI_ISL_3183488, EPI_ISL_3183492, EPI_ISL_3183505, EPI_ISL_3183506, EPI_ISL_3183511                                                                                                                                                                                                                                                                                                                                                                                                                                                                                                                                                                                                                                                                                                                                                                                                                                                                                                                                                                                                                                                                                                                                                                                                                                                                                                                                                                                                                                  | see above                                                                                 | Hiroshima Prefectural Technology Research Institute, Public Health and Environment Center                                                                                                                                                                                                                                                                                                                                                                                                                                                                                                                                                                                                   | Akie Nakashima; Ayano Ito; Hiroko Akita; Kanako Masuda; Kentaro Itokawa; Makoto Kuroda; Mana Suel; Masanori Hashino; Naoki Shigemoto; Rina Tanaka; Shinichi Takao; Syuhei Ikeda; Takahiro Hiratsuka; Tsuyoshi Sekizuka; Yukie Shimazu                                                                                                                                                                                                                                                                                                                                                                                                                                                                                          |
| EPI_ISL_3185063, EPI_ISL_3186176, EPI_ISL_3186280, EPI_ISL_3186657, EPI_ISL_3186687, EPI_ISL_3186784, EPI_ISL_3186829, EPI_ISL_3187033, EPI_ISL_3281116                                                                                                                                                                                                                                                                                                                                                                                                                                                                                                                                                                                                                                                                                                                                                                                                                                                                                                                                                                                                                                                                                                                                                                                                                                                                                                                                                                                                                                                                                                                                                         | see above                                                                                 | Histopath                                                                                                                                                                                                                                                                                                                                                                                                                                                                                                                                                                                                                                                                                   | Arnott A.; CIDM-PH et al.; Draper J.; Gall M.; Martinez E.; Rockett R.; Sintchenko V.; on behalf of ICPMR                                                                                                                                                                                                                                                                                                                                                                                                                                                                                                                                                                                                                      |
| EPI_ISL_3199182, EPI_ISL_3199197, EPI_ISL_3199220, EPI_ISL_3199242, EPI_ISL_3199262, EPI_ISL_3199275, EPI_ISL_3199734                                                                                                                                                                                                                                                                                                                                                                                                                                                                                                                                                                                                                                                                                                                                                                                                                                                                                                                                                                                                                                                                                                                                                                                                                                                                                                                                                                                                                                                                                                                                                                                           | see above                                                                                 | Hokkaido Institute of Public Health                                                                                                                                                                                                                                                                                                                                                                                                                                                                                                                                                                                                                                                         | Kazuhiro Okubo; Kentaro Itokawa; Makoto Kuroda; Masanori Hashino; Rina Tanaka; Tsuyoshi Sekizuka; Yuta Ohno                                                                                                                                                                                                                                                                                                                                                                                                                                                                                                                                                                                                                    |
| EPI_ISL_412028                                                                                                                                                                                                                                                                                                                                                                                                                                                                                                                                                                                                                                                                                                                                                                                                                                                                                                                                                                                                                                                                                                                                                                                                                                                                                                                                                                                                                                                                                                                                                                                                                                                                                                  | Hong Kong Department of Health                                                            | School of Public Health, The University of Hon g Kong                                                                                                                                                                                                                                                                                                                                                                                                                                                                                                                                                                                                                                       | Daniel K.W. Chu; Dominic N.C. Tsang; Leo L.M. Poon; Malik Peiris                                                                                                                                                                                                                                                                                                                                                                                                                                                                                                                                                                                                                                                               |
| EPI_ISL_414517,<br>EPI_ISL_414527                                                                                                                                                                                                                                                                                                                                                                                                                                                                                                                                                                                                                                                                                                                                                                                                                                                                                                                                                                                                                                                                                                                                                                                                                                                                                                                                                                                                                                                                                                                                                                                                                                                                               | Hong Kong Department of Health                                                            | School of Public Health, The University of Hong Kong                                                                                                                                                                                                                                                                                                                                                                                                                                                                                                                                                                                                                                        | Daniel K.W. Chu; Dominic N.C. Tsang; Leo L.M. Poon; Malik Peiris                                                                                                                                                                                                                                                                                                                                                                                                                                                                                                                                                                                                                                                               |
| EPI_ISL_412029                                                                                                                                                                                                                                                                                                                                                                                                                                                                                                                                                                                                                                                                                                                                                                                                                                                                                                                                                                                                                                                                                                                                                                                                                                                                                                                                                                                                                                                                                                                                                                                                                                                                                                  | Hong Kong Department of Health                                                            | The University of Hong Kong                                                                                                                                                                                                                                                                                                                                                                                                                                                                                                                                                                                                                                                                 | Daniel K.W. Chu; Dominic N.C. Tsang; Leo L.M. Poon; Malik Peiris                                                                                                                                                                                                                                                                                                                                                                                                                                                                                                                                                                                                                                                               |
| EPI_ISL_872214, EPI_ISL_872296, EPI_ISL_872342, EPI_ISL_883974, EPI_ISL_953944, EPI_ISL_954047, EPI_ISL_1001354, EPI_ISL_1001357, EPI_ISL_1060355, EPI_ISL_1060429, EPI_ISL_1096297, EPI_ISL_1110395, EPI_ISL_1110418, EPI_ISL_1110444, EPI_ISL_1110996, EPI_ISL_1110999, EPI_ISL_1111012, EPI_ISL_1111028, EPI_ISL_1111034, EPI_ISL_11167002, EPI_ISL_1167004, EPI_ISL_1219927, EPI_ISL_1233247, EPI_ISL_1259285, EPI_ISL_1262907, EPI_ISL_12699418, EPI_ISL_1268505, EPI_ISL_1268625, EPI_ISL_1268630                                                                                                                                                                                                                                                                                                                                                                                                                                                                                                                                                                                                                                                                                                                                                                                                                                                                                                                                                                                                                                                                                                                                                                                                         | see above                                                                                 | Hopital                                                                                                                                                                                                                                                                                                                                                                                                                                                                                                                                                                                                                                                                                     | National Reference Center for Viruses of Respiratory Infections, Institut Pasteur, Paris<br>Alexandra DUCANCELLE; Angela Brisebarre; Anne CADY; Bernardi Franck; Cady Anne; Camille Capel; Centre Hospitalier De Manosque; Christophe Malabat; Combe Patrice; Corinne Maufrais; Ducancelle Alexandra; Ducancelle Alexandra; Etienne Simon-Lorière; Fourgeaud Jacques; Frédéric Lemoine; Griscelli Franck; Gros Isabelle; Guignon Aurélie; Guinard Jérôme; Guinoseau Thibault; Isabelle WORCEL; Julien Fumey; Louise Lefrançois; Mama Imene Fodi Pacha; Marque Juliet StéPhanie; Maud Vanpenne; Méline Bizard; Pïlorge LÉA; Serazin V; Slim El Khiair; Sylvie Behillil; Sylvie Van der Werf; Sylvie van der Werf; Vincent Enouf |
| EPI_ISL_416501                                                                                                                                                                                                                                                                                                                                                                                                                                                                                                                                                                                                                                                                                                                                                                                                                                                                                                                                                                                                                                                                                                                                                                                                                                                                                                                                                                                                                                                                                                                                                                                                                                                                                                  | Hopital franco britannique - Service des Urgences                                         | National Reference Center for Viruses of Respiratory Infections, Institut Pasteur, Paris                                                                                                                                                                                                                                                                                                                                                                                                                                                                                                                                                                                                    | Angela Brisebarre; Etienne Simon-Lorière; Flora Donati; Marion Barbet; Maud Vanpenne; Méline Bizard; Sylvie Behillil; Sylvie van der Werf; Vincent Enouf                                                                                                                                                                                                                                                                                                                                                                                                                                                                                                                                                                       |
| EPI_ISL_560599, EPI_ISL_718245, EPI_ISL_1381110, EPI_ISL_1381149, EPI_ISL_1416828, EPI_ISL_1416939, EPI_ISL_1417001, EPI_ISL_1417006, EPI_ISL_1443870, EPI_ISL_1516915, EPI_ISL_1516933, EPI_ISL_1516959, EPI_ISL_1517057, EPI_ISL_1517476, EPI_ISL_1528196, EPI_ISL_1528205, EPI_ISL_1528240, EPI_ISL_1554913, EPI_ISL_1554930, EPI_ISL_1582670, EPI_ISL_1582726, EPI_ISL_1583113, EPI_ISL_1621522, EPI_ISL_1621722, EPI_ISL_1700665, EPI_ISL_1708625, EPI_ISL_1788905, EPI_ISL_1789053, EPI_ISL_2030081, EPI_ISL_2030140, EPI_ISL_2030147, EPI_ISL_2178473, EPI_ISL_2178502, EPI_ISL_2188455, EPI_ISL_2259090, EPI_ISL_2279618, EPI_ISL_2293516, EPI_ISL_2462930, EPI_ISL_2532295, EPI_ISL_2532360, EPI_ISL_2627959, EPI_ISL_2757673, EPI_ISL_2790845, EPI_ISL_2835903, EPI_ISL_2877463, EPI_ISL_3031923, EPI_ISL_3154762, EPI_ISL_3155063, EPI_ISL_3155071, EPI_ISL_3219538, EPI_ISL_3245828, EPI_ISL_3245847, EPI_ISL_3245962, EPI_ISL_3292677, EPI_ISL_3506686, EPI_ISL_3690211, EPI_ISL_3804085, EPI_ISL_3804319, EPI_ISL_3999856, EPI_ISL_4171417, EPI_ISL_4236971, EPI_ISL_4461407, EPI_ISL_4461751, EPI_ISL_4503915, EPI_ISL_4600684, EPI_ISL_5054070, EPI_ISL_5409900, EPI_ISL_5717223, EPI_ISL_5945524, EPI_ISL_5945724, EPI_ISL_5945873, EPI_ISL_6315736, EPI_ISL_6471388, EPI_ISL_6699491, EPI_ISL_6868910, EPI_ISL_7150970                                                                                                                                                                                                                                                                                                                                                                        |                                                                                           |                                                                                                                                                                                                                                                                                                                                                                                                                                                                                                                                                                                                                                                                                             |                                                                                                                                                                                                                                                                                                                                                                                                                                                                                                                                                                                                                                                                                                                                |



|                                                                                                                                                                                                           |                                                                       |                                                                                                                                                    |                                                                                                                                                                                                                                                                                                                                                                                                                                                                                                                                                                                                                                                                                                                                                                                                                                                                                                                                                                                                                                                                                                                                                                                                                                                                                                                                                                                                                                                                                                                                                                                                                                              |
|-----------------------------------------------------------------------------------------------------------------------------------------------------------------------------------------------------------|-----------------------------------------------------------------------|----------------------------------------------------------------------------------------------------------------------------------------------------|----------------------------------------------------------------------------------------------------------------------------------------------------------------------------------------------------------------------------------------------------------------------------------------------------------------------------------------------------------------------------------------------------------------------------------------------------------------------------------------------------------------------------------------------------------------------------------------------------------------------------------------------------------------------------------------------------------------------------------------------------------------------------------------------------------------------------------------------------------------------------------------------------------------------------------------------------------------------------------------------------------------------------------------------------------------------------------------------------------------------------------------------------------------------------------------------------------------------------------------------------------------------------------------------------------------------------------------------------------------------------------------------------------------------------------------------------------------------------------------------------------------------------------------------------------------------------------------------------------------------------------------------|
| see above                                                                                                                                                                                                 | Hospital                                                              | National Reference Center for Viruses of Respiratory Infections, Institut Pasteur, Paris                                                           | Adeline Baron; Alexandra Ducancelle; Angela Brisebarre; Anne Cady; Anne Vachec; Antoine Talarmin; Beate Heym; Benvenista; Camille Capel; Catherine FranCois; Corinne Maufrais; CéCile Farrugia; CéLine Bressollette; CéLine Ramanantsoa; Damien Mornic; Delphine Desbois; Dominique Descamps; Emmanuelle Permal; Eric Farfour; Etienne Simon-Lorière; Fabiana Gambauro; François-Charles Javague; Frédéric Lemoine; Gastil Nabil; Gisèle Lagathu; Guillaume Aubin (G); Guinard Jérôme; HERRMANN Cécile; Hecquet Denise; Hub Bioinformatique et Biostatistique; Hub de Bioinformatique et Statistique; Hub de bioinformatique et Biostatistique; Jean Baptiste Bour; Julien Fumey; Jérôme Guinard; Jérôme Durivault; L. Courdavault; Laura Djamdjian; Laurence Louvet; Louise Lefrançois; L&A Pilorge; Marianne Burgard; Marion Barbet; Maud Vanpeene; Méline Bizard; Nabil Gastil; Odile Morvan; Odile Petsaris; Olivia Raulin; Olivier Chappay; Pascale Martres; Patricia Barbut; Pierre Alain Billy; Pierre Lechat; Raphael Guiheneuf; Sandrine Castelain; Serazin Valérie; Slim El Khiairi; Slim El Khiairi; Sophie Mignard; Stéphanie Marque Juillet; Sylvaine Bastian; Sylvie Behillil; Sylvie Van der Werf; Sylvie van der Werf; Thibault Guisoiseau; Valérie Serazin; Vincent Enouf; Zehaira Bensedick                                                                                                                                                                                                                                                                                                                                |
| EPI_ISL_450726                                                                                                                                                                                            | Hospital AZ Rivierenland                                              | Institute of Tropical Medicine                                                                                                                     | Colin Anthony; Philippe Selhorst                                                                                                                                                                                                                                                                                                                                                                                                                                                                                                                                                                                                                                                                                                                                                                                                                                                                                                                                                                                                                                                                                                                                                                                                                                                                                                                                                                                                                                                                                                                                                                                                             |
| EPI_ISL_7260114                                                                                                                                                                                           | Hospital Ampang                                                       | Malaysia Genome Institute                                                                                                                          | Azrin Ahmad; Enizza Kasim; Irni Suhayu Sapian; Mohd Faizal Abu Bakar; Mohd Ghows Mohd Azzam.; Mohd Noor Mat Isa; Nor Azfa Johari; Nurhezreen Md Iqbal; Shamsidar Sopie; Siti Noraini Othman; Yusuf Muhammad Noor                                                                                                                                                                                                                                                                                                                                                                                                                                                                                                                                                                                                                                                                                                                                                                                                                                                                                                                                                                                                                                                                                                                                                                                                                                                                                                                                                                                                                             |
| EPI_ISL_5022682                                                                                                                                                                                           | Hospital Canselor Tuanku Muhriz (HCTM)                                | UKM Medical Molecular Biology Institute (UMBI)                                                                                                     | Mira Farzana binti Mohamad Mokhtar                                                                                                                                                                                                                                                                                                                                                                                                                                                                                                                                                                                                                                                                                                                                                                                                                                                                                                                                                                                                                                                                                                                                                                                                                                                                                                                                                                                                                                                                                                                                                                                                           |
| EPI_ISL_6825264                                                                                                                                                                                           | Hospital Canselor Tuanku Muhriz UKM                                   | Malaysia Genome Institute                                                                                                                          | Abdul Hamydy A Hamid; Ainihayati Noordin; Anita Sulong; Azrin Ahmad; Badrul AH Yusoff; Enizza Kasim; Haslina Mahbob; Irni Suhayu Sapian; Kon Ken Wong; Mohd Faizal Abu Bakar; Mohd Noor Mat Isa; Muttaqillah Najihan A Samat; Najma Kori; Noor Hamiza Ghulam; Nor Maslini Ismail; Nordiana Ismail; Nur Sahairah Awang; Nurhezreen Md Iqbal; Petrick Pearsamy; Shamsidar Sopie; Siti Noraini Othman; Siti Norlia Othman; Umi Kalsom Ali; Wan NH Wan Ghazali; Yusuf Muhammad Noor; Zetti Zainol Rashid                                                                                                                                                                                                                                                                                                                                                                                                                                                                                                                                                                                                                                                                                                                                                                                                                                                                                                                                                                                                                                                                                                                                         |
| EPI_ISL_1523060, EPI_ISL_1917242                                                                                                                                                                          | Hospital Center Emile Mayrisch                                        | Laboratoire national de sante, Microbiology, Microbial Genomics Platform                                                                           | Anke Wienecke-Baldacchio; Catherine Ragimbeau; Cynthia Oxacelay; Fatu Djabi; Jessica Tapp; Lise Pignon; Raoul Salmon; Tamir Abdelrahman                                                                                                                                                                                                                                                                                                                                                                                                                                                                                                                                                                                                                                                                                                                                                                                                                                                                                                                                                                                                                                                                                                                                                                                                                                                                                                                                                                                                                                                                                                      |
| EPI_ISL_862593                                                                                                                                                                                            | Hospital Comarcal de Melilla                                          | Instituto de Salud Carlos III                                                                                                                      | A. Monzón; F. Casas; I. Jiménez; I. López, J.; Iglesias-Caballero; M. Camarero; M. Cuesta; M. González-Esguevillas; M. Pozo; M. Zaballos; P. Jiménez; S. Juliá; S. Molinero Calamita; S. Varona                                                                                                                                                                                                                                                                                                                                                                                                                                                                                                                                                                                                                                                                                                                                                                                                                                                                                                                                                                                                                                                                                                                                                                                                                                                                                                                                                                                                                                              |
| EPI_ISL_4510317, EPI_ISL_5094644                                                                                                                                                                          | Hospital Dr. Hernán Henríquez Aravena                                 | Unidad de Genómica y Bioinformática, Núcleo Científico y Tecnológico en Biocursosos (BIOREN), Universidad de La Frontera                           | Alvaro Cerda; Benjamín Durán-Vinet; Benjamín Leyton Carcaman; Claudio Rodriguez; Claudio Vásquez; Israel Giacaman; Katterin Boddilla; María de la Luz Mora; Michel Abanto; Nicolás Saavedra; Pía Riquelme; Sindy Cabarca                                                                                                                                                                                                                                                                                                                                                                                                                                                                                                                                                                                                                                                                                                                                                                                                                                                                                                                                                                                                                                                                                                                                                                                                                                                                                                                                                                                                                     |
| EPI_ISL_3188644, EPI_ISL_3188835, EPI_ISL_3188840                                                                                                                                                         | Hospital General Universitario Gregorio Marañón                       | Hospital General Universitario Gregorio Marañón                                                                                                    | Cristina Rodríguez-Grande; Darío García de Viedma; Julia Suárez; Laura Pérez-Lago; Marta Herranz Martín; Patricia Muñoz; Pedro Sola Campoy; Pilar Catalán; Sergio Buenestado Serrano; Victor Manuel de la Cueva                                                                                                                                                                                                                                                                                                                                                                                                                                                                                                                                                                                                                                                                                                                                                                                                                                                                                                                                                                                                                                                                                                                                                                                                                                                                                                                                                                                                                              |
| EPI_ISL_3216175, EPI_ISL_3216192, EPI_ISL_3216214, EPI_ISL_3216226, EPI_ISL_3216395, EPI_ISL_3216403, EPI_ISL_3216409                                                                                     | see above                                                             | SeqCOVID-SPAIN consortium/IBV(CSIC)                                                                                                                | Carmen Molina Pardines and SeqCOVID-SPAIN consortium; Maripaz Ventero Martín                                                                                                                                                                                                                                                                                                                                                                                                                                                                                                                                                                                                                                                                                                                                                                                                                                                                                                                                                                                                                                                                                                                                                                                                                                                                                                                                                                                                                                                                                                                                                                 |
| EPI_ISL_418246                                                                                                                                                                                            | Hospital General y Universitario de Guadalajara                       | Instituto de Salud Carlos III                                                                                                                      | A. Monzón; F. Casas; I. González-Praetorius A.; I. Jiménez; Iglesias-Caballero; M. Camarero; M. Cuesta; M. González-Esguevillas; M. Molinero Calamita; M. Zaballos; P. Jiménez; S. Juliá; S. Pozo; S. Varona                                                                                                                                                                                                                                                                                                                                                                                                                                                                                                                                                                                                                                                                                                                                                                                                                                                                                                                                                                                                                                                                                                                                                                                                                                                                                                                                                                                                                                 |
| EPI_ISL_412964                                                                                                                                                                                            | Hospital Israelita Albert Einstein                                    | Instituto Adolfo Lutz Interdisciplinary Procedures Center Strategic Laboratory                                                                     | Andrew Rambaut; Claudia Regina Gonçalves; Claudio Tavares Sacchi; Daniela Bernardes Borges da Silva; Ester Cerdeira Sabino; Flávia Cristina da Silva Sales; Ingra Moraes Claro; Jaqueline Goes de Jesus; Joshua Quick; Maria do Carmo; Nicholas James Loman; Nuno Rodrigues Faria; Sampaio Tavares Timenetsky                                                                                                                                                                                                                                                                                                                                                                                                                                                                                                                                                                                                                                                                                                                                                                                                                                                                                                                                                                                                                                                                                                                                                                                                                                                                                                                                |
| EPI_ISL_416034                                                                                                                                                                                            | Hospital Israelita Albert Einstein                                    | Instituto Adolfo Lutz, Interdisciplinary Procedures Center, Strategic Laboratory                                                                   | Adriana Bugno; Adriano Abbud; Carlos Henrique Camargo; Claudia Regina Gonçalves; Claudio Tavares Sacchi; Daniela Bernardes Borges da Silva; Erica Valessa Ramos Gomes; Fabiana Cristina Pereira dos Santos; Maria do Carmo Sampaio Tavares Timenetsky; Simone Guadagnucci Morillo; Terezinha Maria de Paiva                                                                                                                                                                                                                                                                                                                                                                                                                                                                                                                                                                                                                                                                                                                                                                                                                                                                                                                                                                                                                                                                                                                                                                                                                                                                                                                                  |
| EPI_ISL_413016                                                                                                                                                                                            | Hospital Israelita Albert Einstein                                    | Instituto Adolfo Lutz, Interdisciplinary Procedures Center, Strategic Laboratory                                                                   | Andrew Rambaut; Claudia Regina Gonçalves; Claudio Tavares Sacchi; Ester Cerdeira Sabino; Fabiana Cristina Pereira dos Santos; Flávia Cristina da Silva Sales; Ingra Moraes Claro; Jaqueline Goes de Jesus; Joshua Quick; Maria do Carmo Sampaio Tavares Timenetsky; Nicholas James Loman; Nuno Rodrigues Faria                                                                                                                                                                                                                                                                                                                                                                                                                                                                                                                                                                                                                                                                                                                                                                                                                                                                                                                                                                                                                                                                                                                                                                                                                                                                                                                               |
| EPI_ISL_3244598                                                                                                                                                                                           | Hospital Margarita Maza de Juárez                                     | Microbial Genomics Laboratory                                                                                                                      | ; Alejandra García-Gasca; Alejandra Hernández-Terán; Alejandro Sánchez-Flores; Alfredo Herrera-Estrella; Alicia Ocaña-Mondragón; Andrew Comas-García; Angel Gustavo Salas-Lais; Antonio Loza Román; Bernardo Martínez-Miguel; Blanca Taboada; Brenda Irasema Maldonado-Meza; Bruno Gómez-Gil; Carla Ivón Herrera-Najera; Carlos F. Arias; Celia Boukadida; Clara Esperanza Sactacruz-Tinoco; Concepción Grajales-Muñiz; Consorcio Mexicano de Vigilancia Genómica (CoVIGen-Mex). Authors (in alphabetical order); Julio Elias Alvarado-Yaah; Cristóbal Cháidez-Quiróz; Cécilia Duque Molina; Cécilia Martínez- Rodríguez; Daniel Fregoso-Rueda; Daniel Lira Morales; Eduardo Becerril-Vargas; Fernando Fontove-Herrera; Fidencio Mejía-Nepomuceno; Francisco Pulido; Gloria Elena Espinosa-Ayala; Gloria María Molina-Salinas; Gloria Vazquez; Hector Esteban Paz-Juárez; Hector Montoya-Fuentes; Helen Haydee Fernanda Ramirez-Plascencia; Irvin González-López; Jean Pierre González; Jesús Hernández; Joel Armando Vázquez-Pérez.; Jorge Salas-Hernández; José Antonio Enciso-Moreno; José Arturo Martínez-Orozco; José Esteban Muñoz-Medina; José de Jesús Nuñez-Contreras; Juan Bautista Chale-Dzul; Julissa Enciso-Ibarra; Luis Alberto Ochoa-Carrera; Margarita Matias-Florentino; Mario Mújica-Sánchez; Marissa Perez-García; María Guadalupe Santiago-Mauricio; María Guadalupe de Jesús Mireles-Rivera; Nelly Sélem-Mojica; Pavel Isa; Ricardo Ciria Merce; Ricardo Grande; Rosa María Gutiérrez Rios; Santiago Avila-Ríos; Selene Zárate; Susana Lopez; Verónica Mata-Haro; Victor Eduardo García-Arias; Victor Hugo Borja-Aburto |
| EPI_ISL_1520111                                                                                                                                                                                           | Hospital Municipal Reynaldo Guerra Cajati                             | Instituto Adolfo Lutz, Interdisciplinary Procedures Center, Strategic Laboratory                                                                   | Caio Vinicius Dias Lopes; Claudia Regina Gonçalves; Claudio Tavares Sacchi; Erica Valessa Ramos Gomes; Karoline Rodrigues Campos                                                                                                                                                                                                                                                                                                                                                                                                                                                                                                                                                                                                                                                                                                                                                                                                                                                                                                                                                                                                                                                                                                                                                                                                                                                                                                                                                                                                                                                                                                             |
| EPI_ISL_468310                                                                                                                                                                                            | Hospital Sao Paulo de Ensino da UNIFESP                               | Instituto Adolfo Lutz, Interdisciplinary Procedures Center, Strategic Laboratory                                                                   | Claudia Regina Gonçalves; Claudio Tavares Sacchi; Erica Valessa Ramos Gomes                                                                                                                                                                                                                                                                                                                                                                                                                                                                                                                                                                                                                                                                                                                                                                                                                                                                                                                                                                                                                                                                                                                                                                                                                                                                                                                                                                                                                                                                                                                                                                  |
| EPI_ISL_3230025                                                                                                                                                                                           | Hospital Señor del Milagro                                            | Instituto de Patologia Vegetal (CIAP-INTA) on behalf of "Proyecto Argentino Interinstitucional de genómica de SARS-CoV-2" (PAIS Consortium)        | Debat, HJ.; FD; Fernanda Aguerro; Fernández; Lavaque Esteban; Marquez, N.; Pamela Cajal; Raskovsky Viviana; Veronica Lesser                                                                                                                                                                                                                                                                                                                                                                                                                                                                                                                                                                                                                                                                                                                                                                                                                                                                                                                                                                                                                                                                                                                                                                                                                                                                                                                                                                                                                                                                                                                  |
| EPI_ISL_1360288, EPI_ISL_1963999, EPI_ISL_2017717                                                                                                                                                         | Hospital Universitari Bellvitge                                       | Microbiology Department                                                                                                                            | Aida Gonzalez-Diaz; Carmen Ardanuy; Jordi Camara; Jordi Niubó; Laura Calatayud; M Angeles Domínguez; Miguel Fernandez-Huerta; Sara Marti                                                                                                                                                                                                                                                                                                                                                                                                                                                                                                                                                                                                                                                                                                                                                                                                                                                                                                                                                                                                                                                                                                                                                                                                                                                                                                                                                                                                                                                                                                     |
| EPI_ISL_1595836                                                                                                                                                                                           | Hospital Universitari Joan XXIII de Tarragona                         | Hospital Universitari Vall d'Hebron - Vall d'Hebron Institut de Recerca                                                                            | Andrés Antón; Ariadna Rando; Carla Castillo; Cristina Andrés; Damir García-Cehic; Josep F Abril; Josep Quer; Juliana Esperalba; María Carmen Martín; María Gema Codina; María Piñana; Tomàs Pumarola                                                                                                                                                                                                                                                                                                                                                                                                                                                                                                                                                                                                                                                                                                                                                                                                                                                                                                                                                                                                                                                                                                                                                                                                                                                                                                                                                                                                                                         |
| EPI_ISL_1582774, EPI_ISL_1582912                                                                                                                                                                          | Hospital Universitari Vall d'Hebron - Vall Hebron Institut de Recerca | Hospital Universitari Vall d'Hebron - Vall Hebron Institut de Recerca                                                                              | Andrés Antón; Ariadna Rando; Carla Castillo; Cristina Andrés; Damir García-Cehic; Josep F Abril; Josep Quer; Juliana Esperalba; María Carmen Martín; María Gema Codina; María Piñana; Tomàs Pumarola                                                                                                                                                                                                                                                                                                                                                                                                                                                                                                                                                                                                                                                                                                                                                                                                                                                                                                                                                                                                                                                                                                                                                                                                                                                                                                                                                                                                                                         |
| EPI_ISL_418861, EPI_ISL_1391110, EPI_ISL_1669352, EPI_ISL_3189789, EPI_ISL_3189826, EPI_ISL_3236309, EPI_ISL_3236338, EPI_ISL_3246729, EPI_ISL_3246735, EPI_ISL_3246788, EPI_ISL_6595288, EPI_ISL_6595290 | see above                                                             | Hospital Universitari Vall d'Hebron - Vall d'Hebron Institut de Recerca                                                                            | Alejandra González-Sánchez; Andrés Antón; Ariadna Rando; Carla Castillo; Cristina Andrés; Damir García-Cehic; Dàmir García-Cehic; Josep F Abril; Josep Quer; Juliana Esperalba; Karen García; María Carmen Martín; María Gema Codina; María Piñana; Mercedes Guerrero-Murillo; Rodrigo Vásquez; Tomàs Pumarola                                                                                                                                                                                                                                                                                                                                                                                                                                                                                                                                                                                                                                                                                                                                                                                                                                                                                                                                                                                                                                                                                                                                                                                                                                                                                                                               |
| EPI_ISL_3261189, EPI_ISL_3261217                                                                                                                                                                          | Hospital Universitari de Bellvitge                                    | Microbiology Department                                                                                                                            | Aida Gonzalez-Diaz; Carmen Ardanuy; Jordi Camara; Jordi Niubó; Laura Calatayud; M Angeles Domínguez; Sara Marti; Yolanda Hernandez                                                                                                                                                                                                                                                                                                                                                                                                                                                                                                                                                                                                                                                                                                                                                                                                                                                                                                                                                                                                                                                                                                                                                                                                                                                                                                                                                                                                                                                                                                           |
| EPI_ISL_417954, EPI_ISL_417963, EPI_ISL_417967                                                                                                                                                            | Hospital Universitario 12 de Octubre                                  | Hospital Universitario La Paz                                                                                                                      | Elias Dahdouh; Esther Viedma; Fernando Lázaro; Jesús Mingorance; Juan Carlos Galán; Julio García; Mª Dolores Folgueira; Natalia Stella; Rafael Cantón; Rafael Delgado; Sara González                                                                                                                                                                                                                                                                                                                                                                                                                                                                                                                                                                                                                                                                                                                                                                                                                                                                                                                                                                                                                                                                                                                                                                                                                                                                                                                                                                                                                                                         |
| EPI_ISL_2099967                                                                                                                                                                                           | Hospital Universitario Clínico San Cecilio                            | SeqCOVID-SPAIN consortium/IBV(CSIC)                                                                                                                | Adolfo de Salazar; Federico García; Laura Viñuela; Natalia Chueca and SeqCOVID-SPAIN consortium                                                                                                                                                                                                                                                                                                                                                                                                                                                                                                                                                                                                                                                                                                                                                                                                                                                                                                                                                                                                                                                                                                                                                                                                                                                                                                                                                                                                                                                                                                                                              |
| EPI_ISL_417969                                                                                                                                                                                            | Hospital Universitario La Paz                                         | Hospital Universitario La Paz                                                                                                                      | Elias Dahdouh; Esther Viedma; Fernando Lázaro; Jesús Mingorance; Juan Carlos Galán; Julio García; Mª Dolores Folgueira; Natalia Stella; Rafael Cantón; Rafael Delgado; Sara González                                                                                                                                                                                                                                                                                                                                                                                                                                                                                                                                                                                                                                                                                                                                                                                                                                                                                                                                                                                                                                                                                                                                                                                                                                                                                                                                                                                                                                                         |
| EPI_ISL_417979, EPI_ISL_417980, EPI_ISL_417981                                                                                                                                                            | Hospital Universitario Ramón y Cajal                                  | Hospital Universitario La Paz                                                                                                                      | Elias Dahdouh; Esther Viedma; Fernando Lázaro; Jesús Mingorance; Juan Carlos Galán; Julio García; Mª Dolores Folgueira; Natalia Stella; Rafael Cantón; Rafael Delgado; Sara González                                                                                                                                                                                                                                                                                                                                                                                                                                                                                                                                                                                                                                                                                                                                                                                                                                                                                                                                                                                                                                                                                                                                                                                                                                                                                                                                                                                                                                                         |
| EPI_ISL_7307146, EPI_ISL_7307164, EPI_ISL_7307190                                                                                                                                                         | Hospital Universitario San Ignacio                                    | Centro de Investigaciones en Microbiología y Biotecnología-UR (CIMBIUR), Facultad de Ciencias Naturales, Universidad del Rosario, Bogotá, Colombia | Alberto Paniz-Mondolfi; Angie Ramírez; Beatriz Ariza; Camilo A. Correa-Cárdenas; Carlos Gómez-Restrepo; Claudia Cardozo-Romero; Claudia Méndez; David-Santiago Quevedo; Guido España; Hernando Díaz; Juan David Ramírez; Juliana Cuervo-Rojas; Julie Pérez; Luz H. Patiño; Manuel-Antonio Franco; Maria-Clara Duque; Marina Muñoz; Nathalia Ballesteros; Nicolas Luna; Sergio Castañeda; Zulma M. Cucunubá                                                                                                                                                                                                                                                                                                                                                                                                                                                                                                                                                                                                                                                                                                                                                                                                                                                                                                                                                                                                                                                                                                                                                                                                                                   |
| EPI_ISL_1423928                                                                                                                                                                                           | Hospital Universitario Virgen de las Nieves de Granada-SAS            | SeqCOVID-SPAIN consortium/IBV(CSIC)                                                                                                                | Irene Pedrosa Corral; José M. Navarro-Marí and SeqCOVID-SPAIN consortium; Sara Sanbonmatsu Gámez                                                                                                                                                                                                                                                                                                                                                                                                                                                                                                                                                                                                                                                                                                                                                                                                                                                                                                                                                                                                                                                                                                                                                                                                                                                                                                                                                                                                                                                                                                                                             |
| EPI_ISL_6854857                                                                                                                                                                                           | Hospital Universitario da USP Sao Paulo                               | Instituto Adolfo Lutz, Interdisciplinary Procedures Center, Strategic Laboratory                                                                   | Ariadne Ferreira Amarante; Caio Vinicius Dias Lopes; Claudia Regina Gonçalves; Claudio Tavares Sacchi; Karoline Rodrigues Campos; Leonardo Tadeu de Araujo; Marlon Benedito Nascimento Santos                                                                                                                                                                                                                                                                                                                                                                                                                                                                                                                                                                                                                                                                                                                                                                                                                                                                                                                                                                                                                                                                                                                                                                                                                                                                                                                                                                                                                                                |
| EPI_ISL_1716581                                                                                                                                                                                           | Hospital Universitario de Gran Canaria Dr. Negrín                     | SeqCOVID-SPAIN consortium/IBV(CSIC)                                                                                                                | Ana Bordes Benítez and SeqCOVID-SPAIN consortium; Francisco J. Chamizo López; M. Carmen Pérez González                                                                                                                                                                                                                                                                                                                                                                                                                                                                                                                                                                                                                                                                                                                                                                                                                                                                                                                                                                                                                                                                                                                                                                                                                                                                                                                                                                                                                                                                                                                                       |
| EPI_ISL_1588962                                                                                                                                                                                           | Hospital Universitario de Guadalajara                                 | SeqCOVID-SPAIN consortium/IBV(CSIC)                                                                                                                | Alejandra González Praetorius y Mariela Martínez Ramírez and SeqCOVID-SPAIN consortium                                                                                                                                                                                                                                                                                                                                                                                                                                                                                                                                                                                                                                                                                                                                                                                                                                                                                                                                                                                                                                                                                                                                                                                                                                                                                                                                                                                                                                                                                                                                                       |

|                                                                                                                                                                                                                                                                                                                                                                                                                                                                                                                                                                                                                                                                                                                                                                        |                                                                                                                                                                                                                                                                                                                                                                                                                                                                                                                                                              |                                                                                                                                            |                                                                                                                                                                                                                                                                                                                                                                                                                                                                  |
|------------------------------------------------------------------------------------------------------------------------------------------------------------------------------------------------------------------------------------------------------------------------------------------------------------------------------------------------------------------------------------------------------------------------------------------------------------------------------------------------------------------------------------------------------------------------------------------------------------------------------------------------------------------------------------------------------------------------------------------------------------------------|--------------------------------------------------------------------------------------------------------------------------------------------------------------------------------------------------------------------------------------------------------------------------------------------------------------------------------------------------------------------------------------------------------------------------------------------------------------------------------------------------------------------------------------------------------------|--------------------------------------------------------------------------------------------------------------------------------------------|------------------------------------------------------------------------------------------------------------------------------------------------------------------------------------------------------------------------------------------------------------------------------------------------------------------------------------------------------------------------------------------------------------------------------------------------------------------|
| EPI_ISL_1916150                                                                                                                                                                                                                                                                                                                                                                                                                                                                                                                                                                                                                                                                                                                                                        | Hospital Universitario de La Ribera (Alzira, València)                                                                                                                                                                                                                                                                                                                                                                                                                                                                                                       | SeqCOVID-SPAIN consortium/IBV(CSIC)                                                                                                        | Julia González Cantó and SeqCOVID-SPAIN consortium; Olalla Martínez Macías                                                                                                                                                                                                                                                                                                                                                                                       |
| EPI_ISL_2614575                                                                                                                                                                                                                                                                                                                                                                                                                                                                                                                                                                                                                                                                                                                                                        | Hospital das Clinicas Luzia de Pinho Melo                                                                                                                                                                                                                                                                                                                                                                                                                                                                                                                    | Instituto Adolfo Lutz, Interdisciplinary Procedures Center, Strategic Laboratory                                                           | Caio Vinicius Dias Lopes; Claudia Regina Gonçalves; Claudio Tavares Sacchi; Erica Valessa Ramos Gomes; Karoline Rodrigues Campos; Leonardo Jose Tadeu de Araujo                                                                                                                                                                                                                                                                                                  |
| EPI_ISL_1242040                                                                                                                                                                                                                                                                                                                                                                                                                                                                                                                                                                                                                                                                                                                                                        | Hospital de Cabueñes                                                                                                                                                                                                                                                                                                                                                                                                                                                                                                                                         | Laboratorio de Virologia HUCA                                                                                                              | Abreu F; Alvarez-Arguelles ME; Boga JA; Castelló C; Costales I; Coto E; Gómez de Oña J; Martín-Rodríguez G; Melón S; Perez-Martínez Z; Rojo S; Sandoval M                                                                                                                                                                                                                                                                                                        |
| EPI_ISL_414577, EPI_ISL_414578                                                                                                                                                                                                                                                                                                                                                                                                                                                                                                                                                                                                                                                                                                                                         | Hospital de Talca, Chile                                                                                                                                                                                                                                                                                                                                                                                                                                                                                                                                     | Instituto de Salud Publica de Chile                                                                                                        | Alejandra Acevedo; Andrés E. Castillo; Bárbara Parra; Carolina Tambley; Gabriel Leal; Gisselle Barra; Jaime Lagos; Javier Tognarelli; Jorge Fernández.; Loredana Arata; Patricia Bustos; Paz Tapia; Rodrigo Fasce; Soledad Ulloa; Winston Andrade                                                                                                                                                                                                                |
| EPI_ISL_1671584, EPI_ISL_2099844                                                                                                                                                                                                                                                                                                                                                                                                                                                                                                                                                                                                                                                                                                                                       | Hospital de la Santa Creu i Sant Pau. Servicio de Microbiología                                                                                                                                                                                                                                                                                                                                                                                                                                                                                              | SeqCOVID-SPAIN consortium/IBV(CSIC)                                                                                                        | Elisenda Miró and SeqCOVID-SPAIN consortium; Ferran Navarro; Núria Rabella                                                                                                                                                                                                                                                                                                                                                                                       |
| EPI_ISL_1406284                                                                                                                                                                                                                                                                                                                                                                                                                                                                                                                                                                                                                                                                                                                                                        | Hospital del Oriente de Asturias                                                                                                                                                                                                                                                                                                                                                                                                                                                                                                                             | Laboratorio de Virologia HUCA                                                                                                              | Abreu F; Alvarez-Arguelles ME; Boga JA; Castelló C; Costales I; Coto E; Gómez de Oña J; Martín-Rodríguez G; Melón S; Perez-Martínez Z; Rojo S; Sandoval M                                                                                                                                                                                                                                                                                                        |
| EPI_ISL_524470                                                                                                                                                                                                                                                                                                                                                                                                                                                                                                                                                                                                                                                                                                                                                         | Hospital do Servidor Público Estadual Francisco Morato de Oliveira                                                                                                                                                                                                                                                                                                                                                                                                                                                                                           | Instituto Adolfo Lutz, Interdisciplinary Procedures Center, Strategic Laboratory                                                           | Claudia Regina Gonçalves; Claudio Tavares Sacchi; Erica Valessa Ramos Gomes                                                                                                                                                                                                                                                                                                                                                                                      |
| EPI_ISL_417486, EPI_ISL_417487                                                                                                                                                                                                                                                                                                                                                                                                                                                                                                                                                                                                                                                                                                                                         | Hospital of Southern Norway - Kristiansand, Department of Medical Microbiology                                                                                                                                                                                                                                                                                                                                                                                                                                                                               | Norwegian Institute of Public Health, Department of Virology                                                                               | Hilde Elshaug; Kamilla Heddeland Instefjord; Karoline Bragstad; Kathrine Stene-Johansen; Olav Hungnes                                                                                                                                                                                                                                                                                                                                                            |
| EPI_ISL_1511420, EPI_ISL_1303928, EPI_ISL_1621450, EPI_ISL_2003859                                                                                                                                                                                                                                                                                                                                                                                                                                                                                                                                                                                                                                                                                                     | Hospital of the University of Pennsylvania Molecular Pathology Lab                                                                                                                                                                                                                                                                                                                                                                                                                                                                                           | Bushman Lab - University of Pennsylvania                                                                                                   | Abigail Glascock; Aoife M. Roche; Arupa Ganguly; Ayannah S. Fitzgerald; Brendan Kelly; Jevon Graham-Wooten; John Everett; Kyle Rodino; Layla A. Khatib; Mike Feldman; Pascha Hokama; Ronald G. Collman and Frederic Bushman; Samantha A. Whiteside; Scott Sherrill-Mix; Shantan Reddy; Young Hwang                                                                                                                                                               |
| EPI_ISL_940815, EPI_ISL_2968606                                                                                                                                                                                                                                                                                                                                                                                                                                                                                                                                                                                                                                                                                                                                        | Houston Health Dept.                                                                                                                                                                                                                                                                                                                                                                                                                                                                                                                                         | Houston Health Dept.                                                                                                                       | Adolpho Lara; Pamela Brown; Ryker Penn; Yanlai Lai                                                                                                                                                                                                                                                                                                                                                                                                               |
| EPI_ISL_543202, EPI_ISL_544752, EPI_ISL_784319, EPI_ISL_786771, EPI_ISL_790395, EPI_ISL_1075494, EPI_ISL_1075948, EPI_ISL_1076107, EPI_ISL_1077110, EPI_ISL_1078421, EPI_ISL_1079220, EPI_ISL_1235710, EPI_ISL_1236094, EPI_ISL_1236682, EPI_ISL_1236982, EPI_ISL_1237279, EPI_ISL_1237309, EPI_ISL_1237507, EPI_ISL_1237580, EPI_ISL_1237848, EPI_ISL_1238443, EPI_ISL_1238545, EPI_ISL_1302928, EPI_ISL_1304697, EPI_ISL_2191113, EPI_ISL_2191596, EPI_ISL_2200464, EPI_ISL_2200724, EPI_ISL_2204948, EPI_ISL_2209274, EPI_ISL_2211475, EPI_ISL_2216390, EPI_ISL_2216980, EPI_ISL_2217236, EPI_ISL_2222790, EPI_ISL_2222966, EPI_ISL_2223966, EPI_ISL_2224454, EPI_ISL_2225264, EPI_ISL_2225507, EPI_ISL_5070542, EPI_ISL_5070755, EPI_ISL_5073503, EPI_ISL_5074465, | Chia-Wei Chou; Concepcion C. Cantu; Daniel Boutz; David W. Bernard; Ghazaleh Eskandari; Heather Hendrickson; Hoang A. T. Nguyen; Hung-Che Kuo; Ilya J. Finkelstein; J. Hunter Long; James J. Davis; Jason S. McLellan; Jessica Cambric; Jimmy Gollihar; Julie Goike; Kamyab Javanmardi; Kristina Reppond; Layne Pruitt; Madison N. Shyer; Marcus Nguyen; Matthew Ojeda Saavedra; Maulik Shukla; Muthiah Kumaraswami; Paul A. Christensen; Prasanti Yerramilli; Randall J. Olsen; Robert Olson; Ryan Gadd; S. Wesley Long; Sishir Subedi; and James M. Musser |                                                                                                                                            |                                                                                                                                                                                                                                                                                                                                                                                                                                                                  |
| see above                                                                                                                                                                                                                                                                                                                                                                                                                                                                                                                                                                                                                                                                                                                                                              | Houston Methodist Hospital                                                                                                                                                                                                                                                                                                                                                                                                                                                                                                                                   | Houston Methodist Hospital                                                                                                                 | CZB Cliahub Consortium                                                                                                                                                                                                                                                                                                                                                                                                                                           |
| EPI_ISL_1701447                                                                                                                                                                                                                                                                                                                                                                                                                                                                                                                                                                                                                                                                                                                                                        | Humboldt County Public Health Laboratory                                                                                                                                                                                                                                                                                                                                                                                                                                                                                                                     | Chan-Zuckerberg Biohub                                                                                                                     | Balázs Somogyi; Csaba Pereszlényi; Endre Gábor Tóth; Ferenc Jakab; Gábor Kemenesi; Ágnes Balázs-Nagy                                                                                                                                                                                                                                                                                                                                                             |
| EPI_ISL_1041198                                                                                                                                                                                                                                                                                                                                                                                                                                                                                                                                                                                                                                                                                                                                                        | Hungarian Defence Forces Military Medical Centre                                                                                                                                                                                                                                                                                                                                                                                                                                                                                                             | National Laboratory of Virology, Szentágothai Research Centre                                                                              |                                                                                                                                                                                                                                                                                                                                                                                                                                                                  |
| EPI_ISL_3199139, EPI_ISL_3199146, EPI_ISL_3199147, EPI_ISL_3199153, EPI_ISL_3199174, EPI_ISL_3199722, EPI_ISL_3199750, EPI_ISL_3199757                                                                                                                                                                                                                                                                                                                                                                                                                                                                                                                                                                                                                                 | Hyogo Prefectural Institute of Public Health science                                                                                                                                                                                                                                                                                                                                                                                                                                                                                                         | Pathogen Genomics Center, National Institute of Infectious Diseases                                                                        | Denshi Takai; Etsuko Saito; Kenichi Ogita; Kentaro Itokawa; Kyoko Suzuki; Makoto Kuroda; Masanori Hashino; Masatsugu Chikahira; Miki Ogi; Rina Tanaka; Tomohiro Oshibe; Tsuyoshi Sekizuka; Yumi Akiyama                                                                                                                                                                                                                                                          |
| EPI_ISL_2790949                                                                                                                                                                                                                                                                                                                                                                                                                                                                                                                                                                                                                                                                                                                                                        | Hôpital                                                                                                                                                                                                                                                                                                                                                                                                                                                                                                                                                      | National Reference Center for Viruses of Respiratory Infections, Institut Pasteur, Paris                                                   | Angela Brisebarre; BéNéDicte Roquebert; Camille Capel; Christophe Malabat; Corinne Mafraais; Emmanuelle Pernal; Etienne Simon-Lorière; Frédéric Lemoine; Louise Lefrançois; Marion Barbet; Maud Vanpeene; Méline Bizard; Sylvie Behillili; Sylvie Van der Werf; Vincent Enouf                                                                                                                                                                                    |
| EPI_ISL_1296385                                                                                                                                                                                                                                                                                                                                                                                                                                                                                                                                                                                                                                                                                                                                                        | Hôpital Bichat Claude Bernard, Laboratoire de Virologie                                                                                                                                                                                                                                                                                                                                                                                                                                                                                                      | IAME UMR1137 Inserm, Université de Paris, Hôpital Bichat                                                                                   | Alexandre Storto; Amélie Recoing; Antoine Bridier-Nahmias; Benoit Visseaux; Charlotte Charpentier; Diane Descamps; Gilles Collin; Lena Daniel; Mélanie Bertine; Nadhira Houhou-Fidouh; Quentin Le Hingrat; Siham Hamri                                                                                                                                                                                                                                           |
| EPI_ISL_1695981                                                                                                                                                                                                                                                                                                                                                                                                                                                                                                                                                                                                                                                                                                                                                        | Hôpital Bichat-Claude Bernard                                                                                                                                                                                                                                                                                                                                                                                                                                                                                                                                | Department of Virology, Henri Mondor University Hospital, Assistance Publique Hôpitaux de Paris, Université Paris-Est Créteil, INSERM U955 | Alexandre Soulier; Christophe Rodriguez; Elisabeth Trawinski; Guillaume Gricourt; Jean-Michel Pawlotsky; Melissa N'Debi; Slim Fourati; Vanessa Demontant                                                                                                                                                                                                                                                                                                         |
| EPI_ISL_912742, EPI_ISL_912958, EPI_ISL_1085651, EPI_ISL_1396799                                                                                                                                                                                                                                                                                                                                                                                                                                                                                                                                                                                                                                                                                                       | Hôpital Henri Mondor                                                                                                                                                                                                                                                                                                                                                                                                                                                                                                                                         | Department of Virology, Henri Mondor University Hospital, Assistance Publique Hôpitaux de Paris, Université Paris-Est Créteil, INSERM U955 | Alexandre Soulier; Christophe Rodriguez; Elisabeth Trawinski; Guillaume Gricourt; Jean-Michel Pawlotsky; Melissa N'Debi; Slim Fourati; Vanessa Demontant                                                                                                                                                                                                                                                                                                         |
| EPI_ISL_415650                                                                                                                                                                                                                                                                                                                                                                                                                                                                                                                                                                                                                                                                                                                                                         | Hôpital Instruction des Armées - BEGIN                                                                                                                                                                                                                                                                                                                                                                                                                                                                                                                       | National Reference Center for Viruses of Respiratory Infections, Institut Pasteur, Paris                                                   | Angela Brisebarre; Christine Bigaillon; Flora Donati Vincent Enouf; Marion Barbet; Maud Vanpeene; Méline Bizard; Mélinie Albert; Sylvie Behillili; Sylvie van der Werf                                                                                                                                                                                                                                                                                           |
| EPI_ISL_1707751, EPI_ISL_1707758                                                                                                                                                                                                                                                                                                                                                                                                                                                                                                                                                                                                                                                                                                                                       | Hôpital Saint-Louis                                                                                                                                                                                                                                                                                                                                                                                                                                                                                                                                          | Department of Virology, Henri Mondor University Hospital, Assistance Publique Hôpitaux de Paris, Université Paris-Est Créteil, INSERM U955 | Alexandre Soulier; Christophe Rodriguez; Elisabeth Trawinski; Guillaume Gricourt; Jean-Michel Pawlotsky; Melissa N'Debi; Slim Fourati; Vanessa Demontant                                                                                                                                                                                                                                                                                                         |
| EPI_ISL_653770                                                                                                                                                                                                                                                                                                                                                                                                                                                                                                                                                                                                                                                                                                                                                         | I.R.C.C.S. "S. De Bellis" - Ente Ospedaliero                                                                                                                                                                                                                                                                                                                                                                                                                                                                                                                 | Istituto Zooprofilattico Sperimentale della Puglia e della Basilicata                                                                      | Bianco A.; Capozzi L.; Del Sembro L.; Lippolis A.; Manzulli V; Notarnicola M.; Pace L.; Parisi A.; Rondinone V.                                                                                                                                                                                                                                                                                                                                                  |
| EPI_ISL_1086036                                                                                                                                                                                                                                                                                                                                                                                                                                                                                                                                                                                                                                                                                                                                                        | IAL Regional de Bauru                                                                                                                                                                                                                                                                                                                                                                                                                                                                                                                                        | Instituto Adolfo Lutz, Interdisciplinary Procedures Center, Strategic Laboratory                                                           | Caio Vinicius Dias Lopes; Claudia Regina Gonçalves; Claudio Tavares Sacchi; Erica Valessa Ramos Gomes; Karoline Rodrigues Campos                                                                                                                                                                                                                                                                                                                                 |
| EPI_ISL_1293071                                                                                                                                                                                                                                                                                                                                                                                                                                                                                                                                                                                                                                                                                                                                                        | IAL Regional de Sorocaba                                                                                                                                                                                                                                                                                                                                                                                                                                                                                                                                     | Instituto Adolfo Lutz, Interdisciplinary Procedures Center, Strategic Laboratory                                                           | Caio Vinicius Dias Lopes; Claudia Regina Gonçalves; Claudio Tavares Sacchi; Erica Valessa Ramos Gomes; Karoline Rodrigues Campos                                                                                                                                                                                                                                                                                                                                 |
| EPI_ISL_2189674, EPI_ISL_2189847                                                                                                                                                                                                                                                                                                                                                                                                                                                                                                                                                                                                                                                                                                                                       | ICMR-National Institute of Virology                                                                                                                                                                                                                                                                                                                                                                                                                                                                                                                          | NCDC Delhi, Biotechnology Division                                                                                                         | A Walimbe; A.Awhale; A.Titkare; B.Apoorva; G.Divekar; H.Kengale; Hema Gogia; Hemlata Lali; K.P.Shinde; K.Iyengar; K.Korabu; Kalaiarasan Ponnusamy; M.L.Choudhary; M.Das; Mahesh S Dhar; Manoj K. Singh; Meena Datta; Partha Rakshit; Preeti Madan; Priyanka Singh; R.Verma; Radhakrishnan V. S.; Robin Marwal; S.Jadhav; S.Bhorekar; S.Jadhav; S.Shelkande; Sandhya Kabra; Sujeet K Singh; T.Sanjeevi; U.Saha; Uma Sharma; V.Malik; V.Autude; V.Vipat; Z. Sayyed |
| EPI_ISL_1704016, EPI_ISL_1704058, EPI_ISL_1704483, EPI_ISL_1704500, EPI_ISL_1841251, EPI_ISL_1841254, EPI_ISL_1841256, EPI_ISL_1841310, EPI_ISL_1970462, EPI_ISL_1970468, EPI_ISL_3244644, EPI_ISL_3244668, EPI_ISL_3244700                                                                                                                                                                                                                                                                                                                                                                                                                                                                                                                                            | ICMR-National Institute of Virology - INSAOC                                                                                                                                                                                                                                                                                                                                                                                                                                                                                                                 | NIV Influenza                                                                                                                              | NIV; Potdar; Pune; Varsha on behalf of National Influenza Centre                                                                                                                                                                                                                                                                                                                                                                                                 |
| EPI_ISL_2621164                                                                                                                                                                                                                                                                                                                                                                                                                                                                                                                                                                                                                                                                                                                                                        | ICMT-APARTADO                                                                                                                                                                                                                                                                                                                                                                                                                                                                                                                                                | Universidad Nacional de Colombia - Laboratorio Genómico One Health                                                                         | Andres F. Cardona-Rios; Carlos Franco-Muñoz; Carolina Muñoz-Arango; Celeny Ortiz; Daniel O. Maldonado-Perez; Diego A. Álvarez-Díaz; Hector Alejandro Ruiz-Moreno; Idabely Betancur Ortiz; Jorge E. Osorio; Juan P. Hernandez-Ortiz; Karl A Ciudoridis; Katherine Laiton-Donato; Laura Silvana Perez; Lina M. Hurtado; Marcela Mercado-Reyes; Maria Angélica Maya; Maria Stella López; Rita Almanza Payares; Sandra Ines Cano; Simón Villegas Velásquez           |
| EPI_ISL_3247165                                                                                                                                                                                                                                                                                                                                                                                                                                                                                                                                                                                                                                                                                                                                                        | IDEEL                                                                                                                                                                                                                                                                                                                                                                                                                                                                                                                                                        | IDEEL                                                                                                                                      | Carla Cerami; Jessica T. Lin; Zachary R. Popkin-Hall                                                                                                                                                                                                                                                                                                                                                                                                             |
| EPI_ISL_7139295                                                                                                                                                                                                                                                                                                                                                                                                                                                                                                                                                                                                                                                                                                                                                        | IDIME                                                                                                                                                                                                                                                                                                                                                                                                                                                                                                                                                        | Laboratorio de biotecnología, Universidad Icesi                                                                                            | Adrián Camilo Rodríguez Ararat; Diana M. Florez Giraldo; Marcela Mercado; María F. Villegas Torres; María I. Gutiérrez López; Paola A. Caicedo Burbano; Programa Nacional de Caracterización Genómica de SARS-CoV-2; Sara González Henao                                                                                                                                                                                                                         |
| EPI_ISL_5858990                                                                                                                                                                                                                                                                                                                                                                                                                                                                                                                                                                                                                                                                                                                                                        | IDIME - Sede Clínica Nueva de Cali                                                                                                                                                                                                                                                                                                                                                                                                                                                                                                                           | Universidad del Valle                                                                                                                      | Andres Castillo; Beatriz Parra & Programa Nacional de Caracterización Genómica de SARS-CoV-2; Diana López-Alvarez; Erica M. Aristizabal; Flor Saa; Melissa Solarte; Nelson Rivera Franco                                                                                                                                                                                                                                                                         |
| EPI_ISL_404253, EPI_ISL_410045                                                                                                                                                                                                                                                                                                                                                                                                                                                                                                                                                                                                                                                                                                                                         | IL Department of Public Health Chicago Laboratory                                                                                                                                                                                                                                                                                                                                                                                                                                                                                                            | Pathogen Discovery, Respiratory Viruses Branch, Division of Viral Diseases, Centers for Diseases Control and Prevention                    | Anna Uehara; Brett L. Whitaker; Brian Lynch; Clinton R. Paden; Janna' R. Murray; Jing Zhang; Krista Queen; Lijuan Wang; Senthil Kumar K. Sakthivel; Shifaz Kamili; Stephen Lindstrom; Susan I. Gerber; Suxiang Tong; Xiaoyan Lu; Yan Li; Ying Tao                                                                                                                                                                                                                |
| EPI_ISL_3242015                                                                                                                                                                                                                                                                                                                                                                                                                                                                                                                                                                                                                                                                                                                                                        | IL Dept. of Public Health Springfield Laboratory                                                                                                                                                                                                                                                                                                                                                                                                                                                                                                             | Centers for Disease Control and Prevention Division of Viral Diseases, Pathogen Discovery                                                  | Alex Burgin; Ben L. Rambo-Martin; Clinton R. Paden; Dakota Howard; Dave Wentworth; Dhvani Batra; Jasmine Padilla; Justin Lee; Krista Queen; Kristen Knipe; Kristine Lacek; Mark Burroughs; Matthew Schmerer; Meghan Bentz; Mili Sheth; Peter Cook; Sam Shepard; Sarah Nobles; Suxiang Tong; Vivien Dugan; Yvette Inoaurnhli                                                                                                                                      |
| EPI_ISL_2485190                                                                                                                                                                                                                                                                                                                                                                                                                                                                                                                                                                                                                                                                                                                                                        | ILV Kärnten                                                                                                                                                                                                                                                                                                                                                                                                                                                                                                                                                  | Bergthaler laboratory, CeMM Research Center for Molecular Medicine of the Austrian Academy of Sciences                                     | Andreas Bergthaler; Anna Schedl; Bekir Erguner; Benedikt Agerer; Christoph Bock; Fabian Amman; Jan Laine; Lukas Endler; Maelle Le Moing; Martin Senekowitsch; Michael Schuster; Petr Triska; Thomas Penz                                                                                                                                                                                                                                                         |
| EPI_ISL_4850561                                                                                                                                                                                                                                                                                                                                                                                                                                                                                                                                                                                                                                                                                                                                                        | IMAT S.A.S.                                                                                                                                                                                                                                                                                                                                                                                                                                                                                                                                                  | Instituto Nacional de Salud-Dirección de Investigación en Salud Pública                                                                    | Carlos Franco-Muñoz; Carmen Osorio; Diana Malo; Diego A. Álvarez-Díaz; Diego Andrés Prada; Gerardo Santamaría; Hector Alejandro Ruiz-Moreno; Jhonattan Reales-González; Jorge Rivera; Juan Camilo Martínez; Julian Naizaque; Katherine Laiton-Donato; Lisseth Pardo; Magdalena Wiesner; Marcela Mercado-Reyes; Maria T. Herrera-Sepúlveda; Marta Lopez Blanco; Martha Lucia Ospina Martinez; Paola Rojas; Sergio Gomez; Sheryll Corchuelo; Ángela Alarcon Cruz   |
| EPI_ISL_1151939,                                                                                                                                                                                                                                                                                                                                                                                                                                                                                                                                                                                                                                                                                                                                                       | IMD - Labor Oderland                                                                                                                                                                                                                                                                                                                                                                                                                                                                                                                                         | Robert Koch Institute                                                                                                                      |                                                                                                                                                                                                                                                                                                                                                                                                                                                                  |

|                                                                                                                                                                                                                                                                                                                                                                                                                                                                                                                                                                                                                                                                                                                                                                                                                                                                                                                                                                                                                                                                                                                                                                                                                                                                                                          |                                                                                                     |                                                                                              |                                                                                                                                                                                                                                                                                                                                                                                                                                                                                                                                                                                                                                                                                                              |
|----------------------------------------------------------------------------------------------------------------------------------------------------------------------------------------------------------------------------------------------------------------------------------------------------------------------------------------------------------------------------------------------------------------------------------------------------------------------------------------------------------------------------------------------------------------------------------------------------------------------------------------------------------------------------------------------------------------------------------------------------------------------------------------------------------------------------------------------------------------------------------------------------------------------------------------------------------------------------------------------------------------------------------------------------------------------------------------------------------------------------------------------------------------------------------------------------------------------------------------------------------------------------------------------------------|-----------------------------------------------------------------------------------------------------|----------------------------------------------------------------------------------------------|--------------------------------------------------------------------------------------------------------------------------------------------------------------------------------------------------------------------------------------------------------------------------------------------------------------------------------------------------------------------------------------------------------------------------------------------------------------------------------------------------------------------------------------------------------------------------------------------------------------------------------------------------------------------------------------------------------------|
| EPI_ISL_1565426                                                                                                                                                                                                                                                                                                                                                                                                                                                                                                                                                                                                                                                                                                                                                                                                                                                                                                                                                                                                                                                                                                                                                                                                                                                                                          |                                                                                                     |                                                                                              |                                                                                                                                                                                                                                                                                                                                                                                                                                                                                                                                                                                                                                                                                                              |
| EPI_ISL_1349477,<br>EPI_ISL_1638536                                                                                                                                                                                                                                                                                                                                                                                                                                                                                                                                                                                                                                                                                                                                                                                                                                                                                                                                                                                                                                                                                                                                                                                                                                                                      | IMD Labor Frankfurt                                                                                 | Robert Koch Institute                                                                        |                                                                                                                                                                                                                                                                                                                                                                                                                                                                                                                                                                                                                                                                                                              |
| EPI_ISL_1516439                                                                                                                                                                                                                                                                                                                                                                                                                                                                                                                                                                                                                                                                                                                                                                                                                                                                                                                                                                                                                                                                                                                                                                                                                                                                                          | IN State Department of Health Laboratory Services                                                   | Centers for Disease Control and Prevention Division of Viral Diseases, Pathogen Discovery    | Aison Lauffer Halpin; Ben L. Rambo-Martin; Clinton R. Paden; Dakota Howard; Darlene Wagner; Dave Wentworth; Dhvani Batra; Jasmine Padilla; Justin Lee; Katie Dillon; Krista Queen; Kristen Knipe; Kristine Lacey; Mark Burroughs; Matthew Schmeier; Mili Sheth; Peter Cook; Sam Shepard; Sarah Nobles; Shoshona Le; Suxiang Tong; Vivien Dugan; Yvette Unoarumi                                                                                                                                                                                                                                                                                                                                              |
| EPI_ISL_1528244,<br>EPI_ISL_1563644,<br>EPI_ISL_2789888                                                                                                                                                                                                                                                                                                                                                                                                                                                                                                                                                                                                                                                                                                                                                                                                                                                                                                                                                                                                                                                                                                                                                                                                                                                  | IN State Department of Health Laboratory Services                                                   | IN State Department of Health Laboratory Services                                            | Ankita Kashikar; Brian Pope; Cassandra Campion; Jamie Yeadon; Kyle Brownlee; Lixia Liu; Mark Glazier; Melissa Hindenlang                                                                                                                                                                                                                                                                                                                                                                                                                                                                                                                                                                                     |
| EPI_ISL_603142,<br>EPI_ISL_1575300                                                                                                                                                                                                                                                                                                                                                                                                                                                                                                                                                                                                                                                                                                                                                                                                                                                                                                                                                                                                                                                                                                                                                                                                                                                                       | INMI Lazzaro Spallanzani IRCCS                                                                      | INMI Lazzaro Spallanzani IRCCS                                                               | A Di Caro; Antonino Di Caro; B Bartolini; Barbara Bartolini; CEM Gruber; Cesare E.M. Gruber; E Giombini; Emanuela Giombini; F Messina; F Santini; Francesco Messina; G Bonfiglio; M Rueca; MR Capobianchi; Maria R. Capobianchi; Martina Rueca; O Butera; Simone Lanini                                                                                                                                                                                                                                                                                                                                                                                                                                      |
| EPI_ISL_1547379,<br>EPI_ISL_3204549                                                                                                                                                                                                                                                                                                                                                                                                                                                                                                                                                                                                                                                                                                                                                                                                                                                                                                                                                                                                                                                                                                                                                                                                                                                                      | INSA                                                                                                | Instituto Nacional de Saude (INSA)                                                           | Borges et al                                                                                                                                                                                                                                                                                                                                                                                                                                                                                                                                                                                                                                                                                                 |
| EPI_ISL_3267376,<br>EPI_ISL_3267385,<br>EPI_ISL_3267386                                                                                                                                                                                                                                                                                                                                                                                                                                                                                                                                                                                                                                                                                                                                                                                                                                                                                                                                                                                                                                                                                                                                                                                                                                                  | INSACOG Surveillance                                                                                | INSACOG at CSIR Institute of Genomics and Integrative Biology                                | INSACOG                                                                                                                                                                                                                                                                                                                                                                                                                                                                                                                                                                                                                                                                                                      |
| EPI_ISL_3189033, EPI_ISL_3189048, EPI_ISL_3189080, EPI_ISL_3189090, EPI_ISL_3189117, EPI_ISL_3189122, EPI_ISL_3189124, EPI_ISL_3189132                                                                                                                                                                                                                                                                                                                                                                                                                                                                                                                                                                                                                                                                                                                                                                                                                                                                                                                                                                                                                                                                                                                                                                   |                                                                                                     |                                                                                              |                                                                                                                                                                                                                                                                                                                                                                                                                                                                                                                                                                                                                                                                                                              |
| see above                                                                                                                                                                                                                                                                                                                                                                                                                                                                                                                                                                                                                                                                                                                                                                                                                                                                                                                                                                                                                                                                                                                                                                                                                                                                                                | INSACOG-Assam                                                                                       | National Institute of Biomedical Genomics - INSACOG                                          | Ajanta Sharma; Arindam Maitra; Kailash Chamuah; Lahari Saikia; Nidhan Kumar Biswas; Saumitra Das; Sreedhar Chinnaswamy                                                                                                                                                                                                                                                                                                                                                                                                                                                                                                                                                                                       |
| EPI_ISL_7223166, EPI_ISL_7223187, EPI_ISL_7223247, EPI_ISL_7223285, EPI_ISL_7223321, EPI_ISL_7223330, EPI_ISL_7223364, EPI_ISL_7223384, EPI_ISL_7223490, EPI_ISL_7223546, EPI_ISL_7223560, EPI_ISL_7223570, EPI_ISL_7223593, EPI_ISL_7223602, EPI_ISL_7223693, EPI_ISL_7223863, EPI_ISL_7223985, EPI_ISL_7224050, EPI_ISL_7224076, EPI_ISL_7224084, EPI_ISL_7224163, EPI_ISL_7224587, EPI_ISL_7224628, EPI_ISL_7224630, EPI_ISL_7224632, EPI_ISL_7224639, EPI_ISL_7224660, EPI_ISL_7224697, EPI_ISL_7224718, EPI_ISL_7224754, EPI_ISL_7224756, EPI_ISL_7224758, EPI_ISL_7224762, EPI_ISL_7224867, EPI_ISL_7224922, EPI_ISL_7224929, EPI_ISL_7224934, EPI_ISL_7224952, EPI_ISL_7224996, EPI_ISL_7225052, EPI_ISL_7225060, EPI_ISL_7225062, EPI_ISL_7225101, EPI_ISL_7225109, EPI_ISL_7225166, EPI_ISL_7225189, EPI_ISL_7225203, EPI_ISL_7225208, EPI_ISL_7225232, EPI_ISL_7225288, EPI_ISL_7225310, EPI_ISL_7225348, EPI_ISL_7225357, EPI_ISL_7225372, EPI_ISL_7225376, EPI_ISL_7225385, EPI_ISL_7225409, EPI_ISL_7225418, EPI_ISL_7225571, EPI_ISL_7225586, EPI_ISL_7225592, EPI_ISL_7225618, EPI_ISL_7225715, EPI_ISL_7225744, EPI_ISL_7225748, EPI_ISL_7225756, EPI_ISL_7225808, EPI_ISL_7225823, EPI_ISL_7225892, EPI_ISL_7226190, EPI_ISL_7226246, EPI_ISL_7226248, EPI_ISL_7226323, EPI_ISL_7226332 |                                                                                                     |                                                                                              |                                                                                                                                                                                                                                                                                                                                                                                                                                                                                                                                                                                                                                                                                                              |
| see above                                                                                                                                                                                                                                                                                                                                                                                                                                                                                                                                                                                                                                                                                                                                                                                                                                                                                                                                                                                                                                                                                                                                                                                                                                                                                                | INSACOG-IGIB and Kerala State SARS-COV-2 Genome Surveillance Programme (GENESCOV2)                  | INSACOG and GENESCOV2 at CSIR Institute of Genomics and Integrative Biology                  | INSACOG-IGIB and Kerala State SARS-COV-2 Genome Surveillance Programme (GENESCOV2)                                                                                                                                                                                                                                                                                                                                                                                                                                                                                                                                                                                                                           |
| EPI_ISL_3189454,<br>EPI_ISL_3189476                                                                                                                                                                                                                                                                                                                                                                                                                                                                                                                                                                                                                                                                                                                                                                                                                                                                                                                                                                                                                                                                                                                                                                                                                                                                      | INSACOG-Mizoram                                                                                     | National Institute of Biomedical Genomics - INSACOG                                          | Arindam Maitra; Gracy Laldinmawli; N Senthil Kumar; Nidhan Kumar Biswas; Saumitra Das; Sreedhar Chinnaswamy; Swagnik Roy                                                                                                                                                                                                                                                                                                                                                                                                                                                                                                                                                                                     |
| EPI_ISL_3189508,<br>EPI_ISL_3189522,<br>EPI_ISL_3189525,<br>EPI_ISL_3189580                                                                                                                                                                                                                                                                                                                                                                                                                                                                                                                                                                                                                                                                                                                                                                                                                                                                                                                                                                                                                                                                                                                                                                                                                              | INSACOG-NAGALAND                                                                                    | National Institute of Biomedical Genomics - INSACOG                                          | Arindam Maitra; Chenole Keppen; Nidhan Kumar Biswas; Saumitra Das; Sreedhar Chinnaswamy; Vinotsole Khamo; Wetetsho Kapfo                                                                                                                                                                                                                                                                                                                                                                                                                                                                                                                                                                                     |
| EPI_ISL_1419249, EPI_ISL_1419376, EPI_ISL_1419531, EPI_ISL_3189227, EPI_ISL_3189237, EPI_ISL_3189244, EPI_ISL_3189261, EPI_ISL_3189265, EPI_ISL_3189275, EPI_ISL_3189280, EPI_ISL_3189295, EPI_ISL_3189311                                                                                                                                                                                                                                                                                                                                                                                                                                                                                                                                                                                                                                                                                                                                                                                                                                                                                                                                                                                                                                                                                               |                                                                                                     |                                                                                              |                                                                                                                                                                                                                                                                                                                                                                                                                                                                                                                                                                                                                                                                                                              |
| see above                                                                                                                                                                                                                                                                                                                                                                                                                                                                                                                                                                                                                                                                                                                                                                                                                                                                                                                                                                                                                                                                                                                                                                                                                                                                                                | INSACOG-WB                                                                                          | National Institute of Biomedical Genomics - INSACOG                                          | Ajay Chakraborti; Arindam Maitra; Bhaswati Bandyopadhyay; Nidhan Kumar Biswas; Saumitra Das; Sreedhar Chinnaswamy; Tamal Ghosh                                                                                                                                                                                                                                                                                                                                                                                                                                                                                                                                                                               |
| EPI_ISL_3274410,<br>EPI_ISL_3274472,<br>EPI_ISL_3274477,<br>EPI_ISL_3274508                                                                                                                                                                                                                                                                                                                                                                                                                                                                                                                                                                                                                                                                                                                                                                                                                                                                                                                                                                                                                                                                                                                                                                                                                              | INSPI-CRN DE INFLUENZA Y OTROS VIRUS RESPIRATORIOS                                                  | NIC-INSPI                                                                                    | Alfredo Bruno; Domenica de Mora.; Jimmy Garcés; Johanna Laines; Lizbeth Patiño; Manuel Gonzalez; Marcela Mejia; Maritza Olmedo; Michelle Páez                                                                                                                                                                                                                                                                                                                                                                                                                                                                                                                                                                |
| EPI_ISL_3267869                                                                                                                                                                                                                                                                                                                                                                                                                                                                                                                                                                                                                                                                                                                                                                                                                                                                                                                                                                                                                                                                                                                                                                                                                                                                                          | INTERLAB                                                                                            | Omics Sciences Laboratory                                                                    | Daniela Bravo Prieto; Darlyn Amaya; Derly Andrade Molina; Elena Romero Cevallos; Esteban Fernández; Gabriel Morey León; Juan Carlos Fernández Cadena; Karen Muñoz; Kathryn Sacheri; Rubén Armas González                                                                                                                                                                                                                                                                                                                                                                                                                                                                                                     |
| EPI_ISL_751388                                                                                                                                                                                                                                                                                                                                                                                                                                                                                                                                                                                                                                                                                                                                                                                                                                                                                                                                                                                                                                                                                                                                                                                                                                                                                           | IRCCS Sacro Cuore Don Calabria Hospital, Department of Infectious, Tropical Diseases & Microbiology | University of Verona, Department of Biotechnology                                            | Antonio Mori; Chiara Degli Esposti; Chiara Piubelli; Cristina Beltrami; Elena Pomari; Emanuela Cosentino; Giulia Lopatriello; Luca Marcolungo; Massimo Delledonne; Michela Deiana                                                                                                                                                                                                                                                                                                                                                                                                                                                                                                                            |
| EPI_ISL_3218898,<br>EPI_ISL_3218902,<br>EPI_ISL_3281542                                                                                                                                                                                                                                                                                                                                                                                                                                                                                                                                                                                                                                                                                                                                                                                                                                                                                                                                                                                                                                                                                                                                                                                                                                                  | IVY3 Central Lab, Vanderbilt University Medical Center                                              | Lauring Lab, University of Michigan, Department of Microbiology and Immunology               | Gilbert; Valesano                                                                                                                                                                                                                                                                                                                                                                                                                                                                                                                                                                                                                                                                                            |
| EPI_ISL_1390587,<br>EPI_ISL_1509465                                                                                                                                                                                                                                                                                                                                                                                                                                                                                                                                                                                                                                                                                                                                                                                                                                                                                                                                                                                                                                                                                                                                                                                                                                                                      | IZSM                                                                                                | TIGEM                                                                                        | Andrea Ballabio; Anna Manfredi; Antonio Grimaldi; Antonio Grimaldi Patrizia Annunziata Francesco Panariello Biancamaria Pierri Claudia Tiberio Valentina Bouche Chiara Colantuono Maria Concetta Cuomo Denise Di Concilio Lucio Di Filippo Anna Manfredi Marcello Salvi Antonio Limone Luigi Atripaldi Pellegrino Cerino Andrea Ballabio Davide Cacchiarelli; Antonio Limone Luigi Atripaldi Pellegrino Cerino; Biancamaria Pierri Claudia Tiberio Valentina Bouche; Chiara Colantuono; Davide Cacchiarelli; Denise Di Concilio; Francesco Panariello; Lucio Di Filippo; Marcello Salvi; Maria Concetta Cuomo; Patrizia Annunziata                                                                           |
| see above                                                                                                                                                                                                                                                                                                                                                                                                                                                                                                                                                                                                                                                                                                                                                                                                                                                                                                                                                                                                                                                                                                                                                                                                                                                                                                | Ibaraki Prefectural Institute of Public Health                                                      | Ibaraki Prefectural Institute of Public Health                                               | Keiko Goto; Kentaro Itokawa; Makoto Kuroda; Masanori Hashino; Rina Tanaka; Ryo Kashimura; Shuichi Osawa; Tsuyoshi Sekizuka                                                                                                                                                                                                                                                                                                                                                                                                                                                                                                                                                                                   |
| EPI_ISL_1671396                                                                                                                                                                                                                                                                                                                                                                                                                                                                                                                                                                                                                                                                                                                                                                                                                                                                                                                                                                                                                                                                                                                                                                                                                                                                                          | IdISSC/Hospital Clínico San Carlos de Madrid                                                        | SeqCOVID-SPAIN consortium/IBV(CSIC)                                                          | Alberto Delgado-Inbarren; Esther Culebras López; Jorge Matias-Guiu; Luis Ortega Medina; Silvia Sánchez Ramón; Ulises Gómez-Pinedo and SeqCOVID-SPAIN consortium; Vicente Estrada Pérez                                                                                                                                                                                                                                                                                                                                                                                                                                                                                                                       |
| EPI_ISL_3272357, EPI_ISL_3272371, EPI_ISL_3272378, EPI_ISL_3272415, EPI_ISL_3272477, EPI_ISL_3272527, EPI_ISL_3273175                                                                                                                                                                                                                                                                                                                                                                                                                                                                                                                                                                                                                                                                                                                                                                                                                                                                                                                                                                                                                                                                                                                                                                                    |                                                                                                     |                                                                                              |                                                                                                                                                                                                                                                                                                                                                                                                                                                                                                                                                                                                                                                                                                              |
| see above                                                                                                                                                                                                                                                                                                                                                                                                                                                                                                                                                                                                                                                                                                                                                                                                                                                                                                                                                                                                                                                                                                                                                                                                                                                                                                | Idaho Bureau of Laboratories                                                                        | Boise VA Medical Center, PALMS                                                               | Aimee Ceniseros; Cheri Lamb McFarlane; Christian Loera; Dr. Christopher Ball; Emily Bartlett; James Razor; Matthew Burns; Ying Pei                                                                                                                                                                                                                                                                                                                                                                                                                                                                                                                                                                           |
| EPI_ISL_3275076, EPI_ISL_3275091, EPI_ISL_3275092, EPI_ISL_3275107, EPI_ISL_3275112, EPI_ISL_3275117, EPI_ISL_3275124                                                                                                                                                                                                                                                                                                                                                                                                                                                                                                                                                                                                                                                                                                                                                                                                                                                                                                                                                                                                                                                                                                                                                                                    |                                                                                                     |                                                                                              |                                                                                                                                                                                                                                                                                                                                                                                                                                                                                                                                                                                                                                                                                                              |
| see above                                                                                                                                                                                                                                                                                                                                                                                                                                                                                                                                                                                                                                                                                                                                                                                                                                                                                                                                                                                                                                                                                                                                                                                                                                                                                                | Idaho Bureau of Laboratories                                                                        | Center for Global Health, University of New Mexico Health Sciences Center                    | Christopher Ball; Darrell Dinwiddie; Daryl Domman; Kurt Schwalm; Matthew Burns; Robert Voermans; Valerie Morley                                                                                                                                                                                                                                                                                                                                                                                                                                                                                                                                                                                              |
| EPI_ISL_1627316, EPI_ISL_2140153, EPI_ISL_3217194, EPI_ISL_3217211, EPI_ISL_3217233, EPI_ISL_3217236, EPI_ISL_3217246, EPI_ISL_3242933, EPI_ISL_3242935, EPI_ISL_3242943, EPI_ISL_3242946, EPI_ISL_3242950, EPI_ISL_3242959, EPI_ISL_3242969, EPI_ISL_3242985, EPI_ISL_3242988, EPI_ISL_3242995, EPI_ISL_3242997, EPI_ISL_3242999                                                                                                                                                                                                                                                                                                                                                                                                                                                                                                                                                                                                                                                                                                                                                                                                                                                                                                                                                                        |                                                                                                     |                                                                                              |                                                                                                                                                                                                                                                                                                                                                                                                                                                                                                                                                                                                                                                                                                              |
| see above                                                                                                                                                                                                                                                                                                                                                                                                                                                                                                                                                                                                                                                                                                                                                                                                                                                                                                                                                                                                                                                                                                                                                                                                                                                                                                | Idaho Bureau of Laboratories                                                                        | Idaho Bureau of Laboratories                                                                 | "R. Beukelman; Aimee Ceniseros; Christian Loera; Christopher Ball; Christopher Ball"; Matthew Charles Burns; R. Beukelman; Robert L. Voermans                                                                                                                                                                                                                                                                                                                                                                                                                                                                                                                                                                |
| EPI_ISL_1225750, EPI_ISL_1494258, EPI_ISL_1494427, EPI_ISL_1652322, EPI_ISL_1652448, EPI_ISL_3254901, EPI_ISL_3254909, EPI_ISL_3254910, EPI_ISL_3254922, EPI_ISL_3254923, EPI_ISL_3254934, EPI_ISL_3254939, EPI_ISL_3254941                                                                                                                                                                                                                                                                                                                                                                                                                                                                                                                                                                                                                                                                                                                                                                                                                                                                                                                                                                                                                                                                              |                                                                                                     |                                                                                              |                                                                                                                                                                                                                                                                                                                                                                                                                                                                                                                                                                                                                                                                                                              |
| see above                                                                                                                                                                                                                                                                                                                                                                                                                                                                                                                                                                                                                                                                                                                                                                                                                                                                                                                                                                                                                                                                                                                                                                                                                                                                                                | Illinois Department of Public Health                                                                | Gagnon Lab, Southern Illinois University                                                     | Keith Gagnon                                                                                                                                                                                                                                                                                                                                                                                                                                                                                                                                                                                                                                                                                                 |
| EPI_ISL_1809503, EPI_ISL_1809581, EPI_ISL_3231974, EPI_ISL_3231976, EPI_ISL_3231977, EPI_ISL_3232081, EPI_ISL_3232092, EPI_ISL_3232094, EPI_ISL_3232096                                                                                                                                                                                                                                                                                                                                                                                                                                                                                                                                                                                                                                                                                                                                                                                                                                                                                                                                                                                                                                                                                                                                                  |                                                                                                     |                                                                                              |                                                                                                                                                                                                                                                                                                                                                                                                                                                                                                                                                                                                                                                                                                              |
| see above                                                                                                                                                                                                                                                                                                                                                                                                                                                                                                                                                                                                                                                                                                                                                                                                                                                                                                                                                                                                                                                                                                                                                                                                                                                                                                | Illinois Department of Public Health                                                                | Illinois Department of Public Health - Chicago Lab                                           | Ira Heimler; Joel Price; Vineet K. Dhiman                                                                                                                                                                                                                                                                                                                                                                                                                                                                                                                                                                                                                                                                    |
| EPI_ISL_1478914, EPI_ISL_1732560, EPI_ISL_1789191, EPI_ISL_3218926, EPI_ISL_3218946, EPI_ISL_3218947, EPI_ISL_3218952, EPI_ISL_3218960, EPI_ISL_3219010, EPI_ISL_3219018, EPI_ISL_3219059, EPI_ISL_3219071, EPI_ISL_3219092                                                                                                                                                                                                                                                                                                                                                                                                                                                                                                                                                                                                                                                                                                                                                                                                                                                                                                                                                                                                                                                                              |                                                                                                     |                                                                                              |                                                                                                                                                                                                                                                                                                                                                                                                                                                                                                                                                                                                                                                                                                              |
| see above                                                                                                                                                                                                                                                                                                                                                                                                                                                                                                                                                                                                                                                                                                                                                                                                                                                                                                                                                                                                                                                                                                                                                                                                                                                                                                | Illinois Department of Public Health - Springfield Lab                                              | Illinois Department of Public Health - Springfield Lab                                       | Bryan Sim; Gordon McCall; Marshall Smock                                                                                                                                                                                                                                                                                                                                                                                                                                                                                                                                                                                                                                                                     |
| EPI_ISL_2155650                                                                                                                                                                                                                                                                                                                                                                                                                                                                                                                                                                                                                                                                                                                                                                                                                                                                                                                                                                                                                                                                                                                                                                                                                                                                                          | Ilocos Training and Regional Medical Center                                                         | Philippine Genome Center                                                                     | Alethea R. de Guzman; Anna Ong-Lim; Arianne A. Zamora; Asia Louisa U. Chong; Benedict A. Maralit; Candice Francheska B. Tambaon; Carlo M. Lapid; Celia Carlos; Devon Ray Pacial; Edsel Maurice Salvaña; El King D. Morado; Eva Maria Cutiongco-de la Paz; Francis A. Tablizo; Irish Coleen A. Asin; Jaime C. Montoya; Jan Michael C. Yap; Jo-Hannah S. Llamas; John Q. Wong; Joshua Gregor A. Dizon; Juan Antonio R. Magalang; Karol Sophia Agape R. Padilla; Kenneth M. Kim; Kris P. Punayan; Marc Edsel C. Ayes; Marc Jerrone R. Castro; Maria Rosario Singh-Vergeire and Cynthia P. Saloma; Maria Sofia L. Yangzon; Marissa Alejandria; Razel Nikka M. Hao; Rianna Patricia S. Cruz; Sheila Mae M. Araiza |
| EPI_ISL_1464617,<br>EPI_ISL_1810891                                                                                                                                                                                                                                                                                                                                                                                                                                                                                                                                                                                                                                                                                                                                                                                                                                                                                                                                                                                                                                                                                                                                                                                                                                                                      | Imeda Hospital<br>INDRE                                                                             | Imelda Hospital<br>Instituto Nacional de Medicina Genomica                                   | Dagmar Obbels; Hanne Valgaeren; Johan Frans<br>Cedro-Tanda A; Garcia-Cardenas FJ; Gisela Barrera-Badillo; Gonzalez-Barrera D; Gonzalez-Woge MA; Herrera-Montalvo LA.; Hidalgo-Miranda A.; Irma Lopez-Martinez; Jose Ernesto Ramirez González; Mendoza-Vargas A; Munguia-Garza P; Rangel-DeLeon D; Reyes-Grajeda JP                                                                                                                                                                                                                                                                                                                                                                                           |
| EPI_ISL_413523                                                                                                                                                                                                                                                                                                                                                                                                                                                                                                                                                                                                                                                                                                                                                                                                                                                                                                                                                                                                                                                                                                                                                                                                                                                                                           | Indian Council of Medical Research-National Institute of Virology                                   | National Influenza Center, Indian Council of Medical Research-National Institute of Virology | NIV; Potdar; Pune; Varsha on behalf of National Influenza Centre                                                                                                                                                                                                                                                                                                                                                                                                                                                                                                                                                                                                                                             |
| EPI_ISL_3275381,<br>EPI_ISL_3275387,<br>EPI_ISL_3275389,<br>EPI_ISL_5051606,<br>EPI_ISL_5051613,<br>EPI_ISL_5985354                                                                                                                                                                                                                                                                                                                                                                                                                                                                                                                                                                                                                                                                                                                                                                                                                                                                                                                                                                                                                                                                                                                                                                                      | Indira Gandhi Memorial Hospital                                                                     | Indira Gandhi Memorial Hospital                                                              | D. Fathmath Nazia Rafeeq; Dr. Ibrahim Afzal; Dr. Milza Abdul Muhsin; Mr. Ibrahim Nishan Ahmed; Ms. Aishath Shuhudha; Ms. Aminath Nazfa; Ms. Aminath Shazleena Abdul Rahman; Ms. Fathimath Zimna                                                                                                                                                                                                                                                                                                                                                                                                                                                                                                              |
| EPI_ISL_1785074                                                                                                                                                                                                                                                                                                                                                                                                                                                                                                                                                                                                                                                                                                                                                                                                                                                                                                                                                                                                                                                                                                                                                                                                                                                                                          | Infectious Agents & Hygiene                                                                         | GIMAP and Virpath teams-CIRI                                                                 | Andrés Pizzorno; Bruno Pozzetto; Julien Fouret; Manuel Rosa-Calatrava; Olivier Terrier; Stéphane Paul; Sylvie Pillet; Thomas Bourlet; Thomas Julien; Victoria Dulière                                                                                                                                                                                                                                                                                                                                                                                                                                                                                                                                        |
| EPI_ISL_413518,<br>EPI_ISL_413519,<br>EPI_ISL_413520                                                                                                                                                                                                                                                                                                                                                                                                                                                                                                                                                                                                                                                                                                                                                                                                                                                                                                                                                                                                                                                                                                                                                                                                                                                     | Infectious Disease Control Center, Center for Disease Control and Prevention of PLA                 | Infectious Disease Control Center, Center for Disease Control and Prevention of PLA          | Li; Li, J.; Li, L.; Li, Z.; P. and Li, P.; Qiu, S.; Song, H.                                                                                                                                                                                                                                                                                                                                                                                                                                                                                                                                                                                                                                                 |
| EPI_ISL_1513919, EPI_ISL_1513087, EPI_ISL_1692161, EPI_ISL_1693351, EPI_ISL_1693573, EPI_ISL_1693596, EPI_ISL_1693757, EPI_ISL_1694024, EPI_ISL_1694086, EPI_ISL_1694378, EPI_ISL_1732687, EPI_ISL_1732727, EPI_ISL_1732879, EPI_ISL_1733104, EPI_ISL_1803159, EPI_ISL_2013155, EPI_ISL_2013485, EPI_ISL_2013511, EPI_ISL_2014569, EPI_ISL_2087071, EPI_ISL_2087247, EPI_ISL_2087367, EPI_ISL_2087499, EPI_ISL_2088472, EPI_ISL_2186680, EPI_ISL_2186684                                                                                                                                                                                                                                                                                                                                                                                                                                                                                                                                                                                                                                                                                                                                                                                                                                                 |                                                                                                     |                                                                                              |                                                                                                                                                                                                                                                                                                                                                                                                                                                                                                                                                                                                                                                                                                              |

|                                                                                                     |                                                                                                                                                                                |                                                                                                                                                |                                                                                                                                                                                                                                                                                                                                                                                                                                                |
|-----------------------------------------------------------------------------------------------------|--------------------------------------------------------------------------------------------------------------------------------------------------------------------------------|------------------------------------------------------------------------------------------------------------------------------------------------|------------------------------------------------------------------------------------------------------------------------------------------------------------------------------------------------------------------------------------------------------------------------------------------------------------------------------------------------------------------------------------------------------------------------------------------------|
| see above                                                                                           | Infinity Biologix                                                                                                                                                              | Centers for Disease Control and Prevention Division of Viral Diseases, Pathogen Discovery                                                      | Adrian Paskey; Benjamin Rambo-Martin; Chirayu Goswami; Christian Bixby; Christopher Gulvick; Clinton R. Paden; Dakota Howard; Darlene Wagner; Dhvani Batra; Duncan MacCannell; Jason Caravas; Jonathan Schultz; Kara Moser; Matthew Schmerer; Peter W. Cook; Robin Grimwood; Russ Hager; Scott Simmons; Shatavia Morrison; Yihe Wang; Yvette Unoarumhi                                                                                         |
| EPI_ISL_3229992                                                                                     | Innlandet Hospital Trust, Division Lillehammer, Department for Medical Microbiology                                                                                            | Norwegian Institute of Public Health, Department of Virology                                                                                   | Atiya R Ali; Debec Nadia; Engebretsen Serina Beate; Garcia Llorente Ignacio; Hilde Elshaug; Hilde Volla; Jon Bråte; Kamilla Heddeland Instefjord; Karoline Bragstad; Kathrine Stene-Johansen; Line Victoria Moen; Marie Paulsen Madsen; Olav Hungnes; Pedersen Benedikte Nevjen; Rasmus Riis Kopperud                                                                                                                                          |
| EPI_ISL_677878                                                                                      | Innovative Genomics Institute, UC Berkeley                                                                                                                                     | Innovative Genomics Institute, UC Berkeley                                                                                                     | Haridha Shivram; Justin Choi; Liana Lareau; Phil Frankino; Shana McDevitt; Stacia Wyman                                                                                                                                                                                                                                                                                                                                                        |
| EPI_ISL_2691162, EPI_ISL_2691166                                                                    | Instituto Adolfo Lutz Central                                                                                                                                                  | Instituto Adolfo Lutz, Interdisciplinary Procedures Center, Strategic Laboratory                                                               | Caio Vinicius Dias Lopes; Claudia Regina Gonçalves; Claudio Tavares Sacchi; Erica Valessa Ramos Gomes; Karoline Rodrigues Campos; Leonardo Jose Tadeu de Araujo                                                                                                                                                                                                                                                                                |
| EPI_ISL_418210, EPI_ISL_418213, EPI_ISL_418216                                                      | Institut Pasteur Dakar                                                                                                                                                         | Institut Pasteur de Dakar                                                                                                                      | Amadou Alpha Sali; Ndongo Dia; Ousmane Faye                                                                                                                                                                                                                                                                                                                                                                                                    |
| EPI_ISL_498243                                                                                      | Institut Pasteur de Dakar                                                                                                                                                      | Institut Pasteur de Dakar                                                                                                                      | Amadou Alpha Sali.; Mamadou Diop; Mamadou Malaid Jallow; Marie Henriette Dior Ndione; Moussa Moise Diagne; Ndongo Dia; Ousmane Faye; Safietou Sankhe Mbengue                                                                                                                                                                                                                                                                                   |
| EPI_ISL_416747, EPI_ISL_416748, EPI_ISL_416753, EPI_ISL_416756, EPI_ISL_416758                      | Institut des Agents Infectieux (IAI) Hospices Civils de Lyon                                                                                                                   | CNR Virus des Infections Respiratoires - France SUD                                                                                            | Alexandre; Antonin; Bal; Bouscambert-Duchamp; Brengel-Pesce; Bruno.; Cheynet; Destras; Florence; Gaynard; Gregory; Josset; Karen; Laurence; Lina; Martine; Maude; Morfin-Sherpa; Valette; Valérie                                                                                                                                                                                                                                              |
| EPI_ISL_417336, EPI_ISL_417337, EPI_ISL_418420, EPI_ISL_418421, EPI_ISL_418425, EPI_ISL_418430      | Institut des Agents Infectieux (IAI), Hospices Civils de Lyon                                                                                                                  | CNR Virus des Infections Respiratoires - France SUD                                                                                            | Alexandre Gaynard; Antonin Bal; Bruno Lina; Carine Moustaud; Florence Morfin-Sherpa; Gregory Destras; Gwendolyne Burfin; Laurence Josset; Martine Valette; Maude Bouscambert-Duchamp; Raphaëlle Lamy; Solenne Brun                                                                                                                                                                                                                             |
| EPI_ISL_1811287, EPI_ISL_2035977                                                                    | Institute for Infectious Diseases<br>Institute for Infectious Diseases, University of Bern, Switzerland                                                                        | Institute for Infectious Diseases, University of Bern, Switzerland                                                                             | Alban Ramette; Christian Baumann; Cora Sägesser; Franziska Suter-Riniker; Miguel A Terrazos Miani; Pascal Bittel; Peter Keller; Stefan Neuwander; Stephen L Leib<br>Alban Ramette; Christian Baumann; Cora Sägesser; Franziska Suter-Riniker; Miguel A Terrazos Miani; Pascal Bittel; Peter Keller; Stefan Neuwander; Stephen L Leib                                                                                                           |
| EPI_ISL_1055264, EPI_ISL_1673287, EPI_ISL_3247770                                                   | Institute for Medical Research, Infectious Disease Research Centre, National Institutes of Health, Ministry of Health Malaysia                                                 | Institute for Medical Research, Infectious Disease Research Centre, National Institutes of Health, Ministry of Health Malaysia                 | Anasir Mi; Azizan MA; Kamel K; Mohd Zawawi Z; Ramly N; Robert F; Suppiah J; Thayan R                                                                                                                                                                                                                                                                                                                                                           |
| EPI_ISL_1909184                                                                                     | Institute for Public Health of for Public Health "Dr. Andrija Štampar"                                                                                                         | Croatian Institute of Public Health                                                                                                            | Irena Tabain; Ivana Ferenčak                                                                                                                                                                                                                                                                                                                                                                                                                   |
| EPI_ISL_602497                                                                                      | Institute for Virology, University Hospital Essen                                                                                                                              | Center of Medical Microbiology, Virology, and Hospital Hygiene, University of Duesseldorf                                                      | Alexander Dilthey; Andreas Walker; Daniel Strelow; Jessica Nicolai; Jörg Timm; Klaus Pfeffer; Lisanna Hülse; Malte Kohns Vasconcelos; Maximilian Damagnez; Nadine Lübke; Olympia E. Anastasiou; Tobias Wienemann; Torsten Houwaart; Ulf Dittmer                                                                                                                                                                                                |
| EPI_ISL_418988                                                                                      | Institute information KU Leuven, Clinical and Epidemiological Virology                                                                                                         | Institute information KU Leuven, Clinical and Epidemiological Virology                                                                         | Bert Vanmechelen; Joan Marti-Carreras; Piet Maes; Tony Wawina                                                                                                                                                                                                                                                                                                                                                                                  |
| EPI_ISL_1941277                                                                                     | Institute of Medical Microbiology and Hospital Hygiene                                                                                                                         | Institute of Medical Microbiology and Hospital Hygiene                                                                                         | Aļjoscha Tersteegen; Prof. Dr. Achim Kaasch                                                                                                                                                                                                                                                                                                                                                                                                    |
| EPI_ISL_877424, EPI_ISL_1669660, EPI_ISL_1989972, EPI_ISL_2007195, EPI_ISL_5160156, EPI_ISL_5160296 | Institute of Microbiology and Immunology, Faculty of Medicine, University of Ljubljana                                                                                         | Institute of Microbiology and Immunology, Faculty of Medicine, University of Ljubljana                                                         | Alen Suljić; Andraž Celar; Domen Lazar; Dominika Šturm; Doroteja Vljaj; Mario Poljak; Matic Brvar; Miša Korva; Patricija Pozvek; Samo Zakotnik; Tatjana Avšič - Županc; Tatjana Avšič - Županc; Tina Gabrovšek; Tina Živič; Tomaž Mark Zorec; Špela Pleh                                                                                                                                                                                       |
| EPI_ISL_525430                                                                                      | Institute of Microbiology, Universidad San Francisco de Quito                                                                                                                  | Institute of Microbiology, Universidad San Francisco de Quito                                                                                  | Belén Prado-Vivar; Bernardo Gutiérrez; Gabriel Trueba; Juan José Guadalupe; Michelle Grunauer; Monica Becerra-Wong; Patricio Rojas-Silva; Paúl Cárdenas; Sully Márquez; Verónica Barragán                                                                                                                                                                                                                                                      |
| EPI_ISL_1465456, EPI_ISL_1675651                                                                    | Institute of Molecular and Translational Medicine / Laboratory of Experimental Medicine, Faculty of Medicine and Dentistry, Palacky University and University Hospital Olomouc | Institute of Molecular and Translational Medicine / Laboratory of Experimental Medicine, Faculty of Medicine and Dentistry, Palacky University | Barbora Blumová; Hana Jaworek; Marián Hajdúch; Rastislav Slavkovský; Tomáš Pospíšil; Tomáš Pospíšil; Vladimíra Koudeláková                                                                                                                                                                                                                                                                                                                     |
| EPI_ISL_402123, EPI_ISL_403928, EPI_ISL_403930, EPI_ISL_403931                                      | Institute of Pathogen Biology, Chinese Academy of Medical Sciences & Peking Union Medical College                                                                              | Institute of Pathogen Biology, Chinese Academy of Medical Sciences & Peking Union Medical College                                              | Chao Wu; Jianwei Wang; Lili Ren; Qi Jin; Yiwei Liu; Zhiqiang Wu; Zichun Xiang                                                                                                                                                                                                                                                                                                                                                                  |
| EPI_ISL_3242401, EPI_ISL_3243314, EPI_ISL_3243326                                                   | Institute of Preventive Medicine                                                                                                                                               | CDFD                                                                                                                                           | Ashwin Dalal; Asmita Gupta; Divya Vashisht; Murali Bashyam; Nagamani Kammili; Reelina Basu; Vinay Donipadi                                                                                                                                                                                                                                                                                                                                     |
| EPI_ISL_1904497                                                                                     | Institute of Public Health Dubrovnik-Neretva County                                                                                                                            | Croatian Institute of Public Health                                                                                                            | Irena Tabain; Ivana Ferenčak                                                                                                                                                                                                                                                                                                                                                                                                                   |
| EPI_ISL_3277339, EPI_ISL_3277357, EPI_ISL_3277359, EPI_ISL_3277369                                  | Institute of Virology Department of Hygiene, Microbiology and Public Health at Innsbruck Medical University                                                                    | Institute of Virology Department of Hygiene, Microbiology and Public Health at Innsbruck Medical University                                    | Andre Volland; Annika Roessler; Barbara Falkensammer; David Bante; Dorothee von Laer; Heribert Stoiber; Janine Kimpel; Lisa Pipperger; Lydia Riepler; Wegene Borena                                                                                                                                                                                                                                                                            |
| EPI_ISL_3277415, EPI_ISL_3277424, EPI_ISL_3277449, EPI_ISL_3277467                                  | Institute of Virology, Biomedical Research Center of the Slovak Academy of Sciences, Bratislava                                                                                | Faculty of Mathematics, Physics and Informatics, Comenius University, Bratislava                                                               | Boris Klempa; Brona Brejova; Jozef Nosek; Juraj Kopacek; Kristína Borsova; Lubomira Lukackikova; Martina Lickova; Martina Nebohacova; Monika Slavikova; Sabina Fumacova Havlikova; Tomas Vinar; Veronika Vanova; Viktoria Cabanova                                                                                                                                                                                                             |
| EPI_ISL_1239414, EPI_ISL_1492468, EPI_ISL_1547876                                                   | Institute of Virology, Biomedical Research Center of the Slovak Academy of Sciences, Bratislava                                                                                | Faculty of Natural Sciences, Comenius University, Bratislava                                                                                   | Boris Klempa; Brona Brejova; Broňa Brejová; Jozef Nosek; Juraj Kopacek; Juraj Kopáček; Kristína Borsova; Kristína Boršová; Lubomira Lukackikova; Martina Lickova; Martina Ličková; Martina Nebohacova; Martina Neboháčová; Monika Slavikova; Monika Sláviková; Sabina Fumacova Havlikova; Sabina Fumačová Havlíková; Tomas Vinar; Tomáš Vinař; Viktoria Cabanova; Viktoria Hodorova; Viktória Hodorová; Viktória Cabanová; Lubomíra Lukáčiková |
| EPI_ISL_417877, EPI_ISL_417878, EPI_ISL_417879                                                      | Institute of Virology, Biomedical Research Center of the Slovak Academy of Sciences, Bratislava; Public Health Authority of the Slovak Republic, Bratislava                    | Institute of Virology, Biomedical Research Center of the Slovak Academy of Sciences, Bratislava; Comenius University Science Park, Bratislava  | Boris Klempa; Diana Rusňáková; Edita Staroňová; Elena Tichá; Jaroslav Budíš; Juraj Kopáček; Juraj Kočí; Martina Ličková; Miroslav Böhmer; Monika Slávikova; Sabina Fumačová Havlíková; Tomáš Szemeš; Werner Krampfl                                                                                                                                                                                                                            |
| EPI_ISL_3200842, EPI_ISL_3200851                                                                    | Institute of Virology, Medical Center, University of Freiburg, Freiburg, Germany                                                                                               | Institute of Virology, Clinical Virus Genomics, Medical Center, University of Freiburg, Freiburg, Germany                                      | Hajo Grundmann; Jonas Fuchs; Lena Jaki; Lisa Kern; Marcus Panning; Sandra Reuter                                                                                                                                                                                                                                                                                                                                                               |
| EPI_ISL_2003151                                                                                     | Instituto Adolfo Lutz - Regional de Bauru                                                                                                                                      | Instituto Adolfo Lutz, Interdisciplinary Procedures Center, Strategic Laboratory                                                               | Caio Vinicius Dias Lopes; Claudia Regina Gonçalves; Claudio Tavares Sacchi; Erica Valessa Ramos Gomes; Karoline Rodrigues Campos; Leonardo Jose Tadeu de Araujo                                                                                                                                                                                                                                                                                |
| EPI_ISL_3259695, EPI_ISL_3259706, EPI_ISL_4877319, EPI_ISL_6840842                                  | Instituto Adolfo Lutz - Regional de Campinas                                                                                                                                   | Instituto Adolfo Lutz, Interdisciplinary Procedures Center, Strategic Laboratory                                                               | Ariadne Ferreira Amarante; Caio Vinicius Dias Lopes; Claudia Regina Gonçalves; Claudio Tavares Sacchi; Erica Valessa Ramos Gomes; Karoline Rodrigues Campos; Leonardo Tadeu de Araujo; Marlon Benedito Nascimento Santos; Marlon Benedito Nascimento Santos                                                                                                                                                                                    |
| EPI_ISL_1821226, EPI_ISL_1821227, EPI_ISL_1821244, EPI_ISL_3717840                                  | Instituto Adolfo Lutz - Regional de Marília                                                                                                                                    | Instituto Adolfo Lutz, Interdisciplinary Procedures Center, Strategic Laboratory                                                               | Ariadne Ferreira Amarante; Caio Vinicius Dias Lopes; Claudia Regina Gonçalves; Claudio Tavares Sacchi; Erica Valessa Ramos Gomes; Karoline Rodrigues Campos; Leonardo Jose Tadeu de Araujo; Leonardo Tadeu de Araujo; Marlon Benedito Nascimento Santos                                                                                                                                                                                        |

|                                                                                                                                                                                                                                                                            |                                                                                  |                                                                                                                                                                                                                                                                                       |                                                                                                                                                                                                                                                                                                                                                                                                                                                                                                                                                                                                                                                                                                                                                                                                                                                                                                                                                                                                                                                                                                                                                                                                                                                                                                                                                                                                                                                                                                                                                                                                                                                                                                                                                                                                                                                               |
|----------------------------------------------------------------------------------------------------------------------------------------------------------------------------------------------------------------------------------------------------------------------------|----------------------------------------------------------------------------------|---------------------------------------------------------------------------------------------------------------------------------------------------------------------------------------------------------------------------------------------------------------------------------------|---------------------------------------------------------------------------------------------------------------------------------------------------------------------------------------------------------------------------------------------------------------------------------------------------------------------------------------------------------------------------------------------------------------------------------------------------------------------------------------------------------------------------------------------------------------------------------------------------------------------------------------------------------------------------------------------------------------------------------------------------------------------------------------------------------------------------------------------------------------------------------------------------------------------------------------------------------------------------------------------------------------------------------------------------------------------------------------------------------------------------------------------------------------------------------------------------------------------------------------------------------------------------------------------------------------------------------------------------------------------------------------------------------------------------------------------------------------------------------------------------------------------------------------------------------------------------------------------------------------------------------------------------------------------------------------------------------------------------------------------------------------------------------------------------------------------------------------------------------------|
| EPI_ISL_4877338,<br>EPI_ISL_6854920<br>EPI_ISL_6840457                                                                                                                                                                                                                     | Instituto Adolfo Lutz - Regional de Presidente Prudente                          | Instituto Adolfo Lutz,<br>Interdisciplinary Procedures<br>Center, Strategic Laboratory                                                                                                                                                                                                | Ariadne Ferreira Amarante; Caio Vinicius Dias Lopes; Claudia Regina Gonçalves; Claudio Tavares Sacchi; Karoline Rodrigues Campos; Marlon Benedito Nascimento Santos                                                                                                                                                                                                                                                                                                                                                                                                                                                                                                                                                                                                                                                                                                                                                                                                                                                                                                                                                                                                                                                                                                                                                                                                                                                                                                                                                                                                                                                                                                                                                                                                                                                                                           |
| EPI_ISL_1731581, EPI_ISL_1821250, EPI_ISL_1821259, EPI_ISL_1821265, EPI_ISL_5924198, EPI_ISL_5924208, EPI_ISL_5924210<br>see above                                                                                                                                         | Instituto Adolfo Lutz - Regional de Ribeirão Preto                               | Instituto Adolfo Lutz,<br>Interdisciplinary Procedures<br>Center, Strategic Laboratory                                                                                                                                                                                                | Caio Vinicius Dias Lopes; Claudia Regina Gonçalves; Claudio Tavares Sacchi; Erica Valessa Ramos Gomes; Karoline Rodrigues Campos; Katia Correa de Oliveira Santos; Leonardo Jose Tadeu de Araujo; Leonardo Tadeu de Araujo; Marlon Benedito Nascimento Santos                                                                                                                                                                                                                                                                                                                                                                                                                                                                                                                                                                                                                                                                                                                                                                                                                                                                                                                                                                                                                                                                                                                                                                                                                                                                                                                                                                                                                                                                                                                                                                                                 |
| EPI_ISL_5924182                                                                                                                                                                                                                                                            | Instituto Adolfo Lutz - Regional de Santos                                       | Instituto Adolfo Lutz,<br>Interdisciplinary Procedures<br>Center, Strategic Laboratory                                                                                                                                                                                                | Caio Vinicius Dias Lopes; Claudia Regina Gonçalves; Claudio Tavares Sacchi; Karoline Rodrigues Campos; Leonardo Tadeu de Araujo; Marlon Benedito Nascimento Santos                                                                                                                                                                                                                                                                                                                                                                                                                                                                                                                                                                                                                                                                                                                                                                                                                                                                                                                                                                                                                                                                                                                                                                                                                                                                                                                                                                                                                                                                                                                                                                                                                                                                                            |
| EPI_ISL_3671887                                                                                                                                                                                                                                                            | Instituto Adolfo Lutz - Regional de Santos                                       | Instituto Adolfo Lutz,<br>Interdisciplinary Procedures<br>Center, Strategic Laboratory                                                                                                                                                                                                | Caio Vinicius Dias Lopes; Claudia Regina Gonçalves; Claudio Tavares Sacchi; Karoline Rodrigues Campos; Leonardo Tadeu de Araujo; Marlon Benedito Nascimento Santos                                                                                                                                                                                                                                                                                                                                                                                                                                                                                                                                                                                                                                                                                                                                                                                                                                                                                                                                                                                                                                                                                                                                                                                                                                                                                                                                                                                                                                                                                                                                                                                                                                                                                            |
| EPI_ISL_3259719,<br>EPI_ISL_3259722,<br>EPI_ISL_5429653,<br>EPI_ISL_6840667                                                                                                                                                                                                | Instituto Adolfo Lutz - Regional de São José do Rio Preto                        | Instituto Adolfo Lutz,<br>Interdisciplinary Procedures<br>Center, Strategic Laboratory                                                                                                                                                                                                | Ariadne Ferreira Amarante; Caio Vinicius Dias Lopes; Claudia Regina Gonçalves; Claudio Tavares Sacchi; Erica Valessa Ramos Gomes; Karoline Rodrigues Campos; Leonardo Tadeu de Araujo; Marlon Benedito Nascimento Santos; Marlon Benedito Nascimento Santos                                                                                                                                                                                                                                                                                                                                                                                                                                                                                                                                                                                                                                                                                                                                                                                                                                                                                                                                                                                                                                                                                                                                                                                                                                                                                                                                                                                                                                                                                                                                                                                                   |
| EPI_ISL_2958842,<br>EPI_ISL_3259681,<br>EPI_ISL_3545791<br>see above                                                                                                                                                                                                       | Instituto Adolfo Lutz - Regional de Sorocaba                                     | Instituto Adolfo Lutz,<br>Interdisciplinary Procedures<br>Center, Strategic Laboratory                                                                                                                                                                                                | Caio Vinicius Dias Lopes; Claudia Regina Gonçalves; Claudio Tavares Sacchi; Erica Valessa Ramos Gomes; Karoline Rodrigues Campos; Leonardo Tadeu de Araujo; Marlon Benedito Nascimento Santos                                                                                                                                                                                                                                                                                                                                                                                                                                                                                                                                                                                                                                                                                                                                                                                                                                                                                                                                                                                                                                                                                                                                                                                                                                                                                                                                                                                                                                                                                                                                                                                                                                                                 |
| EPI_ISL_1628362, EPI_ISL_1715152, EPI_ISL_1752654, EPI_ISL_2756483, EPI_ISL_3259739, EPI_ISL_3267860, EPI_ISL_3691688, EPI_ISL_4206881, EPI_ISL_4206886, EPI_ISL_4888080, EPI_ISL_5030036, EPI_ISL_6854923<br>see above                                                    | Instituto Adolfo Lutz Central                                                    | Instituto Adolfo Lutz,<br>Interdisciplinary Procedures<br>Center, Strategic Laboratory                                                                                                                                                                                                | Ariadne Ferreira Amarante; Caio Vinicius Dias Lopes; Claudia Regina Gonçalves; Claudio Tavares Sacchi; Erica Valessa Ramos Gomes; Karoline Rodrigues Campos; Katia Correa de Oliveira Santos; Leonardo Jose Tadeu de Araujo; Leonardo Tadeu de Araujo; Marlon Benedito Nascimento Santos; Marlon Benedito Nascimento Santos                                                                                                                                                                                                                                                                                                                                                                                                                                                                                                                                                                                                                                                                                                                                                                                                                                                                                                                                                                                                                                                                                                                                                                                                                                                                                                                                                                                                                                                                                                                                   |
| EPI_ISL_2790135                                                                                                                                                                                                                                                            | Instituto Nacional de Cancerología                                               | Centro de Investigación en<br>Enfermedades Infecciosas<br>(CIENI), Instituto Nacional de<br>Enfermedades Respiratorias<br>(INER)                                                                                                                                                      | Alejandra García-Gasca; Alejandra Hernández-Terán; Alejandro Sánchez-Flores; Alfredo Herrera-Estrella; Alicia Ocaña-Mondragón; Andreu Comas-García; Angel Gustavo Salas-Lais; Antonio Loza Román; Bernardo Martínez-Miguel; Blanca Taboada; Brenda Irasema Maldonado-Meza; Bruno Gomez-Gil; Carla Ivón Herrera-Najera; Carlos F. Arias; Celia Boukadida; Clara Esperanza Santacruz-Tinoco; Concepción Grajalés-Muñiz; Consorcio Mexicano de Vigilancia Genómica (COVGen-Mex). Authors (in alphabetical order); Julio Elias Alvarado-Yaah; Cristóbal Cháidez-Quiróz; Céliida Duque Molina; Céliida Martínez- Rodríguez; Daniel Fregoso-Rueda; Daniel Lira Morales; Eduardo Becerril-Vargas; Fernando Fontove-Herrera; Fidencio Mejía-Nepomuceno; Francisco Pulido; Jorge Elena Espinosa-Ayala; Gloria María Molina-Salinas; Gloria Vazquez; Hector Esteban Paz-Juárez; Hector Montoya-Fuentes; Helen Haydee Fernanda Ramírez-Plascencia; Jean Pierre González; Joel Armando Vázquez-Pérez.; Jorje Salas-Hernández; José Antonio Enciso-Moreno; José Arturo Martínez-Orozco; José Esteban Muñoz-Medina; José de Jesús Nuñez-Contreras; Juan Bautista Chale-Dzul; Julissa Enciso-Ibarra; Kathia Elizabeth Tapia-Díaz; Luis Alberto Ochoa-Carrera; Margarita Matías-Florentino; Mario Mújica-Sánchez; Marissa Pérez-García; María Guadalupe de Jesús Mireles-Rivera; Nelly Sélem-Mojica; Pavel Isa; Ricardo Ciria Merce; Ricardo Grande; Rosa María Gutiérrez Rios; Santiago Avila-Ríos; Selene Zárate; Susana Lopez; Victor Eduardo García-Arias; Victor Hugo Borja-Aburto                                                                                                                                                                                                                                                                                       |
| EPI_ISL_412972                                                                                                                                                                                                                                                             | Instituto Nacional de Enfermedades Respiratorias                                 | Instituto de Diagnostico y<br>Referencia Epidemiologicos<br>(INDRE)                                                                                                                                                                                                                   | Araiza-Rodriguez Adnan; Arias Carlos; Barrera-Badillo Gisela; Boukadida Celia; Garces-Ayala Fabiola; Hernandez-Rivas Lucia; Isa Pavel; Lopez Susana; Lopez-Martinez Irma; Martinez Arturo; Mendieta-Condado Edgar; Munoz-Medina Esteban; Ramirez-Gonzalez Ernesto; Rodriguez-Maldonado Abril; Sanchez Alejandro; Taboada Blanca; Vazquez-Perez Joel; Wong-Arambula Claudia                                                                                                                                                                                                                                                                                                                                                                                                                                                                                                                                                                                                                                                                                                                                                                                                                                                                                                                                                                                                                                                                                                                                                                                                                                                                                                                                                                                                                                                                                    |
| EPI_ISL_2490607, EPI_ISL_2490608, EPI_ISL_2648116, EPI_ISL_3268373, EPI_ISL_3268384, EPI_ISL_3268386, EPI_ISL_3268393, EPI_ISL_3268401, EPI_ISL_3268403, EPI_ISL_3268407, EPI_ISL_3268411, EPI_ISL_3268436, EPI_ISL_4496675, EPI_ISL_4888481, EPI_ISL_4888493<br>see above | Instituto Nacional de Enfermedades Respiratorias (INER)                          | Centro de Investigación en<br>Enfermedades Infecciosas<br>(CIENI), Instituto Nacional de<br>Enfermedades Respiratorias<br>(INER)                                                                                                                                                      | ; Alejandra García-Gasca; Alejandra Hernández-Terán; Alejandro Sánchez-Flores; Alfredo Herrera-Estrella; Alicia Ocaña-Mondragón; Andreu Comas-García; Angel Gustavo Salas-Lais; Antonio Loza Román; Bernardo Martínez-Miguel; Blanca Taboada; Brenda Irasema Maldonado-Meza; Bruno Gomez-Gil; Bruno Gomez-Gil; Carla Ivón Herrera-Najera; Carlos F. Arias; Celia Boukadida; Clara Esperanza Santacruz-Tinoco; Concepción Grajalés-Muñiz; Consorcio Mexicano de Vigilancia Genómica (COVGen-Mex). Authors (in alphabetical order); Julio Elias Alvarado-Yaah; Cristóbal Cháidez-Quiróz; Céliida Duque Molina; Céliida Martínez- Rodríguez; Céliida Fregoso-Rueda; Daniel Fregoso-Rueda; Daniel Lira Morales; Eduardo Becerril-Vargas; Eduardo Rivera-Martínez; Fernando Fontove-Herrera; Fidencio Mejía-Nepomuceno; Francisco Pulido; Gabriel Chavira-Trujillo; Gloria Elena Espinosa-Ayala; Gloria María Molina-Salinas; Gloria Vazquez; Hector Esteban Paz-Juárez; Hector Montoya-Fuentes; Helen Haydee Fernanda Ramírez-Plascencia; Jean Pierre González; Jesús Hernández; Joel Armando Vázquez-Pérez.; Joel Armando Vázquez-Pérez.; Jorje Salas-Hernández; José Antonio Enciso-Moreno; José Arturo Martínez-Orozco; José Esteban Muñoz-Medina; José de Jesús Nuñez-Contreras; Juan Bautista Chale-Dzul; Julissa Enciso-Ibarra; Kathia Elizabeth Tapia-Díaz; Luis Alberto Ochoa-Carrera; Margarita Matías-Florentino; Mario Mújica-Sánchez; Marissa Pérez-García; María Eugenia Jiménez-Corona; María Guadalupe Santiago-Mauricio; María Guadalupe de Jesús Mireles-Rivera; Nelly Sélem-Mojica; Pavel Isa; Ricardo Ciria Merce; Ricardo Grande; Rosa María Gutiérrez Rios; Rosario Vazquez-Larios; Santiago Avila-Ríos; Selene Zárate; Susana Lopez; Verónica Mata-Haro; Victor Eduardo García-Arias; Victor Eduardo García-Arias; Victor Hugo Borja-Aburto |
| EPI_ISL_837630,<br>EPI_ISL_837797                                                                                                                                                                                                                                          | Instituto Nacional de Enfermedades Respiratorias (INER)                          | Instituto Nacional de<br>Enfermedades Respiratorias<br>(INER)                                                                                                                                                                                                                         | Alejandra Hernández-Terán; Alma Rincón-Rubio; Celia Boukadida; Edgar Sevilla-Reyes; Eduardo Becerril-Vargas; Fidencio Mejía-Nepomuceno; Hector Esteban Paz-Juárez; Joel Armando Vázquez-Pérez; Jorge Salas-Hernández; José Arturo Martínez-Orozco; Margarita Matías-Florentino; Mario Mújica-Sánchez; Olivia Briceño; Santiago Avila-Ríos                                                                                                                                                                                                                                                                                                                                                                                                                                                                                                                                                                                                                                                                                                                                                                                                                                                                                                                                                                                                                                                                                                                                                                                                                                                                                                                                                                                                                                                                                                                     |
| EPI_ISL_4882158,<br>EPI_ISL_6328249,<br>EPI_ISL_6773742,<br>EPI_ISL_6773743,<br>EPI_ISL_6773757                                                                                                                                                                            | Instituto Nacional de Enfermedades Respiratorias (INER)                          | Laboratorio de Biología<br>Molecular de Enfermedades<br>Emergentes y EPOC, Instituto<br>Nacional de Enfermedades<br>Respiratorias (INER)                                                                                                                                              | Alejandra García-Gasca; Alejandra Hernández-Terán; Alejandro Sánchez-Flores; Alfredo Herrera-Estrella; Alicia Ocaña-Mondragón; Andreu Comas-García; Angel Gustavo Salas-Lais; Antonio Loza Román; Bernardo Martínez-Miguel; Blanca Taboada; Brenda Irasema Maldonado-Meza; Bruno Gomez-Gil; Bruno Gomez-Gil; Carla Ivón Herrera-Najera; Carlos F. Arias; Celia Boukadida; Clara Esperanza Santacruz-Tinoco; Concepción Grajalés-Muñiz; Consorcio Mexicano de Vigilancia Genómica (COVGen-Mex). Authors (in alphabetical order); Julio Elias Alvarado-Yaah; Cristóbal Cháidez-Quiróz; Céliida Duque Molina; Céliida Martínez- Rodríguez; Céliida Fregoso-Rueda; Daniel Fregoso-Rueda; Daniel Lira Morales; Eduardo Becerril-Vargas; Eduardo Rivera-Martínez; Fernando Fontove-Herrera; Fidencio Mejía-Nepomuceno; Francisco Pulido; Gabriel Chavira-Trujillo; Gloria Elena Espinosa-Ayala; Gloria María Molina-Salinas; Gloria Vazquez; Hector Esteban Paz-Juárez; Hector Montoya-Fuentes; Helen Haydee Fernanda Ramírez-Plascencia; Jean Pierre González; Jesús Hernández; Joel Armando Vázquez-Pérez.; Jorje Salas-Hernández; José Antonio Enciso-Moreno; José Arturo Martínez-Orozco; José Esteban Muñoz-Medina; José de Jesús Nuñez-Contreras; Juan Bautista Chale-Dzul; Julissa Enciso-Ibarra; Kathia Elizabeth Tapia-Díaz; Luis Alberto Ochoa-Carrera; Margarita Matías-Flore; Margarita Matías-Florentino; Mario Mújica-Sánchez; Marissa Perez-García; María Eugenia Jiménez-Corona; María Guadalupe Santiago-Mauricio; María Guadalupe de Jesús Mireles-Rivera; Nelly Sélem-Mojica; Pavel Isa; Ricardo Ciria Merce; Ricardo Grande; Rosa María Gutiérrez Rios; Rosario Vazquez-Larios; Santiago Avila-Ríos; Selene Zárate; Susana Lopez; Verónica Mata-Haro; Victor Eduardo García-Arias; Victor Hugo Borja-Aburto                                     |
| EPI_ISL_1824420                                                                                                                                                                                                                                                            | Instituto Nacional de Medicina Genómica                                          | Centro de Investigación en<br>Enfermedades Infecciosas<br>(CIENI), Instituto Nacional de<br>Enfermedades Respiratorias<br>(INER)                                                                                                                                                      | Arriaga-Canon C; Avila-Rios S; Boukadida C; Cedro-Tanda A; Herrera-Montalvo LA; Hidalgo-Miranda A; Matias-Florentino M; Mendoza-Vargas A; Perez-Garcia M; Reyes-Grajeda JP; Reyes-Teran G                                                                                                                                                                                                                                                                                                                                                                                                                                                                                                                                                                                                                                                                                                                                                                                                                                                                                                                                                                                                                                                                                                                                                                                                                                                                                                                                                                                                                                                                                                                                                                                                                                                                     |
| EPI_ISL_1406738                                                                                                                                                                                                                                                            | Instituto Nacional de Medicina Genómica                                          | Instituto Nacional de<br>Enfermedades Respiratorias<br>(INER), Centro de Investigación<br>en Enfermedades Infecciosas<br>(CIENI)                                                                                                                                                      | Arriaga-Canon C; Avila-Rios S; Boukadida C; Cedro-Tanda A; Herrera-Montalvo LA; Hidalgo-Miranda A; Matias-Florentino M; Mendoza-Vargas A; Reyes-Grajeda JP; Reyes-Teran G                                                                                                                                                                                                                                                                                                                                                                                                                                                                                                                                                                                                                                                                                                                                                                                                                                                                                                                                                                                                                                                                                                                                                                                                                                                                                                                                                                                                                                                                                                                                                                                                                                                                                     |
| EPI_ISL_1591539,<br>EPI_ISL_3277572<br>EPI_ISL_522981                                                                                                                                                                                                                      | Instituto Nacional de Medicina Genómica                                          | Instituto Nacional de Medicina<br>Genómica                                                                                                                                                                                                                                            | Alcaraz N; Canseco Mendez JC; Cedro-Tanda A; Escobar-Arrazola MA; García-Cardenas FJ; Gonzalez-Barrera D; Gonzalez-Woge MA; Herrera-Montalvo LA; Herrera-Montalvo LA; Hidalgo-Miranda A; Mendoza-Vargas A; Miranda-Ortiz H; Munguia-Garza P; Ramirez-Vega D; Rangel-DeLeon D; Reyes-Grajeda JP; Rosas-Escobar P                                                                                                                                                                                                                                                                                                                                                                                                                                                                                                                                                                                                                                                                                                                                                                                                                                                                                                                                                                                                                                                                                                                                                                                                                                                                                                                                                                                                                                                                                                                                               |
| EPI_ISL_3244557,<br>EPI_ISL_3244559,<br>EPI_ISL_3244575                                                                                                                                                                                                                    | Instituto Nacional de Medicina Genómica                                          | Instituto Nacional de Medicina<br>Genómica                                                                                                                                                                                                                                            | Cedro-Tanda A; Cisneros-Villanueva M; Herrera-Montalvo LA; Hidalgo-Miranda A; Hurtado-Cordova E; Mendoza-Vargas A; Peñaloza-Figueroa F; Reyes-Grajeda JP                                                                                                                                                                                                                                                                                                                                                                                                                                                                                                                                                                                                                                                                                                                                                                                                                                                                                                                                                                                                                                                                                                                                                                                                                                                                                                                                                                                                                                                                                                                                                                                                                                                                                                      |
| EPI_ISL_3387148                                                                                                                                                                                                                                                            | Instituto Nacional de Rehabilitación                                             | Centro de Investigación en<br>Enfermedades Infecciosas<br>(CIENI), Instituto Nacional de<br>Enfermedades Respiratorias<br>(INER)                                                                                                                                                      | Arturo Mondragón-Eguiluz; Celia Boukadida; Claudia Adriana Colín-Castro; Edgar Samuel Vanegas-Rodríguez; Guillermo Cerón-González; Luis Esaú López-Jácome; Margarita Matías-Florentino; María Guadalupe Martínez-Zavaleta; Noé Becerra-Lobato; Rafael Franco-Cendejas; Santiago Avila-Ríos                                                                                                                                                                                                                                                                                                                                                                                                                                                                                                                                                                                                                                                                                                                                                                                                                                                                                                                                                                                                                                                                                                                                                                                                                                                                                                                                                                                                                                                                                                                                                                    |
| EPI_ISL_447813                                                                                                                                                                                                                                                             | Instituto Nacional de Salud, Bogotá, Colombia                                    | Grupo de Investigaciones<br>Microbiológicas-UR (GIMUR),<br>Departamento de Biología,<br>Facultad de Ciencias Naturales,<br>Universidad del Rosario, Bogotá,<br>Colombia Instituto Nacional de<br>Salud, Bogotá, Colombia Icahn<br>School of Medicine at Mount<br>Sinai, New York, USA | Adriana Castillo; Alberto Paniz-Mondolfi; Ana S. Gonzalez-Reiche; Angelica Rico; Anibal A. Teherán; Carolina Florez; Carolina Hernandez; David Martínez; Emilia Mia Sordillo; Esther C. Barros; Harm van Bakel; Jesús E. Jaimes; Juan David Ramírez; Laura Vega; Lisseth Pardo; Marina Muñoz; Martha L. Ospina; Matthew M. Hernandez; Nathalia Ballesteros; Sergio Castañeda; Sergio Gomez; Viviana Simon                                                                                                                                                                                                                                                                                                                                                                                                                                                                                                                                                                                                                                                                                                                                                                                                                                                                                                                                                                                                                                                                                                                                                                                                                                                                                                                                                                                                                                                     |
| EPI_ISL_956285                                                                                                                                                                                                                                                             | Instituto Nacional de Salud- Dirección de Redes de Laboratorios de Salud Pública | Instituto Nacional de Salud-<br>Dirección de Investigación en<br>Salud Pública                                                                                                                                                                                                        | Carlos Franco-Muñoz; Diego A. Álvarez-Díaz; Diego Andrés Prada; Gerardo Santamaría; Hector Alejandro Ruiz-Moreno; Jhonattan Reales-González; Julian Naizaque; Katherine Laiton-Donato; Magdalena Wiesner; Marcela Mercado-Reyes; María T. Herrera-Sepúlveda; Martha Lucía Ospina Martínez; Mauricio Pacheco-Montealegre; Sheryll Corchuelo                                                                                                                                                                                                                                                                                                                                                                                                                                                                                                                                                                                                                                                                                                                                                                                                                                                                                                                                                                                                                                                                                                                                                                                                                                                                                                                                                                                                                                                                                                                    |
| EPI_ISL_3244540,<br>EPI_ISL_3244543,<br>EPI_ISL_3244555,<br>EPI_ISL_3244557,<br>EPI_ISL_3244559,<br>EPI_ISL_3244575                                                                                                                                                        | Instituto de Biotecnología - UNESP-Botucatu-SP                                   | Instituto de Biotecnología -<br>UNESP-Botucatu-SP                                                                                                                                                                                                                                     | Cecília Artico Banho; Cintia Bittar; Fábio Sossai Possebon; Guilherme Campos; Helena Lage Ferreira; Jorge A. Petrolí Marchesi; João Pessoa Araújo Jr.; Leila Sabrina Ullmann; Lívia Sacchetto; Maisa C. Pereira Parrá; Marília Moraes; Maurício L. Nogueira; Paula Rahal; Paulo Inacio da Costa                                                                                                                                                                                                                                                                                                                                                                                                                                                                                                                                                                                                                                                                                                                                                                                                                                                                                                                                                                                                                                                                                                                                                                                                                                                                                                                                                                                                                                                                                                                                                               |
| EPI_ISL_2835336,<br>EPI_ISL_2835368,<br>EPI_ISL_2835400,<br>EPI_ISL_2835504                                                                                                                                                                                                | Instituto de Diagnostico y Referencia Epidemiologicos (INDRE)                    | Andersen lab at Scripps<br>Research                                                                                                                                                                                                                                                   | Beatriz Olivares Flores; Dayanira Sarith Arellano Suarez; Irma Lopez Martinez; Jose Ernesto Ramirez Gonzalez; Maria Natividad Cruz Ortiz; Nervain Benjamin Contreras Gonzalez; Rita Flores Leon; SEARCH Alliance with Gisela Barrera Badillo; Tatiana Ernestina Nunez Garcia                                                                                                                                                                                                                                                                                                                                                                                                                                                                                                                                                                                                                                                                                                                                                                                                                                                                                                                                                                                                                                                                                                                                                                                                                                                                                                                                                                                                                                                                                                                                                                                  |
| EPI_ISL_1054964,<br>EPI_ISL_1168616                                                                                                                                                                                                                                        | Instituto de Diagnostico y Referencia Epidemiologicos INDRE_RNLSF                | Instituto de Diagnostico y<br>Referencia Epidemiologicos<br>(INDRE)                                                                                                                                                                                                                   | Abriel Rodríguez-Maldonado; Adnan Araiza-Rodríguez; Ariadna Medina-Benítez; Claudia Wong-Arambula; David Fragofo-Fonseca; Ernesto Ramirez-Gonzalez.; Fabiola Garces-Ayala; Gisela Barrera-Badillo; Irma Lopez-Martinez; Joaquin Quiroz-Mercado; Lucia Hernandez-Rivas; Mayra Jimenez-Morales; Nancy Munoz-Hernandez; Natividad Cruz-Ortiz; Sergio Rangel-Guerrero; Tatiana Nunez-Garcia; Vanessa Rivero-Arredondo                                                                                                                                                                                                                                                                                                                                                                                                                                                                                                                                                                                                                                                                                                                                                                                                                                                                                                                                                                                                                                                                                                                                                                                                                                                                                                                                                                                                                                             |

|                                                                                                                                                                                                                                                                                                                                                                                                                                                                                                                                                                                                                                                                                       |                                                                                                                                                                                                                           |                                                                                                                                                                                                                                                                                                                                                                                                                                                                                                                                                                                                                                                                                                                                                                                                                                                                                                                                                                                                                                                                                                                                                                                                                                                                                                                                                                                                                                                                                                                                                                                    |                                                                                                                                                                                                                                                                                                                                                                                                                                                                                                                                                                                                                                                                                                                                             |
|---------------------------------------------------------------------------------------------------------------------------------------------------------------------------------------------------------------------------------------------------------------------------------------------------------------------------------------------------------------------------------------------------------------------------------------------------------------------------------------------------------------------------------------------------------------------------------------------------------------------------------------------------------------------------------------|---------------------------------------------------------------------------------------------------------------------------------------------------------------------------------------------------------------------------|------------------------------------------------------------------------------------------------------------------------------------------------------------------------------------------------------------------------------------------------------------------------------------------------------------------------------------------------------------------------------------------------------------------------------------------------------------------------------------------------------------------------------------------------------------------------------------------------------------------------------------------------------------------------------------------------------------------------------------------------------------------------------------------------------------------------------------------------------------------------------------------------------------------------------------------------------------------------------------------------------------------------------------------------------------------------------------------------------------------------------------------------------------------------------------------------------------------------------------------------------------------------------------------------------------------------------------------------------------------------------------------------------------------------------------------------------------------------------------------------------------------------------------------------------------------------------------|---------------------------------------------------------------------------------------------------------------------------------------------------------------------------------------------------------------------------------------------------------------------------------------------------------------------------------------------------------------------------------------------------------------------------------------------------------------------------------------------------------------------------------------------------------------------------------------------------------------------------------------------------------------------------------------------------------------------------------------------|
| EPI_ISL_3236433,<br>EPI_ISL_3236435<br>EPI_ISL_1652049                                                                                                                                                                                                                                                                                                                                                                                                                                                                                                                                                                                                                                | Instituto de Medicina Tropical & Salud Global Universidad Iberoamericana<br><br>Integrated Biorepository of H3Africa Uganda - IBRH3AU                                                                                     | Grubaugh Lab - Yale School of Public Health<br><br>Molecular Biology Laboratory                                                                                                                                                                                                                                                                                                                                                                                                                                                                                                                                                                                                                                                                                                                                                                                                                                                                                                                                                                                                                                                                                                                                                                                                                                                                                                                                                                                                                                                                                                    | Alejandro Vallejo Degaudenzi; Anderson Brito; Annie Watkins; Chaney Kalinich; Chantal Vogels; Elisa Contreras; Esperanza Mendoza; Isabel Ott; Jessica Rothman; Joseph Fauver; Kendall Billig; Mallery Breban; Mary Petrone; Nathan Grubaugh; Robert Paulino-Ramirez; Tara Alpert; Tobias Koch; Victor Virgilio Calderon<br><br>Ashaba Fred Katabazi; Bernard Sentalo Bagaya; David Patrick Kateete; Edgar Kigozi; Emmanuel Nasinghe; Eric Katagiriya; Gerald Mbooya; Lwanga Newton; Misaki Wayengera; Moses Jobola; Moses Luutu; Nsubuga Gideon; Rogers Kamulegeya; Samuel Kirimunda; Sarah Stanley; Savannah Mwesigwa                                                                                                                      |
| EPI_ISL_2621626                                                                                                                                                                                                                                                                                                                                                                                                                                                                                                                                                                                                                                                                       | Ipoh Public Health Laboratory (MKAI), Ministry of Health Malaysia                                                                                                                                                         | Institute for Medical Research, Infectious Disease Research Centre, National Institutes of Health, Ministry of Health Malaysia                                                                                                                                                                                                                                                                                                                                                                                                                                                                                                                                                                                                                                                                                                                                                                                                                                                                                                                                                                                                                                                                                                                                                                                                                                                                                                                                                                                                                                                     | Azizan MA; Kamel K; Mohd Zawawi Z; Ramly N; Robert F; Suppiah J; Thayan R                                                                                                                                                                                                                                                                                                                                                                                                                                                                                                                                                                                                                                                                   |
| EPI_ISL_3230443                                                                                                                                                                                                                                                                                                                                                                                                                                                                                                                                                                                                                                                                       | Islab, Pohjois-Karjalan aluelaboratorio                                                                                                                                                                                   | Expert Microbiology, National Institute for Health and Welfare                                                                                                                                                                                                                                                                                                                                                                                                                                                                                                                                                                                                                                                                                                                                                                                                                                                                                                                                                                                                                                                                                                                                                                                                                                                                                                                                                                                                                                                                                                                     | Carita Savolainen-Kopra; Erika Lindh; Haider al-Hello; Jani Halkilaiti; Kirsi Liitsola; Niina Ikonen; Olli Vapalahti; Pekka Ellonen; Phuoc Truong; Päivi Laurila; Ravi Kant; Sari Hannula; Soile Blomqvist; Teemu Smura                                                                                                                                                                                                                                                                                                                                                                                                                                                                                                                     |
| EPI_ISL_3230335,<br>EPI_ISL_3230649                                                                                                                                                                                                                                                                                                                                                                                                                                                                                                                                                                                                                                                   | Islab, Pohjois-Savon aluelaboratorio                                                                                                                                                                                      | Expert Microbiology, National Institute for Health and Welfare                                                                                                                                                                                                                                                                                                                                                                                                                                                                                                                                                                                                                                                                                                                                                                                                                                                                                                                                                                                                                                                                                                                                                                                                                                                                                                                                                                                                                                                                                                                     | Carita Savolainen-Kopra; Erika Lindh; Haider al-Hello; Jani Halkilaiti; Kirsi Liitsola; Niina Ikonen; Olli Vapalahti; Pekka Ellonen; Phuoc Truong; Päivi Laurila; Ravi Kant; Sari Hannula; Soile Blomqvist; Teemu Smura                                                                                                                                                                                                                                                                                                                                                                                                                                                                                                                     |
| EPI_ISL_956392                                                                                                                                                                                                                                                                                                                                                                                                                                                                                                                                                                                                                                                                        | Isolation - Virology Unit, Institut Pasteur du Cambodge; Sequencing - US National Institute of Allergy and Infectious Diseases Cambodia, US Naval Medical Research Unit -2, Cambodia National Institute for Public Health | Virology Unit, Institut Pasteur du Cambodge                                                                                                                                                                                                                                                                                                                                                                                                                                                                                                                                                                                                                                                                                                                                                                                                                                                                                                                                                                                                                                                                                                                                                                                                                                                                                                                                                                                                                                                                                                                                        | Chau Darapeak; Chin Savuth; Erik A Karlsson; Jennifer Bohl; Jessica Manning; Jose A Garcia-Rivera; Kraing Sidonn; Ly Sovann; Sophana Chea; Sreyngim Lay; Veasna Duong; Vireak Heang; Yi Sengdoeurm                                                                                                                                                                                                                                                                                                                                                                                                                                                                                                                                          |
| EPI_ISL_1073448, EPI_ISL_1209704, EPI_ISL_1358782, EPI_ISL_1358897, EPI_ISL_1673898, EPI_ISL_1673921, EPI_ISL_1674303, EPI_ISL_1674509, EPI_ISL_1762240, EPI_ISL_1763697, EPI_ISL_1764129, EPI_ISL_2083442, EPI_ISL_2083927, EPI_ISL_2085642, EPI_ISL_2085669, EPI_ISL_2182323, EPI_ISL_2182799, EPI_ISL_2183063, EPI_ISL_2183588, EPI_ISL_2183663, EPI_ISL_3278321, EPI_ISL_3278412, EPI_ISL_3278431, EPI_ISL_3278446, EPI_ISL_3278497, EPI_ISL_3278548, EPI_ISL_3278561, EPI_ISL_3278565, EPI_ISL_3278601, EPI_ISL_3278692, EPI_ISL_3278811, EPI_ISL_3278813, EPI_ISL_3278999, EPI_ISL_3279015, EPI_ISL_3279041, EPI_ISL_3279055, EPI_ISL_3279326, EPI_ISL_3279354, EPI_ISL_3279362 | Israel National Consortium for SARS-CoV-2 sequencing                                                                                                                                                                      | Assaf Rokney; Dana Bar-Ilan; Danit Sofer; David A. Zeevi; Efrat Dahan Bucris; Efrat Glick-Saar; Efrat Romman; Ella Mendelson; Ephraim Fass; Eva Nachum; Gal Zizelski Valenci; Gideon Rechavi; Israel Nissan; Joseph Jaffe; Maya Davidovich Cohen; Michael Mandelboim; Miranda Geva; Mor Rubinstein; Neta Zuckerman; Netanel Abu; Omer Asraf; Omer Murik; Omri Nayshool; Oran Erster; Orna Mor; Tzvia Mann                                                                                                                                                                                                                                                                                                                                                                                                                                                                                                                                                                                                                                                                                                                                                                                                                                                                                                                                                                                                                                                                                                                                                                          |                                                                                                                                                                                                                                                                                                                                                                                                                                                                                                                                                                                                                                                                                                                                             |
| see above                                                                                                                                                                                                                                                                                                                                                                                                                                                                                                                                                                                                                                                                             | Israel Central Virology laboratory                                                                                                                                                                                        | Israa National Consortium for SARS-CoV-2 sequencing                                                                                                                                                                                                                                                                                                                                                                                                                                                                                                                                                                                                                                                                                                                                                                                                                                                                                                                                                                                                                                                                                                                                                                                                                                                                                                                                                                                                                                                                                                                                | Ancora M; Biagetti M.; Calistri P; Cammà C; Curini V; Delli Compagni E; Di Domenico M; Di Pasquale A; Giammaroli M.; Lorusso A; Mangone I; Marccacci M; Puglia I; Rinaldi A; Savini G; Scialabba S                                                                                                                                                                                                                                                                                                                                                                                                                                                                                                                                          |
| EPI_ISL_2047853                                                                                                                                                                                                                                                                                                                                                                                                                                                                                                                                                                                                                                                                       | Istituto Zooprofilattico Sperimentale Umbria e Marche "Togo Rosati"                                                                                                                                                       | Istituto Zooprofilattico Sperimentale dell'Abruzzo e Molise "G. Caporale"                                                                                                                                                                                                                                                                                                                                                                                                                                                                                                                                                                                                                                                                                                                                                                                                                                                                                                                                                                                                                                                                                                                                                                                                                                                                                                                                                                                                                                                                                                          |                                                                                                                                                                                                                                                                                                                                                                                                                                                                                                                                                                                                                                                                                                                                             |
| EPI_ISL_837303, EPI_ISL_960622, EPI_ISL_1287554, EPI_ISL_1287731, EPI_ISL_1424299, EPI_ISL_1569715, EPI_ISL_1630018, EPI_ISL_1630042, EPI_ISL_1630112, EPI_ISL_1656230, EPI_ISL_1656281, EPI_ISL_1673406, EPI_ISL_1673524, EPI_ISL_1673626, EPI_ISL_1714876, EPI_ISL_1714987, EPI_ISL_1759433, EPI_ISL_1759505, EPI_ISL_1759633, EPI_ISL_1793157, EPI_ISL_1793237, EPI_ISL_1793356, EPI_ISL_2029543, EPI_ISL_2029586, EPI_ISL_2153336, EPI_ISL_2194262, EPI_ISL_6594940, EPI_ISL_6594971, EPI_ISL_6594976                                                                                                                                                                             | Istituto Zooprofilattico Sperimentale del Mezzogiorno                                                                                                                                                                     | TIGEM<br>Andrea Ballabio; Anna Manfredi; Antonio Grimaldi; Antonio Grimaldi Patrizia Annunziata Francesco Panariello Biancamaria Pierri Claudia Tiberio Valentina Bouche Chiara Colantuono Maria Concetta Cuomo Denise Di Concilio Lucio Di Filippo Anna Manfredi Marcello Salvi Antonio Limone Luigi Atripaldi Pellegrino Cerino Andrea Ballabio Davide Cacchiarelli; Antonio Grimaldi Patrizia Annunziata Francesco Panariello Biancamaria Pierri Claudia Tiberio Teresa Giuliano Valentina Bouche Chiara Colantuono Maria Concetta Cuomo Denise Di Concilio Lucio Di Filippo Anna Manfredi Marcello Salvi Antonio Limone Luigi Atripaldi Pellegrino Cerino Andrea Ballabio Davide Cacchiarelli; Antonio Grimaldi Patrizia Annunziata Francesco Panariello Claudia Tiberio Teresa Giuliano Valentina Bouche Chiara Colantuono Lucio Di Filippo Anna Manfredi Marcello Salvi Antonio Limone Luigi Atripaldi Andrea Ballabio Davide Cacchiarelli; Antonio Grimaldi Patrizia Annunziata Francesco Panariello Claudia Tiberio Teresa Giuliano Valentina Bouche Chiara Colantuono Lucio Di Filippo Ornella Leone Anna Manfredi Marcello Salvi Antonio Limone Luigi Atripaldi Andrea Ballabio Davide Cacchiarelli; Antonio Limone; Antonio Limone Luigi Atripaldi Pellegrino Cerino; Biancamaria Pierri; Biancamaria Pierri Claudia Tiberio Valentina Bouche; Chiara Colantuono; Davide Cacchiarelli; Davide Cacchiarelli.; Denise Di Concilio; Francesco Panariello; Lucio Di Filippo; Marcello Salvi; Maria Concetta Cuomo; Patrizia Annunziata; Pellegrino Cerino; Valentina Bouche |                                                                                                                                                                                                                                                                                                                                                                                                                                                                                                                                                                                                                                                                                                                                             |
| see above                                                                                                                                                                                                                                                                                                                                                                                                                                                                                                                                                                                                                                                                             |                                                                                                                                                                                                                           |                                                                                                                                                                                                                                                                                                                                                                                                                                                                                                                                                                                                                                                                                                                                                                                                                                                                                                                                                                                                                                                                                                                                                                                                                                                                                                                                                                                                                                                                                                                                                                                    |                                                                                                                                                                                                                                                                                                                                                                                                                                                                                                                                                                                                                                                                                                                                             |
| EPI_ISL_794773,<br>EPI_ISL_794774,<br>EPI_ISL_876770,<br>EPI_ISL_876795,<br>EPI_ISL_1008686,<br>EPI_ISL_1008687                                                                                                                                                                                                                                                                                                                                                                                                                                                                                                                                                                       | Istituto Zooprofilattico Sperimentale della Puglia e della Basilicata                                                                                                                                                     | Istituto Zooprofilattico Sperimentale della Puglia e della Basilicata                                                                                                                                                                                                                                                                                                                                                                                                                                                                                                                                                                                                                                                                                                                                                                                                                                                                                                                                                                                                                                                                                                                                                                                                                                                                                                                                                                                                                                                                                                              | Bianco A.; Capozzi L.; Chironna M.; Cipolletta D.; Del Sembro L.; Galante D.; Loconsole D.; Manzulli V; Pace L.; Parisi A.; Ridolfi D.; Rondinone V.; Sallustio A.; Simone D.                                                                                                                                                                                                                                                                                                                                                                                                                                                                                                                                                               |
| EPI_ISL_1624776                                                                                                                                                                                                                                                                                                                                                                                                                                                                                                                                                                                                                                                                       | J.W. Ruby Memorial Hospital                                                                                                                                                                                               | WVU and Marshall University Combined Genomics Core Facilities                                                                                                                                                                                                                                                                                                                                                                                                                                                                                                                                                                                                                                                                                                                                                                                                                                                                                                                                                                                                                                                                                                                                                                                                                                                                                                                                                                                                                                                                                                                      | James Denvir; Peter Perrotta; Peter Stoilov; Ryan Percifield; Wesley Kimble                                                                                                                                                                                                                                                                                                                                                                                                                                                                                                                                                                                                                                                                 |
| EPI_ISL_3265329,<br>EPI_ISL_3275884                                                                                                                                                                                                                                                                                                                                                                                                                                                                                                                                                                                                                                                   | JIPMER Puducherry                                                                                                                                                                                                         | inStem NCBS - INSACOG                                                                                                                                                                                                                                                                                                                                                                                                                                                                                                                                                                                                                                                                                                                                                                                                                                                                                                                                                                                                                                                                                                                                                                                                                                                                                                                                                                                                                                                                                                                                                              | Uma Ramakrishnan Dasaradhi Palakodeti Aswin SaiNarain; Uma Ramakrishnan Dasaradhi Palakodeti Aswin SaiNarain                                                                                                                                                                                                                                                                                                                                                                                                                                                                                                                                                                                                                                |
| EPI_ISL_4122298,<br>EPI_ISL_4122304                                                                                                                                                                                                                                                                                                                                                                                                                                                                                                                                                                                                                                                   | JKN PAHANG                                                                                                                                                                                                                | iPROMISE, UTM                                                                                                                                                                                                                                                                                                                                                                                                                                                                                                                                                                                                                                                                                                                                                                                                                                                                                                                                                                                                                                                                                                                                                                                                                                                                                                                                                                                                                                                                                                                                                                      | Ariza Adnan; Fadzilah Mohd Nor; Lim Wei Feng; Mohd Asif Mohd Sukri; Mohd Nur Fakhruzzaman Noorizhab; Mohd Zaki Salleh; Sazzli Shahlan Kassim; Siti Farah Alwani Mohd Naw; Siti Hamimah Sheikh Abdul Kadir; Teh Lay Kek; Wang Seok Mui                                                                                                                                                                                                                                                                                                                                                                                                                                                                                                       |
| EPI_ISL_4085138                                                                                                                                                                                                                                                                                                                                                                                                                                                                                                                                                                                                                                                                       | Jahra Hospital                                                                                                                                                                                                            | Kuwait cancer control center                                                                                                                                                                                                                                                                                                                                                                                                                                                                                                                                                                                                                                                                                                                                                                                                                                                                                                                                                                                                                                                                                                                                                                                                                                                                                                                                                                                                                                                                                                                                                       | Mona Alateeqi; Shakir Bahzad                                                                                                                                                                                                                                                                                                                                                                                                                                                                                                                                                                                                                                                                                                                |
| EPI_ISL_416565, EPI_ISL_416566, EPI_ISL_416567, EPI_ISL_416579, EPI_ISL_416581, EPI_ISL_416582, EPI_ISL_416583, EPI_ISL_416585, EPI_ISL_416587, EPI_ISL_416588, EPI_ISL_416589, EPI_ISL_416590, EPI_ISL_416593, EPI_ISL_416599, EPI_ISL_416600, EPI_ISL_416601, EPI_ISL_416602, EPI_ISL_416603, EPI_ISL_416604, EPI_ISL_416608, EPI_ISL_416615, EPI_ISL_416618, EPI_ISL_416620, EPI_ISL_416621, EPI_ISL_416625, EPI_ISL_416626, EPI_ISL_416630, EPI_ISL_416633                                                                                                                                                                                                                        | Japanese Quarantine Stations                                                                                                                                                                                              | Pathogen Genomics Center, National Institute of Infectious Diseases<br>Hajime Kamiya; Hideki Hasegawa; Ikuyo Takayama; Kentaro Itokawa; Makoto Kuroda; Masanori Hashino; Motoi Suzuki; Rina Tanaka; Shinji Saito; Takaji Wakita; Takuri Takahashi; Takuya Yamagishi; Tsutomu Kageyama; Tsuyoshi Sekizuka                                                                                                                                                                                                                                                                                                                                                                                                                                                                                                                                                                                                                                                                                                                                                                                                                                                                                                                                                                                                                                                                                                                                                                                                                                                                           |                                                                                                                                                                                                                                                                                                                                                                                                                                                                                                                                                                                                                                                                                                                                             |
| see above                                                                                                                                                                                                                                                                                                                                                                                                                                                                                                                                                                                                                                                                             |                                                                                                                                                                                                                           |                                                                                                                                                                                                                                                                                                                                                                                                                                                                                                                                                                                                                                                                                                                                                                                                                                                                                                                                                                                                                                                                                                                                                                                                                                                                                                                                                                                                                                                                                                                                                                                    |                                                                                                                                                                                                                                                                                                                                                                                                                                                                                                                                                                                                                                                                                                                                             |
| EPI_ISL_2007240                                                                                                                                                                                                                                                                                                                                                                                                                                                                                                                                                                                                                                                                       | Jessa                                                                                                                                                                                                                     | Jessa                                                                                                                                                                                                                                                                                                                                                                                                                                                                                                                                                                                                                                                                                                                                                                                                                                                                                                                                                                                                                                                                                                                                                                                                                                                                                                                                                                                                                                                                                                                                                                              | Berden et al. on behalf of the jessa_cmdLab                                                                                                                                                                                                                                                                                                                                                                                                                                                                                                                                                                                                                                                                                                 |
| EPI_ISL_412459                                                                                                                                                                                                                                                                                                                                                                                                                                                                                                                                                                                                                                                                        | Jingzhou Center for Disease Control and Prevention                                                                                                                                                                        | Hubei Provincial Center for Disease Control and Prevention                                                                                                                                                                                                                                                                                                                                                                                                                                                                                                                                                                                                                                                                                                                                                                                                                                                                                                                                                                                                                                                                                                                                                                                                                                                                                                                                                                                                                                                                                                                         | Bin Fang; Bo Yang; Bo Yu; Chunlin Mao; Faxian Zhan; Guojun Ye; Jie Hu; Jing Li; Junqiang Xu; Kun Cai; Linlin Liu; Maoyi Chen; Xiang Li; Xiao Yu; Xixiang Huo; Yongzhong Jiang.                                                                                                                                                                                                                                                                                                                                                                                                                                                                                                                                                              |
| EPI_ISL_911916,<br>EPI_ISL_1402913,<br>EPI_ISL_1805806                                                                                                                                                                                                                                                                                                                                                                                                                                                                                                                                                                                                                                | Johns Hopkins Hospital Department of Pathology                                                                                                                                                                            | Johns Hopkins Hospital Department of Pathology                                                                                                                                                                                                                                                                                                                                                                                                                                                                                                                                                                                                                                                                                                                                                                                                                                                                                                                                                                                                                                                                                                                                                                                                                                                                                                                                                                                                                                                                                                                                     | Adannaya Amadi; C. Paul Morris; Chun Huai Luo; Heba H. Mostafa; Matthew Schwartz; Nicholas Gallagher                                                                                                                                                                                                                                                                                                                                                                                                                                                                                                                                                                                                                                        |
| EPI_ISL_6075191                                                                                                                                                                                                                                                                                                                                                                                                                                                                                                                                                                                                                                                                       | Jordan Royal Medical Services Mobil Biological Lab                                                                                                                                                                        | Jordan Royal Medical Services Genomics Core Lab                                                                                                                                                                                                                                                                                                                                                                                                                                                                                                                                                                                                                                                                                                                                                                                                                                                                                                                                                                                                                                                                                                                                                                                                                                                                                                                                                                                                                                                                                                                                    | Abdullah Almuhaseen; Alanood Alhabashnah; Ali Alhuniti; Dr. Rame Hamdi khasawneh; Mohammad Barmawi; Osama Alshdaifat                                                                                                                                                                                                                                                                                                                                                                                                                                                                                                                                                                                                                        |
| EPI_ISL_5803190                                                                                                                                                                                                                                                                                                                                                                                                                                                                                                                                                                                                                                                                       | Jordan Royal Medical Services Mobile Biological Lab                                                                                                                                                                       | Jordan Royal Medical Services Genomics Core Lab                                                                                                                                                                                                                                                                                                                                                                                                                                                                                                                                                                                                                                                                                                                                                                                                                                                                                                                                                                                                                                                                                                                                                                                                                                                                                                                                                                                                                                                                                                                                    | Abdullah Almuhaseen; Alanood Alhabashnah; Ali Alhuniti; Dr. Rame Hamdi khasawneh; Mohammad Barmawi; Osama Alshdaifat                                                                                                                                                                                                                                                                                                                                                                                                                                                                                                                                                                                                                        |
| EPI_ISL_4207303                                                                                                                                                                                                                                                                                                                                                                                                                                                                                                                                                                                                                                                                       | Jordan Royal Medical Services Mobile Biological Lab                                                                                                                                                                       | Jordan Royal Medical Services Oncology Lab                                                                                                                                                                                                                                                                                                                                                                                                                                                                                                                                                                                                                                                                                                                                                                                                                                                                                                                                                                                                                                                                                                                                                                                                                                                                                                                                                                                                                                                                                                                                         | DR. RAME HAMDI KHASAWNEH                                                                                                                                                                                                                                                                                                                                                                                                                                                                                                                                                                                                                                                                                                                    |
| EPI_ISL_2189465                                                                                                                                                                                                                                                                                                                                                                                                                                                                                                                                                                                                                                                                       | Jose B. Lingad Memorial General Hospital                                                                                                                                                                                  | Philippine Genome Center                                                                                                                                                                                                                                                                                                                                                                                                                                                                                                                                                                                                                                                                                                                                                                                                                                                                                                                                                                                                                                                                                                                                                                                                                                                                                                                                                                                                                                                                                                                                                           | Alethea R. de Guzman; Anna Ong-Lim; Arianne A. Zamora; Asia Louisa U. Chong; Benedict A. Maralit; Candice Francheska B. Tambaon; Carlo M. Lapid; Celia Carlos; Devon Ray Pacial; Edsel Maurice Salvaña; El King D. Morado; Elcid Aaron R. Panglinan; Eva Maria Cutiongco-de la Paz; Francis A. Tablizo; Irish Coleen A. Asin; Jaime C. Montoya; Jan Michael C. Yap; Jo-Hannah S. Llamas; John Q. Wong; Joshua Gregor A. Dizon; Juan Antonio R. Magalang; Karol Sophia Agape R. Padilla; Kenneth M. Kim; Kris P. Punayan; Marc Edsel C. Ayes; Maria Rosario Singh-Vergeire and Cynthia P. Saloma; Maria Sofia L. Yangzon; Marissa Alejandria; Razel Nikka M. Hao; Renato Jacinto Q. Mantaring; Rianna Patricia S. Cruz; Sheila Mae M. Araiza |
| EPI_ISL_2964623,<br>EPI_ISL_3232536,<br>EPI_ISL_3232540,<br>EPI_ISL_3908506                                                                                                                                                                                                                                                                                                                                                                                                                                                                                                                                                                                                           | Juntendo University Hospital                                                                                                                                                                                              | Juntendo University Hospital                                                                                                                                                                                                                                                                                                                                                                                                                                                                                                                                                                                                                                                                                                                                                                                                                                                                                                                                                                                                                                                                                                                                                                                                                                                                                                                                                                                                                                                                                                                                                       | Koji Tsuchiya; Yoko Tabe; Yoshie Hosaka                                                                                                                                                                                                                                                                                                                                                                                                                                                                                                                                                                                                                                                                                                     |
| EPI_ISL_6540187,<br>EPI_ISL_6540236,<br>EPI_ISL_6575566,<br>EPI_ISL_6584494                                                                                                                                                                                                                                                                                                                                                                                                                                                                                                                                                                                                           | KANSAI MEDIKAL UNIVERSITY MEDICAL CENTER                                                                                                                                                                                  | KANSAI MEDIKAL UNIVERSITY MEDICAL CENTER                                                                                                                                                                                                                                                                                                                                                                                                                                                                                                                                                                                                                                                                                                                                                                                                                                                                                                                                                                                                                                                                                                                                                                                                                                                                                                                                                                                                                                                                                                                                           | Masami Kashiwara                                                                                                                                                                                                                                                                                                                                                                                                                                                                                                                                                                                                                                                                                                                            |
| EPI_ISL_486397                                                                                                                                                                                                                                                                                                                                                                                                                                                                                                                                                                                                                                                                        | KC General Hospital                                                                                                                                                                                                       | Department of Neurovirology, National Institute of Mental Health and Neuroscience (NIMHANS)                                                                                                                                                                                                                                                                                                                                                                                                                                                                                                                                                                                                                                                                                                                                                                                                                                                                                                                                                                                                                                                                                                                                                                                                                                                                                                                                                                                                                                                                                        | Anita Desai; Chitra Pattabiraman; Harsha PK; Manjunatha Venkataswamy; Ravi Vasanthapuram; Risha Rasheed; Shafeeq S Hameed; Vijayalakshmi Reddy                                                                                                                                                                                                                                                                                                                                                                                                                                                                                                                                                                                              |
| EPI_ISL_2779546                                                                                                                                                                                                                                                                                                                                                                                                                                                                                                                                                                                                                                                                       | KCRH KEMRI/DEID Surveillance Site                                                                                                                                                                                         | USAMRD-A, Basic Science Laboratory                                                                                                                                                                                                                                                                                                                                                                                                                                                                                                                                                                                                                                                                                                                                                                                                                                                                                                                                                                                                                                                                                                                                                                                                                                                                                                                                                                                                                                                                                                                                                 | Alan Lemtudo; Beth Mutai; Brian Andika; Carol Kifude; Clement Masakwe; Eric Muthanje; Esther Omuseni; Faith Sigei; Gathii Kimita; George Awinda; John Waitumbi; Josaph Nyataya; Rachel Githii; Rehema Liyai; Stephen Ochola                                                                                                                                                                                                                                                                                                                                                                                                                                                                                                                 |
| EPI_ISL_1610600                                                                                                                                                                                                                                                                                                                                                                                                                                                                                                                                                                                                                                                                       | KEMRI Center for Biotechnology Research and Development                                                                                                                                                                   | KEMRI-Wellcome Trust Research Programme,Kilifi                                                                                                                                                                                                                                                                                                                                                                                                                                                                                                                                                                                                                                                                                                                                                                                                                                                                                                                                                                                                                                                                                                                                                                                                                                                                                                                                                                                                                                                                                                                                     | Githinji G.; Matoke D.; Mburu M.W.; Mohamed K.S.; Thiongo K.; de Laurent Z.                                                                                                                                                                                                                                                                                                                                                                                                                                                                                                                                                                                                                                                                 |
| EPI_ISL_2603070                                                                                                                                                                                                                                                                                                                                                                                                                                                                                                                                                                                                                                                                       | KEMRI-Wellcome Trust Research Programme,Kilifi                                                                                                                                                                            | KEMRI-Wellcome Trust Research Programme,Kilifi                                                                                                                                                                                                                                                                                                                                                                                                                                                                                                                                                                                                                                                                                                                                                                                                                                                                                                                                                                                                                                                                                                                                                                                                                                                                                                                                                                                                                                                                                                                                     | ; Githinji G.; Matoke D.; Mburu M.W.; Mohamed K.S.; Onyango C.; de Laurent Z.                                                                                                                                                                                                                                                                                                                                                                                                                                                                                                                                                                                                                                                               |
| EPI_ISL_415153, EPI_ISL_415158, EPI_ISL_416471, EPI_ISL_417425, EPI_ISL_417428, EPI_ISL_417430, EPI_ISL_418792, EPI_ISL_418794, EPI_ISL_418798, EPI_ISL_418805, EPI_ISL_418984, EPI_ISL_418985, EPI_ISL_418986, EPI_ISL_418987                                                                                                                                                                                                                                                                                                                                                                                                                                                        | see above                                                                                                                                                                                                                 | KU Leuven, Clinical and Epidemiological Virology                                                                                                                                                                                                                                                                                                                                                                                                                                                                                                                                                                                                                                                                                                                                                                                                                                                                                                                                                                                                                                                                                                                                                                                                                                                                                                                                                                                                                                                                                                                                   | Bert Vanmechelen; Joan Marti-Carerras; Joan Marti-Carerras; Marc Van Ranst; Piet Maes; Tony Wawina                                                                                                                                                                                                                                                                                                                                                                                                                                                                                                                                                                                                                                          |
| see above                                                                                                                                                                                                                                                                                                                                                                                                                                                                                                                                                                                                                                                                             | KU Leuven, Clinical and Epidemiological Virology                                                                                                                                                                          | KU Leuven, Clinical and Epidemiological Virology                                                                                                                                                                                                                                                                                                                                                                                                                                                                                                                                                                                                                                                                                                                                                                                                                                                                                                                                                                                                                                                                                                                                                                                                                                                                                                                                                                                                                                                                                                                                   |                                                                                                                                                                                                                                                                                                                                                                                                                                                                                                                                                                                                                                                                                                                                             |
| EPI_ISL_464084, EPI_ISL_896459, EPI_ISL_1322554, EPI_ISL_1380514, EPI_ISL_1380820, EPI_ISL_1382335, EPI_ISL_1382348, EPI_ISL_1382494, EPI_ISL_1382630, EPI_ISL_1382807, EPI_ISL_2964721, EPI_ISL_2964752, EPI_ISL_2964847, EPI_ISL_2964888, EPI_ISL_2964911                                                                                                                                                                                                                                                                                                                                                                                                                           | see above                                                                                                                                                                                                                 | KU Leuven, Rega Institute, Clinical and Epidemiological Virology                                                                                                                                                                                                                                                                                                                                                                                                                                                                                                                                                                                                                                                                                                                                                                                                                                                                                                                                                                                                                                                                                                                                                                                                                                                                                                                                                                                                                                                                                                                   | Bert Vanmechelen; Joan Marti-Carerras; Piet Maes; Tony Wawina-Bokalanga                                                                                                                                                                                                                                                                                                                                                                                                                                                                                                                                                                                                                                                                     |
| see above                                                                                                                                                                                                                                                                                                                                                                                                                                                                                                                                                                                                                                                                             | KU Leuven, Rega Institute, Clinical and Epidemiological Virology                                                                                                                                                          | KU Leuven, Rega Institute, Clinical and Epidemiological Virology                                                                                                                                                                                                                                                                                                                                                                                                                                                                                                                                                                                                                                                                                                                                                                                                                                                                                                                                                                                                                                                                                                                                                                                                                                                                                                                                                                                                                                                                                                                   |                                                                                                                                                                                                                                                                                                                                                                                                                                                                                                                                                                                                                                                                                                                                             |
| EPI_ISL_3183667,<br>EPI_ISL_3183670,<br>EPI_ISL_3183677                                                                                                                                                                                                                                                                                                                                                                                                                                                                                                                                                                                                                               | Kagoshima Prefectural Institute for Environmental Research and Public Health                                                                                                                                              | Kagoshima Prefectural Institute for Environmental Research and Public Health                                                                                                                                                                                                                                                                                                                                                                                                                                                                                                                                                                                                                                                                                                                                                                                                                                                                                                                                                                                                                                                                                                                                                                                                                                                                                                                                                                                                                                                                                                       | Kanji Ishitani; Kazuki Manabe; Kentaro Itokawa; Makoto Kuroda; Mami Yamamoto; Masanori Hashino; Naomi Shinkawa; Rina Tanaka; Takako Kiyotake; Tsuyoshi Sekizuka; Yuka Hamada                                                                                                                                                                                                                                                                                                                                                                                                                                                                                                                                                                |

|                                                                                                                                                                                                                                                                                                                                                                                                                                                                                                                                                                                                                                                                                                                                                                                                                                                                                                                                                                                                                                                                                                                                                                                                                                                                                                                                                                                                                                                                                                                                                                                                                                                                                                                                                                                     |                                                                                                |                                                                                                                                                                                                                                |                                                                                                                                                                                                                                                                                                   |
|-------------------------------------------------------------------------------------------------------------------------------------------------------------------------------------------------------------------------------------------------------------------------------------------------------------------------------------------------------------------------------------------------------------------------------------------------------------------------------------------------------------------------------------------------------------------------------------------------------------------------------------------------------------------------------------------------------------------------------------------------------------------------------------------------------------------------------------------------------------------------------------------------------------------------------------------------------------------------------------------------------------------------------------------------------------------------------------------------------------------------------------------------------------------------------------------------------------------------------------------------------------------------------------------------------------------------------------------------------------------------------------------------------------------------------------------------------------------------------------------------------------------------------------------------------------------------------------------------------------------------------------------------------------------------------------------------------------------------------------------------------------------------------------|------------------------------------------------------------------------------------------------|--------------------------------------------------------------------------------------------------------------------------------------------------------------------------------------------------------------------------------|---------------------------------------------------------------------------------------------------------------------------------------------------------------------------------------------------------------------------------------------------------------------------------------------------|
| EPI_ISL_2343250                                                                                                                                                                                                                                                                                                                                                                                                                                                                                                                                                                                                                                                                                                                                                                                                                                                                                                                                                                                                                                                                                                                                                                                                                                                                                                                                                                                                                                                                                                                                                                                                                                                                                                                                                                     | Kampot Rapid Response Team                                                                     | Virology Unit, Institut Pasteur du Cambodge                                                                                                                                                                                    | Cecile Troupin; Chau Darapeak; Chin Savuth; Erik A Karlsson; Jurre Y Siegers; Kraing Sidonn; Leakhena Pum; Ly Sovann; Veasna Duong; Yi Sengdoern                                                                                                                                                  |
| EPI_ISL_3191712, EPI_ISL_3191729, EPI_ISL_687053                                                                                                                                                                                                                                                                                                                                                                                                                                                                                                                                                                                                                                                                                                                                                                                                                                                                                                                                                                                                                                                                                                                                                                                                                                                                                                                                                                                                                                                                                                                                                                                                                                                                                                                                    | Kanagawa Prefectural Institute of Public Health                                                | Kanagawa Prefectural Institute of Public Health                                                                                                                                                                                | Itsumi Toyokura; Junichi Sakuragi; Kentaro Itokawa; Makiko Kondo; Makoto Kuroda; Masanori Hashino; Rieko Suzuki; Rina Tanaka; Sumi Watanabe; Takako Sano; Takayuki Hishiki; Tomohiko Takasaki; Tsuyoshi Sekizuka                                                                                  |
| EPI_ISL_2101374, EPI_ISL_2789916, EPI_ISL_3216941, EPI_ISL_2047556                                                                                                                                                                                                                                                                                                                                                                                                                                                                                                                                                                                                                                                                                                                                                                                                                                                                                                                                                                                                                                                                                                                                                                                                                                                                                                                                                                                                                                                                                                                                                                                                                                                                                                                  | Kanagawa Prefectural Institute of Public Health                                                | Pathogen Genomics Center, National Institute of Infectious Diseases                                                                                                                                                            | Kentaro Itokawa; Makoto Kuroda; Masanori Hashino; Rina Tanaka; Tsuyoshi Sekizuka                                                                                                                                                                                                                  |
| EPI_ISL_454884, EPI_ISL_475090, EPI_ISL_3184016, EPI_ISL_6563467                                                                                                                                                                                                                                                                                                                                                                                                                                                                                                                                                                                                                                                                                                                                                                                                                                                                                                                                                                                                                                                                                                                                                                                                                                                                                                                                                                                                                                                                                                                                                                                                                                                                                                                    | Kansas Health and Environmental Lab                                                            | Kansas Health and Environmental Lab                                                                                                                                                                                            | Ben Olsen; Jonathan Barnell; Katherine Wiggins; Mike Grose; and Phil Adam                                                                                                                                                                                                                         |
| EPI_ISL_6606895                                                                                                                                                                                                                                                                                                                                                                                                                                                                                                                                                                                                                                                                                                                                                                                                                                                                                                                                                                                                                                                                                                                                                                                                                                                                                                                                                                                                                                                                                                                                                                                                                                                                                                                                                                     | Kariminejad-Najmabadi Pathology & Genetics Center, Tehran, Iran                                | National Institute of Health Research and Development Genetics Research Center, University of Social Welfare and Rehabilitation Sciences                                                                                       | Arie Ardiansyah Nugraha; Arief Budi Witarto; Hana Apsari Pawestri; Hartanti Dian Ikawati; Kartika Dewi Puspa; Krisna Pangesti; Laily Indrayanti; Lalu Hamzi Fikri; Nelly Puspandari; Nurhandini Eka Dewi; Rian Adha Ardinata; Subangkit; Triyani Soekarso; Vivi Setiawaty                         |
| EPI_ISL_454884, EPI_ISL_475090, EPI_ISL_3184016, EPI_ISL_6563467                                                                                                                                                                                                                                                                                                                                                                                                                                                                                                                                                                                                                                                                                                                                                                                                                                                                                                                                                                                                                                                                                                                                                                                                                                                                                                                                                                                                                                                                                                                                                                                                                                                                                                                    | Karolinska Universitetslaboratoriet                                                            | The Public Health Agency of Sweden                                                                                                                                                                                             | Anna Risberg; Anna-Malin Linde; Karin Tegmark-Wisell; Maria Lind Karlberg; Mattias Haukland; Olov Svartstrom; Oskar Karlsson Lindsjo; Petra Edquist; Reza Advani; Sandra Broddesson; Shamam Muradrasoli                                                                                           |
| EPI_ISL_3184289, EPI_ISL_6563183, EPI_ISL_6563188, EPI_ISL_6563189, EPI_ISL_6563196, EPI_ISL_6563202, EPI_ISL_6563207, EPI_ISL_6563219, EPI_ISL_6563222, EPI_ISL_6563227, EPI_ISL_6563234, EPI_ISL_6563241, EPI_ISL_6563244, EPI_ISL_6563246, EPI_ISL_6563260, EPI_ISL_6563274, EPI_ISL_6563283, EPI_ISL_6563299, EPI_ISL_6563310, EPI_ISL_6563311, EPI_ISL_6563329, EPI_ISL_6563337, EPI_ISL_6563355, EPI_ISL_6563365, EPI_ISL_6563472, EPI_ISL_6563513, EPI_ISL_6563524, EPI_ISL_6563564, EPI_ISL_6563567, EPI_ISL_6563570, EPI_ISL_6563818, EPI_ISL_6563822, EPI_ISL_6563838, EPI_ISL_6563851, EPI_ISL_6563852, EPI_ISL_6563853, EPI_ISL_6563854, EPI_ISL_6563866, EPI_ISL_6563869, EPI_ISL_6563890, EPI_ISL_6563904, EPI_ISL_6563906, EPI_ISL_6563916, EPI_ISL_6563925, EPI_ISL_6563926, EPI_ISL_6563927, EPI_ISL_6563936, EPI_ISL_6563938, EPI_ISL_6563946, EPI_ISL_6563965, EPI_ISL_6563988, EPI_ISL_6564009, EPI_ISL_6564065, EPI_ISL_6564075, EPI_ISL_6564081, EPI_ISL_6564118, EPI_ISL_6564119, EPI_ISL_6564130, EPI_ISL_6564134, EPI_ISL_6564146, EPI_ISL_6564165, EPI_ISL_6564169, EPI_ISL_6564173, EPI_ISL_6564179, EPI_ISL_6564212, EPI_ISL_6564213, EPI_ISL_6564226, EPI_ISL_6564231, EPI_ISL_6564238, EPI_ISL_6564247, EPI_ISL_6564251, EPI_ISL_6564312, EPI_ISL_6564344, EPI_ISL_6564345, EPI_ISL_6564347, EPI_ISL_6564351, EPI_ISL_6564382, EPI_ISL_6564402, EPI_ISL_6564410, EPI_ISL_6564418, EPI_ISL_6564420, EPI_ISL_6564430, EPI_ISL_6564431, EPI_ISL_6564432, EPI_ISL_6564433, EPI_ISL_6564434, EPI_ISL_6564435, EPI_ISL_6564436, EPI_ISL_6564437, EPI_ISL_6564438, EPI_ISL_6564439, EPI_ISL_6564498, EPI_ISL_6564508, EPI_ISL_6564521, EPI_ISL_6564524, EPI_ISL_6564532, EPI_ISL_6564541, EPI_ISL_6564548, EPI_ISL_6564570, EPI_ISL_6564855, EPI_ISL_6564857 | Karolinska University Hospital                                                                 | Annelie Bjerknær; Isak Sylvin; Jan Albert; Karolina Ininbergs; Lina Guerra Blomqvist; Lynda Eneh; Martin Ekman; Martina Wahlund; Robert Dyrdak; Sandra Broddesson; Tanja Normark; Tobias Allander; Valtteri Wirta; Zhibing Yun |                                                                                                                                                                                                                                                                                                   |
| EPI_ISL_6684761, EPI_ISL_6684804, EPI_ISL_6690109, EPI_ISL_6690117, EPI_ISL_6690146, EPI_ISL_6690175, EPI_ISL_6690181, EPI_ISL_6691300, EPI_ISL_6691699, EPI_ISL_6691850, EPI_ISL_6691987                                                                                                                                                                                                                                                                                                                                                                                                                                                                                                                                                                                                                                                                                                                                                                                                                                                                                                                                                                                                                                                                                                                                                                                                                                                                                                                                                                                                                                                                                                                                                                                           | Karolinska University Hospital Solna                                                           | Karolinska University Hospital                                                                                                                                                                                                 | Annelie Bjerknær; Isak Sylvin; Jan Albert; Karolina Ininbergs; Lina Guerra Blomqvist; Lynda Eneh; Martin Ekman; Martina Wahlund; Robert Dyrdak; Sandra Broddesson; Tanja Normark; Tobias Allander; Valtteri Wirta; Zhibing Yun                                                                    |
| EPI_ISL_1973141                                                                                                                                                                                                                                                                                                                                                                                                                                                                                                                                                                                                                                                                                                                                                                                                                                                                                                                                                                                                                                                                                                                                                                                                                                                                                                                                                                                                                                                                                                                                                                                                                                                                                                                                                                     | Kasturba Hospital Molecular Lab - INSACOG                                                      | Kasturba hospital WGS                                                                                                                                                                                                          | Jayanthi Shastri; Vidushi Chitalia                                                                                                                                                                                                                                                                |
| EPI_ISL_3396055, EPI_ISL_411957                                                                                                                                                                                                                                                                                                                                                                                                                                                                                                                                                                                                                                                                                                                                                                                                                                                                                                                                                                                                                                                                                                                                                                                                                                                                                                                                                                                                                                                                                                                                                                                                                                                                                                                                                     | Keio University School of Medicine                                                             | Keio University School of Medicine                                                                                                                                                                                             | Haruhiko Siomi; Hirotsugu Ishizu; Kenjiro Kosaki; Kodai Abe; Yuka Iwasaki                                                                                                                                                                                                                         |
| EPI_ISL_411957                                                                                                                                                                                                                                                                                                                                                                                                                                                                                                                                                                                                                                                                                                                                                                                                                                                                                                                                                                                                                                                                                                                                                                                                                                                                                                                                                                                                                                                                                                                                                                                                                                                                                                                                                                      | Key Laboratory of Human Diseases, Comparative Medicine, Institute of Laboratory Animal Science | Key Laboratory of Human Diseases, Comparative Medicine, Institute of Laboratory Animal Science                                                                                                                                 | Conghui, W.; Feifei, Q.; Fengdi, L.; Guanpeng, W.; Hong, G.; J. and Chuan, Q.; Jiangning, L.; Jing, X.; Lan, C.; Li, G.; Lili, R.; Linlin, B.; Mingya, L.; Pin, Y.; Qi, Q.; Qi, L.; Qiang, W.; Shunyi, W.; Shuran, G.; Wei, D.; Xinming, W.; Yajin, Q.; Yan, X.; Yanfeng, X.; Ying, W.; Zhiqi, S. |
| EPI_ISL_3237050                                                                                                                                                                                                                                                                                                                                                                                                                                                                                                                                                                                                                                                                                                                                                                                                                                                                                                                                                                                                                                                                                                                                                                                                                                                                                                                                                                                                                                                                                                                                                                                                                                                                                                                                                                     | King Faisal Specialist Hospital & Research Centre                                              | King Faisal Specialist Hospital & Research Centre                                                                                                                                                                              | Abeer N Alshukairi; Ashraf Dada; Mohamad K Al Hroub; Rayan Bawayan; Waseem A Al Mousa                                                                                                                                                                                                             |
| EPI_ISL_516940                                                                                                                                                                                                                                                                                                                                                                                                                                                                                                                                                                                                                                                                                                                                                                                                                                                                                                                                                                                                                                                                                                                                                                                                                                                                                                                                                                                                                                                                                                                                                                                                                                                                                                                                                                      | King Georges Medical University                                                                | CSIR-National Botanical Research Institute                                                                                                                                                                                     | Amita Jain; Babita Singh; Danish Nasar Khan; Hricha Mishra; Kishan Sahu; MLB Bhatt; Mehar H.Asif; Om Prakash; Priti Prasad; SK Barik; Samir V. Sawant; Shantanu Prakash; Sumit Kr. Bag; Suruchi Shukla                                                                                            |
| EPI_ISL_459886                                                                                                                                                                                                                                                                                                                                                                                                                                                                                                                                                                                                                                                                                                                                                                                                                                                                                                                                                                                                                                                                                                                                                                                                                                                                                                                                                                                                                                                                                                                                                                                                                                                                                                                                                                      | Kingston Health Sciences Center                                                                | Queen's Genomics Lab at Ongwanada (Q-GLO)                                                                                                                                                                                      | Ayub M; Colautti R; Evans GA; Guan H; Huang D; Hudson ML; Perez-Patrigeon S; Rustom N; Sheth P; Sjaarda CP; Soares CN; Wong H                                                                                                                                                                     |
| EPI_ISL_413021                                                                                                                                                                                                                                                                                                                                                                                                                                                                                                                                                                                                                                                                                                                                                                                                                                                                                                                                                                                                                                                                                                                                                                                                                                                                                                                                                                                                                                                                                                                                                                                                                                                                                                                                                                      | Klinik Hirslanden Zurich                                                                       | Institute of Medical Virology, University of Zurich                                                                                                                                                                            | Alexandra Trkola; Andrea Zbinden; Christian Ruef; Fiona Steiner; Gabriela Ziltener; John Huder; Jürg Böni; Maryam Zaheer; Michael Huber; Patrick Redli; Riccarda Capaul; Stefan Schmutz; Verena Kufner                                                                                            |
| EPI_ISL_1570755, EPI_ISL_1724467, EPI_ISL_1495782, EPI_ISL_2232709, EPI_ISL_2232717, EPI_ISL_2382046, EPI_ISL_3546597, EPI_ISL_5063374, EPI_ISL_6332665, EPI_ISL_6332808                                                                                                                                                                                                                                                                                                                                                                                                                                                                                                                                                                                                                                                                                                                                                                                                                                                                                                                                                                                                                                                                                                                                                                                                                                                                                                                                                                                                                                                                                                                                                                                                            | Klinikum Ernst von Bergmann gemeinnützige GmbH - stationärer Bereich                           | Robert Koch Institute                                                                                                                                                                                                          |                                                                                                                                                                                                                                                                                                   |
| see above                                                                                                                                                                                                                                                                                                                                                                                                                                                                                                                                                                                                                                                                                                                                                                                                                                                                                                                                                                                                                                                                                                                                                                                                                                                                                                                                                                                                                                                                                                                                                                                                                                                                                                                                                                           | Klinikum Wels-Grieskirchen                                                                     | Berghaler laboratory, CeMM Research Center for Molecular Medicine of the Austrian Academy of Sciences                                                                                                                          | Andreas Berghaler; Anna Schedl; Bekir Erguner; Benedikt Agerer; Christoph Bock; Fabian Amman; Jan Laine; Lukas Endler; Maelle Le Moing; Martin Senekowitsch; Matthew Thornton; Michael Schuster; Michelle Chan; Petr Triska; Thomas Penz                                                          |
| EPI_ISL_1732157, EPI_ISL_1259313, EPI_ISL_1360035, EPI_ISL_1843756, EPI_ISL_2259418, EPI_ISL_2259419, EPI_ISL_3692534, EPI_ISL_4505730, EPI_ISL_4505737, EPI_ISL_5106652, EPI_ISL_5136905, EPI_ISL_6775884, EPI_ISL_6775913, EPI_ISL_7373584                                                                                                                                                                                                                                                                                                                                                                                                                                                                                                                                                                                                                                                                                                                                                                                                                                                                                                                                                                                                                                                                                                                                                                                                                                                                                                                                                                                                                                                                                                                                        | Klinisch Laboratorium GZA                                                                      | Klinisch Laboratorium ZNA                                                                                                                                                                                                      | Verstrepen et al.                                                                                                                                                                                                                                                                                 |
| see above                                                                                                                                                                                                                                                                                                                                                                                                                                                                                                                                                                                                                                                                                                                                                                                                                                                                                                                                                                                                                                                                                                                                                                                                                                                                                                                                                                                                                                                                                                                                                                                                                                                                                                                                                                           | Klinisch Laboratorium ZNA                                                                      | Klinisch Laboratorium ZNA                                                                                                                                                                                                      | Verstrepen et al.                                                                                                                                                                                                                                                                                 |
| EPI_ISL_1064590, EPI_ISL_1305985                                                                                                                                                                                                                                                                                                                                                                                                                                                                                                                                                                                                                                                                                                                                                                                                                                                                                                                                                                                                                                                                                                                                                                                                                                                                                                                                                                                                                                                                                                                                                                                                                                                                                                                                                    | Klinik mikrobiologi                                                                            | The Public Health Agency of Sweden                                                                                                                                                                                             | Anna Risberg; Anna-Malin Linde; Carlo Berg; Karin Tegmark-Wisell; Maria Lind Karlberg; Mattias Haukland; Mia Brytting; Noura Walai; Oskar Karlsson Lindsjo; Petra Edquist; Petra Holmstrom; Reza Advani; Samuel Ohman; Sofia Stamouli                                                             |
| EPI_ISL_479823                                                                                                                                                                                                                                                                                                                                                                                                                                                                                                                                                                                                                                                                                                                                                                                                                                                                                                                                                                                                                                                                                                                                                                                                                                                                                                                                                                                                                                                                                                                                                                                                                                                                                                                                                                      | Klinisk mikrobiologi, Region Västerbotten                                                      | CBRN Defence and Security, Swedish Defence Research Agency                                                                                                                                                                     | Andreas Sjödin; Anna-Lena Johansson; Annika Allard; Annika Osterman; Caroline Ohrman; David Sundell; Emelie Näslund Salomonsson; Ingrid Dacklin; Jonas Näslund; Kerstin Myrtennäs; Linda Karlsson; Malin Granberg; Mats Forsman; Stina Bäckman                                                    |
| EPI_ISL_3183535                                                                                                                                                                                                                                                                                                                                                                                                                                                                                                                                                                                                                                                                                                                                                                                                                                                                                                                                                                                                                                                                                                                                                                                                                                                                                                                                                                                                                                                                                                                                                                                                                                                                                                                                                                     | Kochi Prefectural Institute of Public Health                                                   | Pathogen Genomics Center, National Institute of Infectious Diseases                                                                                                                                                            | Akihiko Tokaji; Hajime Kamiya; Kentaro Itokawa; Makoto Kuroda; Masanori Hashino; Motoi Suzuki; Rina Tanaka; Tsuyoshi Sekizuka                                                                                                                                                                     |
| EPI_ISL_3276269, EPI_ISL_3276278, EPI_ISL_3276307, EPI_ISL_3276308, EPI_ISL_3276309, EPI_ISL_3276311, EPI_ISL_3071988                                                                                                                                                                                                                                                                                                                                                                                                                                                                                                                                                                                                                                                                                                                                                                                                                                                                                                                                                                                                                                                                                                                                                                                                                                                                                                                                                                                                                                                                                                                                                                                                                                                               | Kochi Public Health and Environmental Science Research Institute                               | Kochi Public Health and Environmental Science Research Institute                                                                                                                                                               | Kentaro Itokawa; Makoto Kuroda; Masanori Hashino; Rina Tanaka; Tsuyoshi Sekizuka; Wataru Satou                                                                                                                                                                                                    |
| EPI_ISL_3276269, EPI_ISL_3276278, EPI_ISL_3276307, EPI_ISL_3276308, EPI_ISL_3276309, EPI_ISL_3276311                                                                                                                                                                                                                                                                                                                                                                                                                                                                                                                                                                                                                                                                                                                                                                                                                                                                                                                                                                                                                                                                                                                                                                                                                                                                                                                                                                                                                                                                                                                                                                                                                                                                                | Kodigehalli PHC                                                                                | inStem NCBS - INSACOG                                                                                                                                                                                                          | Uma Ramakrishnan Dasaradhi Palakodeti Aswin SaiNarain                                                                                                                                                                                                                                             |
| EPI_ISL_3183415, EPI_ISL_3183424, EPI_ISL_3183432, EPI_ISL_3197200, EPI_ISL_3197214, EPI_ISL_3197228, EPI_ISL_3197252, EPI_ISL_3197262, EPI_ISL_3197280, EPI_ISL_3183386, EPI_ISL_3183393, EPI_ISL_3183881, EPI_ISL_3183882, EPI_ISL_3183893, EPI_ISL_3183899, EPI_ISL_3183940                                                                                                                                                                                                                                                                                                                                                                                                                                                                                                                                                                                                                                                                                                                                                                                                                                                                                                                                                                                                                                                                                                                                                                                                                                                                                                                                                                                                                                                                                                      | Kuala Pilah District Health Office                                                             | Institute for Medical Research, Infectious Disease Research Centre, National Institutes of Health, Ministry of Health Malaysia                                                                                                 | Anasir MI; Kamel K; Mohd Zawawi Z; Ramly N; Robert F; Suppiah J; Thayan R                                                                                                                                                                                                                         |
| see above                                                                                                                                                                                                                                                                                                                                                                                                                                                                                                                                                                                                                                                                                                                                                                                                                                                                                                                                                                                                                                                                                                                                                                                                                                                                                                                                                                                                                                                                                                                                                                                                                                                                                                                                                                           | Kumamoto City Environmental Reserch Institute                                                  | Kumamoto City Environmental Reserch Institute                                                                                                                                                                                  | Kentaro Itokawa; Makoto Kuroda; Masanori Hashino; Mayumi Kadoguchi; Rina Tanaka; Tsuyoshi Sekizuka; Yuko Obata                                                                                                                                                                                    |
| see above                                                                                                                                                                                                                                                                                                                                                                                                                                                                                                                                                                                                                                                                                                                                                                                                                                                                                                                                                                                                                                                                                                                                                                                                                                                                                                                                                                                                                                                                                                                                                                                                                                                                                                                                                                           | Kumamoto City Environmental Reserch Institute                                                  | Pathogen Genomics Center, National Institute of Infectious Diseases                                                                                                                                                            | Kentaro Itokawa; Makoto Kuroda; Masanori Hashino; Rina Tanaka; Tsuyoshi Sekizuka                                                                                                                                                                                                                  |
| see above                                                                                                                                                                                                                                                                                                                                                                                                                                                                                                                                                                                                                                                                                                                                                                                                                                                                                                                                                                                                                                                                                                                                                                                                                                                                                                                                                                                                                                                                                                                                                                                                                                                                                                                                                                           | Kumamoto Prefectural Institute of Public-Health and Environmental Science                      | Kumamoto Prefectural Institute of Public-Health and Environmental Science                                                                                                                                                      | Kentaro Itokawa; Makoto Kuroda; Mami Sato; Masanori Hashino; Rika Maeda; Rina Tanaka; Tsuyoshi Sekizuka                                                                                                                                                                                           |
| EPI_ISL_539805, EPI_ISL_3183375, EPI_ISL_3183376, EPI_ISL_3183384, EPI_ISL_8108154                                                                                                                                                                                                                                                                                                                                                                                                                                                                                                                                                                                                                                                                                                                                                                                                                                                                                                                                                                                                                                                                                                                                                                                                                                                                                                                                                                                                                                                                                                                                                                                                                                                                                                  | Kwong Wah Hospital                                                                             | Hong Kong Department of Health                                                                                                                                                                                                 | Alan K.L. Tsang; Dominic N.C. Tsang; Edman T.K. Lam; Peter C.W. Yip; Rickjason C.W. Chan                                                                                                                                                                                                          |
| EPI_ISL_3183375, EPI_ISL_3183376, EPI_ISL_3183384, EPI_ISL_8108154                                                                                                                                                                                                                                                                                                                                                                                                                                                                                                                                                                                                                                                                                                                                                                                                                                                                                                                                                                                                                                                                                                                                                                                                                                                                                                                                                                                                                                                                                                                                                                                                                                                                                                                  | Kyoto Prefectural Institute Of Public Health And Environment                                   | Kyoto Prefectural Institute Of Public Health And Environment                                                                                                                                                                   | Akira Kotera; Kenji Konaka; Kentaro Itokawa; Makoto Kuroda; Masanori Hashino; Miki Tsuda; Nana Horikawa; Norio Asai; Rina Tanaka; Tsuyoshi Sekizuka; Yasushi Fujimoto; Yoshihiro Tanabe; Yoshiyuki Kawahara; Yuri Sakai                                                                           |

|                                                                                                                                                                                                                                                                                                                                                                                                                        |                                                                     |                                                                                                                     |                                                                                                                                                                                                                                                                                                                                                                                                                                                                                                                                                                                                                                                                                                                                                                                                                                                                                                                                                                                                                                                                                                                                                                                 |
|------------------------------------------------------------------------------------------------------------------------------------------------------------------------------------------------------------------------------------------------------------------------------------------------------------------------------------------------------------------------------------------------------------------------|---------------------------------------------------------------------|---------------------------------------------------------------------------------------------------------------------|---------------------------------------------------------------------------------------------------------------------------------------------------------------------------------------------------------------------------------------------------------------------------------------------------------------------------------------------------------------------------------------------------------------------------------------------------------------------------------------------------------------------------------------------------------------------------------------------------------------------------------------------------------------------------------------------------------------------------------------------------------------------------------------------------------------------------------------------------------------------------------------------------------------------------------------------------------------------------------------------------------------------------------------------------------------------------------------------------------------------------------------------------------------------------------|
| EPI_ISL_1516405,<br>EPI_ISL_1823814,<br>EPI_ISL_2018379                                                                                                                                                                                                                                                                                                                                                                | LA Office of Public Health Laboratories                             | Centers for Disease Control and Prevention Division of Viral Diseases, Pathogen Discovery                           | Alison Lauffer Halpin; Ben L. Rambo-Martin; Clinton R. Paden; Dakota Howard; Darlene Wagner; Dave Wentworth; Dhvani Batra; Jasmine Padilla; Justin Lee; Katie Dillon; Krista Queen; Kristen Kruipe; Kristine Lacek; Mark Burroughs; Matthew Schmerer; Mili Sheth; Peter Cook; Sam Shepard; Sarah Nobles; Shoshona Le; Suxiang Tong; Vivien Dugan; Yvette Unoarumhi                                                                                                                                                                                                                                                                                                                                                                                                                                                                                                                                                                                                                                                                                                                                                                                                              |
| EPI_ISL_1118195                                                                                                                                                                                                                                                                                                                                                                                                        | LAB ANALISI PO CARDARELLI CAMPOBASSO                                | Istituto Zooprofilattico Sperimentale dell'Abruzzo e Molise "G. Caporale"                                           | Ancora M; Calistri P; Cammà C; Curini V; Di Domenico M; Di Pasquale A; Felice V. Lorusso A; Mangone I; Marcacci M; Niro G; Puglia I; Rinaldi A; Savini G; Scialabba S; Scutelà M                                                                                                                                                                                                                                                                                                                                                                                                                                                                                                                                                                                                                                                                                                                                                                                                                                                                                                                                                                                                |
| EPI_ISL_4508303                                                                                                                                                                                                                                                                                                                                                                                                        | LAB Hamera Sarana Indonesia                                         | National Institute of Health Research and Development                                                               | Arie Ardiansyah Nugraha; Fajar Nur Sulistiyohadi; Hana Aparsi Pawestri; Hartanti Dian Ikawati; Kartika Dewi Puspa; Krisna Pangesti; Nelly Puspandari; Subangkit; Triyani Soekarso; Vivi Setiawaty                                                                                                                                                                                                                                                                                                                                                                                                                                                                                                                                                                                                                                                                                                                                                                                                                                                                                                                                                                               |
| EPI_ISL_6507391,<br>EPI_ISL_6507394                                                                                                                                                                                                                                                                                                                                                                                    | LABM BONHOURE                                                       | CERBA HealthCare                                                                                                    | Bénédicte Roquebert; Laura Verdurme; Sabine Trombert; Stéphanie Haim-Boukobza                                                                                                                                                                                                                                                                                                                                                                                                                                                                                                                                                                                                                                                                                                                                                                                                                                                                                                                                                                                                                                                                                                   |
| EPI_ISL_416500,<br>EPI_ISL_418234                                                                                                                                                                                                                                                                                                                                                                                      | LABM GH nord Essonne                                                | National Reference Center for Viruses of Respiratory Infections, Institut Pasteur, Paris                            | Angela Brisebarre; Christine Lambert; Etienne Simon-Lorière; Flora Donati; Marion Barbet; Maud Vanpeene; Mélanie Albert; Méline Bizard; Méline Albert; Sylvie Behillil; Sylvie van der Werf; Vincent Enouf                                                                                                                                                                                                                                                                                                                                                                                                                                                                                                                                                                                                                                                                                                                                                                                                                                                                                                                                                                      |
| EPI_ISL_6507491,<br>EPI_ISL_6567001                                                                                                                                                                                                                                                                                                                                                                                    | LABM KUATE                                                          | CERBA HealthCare                                                                                                    | Bénédicte Roquebert; Laura Verdurme; Sabine Trombert; Stéphanie Haim-Boukobza                                                                                                                                                                                                                                                                                                                                                                                                                                                                                                                                                                                                                                                                                                                                                                                                                                                                                                                                                                                                                                                                                                   |
| EPI_ISL_3234515,<br>EPI_ISL_3234638                                                                                                                                                                                                                                                                                                                                                                                    | LABO BIO DOC                                                        | CHU Purpan - Laboratoire de Virologie - Institut Fédératif de Biologie                                              | Bulach T.; Donnadiou C.; Izopet J.; Latour J.; Milhes M.; Nicot F.; Ranger N.; Salin G.; Tremeaux P.                                                                                                                                                                                                                                                                                                                                                                                                                                                                                                                                                                                                                                                                                                                                                                                                                                                                                                                                                                                                                                                                            |
| EPI_ISL_3230823                                                                                                                                                                                                                                                                                                                                                                                                        | LABOFFICE                                                           | CHU Poitiers                                                                                                        | Agnes BEBY-DEFAUX; Birama N'DIAYE; Caroline MICHAUD; Magali GARCIA; Manon PRAT; Maxime PICHON; Nicolas LEVEQUE; Valentin BON-BARET                                                                                                                                                                                                                                                                                                                                                                                                                                                                                                                                                                                                                                                                                                                                                                                                                                                                                                                                                                                                                                              |
| EPI_ISL_2122838                                                                                                                                                                                                                                                                                                                                                                                                        | LABOR CHEMNITZ Zentrum für Diagnostik am Klinikum Chemnitz          | Robert Koch Institute                                                                                               |                                                                                                                                                                                                                                                                                                                                                                                                                                                                                                                                                                                                                                                                                                                                                                                                                                                                                                                                                                                                                                                                                                                                                                                 |
| EPI_ISL_1354387                                                                                                                                                                                                                                                                                                                                                                                                        | LABOR CHEMNITZ - Zentrum für Diagnostik am Klinikum Chemnitz        | Robert Koch Institute                                                                                               |                                                                                                                                                                                                                                                                                                                                                                                                                                                                                                                                                                                                                                                                                                                                                                                                                                                                                                                                                                                                                                                                                                                                                                                 |
| EPI_ISL_6916931                                                                                                                                                                                                                                                                                                                                                                                                        | LABORATOIRE B2A EPINAL SAUT-LE-CERF                                 | CERBA HealthCare                                                                                                    | Bénédicte Roquebert; Laura Verdurme; Sabine Trombert; Stéphanie Haim-Boukobza                                                                                                                                                                                                                                                                                                                                                                                                                                                                                                                                                                                                                                                                                                                                                                                                                                                                                                                                                                                                                                                                                                   |
| EPI_ISL_3205696,<br>EPI_ISL_3206840,<br>EPI_ISL_3207268,<br>EPI_ISL_3207402                                                                                                                                                                                                                                                                                                                                            | LABORATOIRE BIOESTEREL                                              | CNR Virus des Infections Respiratoires - France SUD                                                                 | Antonin Bal; Bruno Lina; Gregory Destras; Gwendolynne Burfin; Hadrien Regue; Laurence Josset; Martine Valette; Quentin Semanas                                                                                                                                                                                                                                                                                                                                                                                                                                                                                                                                                                                                                                                                                                                                                                                                                                                                                                                                                                                                                                                  |
| EPI_ISL_3206820                                                                                                                                                                                                                                                                                                                                                                                                        | LABORATOIRE BIOGROUP                                                | CNR Virus des Infections Respiratoires - France SUD                                                                 | Antonin Bal; Bruno Lina; Gregory Destras; Gwendolynne Burfin; Hadrien Regue; Laurence Josset; Martine Valette; Quentin Semanas                                                                                                                                                                                                                                                                                                                                                                                                                                                                                                                                                                                                                                                                                                                                                                                                                                                                                                                                                                                                                                                  |
| EPI_ISL_3205640                                                                                                                                                                                                                                                                                                                                                                                                        | LABORATOIRE BOUVIER                                                 | CNR Virus des Infections Respiratoires - France SUD                                                                 | Antonin Bal; Bruno Lina; Gregory Destras; Gwendolynne Burfin; Hadrien Regue; Laurence Josset; Martine Valette; Quentin Semanas                                                                                                                                                                                                                                                                                                                                                                                                                                                                                                                                                                                                                                                                                                                                                                                                                                                                                                                                                                                                                                                  |
| EPI_ISL_3206480,<br>EPI_ISL_3206492                                                                                                                                                                                                                                                                                                                                                                                    | LABORATOIRE CERBALLIANCE PLT VILLON                                 | CNR Virus des Infections Respiratoires - France SUD                                                                 | Antonin Bal; Bruno Lina; Gregory Destras; Gwendolynne Burfin; Hadrien Regue; Laurence Josset; Martine Valette; Quentin Semanas                                                                                                                                                                                                                                                                                                                                                                                                                                                                                                                                                                                                                                                                                                                                                                                                                                                                                                                                                                                                                                                  |
| EPI_ISL_6050985                                                                                                                                                                                                                                                                                                                                                                                                        | LABORATOIRE DE LA CPAM DE PARIS                                     | CERBA HealthCare                                                                                                    | Bénédicte Roquebert; Laura Verdurme; Sabine Trombert; Stéphanie Haim-Boukobza                                                                                                                                                                                                                                                                                                                                                                                                                                                                                                                                                                                                                                                                                                                                                                                                                                                                                                                                                                                                                                                                                                   |
| EPI_ISL_3205561,<br>EPI_ISL_3207325,<br>EPI_ISL_3207326                                                                                                                                                                                                                                                                                                                                                                | LABORATOIRE DES CEDRES                                              | CNR Virus des Infections Respiratoires - France SUD                                                                 | Antonin Bal; Bruno Lina; Gregory Destras; Gwendolynne Burfin; Hadrien Regue; Laurence Josset; Martine Valette; Quentin Semanas                                                                                                                                                                                                                                                                                                                                                                                                                                                                                                                                                                                                                                                                                                                                                                                                                                                                                                                                                                                                                                                  |
| EPI_ISL_3234512                                                                                                                                                                                                                                                                                                                                                                                                        | LABORATOIRE GCS INTER HOSPITALIER                                   | CHU Purpan - Laboratoire de Virologie - Institut Fédératif de Biologie                                              | Bulach T.; Donnadiou C.; Izopet J.; Latour J.; Milhes M.; Nicot F.; Ranger N.; Salin G.; Tremeaux P.                                                                                                                                                                                                                                                                                                                                                                                                                                                                                                                                                                                                                                                                                                                                                                                                                                                                                                                                                                                                                                                                            |
| EPI_ISL_3205522,<br>EPI_ISL_3205528,<br>EPI_ISL_3206218                                                                                                                                                                                                                                                                                                                                                                | LABORATOIRE UNILIANS DECINES                                        | CNR Virus des Infections Respiratoires - France SUD                                                                 | Antonin Bal; Bruno Lina; Gregory Destras; Gwendolynne Burfin; Hadrien Regue; Laurence Josset; Martine Valette; Quentin Semanas                                                                                                                                                                                                                                                                                                                                                                                                                                                                                                                                                                                                                                                                                                                                                                                                                                                                                                                                                                                                                                                  |
| EPI_ISL_3207041,<br>EPI_ISL_3207052,<br>EPI_ISL_3207114                                                                                                                                                                                                                                                                                                                                                                | LABORATOIRE d'ANALYSES de BIOLOGIE MEDICALES                        | CNR Virus des Infections Respiratoires - France SUD                                                                 | Antonin Bal; Bruno Lina; Gregory Destras; Gwendolynne Burfin; Hadrien Regue; Laurence Josset; Martine Valette; Quentin Semanas                                                                                                                                                                                                                                                                                                                                                                                                                                                                                                                                                                                                                                                                                                                                                                                                                                                                                                                                                                                                                                                  |
| EPI_ISL_2502740                                                                                                                                                                                                                                                                                                                                                                                                        | LABORATORIO CLINICO LABIN                                           | Incienza, Instituto Costarricense de Investigación y Enseñanza en NutriciOn y Salud                                 | Adriana Godínez; Claudio Soto-Garita; Estela Cordero; Francisco Duarte; Hebleen Porras; Jose Luis Vargas; Joselyn Prado & Pei Chan; Mariela Gutierrez; Melany CalderOn                                                                                                                                                                                                                                                                                                                                                                                                                                                                                                                                                                                                                                                                                                                                                                                                                                                                                                                                                                                                          |
| EPI_ISL_2674282                                                                                                                                                                                                                                                                                                                                                                                                        | LABORATORIO CONTINENTAL                                             | Instituto Nacional de Salud- Dirección de Investigación en Salud Pública                                            | Carlos Franco-Muñoz; Carmen Osorio; Diana Malo; Diego A. Álvarez-Díaz; Diego Andrés Prada; Gerardo Santamaría; Hector Alejandro Ruiz-Moreno; Jhonatan Reales-González; Jorge Rivera; Juan Camilo Martínez; Julian Naizaque; Katherine Laiton-Donato; Lisseth Pardo; Magdalena Wiesner; Marcela Mercado-Reyes; Maria T. Herrera-Sepúlveda; Marta Lopez Blanco; Martha Lucia Ospina Martínez; Paola Rojas; Sergio Gomez; Sheryll Corchuelo; Angela Alarcon Cruz                                                                                                                                                                                                                                                                                                                                                                                                                                                                                                                                                                                                                                                                                                                   |
| EPI_ISL_1795350                                                                                                                                                                                                                                                                                                                                                                                                        | LABORATORIO DR PAULO EMILIO DALESSANDRO PINDAMONHANGABA             | Instituto Butantan / ESALQ- Piracicaba                                                                              | Antonio Jorge Martins; Bianca Cechetto Carlos; Mendelics; Bibiana Santos; Claudia Renata dos Santos Barros; David Schlesinger; Hemocentro Ribeirão Preto; Simone Kashima; Debora Botequiu Moretti; Centro de Genômica Funcional da ESALQ; Luiz Lehmann Coutinho; Dimas Tadeu Covas; Elaine Cristina Marqueze; Elaine Vieira dos Santos; Elisângela Chicaroni Mattos; Érika Freitas; Evandra Strazza Rodrigues; Felipe Allan da Silva da Costa; Flávia Aburjalile; Guilherme Targino Valente; Heidge Fukumasa; USP-Botucatu: Rejane Maria Tommasini Grotto; Instituto Butantan: Alexander Roberto Precioso; Jayme A. Souza-Neto; Jessica Cristina Chagas Lesbon; José Salvatore Leister Patané; João Paulo Kitajima; Luiz Carlos Junior de Alcantara; Maria Carolina Elias; Marta Giovanetti; Patricia Akemi Assato; Rafael dos Santos Bezerra; Raquel de Lello Rocha Campos Cassano. NGS Soluções Genômicas; Pilar Drummond Sampaio Corrêa Mariani. FZEA-USP Pirassununga: Mirele Daiana Poleti; Raul Machado Neto; Ricardo Augusto Brassaloti; Ricardo Haddad; Rodrigo Tocantins Calado.; Sandra Coccuzzo Sampaio; Svetoslav Nanev Slavov; Wagner Fonseca; Vincent Louis Viala |
| EPI_ISL_1627702,<br>EPI_ISL_1746637                                                                                                                                                                                                                                                                                                                                                                                    | LABORATORIUM BADAN KLINICZNYCH WSSE w OPOLU                         | 1. National Institute of Public Health - National Institute of Hygiene; 2. Eurofins Genomics Europe Sequencing GmbH | ECDC COVID-19 WGS support team; Eurofins Genomics Europe Sequencing Team; Gierczyński Rafał; Sadkowska-Todys Małgorzata; Wolkowicz Tomasz; Zacharczuk Katarzyna                                                                                                                                                                                                                                                                                                                                                                                                                                                                                                                                                                                                                                                                                                                                                                                                                                                                                                                                                                                                                 |
| EPI_ISL_6721424                                                                                                                                                                                                                                                                                                                                                                                                        | LACEN - Laboratório Central de Saúde Pública de Pernambuco          | Evandro Chagas Institute                                                                                            | Delana Andreza Melo Bezerra; Dielle Monteiro Teixeira; Jedson Ferreira Cardoso; Jessylene de Almeida Ferreira; Kenny da Costa Pinheiro; Luana Soares Barbagelata; Luana da Silva Soares; Mirleide Cordeiro dos Santos; Patrícia dos Santos Lobo; Rayssa Layna da Silva Bedran; Sandro Patroca da Silva                                                                                                                                                                                                                                                                                                                                                                                                                                                                                                                                                                                                                                                                                                                                                                                                                                                                          |
| EPI_ISL_6721396                                                                                                                                                                                                                                                                                                                                                                                                        | LACEN - Laboratório Central de Saúde Pública do Rio Grande do Norte | Evandro Chagas Institute                                                                                            | Delana Andreza Melo Bezerra; Dielle Monteiro Teixeira; Jedson Ferreira Cardoso; Jessylene de Almeida Ferreira; Kenny da Costa Pinheiro; Luana Soares Barbagelata; Luana da Silva Soares; Mirleide Cordeiro dos Santos; Patrícia dos Santos Lobo; Rayssa Layna da Silva Bedran; Sandro Patroca da Silva                                                                                                                                                                                                                                                                                                                                                                                                                                                                                                                                                                                                                                                                                                                                                                                                                                                                          |
| EPI_ISL_5538625                                                                                                                                                                                                                                                                                                                                                                                                        | LACEN do Distrito Federal                                           | Instituto Adolfo Lutz, Interdisciplinary Procedures Center, Strategic Laboratory                                    | Caio Vinicius Dias Lopes; Claudia Regina Gonçalves; Claudio Tavares Sacchi; Karoline Rodrigues Campos; Leonardo Tadeu de Araujo; Marlon Benedito Nascimento Santos                                                                                                                                                                                                                                                                                                                                                                                                                                                                                                                                                                                                                                                                                                                                                                                                                                                                                                                                                                                                              |
| EPI_ISL_985310                                                                                                                                                                                                                                                                                                                                                                                                         | LACEN do Estado de Goias                                            | Instituto Adolfo Lutz, Interdisciplinary Procedures Center, Strategic Laboratory                                    | Claudia Regina Gonçalves; Claudio Tavares Sacchi; Erica Valessa Ramos Gomes; Karoline Rodrigues Campos                                                                                                                                                                                                                                                                                                                                                                                                                                                                                                                                                                                                                                                                                                                                                                                                                                                                                                                                                                                                                                                                          |
| EPI_ISL_2958889                                                                                                                                                                                                                                                                                                                                                                                                        | LACEN do Estado de Mato Grosso                                      | Instituto Adolfo Lutz, Interdisciplinary Procedures Center, Strategic Laboratory                                    | Caio Vinicius Dias Lopes; Claudia Regina Gonçalves; Claudio Tavares Sacchi; Erica Valessa Ramos Gomes; Karoline Rodrigues Campos                                                                                                                                                                                                                                                                                                                                                                                                                                                                                                                                                                                                                                                                                                                                                                                                                                                                                                                                                                                                                                                |
| EPI_ISL_3671914,<br>EPI_ISL_3691368,<br>EPI_ISL_5924228                                                                                                                                                                                                                                                                                                                                                                | LACEN do Estado do Mato Grosso do Sul                               | Instituto Adolfo Lutz, Interdisciplinary Procedures Center, Strategic Laboratory                                    | Caio Vinicius Dias Lopes; Claudia Regina Gonçalves; Claudio Tavares Sacchi; Karoline Rodrigues Campos; Leonardo Tadeu de Araujo; Marlon Benedito Nascimento Santos; Marlon Benedito Nascimento Santos                                                                                                                                                                                                                                                                                                                                                                                                                                                                                                                                                                                                                                                                                                                                                                                                                                                                                                                                                                           |
| EPI_ISL_1040851                                                                                                                                                                                                                                                                                                                                                                                                        | LACEN do Mato Grosso do Sul                                         | Instituto Adolfo Lutz, Interdisciplinary Procedures Center, Strategic Laboratory                                    | Claudia Regina Gonçalves; Claudio Tavares Sacchi; Erica Valessa Ramos Gomes; Karoline Rodrigues Campos                                                                                                                                                                                                                                                                                                                                                                                                                                                                                                                                                                                                                                                                                                                                                                                                                                                                                                                                                                                                                                                                          |
| EPI_ISL_6573811                                                                                                                                                                                                                                                                                                                                                                                                        | LACEN/PE                                                            | WallauLab on behalf of Fiocruz COVID-19 Genomic Surveillance Network                                                | Alexandre Freitas da Silva; Antonio Marinho da Silva Neto; Cassia Docena; Constância Flávia Junqueira Ayres; Filipe Zimmer Dezordi; Gabriel Luz Wallau; Gustavo Barbosa de Lima; Lais Ceschini Machado; Lilian Carolyn Amorim Silva; Marcelo Henrique dos Santos Paiva; Matheus Filgueira Bezerra; Sinval Pinto Brandão Filho                                                                                                                                                                                                                                                                                                                                                                                                                                                                                                                                                                                                                                                                                                                                                                                                                                                   |
| EPI_ISL_3246152, EPI_ISL_3246167, EPI_ISL_3246172, EPI_ISL_3261062, EPI_ISL_3261066, EPI_ISL_3261068, EPI_ISL_3261069, EPI_ISL_3261078, EPI_ISL_3261094, EPI_ISL_3261101, EPI_ISL_3261102, EPI_ISL_3267924, EPI_ISL_3267926, EPI_ISL_3267938, EPI_ISL_3267940, EPI_ISL_3267953, EPI_ISL_3267964, EPI_ISL_3267975, EPI_ISL_3267977, EPI_ISL_3267978, EPI_ISL_3267981, EPI_ISL_3267993, EPI_ISL_3267997, EPI_ISL_3268023 | see above                                                           | LATE - Laboratório de Técnicas Especiais - Hospital Israelita Albert Einstein                                       | Alexandre Hideaki Takara; Ana Paula Moreira Salles; Anelise da Silva Santos; Deyvid Amgarten; Erick Gustavo Dorlass; Fernanda de Mello Malta; João Renato Rebelo Pinho; Marcio Anunciacao Menezes; Pedro Henrique Sebe Rodrigues; Raquel Riyuzo                                                                                                                                                                                                                                                                                                                                                                                                                                                                                                                                                                                                                                                                                                                                                                                                                                                                                                                                 |
| EPI_ISL_5914938                                                                                                                                                                                                                                                                                                                                                                                                        | LBM Belleville Pyrenees                                             | CERBA HealthCare                                                                                                    | Bénédicte Roquebert; Laura Verdurme; Sabine Trombert; Stéphanie Haim-Boukobza                                                                                                                                                                                                                                                                                                                                                                                                                                                                                                                                                                                                                                                                                                                                                                                                                                                                                                                                                                                                                                                                                                   |
| EPI_ISL_4824510,<br>EPI_ISL_4824680,<br>EPI_ISL_5914907,<br>EPI_ISL_6316438                                                                                                                                                                                                                                                                                                                                            | LBM Porte de la Chapelle                                            | CERBA HealthCare                                                                                                    | Bénédicte Roquebert; Laura Verdurme; Sabine Trombert; Stéphanie Haim-Boukobza                                                                                                                                                                                                                                                                                                                                                                                                                                                                                                                                                                                                                                                                                                                                                                                                                                                                                                                                                                                                                                                                                                   |
| EPI_ISL_5588265                                                                                                                                                                                                                                                                                                                                                                                                        | LBM St Isidore                                                      | CERBA HealthCare                                                                                                    | Bénédicte Roquebert; Laura Verdurme; Sabine Trombert; Stéphanie Haim-Boukobza                                                                                                                                                                                                                                                                                                                                                                                                                                                                                                                                                                                                                                                                                                                                                                                                                                                                                                                                                                                                                                                                                                   |
| EPI_ISL_4824569                                                                                                                                                                                                                                                                                                                                                                                                        | LBM Villetaneuse                                                    | CERBA HealthCare                                                                                                    | Bénédicte Roquebert; Laura Verdurme; Sabine Trombert; Stéphanie Haim-Boukobza                                                                                                                                                                                                                                                                                                                                                                                                                                                                                                                                                                                                                                                                                                                                                                                                                                                                                                                                                                                                                                                                                                   |



|                                                                                                                                                                                                                             |                          |                                                               |                                                                                                                                                                                                                                                                                                                                                                                                                                                               |
|-----------------------------------------------------------------------------------------------------------------------------------------------------------------------------------------------------------------------------|--------------------------|---------------------------------------------------------------|---------------------------------------------------------------------------------------------------------------------------------------------------------------------------------------------------------------------------------------------------------------------------------------------------------------------------------------------------------------------------------------------------------------------------------------------------------------|
| EPI_ISL_3459402                                                                                                                                                                                                             | LDSP CUNDINAMARCA        | Instituto Nacional de Salud                                   | Carlos Franco-Muñoz; Carmen Osorio; Diana Malo; Diego A. Álvarez-Díaz; Diego Andrés Prada; Gerardo Santamaría; Hector Alejandro Ruiz-Moreno; Jhonnatan Reales-González; Jorge Rivera; Juan Camilo Martínez; Julian Naizaque; Katherine Laiton-Donato; Liseth Pardo; Magdalena Wiesner; Marcela Mercado-Reyes; Maria T. Herrera-Sepúlveda; Marta Lopez Blanco; Martha Lucia Ospina Martínez; Paola Rojas; Sergio Gomez; Sheryll Corchuelo; Ángela Alarcon Cruz |
| EPI_ISL_2861187,<br>EPI_ISL_3460058,<br>EPI_ISL_4199211                                                                                                                                                                     | LESP Aguascalientes      | Instituto de Diagnostico y Referencia Epidemiologicos (INDRE) | Abril Rodriguez-Maldonado; Ariadna Medina-Benitez; Claudia Wong-Arambula; Ernesto Ramirez-Gonzalez.; Gisela Barrera-Badillo; Irma Lopez-Martinez; Joaquin Quiroz-Mercado; Lucia Hernandez-Rivas; Maribel Gonzalez-Villa; Natividad Cruz-Ortiz; Sergio Rangel-Guerrero; Tatiana Nunez-Garcia; Vanessa Rivero-Arredondo                                                                                                                                         |
| EPI_ISL_5428246,<br>EPI_ISL_6570821,<br>EPI_ISL_6570872,<br>EPI_ISL_6810091                                                                                                                                                 | LESP Baja California     | Instituto de Diagnostico y Referencia Epidemiologicos (INDRE) | Abril Rodriguez-Maldonado; Ariadna Medina-Benitez; Claudia Wong-Arambula; Ernesto Ramirez-Gonzalez.; Fernando Gonzalez-Dominguez; Gisela Barrera-Badillo; Irma Lopez-Martinez; Joaquin Quiroz-Mercado; Lucia Hernandez-Rivas; Maribel Gonzalez-Villa; Natividad Cruz-Ortiz; Sergio Rangel-Guerrero; Tatiana Nunez-Garcia; Vanessa Rivero-Arredondo                                                                                                            |
| EPI_ISL_1857225,<br>EPI_ISL_2139913,<br>EPI_ISL_3033410,<br>EPI_ISL_3265433,<br>EPI_ISL_3265522                                                                                                                             | LESP Baja California Sur | Instituto de Diagnostico y Referencia Epidemiologicos (INDRE) | Abril Rodriguez-Maldonado; Ariadna Medina-Benitez; Claudia Wong-Arambula; Ernesto Ramirez-Gonzalez.; Gisela Barrera-Badillo; Irma Lopez-Martinez; Joaquin Quiroz-Mercado; Lucia Hernandez-Rivas; Maribel Gonzalez-Villa; Natividad Cruz-Ortiz; Sergio Rangel-Guerrero; Tatiana Nunez-Garcia; Vanessa Rivero-Arredondo                                                                                                                                         |
| EPI_ISL_2340887,<br>EPI_ISL_3265563,<br>EPI_ISL_4298902,<br>EPI_ISL_4602959,<br>EPI_ISL_6097886                                                                                                                             | LESP Campeche            | Instituto de Diagnostico y Referencia Epidemiologicos (INDRE) | Abril Rodriguez-Maldonado; Ariadna Medina-Benitez; Claudia Wong-Arambula; Ernesto Ramirez-Gonzalez.; Fernando Gonzalez-Dominguez; Gisela Barrera-Badillo; Irma Lopez-Martinez; Joaquin Quiroz-Mercado; Lucia Hernandez-Rivas; Maribel Gonzalez-Villa; Natividad Cruz-Ortiz; Sergio Rangel-Guerrero; Tatiana Nunez-Garcia; Vanessa Rivero-Arredondo                                                                                                            |
| EPI_ISL_2158230,<br>EPI_ISL_4603231                                                                                                                                                                                         | LESP Chiapas             | Instituto de Diagnostico y Referencia Epidemiologicos (INDRE) | Abril Rodriguez-Maldonado; Ariadna Medina-Benitez; Claudia Wong-Arambula; Ernesto Ramirez-Gonzalez.; Fernando Gonzalez-Dominguez; Gisela Barrera-Badillo; Irma Lopez-Martinez; Joaquin Quiroz-Mercado; Lucia Hernandez-Rivas; Maribel Gonzalez-Villa; Natividad Cruz-Ortiz; Sergio Rangel-Guerrero; Tatiana Nunez-Garcia; Vanessa Rivero-Arredondo                                                                                                            |
| EPI_ISL_1504087                                                                                                                                                                                                             | LESP Chihuahua           | Instituto de Diagnostico y Referencia Epidemiologicos (INDRE) | Abril Rodriguez-Maldonado; Ariadna Medina-Benitez; Claudia Wong-Arambula; Ernesto Ramirez-Gonzalez.; Gisela Barrera-Badillo; Irma Lopez-Martinez; Joaquin Quiroz-Mercado; Lucia Hernandez-Rivas; Natividad Cruz-Ortiz; Sergio Rangel-Guerrero; Tatiana Nunez-Garcia; Vanessa Rivero-Arredondo                                                                                                                                                                 |
| EPI_ISL_1651899,<br>EPI_ISL_2966400,<br>EPI_ISL_3265610                                                                                                                                                                     | LESP Ciudad de Mexico    | Instituto de Diagnostico y Referencia Epidemiologicos (INDRE) | Abril Rodriguez-Maldonado; Ariadna Medina-Benitez; Claudia Wong-Arambula; Ernesto Ramirez-Gonzalez.; Gisela Barrera-Badillo; Irma Lopez-Martinez; Joaquin Quiroz-Mercado; Lucia Hernandez-Rivas; Maribel Gonzalez-Villa; Natividad Cruz-Ortiz; Sergio Rangel-Guerrero; Tatiana Nunez-Garcia; Vanessa Rivero-Arredondo                                                                                                                                         |
| EPI_ISL_1365664                                                                                                                                                                                                             | LESP Coahuila            | Instituto de Diagnostico y Referencia Epidemiologicos (INDRE) | Abril Rodriguez-Maldonado; Ariadna Medina-Benitez; Claudia Wong-Arambula; Ernesto Ramirez-Gonzalez.; Gisela Barrera-Badillo; Irma Lopez-Martinez; Joaquin Quiroz-Mercado; Lucia Hernandez-Rivas; Natividad Cruz-Ortiz; Sergio Rangel-Guerrero; Tatiana Nunez-Garcia; Vanessa Rivero-Arredondo                                                                                                                                                                 |
| EPI_ISL_5428271                                                                                                                                                                                                             | LESP Colima              | Instituto de Diagnostico y Referencia Epidemiologicos (INDRE) | Abril Rodriguez-Maldonado; Ariadna Medina-Benitez; Claudia Wong-Arambula; Ernesto Ramirez-Gonzalez.; Fernando Gonzalez-Dominguez; Gisela Barrera-Badillo; Irma Lopez-Martinez; Joaquin Quiroz-Mercado; Lucia Hernandez-Rivas; Maribel Gonzalez-Villa; Natividad Cruz-Ortiz; Sergio Rangel-Guerrero; Tatiana Nunez-Garcia; Vanessa Rivero-Arredondo                                                                                                            |
| EPI_ISL_3265511                                                                                                                                                                                                             | LESP Durango             | Instituto de Diagnostico y Referencia Epidemiologicos (INDRE) | Abril Rodriguez-Maldonado; Ariadna Medina-Benitez; Claudia Wong-Arambula; Ernesto Ramirez-Gonzalez.; Gisela Barrera-Badillo; Irma Lopez-Martinez; Joaquin Quiroz-Mercado; Lucia Hernandez-Rivas; Maribel Gonzalez-Villa; Natividad Cruz-Ortiz; Sergio Rangel-Guerrero; Tatiana Nunez-Garcia; Vanessa Rivero-Arredondo                                                                                                                                         |
| EPI_ISL_3265396,<br>EPI_ISL_3265543,<br>EPI_ISL_3265632                                                                                                                                                                     | LESP Estado de Mexico    | Instituto de Diagnostico y Referencia Epidemiologicos (INDRE) | Abril Rodriguez-Maldonado; Ariadna Medina-Benitez; Claudia Wong-Arambula; Ernesto Ramirez-Gonzalez.; Gisela Barrera-Badillo; Irma Lopez-Martinez; Joaquin Quiroz-Mercado; Lucia Hernandez-Rivas; Maribel Gonzalez-Villa; Natividad Cruz-Ortiz; Sergio Rangel-Guerrero; Tatiana Nunez-Garcia; Vanessa Rivero-Arredondo                                                                                                                                         |
| EPI_ISL_2663385, EPI_ISL_3460060, EPI_ISL_3460063, EPI_ISL_3923901, EPI_ISL_4298705, EPI_ISL_4918396, EPI_ISL_6097859, EPI_ISL_6124048, EPI_ISL_6124049                                                                     | LESP Guanajuato          | Instituto de Diagnostico y Referencia Epidemiologicos (INDRE) | Abril Rodriguez-Maldonado; Ariadna Medina-Benitez; Claudia Wong-Arambula; Ernesto Ramirez-Gonzalez.; Fernando Gonzalez-Dominguez; Gisela Barrera-Badillo; Irma Lopez-Martinez; Joaquin Quiroz-Mercado; Lucia Hernandez-Rivas; Maribel Gonzalez-Villa; Natividad Cruz-Ortiz; Sergio Rangel-Guerrero; Tatiana Nunez-Garcia; Vanessa Rivero-Arredondo                                                                                                            |
| see above                                                                                                                                                                                                                   | LESP Guerrero            | Instituto de Diagnostico y Referencia Epidemiologicos (INDRE) | Abril Rodriguez-Maldonado; Ariadna Medina-Benitez; Claudia Wong-Arambula; Ernesto Ramirez-Gonzalez.; Gisela Barrera-Badillo; Irma Lopez-Martinez; Joaquin Quiroz-Mercado; Lucia Hernandez-Rivas; Natividad Cruz-Ortiz; Sergio Rangel-Guerrero; Tatiana Nunez-Garcia; Vanessa Rivero-Arredondo                                                                                                                                                                 |
| EPI_ISL_2663360,<br>EPI_ISL_5428303,<br>EPI_ISL_6097793                                                                                                                                                                     | LESP Hidalgo             | Instituto de Diagnostico y Referencia Epidemiologicos (INDRE) | Abril Rodriguez-Maldonado; Ariadna Medina-Benitez; Claudia Wong-Arambula; Ernesto Ramirez-Gonzalez.; Fernando Gonzalez-Dominguez; Gisela Barrera-Badillo; Irma Lopez-Martinez; Joaquin Quiroz-Mercado; Lucia Hernandez-Rivas; Maribel Gonzalez-Villa; Natividad Cruz-Ortiz; Sergio Rangel-Guerrero; Tatiana Nunez-Garcia; Vanessa Rivero-Arredondo                                                                                                            |
| EPI_ISL_1821186,<br>EPI_ISL_3459929,<br>EPI_ISL_4602989,<br>EPI_ISL_4602994,<br>EPI_ISL_4603216,<br>EPI_ISL_6571041                                                                                                         | LESP Jalisco             | Instituto de Diagnostico y Referencia Epidemiologicos (INDRE) | Abril Rodriguez-Maldonado; Ariadna Medina-Benitez; Claudia Wong-Arambula; Ernesto Ramirez-Gonzalez.; Fernando Gonzalez-Dominguez; Gisela Barrera-Badillo; Irma Lopez-Martinez; Joaquin Quiroz-Mercado; Lucia Hernandez-Rivas; Maribel Gonzalez-Villa; Natividad Cruz-Ortiz; Sergio Rangel-Guerrero; Tatiana Nunez-Garcia; Vanessa Rivero-Arredondo                                                                                                            |
| EPI_ISL_3460133,<br>EPI_ISL_3924037,<br>EPI_ISL_6097777                                                                                                                                                                     | LESP Mexico City         | Instituto de Diagnostico y Referencia Epidemiologicos (INDRE) | Abril Rodriguez-Maldonado; Ariadna Medina-Benitez; Claudia Wong-Arambula; Ernesto Ramirez-Gonzalez.; Fernando Gonzalez-Dominguez; Gisela Barrera-Badillo; Irma Lopez-Martinez; Joaquin Quiroz-Mercado; Lucia Hernandez-Rivas; Maribel Gonzalez-Villa; Natividad Cruz-Ortiz; Sergio Rangel-Guerrero; Tatiana Nunez-Garcia; Vanessa Rivero-Arredondo                                                                                                            |
| EPI_ISL_5428206                                                                                                                                                                                                             | LESP Michoacan           | Instituto de Diagnostico y Referencia Epidemiologicos (INDRE) | Abril Rodriguez-Maldonado; Ariadna Medina-Benitez; Claudia Wong-Arambula; Ernesto Ramirez-Gonzalez.; Fernando Gonzalez-Dominguez; Gisela Barrera-Badillo; Irma Lopez-Martinez; Joaquin Quiroz-Mercado; Lucia Hernandez-Rivas; Maribel Gonzalez-Villa; Natividad Cruz-Ortiz; Sergio Rangel-Guerrero; Tatiana Nunez-Garcia; Vanessa Rivero-Arredondo                                                                                                            |
| EPI_ISL_1651269,<br>EPI_ISL_2158157,<br>EPI_ISL_3923892,<br>EPI_ISL_5428173                                                                                                                                                 | LESP Morelos             | Instituto de Diagnostico y Referencia Epidemiologicos (INDRE) | Abril Rodriguez-Maldonado; Ariadna Medina-Benitez; Claudia Wong-Arambula; Ernesto Ramirez-Gonzalez.; Fernando Gonzalez-Dominguez; Gisela Barrera-Badillo; Irma Lopez-Martinez; Joaquin Quiroz-Mercado; Lucia Hernandez-Rivas; Maribel Gonzalez-Villa; Natividad Cruz-Ortiz; Sergio Rangel-Guerrero; Tatiana Nunez-Garcia; Vanessa Rivero-Arredondo                                                                                                            |
| EPI_ISL_1366696,<br>EPI_ISL_2861163,<br>EPI_ISL_6097725                                                                                                                                                                     | LESP Nuevo Leon          | Instituto de Diagnostico y Referencia Epidemiologicos (INDRE) | Abril Rodriguez-Maldonado; Ariadna Medina-Benitez; Claudia Wong-Arambula; Ernesto Ramirez-Gonzalez.; Fernando Gonzalez-Dominguez; Gisela Barrera-Badillo; Irma Lopez-Martinez; Joaquin Quiroz-Mercado; Lucia Hernandez-Rivas; Maribel Gonzalez-Villa; Natividad Cruz-Ortiz; Sergio Rangel-Guerrero; Tatiana Nunez-Garcia; Vanessa Rivero-Arredondo                                                                                                            |
| EPI_ISL_1424022, EPI_ISL_1821135, EPI_ISL_2157313, EPI_ISL_2495955, EPI_ISL_3046093, EPI_ISL_3046094, EPI_ISL_3769013, EPI_ISL_4199395, EPI_ISL_4298815, EPI_ISL_4603088, EPI_ISL_5686827                                   | LESP Queretaro           | Instituto de Diagnostico y Referencia Epidemiologicos (INDRE) | Abril Rodriguez-Maldonado; Ariadna Medina-Benitez; Claudia Wong-Arambula; Ernesto Ramirez-Gonzalez.; Fernando Gonzalez-Dominguez; Gisela Barrera-Badillo; Irma Lopez-Martinez; Joaquin Quiroz-Mercado; Lucia Hernandez-Rivas; Maribel Gonzalez-Villa; Natividad Cruz-Ortiz; Sergio Rangel-Guerrero; Tatiana Nunez-Garcia; Vanessa Rivero-Arredondo                                                                                                            |
| EPI_ISL_2545694                                                                                                                                                                                                             | LESP Quintana Roo        | Instituto de Diagnostico y Referencia Epidemiologicos (INDRE) | Abril Rodriguez-Maldonado; Ariadna Medina-Benitez; Claudia Wong-Arambula; Ernesto Ramirez-Gonzalez.; Gisela Barrera-Badillo; Irma Lopez-Martinez; Joaquin Quiroz-Mercado; Lucia Hernandez-Rivas; Natividad Cruz-Ortiz; Sergio Rangel-Guerrero; Tatiana Nunez-Garcia; Vanessa Rivero-Arredondo                                                                                                                                                                 |
| EPI_ISL_1483042,<br>EPI_ISL_3265540                                                                                                                                                                                         | LESP Sinaloa             | Instituto de Diagnostico y Referencia Epidemiologicos (INDRE) | Abril Rodriguez-Maldonado; Ariadna Medina-Benitez; Claudia Wong-Arambula; Ernesto Ramirez-Gonzalez.; Gisela Barrera-Badillo; Irma Lopez-Martinez; Joaquin Quiroz-Mercado; Lucia Hernandez-Rivas; Maribel Gonzalez-Villa; Natividad Cruz-Ortiz; Sergio Rangel-Guerrero; Tatiana Nunez-Garcia; Vanessa Rivero-Arredondo                                                                                                                                         |
| EPI_ISL_1821128,<br>EPI_ISL_3265452,<br>EPI_ISL_3265454,<br>EPI_ISL_3265571,<br>EPI_ISL_4298777,<br>EPI_ISL_6570937                                                                                                         | LESP Sonora              | Instituto de Diagnostico y Referencia Epidemiologicos (INDRE) | Abril Rodriguez-Maldonado; Ariadna Medina-Benitez; Claudia Wong-Arambula; Ernesto Ramirez-Gonzalez.; Fernando Gonzalez-Dominguez; Gisela Barrera-Badillo; Irma Lopez-Martinez; Joaquin Quiroz-Mercado; Lucia Hernandez-Rivas; Maribel Gonzalez-Villa; Natividad Cruz-Ortiz; Sergio Rangel-Guerrero; Tatiana Nunez-Garcia; Vanessa Rivero-Arredondo                                                                                                            |
| EPI_ISL_2778984, EPI_ISL_2859045, EPI_ISL_2859092, EPI_ISL_2859098, EPI_ISL_2861190, EPI_ISL_2920721, EPI_ISL_3459949, EPI_ISL_3769126, EPI_ISL_5428137, EPI_ISL_5686978, EPI_ISL_5686984, EPI_ISL_5687003, EPI_ISL_6097630 | LESP Tabasco             | Instituto de Diagnostico y Referencia Epidemiologicos (INDRE) | Abril Rodriguez-Maldonado; Ariadna Medina-Benitez; Claudia Wong-Arambula; Ernesto Ramirez-Gonzalez.; Fernando Gonzalez-Dominguez; Gisela Barrera-Badillo; Irma Lopez-Martinez; Joaquin Quiroz-Mercado; Lucia Hernandez-Rivas; Maribel Gonzalez-Villa; Natividad Cruz-Ortiz; Sergio Rangel-Guerrero; Tatiana Nunez-Garcia; Vanessa Rivero-Arredondo                                                                                                            |
| EPI_ISL_2455946, EPI_ISL_2455952, EPI_ISL_2858941, EPI_ISL_2920726, EPI_ISL_2920730, EPI_ISL_2937777, EPI_ISL_4298895, EPI_ISL_6810216, EPI_ISL_6810219, EPI_ISL_6810223                                                    | LESP Tamaulipas          | Instituto de Diagnostico y Referencia Epidemiologicos (INDRE) | Abril Rodriguez-Maldonado; Ariadna Medina-Benitez; Claudia Wong-Arambula; Ernesto Ramirez-Gonzalez.; Fernando Gonzalez-Dominguez; Gisela Barrera-Badillo; Irma Lopez-Martinez; Joaquin Quiroz-Mercado; Lucia Hernandez-Rivas; Maribel Gonzalez-Villa; Natividad Cruz-Ortiz; Sergio Rangel-Guerrero; Tatiana Nunez-Garcia; Vanessa Rivero-Arredondo                                                                                                            |
| EPI_ISL_4603025                                                                                                                                                                                                             | LESP Tlaxcala            | Instituto de Diagnostico y Referencia Epidemiologicos (INDRE) | Abril Rodriguez-Maldonado; Ariadna Medina-Benitez; Claudia Wong-Arambula; Ernesto Ramirez-Gonzalez.; Fernando Gonzalez-Dominguez; Gisela Barrera-Badillo; Irma Lopez-Martinez; Joaquin Quiroz-Mercado; Lucia Hernandez-Rivas; Maribel Gonzalez-Villa; Natividad Cruz-Ortiz; Sergio Rangel-Guerrero; Tatiana Nunez-Garcia; Vanessa Rivero-Arredondo                                                                                                            |

|                                                                                                                                                                                                                                                                                                                                                                                                                                                                                                                                                                                                                                                                                                                                                                                                                                                                                                                                                                                                                                                                                                                                                                                                                                                                                                                                                                                                                                                                                                                                                                                                                                                                                                                                                                                                                                                                                                                                                                                                                                                                                                                                                                                                                                                                                                                                                                                                                                                                                                                                                                                                                                                                                                                                                                                                                                                                                                                                                                                                                                                                            |                                                                                                                                                                                                                                                                                                                                                                                                                                                                                                                                                                                                                                                                                                                                                                                                                                                                                                                                                                                                                                                                                                                                                                                                                                                                                                                                                                                                                                                                                                                                                                                                                                                                                                                                                                                                                                                                                                                                                                         |                                                                                                                                                    |                                                                                                                                                                                                                                                                                                                                                                    |
|----------------------------------------------------------------------------------------------------------------------------------------------------------------------------------------------------------------------------------------------------------------------------------------------------------------------------------------------------------------------------------------------------------------------------------------------------------------------------------------------------------------------------------------------------------------------------------------------------------------------------------------------------------------------------------------------------------------------------------------------------------------------------------------------------------------------------------------------------------------------------------------------------------------------------------------------------------------------------------------------------------------------------------------------------------------------------------------------------------------------------------------------------------------------------------------------------------------------------------------------------------------------------------------------------------------------------------------------------------------------------------------------------------------------------------------------------------------------------------------------------------------------------------------------------------------------------------------------------------------------------------------------------------------------------------------------------------------------------------------------------------------------------------------------------------------------------------------------------------------------------------------------------------------------------------------------------------------------------------------------------------------------------------------------------------------------------------------------------------------------------------------------------------------------------------------------------------------------------------------------------------------------------------------------------------------------------------------------------------------------------------------------------------------------------------------------------------------------------------------------------------------------------------------------------------------------------------------------------------------------------------------------------------------------------------------------------------------------------------------------------------------------------------------------------------------------------------------------------------------------------------------------------------------------------------------------------------------------------------------------------------------------------------------------------------------------------|-------------------------------------------------------------------------------------------------------------------------------------------------------------------------------------------------------------------------------------------------------------------------------------------------------------------------------------------------------------------------------------------------------------------------------------------------------------------------------------------------------------------------------------------------------------------------------------------------------------------------------------------------------------------------------------------------------------------------------------------------------------------------------------------------------------------------------------------------------------------------------------------------------------------------------------------------------------------------------------------------------------------------------------------------------------------------------------------------------------------------------------------------------------------------------------------------------------------------------------------------------------------------------------------------------------------------------------------------------------------------------------------------------------------------------------------------------------------------------------------------------------------------------------------------------------------------------------------------------------------------------------------------------------------------------------------------------------------------------------------------------------------------------------------------------------------------------------------------------------------------------------------------------------------------------------------------------------------------|----------------------------------------------------------------------------------------------------------------------------------------------------|--------------------------------------------------------------------------------------------------------------------------------------------------------------------------------------------------------------------------------------------------------------------------------------------------------------------------------------------------------------------|
| EPI_ISL_1700812,<br>EPI_ISL_3265658,<br>EPI_ISL_6810325                                                                                                                                                                                                                                                                                                                                                                                                                                                                                                                                                                                                                                                                                                                                                                                                                                                                                                                                                                                                                                                                                                                                                                                                                                                                                                                                                                                                                                                                                                                                                                                                                                                                                                                                                                                                                                                                                                                                                                                                                                                                                                                                                                                                                                                                                                                                                                                                                                                                                                                                                                                                                                                                                                                                                                                                                                                                                                                                                                                                                    | LESP Veracruz                                                                                                                                                                                                                                                                                                                                                                                                                                                                                                                                                                                                                                                                                                                                                                                                                                                                                                                                                                                                                                                                                                                                                                                                                                                                                                                                                                                                                                                                                                                                                                                                                                                                                                                                                                                                                                                                                                                                                           | Instituto de Diagnostico y Referencia Epidemiologicos (INDRE)                                                                                      | Abril Rodriguez-Maldonado; Ariadna Medina-Benitez; Claudia Wong-Arambula; Ernesto Ramirez-Gonzalez.; Fernando Gonzalez-Dominguez; Gisela Barrera-Badillo; Irma Lopez-Martinez; Joaquin Quiroz-Mercado; Lucia Hernandez-Rivas; Maribel Gonzalez-Villa; Natividad Cruz-Ortiz; Sergio Rangel-Guerrero; Tatiana Nunez-Garcia; Vanessa Rivero-Arredondo                 |
| EPI_ISL_2559408,<br>EPI_ISL_2937779,<br>EPI_ISL_3033493,<br>EPI_ISL_6810349                                                                                                                                                                                                                                                                                                                                                                                                                                                                                                                                                                                                                                                                                                                                                                                                                                                                                                                                                                                                                                                                                                                                                                                                                                                                                                                                                                                                                                                                                                                                                                                                                                                                                                                                                                                                                                                                                                                                                                                                                                                                                                                                                                                                                                                                                                                                                                                                                                                                                                                                                                                                                                                                                                                                                                                                                                                                                                                                                                                                | LESP Yucatan                                                                                                                                                                                                                                                                                                                                                                                                                                                                                                                                                                                                                                                                                                                                                                                                                                                                                                                                                                                                                                                                                                                                                                                                                                                                                                                                                                                                                                                                                                                                                                                                                                                                                                                                                                                                                                                                                                                                                            | Instituto de Diagnostico y Referencia Epidemiologicos (INDRE)                                                                                      | Abril Rodriguez-Maldonado; Ariadna Medina-Benitez; Claudia Wong-Arambula; Ernesto Ramirez-Gonzalez.; Fernando Gonzalez-Dominguez; Gisela Barrera-Badillo; Irma Lopez-Martinez; Joaquin Quiroz-Mercado; Lucia Hernandez-Rivas; Maribel Gonzalez-Villa; Natividad Cruz-Ortiz; Sergio Rangel-Guerrero; Tatiana Nunez-Garcia; Vanessa Rivero-Arredondo                 |
| EPI_ISL_1821177                                                                                                                                                                                                                                                                                                                                                                                                                                                                                                                                                                                                                                                                                                                                                                                                                                                                                                                                                                                                                                                                                                                                                                                                                                                                                                                                                                                                                                                                                                                                                                                                                                                                                                                                                                                                                                                                                                                                                                                                                                                                                                                                                                                                                                                                                                                                                                                                                                                                                                                                                                                                                                                                                                                                                                                                                                                                                                                                                                                                                                                            | LESP Zacatecas                                                                                                                                                                                                                                                                                                                                                                                                                                                                                                                                                                                                                                                                                                                                                                                                                                                                                                                                                                                                                                                                                                                                                                                                                                                                                                                                                                                                                                                                                                                                                                                                                                                                                                                                                                                                                                                                                                                                                          | Instituto de Diagnostico y Referencia Epidemiologicos (INDRE)                                                                                      | Abril Rodriguez-Maldonado; Ariadna Medina-Benitez; Claudia Wong-Arambula; Ernesto Ramirez-Gonzalez.; Gisela Barrera-Badillo; Irma Lopez-Martinez; Joaquin Quiroz-Mercado; Lucia Hernandez-Rivas; Natividad Cruz-Ortiz; Sergio Rangel-Guerrero; Tatiana Nunez-Garcia; Vanessa Rivero-Arredondo                                                                      |
| EPI_ISL_1745196,<br>EPI_ISL_2016779,<br>EPI_ISL_2228029                                                                                                                                                                                                                                                                                                                                                                                                                                                                                                                                                                                                                                                                                                                                                                                                                                                                                                                                                                                                                                                                                                                                                                                                                                                                                                                                                                                                                                                                                                                                                                                                                                                                                                                                                                                                                                                                                                                                                                                                                                                                                                                                                                                                                                                                                                                                                                                                                                                                                                                                                                                                                                                                                                                                                                                                                                                                                                                                                                                                                    | LHUB-ULB                                                                                                                                                                                                                                                                                                                                                                                                                                                                                                                                                                                                                                                                                                                                                                                                                                                                                                                                                                                                                                                                                                                                                                                                                                                                                                                                                                                                                                                                                                                                                                                                                                                                                                                                                                                                                                                                                                                                                                | Labo Klinische Biologie, UZA                                                                                                                       | Basil Britto Xavier; Christine Lammens; Herman Goossens; Jasmine Coppens; Marie Le Mercier; Veerle Matheussen                                                                                                                                                                                                                                                      |
| EPI_ISL_2141782                                                                                                                                                                                                                                                                                                                                                                                                                                                                                                                                                                                                                                                                                                                                                                                                                                                                                                                                                                                                                                                                                                                                                                                                                                                                                                                                                                                                                                                                                                                                                                                                                                                                                                                                                                                                                                                                                                                                                                                                                                                                                                                                                                                                                                                                                                                                                                                                                                                                                                                                                                                                                                                                                                                                                                                                                                                                                                                                                                                                                                                            | LIC                                                                                                                                                                                                                                                                                                                                                                                                                                                                                                                                                                                                                                                                                                                                                                                                                                                                                                                                                                                                                                                                                                                                                                                                                                                                                                                                                                                                                                                                                                                                                                                                                                                                                                                                                                                                                                                                                                                                                                     | Latvian Biomedical Research and Study Centre                                                                                                       | Daivids Fridmanis; Diana Dusacka; Elina Dimina; Guntars Zarins; Ivars Silamikelis; Janis Klovinis; Janis Pjalkovskis; Jurisj Perevoscikovs; Kaspars Megnis; Laila Silamikele; Lauma Freimane; Laura Ansona; Liga Birzniece; Monta Ustinova; Nikita Zrelavs; Reinis Zeltmatis; Uga Dumpis; Una Krumina; Vita Rovite                                                 |
| EPI_ISL_5923361                                                                                                                                                                                                                                                                                                                                                                                                                                                                                                                                                                                                                                                                                                                                                                                                                                                                                                                                                                                                                                                                                                                                                                                                                                                                                                                                                                                                                                                                                                                                                                                                                                                                                                                                                                                                                                                                                                                                                                                                                                                                                                                                                                                                                                                                                                                                                                                                                                                                                                                                                                                                                                                                                                                                                                                                                                                                                                                                                                                                                                                            | LIME                                                                                                                                                                                                                                                                                                                                                                                                                                                                                                                                                                                                                                                                                                                                                                                                                                                                                                                                                                                                                                                                                                                                                                                                                                                                                                                                                                                                                                                                                                                                                                                                                                                                                                                                                                                                                                                                                                                                                                    | Laboratorio Departamental de Salud Publica de Antioquia                                                                                            | Ana Victoria Valencia Duarte; Cristian Arbey Velarde Hoyos; Gloria Isabel Escobar; Idabely Betancur Ortiz; Juan P. Hernandez-Ortiz; Juan Pablo Isaza Agudelo; Maria Stella López                                                                                                                                                                                   |
| EPI_ISL_2007222                                                                                                                                                                                                                                                                                                                                                                                                                                                                                                                                                                                                                                                                                                                                                                                                                                                                                                                                                                                                                                                                                                                                                                                                                                                                                                                                                                                                                                                                                                                                                                                                                                                                                                                                                                                                                                                                                                                                                                                                                                                                                                                                                                                                                                                                                                                                                                                                                                                                                                                                                                                                                                                                                                                                                                                                                                                                                                                                                                                                                                                            | LKO                                                                                                                                                                                                                                                                                                                                                                                                                                                                                                                                                                                                                                                                                                                                                                                                                                                                                                                                                                                                                                                                                                                                                                                                                                                                                                                                                                                                                                                                                                                                                                                                                                                                                                                                                                                                                                                                                                                                                                     | Jessa                                                                                                                                              | Berden et al. on behalf of the Jessa_cmdLab                                                                                                                                                                                                                                                                                                                        |
| EPI_ISL_4417614                                                                                                                                                                                                                                                                                                                                                                                                                                                                                                                                                                                                                                                                                                                                                                                                                                                                                                                                                                                                                                                                                                                                                                                                                                                                                                                                                                                                                                                                                                                                                                                                                                                                                                                                                                                                                                                                                                                                                                                                                                                                                                                                                                                                                                                                                                                                                                                                                                                                                                                                                                                                                                                                                                                                                                                                                                                                                                                                                                                                                                                            | LSP de Atlantico                                                                                                                                                                                                                                                                                                                                                                                                                                                                                                                                                                                                                                                                                                                                                                                                                                                                                                                                                                                                                                                                                                                                                                                                                                                                                                                                                                                                                                                                                                                                                                                                                                                                                                                                                                                                                                                                                                                                                        | Centro de Investigaciones en Microbiología y Biotecnología-UR (CIMBIUR), Facultad de Ciencias Naturales, Universidad del Rosario, Bogotá, Colombia | Angie Ramirez; Juan David Ramirez; Luz H. Patiño; Marcela Mercado-Reyes; Marina Muñoz; Nathalia Ballesteros; Nicolas Niño; Sergio Castañeda                                                                                                                                                                                                                        |
| EPI_ISL_3221205,<br>EPI_ISL_3221218                                                                                                                                                                                                                                                                                                                                                                                                                                                                                                                                                                                                                                                                                                                                                                                                                                                                                                                                                                                                                                                                                                                                                                                                                                                                                                                                                                                                                                                                                                                                                                                                                                                                                                                                                                                                                                                                                                                                                                                                                                                                                                                                                                                                                                                                                                                                                                                                                                                                                                                                                                                                                                                                                                                                                                                                                                                                                                                                                                                                                                        | LSUHS Emerging Viral Threat Laboratory                                                                                                                                                                                                                                                                                                                                                                                                                                                                                                                                                                                                                                                                                                                                                                                                                                                                                                                                                                                                                                                                                                                                                                                                                                                                                                                                                                                                                                                                                                                                                                                                                                                                                                                                                                                                                                                                                                                                  | LSUHS Emerging Viral Threat Laboratory                                                                                                             | Alexander Mijalis; Andrew D. Yurochko; Christopher G. Kevil; Gregory L. Ware; Jennifer L. Carroll; Jeremy P. Kamil; John A. Vanchiere; Maarten Van Diest; Rona S. Scott                                                                                                                                                                                            |
| EPI_ISL_578965, EPI_ISL_653402, EPI_ISL_653573, EPI_ISL_653589, EPI_ISL_768407, EPI_ISL_779097, EPI_ISL_889461                                                                                                                                                                                                                                                                                                                                                                                                                                                                                                                                                                                                                                                                                                                                                                                                                                                                                                                                                                                                                                                                                                                                                                                                                                                                                                                                                                                                                                                                                                                                                                                                                                                                                                                                                                                                                                                                                                                                                                                                                                                                                                                                                                                                                                                                                                                                                                                                                                                                                                                                                                                                                                                                                                                                                                                                                                                                                                                                                             | see above                                                                                                                                                                                                                                                                                                                                                                                                                                                                                                                                                                                                                                                                                                                                                                                                                                                                                                                                                                                                                                                                                                                                                                                                                                                                                                                                                                                                                                                                                                                                                                                                                                                                                                                                                                                                                                                                                                                                                               | LSUHS Emerging Viral Threat Laboratory                                                                                                             | Andrew D. Yurochko; Camille F. Abshire; Christopher G. Kevil; Daniel J. Snyder; Jennifer L. Carroll; Jeremy P. Kamil; John A. Vanchiere; Katarzyna Zwolinska; Maarten Van Diest; Malgorzata Bienkowska-Haba; Martin J. Sapp; Mohammed N.A. Siddiquey; Rona S. Scott; Vaughn S. Cooper                                                                              |
| EPI_ISL_4508269                                                                                                                                                                                                                                                                                                                                                                                                                                                                                                                                                                                                                                                                                                                                                                                                                                                                                                                                                                                                                                                                                                                                                                                                                                                                                                                                                                                                                                                                                                                                                                                                                                                                                                                                                                                                                                                                                                                                                                                                                                                                                                                                                                                                                                                                                                                                                                                                                                                                                                                                                                                                                                                                                                                                                                                                                                                                                                                                                                                                                                                            | Lab Helix Depok                                                                                                                                                                                                                                                                                                                                                                                                                                                                                                                                                                                                                                                                                                                                                                                                                                                                                                                                                                                                                                                                                                                                                                                                                                                                                                                                                                                                                                                                                                                                                                                                                                                                                                                                                                                                                                                                                                                                                         | National Institute of Health Research and Development                                                                                              | Arie Ardiansyah Nugraha; Fajar Nur; Hana Apsari Pawestri; Hartanti Dian Ikawati; Kartika Dewi Puspa; Krisna Pangesti; Nelly Puspandari; Subangkit; Sulistiyohadi; Triyani Soekarso; Vivi Setiawaty                                                                                                                                                                 |
| EPI_ISL_1369160,<br>EPI_ISL_1533023,<br>EPI_ISL_1827170,<br>EPI_ISL_1827408                                                                                                                                                                                                                                                                                                                                                                                                                                                                                                                                                                                                                                                                                                                                                                                                                                                                                                                                                                                                                                                                                                                                                                                                                                                                                                                                                                                                                                                                                                                                                                                                                                                                                                                                                                                                                                                                                                                                                                                                                                                                                                                                                                                                                                                                                                                                                                                                                                                                                                                                                                                                                                                                                                                                                                                                                                                                                                                                                                                                | Lab voor klinische biologie                                                                                                                                                                                                                                                                                                                                                                                                                                                                                                                                                                                                                                                                                                                                                                                                                                                                                                                                                                                                                                                                                                                                                                                                                                                                                                                                                                                                                                                                                                                                                                                                                                                                                                                                                                                                                                                                                                                                             | Lab voor klinische biologie                                                                                                                        | Bruno Verhasselt; Hannelore Hamerlinck; Marija Janevska                                                                                                                                                                                                                                                                                                            |
| EPI_ISL_3214414, EPI_ISL_3214416, EPI_ISL_3214453, EPI_ISL_3214479, EPI_ISL_3214503, EPI_ISL_3214624, EPI_ISL_3214630                                                                                                                                                                                                                                                                                                                                                                                                                                                                                                                                                                                                                                                                                                                                                                                                                                                                                                                                                                                                                                                                                                                                                                                                                                                                                                                                                                                                                                                                                                                                                                                                                                                                                                                                                                                                                                                                                                                                                                                                                                                                                                                                                                                                                                                                                                                                                                                                                                                                                                                                                                                                                                                                                                                                                                                                                                                                                                                                                      | see above                                                                                                                                                                                                                                                                                                                                                                                                                                                                                                                                                                                                                                                                                                                                                                                                                                                                                                                                                                                                                                                                                                                                                                                                                                                                                                                                                                                                                                                                                                                                                                                                                                                                                                                                                                                                                                                                                                                                                               | Lab. Microbiologia e Virologia Cotugno A.O. dei Colli                                                                                              | TIGEM<br>Antonio Grimaldi Patrizia Annunziata Francesco Panariello Biancamaria Pierri Claudia Tiberio Teresa Giuliano Valentina Bouche Chiara Colantuono Maria Concetta Cuomo Denise Di Concilio Lucio Di Filippo Anna Manfredi Marcello Salvi Antonio Limone Luigi Atripaldi Pellegrino Cerino Andrea Ballabio Davide Cacciarelli                                 |
| EPI_ISL_852819                                                                                                                                                                                                                                                                                                                                                                                                                                                                                                                                                                                                                                                                                                                                                                                                                                                                                                                                                                                                                                                                                                                                                                                                                                                                                                                                                                                                                                                                                                                                                                                                                                                                                                                                                                                                                                                                                                                                                                                                                                                                                                                                                                                                                                                                                                                                                                                                                                                                                                                                                                                                                                                                                                                                                                                                                                                                                                                                                                                                                                                             | Lab. Microbiologia e Virologia, Cotugno, A.O. dei Colli                                                                                                                                                                                                                                                                                                                                                                                                                                                                                                                                                                                                                                                                                                                                                                                                                                                                                                                                                                                                                                                                                                                                                                                                                                                                                                                                                                                                                                                                                                                                                                                                                                                                                                                                                                                                                                                                                                                 | Lab. Microbiologia e Virologia, Cotugno, A.O. dei Colli                                                                                            | Anna Perfetti; Claudia Tiberio; Luigi Atripaldi                                                                                                                                                                                                                                                                                                                    |
| EPI_ISL_1436154,<br>EPI_ISL_1643282,<br>EPI_ISL_1847647,<br>EPI_ISL_3238099,<br>EPI_ISL_3238537,<br>EPI_ISL_3238681                                                                                                                                                                                                                                                                                                                                                                                                                                                                                                                                                                                                                                                                                                                                                                                                                                                                                                                                                                                                                                                                                                                                                                                                                                                                                                                                                                                                                                                                                                                                                                                                                                                                                                                                                                                                                                                                                                                                                                                                                                                                                                                                                                                                                                                                                                                                                                                                                                                                                                                                                                                                                                                                                                                                                                                                                                                                                                                                                        | LabKom - Labor Augsburg MVZ GmbH                                                                                                                                                                                                                                                                                                                                                                                                                                                                                                                                                                                                                                                                                                                                                                                                                                                                                                                                                                                                                                                                                                                                                                                                                                                                                                                                                                                                                                                                                                                                                                                                                                                                                                                                                                                                                                                                                                                                        | Robert Koch Institute                                                                                                                              |                                                                                                                                                                                                                                                                                                                                                                    |
| EPI_ISL_1349983,<br>EPI_ISL_1846266                                                                                                                                                                                                                                                                                                                                                                                                                                                                                                                                                                                                                                                                                                                                                                                                                                                                                                                                                                                                                                                                                                                                                                                                                                                                                                                                                                                                                                                                                                                                                                                                                                                                                                                                                                                                                                                                                                                                                                                                                                                                                                                                                                                                                                                                                                                                                                                                                                                                                                                                                                                                                                                                                                                                                                                                                                                                                                                                                                                                                                        | LabKom - Labor Hannover MVZ GmbH                                                                                                                                                                                                                                                                                                                                                                                                                                                                                                                                                                                                                                                                                                                                                                                                                                                                                                                                                                                                                                                                                                                                                                                                                                                                                                                                                                                                                                                                                                                                                                                                                                                                                                                                                                                                                                                                                                                                        | Robert Koch Institute                                                                                                                              |                                                                                                                                                                                                                                                                                                                                                                    |
| EPI_ISL_1285491,<br>EPI_ISL_1721338                                                                                                                                                                                                                                                                                                                                                                                                                                                                                                                                                                                                                                                                                                                                                                                                                                                                                                                                                                                                                                                                                                                                                                                                                                                                                                                                                                                                                                                                                                                                                                                                                                                                                                                                                                                                                                                                                                                                                                                                                                                                                                                                                                                                                                                                                                                                                                                                                                                                                                                                                                                                                                                                                                                                                                                                                                                                                                                                                                                                                                        | LabKom - MVZ Labor Bochum MLB GmbH                                                                                                                                                                                                                                                                                                                                                                                                                                                                                                                                                                                                                                                                                                                                                                                                                                                                                                                                                                                                                                                                                                                                                                                                                                                                                                                                                                                                                                                                                                                                                                                                                                                                                                                                                                                                                                                                                                                                      | Robert Koch Institute                                                                                                                              |                                                                                                                                                                                                                                                                                                                                                                    |
| EPI_ISL_872280, EPI_ISL_935550, EPI_ISL_1035964, EPI_ISL_1060375, EPI_ISL_1110399, EPI_ISL_1201521, EPI_ISL_1262809, EPI_ISL_1262959, EPI_ISL_1263048, EPI_ISL_1263052, EPI_ISL_1301947, EPI_ISL_1389170, EPI_ISL_1389170, EPI_ISL_1389285, EPI_ISL_1389314, EPI_ISL_1417405, EPI_ISL_1417184, EPI_ISL_1417185, EPI_ISL_1417185, EPI_ISL_1465545, EPI_ISL_1465584, EPI_ISL_1516990, EPI_ISL_1517200, EPI_ISL_1517257, EPI_ISL_1517286, EPI_ISL_1583048, EPI_ISL_1588998, EPI_ISL_1594426, EPI_ISL_1594426, EPI_ISL_1789004, EPI_ISL_1821534, EPI_ISL_1857033, EPI_ISL_2029626, EPI_ISL_2029775, EPI_ISL_2029833, EPI_ISL_2029877, EPI_ISL_2029898, EPI_ISL_2030013, EPI_ISL_2178471, EPI_ISL_2188335, EPI_ISL_2293441, EPI_ISL_2374254, EPI_ISL_2374459, EPI_ISL_2532343, EPI_ISL_2532344, EPI_ISL_2532454, EPI_ISL_2535238, EPI_ISL_2535254, EPI_ISL_2535535, EPI_ISL_2535578, EPI_ISL_2612606, EPI_ISL_2757681, EPI_ISL_2835798, EPI_ISL_2835870, EPI_ISL_2835890, EPI_ISL_2923114, EPI_ISL_2958787, EPI_ISL_2958793, EPI_ISL_3031667, EPI_ISL_3031718, EPI_ISL_3031903, EPI_ISL_3153343, EPI_ISL_3153461, EPI_ISL_3153481, EPI_ISL_3153525, EPI_ISL_3219482, EPI_ISL_3219494, EPI_ISL_3219496, EPI_ISL_3219502, EPI_ISL_3219573, EPI_ISL_3219604, EPI_ISL_3219604, EPI_ISL_3219653, EPI_ISL_3219656, EPI_ISL_3219684, EPI_ISL_3219684, EPI_ISL_3245793, EPI_ISL_3246006, EPI_ISL_3305878, EPI_ISL_3305911, EPI_ISL_3305924, EPI_ISL_3306067, EPI_ISL_3306115, EPI_ISL_3306166, EPI_ISL_3306223, EPI_ISL_3355893, EPI_ISL_3375471, EPI_ISL_3392639, EPI_ISL_3392661, EPI_ISL_3506816, EPI_ISL_3542898, EPI_ISL_3690167, EPI_ISL_3690168, EPI_ISL_3690174, EPI_ISL_3690468, EPI_ISL_3690493, EPI_ISL_3804095, EPI_ISL_3804138, EPI_ISL_3804189, EPI_ISL_3804330, EPI_ISL_3804345, EPI_ISL_3804443, EPI_ISL_3979548, EPI_ISL_3979559, EPI_ISL_3979640, EPI_ISL_3999695, EPI_ISL_3999789, EPI_ISL_3999801, EPI_ISL_3999862, EPI_ISL_3999916, EPI_ISL_3999949, EPI_ISL_4171610, EPI_ISL_4171659, EPI_ISL_4194432, EPI_ISL_4194436, EPI_ISL_4194529, EPI_ISL_4411311, EPI_ISL_4411662, EPI_ISL_4411877, EPI_ISL_4412159, EPI_ISL_4412210, EPI_ISL_4503641, EPI_ISL_4503653, EPI_ISL_4503793, EPI_ISL_4503849, EPI_ISL_4503870, EPI_ISL_4600607, EPI_ISL_4600610, EPI_ISL_4600737, EPI_ISL_4600913, EPI_ISL_4879161, EPI_ISL_4879176, EPI_ISL_4951153, EPI_ISL_5306578, EPI_ISL_5306584, EPI_ISL_5306925, EPI_ISL_5604427, EPI_ISL_5718043, EPI_ISL_5945512, EPI_ISL_5945574, EPI_ISL_5945597, EPI_ISL_5945601, EPI_ISL_5945715, EPI_ISL_5945891, EPI_ISL_5945995, EPI_ISL_6031245, EPI_ISL_6116636, EPI_ISL_6116673, EPI_ISL_6116749, EPI_ISL_6116813, EPI_ISL_6315712, EPI_ISL_6315725, EPI_ISL_6315867, EPI_ISL_6315893, EPI_ISL_6424875, EPI_ISL_6471279, EPI_ISL_6471386, EPI_ISL_6471527, EPI_ISL_6595034, EPI_ISL_6595142, EPI_ISL_6699222, EPI_ISL_6699358, EPI_ISL_6699388, EPI_ISL_6711163, EPI_ISL_6711169, EPI_ISL_6711199, EPI_ISL_6711252, EPI_ISL_6711288, EPI_ISL_6843385, EPI_ISL_6843470, EPI_ISL_6884967, EPI_ISL_6885068, EPI_ISL_6885181, EPI_ISL_6885181 | Adrien Pain; Alexandra Ducancelli; Amaury Vaysse; Angela Brisebarre; Anne Holstein; Anne-Claire Strzelecki; Ardi Di Cocco; Arnaud Serpentin; BELHOUACHI Nabila; Baptiste Moreira; Beate HEYM; Beate Heym; Benedicte Baccouch; Bour Jean Baptiste; Briec Gustin; Camille Capel; Carine LECORRE; Carine Lecorre; Caroline MALDERET; Caroline Malderet; Cerballance Ile De France Sud; Christophe Malabat; Claire Felloni; Claire Pottier; Coignard Catherine; Coralie Jean; Corinne Maufrais; Céline Bressollette; DES GARETS Marie-Caroline; Delphine MammES; Domitille Leman; Emmanuel Chanard; Emmanuelle Pernal; Eric Morin; Etienne Simon-Lorière; F Bondu; F. Kerdauid; Felloni Claire; Fiorina Jc; Florent Tomasi; François Nestour; François NESTOUR; Frédéric Lemoine; Fx Hue; GréGoire Potiron; Guillaume Aubin; Hub Bioinformatique Biostatistiques; Hub de Bioinformatique et Biostatistique; Hub de Bioinformatique et Statistique; Hub de Bioinformatique et Biostatistique; Hub de bioinformatique et biostatistique; Hugues Leroy; J.M CORCY; Jean-François Comes; Judith Zerah; Julien Fumej; Karine Michez; Laurence Prots; Lefauere Briec; Leonard Pierre-Yves; Louise Lefrançois; MICHEZ Karine; Marie-Hélène Glaudon Louveau De La Guigneraie; Marion Barbet; Maud Gourbill; Maud Vanpeene; Méline Bizard; Nabil Gastli; Nabila Belhouachi; Nader Kherbek; Nouri Taleb; Olivier Dejoux; OphéLIE Saïd-Delattre; POTIRON Grégoire; Philippe GIRARD; Philippe Girard; Pierre Chardon; Pierre-Marie Collin; Pierre-Yves Leonard; Potiron GréGoire; ROBERT Sylvie; Ronan Pichard; Roquebert BeNéDicte; S. Cocco; Sabine Trombert; Slim El Khiairi; Slim El-Khiairi; Sophie Chalmin; Sylvie Behillili; Sylvie Lamy; Sylvie Robert; Sylvie Van der Werf; Sylvie Van der Werf; Sylvie van der Werf; SéVerine Haouïsee; TROMBERT Sabine; Thierry Guffond; ValÉrie Weber; Vanessa Magin; Victoire Baillet; Vincent Enouf; Vincent Vieillefond; Xavier Guettier |                                                                                                                                                    |                                                                                                                                                                                                                                                                                                                                                                    |
| EPI_ISL_593928                                                                                                                                                                                                                                                                                                                                                                                                                                                                                                                                                                                                                                                                                                                                                                                                                                                                                                                                                                                                                                                                                                                                                                                                                                                                                                                                                                                                                                                                                                                                                                                                                                                                                                                                                                                                                                                                                                                                                                                                                                                                                                                                                                                                                                                                                                                                                                                                                                                                                                                                                                                                                                                                                                                                                                                                                                                                                                                                                                                                                                                             | Labo Analyses Med, Puteaux                                                                                                                                                                                                                                                                                                                                                                                                                                                                                                                                                                                                                                                                                                                                                                                                                                                                                                                                                                                                                                                                                                                                                                                                                                                                                                                                                                                                                                                                                                                                                                                                                                                                                                                                                                                                                                                                                                                                              | National Reference Center for Viruses of Respiratory Infections, Institut Pasteur, Paris                                                           | Etienne Simon-Lorière; Fabiana Gambaro; Maud Vanpeene; Sylvie Behillili; Sylvie van der Werf; Vincent Enouf                                                                                                                                                                                                                                                        |
| EPI_ISL_935613,<br>EPI_ISL_2374492,<br>EPI_ISL_2709311                                                                                                                                                                                                                                                                                                                                                                                                                                                                                                                                                                                                                                                                                                                                                                                                                                                                                                                                                                                                                                                                                                                                                                                                                                                                                                                                                                                                                                                                                                                                                                                                                                                                                                                                                                                                                                                                                                                                                                                                                                                                                                                                                                                                                                                                                                                                                                                                                                                                                                                                                                                                                                                                                                                                                                                                                                                                                                                                                                                                                     | Labo Analyses med                                                                                                                                                                                                                                                                                                                                                                                                                                                                                                                                                                                                                                                                                                                                                                                                                                                                                                                                                                                                                                                                                                                                                                                                                                                                                                                                                                                                                                                                                                                                                                                                                                                                                                                                                                                                                                                                                                                                                       | National Reference Center for Viruses of Respiratory Infections, Institut Pasteur, Paris                                                           | Amzalag Jonas; Angela Brisebarre; Camille Capel; Christophe Malabat; Corinne Maufrais; Emmanuelle Pernal; Etienne Simon-Lorière; Frédéric Lemoine; Jean-François Comes; Louise Lefrançois; Marion Barbet; Maud Vanpeene; Méline Bizard; OphéLIE Saïd-Delattre; Sylvie Behillili; Sylvie Van der Werf; Sylvie van der Werf; Vincent Enouf                           |
| EPI_ISL_965420                                                                                                                                                                                                                                                                                                                                                                                                                                                                                                                                                                                                                                                                                                                                                                                                                                                                                                                                                                                                                                                                                                                                                                                                                                                                                                                                                                                                                                                                                                                                                                                                                                                                                                                                                                                                                                                                                                                                                                                                                                                                                                                                                                                                                                                                                                                                                                                                                                                                                                                                                                                                                                                                                                                                                                                                                                                                                                                                                                                                                                                             | Labo Luc Olivier                                                                                                                                                                                                                                                                                                                                                                                                                                                                                                                                                                                                                                                                                                                                                                                                                                                                                                                                                                                                                                                                                                                                                                                                                                                                                                                                                                                                                                                                                                                                                                                                                                                                                                                                                                                                                                                                                                                                                        | GIGA Medical Genomics                                                                                                                              | Bouchra Boujemla; Cécile Meex; Keith Durkin; Maria Artes; Marie-Pierre Hayette; Pierrette Melin; Raphaël Boreux; Sébastien Bontems; Vincent Bours                                                                                                                                                                                                                  |
| EPI_ISL_1583081,<br>EPI_ISL_1583090                                                                                                                                                                                                                                                                                                                                                                                                                                                                                                                                                                                                                                                                                                                                                                                                                                                                                                                                                                                                                                                                                                                                                                                                                                                                                                                                                                                                                                                                                                                                                                                                                                                                                                                                                                                                                                                                                                                                                                                                                                                                                                                                                                                                                                                                                                                                                                                                                                                                                                                                                                                                                                                                                                                                                                                                                                                                                                                                                                                                                                        | Labo analyses Med                                                                                                                                                                                                                                                                                                                                                                                                                                                                                                                                                                                                                                                                                                                                                                                                                                                                                                                                                                                                                                                                                                                                                                                                                                                                                                                                                                                                                                                                                                                                                                                                                                                                                                                                                                                                                                                                                                                                                       | National Reference Center for Viruses of Respiratory Infections, Institut Pasteur, Paris                                                           | Angela Brisebarre; Anne Holstein; Camille Capel; Christophe Malabat; Corinne Maufrais; Etienne Simon-Lorière; Frédéric Lemoine; Hub de Bioinformatique et Biostatistiques; Marion Barbet; Maud Vanpeene; Méline Bizard; Sylvie Behillili; Sylvie van der Werf; Vincent Enouf                                                                                       |
| EPI_ISL_1416871,<br>EPI_ISL_1416899,<br>EPI_ISL_4211206,<br>EPI_ISL_4211215                                                                                                                                                                                                                                                                                                                                                                                                                                                                                                                                                                                                                                                                                                                                                                                                                                                                                                                                                                                                                                                                                                                                                                                                                                                                                                                                                                                                                                                                                                                                                                                                                                                                                                                                                                                                                                                                                                                                                                                                                                                                                                                                                                                                                                                                                                                                                                                                                                                                                                                                                                                                                                                                                                                                                                                                                                                                                                                                                                                                | Labo analyses med                                                                                                                                                                                                                                                                                                                                                                                                                                                                                                                                                                                                                                                                                                                                                                                                                                                                                                                                                                                                                                                                                                                                                                                                                                                                                                                                                                                                                                                                                                                                                                                                                                                                                                                                                                                                                                                                                                                                                       | National Reference Center for Viruses of Respiratory Infections, Institut Pasteur, Paris                                                           | Angela Brisebarre; Anne Holstein; Camille Capel; Christophe Malabat; Corinne Maufrais; Etienne Simon-Lorière; Frédéric Lemoine; Hub de Bioinformatique et Biostatistiques; Jonas Amzalag; Louise Lefrançois; Marion Barbet; Maud Vanpeene; Méline Bizard; StéPhanie Guyomard-Rabenirina; Sylvie Behillili; Sylvie Van der Werf; Sylvie van der Werf; Vincent Enouf |
| EPI_ISL_1349834                                                                                                                                                                                                                                                                                                                                                                                                                                                                                                                                                                                                                                                                                                                                                                                                                                                                                                                                                                                                                                                                                                                                                                                                                                                                                                                                                                                                                                                                                                                                                                                                                                                                                                                                                                                                                                                                                                                                                                                                                                                                                                                                                                                                                                                                                                                                                                                                                                                                                                                                                                                                                                                                                                                                                                                                                                                                                                                                                                                                                                                            | Labor 28 MVZ GmbH                                                                                                                                                                                                                                                                                                                                                                                                                                                                                                                                                                                                                                                                                                                                                                                                                                                                                                                                                                                                                                                                                                                                                                                                                                                                                                                                                                                                                                                                                                                                                                                                                                                                                                                                                                                                                                                                                                                                                       | Robert Koch Institute                                                                                                                              |                                                                                                                                                                                                                                                                                                                                                                    |
| EPI_ISL_1840811,<br>EPI_ISL_1982546,<br>EPI_ISL_1989457,<br>EPI_ISL_2107869,<br>EPI_ISL_3182199                                                                                                                                                                                                                                                                                                                                                                                                                                                                                                                                                                                                                                                                                                                                                                                                                                                                                                                                                                                                                                                                                                                                                                                                                                                                                                                                                                                                                                                                                                                                                                                                                                                                                                                                                                                                                                                                                                                                                                                                                                                                                                                                                                                                                                                                                                                                                                                                                                                                                                                                                                                                                                                                                                                                                                                                                                                                                                                                                                            | Labor Berlin Charité Vivantes GmbH / Institut für Virologie                                                                                                                                                                                                                                                                                                                                                                                                                                                                                                                                                                                                                                                                                                                                                                                                                                                                                                                                                                                                                                                                                                                                                                                                                                                                                                                                                                                                                                                                                                                                                                                                                                                                                                                                                                                                                                                                                                             | Charité Universitätsmedizin Berlin, Institut für Virologie/Labor Berlin                                                                            | Barbara Mühlemann; Christian Drosten; Christine Stephan; Peter Menzel; Rolf Schwarzer; Terry Jones; Victor M Corman                                                                                                                                                                                                                                                |
| EPI_ISL_1570698                                                                                                                                                                                                                                                                                                                                                                                                                                                                                                                                                                                                                                                                                                                                                                                                                                                                                                                                                                                                                                                                                                                                                                                                                                                                                                                                                                                                                                                                                                                                                                                                                                                                                                                                                                                                                                                                                                                                                                                                                                                                                                                                                                                                                                                                                                                                                                                                                                                                                                                                                                                                                                                                                                                                                                                                                                                                                                                                                                                                                                                            | Labor Blackholm MVZ                                                                                                                                                                                                                                                                                                                                                                                                                                                                                                                                                                                                                                                                                                                                                                                                                                                                                                                                                                                                                                                                                                                                                                                                                                                                                                                                                                                                                                                                                                                                                                                                                                                                                                                                                                                                                                                                                                                                                     | Robert Koch Institute                                                                                                                              |                                                                                                                                                                                                                                                                                                                                                                    |
| EPI_ISL_1716033,<br>EPI_ISL_1716229,<br>EPI_ISL_1861743,<br>EPI_ISL_1862280                                                                                                                                                                                                                                                                                                                                                                                                                                                                                                                                                                                                                                                                                                                                                                                                                                                                                                                                                                                                                                                                                                                                                                                                                                                                                                                                                                                                                                                                                                                                                                                                                                                                                                                                                                                                                                                                                                                                                                                                                                                                                                                                                                                                                                                                                                                                                                                                                                                                                                                                                                                                                                                                                                                                                                                                                                                                                                                                                                                                | Labor Dr. Fenner und Kollegen                                                                                                                                                                                                                                                                                                                                                                                                                                                                                                                                                                                                                                                                                                                                                                                                                                                                                                                                                                                                                                                                                                                                                                                                                                                                                                                                                                                                                                                                                                                                                                                                                                                                                                                                                                                                                                                                                                                                           | Heinrich Pette Institute, Leibniz Institute for Experimental Virology                                                                              | Adam Grundhoff; Alexis Robitaille; Johannes Knobloch; Martin Aepfelbacher; Nicole Fischer; Thomas Günther                                                                                                                                                                                                                                                          |
| EPI_ISL_1640074,<br>EPI_ISL_2129706                                                                                                                                                                                                                                                                                                                                                                                                                                                                                                                                                                                                                                                                                                                                                                                                                                                                                                                                                                                                                                                                                                                                                                                                                                                                                                                                                                                                                                                                                                                                                                                                                                                                                                                                                                                                                                                                                                                                                                                                                                                                                                                                                                                                                                                                                                                                                                                                                                                                                                                                                                                                                                                                                                                                                                                                                                                                                                                                                                                                                                        | Labor Dr. Heidrich & Kollegen MVZ GmbH Hamburg                                                                                                                                                                                                                                                                                                                                                                                                                                                                                                                                                                                                                                                                                                                                                                                                                                                                                                                                                                                                                                                                                                                                                                                                                                                                                                                                                                                                                                                                                                                                                                                                                                                                                                                                                                                                                                                                                                                          | Robert Koch Institute                                                                                                                              |                                                                                                                                                                                                                                                                                                                                                                    |
| EPI_ISL_1351998,<br>EPI_ISL_1847107,<br>EPI_ISL_2125507                                                                                                                                                                                                                                                                                                                                                                                                                                                                                                                                                                                                                                                                                                                                                                                                                                                                                                                                                                                                                                                                                                                                                                                                                                                                                                                                                                                                                                                                                                                                                                                                                                                                                                                                                                                                                                                                                                                                                                                                                                                                                                                                                                                                                                                                                                                                                                                                                                                                                                                                                                                                                                                                                                                                                                                                                                                                                                                                                                                                                    | Labor Dr. Schumacher MVZ                                                                                                                                                                                                                                                                                                                                                                                                                                                                                                                                                                                                                                                                                                                                                                                                                                                                                                                                                                                                                                                                                                                                                                                                                                                                                                                                                                                                                                                                                                                                                                                                                                                                                                                                                                                                                                                                                                                                                | Robert Koch Institute                                                                                                                              |                                                                                                                                                                                                                                                                                                                                                                    |



|                                                                                                                                                                                                                                                                                                                                                                                                                                                                                                             |                                                                                                                                                                              |                                                                                                                                                                                                     |                                                                                                                                                                                                                                                                                                                                                                                                                                                                                                                                                                                                                                                                                                                                                                                                                                                                                                                                                                                                                                                                                                                                                                                                                                                                                                                                                                                                                                                                                                                                                                                                                                                                                                                                                                                                                                                                                                                                                        |
|-------------------------------------------------------------------------------------------------------------------------------------------------------------------------------------------------------------------------------------------------------------------------------------------------------------------------------------------------------------------------------------------------------------------------------------------------------------------------------------------------------------|------------------------------------------------------------------------------------------------------------------------------------------------------------------------------|-----------------------------------------------------------------------------------------------------------------------------------------------------------------------------------------------------|--------------------------------------------------------------------------------------------------------------------------------------------------------------------------------------------------------------------------------------------------------------------------------------------------------------------------------------------------------------------------------------------------------------------------------------------------------------------------------------------------------------------------------------------------------------------------------------------------------------------------------------------------------------------------------------------------------------------------------------------------------------------------------------------------------------------------------------------------------------------------------------------------------------------------------------------------------------------------------------------------------------------------------------------------------------------------------------------------------------------------------------------------------------------------------------------------------------------------------------------------------------------------------------------------------------------------------------------------------------------------------------------------------------------------------------------------------------------------------------------------------------------------------------------------------------------------------------------------------------------------------------------------------------------------------------------------------------------------------------------------------------------------------------------------------------------------------------------------------------------------------------------------------------------------------------------------------|
|                                                                                                                                                                                                                                                                                                                                                                                                                                                                                                             |                                                                                                                                                                              |                                                                                                                                                                                                     | Esteban Muñoz-Medina; José de Jesús Nuñez-Contreras; Juan Bautista Chale-Dzul; Julissa Enciso-Ibarra; Kathia Elizabeth Tapia-Díaz; Luis Alberto Ochoa-Carrera; Margarita Matías-Florentino; Mario Mújica-Sánchez; Marissa Perez-García; María Eugenia Jiménez-Corona; María Guadalupe Santiago-Mauricio; María Guadalupe de Jesús Mireles-Rivera; Nelly Sélem-Mojica; Pavel Isa; Ricardo Ciria Merce; Ricardo Grande; Rosa María Gutiérrez Ríos; Rosario Vazquez-Larios; Santiago Ávila-Ríos; Selene Zárate; Susana Lopez; Verónica Mata-Haro; Víctor Eduardo García-Arias; Víctor Eduardo García-Arias; Víctor Hugo Borja-Aburto                                                                                                                                                                                                                                                                                                                                                                                                                                                                                                                                                                                                                                                                                                                                                                                                                                                                                                                                                                                                                                                                                                                                                                                                                                                                                                                      |
| EPI_ISL_1279407, EPI_ISL_1279442, EPI_ISL_1279559, EPI_ISL_1585569                                                                                                                                                                                                                                                                                                                                                                                                                                          | Laboratorio Central de Epidemiología (LCE)                                                                                                                                   | Instituto Nacional de Enfermedades Respiratorias (NER): Centro de Investigación en Enfermedades Infecciosas (CIENI)                                                                                 | Alejandro Sanchez-Flores; Alfredo Herrera-Estrella; Alicia Ocaña-Mondragón; Angel Gustavo Salas-Lais; Bernardo Martínez-Miguel; Blanca Taboada; Brenda Irasema Maldonado-Meza; Carla Ivón Herrera-Najera; Carlos F. Arias; Celia Boukadida; Clara Esperanza Santacruz-Tinoco; Concepción Grajales-Muñiz; Consorcio Mexicano de Vigilancia Genómica (CoViGen-Mex). Authors (in alphabetical order): Julio Elias Alvarado-Yaah; Célida Duque Molina; Fernando Fontove-Herrera; Francisco Pulido; Gloria Elena Espinosa-Ayala; Gloria Elena Espinoza-Ayala; Gloria María Molina-Salinas; Gloria Vazquez; Hector Esteban Paz-Juárez; Hector Montoya-Fuentes; Helen Haydee Fernanda Ramirez-Plascencia; Jorge Ivan Salinal-Navarez; José Antonio Enciso-Moreno; José Esteban Muñoz-Medina; José de Jesús Nuñez-Contreras; Juan Bautista Chale-Dzul; Luis Alberto Ochoa-Carrera; Margarita Matías-Florentino; María Guadalupe Santiago-Mauricio; María Guadalupe de Jesús Mireles-Rivera; Nelly Sélem-Mojica; Pavel Isa; Ricardo Grande; Santiago Ávila-Ríos; Víctor Eduardo García-Arias; Víctor Hugo Borja-Aburto                                                                                                                                                                                                                                                                                                                                                                                                                                                                                                                                                                                                                                                                                                                                                                                                                                          |
| EPI_ISL_1288202, EPI_ISL_1288421, EPI_ISL_1416602, EPI_ISL_1416612, EPI_ISL_1416618, EPI_ISL_1811382, EPI_ISL_1811391, EPI_ISL_1811427, EPI_ISL_1811453, EPI_ISL_1811537, EPI_ISL_2391574, EPI_ISL_2681159, EPI_ISL_2801819, EPI_ISL_2801874, EPI_ISL_3133769, EPI_ISL_4006437, EPI_ISL_4006498, EPI_ISL_4878721, EPI_ISL_4878722, EPI_ISL_4878736, EPI_ISL_4878784, EPI_ISL_4878795, EPI_ISL_4878815, EPI_ISL_5936827, EPI_ISL_5936845, EPI_ISL_5936978, EPI_ISL_5937029, EPI_ISL_6863557, EPI_ISL_6863603 | see above                                                                                                                                                                    | Laboratorio Central de Epidemiología (LCE)                                                                                                                                                          | ; Alejandra Garcia-Gasca; Alejandra García-Gasca; Alejandra Hernández-Terán; Alejandro Sanchez-Flores; Alejandro Sánchez-Flores; Alfredo Herrera-Estrella; Alicia Ocaña-Mondragón; Andreu Comas-García; Angel Gustavo Salas-Lais; Antonio Loza Román; Bernardo Martínez-Miguel; Blanca Taboada; Brenda Irasema Maldonado-Meza; Bruno Gomez-Gil; Bruno Gómez-Gil; Carla Ivón Herrera-Najera; Carlos F. Arias; Celia Boukadida; Clara Esperanza Santacruz-Tinoco; Concepción Grajales-Muñiz; Consorcio Mexicano de Vigilancia Genómica (CoViGen-Mex). Authors (in alphabetical order): Julio Elias Alvarado-Yaah; Cristóbal Chacade-Quiróz; Célida Duque-Molina; Célida Martínez- Rodríguez; Daniel Lira Morales; Eduardo Becerri-Vargas; Fernando Fontove-Herrera; Fidencio Mejía-Nepomuceno; Francisco Pulido; Gloria Elena Espinosa-Ayala; Gloria Elena Espinoza-Ayala; Gloria María Molina-Salinas; Gloria Vazquez; Hector Esteban Paz-Juárez; Hector Montoya-Fuentes; Helen Haydee Fernanda Ramirez-Plascencia; Irvin González-López; Jean Pierre González; Jesús Hernández; Joel Armando Vázquez-Pérez.; Joel Armando Vázquez-Pérez.; Joel Armando Vázquez-Pérez.; Joel Armando Vázquez-Pérez.; Jorge Ivan Salinal-Navarez; Jorge Salas-Hernández; José Antonio Enciso-Moreno; José Arturo Martínez-Orozco; José Esteban Muñoz-Medina; José de Jesús Nuñez-Contreras; Juan Bautista Chale-Dzul; Julio Elias Alvarado-Yaah; Julissa Enciso-Ibarra; Kathia Elizabeth Tapia-Díaz; Luis Alberto Ochoa-Carrera; Margarita Matías-Florentino; Mario Mújica-Sánchez; Marissa Perez-García; María Guadalupe Santiago-Mauricio; María Guadalupe de Jesús Mireles-Rivera; Nelly Sélem-Mojica; Pavel Isa; Ricardo Ciria Merce; Ricardo Grande; Rosa María Gutiérrez Ríos; Rosa María Gutiérrez Ríos; Santiago Ávila-Ríos; Selene Zárate; Susana Lopez; Verónica Mata-Haro; Víctor Eduardo García-Arias; Víctor Eduardo García-Arias; Víctor Hugo Borja-Aburto |
| EPI_ISL_1301651                                                                                                                                                                                                                                                                                                                                                                                                                                                                                             | Laboratorio Central de Epidemiología IMSS                                                                                                                                    | Instituto de Biotecnología de la UNAM                                                                                                                                                               | Alejandra Hernández-Terán; Alejandra Sanchez-Flores; Alma Rincón-Rubio; Andrea Santos Coy-Arechaveleta; Authors from IBT: Blanca Taboada; Celia Boukadida; Clara Esperanza Santacruz-Tinoco; Edgar Mendieta-Condado; Eduardo Becerri-Vargas; Fidencio Mejía-Nepomuceno; Francisco Pulido; Gisela Barrera-Badillo; Gloria Vazquez; Hector Esteban Paz-Juárez; IMSS; InDRE and INER (in alphabetical order); Carlos F. Arias; Irma Lopez-Martinez; Jerome Jean Verleyen; Joel Armando Vázquez-Pérez; Jorge Salas-Hernández; José Arturo Martínez-Orozco; José Ernesto Ramirez-González; José Esteban Muñoz-Medina; Larissa Fernandes-Matano; Lucía Hernandez-Rivas; Luis Alberto Ochoa-Carrera; Margarita Matías-Florentino; Mario Mújica-Sánchez; Nativity Cruz-Ortiz; Pavel Isa; Ricardo Grande; Santiago Ávila-Ríos; Tatiana Nunez-García; Teresita Rojas-Mendoza                                                                                                                                                                                                                                                                                                                                                                                                                                                                                                                                                                                                                                                                                                                                                                                                                                                                                                                                                                                                                                                                                     |
| EPI_ISL_3190171                                                                                                                                                                                                                                                                                                                                                                                                                                                                                             | Laboratorio Central de Saude Publica do Estado da Bahia (LACEN/BA)                                                                                                           | Laboratory of Respiratory Viruses and Measles, Oswaldo Cruz Institute, FIOCRUZ                                                                                                                      | Alice Sampaio Rocha; Ana Carolina Mendonca; Anna Carolina Paixao; Elisa Cavalcante Pereira; Felicidade Pereira; Fernando Motta; Joao Felipe Bezerra; Renata Serrano Lopes; Taina Venas                                                                                                                                                                                                                                                                                                                                                                                                                                                                                                                                                                                                                                                                                                                                                                                                                                                                                                                                                                                                                                                                                                                                                                                                                                                                                                                                                                                                                                                                                                                                                                                                                                                                                                                                                                 |
| EPI_ISL_3235242, EPI_ISL_3235244                                                                                                                                                                                                                                                                                                                                                                                                                                                                            | Laboratorio Central de Saude Publica do Estado da Paraiba (LACEN/PB)                                                                                                         | Laboratory of Respiratory Viruses and Measles, Oswaldo Cruz Institute, FIOCRUZ                                                                                                                      | Alice Sampaio Rocha; Ana Carolina Mendonca; Anna Carolina Paixao; Dalane Loudal Florentino Teixeira; Elisa Cavalcante Pereira; Fernando Motta; Joao Felipe Bezerra; Luciana Appolinario; Marilda Siqueira on behalf of the Fiocruz COVID-19 Genomic Surveillance Network; Paola Resende; Renata Serrano Lopes; Taina Venas                                                                                                                                                                                                                                                                                                                                                                                                                                                                                                                                                                                                                                                                                                                                                                                                                                                                                                                                                                                                                                                                                                                                                                                                                                                                                                                                                                                                                                                                                                                                                                                                                             |
| EPI_ISL_3190227, EPI_ISL_3190236, EPI_ISL_3190320, EPI_ISL_3190331                                                                                                                                                                                                                                                                                                                                                                                                                                          | Laboratorio Central de Saude Publica do Estado de Alagoas (LACEN/AL)                                                                                                         | Laboratory of Respiratory Viruses and Measles, Oswaldo Cruz Institute, FIOCRUZ                                                                                                                      | Agatha Cristinne Prudencio; Alice Sampaio Rocha; Ana Carolina Mendonca; Anderson Brandao Leite; Anna Carolina Paixao; Elisa Cavalcante Pereira; Fernando Motta; Igor Leonardo Arantes Gomes; Luciana Appolinario; Marilda Siqueira on behalf of the Fiocruz COVID-19 Genomic Surveillance Network; Paola Resende; Renata Serrano Lopes; Taina Venas                                                                                                                                                                                                                                                                                                                                                                                                                                                                                                                                                                                                                                                                                                                                                                                                                                                                                                                                                                                                                                                                                                                                                                                                                                                                                                                                                                                                                                                                                                                                                                                                    |
| EPI_ISL_3190221                                                                                                                                                                                                                                                                                                                                                                                                                                                                                             | Laboratorio Central de Saude Publica do Estado de Santa Catarina (LACEN/SC)                                                                                                  | Laboratory of Respiratory Viruses and Measles, Oswaldo Cruz Institute, FIOCRUZ                                                                                                                      | Alice Sampaio Rocha; Ana Carolina Mendonca; Anna Carolina Paixao; Darcita Buerger Rovaris; Elisa Cavalcante Pereira; Fernando Motta; Luciana Appolinario; Marilda Siqueira on behalf of the Fiocruz COVID-19 Genomic Surveillance Network; Paola Resende; Renata Serrano Lopes; Sandra Bianchini Fernandes; Taina Venas                                                                                                                                                                                                                                                                                                                                                                                                                                                                                                                                                                                                                                                                                                                                                                                                                                                                                                                                                                                                                                                                                                                                                                                                                                                                                                                                                                                                                                                                                                                                                                                                                                |
| EPI_ISL_3190239, EPI_ISL_3190246, EPI_ISL_3190248                                                                                                                                                                                                                                                                                                                                                                                                                                                           | Laboratorio Central de Saude Publica do Estado do Espirito Santo (LACEN/ES)                                                                                                  | Laboratory of Respiratory Viruses and Measles, Oswaldo Cruz Institute, FIOCRUZ                                                                                                                      | Alice Sampaio Rocha; Ana Carolina Mendonca; Anna Carolina Paixao; Elisa Cavalcante Pereira; Fernando Motta; Luciana Appolinario; Marilda Siqueira on behalf of the Fiocruz COVID-19 Genomic Surveillance Network; Paola Resende; Renata Serrano Lopes; Rodrigo Ribeiro Rodrigues; Taina Venas                                                                                                                                                                                                                                                                                                                                                                                                                                                                                                                                                                                                                                                                                                                                                                                                                                                                                                                                                                                                                                                                                                                                                                                                                                                                                                                                                                                                                                                                                                                                                                                                                                                          |
| EPI_ISL_3190266, EPI_ISL_3190362, EPI_ISL_3190364, EPI_ISL_3190378, EPI_ISL_3243100, EPI_ISL_4237297, EPI_ISL_6980438, EPI_ISL_7106868                                                                                                                                                                                                                                                                                                                                                                      | see above                                                                                                                                                                    | Laboratorio Central de Saude Publica do Estado do Parana (LACEN/PR)                                                                                                                                 | Agatha Soares; Alice Sampaio Rocha; Ana Carolina Mendonca; Anna Carolina Paixao; Bruna Mendonça da Silva; Elisa Cavalcante Pereira; Fernando Motta; Igor Arantes; Igor Leonardo Arantes; Irina Riediger; Jéssica Graça Macedo de Carvalho; Larissa Macedo Pinto; Luciana Appolinario; Marilda Siqueira on behalf of the Fiocruz COVID-19 Genomic Surveillance Network; Paola Resende; Renata Serrano Lopes; Taina Venas; Victor Guimaraes                                                                                                                                                                                                                                                                                                                                                                                                                                                                                                                                                                                                                                                                                                                                                                                                                                                                                                                                                                                                                                                                                                                                                                                                                                                                                                                                                                                                                                                                                                              |
| EPI_ISL_3235271                                                                                                                                                                                                                                                                                                                                                                                                                                                                                             | Laboratorio Central de Saude Publica do Estado do Rio Grande do Norte (LACEN/RN)                                                                                             | Laboratory of Respiratory Viruses and Measles, Oswaldo Cruz Institute, FIOCRUZ                                                                                                                      | Agatha Soares; Alice Sampaio Rocha; Ana Carolina Mendonca; Ana Paula Ferreira Costa; Anna Carolina Paixao; Antonny Paimielly Diogenes Lima; Aurélio de Oliveira Bento; Elisa Cavalcante Pereira; Fernando Motta; Gessika Brenna Costa Alves; Heglayne Pereira Vital da Silva; Iago de Souza Gomes; Igor Arantes; Isabelle Cristina Clemente dos Santos; Jaína Sonale Cavalcante Nogueira de Oliveira; Jayra Juliana Paiva Alves Abrantes; Jonas José da Silva; Luciana Appolinario; Marilda Siqueira on behalf of the Fiocruz COVID-19 Genomic Surveillance Network; Paola Resende; Renata Serrano Lopes; Taina Venas; Themis Rocha de Souza; Vitor Gabriel Saldanha Fernandes                                                                                                                                                                                                                                                                                                                                                                                                                                                                                                                                                                                                                                                                                                                                                                                                                                                                                                                                                                                                                                                                                                                                                                                                                                                                         |
| EPI_ISL_2661811, EPI_ISL_3235283                                                                                                                                                                                                                                                                                                                                                                                                                                                                            | Laboratorio Central de Saude Publica do Estado do Rio Grande do Sul (LACEN/RS)                                                                                               | Laboratory of Respiratory Viruses and Measles, Oswaldo Cruz Institute, FIOCRUZ                                                                                                                      | Agatha Cristinne Soares; Alice Sampaio Rocha; Ana Carolina Mendonca; Anderson Brandao Leite; Anna Carolina Paixao; Elisa Cavalcante Pereira; Fernando Motta; Igor Leonardo Arantes; Luciana Appolinario; Marilda Siqueira on behalf of the Fiocruz COVID-19 Genomic Surveillance Network; Paola Resende; Renata Serrano Lopes; Richard Salvato; Taina Venas; Tatiana Schaffer Gregiani                                                                                                                                                                                                                                                                                                                                                                                                                                                                                                                                                                                                                                                                                                                                                                                                                                                                                                                                                                                                                                                                                                                                                                                                                                                                                                                                                                                                                                                                                                                                                                 |
| EPI_ISL_3087171                                                                                                                                                                                                                                                                                                                                                                                                                                                                                             | Laboratorio Central de Saude Publica do Estado do Rio Grande do Sul (LACEN-RS)                                                                                               | Laboratório de Biologia Molecular da Universidade Federal de Ciências da Saúde de Porto Alegre                                                                                                      | Adriana Seixas; Ana B. G. Veiga; Ana Paula Mutterle Varela; Fabiana Quos Mayer; Fernando Hayashi Sant'Anna; Janira Prichula; Leticia Garay Martins; Richard Steiner Salvato; Tatiana Schäffer Gregiani                                                                                                                                                                                                                                                                                                                                                                                                                                                                                                                                                                                                                                                                                                                                                                                                                                                                                                                                                                                                                                                                                                                                                                                                                                                                                                                                                                                                                                                                                                                                                                                                                                                                                                                                                 |
| EPI_ISL_3260102                                                                                                                                                                                                                                                                                                                                                                                                                                                                                             | Laboratorio Central de la Ciudad de Santa Fe                                                                                                                                 | Grupo de Genómica y Bioinformática del Instituto de Investigación de la Cadena Láctea CONICET-INTA on behalf of 'Proyecto Argentino Interinstitucional de genómica de SARS-CoV-2' (PAIS Consortium) | AF; Amadio; C; Eberhardt; G; Irazoqui; JM; MF; Mugna; Ojeda; Pastor; Rompató; V                                                                                                                                                                                                                                                                                                                                                                                                                                                                                                                                                                                                                                                                                                                                                                                                                                                                                                                                                                                                                                                                                                                                                                                                                                                                                                                                                                                                                                                                                                                                                                                                                                                                                                                                                                                                                                                                        |
| EPI_ISL_4417619                                                                                                                                                                                                                                                                                                                                                                                                                                                                                             | Laboratorio Clinica Iberoamericana (Sanitas)                                                                                                                                 | Centro de Investigaciones en Microbiología y Biotecnología-UR (CIMBIUR), Facultad de Ciencias Naturales, Universidad del Rosario, Bogotá, Colombia                                                  | Angie Ramirez; Juan David Ramirez; Luz H. Patiño; Marcela Mercado-Reyes; Marina Muñoz; Nathalia Ballesteros; Nicolas Niño; Sergio Castañeda                                                                                                                                                                                                                                                                                                                                                                                                                                                                                                                                                                                                                                                                                                                                                                                                                                                                                                                                                                                                                                                                                                                                                                                                                                                                                                                                                                                                                                                                                                                                                                                                                                                                                                                                                                                                            |
| EPI_ISL_5063063                                                                                                                                                                                                                                                                                                                                                                                                                                                                                             | Laboratorio Direccion Sanidad Policia Nacional                                                                                                                               | Centro de Investigaciones en Microbiología y Biotecnología-UR (CIMBIUR), Facultad de Ciencias Naturales, Universidad del Rosario, Bogotá, Colombia                                                  | Angie Ramirez; Juan David Ramirez; Luz H. Patiño; Marcela Mercado-Reyes; Marina Muñoz; Nathalia Ballesteros; Nicolas Niño; Sergio Castañeda                                                                                                                                                                                                                                                                                                                                                                                                                                                                                                                                                                                                                                                                                                                                                                                                                                                                                                                                                                                                                                                                                                                                                                                                                                                                                                                                                                                                                                                                                                                                                                                                                                                                                                                                                                                                            |
| EPI_ISL_4984847                                                                                                                                                                                                                                                                                                                                                                                                                                                                                             | Laboratorio Docente Asistencial                                                                                                                                              | Laboratorio Departamental de Salud Publica de Antioquia                                                                                                                                             | Andres F. Cardona-Rios; Cristian Arbey Velarde Hoyos; Gloria Isabel Escobar; Idabely Betancur Ortiz; Juan P. Hernandez-Ortiz; Maria Stella López                                                                                                                                                                                                                                                                                                                                                                                                                                                                                                                                                                                                                                                                                                                                                                                                                                                                                                                                                                                                                                                                                                                                                                                                                                                                                                                                                                                                                                                                                                                                                                                                                                                                                                                                                                                                       |
| EPI_ISL_2139523                                                                                                                                                                                                                                                                                                                                                                                                                                                                                             | Laboratorio Exame                                                                                                                                                            | Universidade Federal de Ciencias da Saude de Porto Alegre                                                                                                                                           | Gabriel Dickin Caldana et al.; Vinicius Bonetti Franceschi                                                                                                                                                                                                                                                                                                                                                                                                                                                                                                                                                                                                                                                                                                                                                                                                                                                                                                                                                                                                                                                                                                                                                                                                                                                                                                                                                                                                                                                                                                                                                                                                                                                                                                                                                                                                                                                                                             |
| EPI_ISL_3275184, EPI_ISL_3275201, EPI_ISL_3275215, EPI_ISL_3275243                                                                                                                                                                                                                                                                                                                                                                                                                                          | Laboratorio Nacional de Salud, Ministerio de Salud Publica y Asistencia Social                                                                                               | Genomics and Proteomics Department, Gorgas Memorial Institute For Health Studies                                                                                                                    | Alexander A Martinez; Ambar Moreno; Claudia Estrada; Claudia Gonzalez V; César Roberto Conde Pereira; Jessica Gondola; Leyda Abrego; Marlene Castillo; Oris Chavarria                                                                                                                                                                                                                                                                                                                                                                                                                                                                                                                                                                                                                                                                                                                                                                                                                                                                                                                                                                                                                                                                                                                                                                                                                                                                                                                                                                                                                                                                                                                                                                                                                                                                                                                                                                                  |
| EPI_ISL_6703122, EPI_ISL_5199336                                                                                                                                                                                                                                                                                                                                                                                                                                                                            | Laboratorio SYNLAB Colombia                                                                                                                                                  | CIAT, Laboratorio de Virologia                                                                                                                                                                      | Ana M. Leiva; Diana Lopez-Alvarez; Programa Nacional de Caracterización Genómica de SARS-CoV-2; WilmerJ. Cuellar                                                                                                                                                                                                                                                                                                                                                                                                                                                                                                                                                                                                                                                                                                                                                                                                                                                                                                                                                                                                                                                                                                                                                                                                                                                                                                                                                                                                                                                                                                                                                                                                                                                                                                                                                                                                                                       |
| EPI_ISL_6703113, EPI_ISL_6703133                                                                                                                                                                                                                                                                                                                                                                                                                                                                            | Laboratorio SINERGIA Global                                                                                                                                                  | CIAT, Laboratorio de Virologia                                                                                                                                                                      | Ana M. Leiva; Diana Lopez-Alvarez; Programa Nacional de Caracterización Genómica de SARS-CoV-2; WilmerJ. Cuellar                                                                                                                                                                                                                                                                                                                                                                                                                                                                                                                                                                                                                                                                                                                                                                                                                                                                                                                                                                                                                                                                                                                                                                                                                                                                                                                                                                                                                                                                                                                                                                                                                                                                                                                                                                                                                                       |
| EPI_ISL_5687888                                                                                                                                                                                                                                                                                                                                                                                                                                                                                             | Laboratorio Unico Metropolitano (LUM)                                                                                                                                        | Laboratory of Medical Microbiology, University of Antwerp                                                                                                                                           | Basil Britto Xavier; Evelina Tacconelli; Maddalena Giannella; Mathias Smet; Matilda Berkel; Surbhi Malhotra-Kumar                                                                                                                                                                                                                                                                                                                                                                                                                                                                                                                                                                                                                                                                                                                                                                                                                                                                                                                                                                                                                                                                                                                                                                                                                                                                                                                                                                                                                                                                                                                                                                                                                                                                                                                                                                                                                                      |
| EPI_ISL_4820966, EPI_ISL_4820981                                                                                                                                                                                                                                                                                                                                                                                                                                                                            | Laboratorio de Biología Molecular de la Universidad Nacional de San Agustín de Arequipa                                                                                      | Laboratorio de Recursos Genéticos y Genética Molecular de la Universidad Nacional de San Agustín de Arequipa                                                                                        | Alejandra Dávila; Guillermo Salvatierra; Jorge Ballón; Kasandra Ascuña; Pablo Tsukayama; Patrick Fernández; Renzo Salazar; Rosario Valderrama; Sandro Condiri                                                                                                                                                                                                                                                                                                                                                                                                                                                                                                                                                                                                                                                                                                                                                                                                                                                                                                                                                                                                                                                                                                                                                                                                                                                                                                                                                                                                                                                                                                                                                                                                                                                                                                                                                                                          |
| EPI_ISL_5858718, EPI_ISL_417034, EPI_ISL_4030315                                                                                                                                                                                                                                                                                                                                                                                                                                                            | Laboratorio de Diagnóstico de Agentes Biológicos- LDAB<br>Laboratorio de Ecologia de Doencas Transmissíveis na Amazonia, Instituto Leonidas e Maria Deane - Fiocruz Amazonia | Universidad del Valle<br>Laboratorio de Ecologia de Doencas Transmissíveis na Amazonia, Instituto Leonidas e Maria Deane - Fiocruz Amazonia                                                         | Andres Castillo; Beatriz Parra & Programa Nacional de Caracterización Genómica de SARS-CoV-2; Diana López-Alvarez; Erica M. Aristizabal; Flor Saa; Melissa Solarte; Nelson Rivera Franco<br>Alex Martins; André Corado; Debora Duarte; Fabiola Mendonça da Silva Chui; Felipe Naveca; Felipe Naveca on behalf of the Fiocruz COVID-19 Genomic Surveillance Network; Fernanda Nascimento; Fernando Fonseca de Almeida Val; George Silva; Giseley Cardoso de Melo; Karina Pessoa; Luciana Gonçalves; Marcus Vinicius Guimaraes de Lacerda; Maria Júlia Brandão; Maria Paula Gomes Mourão; Mariana Xavier Simão; Matilde Mejia; Michele Jesus; Sérgio Luz; Valdinete Nascimento; Vanderson de Souza Sampaio; Victor Souza; Agatha Costa                                                                                                                                                                                                                                                                                                                                                                                                                                                                                                                                                                                                                                                                                                                                                                                                                                                                                                                                                                                                                                                                                                                                                                                                                   |
| EPI_ISL_3321272,                                                                                                                                                                                                                                                                                                                                                                                                                                                                                            | Laboratorio de Infectologia y Virologia Molecular                                                                                                                            | Laboratory of Molecular Virology,                                                                                                                                                                   | Ana Maria Contreras; Andres E. Munoz-Marcos; Carlos Palma; Catalina Parco-Roa; Constanza Maldonado; Constanza Martinez-Valdevenito; Eileen Serrano; Erick Salinas; Estefany Poblete; Eugenia L. Fuentes Luppichini; Francisco Melo; Jennifer Angulo;                                                                                                                                                                                                                                                                                                                                                                                                                                                                                                                                                                                                                                                                                                                                                                                                                                                                                                                                                                                                                                                                                                                                                                                                                                                                                                                                                                                                                                                                                                                                                                                                                                                                                                   |

|                                                                                                                                                                                                                                                                                                                                                                                                                                                                                                                                                                                                                                                                                                                                                                                                                                                                                                                                                                                                                                                                                                                                                                                                                                                                                                                                                                                                                                                                                                                                                                                                                                                                                                                                                                                                                                                                                                                                                                                                                                                                                                                                                                                                                                                                                                                                                                                                                                                                                                                                                                                                                                                                                                                                                                                                                                                                                                                                                                                                                                                                                                                                                                                                                                                                                                                                                                                                                                                                                     |                                                                                                                                                                                                                                                                                                                                                                                                                                                                                                                                                                                                                                                                                                                                                                                                                                                                                                                                                                                                                                                                                                                                                                                                                                              |                                                                                                                                                                                                                    |                                                                                                                                                                                                                                                                                                                                    |
|-------------------------------------------------------------------------------------------------------------------------------------------------------------------------------------------------------------------------------------------------------------------------------------------------------------------------------------------------------------------------------------------------------------------------------------------------------------------------------------------------------------------------------------------------------------------------------------------------------------------------------------------------------------------------------------------------------------------------------------------------------------------------------------------------------------------------------------------------------------------------------------------------------------------------------------------------------------------------------------------------------------------------------------------------------------------------------------------------------------------------------------------------------------------------------------------------------------------------------------------------------------------------------------------------------------------------------------------------------------------------------------------------------------------------------------------------------------------------------------------------------------------------------------------------------------------------------------------------------------------------------------------------------------------------------------------------------------------------------------------------------------------------------------------------------------------------------------------------------------------------------------------------------------------------------------------------------------------------------------------------------------------------------------------------------------------------------------------------------------------------------------------------------------------------------------------------------------------------------------------------------------------------------------------------------------------------------------------------------------------------------------------------------------------------------------------------------------------------------------------------------------------------------------------------------------------------------------------------------------------------------------------------------------------------------------------------------------------------------------------------------------------------------------------------------------------------------------------------------------------------------------------------------------------------------------------------------------------------------------------------------------------------------------------------------------------------------------------------------------------------------------------------------------------------------------------------------------------------------------------------------------------------------------------------------------------------------------------------------------------------------------------------------------------------------------------------------------------------------------|----------------------------------------------------------------------------------------------------------------------------------------------------------------------------------------------------------------------------------------------------------------------------------------------------------------------------------------------------------------------------------------------------------------------------------------------------------------------------------------------------------------------------------------------------------------------------------------------------------------------------------------------------------------------------------------------------------------------------------------------------------------------------------------------------------------------------------------------------------------------------------------------------------------------------------------------------------------------------------------------------------------------------------------------------------------------------------------------------------------------------------------------------------------------------------------------------------------------------------------------|--------------------------------------------------------------------------------------------------------------------------------------------------------------------------------------------------------------------|------------------------------------------------------------------------------------------------------------------------------------------------------------------------------------------------------------------------------------------------------------------------------------------------------------------------------------|
| EPI_ISL_4391690,<br>EPI_ISL_4890167,<br>EPI_ISL_6632956,<br>EPI_ISL_6633137,<br>EPI_ISL_6633367                                                                                                                                                                                                                                                                                                                                                                                                                                                                                                                                                                                                                                                                                                                                                                                                                                                                                                                                                                                                                                                                                                                                                                                                                                                                                                                                                                                                                                                                                                                                                                                                                                                                                                                                                                                                                                                                                                                                                                                                                                                                                                                                                                                                                                                                                                                                                                                                                                                                                                                                                                                                                                                                                                                                                                                                                                                                                                                                                                                                                                                                                                                                                                                                                                                                                                                                                                                     |                                                                                                                                                                                                                                                                                                                                                                                                                                                                                                                                                                                                                                                                                                                                                                                                                                                                                                                                                                                                                                                                                                                                                                                                                                              | School of Medicine, Pontificia Universidad Católica de Chile                                                                                                                                                       | Jorge Levican; Leonardo I. Almonacid; M. Belen Leyton; Marcela Ferrer; Maria Jose Avendano; Rafael A. Medina; Rafael A. Medina.; Tamara Garcia-Salum                                                                                                                                                                               |
| EPI_ISL_2016351                                                                                                                                                                                                                                                                                                                                                                                                                                                                                                                                                                                                                                                                                                                                                                                                                                                                                                                                                                                                                                                                                                                                                                                                                                                                                                                                                                                                                                                                                                                                                                                                                                                                                                                                                                                                                                                                                                                                                                                                                                                                                                                                                                                                                                                                                                                                                                                                                                                                                                                                                                                                                                                                                                                                                                                                                                                                                                                                                                                                                                                                                                                                                                                                                                                                                                                                                                                                                                                                     | Laboratorio de Microbiología, Hospital Marina Baixa, Villajoyosa                                                                                                                                                                                                                                                                                                                                                                                                                                                                                                                                                                                                                                                                                                                                                                                                                                                                                                                                                                                                                                                                                                                                                                             | SeqCOVID-SPAIN consortium/IBV(CSIC)                                                                                                                                                                                | Bárbara Gomez Alonso; Carmen Martínez Peinado and SeqCOVID-SPAIN consortium; Francisco José Arjona Zaragoza; Mónica Parra Grande                                                                                                                                                                                                   |
| EPI_ISL_925173                                                                                                                                                                                                                                                                                                                                                                                                                                                                                                                                                                                                                                                                                                                                                                                                                                                                                                                                                                                                                                                                                                                                                                                                                                                                                                                                                                                                                                                                                                                                                                                                                                                                                                                                                                                                                                                                                                                                                                                                                                                                                                                                                                                                                                                                                                                                                                                                                                                                                                                                                                                                                                                                                                                                                                                                                                                                                                                                                                                                                                                                                                                                                                                                                                                                                                                                                                                                                                                                      | Laboratorio de Referencia Nacional de Enteropatógenos. Instituto Nacional de Salud del Perú                                                                                                                                                                                                                                                                                                                                                                                                                                                                                                                                                                                                                                                                                                                                                                                                                                                                                                                                                                                                                                                                                                                                                  | Laboratorio de Referencia Nacional de Enteropatógenos. Instituto Nacional de Salud del Perú                                                                                                                        | ; Fiorella Orellana Peralta; Iris Silva Molina; Junior Caro Castro; Ronnie Gavilan Chavez; Veronica Hurtado Vela; Willi Quino Sifuentes                                                                                                                                                                                            |
| EPI_ISL_1111198,<br>EPI_ISL_1111235,<br>EPI_ISL_1111259,<br>EPI_ISL_1111303,<br>EPI_ISL_1111364                                                                                                                                                                                                                                                                                                                                                                                                                                                                                                                                                                                                                                                                                                                                                                                                                                                                                                                                                                                                                                                                                                                                                                                                                                                                                                                                                                                                                                                                                                                                                                                                                                                                                                                                                                                                                                                                                                                                                                                                                                                                                                                                                                                                                                                                                                                                                                                                                                                                                                                                                                                                                                                                                                                                                                                                                                                                                                                                                                                                                                                                                                                                                                                                                                                                                                                                                                                     | Laboratorio de Referencia Nacional de Virus Respiratorio. Instituto Nacional de Salud Perú                                                                                                                                                                                                                                                                                                                                                                                                                                                                                                                                                                                                                                                                                                                                                                                                                                                                                                                                                                                                                                                                                                                                                   | Laboratorio de Referencia Nacional de Enteropatógenos. Instituto Nacional de Salud del Perú                                                                                                                        | Fiorella Orellana Peralta; Iris Silva Molina; Junior Caro Castro; Ronnie Gavilan Chavez; Veronica Hurtado Vela; Willi Quino Sifuentes                                                                                                                                                                                              |
| EPI_ISL_1629786                                                                                                                                                                                                                                                                                                                                                                                                                                                                                                                                                                                                                                                                                                                                                                                                                                                                                                                                                                                                                                                                                                                                                                                                                                                                                                                                                                                                                                                                                                                                                                                                                                                                                                                                                                                                                                                                                                                                                                                                                                                                                                                                                                                                                                                                                                                                                                                                                                                                                                                                                                                                                                                                                                                                                                                                                                                                                                                                                                                                                                                                                                                                                                                                                                                                                                                                                                                                                                                                     | Laboratorio de Referencia Nacional de Virus Respiratorios, Instituto Nacional de Salud Peru                                                                                                                                                                                                                                                                                                                                                                                                                                                                                                                                                                                                                                                                                                                                                                                                                                                                                                                                                                                                                                                                                                                                                  | Laboratorio de Genómica Microbiana, Universidad Peruana Cayetano Heredia                                                                                                                                           | Alejandra Dávila-Barclay; Diego Cuicapuza; Guillermo Salvatierra; Janet Huancachoque; Lenin Maturrano; Luis González; Maribel Huaringa; Nancy Rojas; Pablo Tsukayama; Pedro E. Romero; Pool Marcos; Priscilla Lope                                                                                                                 |
| EPI_ISL_4821006                                                                                                                                                                                                                                                                                                                                                                                                                                                                                                                                                                                                                                                                                                                                                                                                                                                                                                                                                                                                                                                                                                                                                                                                                                                                                                                                                                                                                                                                                                                                                                                                                                                                                                                                                                                                                                                                                                                                                                                                                                                                                                                                                                                                                                                                                                                                                                                                                                                                                                                                                                                                                                                                                                                                                                                                                                                                                                                                                                                                                                                                                                                                                                                                                                                                                                                                                                                                                                                                     | Laboratorio de Referencia Regional Arequipa                                                                                                                                                                                                                                                                                                                                                                                                                                                                                                                                                                                                                                                                                                                                                                                                                                                                                                                                                                                                                                                                                                                                                                                                  | Laboratorio de Recursos Genéticos y Genética Molecular de la Universidad Nacional de San Agustín de Arequipa                                                                                                       | Alejandra Dávila; Guillermo Salvatierra; Jorge Ballón; Kasandra Ascuña; Pablo Tsukayama; Patrick Fernández; Renzo Salazar; Rosario Valderrama; Sandro Condori                                                                                                                                                                      |
| EPI_ISL_3275272, EPI_ISL_3275278, EPI_ISL_3275319, EPI_ISL_3275320, EPI_ISL_3275335, EPI_ISL_3275341, EPI_ISL_3275342                                                                                                                                                                                                                                                                                                                                                                                                                                                                                                                                                                                                                                                                                                                                                                                                                                                                                                                                                                                                                                                                                                                                                                                                                                                                                                                                                                                                                                                                                                                                                                                                                                                                                                                                                                                                                                                                                                                                                                                                                                                                                                                                                                                                                                                                                                                                                                                                                                                                                                                                                                                                                                                                                                                                                                                                                                                                                                                                                                                                                                                                                                                                                                                                                                                                                                                                                               | see above                                                                                                                                                                                                                                                                                                                                                                                                                                                                                                                                                                                                                                                                                                                                                                                                                                                                                                                                                                                                                                                                                                                                                                                                                                    | Laboratorio de Vigilancia en Salud Pública el Salvador                                                                                                                                                             | Genomics and Proteomics Department, Gorgas Memorial Institute For Health Studies                                                                                                                                                                                                                                                   |
| EPI_ISL_623144                                                                                                                                                                                                                                                                                                                                                                                                                                                                                                                                                                                                                                                                                                                                                                                                                                                                                                                                                                                                                                                                                                                                                                                                                                                                                                                                                                                                                                                                                                                                                                                                                                                                                                                                                                                                                                                                                                                                                                                                                                                                                                                                                                                                                                                                                                                                                                                                                                                                                                                                                                                                                                                                                                                                                                                                                                                                                                                                                                                                                                                                                                                                                                                                                                                                                                                                                                                                                                                                      | Laboratorio de Virologia Molecular / UFRJ                                                                                                                                                                                                                                                                                                                                                                                                                                                                                                                                                                                                                                                                                                                                                                                                                                                                                                                                                                                                                                                                                                                                                                                                    | Bioinformatics Laboratory / LNCC                                                                                                                                                                                   | Alexandra L Gerber; Amílcar Tanuri; Ana Paula de C Guimarães; Ana Tereza R de Vasconcelos; Carolina M Voloch; Covid19-UFRJ Workgroup; Cynthia C Cardoso; Diana Mariani; Luiz G P de Almeida; Luís Cristóvão Pôrto; Orlando C. Ferreira; Otavio J. Brustolini; Renato S Aguiar; Ronaldo S Francisco Jr; Terezinha M P P Castifeiras |
| EPI_ISL_1673665                                                                                                                                                                                                                                                                                                                                                                                                                                                                                                                                                                                                                                                                                                                                                                                                                                                                                                                                                                                                                                                                                                                                                                                                                                                                                                                                                                                                                                                                                                                                                                                                                                                                                                                                                                                                                                                                                                                                                                                                                                                                                                                                                                                                                                                                                                                                                                                                                                                                                                                                                                                                                                                                                                                                                                                                                                                                                                                                                                                                                                                                                                                                                                                                                                                                                                                                                                                                                                                                     | Laboratorio de Virología HUCA                                                                                                                                                                                                                                                                                                                                                                                                                                                                                                                                                                                                                                                                                                                                                                                                                                                                                                                                                                                                                                                                                                                                                                                                                | Laboratorio de Virología HUCA                                                                                                                                                                                      | Abreu F; Alvarez-Arguelles ME; Boga JA; Castelló C; Costales I; Coto E; Gómez de Oña J; Martín-Rodríguez G; Melón S; Perez-Martínez Z; Rojo S; Sandoval M                                                                                                                                                                          |
| EPI_ISL_1396095                                                                                                                                                                                                                                                                                                                                                                                                                                                                                                                                                                                                                                                                                                                                                                                                                                                                                                                                                                                                                                                                                                                                                                                                                                                                                                                                                                                                                                                                                                                                                                                                                                                                                                                                                                                                                                                                                                                                                                                                                                                                                                                                                                                                                                                                                                                                                                                                                                                                                                                                                                                                                                                                                                                                                                                                                                                                                                                                                                                                                                                                                                                                                                                                                                                                                                                                                                                                                                                                     | Laboratorio de Virus Respiratorios y Neurovirosis. Hospital Señor del Milagro                                                                                                                                                                                                                                                                                                                                                                                                                                                                                                                                                                                                                                                                                                                                                                                                                                                                                                                                                                                                                                                                                                                                                                | Instituto de Patología Vegetal (CIAP-INTA) on behalf of Proyecto Argentino Interinstitucional de genómica de SARS-CoV-2 (PAIS Consortium)                                                                          | A. Dra. Raskovsky Viviana; Amadio; Debat, HJ.; Dr. Lavaque Esteban; Dra. Veronica Lesser. Tecnica; Pamela Cajal; FD; Fernanda Agüero.; Fernández; Irazoqui, M.; Marquez, N.                                                                                                                                                        |
| EPI_ISL_413489                                                                                                                                                                                                                                                                                                                                                                                                                                                                                                                                                                                                                                                                                                                                                                                                                                                                                                                                                                                                                                                                                                                                                                                                                                                                                                                                                                                                                                                                                                                                                                                                                                                                                                                                                                                                                                                                                                                                                                                                                                                                                                                                                                                                                                                                                                                                                                                                                                                                                                                                                                                                                                                                                                                                                                                                                                                                                                                                                                                                                                                                                                                                                                                                                                                                                                                                                                                                                                                                      | Laboratorio di Microbiologia e Virologia, Università Vita-Salute San Raffaele, Milano                                                                                                                                                                                                                                                                                                                                                                                                                                                                                                                                                                                                                                                                                                                                                                                                                                                                                                                                                                                                                                                                                                                                                        | Laboratorio di Microbiologia e Virologia, Università Vita-Salute San Raffaele, Milano                                                                                                                              | C. Di Resta; E. Boeri; E. Criscuolo; G. Lo Raso; I. Negri; M. Castelli; M. Clementi; M. Sampaolo; N. Mancini & N. Clementi; R. Burioni; R. Ferraresi; R.A Diotti; V. Amato; V. Caputo                                                                                                                                              |
| EPI_ISL_985029                                                                                                                                                                                                                                                                                                                                                                                                                                                                                                                                                                                                                                                                                                                                                                                                                                                                                                                                                                                                                                                                                                                                                                                                                                                                                                                                                                                                                                                                                                                                                                                                                                                                                                                                                                                                                                                                                                                                                                                                                                                                                                                                                                                                                                                                                                                                                                                                                                                                                                                                                                                                                                                                                                                                                                                                                                                                                                                                                                                                                                                                                                                                                                                                                                                                                                                                                                                                                                                                      | Laboratorio di Patologia Clinica, Ospedale San Paolo in Valloria, ASL 2 Liguria                                                                                                                                                                                                                                                                                                                                                                                                                                                                                                                                                                                                                                                                                                                                                                                                                                                                                                                                                                                                                                                                                                                                                              | U.O. Igiene, Ospedale Policlinico San Martino                                                                                                                                                                      | Bruzzoze Bianca; Caligiuri Patrizia; De Pace Vanessa; Domnich Alexander; Icardi Giancarlo; Lillo Flavia; Orsi Andrea; Ricucci Valentina                                                                                                                                                                                            |
| EPI_ISL_1745789                                                                                                                                                                                                                                                                                                                                                                                                                                                                                                                                                                                                                                                                                                                                                                                                                                                                                                                                                                                                                                                                                                                                                                                                                                                                                                                                                                                                                                                                                                                                                                                                                                                                                                                                                                                                                                                                                                                                                                                                                                                                                                                                                                                                                                                                                                                                                                                                                                                                                                                                                                                                                                                                                                                                                                                                                                                                                                                                                                                                                                                                                                                                                                                                                                                                                                                                                                                                                                                                     | Laboratorium Badawczo-Rozwojowe Vitagenum                                                                                                                                                                                                                                                                                                                                                                                                                                                                                                                                                                                                                                                                                                                                                                                                                                                                                                                                                                                                                                                                                                                                                                                                    | 1. National Institute of Public Health - National Institute of Hygiene; 2. Eurofins Genomics Europe Sequencing GmbH                                                                                                | ECDC COVID-19 WGS support team; Eurofins Genomics Europe Sequencing Team; Gierczyński Rafał; Sadkowska-Todys Malgorzata; Wolkowicz Tomasz; Zacharczuk Katarzyna                                                                                                                                                                    |
| EPI_ISL_2140265                                                                                                                                                                                                                                                                                                                                                                                                                                                                                                                                                                                                                                                                                                                                                                                                                                                                                                                                                                                                                                                                                                                                                                                                                                                                                                                                                                                                                                                                                                                                                                                                                                                                                                                                                                                                                                                                                                                                                                                                                                                                                                                                                                                                                                                                                                                                                                                                                                                                                                                                                                                                                                                                                                                                                                                                                                                                                                                                                                                                                                                                                                                                                                                                                                                                                                                                                                                                                                                                     | Laboratorium Epidemiologii WSSE w Szczecinie                                                                                                                                                                                                                                                                                                                                                                                                                                                                                                                                                                                                                                                                                                                                                                                                                                                                                                                                                                                                                                                                                                                                                                                                 | 1. Tricity SARS-CoV-2 sequencing consortium: University of Gdansk, Medical University of Gdansk, Vaxican Ltd., Invicta Ltd. 2. National Institute of Public Health - National Institute of Hygiene, Warsaw, Poland | Celina Cybulska; Karolina Gackowska; Katarzyna Groth; Katarzyna Zacharczuk; Krystyna Bienkowska Szewczyk; Lukasz Rabalski; Maciej Grzybek; Maciej Kosinski; Magdalena Nowakowska; Malgorzata Sadkowska-Todys; Tomasz Wolkowicz                                                                                                     |
| EPI_ISL_1539071                                                                                                                                                                                                                                                                                                                                                                                                                                                                                                                                                                                                                                                                                                                                                                                                                                                                                                                                                                                                                                                                                                                                                                                                                                                                                                                                                                                                                                                                                                                                                                                                                                                                                                                                                                                                                                                                                                                                                                                                                                                                                                                                                                                                                                                                                                                                                                                                                                                                                                                                                                                                                                                                                                                                                                                                                                                                                                                                                                                                                                                                                                                                                                                                                                                                                                                                                                                                                                                                     | Laboratorium Medyczne BIOLAB                                                                                                                                                                                                                                                                                                                                                                                                                                                                                                                                                                                                                                                                                                                                                                                                                                                                                                                                                                                                                                                                                                                                                                                                                 | 1. National Institute of Public Health - National Institute of Hygiene; 2. Eurofins Genomics Europe Sequencing GmbH                                                                                                | ECDC COVID-19 WGS support team; Eurofins Genomics Europe Sequencing Team; Gierczyński Rafał; Sadkowska-Todys Malgorzata; Wolkowicz Tomasz; Zacharczuk Katarzyna                                                                                                                                                                    |
| EPI_ISL_832194                                                                                                                                                                                                                                                                                                                                                                                                                                                                                                                                                                                                                                                                                                                                                                                                                                                                                                                                                                                                                                                                                                                                                                                                                                                                                                                                                                                                                                                                                                                                                                                                                                                                                                                                                                                                                                                                                                                                                                                                                                                                                                                                                                                                                                                                                                                                                                                                                                                                                                                                                                                                                                                                                                                                                                                                                                                                                                                                                                                                                                                                                                                                                                                                                                                                                                                                                                                                                                                                      | Laboratory Analyses Med                                                                                                                                                                                                                                                                                                                                                                                                                                                                                                                                                                                                                                                                                                                                                                                                                                                                                                                                                                                                                                                                                                                                                                                                                      | National Reference Center for Viruses of Respiratory Infections, Institut Pasteur, Paris                                                                                                                           | Angela Brisebarre; Briec Gestin; Camille Cape; Etienne Simon-Lorière; Marion Barbet; Maud Vanpeene; Méline Bizard; Sylvie Behillil; Sylvie van der Werf; Vincent Enouf                                                                                                                                                             |
| EPI_ISL_1421867, EPI_ISL_1462725, EPI_ISL_1462779, EPI_ISL_1462992, EPI_ISL_1481354, EPI_ISL_1514268, EPI_ISL_1548178, EPI_ISL_1548477, EPI_ISL_1548634, EPI_ISL_1549234, EPI_ISL_1549441, EPI_ISL_1609008, EPI_ISL_1609150, EPI_ISL_1609279, EPI_ISL_1609462, EPI_ISL_1609505, EPI_ISL_1609599, EPI_ISL_1610117, EPI_ISL_1610489, EPI_ISL_1610681, EPI_ISL_1611283, EPI_ISL_1611357, EPI_ISL_1611646, EPI_ISL_1612575, EPI_ISL_1680864, EPI_ISL_1681086, EPI_ISL_1681506, EPI_ISL_1681511, EPI_ISL_1681968, EPI_ISL_1682141, EPI_ISL_1682552, EPI_ISL_1683724, EPI_ISL_1684555, EPI_ISL_1684601, EPI_ISL_1684868, EPI_ISL_1798923, EPI_ISL_1799220, EPI_ISL_1799441, EPI_ISL_1800106, EPI_ISL_1800237, EPI_ISL_1800369, EPI_ISL_1800452, EPI_ISL_1800670, EPI_ISL_1801062, EPI_ISL_1801972, EPI_ISL_1802074, EPI_ISL_1802423, EPI_ISL_1926367, EPI_ISL_1928784, EPI_ISL_1931832, EPI_ISL_2045255, EPI_ISL_2045938, EPI_ISL_2183134, EPI_ISL_2185074, EPI_ISL_3328979, EPI_ISL_4372578, EPI_ISL_4372582, EPI_ISL_4372651, EPI_ISL_4372657, EPI_ISL_4372690, EPI_ISL_4372734, EPI_ISL_4372751, EPI_ISL_4372808, EPI_ISL_4372826, EPI_ISL_4372890, EPI_ISL_4372900, EPI_ISL_4372929, EPI_ISL_4372971, EPI_ISL_4372981, EPI_ISL_4373005, EPI_ISL_4373116, EPI_ISL_4373125, EPI_ISL_4373164, EPI_ISL_4373188, EPI_ISL_4373217, EPI_ISL_4373219, EPI_ISL_4373250, EPI_ISL_4373286, EPI_ISL_4373336, EPI_ISL_4373345, EPI_ISL_4373349, EPI_ISL_4373449, EPI_ISL_4373487, EPI_ISL_4373603, EPI_ISL_4373632, EPI_ISL_4373676, EPI_ISL_4373874, EPI_ISL_4373890, EPI_ISL_4373932, EPI_ISL_4374023, EPI_ISL_4374091, EPI_ISL_4374311, EPI_ISL_4374318, EPI_ISL_4374343, EPI_ISL_4374364, EPI_ISL_4374387, EPI_ISL_4374432, EPI_ISL_4374445, EPI_ISL_4374462, EPI_ISL_4374476, EPI_ISL_4374877, EPI_ISL_4374885, EPI_ISL_4374908, EPI_ISL_4374920, EPI_ISL_4374958, EPI_ISL_4374961, EPI_ISL_4374983, EPI_ISL_4375010, EPI_ISL_4375016, EPI_ISL_4375103, EPI_ISL_4375123, EPI_ISL_4375148, EPI_ISL_4375224, EPI_ISL_4375358, EPI_ISL_4375426, EPI_ISL_4375493, EPI_ISL_4375532, EPI_ISL_4375547, EPI_ISL_4375625, EPI_ISL_4375645, EPI_ISL_4375704, EPI_ISL_4375752, EPI_ISL_4375754, EPI_ISL_4375756, EPI_ISL_4375759, EPI_ISL_4375768, EPI_ISL_4375818, EPI_ISL_4375879, EPI_ISL_4375881, EPI_ISL_4375890, EPI_ISL_4375930, EPI_ISL_4375934, EPI_ISL_4375962, EPI_ISL_4375991, EPI_ISL_4376039, EPI_ISL_4376177, EPI_ISL_4376195, EPI_ISL_4376200, EPI_ISL_4376227, EPI_ISL_4376239, EPI_ISL_4376323, EPI_ISL_4376341, EPI_ISL_4376453, EPI_ISL_4376555, EPI_ISL_4376571, EPI_ISL_4376580, EPI_ISL_4376745, EPI_ISL_4376752, EPI_ISL_4376784, EPI_ISL_4377078, EPI_ISL_4377121, EPI_ISL_4377161, EPI_ISL_4377200, EPI_ISL_4377504, EPI_ISL_4377643, EPI_ISL_4377727, EPI_ISL_4377857, EPI_ISL_4377961, EPI_ISL_4377977, EPI_ISL_4377993, EPI_ISL_4378093, EPI_ISL_4378099, EPI_ISL_4378114, EPI_ISL_4378129, EPI_ISL_4378232, EPI_ISL_4378255, EPI_ISL_4378260, EPI_ISL_4378302, EPI_ISL_4378322, EPI_ISL_4378340, EPI_ISL_4378355, EPI_ISL_4378427, EPI_ISL_4378544, EPI_ISL_4378566, EPI_ISL_4378613, EPI_ISL_4378643, EPI_ISL_4378709, EPI_ISL_4378726, EPI_ISL_4378762, EPI_ISL_4378779, EPI_ISL_4378793, EPI_ISL_4378882, EPI_ISL_4378907, EPI_ISL_4378952, EPI_ISL_4378964, EPI_ISL_4379001, EPI_ISL_4379130, EPI_ISL_4379176, EPI_ISL_4379207, EPI_ISL_4379242, EPI_ISL_4379269, EPI_ISL_4379381, EPI_ISL_4379387, EPI_ISL_4379605, EPI_ISL_4379614, EPI_ISL_4379704, EPI_ISL_4379716 | Adrian Paskey; Amanda Douglas; Amanda Suchanek; Andrea Throop; Ayla Burns; Ben L. Rambo-Martin; Benjamin Rambo-Martin; Bobbi Croy; Brian Krueger; Brian Norvell; Christopher Gulvick; Christos Petropoulos; Clinton Paden; Clinton R. Paden; Craig Lukasik; Dakota Howard; Darlene Wagner; Debbie Boles; Dhvani Batra; Duncan MacCannell; Eyad Almasri; Goran Stevoic; Howard Engler; Hrushikesh Deshmukh; Jake Humphrey; Jana Schroth; Jason Caravas; Joe Voshell; John Pruitt; Jonathan Meltzer; Jonathan Williams; Kara Moser; Kimberly Wagner; Kristine Lacey; Lax Iyer; Lisa Pfefferle; Lyndon Tilson; Manoj Jain; Marcia Eisenberg; Mary Ann Cristobal; Mary Cristobal; Mary Williamson; Matthew Robinson; Matthew Schmerer; Michael Levandoski; Mike Sapeta; Mindy Nye; Minoo Agarwal; Mohan Kolli; Nuthawin Charoensri; Oren Cohen; Peter Cook; Peter W. Cook; Prashant Gupta; Qian Zeng; Rama Ghatti; Scott Parker; Scott Ryan; Scott Sammons; Shatavia Morrison; Stanley Letovsky; Steven Ragan; Suresh Babu Selvaraju; Suresh Selvaraju; Susan Countryman; Susan Hicks; Suxiang Tong; Suzanne Dale; Thomas Urban; Tim Kuphal; Tricia Zwiefelhofer; Tymeckia Kendall; Victoria Caban Figueroa; Vincent Drouillon; Yvette Unourumhi |                                                                                                                                                                                                                    |                                                                                                                                                                                                                                                                                                                                    |
| see above                                                                                                                                                                                                                                                                                                                                                                                                                                                                                                                                                                                                                                                                                                                                                                                                                                                                                                                                                                                                                                                                                                                                                                                                                                                                                                                                                                                                                                                                                                                                                                                                                                                                                                                                                                                                                                                                                                                                                                                                                                                                                                                                                                                                                                                                                                                                                                                                                                                                                                                                                                                                                                                                                                                                                                                                                                                                                                                                                                                                                                                                                                                                                                                                                                                                                                                                                                                                                                                                           | Laboratory Corporation of America                                                                                                                                                                                                                                                                                                                                                                                                                                                                                                                                                                                                                                                                                                                                                                                                                                                                                                                                                                                                                                                                                                                                                                                                            | Centers for Disease Control and Prevention Division of Viral Diseases, Pathogen Discovery                                                                                                                          | Cheng-Hsun Chiu; Cheng-Ta Yang; Chi-Hsien Huang; Chung-Guei Huang; Guang-Wu Chen; Kuang-Tso Le; Kuo-Chien Tsao; Kuo-Ming Lee; Mei-Jen Hsiao; Peng-Nien Huang; Po-Wei Huang; Shin-Ru Shih; Shu-Li Yang; Shu-Min Lin; Yi-Chun Liu; Yu-Nong Gong                                                                                      |
| EPI_ISL_415741,<br>EPI_ISL_417519,<br>EPI_ISL_417520,<br>EPI_ISL_417523                                                                                                                                                                                                                                                                                                                                                                                                                                                                                                                                                                                                                                                                                                                                                                                                                                                                                                                                                                                                                                                                                                                                                                                                                                                                                                                                                                                                                                                                                                                                                                                                                                                                                                                                                                                                                                                                                                                                                                                                                                                                                                                                                                                                                                                                                                                                                                                                                                                                                                                                                                                                                                                                                                                                                                                                                                                                                                                                                                                                                                                                                                                                                                                                                                                                                                                                                                                                             | Laboratory Medicine                                                                                                                                                                                                                                                                                                                                                                                                                                                                                                                                                                                                                                                                                                                                                                                                                                                                                                                                                                                                                                                                                                                                                                                                                          | Department of Laboratory Medicine, Lin-Kou Chang Gung Memorial Hospital, Taoyuan, Taiwan                                                                                                                           | Anatoly Krasko; Artur Akhremchuk; Elena Gasich; Kirill Bulda; Leonid Valentovich; Vladimir Gorbunov                                                                                                                                                                                                                                |
| EPI_ISL_1138983                                                                                                                                                                                                                                                                                                                                                                                                                                                                                                                                                                                                                                                                                                                                                                                                                                                                                                                                                                                                                                                                                                                                                                                                                                                                                                                                                                                                                                                                                                                                                                                                                                                                                                                                                                                                                                                                                                                                                                                                                                                                                                                                                                                                                                                                                                                                                                                                                                                                                                                                                                                                                                                                                                                                                                                                                                                                                                                                                                                                                                                                                                                                                                                                                                                                                                                                                                                                                                                                     | Laboratory for HIV and opportunistic infections diagnosis The Republican Research and Practical Center for Epidemiology and Microbiology (RRPCEM)                                                                                                                                                                                                                                                                                                                                                                                                                                                                                                                                                                                                                                                                                                                                                                                                                                                                                                                                                                                                                                                                                            | Laboratory for HIV and opportunistic infections diagnosis The Republican Research and Practical Center for Epidemiology and Microbiology (RRPCEM)                                                                  |                                                                                                                                                                                                                                                                                                                                    |
| EPI_ISL_7233462                                                                                                                                                                                                                                                                                                                                                                                                                                                                                                                                                                                                                                                                                                                                                                                                                                                                                                                                                                                                                                                                                                                                                                                                                                                                                                                                                                                                                                                                                                                                                                                                                                                                                                                                                                                                                                                                                                                                                                                                                                                                                                                                                                                                                                                                                                                                                                                                                                                                                                                                                                                                                                                                                                                                                                                                                                                                                                                                                                                                                                                                                                                                                                                                                                                                                                                                                                                                                                                                     | Laboratory for Molecular Diagnostics,IPHMN                                                                                                                                                                                                                                                                                                                                                                                                                                                                                                                                                                                                                                                                                                                                                                                                                                                                                                                                                                                                                                                                                                                                                                                                   | Eurofins Genomics Europe Sequencing GmbH                                                                                                                                                                           | Danijela Vujošević                                                                                                                                                                                                                                                                                                                 |
| EPI_ISL_1381329                                                                                                                                                                                                                                                                                                                                                                                                                                                                                                                                                                                                                                                                                                                                                                                                                                                                                                                                                                                                                                                                                                                                                                                                                                                                                                                                                                                                                                                                                                                                                                                                                                                                                                                                                                                                                                                                                                                                                                                                                                                                                                                                                                                                                                                                                                                                                                                                                                                                                                                                                                                                                                                                                                                                                                                                                                                                                                                                                                                                                                                                                                                                                                                                                                                                                                                                                                                                                                                                     | Laboratory for Respiratory Viruses, Cantacuzino National Military-Medical Institute for Research and Development                                                                                                                                                                                                                                                                                                                                                                                                                                                                                                                                                                                                                                                                                                                                                                                                                                                                                                                                                                                                                                                                                                                             | Cantacuzino Institute Virology                                                                                                                                                                                     | Catalina Pascu; Luiza Ustea; Mihaela Lazar; Nicoleta Paraschiv; Sorin Dinu                                                                                                                                                                                                                                                         |
| EPI_ISL_435045                                                                                                                                                                                                                                                                                                                                                                                                                                                                                                                                                                                                                                                                                                                                                                                                                                                                                                                                                                                                                                                                                                                                                                                                                                                                                                                                                                                                                                                                                                                                                                                                                                                                                                                                                                                                                                                                                                                                                                                                                                                                                                                                                                                                                                                                                                                                                                                                                                                                                                                                                                                                                                                                                                                                                                                                                                                                                                                                                                                                                                                                                                                                                                                                                                                                                                                                                                                                                                                                      | Laboratory of Applied Genetics                                                                                                                                                                                                                                                                                                                                                                                                                                                                                                                                                                                                                                                                                                                                                                                                                                                                                                                                                                                                                                                                                                                                                                                                               | RSE "National Center for Biotechnology"                                                                                                                                                                            | Alexandr Shevtsov; Asylulan Amirgazin; Ilyas Akhmetolayev; Ruslan Kalendar; Viktoriya Lutsay; Yerlan Ramanculov                                                                                                                                                                                                                    |
| EPI_ISL_1138563                                                                                                                                                                                                                                                                                                                                                                                                                                                                                                                                                                                                                                                                                                                                                                                                                                                                                                                                                                                                                                                                                                                                                                                                                                                                                                                                                                                                                                                                                                                                                                                                                                                                                                                                                                                                                                                                                                                                                                                                                                                                                                                                                                                                                                                                                                                                                                                                                                                                                                                                                                                                                                                                                                                                                                                                                                                                                                                                                                                                                                                                                                                                                                                                                                                                                                                                                                                                                                                                     | Laboratory of Communicable Diseases                                                                                                                                                                                                                                                                                                                                                                                                                                                                                                                                                                                                                                                                                                                                                                                                                                                                                                                                                                                                                                                                                                                                                                                                          | 1. Laboratory of Communicable Diseases (Estonia); 2. Eurofins Genomics Europe Sequencing GmbH                                                                                                                      | Liidia Dotsenko                                                                                                                                                                                                                                                                                                                    |
| EPI_ISL_1201427                                                                                                                                                                                                                                                                                                                                                                                                                                                                                                                                                                                                                                                                                                                                                                                                                                                                                                                                                                                                                                                                                                                                                                                                                                                                                                                                                                                                                                                                                                                                                                                                                                                                                                                                                                                                                                                                                                                                                                                                                                                                                                                                                                                                                                                                                                                                                                                                                                                                                                                                                                                                                                                                                                                                                                                                                                                                                                                                                                                                                                                                                                                                                                                                                                                                                                                                                                                                                                                                     | Laboratory of Genetics and Personalized Medicine, Zan Mitrev Clinic                                                                                                                                                                                                                                                                                                                                                                                                                                                                                                                                                                                                                                                                                                                                                                                                                                                                                                                                                                                                                                                                                                                                                                          | Laboratory of Genetics and Personalized Medicine, Zan Mitrev Clinic                                                                                                                                                | Kungulovski G. et al.                                                                                                                                                                                                                                                                                                              |

|                                                                                                                                                                                                                                                                                                                                                                                                                                                                                                                                                                                                                                                                                                                                                                                                                                                                                                                                                                                                                                                                                                                                                                                                                                                                                                                                                                                                                                                                                                                                                                                                                                                                                                                                                                                                                                                                                                                                                                                                                                                                                                                                                                                                                                                                                                                                                                                                                                                                                                                                                                                                                                                                                                                                                                                                                                                                                                                                                                                                                                                                                                                                                                                                                                                                                                                                                                                                                                                                                                                                                                                                                                                                                                                                                                                                                                                                                                                                                                                                                                                                                                                                                                                                                                                                                                                                                                                                                                                                                                                                                                              |                                                                                                                                                                                                                                                   |                                                                                                                      |                                                                                                                                                                                                                                                                                                                                                                                                                                                                                                                                                                                                                                                                                                                                           |
|------------------------------------------------------------------------------------------------------------------------------------------------------------------------------------------------------------------------------------------------------------------------------------------------------------------------------------------------------------------------------------------------------------------------------------------------------------------------------------------------------------------------------------------------------------------------------------------------------------------------------------------------------------------------------------------------------------------------------------------------------------------------------------------------------------------------------------------------------------------------------------------------------------------------------------------------------------------------------------------------------------------------------------------------------------------------------------------------------------------------------------------------------------------------------------------------------------------------------------------------------------------------------------------------------------------------------------------------------------------------------------------------------------------------------------------------------------------------------------------------------------------------------------------------------------------------------------------------------------------------------------------------------------------------------------------------------------------------------------------------------------------------------------------------------------------------------------------------------------------------------------------------------------------------------------------------------------------------------------------------------------------------------------------------------------------------------------------------------------------------------------------------------------------------------------------------------------------------------------------------------------------------------------------------------------------------------------------------------------------------------------------------------------------------------------------------------------------------------------------------------------------------------------------------------------------------------------------------------------------------------------------------------------------------------------------------------------------------------------------------------------------------------------------------------------------------------------------------------------------------------------------------------------------------------------------------------------------------------------------------------------------------------------------------------------------------------------------------------------------------------------------------------------------------------------------------------------------------------------------------------------------------------------------------------------------------------------------------------------------------------------------------------------------------------------------------------------------------------------------------------------------------------------------------------------------------------------------------------------------------------------------------------------------------------------------------------------------------------------------------------------------------------------------------------------------------------------------------------------------------------------------------------------------------------------------------------------------------------------------------------------------------------------------------------------------------------------------------------------------------------------------------------------------------------------------------------------------------------------------------------------------------------------------------------------------------------------------------------------------------------------------------------------------------------------------------------------------------------------------------------------------------------------------------------------------------------|---------------------------------------------------------------------------------------------------------------------------------------------------------------------------------------------------------------------------------------------------|----------------------------------------------------------------------------------------------------------------------|-------------------------------------------------------------------------------------------------------------------------------------------------------------------------------------------------------------------------------------------------------------------------------------------------------------------------------------------------------------------------------------------------------------------------------------------------------------------------------------------------------------------------------------------------------------------------------------------------------------------------------------------------------------------------------------------------------------------------------------------|
| EPI_ISL_418263, EPI_ISL_418264                                                                                                                                                                                                                                                                                                                                                                                                                                                                                                                                                                                                                                                                                                                                                                                                                                                                                                                                                                                                                                                                                                                                                                                                                                                                                                                                                                                                                                                                                                                                                                                                                                                                                                                                                                                                                                                                                                                                                                                                                                                                                                                                                                                                                                                                                                                                                                                                                                                                                                                                                                                                                                                                                                                                                                                                                                                                                                                                                                                                                                                                                                                                                                                                                                                                                                                                                                                                                                                                                                                                                                                                                                                                                                                                                                                                                                                                                                                                                                                                                                                                                                                                                                                                                                                                                                                                                                                                                                                                                                                                               | Laboratory of Microbiology, Department of Medicine, National and Kapodistrian University of Athens, Greece                                                                                                                                        | Laboratory of Biology, Department of Medicine, Democritus University of Thrace, Greece                               | Elisavet Gatzidou; Ioannis Karakasilias; Maria Bampali; Nikolaos Dvrolis; Nikolaos Spanakis; Stavroula Veletza                                                                                                                                                                                                                                                                                                                                                                                                                                                                                                                                                                                                                            |
| EPI_ISL_417419                                                                                                                                                                                                                                                                                                                                                                                                                                                                                                                                                                                                                                                                                                                                                                                                                                                                                                                                                                                                                                                                                                                                                                                                                                                                                                                                                                                                                                                                                                                                                                                                                                                                                                                                                                                                                                                                                                                                                                                                                                                                                                                                                                                                                                                                                                                                                                                                                                                                                                                                                                                                                                                                                                                                                                                                                                                                                                                                                                                                                                                                                                                                                                                                                                                                                                                                                                                                                                                                                                                                                                                                                                                                                                                                                                                                                                                                                                                                                                                                                                                                                                                                                                                                                                                                                                                                                                                                                                                                                                                                                               | Laboratory of Molecular Virology International Center for Genetic Engineering and Biotechnology (ICGEB)                                                                                                                                           | ARGO Open Lab Platform for Genome sequencing                                                                         | D'Agaro P; Dal Monego S; Licastro D; Marcello A; Rajasekharan S; Segat L                                                                                                                                                                                                                                                                                                                                                                                                                                                                                                                                                                                                                                                                  |
| EPI_ISL_415660                                                                                                                                                                                                                                                                                                                                                                                                                                                                                                                                                                                                                                                                                                                                                                                                                                                                                                                                                                                                                                                                                                                                                                                                                                                                                                                                                                                                                                                                                                                                                                                                                                                                                                                                                                                                                                                                                                                                                                                                                                                                                                                                                                                                                                                                                                                                                                                                                                                                                                                                                                                                                                                                                                                                                                                                                                                                                                                                                                                                                                                                                                                                                                                                                                                                                                                                                                                                                                                                                                                                                                                                                                                                                                                                                                                                                                                                                                                                                                                                                                                                                                                                                                                                                                                                                                                                                                                                                                                                                                                                                               | Laboratory of Molecular Virology, Pontificia Universidad Católica de Chile                                                                                                                                                                        | MSHS Pathogen Surveillance Program                                                                                   | Ajay Obla; Ana Silvia Gonzalez-Reiche; Eileen Serrano; Hala Alshammary; Harm van Bakel; Juan Soto; Matthew Hernandez; Melissa Smith; Mitchell Sullivan; Pablo Vial; Rafael A. Medina; Robert Sebra; Shwetha SriDhar Hara; Tamara Garcia; Viviana Simon; Ying-Chih Wang; Zenab Khan                                                                                                                                                                                                                                                                                                                                                                                                                                                        |
| EPI_ISL_1181381, EPI_ISL_2196194, EPI_ISL_4237228, EPI_ISL_6173181                                                                                                                                                                                                                                                                                                                                                                                                                                                                                                                                                                                                                                                                                                                                                                                                                                                                                                                                                                                                                                                                                                                                                                                                                                                                                                                                                                                                                                                                                                                                                                                                                                                                                                                                                                                                                                                                                                                                                                                                                                                                                                                                                                                                                                                                                                                                                                                                                                                                                                                                                                                                                                                                                                                                                                                                                                                                                                                                                                                                                                                                                                                                                                                                                                                                                                                                                                                                                                                                                                                                                                                                                                                                                                                                                                                                                                                                                                                                                                                                                                                                                                                                                                                                                                                                                                                                                                                                                                                                                                           | Laboratory of Respiratory Viruses and Measles, Oswaldo Cruz Institute, FIOCRUZ                                                                                                                                                                    | Laboratory of Respiratory Viruses and Measles, Oswaldo Cruz Institute, FIOCRUZ                                       | Agatha Cristinne Prudencio; Alice Sampaio Rocha; Ana Carolina Mendonca; Anna Carolina Paixao; Bruna Mendonca da Silva; Elisa Cavalcante Pereira; Fernando Motta; Igor Arantes; Ighor Leonardo Arantes Gomes; Jéssica Graça Macedo de Carvalho; Larissa Machado Pinto; Luciana Appolinario; Marilda Siqueira on behalf of the Fiocruz COVID-19 Genomic Surveillance Network; Paola Resende; Renata Serrano Lopes; Taina Venas                                                                                                                                                                                                                                                                                                              |
| EPI_ISL_414045                                                                                                                                                                                                                                                                                                                                                                                                                                                                                                                                                                                                                                                                                                                                                                                                                                                                                                                                                                                                                                                                                                                                                                                                                                                                                                                                                                                                                                                                                                                                                                                                                                                                                                                                                                                                                                                                                                                                                                                                                                                                                                                                                                                                                                                                                                                                                                                                                                                                                                                                                                                                                                                                                                                                                                                                                                                                                                                                                                                                                                                                                                                                                                                                                                                                                                                                                                                                                                                                                                                                                                                                                                                                                                                                                                                                                                                                                                                                                                                                                                                                                                                                                                                                                                                                                                                                                                                                                                                                                                                                                               | Laboratório Central de Saúde Pública Noel Nutels (LACEN-RJ)                                                                                                                                                                                       | Laboratory of Respiratory Viruses and Measles, Oswaldo Cruz Institute, FIOCRUZ                                       | Aline Mattos; Allison Fabri; Braulia Caetano; Cristiana Garcia; Fernando Motta; Joilson Xavier; Jonathan Lopes; Luciano Appolinario; Maria Nóbrega; Maria Ogrzewalska; Marilda SiqueiraFiocruz COVID-19 Genomic Surveillance Network; Milene Miranda; Paola Resende; Sunando Roy                                                                                                                                                                                                                                                                                                                                                                                                                                                          |
| EPI_ISL_415105                                                                                                                                                                                                                                                                                                                                                                                                                                                                                                                                                                                                                                                                                                                                                                                                                                                                                                                                                                                                                                                                                                                                                                                                                                                                                                                                                                                                                                                                                                                                                                                                                                                                                                                                                                                                                                                                                                                                                                                                                                                                                                                                                                                                                                                                                                                                                                                                                                                                                                                                                                                                                                                                                                                                                                                                                                                                                                                                                                                                                                                                                                                                                                                                                                                                                                                                                                                                                                                                                                                                                                                                                                                                                                                                                                                                                                                                                                                                                                                                                                                                                                                                                                                                                                                                                                                                                                                                                                                                                                                                                               | Laboratório Central de Saúde Pública Professor Gonçalves Moniz (LACEN-BA)                                                                                                                                                                         | Laboratory of Respiratory Viruses and Measles, Oswaldo Cruz Institute, FIOCRUZ                                       | Aline Mattos; Allison Fabri; Braulia Caetano; Cristiana Garcia; Fernando Motta; Joilson Xavier; Jonathan Lopes; Luciano Appolinario; Maria Nóbrega; Maria Ogrzewalska; Marilda Siqueira Fiocruz COVID-19 Genomic Surveillance Network; Milene Miranda; Paola Resende; Sunando Roy                                                                                                                                                                                                                                                                                                                                                                                                                                                         |
| EPI_ISL_415128                                                                                                                                                                                                                                                                                                                                                                                                                                                                                                                                                                                                                                                                                                                                                                                                                                                                                                                                                                                                                                                                                                                                                                                                                                                                                                                                                                                                                                                                                                                                                                                                                                                                                                                                                                                                                                                                                                                                                                                                                                                                                                                                                                                                                                                                                                                                                                                                                                                                                                                                                                                                                                                                                                                                                                                                                                                                                                                                                                                                                                                                                                                                                                                                                                                                                                                                                                                                                                                                                                                                                                                                                                                                                                                                                                                                                                                                                                                                                                                                                                                                                                                                                                                                                                                                                                                                                                                                                                                                                                                                                               | Laboratório Central de Saúde Pública do Estado do Espírito Santo (LACEN-ES)                                                                                                                                                                       | Laboratory of Respiratory Viruses and Measles, Oswaldo Cruz Institute, FIOCRUZ                                       | Aline Mattos; Allison Fabri; Braulia Caetano; Cristiana Garcia; Fernando Motta; Joilson Xavier; Jonathan Lopes; Luciano Appolinario; Maria Nóbrega; Maria Ogrzewalska; Marilda Siqueira on behalf of the Fiocruz COVID-19 Genomic Surveillance Network; Milene Miranda; Paola Resende; Sunando Roy                                                                                                                                                                                                                                                                                                                                                                                                                                        |
| EPI_ISL_2790160, EPI_ISL_2790166                                                                                                                                                                                                                                                                                                                                                                                                                                                                                                                                                                                                                                                                                                                                                                                                                                                                                                                                                                                                                                                                                                                                                                                                                                                                                                                                                                                                                                                                                                                                                                                                                                                                                                                                                                                                                                                                                                                                                                                                                                                                                                                                                                                                                                                                                                                                                                                                                                                                                                                                                                                                                                                                                                                                                                                                                                                                                                                                                                                                                                                                                                                                                                                                                                                                                                                                                                                                                                                                                                                                                                                                                                                                                                                                                                                                                                                                                                                                                                                                                                                                                                                                                                                                                                                                                                                                                                                                                                                                                                                                             | Laboratório de Biotecnologia Aplicada (LBA) - Laboratório de Biologia Molecular - Hospital das Clínicas, Faculdade de Medicina de Botucatu, Departamento de Bioprocessos e Biotecnologia - Faculdade de Ciências Agronômicas, UNESP - Botucatu/SP | Laboratory of Respiratory Viruses and Measles, Oswaldo Cruz Institute, FIOCRUZ                                       | Alice Sampaio Rocha; Ana Carolina Mendonca; Anna Carolina Paixao; Elisa Cavalcante Pereira; Felipe Allan da Silva Costa; Fernando Motta; Jayme Augusto de Souza Neto; Leonardo Nazario de Moraes; Luciana Appolinario; Marilda Siqueira on behalf of the Fiocruz COVID-19 Genomic Surveillance Network; Paola Resende; Patricia Akemi Assato; Rejane Maria Tommasini; Renata Serrano Lopes; Taina Venas                                                                                                                                                                                                                                                                                                                                   |
| EPI_ISL_3190193, EPI_ISL_3190209, EPI_ISL_3190210, EPI_ISL_3190216                                                                                                                                                                                                                                                                                                                                                                                                                                                                                                                                                                                                                                                                                                                                                                                                                                                                                                                                                                                                                                                                                                                                                                                                                                                                                                                                                                                                                                                                                                                                                                                                                                                                                                                                                                                                                                                                                                                                                                                                                                                                                                                                                                                                                                                                                                                                                                                                                                                                                                                                                                                                                                                                                                                                                                                                                                                                                                                                                                                                                                                                                                                                                                                                                                                                                                                                                                                                                                                                                                                                                                                                                                                                                                                                                                                                                                                                                                                                                                                                                                                                                                                                                                                                                                                                                                                                                                                                                                                                                                           | Laboratório Central de Saude Publica do Estado do Rio de Janeiro (LACEN/RJ)                                                                                                                                                                       | Laboratory of Respiratory Viruses and Measles, Oswaldo Cruz Institute, FIOCRUZ                                       | Agatha Cristinne Prudencio Soares; Alice Sampaio Rocha; Ana Carolina Mendonca; Andrea Cony Calvacanti; Anna Carolina Paixao; Elisa Cavalcante Pereira; Fernando Motta; Ighor Leonardo Arantes Gomes; Luciana Appolinario; Marilda Siqueira on behalf of the Fiocruz COVID-19 Genomic Surveillance Network; Paola Resende; Renata Serrano Lopes; Taina Venas                                                                                                                                                                                                                                                                                                                                                                               |
| EPI_ISL_1515791                                                                                                                                                                                                                                                                                                                                                                                                                                                                                                                                                                                                                                                                                                                                                                                                                                                                                                                                                                                                                                                                                                                                                                                                                                                                                                                                                                                                                                                                                                                                                                                                                                                                                                                                                                                                                                                                                                                                                                                                                                                                                                                                                                                                                                                                                                                                                                                                                                                                                                                                                                                                                                                                                                                                                                                                                                                                                                                                                                                                                                                                                                                                                                                                                                                                                                                                                                                                                                                                                                                                                                                                                                                                                                                                                                                                                                                                                                                                                                                                                                                                                                                                                                                                                                                                                                                                                                                                                                                                                                                                                              | Lafene Health Center                                                                                                                                                                                                                              | Kansas State Veterinary Diagnostic Laboratory                                                                        | Andreae Lu; Elizabeth Porter; Emily Cox; Jamie Henningson; Jianfa Bai; Kasey Hogan; Lance Noll; Rachel Palinski; Tyler Doerkson                                                                                                                                                                                                                                                                                                                                                                                                                                                                                                                                                                                                           |
| EPI_ISL_2189398                                                                                                                                                                                                                                                                                                                                                                                                                                                                                                                                                                                                                                                                                                                                                                                                                                                                                                                                                                                                                                                                                                                                                                                                                                                                                                                                                                                                                                                                                                                                                                                                                                                                                                                                                                                                                                                                                                                                                                                                                                                                                                                                                                                                                                                                                                                                                                                                                                                                                                                                                                                                                                                                                                                                                                                                                                                                                                                                                                                                                                                                                                                                                                                                                                                                                                                                                                                                                                                                                                                                                                                                                                                                                                                                                                                                                                                                                                                                                                                                                                                                                                                                                                                                                                                                                                                                                                                                                                                                                                                                                              | Laguna Provincial Hospital - San Pablo District Hospital                                                                                                                                                                                          | Phillipine Genome Center                                                                                             | Alethea R. de Guzman; Ana Ong-Lim; Arienne A. Zamora; Asia Louisa U. Chong; Benedict A. Maralit; Candice Francheska B. Tamboan; Carlo M. Lapid; Celia Carlos; Devon Ray Pacial; Edsel Maurice Salvaña; El King D. Morado; Elcid Aaron R. Panglinan; Eva Maria Cutiungco de la Paz; Francis A. Tablizo; Irish Coleen A. Asin; Jaime C. Montoya; Jan Michael C. Yap; Jo-Hannah S. Llamas; John Q. Wong; Joshua Gargos A. Dizon; Juan Antonio R. Magalang; Karl Sophia Agape R. Padilla; Kenneth M. Kim; Kris P. Punayan; Marc Edsel C. Ayes; Maria Rosario Singh-Vergiere and Cynthia P. Saloma; Maria Sofia L. Yanzong; Marissa Alejandria; Razel Nikka M. Hao; Renato Jacinto Q. Mantaring; Rianna Patricia S. Cruz; Sheila Mae M. Araiza |
| EPI_ISL_3207576                                                                                                                                                                                                                                                                                                                                                                                                                                                                                                                                                                                                                                                                                                                                                                                                                                                                                                                                                                                                                                                                                                                                                                                                                                                                                                                                                                                                                                                                                                                                                                                                                                                                                                                                                                                                                                                                                                                                                                                                                                                                                                                                                                                                                                                                                                                                                                                                                                                                                                                                                                                                                                                                                                                                                                                                                                                                                                                                                                                                                                                                                                                                                                                                                                                                                                                                                                                                                                                                                                                                                                                                                                                                                                                                                                                                                                                                                                                                                                                                                                                                                                                                                                                                                                                                                                                                                                                                                                                                                                                                                              | Lancet lab                                                                                                                                                                                                                                        | NHLS/UCT                                                                                                             | Arash Iranzadeh; Bruna Galvao; Carolyn Williamson; Deelan Doolabh; Diana Hardie; Gert Marais; Innocent Mudau; Lynn Tyers; Marvin Hsiao; Rageema Joseph; Sisonke; Stephen Korsman                                                                                                                                                                                                                                                                                                                                                                                                                                                                                                                                                          |
| EPI_ISL_1361888, EPI_ISL_1940946, EPI_ISL_1941092                                                                                                                                                                                                                                                                                                                                                                                                                                                                                                                                                                                                                                                                                                                                                                                                                                                                                                                                                                                                                                                                                                                                                                                                                                                                                                                                                                                                                                                                                                                                                                                                                                                                                                                                                                                                                                                                                                                                                                                                                                                                                                                                                                                                                                                                                                                                                                                                                                                                                                                                                                                                                                                                                                                                                                                                                                                                                                                                                                                                                                                                                                                                                                                                                                                                                                                                                                                                                                                                                                                                                                                                                                                                                                                                                                                                                                                                                                                                                                                                                                                                                                                                                                                                                                                                                                                                                                                                                                                                                                                            | Landesamt für Verbraucherschutz Sachsen Anhalt, Magdeburg                                                                                                                                                                                         | Institute of Medical Microbiology and Hospital Hygiene                                                               | Ajloscha Tersteegen; Prof. Dr. Achim Kaasch                                                                                                                                                                                                                                                                                                                                                                                                                                                                                                                                                                                                                                                                                               |
| EPI_ISL_407079                                                                                                                                                                                                                                                                                                                                                                                                                                                                                                                                                                                                                                                                                                                                                                                                                                                                                                                                                                                                                                                                                                                                                                                                                                                                                                                                                                                                                                                                                                                                                                                                                                                                                                                                                                                                                                                                                                                                                                                                                                                                                                                                                                                                                                                                                                                                                                                                                                                                                                                                                                                                                                                                                                                                                                                                                                                                                                                                                                                                                                                                                                                                                                                                                                                                                                                                                                                                                                                                                                                                                                                                                                                                                                                                                                                                                                                                                                                                                                                                                                                                                                                                                                                                                                                                                                                                                                                                                                                                                                                                                               | Lapland Central Hospital                                                                                                                                                                                                                          | Department of Virology, University of Helsinki and Helsinki University Hospital, Helsinki, Finland                   | Hannimari Kallio-Kokko; Olli Vapalahti; Suvi Kuivanan; Teemu Smura                                                                                                                                                                                                                                                                                                                                                                                                                                                                                                                                                                                                                                                                        |
| EPI_ISL_3185054, EPI_ISL_3186596, EPI_ISL_3186598, EPI_ISL_3187089, EPI_ISL_3187226                                                                                                                                                                                                                                                                                                                                                                                                                                                                                                                                                                                                                                                                                                                                                                                                                                                                                                                                                                                                                                                                                                                                                                                                                                                                                                                                                                                                                                                                                                                                                                                                                                                                                                                                                                                                                                                                                                                                                                                                                                                                                                                                                                                                                                                                                                                                                                                                                                                                                                                                                                                                                                                                                                                                                                                                                                                                                                                                                                                                                                                                                                                                                                                                                                                                                                                                                                                                                                                                                                                                                                                                                                                                                                                                                                                                                                                                                                                                                                                                                                                                                                                                                                                                                                                                                                                                                                                                                                                                                          | Laverty Pathology                                                                                                                                                                                                                                 | NSW Health Pathology - Institute of Clinical Pathology and Medical Research; Westmead Hospital; University of Sydney | Arnott A.; CDM-PH et al.; Draper J.; Gall M.; Martinez E.; Rockett R.; Sintchenko V.; on behalf of ICPMR                                                                                                                                                                                                                                                                                                                                                                                                                                                                                                                                                                                                                                  |
| EPI_ISL_2443531, EPI_ISL_2863887                                                                                                                                                                                                                                                                                                                                                                                                                                                                                                                                                                                                                                                                                                                                                                                                                                                                                                                                                                                                                                                                                                                                                                                                                                                                                                                                                                                                                                                                                                                                                                                                                                                                                                                                                                                                                                                                                                                                                                                                                                                                                                                                                                                                                                                                                                                                                                                                                                                                                                                                                                                                                                                                                                                                                                                                                                                                                                                                                                                                                                                                                                                                                                                                                                                                                                                                                                                                                                                                                                                                                                                                                                                                                                                                                                                                                                                                                                                                                                                                                                                                                                                                                                                                                                                                                                                                                                                                                                                                                                                                             | Laboratorio Central de Saude Publica do Estado do Parana (LACEN/PR)                                                                                                                                                                               | Laboratory of Respiratory Viruses and Measles, Oswaldo Cruz Institute, FIOCRUZ                                       | Agatha Cristinne Prudencio Soares; Alice Sampaio Rocha; Ana Carolina Mendonca; Anna Carolina Paixao; Elisa Cavalcante Pereira; Fernando Motta; Ighor Leonardo Arantes Gomes; Irina Riediger; Luciana Appolinario; Marilda Siqueira on behalf of the Fiocruz COVID-19 Genomic Surveillance Network; Paola Resende; Renata Serrano Lopes; Taina Venas                                                                                                                                                                                                                                                                                                                                                                                       |
| EPI_ISL_539077                                                                                                                                                                                                                                                                                                                                                                                                                                                                                                                                                                                                                                                                                                                                                                                                                                                                                                                                                                                                                                                                                                                                                                                                                                                                                                                                                                                                                                                                                                                                                                                                                                                                                                                                                                                                                                                                                                                                                                                                                                                                                                                                                                                                                                                                                                                                                                                                                                                                                                                                                                                                                                                                                                                                                                                                                                                                                                                                                                                                                                                                                                                                                                                                                                                                                                                                                                                                                                                                                                                                                                                                                                                                                                                                                                                                                                                                                                                                                                                                                                                                                                                                                                                                                                                                                                                                                                                                                                                                                                                                                               | Leeds Teaching Hospitals NHS Trust and Public Health England, National Infection Service (Leeds laboratory)                                                                                                                                       | Wellcome Sanger Institute for the COVID-19 Genomics UK (COG-UK) consortium                                           | Antony Hale and Alex Alderton; Cordelia Langford; David K. Jackson; Dominic Kwiatkowski; Ewan Harrison; Hollie Carden; Ian Johnston; John Sillitoe on behalf of the Wellcome Sanger Institute COVID-19 Surveillance Team; Katherine L. Harper; Louissa Macfarlane-Smith; Roberto Amato; Sonia Goncalves                                                                                                                                                                                                                                                                                                                                                                                                                                   |
| EPI_ISL_2138842                                                                                                                                                                                                                                                                                                                                                                                                                                                                                                                                                                                                                                                                                                                                                                                                                                                                                                                                                                                                                                                                                                                                                                                                                                                                                                                                                                                                                                                                                                                                                                                                                                                                                                                                                                                                                                                                                                                                                                                                                                                                                                                                                                                                                                                                                                                                                                                                                                                                                                                                                                                                                                                                                                                                                                                                                                                                                                                                                                                                                                                                                                                                                                                                                                                                                                                                                                                                                                                                                                                                                                                                                                                                                                                                                                                                                                                                                                                                                                                                                                                                                                                                                                                                                                                                                                                                                                                                                                                                                                                                                              | Life Sciences Center, Vilnius University                                                                                                                                                                                                          | Institute of Biotechnology, Life Sciences Center, Vilnius University                                                 | Albertas Timinskas; Alma Gedvilaitė; Danguole Ziogiene; Emilija Vasiliunaite; Milda Norkiene                                                                                                                                                                                                                                                                                                                                                                                                                                                                                                                                                                                                                                              |
| EPI_ISL_645709, EPI_ISL_645794, EPI_ISL_646215, EPI_ISL_646727, EPI_ISL_675466, EPI_ISL_701725, EPI_ISL_703201, EPI_ISL_731008, EPI_ISL_736500, EPI_ISL_846273, EPI_ISL_846499, EPI_ISL_851700, EPI_ISL_851820, EPI_ISL_874133, EPI_ISL_874434, EPI_ISL_874888, EPI_ISL_877794, EPI_ISL_879137, EPI_ISL_880276, EPI_ISL_881561, EPI_ISL_881766, EPI_ISL_882057, EPI_ISL_909609, EPI_ISL_916005, EPI_ISL_916959, EPI_ISL_916962, EPI_ISL_917214, EPI_ISL_917589, EPI_ISL_917593, EPI_ISL_931965, EPI_ISL_932209, EPI_ISL_945704, EPI_ISL_946619, EPI_ISL_956560, EPI_ISL_956682, EPI_ISL_963066, EPI_ISL_969664, EPI_ISL_970307, EPI_ISL_970527, EPI_ISL_986935, EPI_ISL_990396, EPI_ISL_990653, EPI_ISL_990856, EPI_ISL_1012678, EPI_ISL_1018413, EPI_ISL_1042845, EPI_ISL_1043673, EPI_ISL_1072900, EPI_ISL_1083439, EPI_ISL_1099223, EPI_ISL_1189245, EPI_ISL_1189537, EPI_ISL_1206701, EPI_ISL_1206930, EPI_ISL_1206951, EPI_ISL_1207118, EPI_ISL_1244320, EPI_ISL_1255496, EPI_ISL_1257665, EPI_ISL_1256245, EPI_ISL_1262408, EPI_ISL_1331408, EPI_ISL_1331436, EPI_ISL_1342760, EPI_ISL_1342864, EPI_ISL_1374825, EPI_ISL_1375635, EPI_ISL_1409714, EPI_ISL_1409831, EPI_ISL_1410768, EPI_ISL_1410894, EPI_ISL_1412818, EPI_ISL_1414329, EPI_ISL_1414972, EPI_ISL_1414977, EPI_ISL_1415648, EPI_ISL_1449154, EPI_ISL_1449293, EPI_ISL_1449415, EPI_ISL_1450470, EPI_ISL_1451680, EPI_ISL_1452994, EPI_ISL_1453911, EPI_ISL_1454031, EPI_ISL_1454045, EPI_ISL_1454423, EPI_ISL_1454696, EPI_ISL_1454749, EPI_ISL_1454803, EPI_ISL_1455224, EPI_ISL_1466182, EPI_ISL_1466393, EPI_ISL_1466445, EPI_ISL_1467278, EPI_ISL_1484608, EPI_ISL_1484864, EPI_ISL_1485040, EPI_ISL_1486917, EPI_ISL_1488715, EPI_ISL_1488719, EPI_ISL_1488735, EPI_ISL_1488751, EPI_ISL_1517802, EPI_ISL_1518679, EPI_ISL_1518899, EPI_ISL_1519344, EPI_ISL_1519555, EPI_ISL_1535302, EPI_ISL_1535310, EPI_ISL_1535900, EPI_ISL_1564501, EPI_ISL_1564520, EPI_ISL_1594886, EPI_ISL_1630928, EPI_ISL_1631330, EPI_ISL_1639874, EPI_ISL_1639927, EPI_ISL_1699341, EPI_ISL_1718370, EPI_ISL_1718479, EPI_ISL_1718757, EPI_ISL_1740571, EPI_ISL_1741134, EPI_ISL_17920506, EPI_ISL_1829874, EPI_ISL_1830591, EPI_ISL_1830883, EPI_ISL_1857860, EPI_ISL_1912381, EPI_ISL_1986168, EPI_ISL_1986661, EPI_ISL_2022227, EPI_ISL_2091632, EPI_ISL_2091804, EPI_ISL_2091810, EPI_ISL_2118645, EPI_ISL_2199671, EPI_ISL_3202249, EPI_ISL_3202269, EPI_ISL_3202745, EPI_ISL_3202789, EPI_ISL_3202990, EPI_ISL_3203018, EPI_ISL_3222334, EPI_ISL_3222465, EPI_ISL_3222472, EPI_ISL_3223073, EPI_ISL_3223226, EPI_ISL_3223714, EPI_ISL_3223731, EPI_ISL_3223765, EPI_ISL_3223919, EPI_ISL_3224150, EPI_ISL_3224512, EPI_ISL_3225391, EPI_ISL_3226139, EPI_ISL_3226608, EPI_ISL_3226618, EPI_ISL_3226644, EPI_ISL_3226862, EPI_ISL_3227060, EPI_ISL_3227087, EPI_ISL_3227661, EPI_ISL_3227767, EPI_ISL_3227806, EPI_ISL_3227822, EPI_ISL_3228056, EPI_ISL_3248072, EPI_ISL_3248205, EPI_ISL_3248282, EPI_ISL_3248364, EPI_ISL_3248539, EPI_ISL_3248857, EPI_ISL_3248904, EPI_ISL_3248916, EPI_ISL_3249261, EPI_ISL_3249267, EPI_ISL_3249360, EPI_ISL_3249464, EPI_ISL_3249489, EPI_ISL_3249605, EPI_ISL_3250343, EPI_ISL_3250520, EPI_ISL_3250529, EPI_ISL_3282217, EPI_ISL_3282317, EPI_ISL_3282338, EPI_ISL_3282745, EPI_ISL_3282849, EPI_ISL_3282863, EPI_ISL_3282874, EPI_ISL_3282957, EPI_ISL_3282995, EPI_ISL_3283276, EPI_ISL_3283393, EPI_ISL_3283403, EPI_ISL_3283445, EPI_ISL_3283542, EPI_ISL_3284585, EPI_ISL_3284680, EPI_ISL_3284718, EPI_ISL_3284873, EPI_ISL_3284915, EPI_ISL_3285015, EPI_ISL_3285136, EPI_ISL_3285176, EPI_ISL_3285211, EPI_ISL_3285262, EPI_ISL_3285359, EPI_ISL_3285961, EPI_ISL_3286000, EPI_ISL_3286114, EPI_ISL_3286210, EPI_ISL_3286384, EPI_ISL_3286617, EPI_ISL_3286673, EPI_ISL_3286688                                                                                                                                                                                                                                                                                                                                                                                                                                                                                                                                                                                                                                                                                                                                                                                |                                                                                                                                                                                                                                                   |                                                                                                                      |                                                                                                                                                                                                                                                                                                                                                                                                                                                                                                                                                                                                                                                                                                                                           |
| see above                                                                                                                                                                                                                                                                                                                                                                                                                                                                                                                                                                                                                                                                                                                                                                                                                                                                                                                                                                                                                                                                                                                                                                                                                                                                                                                                                                                                                                                                                                                                                                                                                                                                                                                                                                                                                                                                                                                                                                                                                                                                                                                                                                                                                                                                                                                                                                                                                                                                                                                                                                                                                                                                                                                                                                                                                                                                                                                                                                                                                                                                                                                                                                                                                                                                                                                                                                                                                                                                                                                                                                                                                                                                                                                                                                                                                                                                                                                                                                                                                                                                                                                                                                                                                                                                                                                                                                                                                                                                                                                                                                    | Lighthouse Lab in Alderley Park                                                                                                                                                                                                                   | Wellcome Sanger Institute for the COVID-19 Genomics UK (COG-UK) Consortium                                           | Cordelia Langford; David K. Jackson; Dominic Kwiatkowski; Ewan Harrison; Ian Johnston; Jacquelyn Wynn; Jeffrey Barrett; John Sillitoe on behalf of the Wellcome Sanger Institute COVID-19 Surveillance Team; John Sillitoe on behalf of the Wellcome Sanger Institute COVID-19 Surveillance Team ( <a href="http://www.sanger.ac.uk/covid-team">http://www.sanger.ac.uk/covid-team</a> ); Mairead Hyland; Roberto Amato; Sonia Goncalves; The Lighthouse Lab in Alderley Park and Alex Alderton                                                                                                                                                                                                                                           |
| EPI_ISL_551537, EPI_ISL_553394, EPI_ISL_553582, EPI_ISL_554624, EPI_ISL_555482, EPI_ISL_556072, EPI_ISL_557819, EPI_ISL_558753, EPI_ISL_567986, EPI_ISL_575628, EPI_ISL_589436, EPI_ISL_605949, EPI_ISL_621561, EPI_ISL_630897                                                                                                                                                                                                                                                                                                                                                                                                                                                                                                                                                                                                                                                                                                                                                                                                                                                                                                                                                                                                                                                                                                                                                                                                                                                                                                                                                                                                                                                                                                                                                                                                                                                                                                                                                                                                                                                                                                                                                                                                                                                                                                                                                                                                                                                                                                                                                                                                                                                                                                                                                                                                                                                                                                                                                                                                                                                                                                                                                                                                                                                                                                                                                                                                                                                                                                                                                                                                                                                                                                                                                                                                                                                                                                                                                                                                                                                                                                                                                                                                                                                                                                                                                                                                                                                                                                                                               | see above                                                                                                                                                                                                                                         | Wellcome Sanger Institute for the COVID-19 Genomics UK (COG-UK) consortium                                           | Cordelia Langford; David K. Jackson; Dominic Kwiatkowski; Ewan Harrison; Ian Johnston; Jacquelyn Wynn; John Sillitoe on behalf of the Wellcome Sanger Institute COVID-19 Surveillance Team ( <a href="http://www.sanger.ac.uk/covid-team">http://www.sanger.ac.uk/covid-team</a> ); Mairead Hyland; Roberto Amato; Sonia Goncalves; The Lighthouse Lab in Alderley Park and Alex Alderton                                                                                                                                                                                                                                                                                                                                                 |
| EPI_ISL_643664, EPI_ISL_643774, EPI_ISL_643839, EPI_ISL_658104, EPI_ISL_668219, EPI_ISL_718427, EPI_ISL_719262, EPI_ISL_777889, EPI_ISL_778143, EPI_ISL_781520, EPI_ISL_781691, EPI_ISL_797648, EPI_ISL_798258, EPI_ISL_800573, EPI_ISL_821753, EPI_ISL_879472, EPI_ISL_891422, EPI_ISL_948147, EPI_ISL_948177, EPI_ISL_986479, EPI_ISL_987651, EPI_ISL_987953, EPI_ISL_1033267, EPI_ISL_1206045, EPI_ISL_1206169, EPI_ISL_1242055, EPI_ISL_1242060, EPI_ISL_1242080, EPI_ISL_1242082, EPI_ISL_1242106, EPI_ISL_1242107, EPI_ISL_1242108, EPI_ISL_1256441, EPI_ISL_1256791, EPI_ISL_1257537, EPI_ISL_1257465, EPI_ISL_1257480, EPI_ISL_1257518, EPI_ISL_1257652, EPI_ISL_1264459, EPI_ISL_1273875, EPI_ISL_1275267, EPI_ISL_1275431, EPI_ISL_1277436, EPI_ISL_1277451, EPI_ISL_1277836, EPI_ISL_1294118, EPI_ISL_1294591, EPI_ISL_1294671, EPI_ISL_1294755, EPI_ISL_1294874, EPI_ISL_1315654, EPI_ISL_1325303, EPI_ISL_1325786, EPI_ISL_1325811, EPI_ISL_1326213, EPI_ISL_1326687, EPI_ISL_1328179, EPI_ISL_1329602, EPI_ISL_1330105, EPI_ISL_1331469, EPI_ISL_1331657, EPI_ISL_1331725, EPI_ISL_1332099, EPI_ISL_1332367, EPI_ISL_1333260, EPI_ISL_1333700, EPI_ISL_1342091, EPI_ISL_1342145, EPI_ISL_1342150, EPI_ISL_1342172, EPI_ISL_1342357, EPI_ISL_1343930, EPI_ISL_1345237, EPI_ISL_1345283, EPI_ISL_1345348, EPI_ISL_1345665, EPI_ISL_1346226, EPI_ISL_1375844, EPI_ISL_1375893, EPI_ISL_1376079, EPI_ISL_1376130, EPI_ISL_1378119, EPI_ISL_1378469, EPI_ISL_1408992, EPI_ISL_1409266, EPI_ISL_1410485, EPI_ISL_1410814, EPI_ISL_1413762, EPI_ISL_1449353, EPI_ISL_1451919, EPI_ISL_1452683, EPI_ISL_1453078, EPI_ISL_1454880, EPI_ISL_1454935, EPI_ISL_1455078, EPI_ISL_1455088, EPI_ISL_1455093, EPI_ISL_1456943, EPI_ISL_1472714, EPI_ISL_1472847, EPI_ISL_1473053, EPI_ISL_1483835, EPI_ISL_1505172, EPI_ISL_1506650, EPI_ISL_1506683, EPI_ISL_1507059, EPI_ISL_1507934, EPI_ISL_1508431, EPI_ISL_1508586, EPI_ISL_1517611, EPI_ISL_1519514, EPI_ISL_1537639, EPI_ISL_1544324, EPI_ISL_1544986, EPI_ISL_1564888, EPI_ISL_1565255, EPI_ISL_1565326, EPI_ISL_1564311, EPI_ISL_1564771, EPI_ISL_1564856, EPI_ISL_1564972, EPI_ISL_1594771, EPI_ISL_1594805, EPI_ISL_1595104, EPI_ISL_1595179, EPI_ISL_1595469, EPI_ISL_1616238, EPI_ISL_1630327, EPI_ISL_1631317, EPI_ISL_1631318, EPI_ISL_1634426, EPI_ISL_1634428, EPI_ISL_1634978, EPI_ISL_1635057, EPI_ISL_1635281, EPI_ISL_1653017, EPI_ISL_1653226, EPI_ISL_1653528, EPI_ISL_1673006, EPI_ISL_1673111, EPI_ISL_1698207, EPI_ISL_1698635, EPI_ISL_1699309, EPI_ISL_1699318, EPI_ISL_1741393, EPI_ISL_1741521, EPI_ISL_1741540, EPI_ISL_1741833, EPI_ISL_1741874, EPI_ISL_1742089, EPI_ISL_1742202, EPI_ISL_1758707, EPI_ISL_1758779, EPI_ISL_1759047, EPI_ISL_1759309, EPI_ISL_1759991, EPI_ISL_1790306, EPI_ISL_1790994, EPI_ISL_1830285, EPI_ISL_1830824, EPI_ISL_1939742, EPI_ISL_1980704, EPI_ISL_2120816, EPI_ISL_2152935, EPI_ISL_2199940, EPI_ISL_3201601, EPI_ISL_3201624, EPI_ISL_3201728, EPI_ISL_3201742, EPI_ISL_3201749, EPI_ISL_3203194, EPI_ISL_3203366, EPI_ISL_3203385, EPI_ISL_3203386, EPI_ISL_3203408, EPI_ISL_3203435, EPI_ISL_3203661, EPI_ISL_3203776, EPI_ISL_3203818, EPI_ISL_3203822, EPI_ISL_3203972, EPI_ISL_3204071, EPI_ISL_3204090, EPI_ISL_3221723, EPI_ISL_3221748, EPI_ISL_3221857, EPI_ISL_3221870, EPI_ISL_3221923, EPI_ISL_3221966, EPI_ISL_3222510, EPI_ISL_3222358, EPI_ISL_3223088, EPI_ISL_3223513, EPI_ISL_3223762, EPI_ISL_3223776, EPI_ISL_3223811, EPI_ISL_3223850, EPI_ISL_3224198, EPI_ISL_3224373, EPI_ISL_3224479, EPI_ISL_3224514, EPI_ISL_3224670, EPI_ISL_3224879, EPI_ISL_3224951, EPI_ISL_3224972, EPI_ISL_3224984, EPI_ISL_3225076, EPI_ISL_3225098, EPI_ISL_3226230, EPI_ISL_3226808, EPI_ISL_3226864, EPI_ISL_3226924, EPI_ISL_3226924, EPI_ISL_3226981, EPI_ISL_3227057, EPI_ISL_3227210, EPI_ISL_3228194, EPI_ISL_3228224, EPI_ISL_3247798, EPI_ISL_3248030, EPI_ISL_3248834, EPI_ISL_3248847, EPI_ISL_3248542, EPI_ISL_3248551, EPI_ISL_3248834, EPI_ISL_3249228, EPI_ISL_3249554, EPI_ISL_3250276, EPI_ISL_3250298, EPI_ISL_3250342, EPI_ISL_3250640, EPI_ISL_3250642, EPI_ISL_3281709, EPI_ISL_3281806, EPI_ISL_3281856, EPI_ISL_3282055, EPI_ISL_3282435, EPI_ISL_3282628, EPI_ISL_3282755, EPI_ISL_3282901, EPI_ISL_3283631, EPI_ISL_3284397, EPI_ISL_3284498, EPI_ISL_3284631, EPI_ISL_3285317, EPI_ISL_3285400, EPI_ISL_3285590, EPI_ISL_3285632, EPI_ISL_3285755, EPI_ISL_3285831, EPI_ISL_3286928, EPI_ISL_3286946, EPI_ISL_3286990, EPI_ISL_3287192, EPI_ISL_3287198, EPI_ISL_3287288, EPI_ISL_3287383, EPI_ISL_3287469, EPI_ISL_3287558 |                                                                                                                                                                                                                                                   |                                                                                                                      |                                                                                                                                                                                                                                                                                                                                                                                                                                                                                                                                                                                                                                                                                                                                           |
| see above                                                                                                                                                                                                                                                                                                                                                                                                                                                                                                                                                                                                                                                                                                                                                                                                                                                                                                                                                                                                                                                                                                                                                                                                                                                                                                                                                                                                                                                                                                                                                                                                                                                                                                                                                                                                                                                                                                                                                                                                                                                                                                                                                                                                                                                                                                                                                                                                                                                                                                                                                                                                                                                                                                                                                                                                                                                                                                                                                                                                                                                                                                                                                                                                                                                                                                                                                                                                                                                                                                                                                                                                                                                                                                                                                                                                                                                                                                                                                                                                                                                                                                                                                                                                                                                                                                                                                                                                                                                                                                                                                                    | Lighthouse Lab in Glasgow                                                                                                                                                                                                                         | Wellcome Sanger Institute for the COVID-19 Genomics UK                                                               | Anna Dominiczak and Alex Alderton; Carol Clugston; Cordelia Langford; David Gray; David K. Jackson; Dominic Kwiatkowski; Ewan Harrison; Harper VanSteenhouse; Ian Johnston; Jeffrey Barrett; John Sillitoe on behalf of the Wellcome Sanger Institute COVID-19 Surveillance Team; John Sillitoe on behalf of the Wellcome Sanger Institute COVID-19 Surveillance Team ( <a href="http://www.sanger.ac.uk/covid-team">http://www.sanger.ac.uk/covid-team</a> ); Roberto Amato; Sonia Goncalves; Yumi Kasai                                                                                                                                                                                                                                 |

| (COG-UK) Consortium                                                                                                                                                                                                                                                                                                                                                                                                                                                                                                                                                                                                                                                                                                                                                                                                                                                                                                                                                                                                                                                                                                                                                                                                                                                                                                                                                                                                                                                                                                                                                                                                                                                                                                                                                                                                                                                                                                                                                                                                                                                                                                                                                                                                                                                                                                                                                                                                                                                                                                                                                                                                                                                                                                                                                                                                                                                                                                                                                                                                                                                                                                                                                                                                                                                                                                   |                                                                                                                                                                                                                      |                                                                                                                                                                                                                                                                                                                    |                                                                                                                                                                                                                                                                                                                                                                                                                                                                                                                                                                                                                                                                                                                                                                                                                                                                                                                                                                                                                                                                                                                                                                                                                                                                                                                                                                                                                                                                                                                                                                                                                                                                                                                                                                                                                                                                                                                                                                                                                                                                                                                                                                                            |
|-----------------------------------------------------------------------------------------------------------------------------------------------------------------------------------------------------------------------------------------------------------------------------------------------------------------------------------------------------------------------------------------------------------------------------------------------------------------------------------------------------------------------------------------------------------------------------------------------------------------------------------------------------------------------------------------------------------------------------------------------------------------------------------------------------------------------------------------------------------------------------------------------------------------------------------------------------------------------------------------------------------------------------------------------------------------------------------------------------------------------------------------------------------------------------------------------------------------------------------------------------------------------------------------------------------------------------------------------------------------------------------------------------------------------------------------------------------------------------------------------------------------------------------------------------------------------------------------------------------------------------------------------------------------------------------------------------------------------------------------------------------------------------------------------------------------------------------------------------------------------------------------------------------------------------------------------------------------------------------------------------------------------------------------------------------------------------------------------------------------------------------------------------------------------------------------------------------------------------------------------------------------------------------------------------------------------------------------------------------------------------------------------------------------------------------------------------------------------------------------------------------------------------------------------------------------------------------------------------------------------------------------------------------------------------------------------------------------------------------------------------------------------------------------------------------------------------------------------------------------------------------------------------------------------------------------------------------------------------------------------------------------------------------------------------------------------------------------------------------------------------------------------------------------------------------------------------------------------------------------------------------------------------------------------------------------------|----------------------------------------------------------------------------------------------------------------------------------------------------------------------------------------------------------------------|--------------------------------------------------------------------------------------------------------------------------------------------------------------------------------------------------------------------------------------------------------------------------------------------------------------------|--------------------------------------------------------------------------------------------------------------------------------------------------------------------------------------------------------------------------------------------------------------------------------------------------------------------------------------------------------------------------------------------------------------------------------------------------------------------------------------------------------------------------------------------------------------------------------------------------------------------------------------------------------------------------------------------------------------------------------------------------------------------------------------------------------------------------------------------------------------------------------------------------------------------------------------------------------------------------------------------------------------------------------------------------------------------------------------------------------------------------------------------------------------------------------------------------------------------------------------------------------------------------------------------------------------------------------------------------------------------------------------------------------------------------------------------------------------------------------------------------------------------------------------------------------------------------------------------------------------------------------------------------------------------------------------------------------------------------------------------------------------------------------------------------------------------------------------------------------------------------------------------------------------------------------------------------------------------------------------------------------------------------------------------------------------------------------------------------------------------------------------------------------------------------------------------|
| EPI_ISL_530970, EPI_ISL_532619, EPI_ISL_532740, EPI_ISL_533023, EPI_ISL_533176, EPI_ISL_533196, EPI_ISL_540224, EPI_ISL_549780, EPI_ISL_567066, EPI_ISL_587673, EPI_ISL_590407, EPI_ISL_598861, EPI_ISL_600829, EPI_ISL_601246, EPI_ISL_601319, EPI_ISL_624019, EPI_ISL_629915, EPI_ISL_633602                                                                                                                                                                                                                                                                                                                                                                                                                                                                                                                                                                                                                                                                                                                                                                                                                                                                                                                                                                                                                                                                                                                                                                                                                                                                                                                                                                                                                                                                                                                                                                                                                                                                                                                                                                                                                                                                                                                                                                                                                                                                                                                                                                                                                                                                                                                                                                                                                                                                                                                                                                                                                                                                                                                                                                                                                                                                                                                                                                                                                        |                                                                                                                                                                                                                      |                                                                                                                                                                                                                                                                                                                    |                                                                                                                                                                                                                                                                                                                                                                                                                                                                                                                                                                                                                                                                                                                                                                                                                                                                                                                                                                                                                                                                                                                                                                                                                                                                                                                                                                                                                                                                                                                                                                                                                                                                                                                                                                                                                                                                                                                                                                                                                                                                                                                                                                                            |
| see above                                                                                                                                                                                                                                                                                                                                                                                                                                                                                                                                                                                                                                                                                                                                                                                                                                                                                                                                                                                                                                                                                                                                                                                                                                                                                                                                                                                                                                                                                                                                                                                                                                                                                                                                                                                                                                                                                                                                                                                                                                                                                                                                                                                                                                                                                                                                                                                                                                                                                                                                                                                                                                                                                                                                                                                                                                                                                                                                                                                                                                                                                                                                                                                                                                                                                                             | Lighthouse Lab in Glasgow                                                                                                                                                                                            | Wellcome Sanger Institute for the COVID-19 Genomics UK (COG-UK) consortium                                                                                                                                                                                                                                         | Anna Dominiczak and Alex Alderton; Carol Clugston; Cordelia Langford; David Gray; David K. Jackson; Dominic Kwiatkowski; Ewan Harrison; Harper VanSteenhouse; Ian Johnston; John Sillitoe; John Sillitoe on behalf of the Wellcome Sanger Institute COVID-19 Surveillance Team; John Sillitoe on behalf of the Wellcome Sanger Institute COVID-19 Surveillance Team ( <a href="http://www.sanger.ac.uk/covid-team">http://www.sanger.ac.uk/covid-team</a> ); Roberto Amato; Sonia Goncalves; Yumi Kasai                                                                                                                                                                                                                                                                                                                                                                                                                                                                                                                                                                                                                                                                                                                                                                                                                                                                                                                                                                                                                                                                                                                                                                                                                                                                                                                                                                                                                                                                                                                                                                                                                                                                                    |
| EPI_ISL_642879, EPI_ISL_674371, EPI_ISL_675950, EPI_ISL_708848, EPI_ISL_720070, EPI_ISL_720408, EPI_ISL_761504, EPI_ISL_769336, EPI_ISL_781415, EPI_ISL_781427, EPI_ISL_783158, EPI_ISL_797355, EPI_ISL_799479, EPI_ISL_799886, EPI_ISL_909222, EPI_ISL_932699, EPI_ISL_933063, EPI_ISL_939120, EPI_ISL_947286, EPI_ISL_958112, EPI_ISL_986080, EPI_ISL_988675, EPI_ISL_1007024, EPI_ISL_1082561, EPI_ISL_1098923, EPI_ISL_1189141, EPI_ISL_1206781, EPI_ISL_1207009, EPI_ISL_1207372, EPI_ISL_1245733, EPI_ISL_1257274, EPI_ISL_1325019, EPI_ISL_1325636, EPI_ISL_1326054, EPI_ISL_1327928, EPI_ISL_1329521, EPI_ISL_1329555, EPI_ISL_1329604, EPI_ISL_1330531, EPI_ISL_1330877, EPI_ISL_1331034, EPI_ISL_1334241, EPI_ISL_1342997, EPI_ISL_1343668, EPI_ISL_1344081, EPI_ISL_1344418, EPI_ISL_1375201, EPI_ISL_1409335, EPI_ISL_1451003, EPI_ISL_1451033, EPI_ISL_1451074, EPI_ISL_1452907, EPI_ISL_1467378, EPI_ISL_1467510, EPI_ISL_1467716, EPI_ISL_1484823, EPI_ISL_1504380, EPI_ISL_1535304, EPI_ISL_1535469, EPI_ISL_1548272, EPI_ISL_1615782, EPI_ISL_1615804, EPI_ISL_1616141, EPI_ISL_1616164, EPI_ISL_1631735, EPI_ISL_1631887, EPI_ISL_1698162, EPI_ISL_1698222, EPI_ISL_1699627, EPI_ISL_1699821, EPI_ISL_1719077, EPI_ISL_1719093, EPI_ISL_1719110, EPI_ISL_1741450, EPI_ISL_1790417, EPI_ISL_1790648, EPI_ISL_1790688, EPI_ISL_1790883, EPI_ISL_1806245, EPI_ISL_1830727, EPI_ISL_1985875, EPI_ISL_1987332, EPI_ISL_2021453, EPI_ISL_2091899, EPI_ISL_2120337, EPI_ISL_2153042, EPI_ISL_2198474, EPI_ISL_3200956, EPI_ISL_3200963, EPI_ISL_3201179, EPI_ISL_3201331, EPI_ISL_3201417, EPI_ISL_3201420, EPI_ISL_3201919, EPI_ISL_3202093, EPI_ISL_3202801, EPI_ISL_3202808, EPI_ISL_3203111, EPI_ISL_3203270, EPI_ISL_3203477, EPI_ISL_3221384, EPI_ISL_3221545, EPI_ISL_3221570, EPI_ISL_3221621, EPI_ISL_3221741, EPI_ISL_3221743, EPI_ISL_3221834, EPI_ISL_3222059, EPI_ISL_3222344, EPI_ISL_3222344, EPI_ISL_3222697, EPI_ISL_3222778, EPI_ISL_3222965, EPI_ISL_3223291, EPI_ISL_3223411, EPI_ISL_3223595, EPI_ISL_3223716, EPI_ISL_3223909, EPI_ISL_3224487, EPI_ISL_3224612, EPI_ISL_3225726, EPI_ISL_3225755, EPI_ISL_3225920, EPI_ISL_3226307, EPI_ISL_3226351, EPI_ISL_3227289, EPI_ISL_3227375, EPI_ISL_3248961, EPI_ISL_3249074, EPI_ISL_3249208, EPI_ISL_3249218, EPI_ISL_3249302, EPI_ISL_3249651, EPI_ISL_3249816, EPI_ISL_3250589, EPI_ISL_3250601, EPI_ISL_3250740, EPI_ISL_3250787, EPI_ISL_3250804, EPI_ISL_3250890, EPI_ISL_3250935, EPI_ISL_3250956, EPI_ISL_3251025, EPI_ISL_3251075, EPI_ISL_3251100, EPI_ISL_3251109, EPI_ISL_3251140, EPI_ISL_3251147, EPI_ISL_3251184, EPI_ISL_3251187, EPI_ISL_3251190, EPI_ISL_3251206, EPI_ISL_3251210, EPI_ISL_3251211, EPI_ISL_3251233, EPI_ISL_3281670, EPI_ISL_3281730, EPI_ISL_3281778, EPI_ISL_3283343, EPI_ISL_3283377, EPI_ISL_3283434, EPI_ISL_3283520, EPI_ISL_3283563, EPI_ISL_3284762, EPI_ISL_3284838, EPI_ISL_3284966, EPI_ISL_3285026, EPI_ISL_3285074, EPI_ISL_3285172, EPI_ISL_3285480, EPI_ISL_3285643, EPI_ISL_3285687, EPI_ISL_3285806, EPI_ISL_3285845, EPI_ISL_3286046, EPI_ISL_3286154, EPI_ISL_3286525, EPI_ISL_3286639, EPI_ISL_3286666, EPI_ISL_3286756, EPI_ISL_3286769, EPI_ISL_3286829, EPI_ISL_3286910, EPI_ISL_3286924, EPI_ISL_3286932, EPI_ISL_3286958, EPI_ISL_3287074, EPI_ISL_3287092, EPI_ISL_3287634 |                                                                                                                                                                                                                      |                                                                                                                                                                                                                                                                                                                    |                                                                                                                                                                                                                                                                                                                                                                                                                                                                                                                                                                                                                                                                                                                                                                                                                                                                                                                                                                                                                                                                                                                                                                                                                                                                                                                                                                                                                                                                                                                                                                                                                                                                                                                                                                                                                                                                                                                                                                                                                                                                                                                                                                                            |
| see above                                                                                                                                                                                                                                                                                                                                                                                                                                                                                                                                                                                                                                                                                                                                                                                                                                                                                                                                                                                                                                                                                                                                                                                                                                                                                                                                                                                                                                                                                                                                                                                                                                                                                                                                                                                                                                                                                                                                                                                                                                                                                                                                                                                                                                                                                                                                                                                                                                                                                                                                                                                                                                                                                                                                                                                                                                                                                                                                                                                                                                                                                                                                                                                                                                                                                                             | Lighthouse Lab in Milton Keynes                                                                                                                                                                                      | Wellcome Sanger Institute for the COVID-19 Genomics UK (COG-UK) Consortium                                                                                                                                                                                                                                         | Cordelia Langford; David K. Jackson; Dominic Kwiatkowski; Ewan Harrison; Ian Johnston; Jeffrey Barrett; John Sillitoe on behalf of the Wellcome Sanger Institute COVID-19 Surveillance Team; John Sillitoe on behalf of the Wellcome Sanger Institute COVID-19 Surveillance Team ( <a href="http://www.sanger.ac.uk/covid-team">http://www.sanger.ac.uk/covid-team</a> ); Roberto Amato; Sonia Goncalves; The Lighthouse Lab in Milton Keynes and Alex Alderton                                                                                                                                                                                                                                                                                                                                                                                                                                                                                                                                                                                                                                                                                                                                                                                                                                                                                                                                                                                                                                                                                                                                                                                                                                                                                                                                                                                                                                                                                                                                                                                                                                                                                                                            |
| EPI_ISL_550383, EPI_ISL_551626, EPI_ISL_552332, EPI_ISL_566607, EPI_ISL_575829, EPI_ISL_581345, EPI_ISL_589043, EPI_ISL_601410, EPI_ISL_601519, EPI_ISL_606707, EPI_ISL_607390, EPI_ISL_623580, EPI_ISL_623596, EPI_ISL_629321                                                                                                                                                                                                                                                                                                                                                                                                                                                                                                                                                                                                                                                                                                                                                                                                                                                                                                                                                                                                                                                                                                                                                                                                                                                                                                                                                                                                                                                                                                                                                                                                                                                                                                                                                                                                                                                                                                                                                                                                                                                                                                                                                                                                                                                                                                                                                                                                                                                                                                                                                                                                                                                                                                                                                                                                                                                                                                                                                                                                                                                                                        |                                                                                                                                                                                                                      |                                                                                                                                                                                                                                                                                                                    |                                                                                                                                                                                                                                                                                                                                                                                                                                                                                                                                                                                                                                                                                                                                                                                                                                                                                                                                                                                                                                                                                                                                                                                                                                                                                                                                                                                                                                                                                                                                                                                                                                                                                                                                                                                                                                                                                                                                                                                                                                                                                                                                                                                            |
| see above                                                                                                                                                                                                                                                                                                                                                                                                                                                                                                                                                                                                                                                                                                                                                                                                                                                                                                                                                                                                                                                                                                                                                                                                                                                                                                                                                                                                                                                                                                                                                                                                                                                                                                                                                                                                                                                                                                                                                                                                                                                                                                                                                                                                                                                                                                                                                                                                                                                                                                                                                                                                                                                                                                                                                                                                                                                                                                                                                                                                                                                                                                                                                                                                                                                                                                             | Lighthouse Lab in Milton Keynes                                                                                                                                                                                      | Wellcome Sanger Institute for the COVID-19 Genomics UK (COG-UK) consortium                                                                                                                                                                                                                                         | Cordelia Langford; David K. Jackson; Dominic Kwiatkowski; Ewan Harrison; Ian Johnston; John Sillitoe on behalf of the Wellcome Sanger Institute COVID-19 Surveillance Team; John Sillitoe on behalf of the Wellcome Sanger Institute COVID-19 Surveillance Team ( <a href="http://www.sanger.ac.uk/covid-team">http://www.sanger.ac.uk/covid-team</a> ); Roberto Amato; Sonia Goncalves; The Lighthouse Lab in Milton Keynes and Alex Alderton                                                                                                                                                                                                                                                                                                                                                                                                                                                                                                                                                                                                                                                                                                                                                                                                                                                                                                                                                                                                                                                                                                                                                                                                                                                                                                                                                                                                                                                                                                                                                                                                                                                                                                                                             |
| EPI_ISL_3201677, EPI_ISL_3201855, EPI_ISL_3202756, EPI_ISL_3202759, EPI_ISL_3202773, EPI_ISL_3202915, EPI_ISL_3202921, EPI_ISL_3202943, EPI_ISL_3202943, EPI_ISL_3203110, EPI_ISL_3203122, EPI_ISL_3221494, EPI_ISL_3221589, EPI_ISL_3221640, EPI_ISL_3221693, EPI_ISL_3221967, EPI_ISL_3221969, EPI_ISL_3222041, EPI_ISL_3222142, EPI_ISL_3222554, EPI_ISL_3222564, EPI_ISL_3222620, EPI_ISL_3222657, EPI_ISL_3222805, EPI_ISL_3222850, EPI_ISL_3222925, EPI_ISL_3222938, EPI_ISL_3223306, EPI_ISL_3223401, EPI_ISL_3223426, EPI_ISL_3223472, EPI_ISL_3223631, EPI_ISL_3223639, EPI_ISL_3223648, EPI_ISL_3223887, EPI_ISL_3224923, EPI_ISL_3225130, EPI_ISL_3225229, EPI_ISL_3225301, EPI_ISL_3225563, EPI_ISL_3227304, EPI_ISL_3227374, EPI_ISL_3227734, EPI_ISL_3247851, EPI_ISL_3247999, EPI_ISL_3248066, EPI_ISL_3249886, EPI_ISL_3249948, EPI_ISL_3250201, EPI_ISL_3250206, EPI_ISL_3250223, EPI_ISL_3250245, EPI_ISL_3281893, EPI_ISL_3281957, EPI_ISL_3282025, EPI_ISL_3282066, EPI_ISL_3282933, EPI_ISL_3283907, EPI_ISL_3284023, EPI_ISL_3284030, EPI_ISL_3284055, EPI_ISL_3284158, EPI_ISL_3286908, EPI_ISL_3286920                                                                                                                                                                                                                                                                                                                                                                                                                                                                                                                                                                                                                                                                                                                                                                                                                                                                                                                                                                                                                                                                                                                                                                                                                                                                                                                                                                                                                                                                                                                                                                                                                                                                                                                                                                                                                                                                                                                                                                                                                                                                                                                                                                                        |                                                                                                                                                                                                                      |                                                                                                                                                                                                                                                                                                                    |                                                                                                                                                                                                                                                                                                                                                                                                                                                                                                                                                                                                                                                                                                                                                                                                                                                                                                                                                                                                                                                                                                                                                                                                                                                                                                                                                                                                                                                                                                                                                                                                                                                                                                                                                                                                                                                                                                                                                                                                                                                                                                                                                                                            |
| see above                                                                                                                                                                                                                                                                                                                                                                                                                                                                                                                                                                                                                                                                                                                                                                                                                                                                                                                                                                                                                                                                                                                                                                                                                                                                                                                                                                                                                                                                                                                                                                                                                                                                                                                                                                                                                                                                                                                                                                                                                                                                                                                                                                                                                                                                                                                                                                                                                                                                                                                                                                                                                                                                                                                                                                                                                                                                                                                                                                                                                                                                                                                                                                                                                                                                                                             | Lighthouse Laboratory Plymouth                                                                                                                                                                                       | Wellcome Sanger Institute for the COVID-19 Genomics UK (COG-UK) Consortium                                                                                                                                                                                                                                         | Cordelia Langford; David K. Jackson; Dominic Kwiatkowski; Ewan Harrison; Ian Johnston; Jeffrey Barrett; John Sillitoe on behalf of the Wellcome Sanger Institute COVID-19 Surveillance Team; Lighthouse Laboratory Plymouth and Alex Alderton; Roberto Amato; Sonia Goncalves                                                                                                                                                                                                                                                                                                                                                                                                                                                                                                                                                                                                                                                                                                                                                                                                                                                                                                                                                                                                                                                                                                                                                                                                                                                                                                                                                                                                                                                                                                                                                                                                                                                                                                                                                                                                                                                                                                              |
| EPI_ISL_1846761                                                                                                                                                                                                                                                                                                                                                                                                                                                                                                                                                                                                                                                                                                                                                                                                                                                                                                                                                                                                                                                                                                                                                                                                                                                                                                                                                                                                                                                                                                                                                                                                                                                                                                                                                                                                                                                                                                                                                                                                                                                                                                                                                                                                                                                                                                                                                                                                                                                                                                                                                                                                                                                                                                                                                                                                                                                                                                                                                                                                                                                                                                                                                                                                                                                                                                       | Limbach - Ganzimmun Diagnostics AG Mainz                                                                                                                                                                             | Robert Koch Institute                                                                                                                                                                                                                                                                                              |                                                                                                                                                                                                                                                                                                                                                                                                                                                                                                                                                                                                                                                                                                                                                                                                                                                                                                                                                                                                                                                                                                                                                                                                                                                                                                                                                                                                                                                                                                                                                                                                                                                                                                                                                                                                                                                                                                                                                                                                                                                                                                                                                                                            |
| EPI_ISL_1567222, EPI_ISL_1567259, EPI_ISL_1573317, EPI_ISL_1727514, EPI_ISL_1853204                                                                                                                                                                                                                                                                                                                                                                                                                                                                                                                                                                                                                                                                                                                                                                                                                                                                                                                                                                                                                                                                                                                                                                                                                                                                                                                                                                                                                                                                                                                                                                                                                                                                                                                                                                                                                                                                                                                                                                                                                                                                                                                                                                                                                                                                                                                                                                                                                                                                                                                                                                                                                                                                                                                                                                                                                                                                                                                                                                                                                                                                                                                                                                                                                                   | Limbach - MVZ Humangenetik Ulm                                                                                                                                                                                       | Robert Koch Institute                                                                                                                                                                                                                                                                                              |                                                                                                                                                                                                                                                                                                                                                                                                                                                                                                                                                                                                                                                                                                                                                                                                                                                                                                                                                                                                                                                                                                                                                                                                                                                                                                                                                                                                                                                                                                                                                                                                                                                                                                                                                                                                                                                                                                                                                                                                                                                                                                                                                                                            |
| EPI_ISL_2128991, EPI_ISL_1352284, EPI_ISL_2123833, EPI_ISL_3221208                                                                                                                                                                                                                                                                                                                                                                                                                                                                                                                                                                                                                                                                                                                                                                                                                                                                                                                                                                                                                                                                                                                                                                                                                                                                                                                                                                                                                                                                                                                                                                                                                                                                                                                                                                                                                                                                                                                                                                                                                                                                                                                                                                                                                                                                                                                                                                                                                                                                                                                                                                                                                                                                                                                                                                                                                                                                                                                                                                                                                                                                                                                                                                                                                                                    | Limbach - MVZ Labor EVELD & Kollegen Essen<br>Limbach - MVZ Labor Ludwigsburg<br>Limbach - MVZ Labor Ravensburg Labor Dr. Gartner<br>Louisiana Office of Public Health Laboratory                                    | Robert Koch Institute<br>Robert Koch Institute<br>Robert Koch Institute<br>LSUHS Emerging Viral Threat Laboratory                                                                                                                                                                                                  | Alexander Mijalis; Andrew D. Yurochko; Christopher G. Kevil; Gregory L. Ware; Jennifer L. Carroll; Jeremy P. Kamil; John A. Vanchiere; Maarten Van Diest; Rona S. Scott                                                                                                                                                                                                                                                                                                                                                                                                                                                                                                                                                                                                                                                                                                                                                                                                                                                                                                                                                                                                                                                                                                                                                                                                                                                                                                                                                                                                                                                                                                                                                                                                                                                                                                                                                                                                                                                                                                                                                                                                                    |
| EPI_ISL_1704726                                                                                                                                                                                                                                                                                                                                                                                                                                                                                                                                                                                                                                                                                                                                                                                                                                                                                                                                                                                                                                                                                                                                                                                                                                                                                                                                                                                                                                                                                                                                                                                                                                                                                                                                                                                                                                                                                                                                                                                                                                                                                                                                                                                                                                                                                                                                                                                                                                                                                                                                                                                                                                                                                                                                                                                                                                                                                                                                                                                                                                                                                                                                                                                                                                                                                                       | Lurie Children's Hospital of Chicago                                                                                                                                                                                 | Northwestern University - Ozer Lab                                                                                                                                                                                                                                                                                 | Egon A. Ozer; Judd F. Hultquist; Lacy M. Simons; Larry K. Kocielek; Michael G. Ison; Ramon Lorenzo-Redondo; Taylor J. Dean; William J. Muller; Xiaotian; Zheng                                                                                                                                                                                                                                                                                                                                                                                                                                                                                                                                                                                                                                                                                                                                                                                                                                                                                                                                                                                                                                                                                                                                                                                                                                                                                                                                                                                                                                                                                                                                                                                                                                                                                                                                                                                                                                                                                                                                                                                                                             |
| EPI_ISL_1132758, EPI_ISL_1531719, EPI_ISL_451151                                                                                                                                                                                                                                                                                                                                                                                                                                                                                                                                                                                                                                                                                                                                                                                                                                                                                                                                                                                                                                                                                                                                                                                                                                                                                                                                                                                                                                                                                                                                                                                                                                                                                                                                                                                                                                                                                                                                                                                                                                                                                                                                                                                                                                                                                                                                                                                                                                                                                                                                                                                                                                                                                                                                                                                                                                                                                                                                                                                                                                                                                                                                                                                                                                                                      | M Health Fairview<br>M.P Shah Government Medocal college Jamnagar                                                                                                                                                    | Minnesota Department of Health, Public Health Laboratory<br>Gujarat Biotechnology Research Centre                                                                                                                                                                                                                  | Alexandra Lorentz; Jacob Garffin; Matt Plumb; and Xiong Wang<br>; A M Kadri; Amit Kanani; Ankit Hinsu; Apurvashin Puvav; Bhavesh Modi; Binita Aring; Chaitanya Jishi; Dinesh Kumar; Gaurishankar Shrimali; Janvi Raval; Komal Patel; Labdhi Pandya; Madhvi Joshi; Maharshi Pandya; Monika Gandhi; Neha Rajpara; Nidhi Patel; Nitin Savaliya; Pinal Trivedi; Pritesh Sabara; R D Dixit; Raghwendra Kumar; Ramesh Pandit; Snehal Bagatharia; Tejas Shah; Zarra Patel; Zuber Saiyed                                                                                                                                                                                                                                                                                                                                                                                                                                                                                                                                                                                                                                                                                                                                                                                                                                                                                                                                                                                                                                                                                                                                                                                                                                                                                                                                                                                                                                                                                                                                                                                                                                                                                                           |
| EPI_ISL_1821082, EPI_ISL_1594285, EPI_ISL_2495539                                                                                                                                                                                                                                                                                                                                                                                                                                                                                                                                                                                                                                                                                                                                                                                                                                                                                                                                                                                                                                                                                                                                                                                                                                                                                                                                                                                                                                                                                                                                                                                                                                                                                                                                                                                                                                                                                                                                                                                                                                                                                                                                                                                                                                                                                                                                                                                                                                                                                                                                                                                                                                                                                                                                                                                                                                                                                                                                                                                                                                                                                                                                                                                                                                                                     | MAWD Pathology Group, PA<br>MB-Cadham Provincial laboratory                                                                                                                                                          | MAWD Pathology Group, PA<br>National Microbiology Laboratory (NML)                                                                                                                                                                                                                                                 | Kelli Fayard; Kelsi Eastman; London Collins; Ph D; Pradip Manna; Shelby Herner<br>Anna Majer; Anneliese Landgraff; CanCOGen's metadata curation team; Darian Hole; David Alexander; Elsie Grudeski; Gary Van Domselaar; Grace Seo; Jared Bullard; Jennifer Tanner; Kerry Dust; Kirsten Biggar; Madison Chapel; Morag Graham; Natalie Knox; Nathalie Bastien; Paul Van Caeseele; Philip Mabon; Public Health Agency of Canada CanCOGen team; Rhianonn Huzarewich; Russell Mandes; Shari Tyson; Timothy Booth; Yan Li                                                                                                                                                                                                                                                                                                                                                                                                                                                                                                                                                                                                                                                                                                                                                                                                                                                                                                                                                                                                                                                                                                                                                                                                                                                                                                                                                                                                                                                                                                                                                                                                                                                                        |
| EPI_ISL_1575170, EPI_ISL_1576789, EPI_ISL_3241905                                                                                                                                                                                                                                                                                                                                                                                                                                                                                                                                                                                                                                                                                                                                                                                                                                                                                                                                                                                                                                                                                                                                                                                                                                                                                                                                                                                                                                                                                                                                                                                                                                                                                                                                                                                                                                                                                                                                                                                                                                                                                                                                                                                                                                                                                                                                                                                                                                                                                                                                                                                                                                                                                                                                                                                                                                                                                                                                                                                                                                                                                                                                                                                                                                                                     | MD PHL                                                                                                                                                                                                               | MD PHL                                                                                                                                                                                                                                                                                                             | Ami Patel; Eric N. Keller; Jillian Loomis; Kwang Low; Maryland Department of Health Laboratories Administration; Terence L. Moore; and Robert Myers                                                                                                                                                                                                                                                                                                                                                                                                                                                                                                                                                                                                                                                                                                                                                                                                                                                                                                                                                                                                                                                                                                                                                                                                                                                                                                                                                                                                                                                                                                                                                                                                                                                                                                                                                                                                                                                                                                                                                                                                                                        |
| EPI_ISL_3235577, EPI_ISL_3235641                                                                                                                                                                                                                                                                                                                                                                                                                                                                                                                                                                                                                                                                                                                                                                                                                                                                                                                                                                                                                                                                                                                                                                                                                                                                                                                                                                                                                                                                                                                                                                                                                                                                                                                                                                                                                                                                                                                                                                                                                                                                                                                                                                                                                                                                                                                                                                                                                                                                                                                                                                                                                                                                                                                                                                                                                                                                                                                                                                                                                                                                                                                                                                                                                                                                                      | MD PHL                                                                                                                                                                                                               | Maryland Department of Health Laboratories Administration                                                                                                                                                                                                                                                          | Ami Patel; Eric N. Keller; Jillian Loomis; Kwang Low; Terence L. Moore; and Robert Myers                                                                                                                                                                                                                                                                                                                                                                                                                                                                                                                                                                                                                                                                                                                                                                                                                                                                                                                                                                                                                                                                                                                                                                                                                                                                                                                                                                                                                                                                                                                                                                                                                                                                                                                                                                                                                                                                                                                                                                                                                                                                                                   |
| EPI_ISL_1567662, EPI_ISL_1847440, EPI_ISL_2112784                                                                                                                                                                                                                                                                                                                                                                                                                                                                                                                                                                                                                                                                                                                                                                                                                                                                                                                                                                                                                                                                                                                                                                                                                                                                                                                                                                                                                                                                                                                                                                                                                                                                                                                                                                                                                                                                                                                                                                                                                                                                                                                                                                                                                                                                                                                                                                                                                                                                                                                                                                                                                                                                                                                                                                                                                                                                                                                                                                                                                                                                                                                                                                                                                                                                     | MDI Limbach Berlin GmbH; MVZ Labor Berlin                                                                                                                                                                            | Robert Koch Institute                                                                                                                                                                                                                                                                                              |                                                                                                                                                                                                                                                                                                                                                                                                                                                                                                                                                                                                                                                                                                                                                                                                                                                                                                                                                                                                                                                                                                                                                                                                                                                                                                                                                                                                                                                                                                                                                                                                                                                                                                                                                                                                                                                                                                                                                                                                                                                                                                                                                                                            |
| EPI_ISL_3230832, EPI_ISL_1227791, EPI_ISL_1227795, EPI_ISL_1227845                                                                                                                                                                                                                                                                                                                                                                                                                                                                                                                                                                                                                                                                                                                                                                                                                                                                                                                                                                                                                                                                                                                                                                                                                                                                                                                                                                                                                                                                                                                                                                                                                                                                                                                                                                                                                                                                                                                                                                                                                                                                                                                                                                                                                                                                                                                                                                                                                                                                                                                                                                                                                                                                                                                                                                                                                                                                                                                                                                                                                                                                                                                                                                                                                                                    | MEDILAB<br>MEMORIAL SLOAN KETTERING CANCER CENTER                                                                                                                                                                    | CHU Poitiers<br>Wadsworth Center, New York State Department of Health                                                                                                                                                                                                                                              | Agnes BEBY-DEFAUX; Birama N'DIAYE; Caroline MICHAUD; Magali GARCIA; Manon PRAT; Maxime PICHON; Nicolas LEVEQUE; Valentin BOM-BARET<br>Alexis Russel; Daryl M. Lamson; Erasmus Schneider; Erica Lasek-Nesselquist; John Kelly; Jonathan Pitnick; Kirsten St. George; Matthew Shudt; Melissa A Leisner; Navjot Singh                                                                                                                                                                                                                                                                                                                                                                                                                                                                                                                                                                                                                                                                                                                                                                                                                                                                                                                                                                                                                                                                                                                                                                                                                                                                                                                                                                                                                                                                                                                                                                                                                                                                                                                                                                                                                                                                         |
| EPI_ISL_413571, EPI_ISL_413568, EPI_ISL_413566, EPI_ISL_413577, EPI_ISL_413572, EPI_ISL_413583, EPI_ISL_413588                                                                                                                                                                                                                                                                                                                                                                                                                                                                                                                                                                                                                                                                                                                                                                                                                                                                                                                                                                                                                                                                                                                                                                                                                                                                                                                                                                                                                                                                                                                                                                                                                                                                                                                                                                                                                                                                                                                                                                                                                                                                                                                                                                                                                                                                                                                                                                                                                                                                                                                                                                                                                                                                                                                                                                                                                                                                                                                                                                                                                                                                                                                                                                                                        | MHC Brabant Zuidoost<br>MHC Drente<br>MHC Gooi & Vechtstreek<br>MHC Kennemerland<br>MHC Rotterdam-Rijnmond<br>MHC Utrecht                                                                                            | Erasmus Medical Center<br>Erasmus Medical Center<br>Erasmus Medical Center<br>Erasmus Medical Center<br>Erasmus Medical Center<br>Erasmus Medical Center                                                                                                                                                           | Anne van der Linden; Anнемiek van der Eijk; Aura Timen; Bas Oude Munnink; Claudia Schapendonk; Corien Swaan; Corine Geurtsvankessel; David Nieuwenhuijse; Irina Chestakova; Jeroen van Kampen; Jolanda Voermans; Madelief Molliers; Manon Haverkate; Marion Koopmans; Mark Pronk; Mart Stein; Pascal Lexmond; Reina Sikkema; Richard Molenkamp; Sandra Kengne Kamga Mobou; on behalf of the Dutch national COVID-19 response team.<br>Anne van der Linden; Anнемiek van der Eijk; Aura Timen; Bas Oude Munnink; Claudia Schapendonk; Corien Swaan; Corine Geurtsvankessel; David Nieuwenhuijse; Irina Chestakova; Jeroen van Kampen; Jolanda Voermans; Madelief Molliers; Manon Haverkate; Marion Koopmans; Mark Pronk; Mart Stein; Pascal Lexmond; Reina Sikkema; Richard Molenkamp; Sandra Kengne Kamga Mobou; on behalf of the Dutch national COVID-19 response team.<br>Anne van der Linden; Anнемiek van der Eijk; Aura Timen; Bas Oude Munnink; Claudia Schapendonk; Corien Swaan; Corine Geurtsvankessel; David Nieuwenhuijse; Irina Chestakova; Jeroen van Kampen; Jolanda Voermans; Madelief Molliers; Manon Haverkate; Marion Koopmans; Mark Pronk; Mart Stein; Pascal Lexmond; Reina Sikkema; Richard Molenkamp; Sandra Kengne Kamga Mobou; on behalf of the Dutch national COVID-19 response team.<br>Anne van der Linden; Anнемiek van der Eijk; Aura Timen; Bas Oude Munnink; Claudia Schapendonk; Corien Swaan; Corine Geurtsvankessel; David Nieuwenhuijse; Irina Chestakova; Jeroen van Kampen; Jolanda Voermans; Madelief Molliers; Manon Haverkate; Marion Koopmans; Mark Pronk; Mart Stein; Pascal Lexmond; Reina Sikkema; Richard Molenkamp; Sandra Kengne Kamga Mobou; on behalf of the Dutch national COVID-19 response team.<br>Anne van der Linden; Anнемiek van der Eijk; Aura Timen; Bas Oude Munnink; Claudia Schapendonk; Corien Swaan; Corine Geurtsvankessel; David Nieuwenhuijse; Irina Chestakova; Jeroen van Kampen; Jolanda Voermans; Madelief Molliers; Manon Haverkate; Marion Koopmans; Mark Pronk; Mart Stein; Pascal Lexmond; Reina Sikkema; Richard Molenkamp; Sandra Kengne Kamga Mobou; on behalf of the Dutch national COVID-19 response team. |
| EPI_ISL_3242029, EPI_ISL_3242031, EPI_ISL_3242062, EPI_ISL_1227316, EPI_ISL_1469346                                                                                                                                                                                                                                                                                                                                                                                                                                                                                                                                                                                                                                                                                                                                                                                                                                                                                                                                                                                                                                                                                                                                                                                                                                                                                                                                                                                                                                                                                                                                                                                                                                                                                                                                                                                                                                                                                                                                                                                                                                                                                                                                                                                                                                                                                                                                                                                                                                                                                                                                                                                                                                                                                                                                                                                                                                                                                                                                                                                                                                                                                                                                                                                                                                   | MI - Michigan Department of Health and Human Services - Bureau of Laboratories<br>MN PHL Division, Minnesota Department of Health<br>MONTEFIORE MEDICAL CENTER LABORATORIES<br>MRC/JVRI & LSHTM Uganda Research Unit | Centers for Disease Control and Prevention Division of Viral Diseases, Pathogen Discovery<br>Centers for Disease Control and Prevention Division of Viral Diseases, Pathogen Discovery<br>Wadsworth Center, New York State Department of Health<br>Where sequence data have been generated and submitted to GISAID | Alex Burgin; Ben L. Rambo-Martin; Clinton R. Paden; Dakota Howard; Dave Wentworth; Dhvani Batra; Jasmine Padilla; Justin Lee; Krista Queen; Kristen Kripe; Kristine Lacey; Mark Burroughs; Matthew Schmerer; Meghan Bentz; Mili Sheth; Peter Cook; Sam Shepard; Sarah Nobles; Suxiang Tong; Vivien Dugan; Yvette Unarumhi<br>Alex Burgin; Ben L. Rambo-Martin; Clinton R. Paden; Dakota Howard; Dave Wentworth; Dhvani Batra; Jasmine Padilla; Justin Lee; Krista Queen; Kristen Kripe; Kristine Lacey; Mark Burroughs; Matthew Schmerer; Meghan Bentz; Mili Sheth; Peter Cook; Sam Shepard; Sarah Nobles; Suxiang Tong; Vivien Dugan; Yvette Unarumhi<br>Alexis Russel; Daryl M. Lamson; Erasmus Schneider; Erica Lasek-Nesselquist; John Kelly; Jonathan Pitnick; Kirsten St. George; Matthew Shudt; Melissa A Leisner; Navjot Singh<br>Dan Lule Bugembe; Isaac Sseeewanyana; Matthew Cotten; My V.T. Phan; Patrick Semanda; Pontiano Kaleebu; Susan Nabadda                                                                                                                                                                                                                                                                                                                                                                                                                                                                                                                                                                                                                                                                                                                                                                                                                                                                                                                                                                                                                                                                                                                                                                                                                             |
| EPI_ISL_414476, EPI_ISL_415151, EPI_ISL_1300871, EPI_ISL_1300985, EPI_ISL_1709103, EPI_ISL_1709325, EPI_ISL_1709518, EPI_ISL_1709554, EPI_ISL_1709570, EPI_ISL_1709588, EPI_ISL_1709748                                                                                                                                                                                                                                                                                                                                                                                                                                                                                                                                                                                                                                                                                                                                                                                                                                                                                                                                                                                                                                                                                                                                                                                                                                                                                                                                                                                                                                                                                                                                                                                                                                                                                                                                                                                                                                                                                                                                                                                                                                                                                                                                                                                                                                                                                                                                                                                                                                                                                                                                                                                                                                                                                                                                                                                                                                                                                                                                                                                                                                                                                                                               |                                                                                                                                                                                                                      |                                                                                                                                                                                                                                                                                                                    |                                                                                                                                                                                                                                                                                                                                                                                                                                                                                                                                                                                                                                                                                                                                                                                                                                                                                                                                                                                                                                                                                                                                                                                                                                                                                                                                                                                                                                                                                                                                                                                                                                                                                                                                                                                                                                                                                                                                                                                                                                                                                                                                                                                            |
| see above                                                                                                                                                                                                                                                                                                                                                                                                                                                                                                                                                                                                                                                                                                                                                                                                                                                                                                                                                                                                                                                                                                                                                                                                                                                                                                                                                                                                                                                                                                                                                                                                                                                                                                                                                                                                                                                                                                                                                                                                                                                                                                                                                                                                                                                                                                                                                                                                                                                                                                                                                                                                                                                                                                                                                                                                                                                                                                                                                                                                                                                                                                                                                                                                                                                                                                             | MSHS Clinical Microbiology Laboratories                                                                                                                                                                              | MSHS Pathogen Surveillance Program                                                                                                                                                                                                                                                                                 | Adolfo Garcia-Sarstre; Adolfo Garcia-Sarstre; Adriana van de Guchte; Ajay Obla; Alberto Paniz-Mondolfi; Alberto Paniz-mondolfi; Ana S. Gonzalez-Reiche; Ana Silvia Gonzalez-Reiche; Ana Sylvia Gonzalez-Reiche; Angela Amoako; Ashley Salimbangon; Betsaida Salom Melo; B्रेmy Albuquerque; Brianne Ciferri; Charles Gleason; Daniel Floda; Deena R. Altman; Denise Jurczynski; Emilia Mia Sordillo; Emilia Sordillo; Florian Krammer; Gintaras Delkus; Giulio Kleiner; Gopi Patel; Hala Alshammary; Harm van Bakel; Irina Oussenko; Jayeeta Dutta; Jose Polanco; Juan Soto; Judith Aberg; Julia Matthews; Katherine Beach; Kathryn Tuyman; Kayla Russo; Komal Srivastava; Levy Saminsky; Lisa Miorin; Mahmoud Awawda; Marta Lukasz; Matthew Hernandez; Matthew M. Hernandez; Melissa Gitman; Melissa Smith; Michael D. Nowak; Mitchell J. Sullivan; Nancy Francoeur; Randy Albrecht; Robert Sebra; Sarah Schaefer; Shélicie Fabre; Shwetha Hara Sridhar; Viviana Simon; Wen-chun Liu; Ying-Chih Wang; Zenab Khan                                                                                                                                                                                                                                                                                                                                                                                                                                                                                                                                                                                                                                                                                                                                                                                                                                                                                                                                                                                                                                                                                                                                                                          |
| EPI_ISL_631293, EPI_ISL_2108350, EPI_ISL_2115404, EPI_ISL_1722149, EPI_ISL_1284504                                                                                                                                                                                                                                                                                                                                                                                                                                                                                                                                                                                                                                                                                                                                                                                                                                                                                                                                                                                                                                                                                                                                                                                                                                                                                                                                                                                                                                                                                                                                                                                                                                                                                                                                                                                                                                                                                                                                                                                                                                                                                                                                                                                                                                                                                                                                                                                                                                                                                                                                                                                                                                                                                                                                                                                                                                                                                                                                                                                                                                                                                                                                                                                                                                    | MVZ DIAMEDIS Diagnostische Medizin Sennestadt GmbH<br>MVZ Dr. Eberhard & Partner Dortmund<br>MVZ Labor Dr. Fenner und Kollegen (Standort Hamburg)<br>MVZ Labor Dr. Limbach & Kollegen GbR                            | Bielefeld University<br>Robert Koch Institute<br>Robert Koch Institute<br>Robert Koch Institute                                                                                                                                                                                                                    | Alexander Sczyrba; Christiane Scherer; David Brandt; Jörn Kalinowski; Levin-Joe Klages; Marina Simunovic; Markus Haak; Svenja Vinke; Tobias Busche                                                                                                                                                                                                                                                                                                                                                                                                                                                                                                                                                                                                                                                                                                                                                                                                                                                                                                                                                                                                                                                                                                                                                                                                                                                                                                                                                                                                                                                                                                                                                                                                                                                                                                                                                                                                                                                                                                                                                                                                                                         |

|                                                                                                                                                                                                                                                                                                                                                                                                                                                          |                                                                                                                 |                                                                                                                                            |                                                                                                                                                                                                                                                                                                                                                                                                                               |                                                                                                                                                                                                                                                                                                        |
|----------------------------------------------------------------------------------------------------------------------------------------------------------------------------------------------------------------------------------------------------------------------------------------------------------------------------------------------------------------------------------------------------------------------------------------------------------|-----------------------------------------------------------------------------------------------------------------|--------------------------------------------------------------------------------------------------------------------------------------------|-------------------------------------------------------------------------------------------------------------------------------------------------------------------------------------------------------------------------------------------------------------------------------------------------------------------------------------------------------------------------------------------------------------------------------|--------------------------------------------------------------------------------------------------------------------------------------------------------------------------------------------------------------------------------------------------------------------------------------------------------|
| EPI_ISL_1572104,<br>EPI_ISL_1642355,<br>EPI_ISL_3237824                                                                                                                                                                                                                                                                                                                                                                                                  |                                                                                                                 |                                                                                                                                            |                                                                                                                                                                                                                                                                                                                                                                                                                               |                                                                                                                                                                                                                                                                                                        |
| EPI_ISL_1281877,<br>EPI_ISL_1349173,<br>EPI_ISL_1434552,<br>EPI_ISL_1440908,<br>EPI_ISL_1844345                                                                                                                                                                                                                                                                                                                                                          | MVZ Labor Krone GbR                                                                                             | Robert Koch Institute                                                                                                                      |                                                                                                                                                                                                                                                                                                                                                                                                                               |                                                                                                                                                                                                                                                                                                        |
| EPI_ISL_1572172                                                                                                                                                                                                                                                                                                                                                                                                                                          | MVZ Medizinisches Labor Hannover GmbH                                                                           | Robert Koch Institute                                                                                                                      |                                                                                                                                                                                                                                                                                                                                                                                                                               |                                                                                                                                                                                                                                                                                                        |
| EPI_ISL_1936113,<br>EPI_ISL_1936128,<br>EPI_ISL_1936139,<br>EPI_ISL_1936250,<br>EPI_ISL_1936267,<br>EPI_ISL_1936340                                                                                                                                                                                                                                                                                                                                      | Main Chemical Laboratories Egypt Army                                                                           | Main Chemical Laboratories<br>Egypt Army                                                                                                   | Abdullah Salama; AbedEirahman Zekri; Ahmed Gad; Bassem Elharty; Laila Elsayw; Mervat Hassan; Mohamed Seadawy; Mohamed Shamel; Mostfa Elhoseiny; Mostfa Yakout; Ola Elroby; Sabah Ahmed; Sherine Helmy                                                                                                                                                                                                                         |                                                                                                                                                                                                                                                                                                        |
| EPI_ISL_1826433, EPI_ISL_1972986, EPI_ISL_1973043, EPI_ISL_3186507, EPI_ISL_3186521, EPI_ISL_6532563, EPI_ISL_6532631, EPI_ISL_6532656, EPI_ISL_6532670, EPI_ISL_6532731                                                                                                                                                                                                                                                                                 | see above                                                                                                       | Maine Health and Environmental Testing Laboratory                                                                                          | Tewhey Lab, The Jackson<br>Laboratory                                                                                                                                                                                                                                                                                                                                                                                         | Barter, M.; Dewey, H.; H. and Tewhey, R.; Iosue, F.; Lynch, R.; Matluk, N.; Munger                                                                                                                                                                                                                     |
| EPI_ISL_2157169                                                                                                                                                                                                                                                                                                                                                                                                                                          | Mapmygenome                                                                                                     | CSIR-Centre for Cellular and<br>Molecular Biology - INSACOG                                                                                | Amareshwar Vodapalli; Ara Sreenivas; B Himasri; Divya Tej Sowpati; Karthik Bharadwaj Tallapaka; Lamuk Zaveri; Onkar Kulkarni; Rakesh K Mishra; Sharath Chandra Thota; Shreekant Verma; Sofia Banu; Viswajithe S L                                                                                                                                                                                                             |                                                                                                                                                                                                                                                                                                        |
| EPI_ISL_1335888                                                                                                                                                                                                                                                                                                                                                                                                                                          | Martha Friska Multatuli Hospital Medan                                                                          | Faculty of Medicine, Universitas<br>Sumatera Utara; Institute of<br>Tropical Disease, Universitas<br>Airlangga                             | Aldise M Nastri; Franciscus Ginting; Inke N D Lubis; Irbah R Nainggolan; Jezzy R Dewantari; Kafuzumi Shimizu; Krisnoadi Rahardjo; Maria I Lusida; Meliani; Mirzan Hasibuan; Muhammad Ichwan; R Andika D Cahyadi; R Lia Kusumawati; Ramadhan Bestari; Rima R Prasetya; Soetijpto; Yasuko Mori                                                                                                                                  |                                                                                                                                                                                                                                                                                                        |
| EPI_ISL_3276824                                                                                                                                                                                                                                                                                                                                                                                                                                          | Martin Luther King Jr. Community Hospital                                                                       | Los Angeles County Public<br>Health Laboratories                                                                                           |                                                                                                                                                                                                                                                                                                                                                                                                                               | P. Hemarajata et al.                                                                                                                                                                                                                                                                                   |
| EPI_ISL_1500313, EPI_ISL_1500353, EPI_ISL_1500357, EPI_ISL_1608638, EPI_ISL_1608717, EPI_ISL_1805199, EPI_ISL_2161615                                                                                                                                                                                                                                                                                                                                    | see above                                                                                                       | Maryland Genomics, Institute for<br>Genome Sciences, University of<br>Maryland School of Medicine                                          |                                                                                                                                                                                                                                                                                                                                                                                                                               | Aditya; Claire M; Fraser; Holly; Humphrys; Jacques; Kranthi; Lisa D; Luke J; Mehta; Mike; Ott; Ravel; Roussey; Sadzewicz; Sandra; Tallon; Vavikolanu                                                                                                                                                   |
| EPI_ISL_804598,<br>EPI_ISL_1015595                                                                                                                                                                                                                                                                                                                                                                                                                       | Maryland Public Health Laboratory                                                                               | Maryland Public Health<br>Laboratory                                                                                                       |                                                                                                                                                                                                                                                                                                                                                                                                                               | Maryland Department of Health Laboratories Administration                                                                                                                                                                                                                                              |
| EPI_ISL_409067                                                                                                                                                                                                                                                                                                                                                                                                                                           | Massachusetts Department of Public Health                                                                       | Pathogen Discovery, Respiratory<br>Viruses Branch, Division of Viral<br>Diseases, Centers for Diseases<br>Control and Prevention           | Anna Uehara; Brett L. Whitaker; Brian Lynch; Clinton R. Paden; Janna' R. Murray; Jing Zhang; Krista Queen; Lijuan Wang; Senthil Kumar K. Sakthivel; Shifaq Kamili; Stephen Lindstrom; Susan I. Gerber; Suxiang Tong; Xiaoyan Lu; Yan Li; Ying Tao                                                                                                                                                                             |                                                                                                                                                                                                                                                                                                        |
| EPI_ISL_1503707,<br>EPI_ISL_1527167                                                                                                                                                                                                                                                                                                                                                                                                                      | Massachusetts State Public Health Laboratory                                                                    | Massachusetts State Public<br>Health Laboratory                                                                                            |                                                                                                                                                                                                                                                                                                                                                                                                                               | Andrew Lang; Glen Gallagher; Sandra Smole; Timelia Fink                                                                                                                                                                                                                                                |
| EPI_ISL_1751505,<br>EPI_ISL_1752269,<br>EPI_ISL_2095035,<br>EPI_ISL_3233442,<br>EPI_ISL_3233448,<br>EPI_ISL_3233450                                                                                                                                                                                                                                                                                                                                      | Max von Pettenkofer Institute, Virology, National Reference Center for Retroviruses, LMU<br>Munich              | Laboratory for Functional<br>Genome Analysis; Dept.<br>Genomics; Gene Center of the<br>LMU Munich                                          |                                                                                                                                                                                                                                                                                                                                                                                                                               | Alexander Graf; Helmut Blum; Max Muenchhoff; Oliver Keppler; Stefan Krebs                                                                                                                                                                                                                              |
| EPI_ISL_1224746                                                                                                                                                                                                                                                                                                                                                                                                                                          | Mayo Clinic & Mayo Clinic Laboratories                                                                          | Minnesota Department of Health,<br>Public Health Laboratory                                                                                |                                                                                                                                                                                                                                                                                                                                                                                                                               | Alexandra Lorentz; Jacob Garfin; Matt Plumb; and Xiong Wang                                                                                                                                                                                                                                            |
| EPI_ISL_1797597                                                                                                                                                                                                                                                                                                                                                                                                                                          | Medical Center, Aircraft Carrier                                                                                | IRBA, 2MI                                                                                                                                  | Aissata Dia; Anthony Levasseur; Bakridine Mmadi Mrenda; Constance Lacrosse; Fabien Dutasta; Flavie Letois; Flora Nolent; Franck de Laval; Frédéric Janvier; Gaëtan Texier; Hervé Chaudet; Jacques Cobola; Joffrey Marchi; Meynard Jean-Baptiste; Olivier Gorgé; Vanessa Marbac; Vincent Pommier de Santi                                                                                                                      |                                                                                                                                                                                                                                                                                                        |
| EPI_ISL_515803                                                                                                                                                                                                                                                                                                                                                                                                                                           | Medical Diagnostics Services (MDS)                                                                              | KRISP, KZN Research Innovation<br>and Sequencing Platform                                                                                  |                                                                                                                                                                                                                                                                                                                                                                                                                               | ChimukangaraB; Giandhari J; Khan S; Lessells R; Mdlalose K; Pillay S; Tegally H; Wilkinson E; York D; de Oliveira T                                                                                                                                                                                    |
| EPI_ISL_1346713                                                                                                                                                                                                                                                                                                                                                                                                                                          | Medical Laboratories Duesseldorf                                                                                | Center of Medical Microbiology,<br>Virology, and Hospital Hygiene,<br>University of Duesseldorf                                            | Alexander Dilthey; Andreas Walker; Angelika Helmer; Christian Lange; Daniel Strelow; Jessica Nicolai; Jörg Timm; Klaus Pfeffer; Lisanna Hülse; Malte Kohns Vasconcelos; Maximilian Damagnez; Nadine Lübke; Tobias Wienemann; Torsten Houwaart                                                                                                                                                                                 |                                                                                                                                                                                                                                                                                                        |
| EPI_ISL_2107520                                                                                                                                                                                                                                                                                                                                                                                                                                          | Medical Laboratory Sciences, Arab American University                                                           | Medical Laboratory Sciences,<br>Arab American University                                                                                   |                                                                                                                                                                                                                                                                                                                                                                                                                               | Al-Jawabreh, A.; Al-Jawabreh, H.; Dumaidi, K.; Ereqat, S.; Nasereddin, A.                                                                                                                                                                                                                              |
| EPI_ISL_1254581, EPI_ISL_1317560, EPI_ISL_1490644, EPI_ISL_1797692, EPI_ISL_1819871, EPI_ISL_1820621, EPI_ISL_3229901, EPI_ISL_3232613, EPI_ISL_3266498                                                                                                                                                                                                                                                                                                  | see above                                                                                                       | Medical Microbiology Unit, Department for Laboratory Medicine, Drammen Hospital, Vestre<br>Viken Health Trust,                             | Norwegian Institute of Public<br>Health, Department of Virology                                                                                                                                                                                                                                                                                                                                                               | Atiya R Ali; Debec Nadia; Engebretsen Serina Beate; Garcia Llorente Ignacio; Hilde Elshaug; Hilde Vollan; Jon Bråte; Kamilla Heddeland Instefjord; Karoline Bragstad; Kathrine Stene-Johansen; Line Victoria Moen; Marie Paulsen Madsen; Olav Hungnes; Pedersen Benedikte Nevjen; Rasmus Riis Kopperud |
| EPI_ISL_3183204, EPI_ISL_3183212, EPI_ISL_3183233, EPI_ISL_3183235, EPI_ISL_3183242, EPI_ISL_3183247, EPI_ISL_3183283, EPI_ISL_3183285, EPI_ISL_3183291, EPI_ISL_3183308, EPI_ISL_3183310, EPI_ISL_3183314, EPI_ISL_3183316, EPI_ISL_3183317, EPI_ISL_3183319, EPI_ISL_3183320, EPI_ISL_3183321, EPI_ISL_3183323, EPI_ISL_3183335, EPI_ISL_3183347, EPI_ISL_3183744, EPI_ISL_3183752, EPI_ISL_3183753, EPI_ISL_3183773, EPI_ISL_3183811, EPI_ISL_3183814 | see above                                                                                                       | Medical Microbiology and Zoology Section, Okinawa Prefectural Institute of Health and<br>Environment                                       |                                                                                                                                                                                                                                                                                                                                                                                                                               | Hisako Kyan; Kentaro Itokawa; Makoto Kuroda; Masanori Hashino; Minoru Nidaira; Noriyuki Maeshiro; Rina Tanaka; Taketoshi Takara; Tetsuya Kakita; Tsuyoshi Kudeken; Tsuyoshi Sekizuka; Yumani Kuba                                                                                                      |
| EPI_ISL_3247348,<br>EPI_ISL_3247349                                                                                                                                                                                                                                                                                                                                                                                                                      | Medics Labor AG                                                                                                 | Clinical Bacteriology                                                                                                                      |                                                                                                                                                                                                                                                                                                                                                                                                                               | Adrian Egli; Alfredo Mari; Fanny Wegner; Hans Hirsch; Helena MB Seth-Smith; Julia Bielicki; Karoline Leuzinger; Manuel Battegay; Tim Roloff                                                                                                                                                            |
| EPI_ISL_1846376,<br>EPI_ISL_1852086                                                                                                                                                                                                                                                                                                                                                                                                                      | Medizinisches Labor Ostsachsen MVZ GbR Nebenbetriebsstätte Dresden                                              | Robert Koch Institute                                                                                                                      |                                                                                                                                                                                                                                                                                                                                                                                                                               |                                                                                                                                                                                                                                                                                                        |
| EPI_ISL_3186710,<br>EPI_ISL_3186721,<br>EPI_ISL_3186741,<br>EPI_ISL_3186851,<br>EPI_ISL_3187134                                                                                                                                                                                                                                                                                                                                                          | Medlab Pathology                                                                                                | NSW Health Pathology - Institute<br>of Clinical Pathology and Medical<br>Research; Westmead Hospital;<br>University of Sydney              |                                                                                                                                                                                                                                                                                                                                                                                                                               | Arnott A.; Draper J.; Gall M.; Martinez E.; Rockett R.; Sintchenko V.; on behalf of ICPMR                                                                                                                                                                                                              |
| EPI_ISL_3266065                                                                                                                                                                                                                                                                                                                                                                                                                                          | Melaka Hospital                                                                                                 | Institute for Medical Research,<br>Infectious Disease Research<br>Centre, National Institutes of<br>Health, Ministry of Health<br>Malaysia |                                                                                                                                                                                                                                                                                                                                                                                                                               | Anasir MI; Azizan MA; Kamel K; Mohd Zawawi Z; Ramly N; Robert F; Suppiah J; Thayan R                                                                                                                                                                                                                   |
| EPI_ISL_1905847,<br>EPI_ISL_1906010,<br>EPI_ISL_1906369                                                                                                                                                                                                                                                                                                                                                                                                  | Michigan Department of Health and Human Services, Bureau of Laboratories                                        | Michigan Department of Health<br>and Human Services, Bureau of<br>Laboratories                                                             |                                                                                                                                                                                                                                                                                                                                                                                                                               | Blankenship HM; Riner D; Soehnlen MK                                                                                                                                                                                                                                                                   |
| EPI_ISL_519057, EPI_ISL_519184, EPI_ISL_521458, EPI_ISL_522008, EPI_ISL_563184, EPI_ISL_640329, EPI_ISL_1913095                                                                                                                                                                                                                                                                                                                                          | see above                                                                                                       | Microbiological Diagnostic Unit - Public Health Laboratory (MDU-PHL)                                                                       | MDU-PHL                                                                                                                                                                                                                                                                                                                                                                                                                       | M.L.; N.L.; Sait; Sait, M.; Schultz M.; Schultz M.B.; Seemann T.; Seemann, T.; Sherry; Sherry, N.                                                                                                                                                                                                      |
| EPI_ISL_1372040                                                                                                                                                                                                                                                                                                                                                                                                                                          | Microbiology Department , Late Shri Lakhiram Agrawal Memory Hospital & College, Raigarh,<br>Chhattisgarh        | Institute of Life Sciences -<br>INSACOG                                                                                                    |                                                                                                                                                                                                                                                                                                                                                                                                                               | Ajay Parida; Amol M. Kanampalliwar; Arup Ghosh; Atimukta Jha; INSACOG Consortium; Punit Prasad; Rajeeb Swain; Rupesh Dash; Safal Walia; Shifu Aggarwal; Sunil K. Raghav                                                                                                                                |
| EPI_ISL_3138688                                                                                                                                                                                                                                                                                                                                                                                                                                          | Microbiology Department - University Hospital Brussel                                                           | Microbiology Department -<br>University Hospital Brussel                                                                                   |                                                                                                                                                                                                                                                                                                                                                                                                                               | Thomas Demuyser                                                                                                                                                                                                                                                                                        |
| EPI_ISL_3207010,<br>EPI_ISL_3281457,<br>EPI_ISL_3281463                                                                                                                                                                                                                                                                                                                                                                                                  | Microbiology Department, Laboratori Clínica Metropolitana Nord. Hospital Universitari Germans<br>Trias i Pujol  | Can Ruti SARS-CoV-2<br>Sequencing Hub<br>(HUGTIP/IsiCaixa/IGTP)                                                                            | Alba Sánchez; Alexia Paris; Anna Not; Antoni E Bordoy; Bonaventura Clotet; Cristina Casañ; David Panisello; Francesc Catala-Moll; Gemma Clara; Ignacio Blanco; Laia Soler; Lauro Sumoy; Marc Noguera-Julian; Maria Casadellà; Mariona Parera; Mercedes Guerrero; Montserrat Giménez; Pere-Joan Cardona; Pilar Armengol; Roger Paredes; Verónica Saludes; and Elisa Martró on behalf of the Can Ruti SARS-CoV-2 Sequencing Hub |                                                                                                                                                                                                                                                                                                        |
| EPI_ISL_1583575,<br>EPI_ISL_1583596,<br>EPI_ISL_1999844                                                                                                                                                                                                                                                                                                                                                                                                  | Microbiology Department, Laboratori Clínica Metropolitana Nord. Hospital Universitari Germans<br>Trias i Pujol. | Can Ruti SARS-CoV-2<br>Sequencing Hub<br>(HUGTIP/IsiCaixa/IGTP)                                                                            | Alba Sánchez; Anna Not; Antoni E Bordoy; Bonaventura Clotet; Cristina Casañ; Cristina Esteban; Francesc Catala-Moll; Gemma Clara; Ignacio Blanco; Marc Noguera-Julian; Maria Casadellà; Mariona Parera; Mercedes Guerrero; Montserrat Giménez; Pere-Joan Cardona; Pilar Armengol; Roger Paredes; Verónica Saludes; and Elisa Martró on behalf of the Can Ruti SARS-CoV-2 Sequencing Hub.                                      |                                                                                                                                                                                                                                                                                                        |
| EPI_ISL_6589453                                                                                                                                                                                                                                                                                                                                                                                                                                          | Microbiology Department, School of Medicine, Guilan University of Medical Sciences, Rasht, Iran                 | Genetics Research Center,<br>University of Social Welfare and                                                                              |                                                                                                                                                                                                                                                                                                                                                                                                                               | Ali Jafarpour; Ali Mojtahedi; Arash Salmannejad; Azam Ghaziasadi; Hossein Najmabadi; Kimia Kahrizi; Maryam Beheshtian; Marzieh Mohseni; Milad Zandi; Parsa ghafari; Zohreh Fattahi                                                                                                                     |



|                                                                                                                                                                                                                                                                                                                                                                                                                                                                          |                                                                                                          |                                                                                                                                                                                |                                                                                                                                                                                                                                                                                                                                                                                                                                                                                                     |
|--------------------------------------------------------------------------------------------------------------------------------------------------------------------------------------------------------------------------------------------------------------------------------------------------------------------------------------------------------------------------------------------------------------------------------------------------------------------------|----------------------------------------------------------------------------------------------------------|--------------------------------------------------------------------------------------------------------------------------------------------------------------------------------|-----------------------------------------------------------------------------------------------------------------------------------------------------------------------------------------------------------------------------------------------------------------------------------------------------------------------------------------------------------------------------------------------------------------------------------------------------------------------------------------------------|
| EPI_ISL_1242042, EPI_ISL_3189623, EPI_ISL_3233412                                                                                                                                                                                                                                                                                                                                                                                                                        | Microbiology Department, University Hospital Donostia                                                    | Rehabilitation Sciences<br>Microbiology Department,<br>University Hospital Donostia                                                                                            | Cilla G.; Gomez M; Marimon JM; Martin-Peñaranda T; Montes M; Piñeiro L; Sorrañain A                                                                                                                                                                                                                                                                                                                                                                                                                 |
| EPI_ISL_1478815, EPI_ISL_3241777, EPI_ISL_3266902                                                                                                                                                                                                                                                                                                                                                                                                                        | Microbiology Department. Complejo Hospitalario Universitario de Vigo                                     | Microbiology Department. Complejo Hospitalario Universitario de Vigo                                                                                                           | Alfaia N; Alfaya N; Alonso I; Alvarez M; Cabrera JJ; Carballo R; Cores O; Cortizo S; Davina C; Martinez L; Mediero G; Perez S; Potei C; Regueiro B; Rey S; Vasallo FJ; del-Campo V                                                                                                                                                                                                                                                                                                                  |
| EPI_ISL_3233538, EPI_ISL_3233561                                                                                                                                                                                                                                                                                                                                                                                                                                         | Microbiology Department. Complejo Hospitalario Universitario de Vigo                                     | Phylogenomics Lab, CINBIO, Universidade de Vigo                                                                                                                                | Benito Regueiro; David Posada; Diana Valverde; Iria Fernández-Silva; Jorge Julio Cabrera-Alvargonzález; Loretta De Chiara; Nair Varela; Nicolae Sapoval; Nuria Estévez-Gómez; Pilar Gallego-García; Sonia Pérez; Todd Treangen; Víctor del Campo                                                                                                                                                                                                                                                    |
| EPI_ISL_2106125                                                                                                                                                                                                                                                                                                                                                                                                                                                          | Microbiology Division, SC DHEC                                                                           | Microbiology Division, SC DHEC                                                                                                                                                 | Flores, H.; Freeman, J.                                                                                                                                                                                                                                                                                                                                                                                                                                                                             |
| EPI_ISL_1303088                                                                                                                                                                                                                                                                                                                                                                                                                                                          | Microbiology Division, South Carolina Department of Health and Environmental Control                     | Microbiology Division, South Carolina Department of Health and Environmental Control                                                                                           | Flores, H.; Freeman, J.                                                                                                                                                                                                                                                                                                                                                                                                                                                                             |
| EPI_ISL_418267                                                                                                                                                                                                                                                                                                                                                                                                                                                           | Microbiology and immunology department, Pasteur institute in Ho Chi Minh city                            | Microbiology and Immunology department, Pasteur institute in Ho Chi Minh city                                                                                                  | A.H.; C.Q.; Cao; D.T.; Dao; H.Q.; H.T.; H.T.T.; Hoang; Huynh; K.C.; L.T.; L.T.K.; Le; Luong; M.H.; N.P.H.; N.T.; Nguyen; Pham; Phung; Q.C.; Q.D.; S.N.; T.M.; T.N.A.; T.T.; T.T.N.; T.V.; T.V. and Phan; Tran; Tran, T.; Vo; Vu                                                                                                                                                                                                                                                                     |
| EPI_ISL_3261842, EPI_ISL_3261849, EPI_ISL_3261862                                                                                                                                                                                                                                                                                                                                                                                                                        | Microbiology laboratory, National Center for Global Health and Medicine Hospital                         | Pathogen Genomics Center, National Institute of Infectious Diseases                                                                                                            | Harutaka Katano; Kentaro Itokawa; Makoto Kuroda; Masanori Hashino; Norio Ohmagari; Rina Tanaka; Shinji Saito; Shun Iida; Tadaki Suzuki; Tsuyoshi Sekizuka; Yuichiro Hirata                                                                                                                                                                                                                                                                                                                          |
| EPI_ISL_1299785                                                                                                                                                                                                                                                                                                                                                                                                                                                          | Microbiology, Department of Pathology, St. Bernard's Hospital, Gibraltar Health Authority                | Respiratory Virus Unit, National Infection Service, Public Health England                                                                                                      | Charlotte Gillborn-Jones (Gibraltar); Dr Nicholas Cortes (Gibraltar); PHE Covid Sequencing Team                                                                                                                                                                                                                                                                                                                                                                                                     |
| EPI_ISL_434571                                                                                                                                                                                                                                                                                                                                                                                                                                                           | Microbiology, The University of Hong Kong                                                                | Microbiology, The University of Hong Kong                                                                                                                                      | Chan; J.F.W. and Yuen; K.-Y.                                                                                                                                                                                                                                                                                                                                                                                                                                                                        |
| EPI_ISL_6471782, EPI_ISL_6471855                                                                                                                                                                                                                                                                                                                                                                                                                                         | Mikrobiologie FNOL                                                                                       | Institute of Molecular and Translational Medicine / Laboratory of Experimental Medicine, Faculty of Medicine and Dentistry, Palacky University                                 | Barbora Blumová; Hana Jaworek; Kateřina Kubáňová; Marián Hajdúch; Rastislav Slavkovský; Vladimíra Koudeláková                                                                                                                                                                                                                                                                                                                                                                                       |
| EPI_ISL_1318206                                                                                                                                                                                                                                                                                                                                                                                                                                                          | Ministry of Health Hospitals                                                                             | Institute of Health and Community Medicine                                                                                                                                     | Chan Chia Jui; Chua Hock Hin; David Perera; Ooi Mong How; Tonnie Sia Loong Loong; Wong Jyn Shan; Wong Kiing Aik                                                                                                                                                                                                                                                                                                                                                                                     |
| EPI_ISL_437304, EPI_ISL_1096067, EPI_ISL_1096107, EPI_ISL_1167647, EPI_ISL_1211636, EPI_ISL_1278207, EPI_ISL_1293295, EPI_ISL_1302723, EPI_ISL_1403710, EPI_ISL_1620482, EPI_ISL_1678524, EPI_ISL_1678554, EPI_ISL_1760132, EPI_ISL_1911755, EPI_ISL_1922091, EPI_ISL_2968340, EPI_ISL_2968507, EPI_ISL_2968513, EPI_ISL_3256453, EPI_ISL_3256586, EPI_ISL_3256608, EPI_ISL_3256635, EPI_ISL_3256763, EPI_ISL_3256963, EPI_ISL_3256979, EPI_ISL_3257149, EPI_ISL_3257178 | Ministry of Health Turkey                                                                                | Ministry of Health Turkey                                                                                                                                                      | Fatma Bayraktar; Gulay Korukluoglu; Gulay Korukluoglu; Selcuk Kiliç; Suleyman Yalcin; Süleyman Yalcin; Süleyman Yalçın; Tülin Demir; Yasemin Cosgun; Yasemin Cosgun                                                                                                                                                                                                                                                                                                                                 |
| EPI_ISL_1712664                                                                                                                                                                                                                                                                                                                                                                                                                                                          | Ministry of Public Health / Hamad Medical Corporation                                                    | Biomedical Research Center (BRC), Qatar University / Qatar Genome Project (QGP)                                                                                                | Asmaa A. Al-Thani, MOPH and HMC; Abdullatif Al-Khal; BRC; Fatiha M. Benslimane; Chadi Saad; Dana Al-Batesh; Dina Elgakhlab QGP; Fatima H. Al-Kuwari; Einas A. E. Al-Kuwari; Hadi M. Yassine; Hamad E. Al-Romaihi; Hamda Alromaihi; Heba A. Al-Khatib; Mashaal A. Al-Bader; Mohammed Al-Thani; Muna A. S. Al-Maslamani; Oai Al-Jamal; Peter V. Coyle; Reham A. El-Kahlout. QBB; Tasneem Al-Hamad; Roberto Bertolini; Salih Al-Marri                                                                  |
| EPI_ISL_1714036, EPI_ISL_1714173, EPI_ISL_1714369, EPI_ISL_1714466, EPI_ISL_1714483, EPI_ISL_1714517                                                                                                                                                                                                                                                                                                                                                                     | Ministry of Public Health / Hamad Medical Corporation                                                    | Weill Cornell Medical College - Qatar (WCM-Q), Genomics Core Laboratory / Qatar Genome Project (QGP)                                                                           | Chadi Saad MOPH and HMC; Abdullatif Al-Khal; Dina Elgakhlab; Einas A. E. Al-Kuwari; Hamad E. Al-Romaihi; Hamda Alromaihi; Joel A Malek. QGP; Fatima H. Al-Kuwari; Laith Abu-Raddad; Mashaal A. Al-Bader; Meryem Bensaad; Mohammed Al-Thani; Muna A. S. Al-Maslamani; Peter V. Coyle; Reham A. El-Kahlout. QBB; Tasneem Al-Hamad; Roberto Bertolini; Salih Al-Marri; Shameem Younusunjun; WCMQ; Ayeda A. Ahmed; Yasmin Mohamoud                                                                      |
| EPI_ISL_414589, EPI_ISL_417191, EPI_ISL_417196, EPI_ISL_417470, EPI_ISL_417471, EPI_ISL_417472, EPI_ISL_417474, EPI_ISL_417477, EPI_ISL_417478, EPI_ISL_417479, EPI_ISL_417480, EPI_ISL_417492, EPI_ISL_417493, EPI_ISL_417496, EPI_ISL_417499, EPI_ISL_417501, EPI_ISL_1531628, EPI_ISL_1711005, EPI_ISL_1759751, EPI_ISL_3216688                                                                                                                                       | see above                                                                                                | Minnesota Department of Health, Public Health Laboratory                                                                                                                       | Alexandra Lorentz; Jacob Garfin; Jake Garfin and Xiong Wang; Matt Plumb; and Xiong Wang                                                                                                                                                                                                                                                                                                                                                                                                             |
| EPI_ISL_1362618, EPI_ISL_3235469                                                                                                                                                                                                                                                                                                                                                                                                                                         | Missouri State Public Health Laboratory                                                                  | Missouri State Public Health Laboratory                                                                                                                                        | Ashley New; Joshua Barry; Matthew Sinn                                                                                                                                                                                                                                                                                                                                                                                                                                                              |
| EPI_ISL_3207526, EPI_ISL_2009446, EPI_ISL_2011702                                                                                                                                                                                                                                                                                                                                                                                                                        | Mitchells Plain Hospital wc MPH<br>Moderna Inc.                                                          | NHLS/UCT<br>Moderna Inc.                                                                                                                                                       | Arash Iranzadeh; Bruna Galvão; Carolyn Williamson; Deelan Doolabh; Diana Hardie; Gert Marais; Innocent Mudau; Lynn Tyers; Marvin Hsiao; Rageema Joseph; Stephen Korsman<br>Groves Dixon; Rolando Pajon; Yamuna Paila                                                                                                                                                                                                                                                                                |
| EPI_ISL_6564974                                                                                                                                                                                                                                                                                                                                                                                                                                                          | Molecular Biology Lab, Suceava County Emergency Hospital                                                 | "Stefan cel Mare" University Metagenomics Lab                                                                                                                                  | Gheorghita Puscaselu Roxana; Lobiuc Andrei                                                                                                                                                                                                                                                                                                                                                                                                                                                          |
| EPI_ISL_2101095, EPI_ISL_2101152, EPI_ISL_2101157                                                                                                                                                                                                                                                                                                                                                                                                                        | Molecular Biology Laboratory, Faculty Medicine and Health Sciences, Warmadewa University                 | Eijkman Institute for Molecular Biology, National Agency for Research and Innovation; Molecular Biology Laboratory, Faculty Medicine and Health Sciences, Warmadewa University | Amin Soebandrio; Edison Johar; Eryl Sintya; Frilasita A Yudhaputri; Hidayat Trimarsanto; Iskandar Adnan; Khin Saw Myint; Lidwina Priliani; Lydia V. Panggalo; Muhammad Rezki Rasyak; Safarina G Malik; Sri Masyeni; Sukma Oktavianthi; Willy Agustine                                                                                                                                                                                                                                               |
| EPI_ISL_460094                                                                                                                                                                                                                                                                                                                                                                                                                                                           | Molecular Virology Unit, Fondazione IRCCS Policlinico San Matteo , Pavia                                 | Laboratory of Virology, INMI Lazzaro Spallanzani IRCCS                                                                                                                         | Antonino Di Caro; Antonio Piralla; Barbara Bartolini; Cesare E.M. Gruber; Fausto Baldanti; Maria R. Capobianchi; Martina Rueca                                                                                                                                                                                                                                                                                                                                                                      |
| EPI_ISL_1860625, EPI_ISL_1871394, EPI_ISL_1871906, EPI_ISL_1877492, EPI_ISL_1878081, EPI_ISL_1885417, EPI_ISL_1891607                                                                                                                                                                                                                                                                                                                                                    | see above                                                                                                | Aalborg University                                                                                                                                                             | Danish Covid-19 Genome Consortium                                                                                                                                                                                                                                                                                                                                                                                                                                                                   |
| EPI_ISL_3246823, EPI_ISL_3268203                                                                                                                                                                                                                                                                                                                                                                                                                                         | Montana Public Health Laboratory                                                                         | Montana Public Health Laboratory                                                                                                                                               | Carrie Biskupiak; Deborah Gibson; Joy Ritter; Michael Dills; Michelle Mozer                                                                                                                                                                                                                                                                                                                                                                                                                         |
| EPI_ISL_5021502, EPI_ISL_5021591                                                                                                                                                                                                                                                                                                                                                                                                                                         | Murni Teguh Memorial Hospital                                                                            | Eijkman Research Center for Molecular Biology, National Research and Innovation Agency; Microbiology Laboratory, Faculty of Medicine, University of Sumatera Utara             | Amin Soebandrio; Edison Johar; Frilasita A Yudhaputri; Hidayat Trimarsanto; Inke Nadia Diniyanti Lubis; Iskandar Adnan; Jessica R Saragih; Khin Saw Myint; Lidwina Priliani; Lydia V Panggalo; Muhammad Rezki Rasyak; Mutiara; R Lia Kusumawati; Safarina G Malik; Sahat Halim; Sukma Oktavianthi; Tryna Tania; Willy Agustine                                                                                                                                                                      |
| EPI_ISL_3208071                                                                                                                                                                                                                                                                                                                                                                                                                                                          | Murni Teguh Memorial Hospital                                                                            | Genomik Solidaritas Indonesia Laboratorum                                                                                                                                      | Annisa Muthiah Sukirman; Anuraj Shankar; Ariel Pradipta; Carissa Sintca Wijaya; Gracia Felias Enos Korompis; Inke Nadia Diniyanti Lubis; Lia Kusumawati; Meutia Ayuputeri Kumaheri; Mutiara; Reinhart Gabriel; Ririe Fachrina Malisie; Tryna Tania; Vania Gavrila Wikasa                                                                                                                                                                                                                            |
| EPI_ISL_2391485                                                                                                                                                                                                                                                                                                                                                                                                                                                          | N.H.L Municipal Medical College, Ahmedabad                                                               | Gujarat Biotechnology Research Centre                                                                                                                                          | Chaitanya Joshi; Dinesh Kumar; Janvi Raval; Jayshri Pethani; Madhvi Joshi; Nitesh Shah; Nitin Savaliya; Ramesh Pandit; Sonal Sharma; Twinkle Soni; Umang Mishra; Zarna Patel; Zuber Saiyed                                                                                                                                                                                                                                                                                                          |
| EPI_ISL_1272257, EPI_ISL_1588154, EPI_ISL_1588252                                                                                                                                                                                                                                                                                                                                                                                                                        | NB-Hôpital Georges L. Dumont                                                                             | National Microbiology Laboratory (NML)                                                                                                                                         | Anna Majer; Anneliese Landgraff; CanCOGeN's metadata curation team; Darian Hole; Elsie Grudeski; Gary Van Domselaar; Grace Seo; Guillaume Desnoyers; Jennifer Tanner; Kirsten Biggar; Madison Chapel; Morag Graham; Natalie Knox; Nathalie Bastien; Philip Mabon; Public Health Agency of Canada CanCOGeN team; Rhiannon Huzarewicz; Richard Garceau; Russell Mandes; Shari Tyson; Timothy Booth; Yan Li                                                                                            |
| EPI_ISL_1446921, EPI_ISL_1823900                                                                                                                                                                                                                                                                                                                                                                                                                                         | NC State Laboratory of Public Health                                                                     | Centers for Disease Control and Prevention Division of Viral Diseases, Pathogen Discovery                                                                                      | Alison Laufer Halpin; Ben L. Rambo-Martin; Clinton R. Paden; Dakota Howard; Darlene Wagner; Dave Wentworth; Dhvani Batra; Jasmine Padilla; Justin Lee; Katie Dillon; Krista Queen; Kristen Knipe; Kristine Lacek; Mark Burroughs; Matthew Schmerer; Mili Sheth; Peter Cook; Sam Shepard; Sarah Nobles; Shoshona Le; Suxiang Tong; Vivien Dugan; Yvette Unoarumhi                                                                                                                                    |
| EPI_ISL_1734158, EPI_ISL_3255045                                                                                                                                                                                                                                                                                                                                                                                                                                         | NCSLPH                                                                                                   | NCSLPH                                                                                                                                                                         | Chase K; Glover W; Greene S; Miller MC                                                                                                                                                                                                                                                                                                                                                                                                                                                              |
| EPI_ISL_3241920                                                                                                                                                                                                                                                                                                                                                                                                                                                          | NE Public Health Laboratory                                                                              | Centers for Disease Control and Prevention Division of Viral Diseases, Pathogen Discovery                                                                                      | Alex Burgin; Ben L. Rambo-Martin; Clinton R. Paden; Dakota Howard; Dave Wentworth; Dhvani Batra; Jasmine Padilla; Justin Lee; Krista Queen; Kristen Knipe; Kristine Lacek; Mark Burroughs; Matthew Schmerer; Meghan Bentz; Mili Sheth; Peter Cook; Sam Shepard; Sarah Nobles; Suxiang Tong; Vivien Dugan; Yvette Unoarumhi                                                                                                                                                                          |
| EPI_ISL_3261906                                                                                                                                                                                                                                                                                                                                                                                                                                                          | NHLS Port Elizabeth Laboratory                                                                           | KRISP, KZN Research Innovation and Sequencing Platform                                                                                                                         | Giandhari Jennifer; Naidoo Yeshee; Pillay Sureshnee; San James; Tegally Houriyah; Tshabuila Derek; Wilkinson Eduan; Yajna Ramphal; de Oliveira Tulio                                                                                                                                                                                                                                                                                                                                                |
| EPI_ISL_3261867                                                                                                                                                                                                                                                                                                                                                                                                                                                          | NHLS_VIRO                                                                                                | KRISP, KZN Research Innovation and Sequencing Platform                                                                                                                         | Giandhari Jennifer; Naidoo Yeshee; Pillay Sureshnee; San James; Tegally Houriyah; Tshabuila Derek; Wilkinson Eduan; Yajna Ramphal; de Oliveira Tulio                                                                                                                                                                                                                                                                                                                                                |
| EPI_ISL_3275356, EPI_ISL_3275367                                                                                                                                                                                                                                                                                                                                                                                                                                         | NHLS_VIRO Eastern Cape                                                                                   | KRISP, KZN Research Innovation and Sequencing Platform                                                                                                                         | Giandhari Jennifer; Laguda-Akingba O; Naidoo Yeshee; Pillay Sureshnee; San James; Tegally Houriyah; Tshabuila Derek; Wilkinson Eduan; Yajna Ramphal; de Oliveira Tulio                                                                                                                                                                                                                                                                                                                              |
| EPI_ISL_531504                                                                                                                                                                                                                                                                                                                                                                                                                                                           | NHSGGC West of Scotland Specialist Virology Centre / MRC-University of Glasgow Centre for Virus Research | Wellcome Sanger Institute for the COVID-19 Genomics UK                                                                                                                         | Alasdair MacLean; Alice Broos; Ana da Silva Filipe; Antonia Ho; Cordelia Langford; Daniel Mair; David K. Jackson; David L Robertson; Dominic Kwiatkowski; Elihu Aranday-Cortes; Emma Thomson and Alex Alderton; Ewan Harrison; Ian Johnston; James Shepherd; Jenna Nichols; John Sillitoe; Joseph Hughes; Kathy Li; Kathy Smollett; Kirstyn Brunker; Kyriaki Nomikou; Lily Tong; Marc Niebel; Natasha Jesudason; Natasha Johnson; Patawee Asamaphan; Rajiv Shah; Richard Orton; Roberto Amato; Rory |

|                                                                                                                                                                                                                                                                                                                                                                                                                                                                                                                                                                                                                                                                                                                                                                                                                                                                                                                                                                                                                                                                                                                                                                                                                                                                                                                                                                                                                                                                                                                                                                                                                                                                                                                                                                                                                                                                                                                                                                                                                                                                                                                                                                                                                                                                                                                                                                                                       |                                                                                                                 |                                                                                                  |                                                                                                                                                                                                                                                                                                                                                                                                                                                                                                                                                                                                                                                                          |
|-------------------------------------------------------------------------------------------------------------------------------------------------------------------------------------------------------------------------------------------------------------------------------------------------------------------------------------------------------------------------------------------------------------------------------------------------------------------------------------------------------------------------------------------------------------------------------------------------------------------------------------------------------------------------------------------------------------------------------------------------------------------------------------------------------------------------------------------------------------------------------------------------------------------------------------------------------------------------------------------------------------------------------------------------------------------------------------------------------------------------------------------------------------------------------------------------------------------------------------------------------------------------------------------------------------------------------------------------------------------------------------------------------------------------------------------------------------------------------------------------------------------------------------------------------------------------------------------------------------------------------------------------------------------------------------------------------------------------------------------------------------------------------------------------------------------------------------------------------------------------------------------------------------------------------------------------------------------------------------------------------------------------------------------------------------------------------------------------------------------------------------------------------------------------------------------------------------------------------------------------------------------------------------------------------------------------------------------------------------------------------------------------------|-----------------------------------------------------------------------------------------------------------------|--------------------------------------------------------------------------------------------------|--------------------------------------------------------------------------------------------------------------------------------------------------------------------------------------------------------------------------------------------------------------------------------------------------------------------------------------------------------------------------------------------------------------------------------------------------------------------------------------------------------------------------------------------------------------------------------------------------------------------------------------------------------------------------|
| EPI_ISL_479536                                                                                                                                                                                                                                                                                                                                                                                                                                                                                                                                                                                                                                                                                                                                                                                                                                                                                                                                                                                                                                                                                                                                                                                                                                                                                                                                                                                                                                                                                                                                                                                                                                                                                                                                                                                                                                                                                                                                                                                                                                                                                                                                                                                                                                                                                                                                                                                        | NIV Influenza                                                                                                   | (COG-UK) consortium                                                                              | Gunson; Sarah McDonald; Sonia Goncalves; Sreenu Vattipally; Stephen Carmichael; Yasmin Parr                                                                                                                                                                                                                                                                                                                                                                                                                                                                                                                                                                              |
| EPI_ISL_2787854                                                                                                                                                                                                                                                                                                                                                                                                                                                                                                                                                                                                                                                                                                                                                                                                                                                                                                                                                                                                                                                                                                                                                                                                                                                                                                                                                                                                                                                                                                                                                                                                                                                                                                                                                                                                                                                                                                                                                                                                                                                                                                                                                                                                                                                                                                                                                                                       | NJ Public Health and Environmental Laboratories                                                                 | NIV Influenza                                                                                    | NIV; Potdar; Pune; Varsha on behalf of National Influenza Centre                                                                                                                                                                                                                                                                                                                                                                                                                                                                                                                                                                                                         |
| EPI_ISL_3232157                                                                                                                                                                                                                                                                                                                                                                                                                                                                                                                                                                                                                                                                                                                                                                                                                                                                                                                                                                                                                                                                                                                                                                                                                                                                                                                                                                                                                                                                                                                                                                                                                                                                                                                                                                                                                                                                                                                                                                                                                                                                                                                                                                                                                                                                                                                                                                                       | NJDOH, Public Health and Environmental Laboratories                                                             | Centers for Disease Control and Prevention Division of Viral Diseases, Pathogen Discovery        | Allison Roder; Byeong Jeong; Chelsea San Filippo; Dana Woell; Jacquelyn Deverell; Lindsey Bodnar; Ryan Pachucki; Shiv K. Verma                                                                                                                                                                                                                                                                                                                                                                                                                                                                                                                                           |
| EPI_ISL_3150971                                                                                                                                                                                                                                                                                                                                                                                                                                                                                                                                                                                                                                                                                                                                                                                                                                                                                                                                                                                                                                                                                                                                                                                                                                                                                                                                                                                                                                                                                                                                                                                                                                                                                                                                                                                                                                                                                                                                                                                                                                                                                                                                                                                                                                                                                                                                                                                       | NL-Dr. Leonard A. Miller Centre for Health Services                                                             | NJ, PHEH                                                                                         | Anna Majer; Anneliese Landgraff; CanCOGE's metadata curation team; Darian Hole; Elsie Grudeski; Gary Van Domselaar; George Zahariadis; Grace Seo; Jennifer Tanner; Kerri Smith; Kirsten Biggar; Laura Gilbert; Madison Chapel; Morag Graham; Natalie Knox; Nathalie Bastien; Philip Mabon; Public Health Agency of Canada CanCOGE team; Rhiannon Huzarewicz; Robert Needle; Russell Mandes; Shari Tyson; Timothy Booth; Yan Li; Yang Yu                                                                                                                                                                                                                                  |
| EPI_ISL_4061039, EPI_ISL_5014610, EPI_ISL_5923941, EPI_ISL_6368493                                                                                                                                                                                                                                                                                                                                                                                                                                                                                                                                                                                                                                                                                                                                                                                                                                                                                                                                                                                                                                                                                                                                                                                                                                                                                                                                                                                                                                                                                                                                                                                                                                                                                                                                                                                                                                                                                                                                                                                                                                                                                                                                                                                                                                                                                                                                    | NL-Dr. Leonard A. Miller Centre for Health Services                                                             | National Microbiology Laboratory (NML)                                                           | Adel Malek; Anna Majer; Anneliese Landgraff; CanCOGE's metadata curation team; Christopher Corkum; Darian Hole; Elsie Grudeski; Gary Van Domselaar; George Zahariadis; George Zahariadis; Grace Seo; Jennifer Tanner; Kirsten Biggar; Laura Gilbert; Madison Chapel; Morag Graham; Natalie Knox; Nathalie Bastien; Philip Mabon; Phillip Andrews; Public Health Agency of Canada CanCOGE team; Rhiannon Huzarewicz; Robert Needle; Russell Mandes; Shari Tyson; Timothy Booth; Yan Li; Yang Yu                                                                                                                                                                           |
| EPI_ISL_1540658, EPI_ISL_1540677                                                                                                                                                                                                                                                                                                                                                                                                                                                                                                                                                                                                                                                                                                                                                                                                                                                                                                                                                                                                                                                                                                                                                                                                                                                                                                                                                                                                                                                                                                                                                                                                                                                                                                                                                                                                                                                                                                                                                                                                                                                                                                                                                                                                                                                                                                                                                                      | NMVRVI                                                                                                          | Newfoundland and Labrador - Eastern Health                                                       | Astra Vitkauskienė; Darius Cereskevicius; Inga Nasvytiene; Mantas Sarauskas; Marius Sukys; Rasa Ugenskiene; Renaldas Jurkevicius; Rima Vainoriene; Zivile Zemeckiene                                                                                                                                                                                                                                                                                                                                                                                                                                                                                                     |
| see above                                                                                                                                                                                                                                                                                                                                                                                                                                                                                                                                                                                                                                                                                                                                                                                                                                                                                                                                                                                                                                                                                                                                                                                                                                                                                                                                                                                                                                                                                                                                                                                                                                                                                                                                                                                                                                                                                                                                                                                                                                                                                                                                                                                                                                                                                                                                                                                             | NMVRVI                                                                                                          | Lithuanian University of Health Sciences Hospital, Department of Genetics and Molecular Medicine | Ana Steponkiene; Arnoldas Pautienius; Astra Vitkauskienė; Danas Baksa; Dovydas Gecys; Ingrida Olen draite; Jelena Razmuk; Kamile Tamusauskaite; Laura Pareckaite; Lukas Vasionis; Lukas Zemaitis; Migle Gabrielaite; Svajune Muralyte; Vaiva Lesauskaite                                                                                                                                                                                                                                                                                                                                                                                                                 |
| EPI_ISL_1397407                                                                                                                                                                                                                                                                                                                                                                                                                                                                                                                                                                                                                                                                                                                                                                                                                                                                                                                                                                                                                                                                                                                                                                                                                                                                                                                                                                                                                                                                                                                                                                                                                                                                                                                                                                                                                                                                                                                                                                                                                                                                                                                                                                                                                                                                                                                                                                                       | NORTH SHORE UNIVERSITY HOSPITAL                                                                                 | National Public Health Surveillance Laboratory                                                   | Alexis Russel; Daryl M. Lamson; Erasmus Schneider; Erica Lasek-Nesselquist; John Kelly; Jonathan Pitnick; Kirsten St. George; Matthew Shudt; Melissa A Leisner; Navjot Singh                                                                                                                                                                                                                                                                                                                                                                                                                                                                                             |
| EPI_ISL_3235691, EPI_ISL_3235698                                                                                                                                                                                                                                                                                                                                                                                                                                                                                                                                                                                                                                                                                                                                                                                                                                                                                                                                                                                                                                                                                                                                                                                                                                                                                                                                                                                                                                                                                                                                                                                                                                                                                                                                                                                                                                                                                                                                                                                                                                                                                                                                                                                                                                                                                                                                                                      | NORTHWELL HEALTH LABORATORIES                                                                                   | Wadsworth Center, New York State Department of Health                                            | Alexis Russell; Catharine Prussing; Daryl M. Lamson; Erasmus Schneider; Erica Lasek-Nesselquist; John Kelly; Jonathan Pitnick; Kirsten St. George; Matthew Shudt; Melissa A Leisner; Navjot Singh                                                                                                                                                                                                                                                                                                                                                                                                                                                                        |
| EPI_ISL_416743                                                                                                                                                                                                                                                                                                                                                                                                                                                                                                                                                                                                                                                                                                                                                                                                                                                                                                                                                                                                                                                                                                                                                                                                                                                                                                                                                                                                                                                                                                                                                                                                                                                                                                                                                                                                                                                                                                                                                                                                                                                                                                                                                                                                                                                                                                                                                                                        | NRL for Influenza, Centrum Epidemiology and Microbiology of National Institute of Public Health, Czech Republic | Wadsworth Center, New York State Department of Health                                            | Akexander Nagy; Barbara Muehleemann; Christian Drosten; Dusan Trnka; Helena Jirincova; Jaromira Vecerova; Jörn Beheim-Schwarzbach; Julia Schneider; Ludmila Novakova; Talitha Veith; Terry Jones; Victor M Corman                                                                                                                                                                                                                                                                                                                                                                                                                                                        |
| EPI_ISL_489106                                                                                                                                                                                                                                                                                                                                                                                                                                                                                                                                                                                                                                                                                                                                                                                                                                                                                                                                                                                                                                                                                                                                                                                                                                                                                                                                                                                                                                                                                                                                                                                                                                                                                                                                                                                                                                                                                                                                                                                                                                                                                                                                                                                                                                                                                                                                                                                        | NU-OMICS DNA Sequencing research facility, Northumbria University                                               | Charite Universitaetsmedizin Berlin, Institute of Virology                                       | Andrew Nelson; Brendan Payne; Chris Duncan; Clive Graham; Cordelia Langford; Darren Smith and Alex Alderton; David K. Jackson; Debra Padgett; Dominic Kwiatkowski; Edward Barton; Emma Swindells; Ewan Harrison; Garren Scott; Gary Black; Gary Eltringham; Greg Young; Ian Johnston; Jane Greenaway; Jennifer Collins; John Allan; John Sillitoe on behalf of the Wellcome Sanger Institute COVID-19 Surveillance Team (http://www.sanger.ac.uk/covid-team); Joshua Lynn; Lynn Dover; Matthew Bashton; Paul Baker; Roberto Amato; Sarah Essex; Shea Waugh; Shirelle Burton-Fanning; Sonia Goncalves; Steve Liggett; Wen Yew; Yursi Taha                                 |
| EPI_ISL_1656849, EPI_ISL_1657252, EPI_ISL_1657308, EPI_ISL_1659545                                                                                                                                                                                                                                                                                                                                                                                                                                                                                                                                                                                                                                                                                                                                                                                                                                                                                                                                                                                                                                                                                                                                                                                                                                                                                                                                                                                                                                                                                                                                                                                                                                                                                                                                                                                                                                                                                                                                                                                                                                                                                                                                                                                                                                                                                                                                    | NVSP                                                                                                            | National Public Health Surveillance Laboratory                                                   | Ana Steponkiene; Arnoldas Pautienius; Astra Vitkauskienė; Danas Baksa; Dovydas Gecys; Ingrida Olen draite; Jelena Razmuk; Kamile Tamusauskaite; Laura Pareckaite; Lukas Vasionis; Lukas Zemaitis; Migle Gabrielaite; Svajune Muralyte; Vaiva Lesauskaite                                                                                                                                                                                                                                                                                                                                                                                                                 |
| EPI_ISL_1227197, EPI_ISL_1854700                                                                                                                                                                                                                                                                                                                                                                                                                                                                                                                                                                                                                                                                                                                                                                                                                                                                                                                                                                                                                                                                                                                                                                                                                                                                                                                                                                                                                                                                                                                                                                                                                                                                                                                                                                                                                                                                                                                                                                                                                                                                                                                                                                                                                                                                                                                                                                      | NYC Pandemic Response Lab                                                                                       | Wadsworth Center, New York State Department of Health                                            | Alexis Russel; Alexis Russell; Catharine Prussing; Daryl M. Lamson; Erasmus Schneider; Erica Lasek-Nesselquist; John Kelly; Jonathan Pitnick; Kirsten St. George; Matthew Shudt; Melissa A Leisner; Navjot Singh                                                                                                                                                                                                                                                                                                                                                                                                                                                         |
| see above                                                                                                                                                                                                                                                                                                                                                                                                                                                                                                                                                                                                                                                                                                                                                                                                                                                                                                                                                                                                                                                                                                                                                                                                                                                                                                                                                                                                                                                                                                                                                                                                                                                                                                                                                                                                                                                                                                                                                                                                                                                                                                                                                                                                                                                                                                                                                                                             | NYU Langone Health                                                                                              | Department of Pathology and Medicine, New York University School of Medicine                     | Adriana Heguy; Amy Rapkiewicz; Antonio Serrano; Christian Marier; Dacia Dimitrino; Emily Huang; Gael Westby; George Jour; Guomiao Shen; Jared Pinnell; John Cadley; John Chen; Margaret Black; Maria Aguiro-Rosenfeld; Marie Samanovic-Golden; Mark J. Mulligan; Mark Mulligan; Matija Snuderl; Matt Mauro; Matthew T. Maurano; Megan Hogan; Nick Vulpesco; Paolo Cotzia; Paul Zappile; Peter Meyn; Raquel Ordonez Ciriza; Raven Luther; Sitharam Ramaswami; Tatiana Gindin; Theodore Vougiouklakis; Vanessa Raabe; Xiaojun Feng; Yutong Zhang                                                                                                                           |
| EPI_ISL_444669, EPI_ISL_1654594, EPI_ISL_2161705, EPI_ISL_2161762, EPI_ISL_3245488, EPI_ISL_3245530, EPI_ISL_3245660                                                                                                                                                                                                                                                                                                                                                                                                                                                                                                                                                                                                                                                                                                                                                                                                                                                                                                                                                                                                                                                                                                                                                                                                                                                                                                                                                                                                                                                                                                                                                                                                                                                                                                                                                                                                                                                                                                                                                                                                                                                                                                                                                                                                                                                                                  | NYU Langone Health                                                                                              | Departments of Pathology and Medicine, New York University School of Medicine                    | Adriana Heguy; Alireza Khodadadi-Jamarray; Amy Rapkiewicz; Andre M. Ribeiro-Jos-Santos; Andrew Lytle; Antonio Serrano; Brendan Belovaras; Christian Marier; Dacia Dimitrino; Emily Huang; Gael Westby; George Jour; Guigang Wang; Guomiao Shen; Iman Osman; Jared Pinnell; John Cadley; John Chen; Lawrence H. Lin; Ludovic Boyard; Margaret Black; Maria Aguiro-Rosenfeld; Marie Samanovic-Golden; Mark J. Mulligan; Matija Snuderl; Matthew T. Maurano; Megan Hogan; Nick Vulpesco; Paolo Cotzia; Paul Zappile; Peter Meyn; Raquel Ordonez Ciriza; Raven Luther; Sitharam Ramaswami; Tatiana Gindin; Theodore Vougiouklakis; Vanessa Raabe; Xiaojun Feng; Yutong Zhang |
| EPI_ISL_1960528                                                                                                                                                                                                                                                                                                                                                                                                                                                                                                                                                                                                                                                                                                                                                                                                                                                                                                                                                                                                                                                                                                                                                                                                                                                                                                                                                                                                                                                                                                                                                                                                                                                                                                                                                                                                                                                                                                                                                                                                                                                                                                                                                                                                                                                                                                                                                                                       | Nacionálne visuomenes sveikatos prieziuros laboratorija                                                         | National Public Health Surveillance Laboratory                                                   | Ana Steponkiene; Danas Baksa; Jelena Razmuk; Lukas Vasionis; Lukas Zemaitis; Migle Gabrielaite; Svajune Muralyte                                                                                                                                                                                                                                                                                                                                                                                                                                                                                                                                                         |
| EPI_ISL_1960250, EPI_ISL_1960377, EPI_ISL_1960401, EPI_ISL_1960407, EPI_ISL_2082061, EPI_ISL_2082240, EPI_ISL_2082325, EPI_ISL_2334501                                                                                                                                                                                                                                                                                                                                                                                                                                                                                                                                                                                                                                                                                                                                                                                                                                                                                                                                                                                                                                                                                                                                                                                                                                                                                                                                                                                                                                                                                                                                                                                                                                                                                                                                                                                                                                                                                                                                                                                                                                                                                                                                                                                                                                                                | Nacionalinis maisto ir veterinarijos rizikos vertinimo institutas                                               | National Public Health Surveillance Laboratory                                                   | Ana Steponkiene; Danas Baksa; Jelena Razmuk; Lukas Vasionis; Lukas Zemaitis; Migle Gabrielaite; Svajune Muralyte                                                                                                                                                                                                                                                                                                                                                                                                                                                                                                                                                         |
| EPI_ISL_862844                                                                                                                                                                                                                                                                                                                                                                                                                                                                                                                                                                                                                                                                                                                                                                                                                                                                                                                                                                                                                                                                                                                                                                                                                                                                                                                                                                                                                                                                                                                                                                                                                                                                                                                                                                                                                                                                                                                                                                                                                                                                                                                                                                                                                                                                                                                                                                                        | Nara Medical University Hospital                                                                                | Fujita health University, School of Medicine, Department of Microbiology                         | Masahiro Suzuki; Yohei Doi                                                                                                                                                                                                                                                                                                                                                                                                                                                                                                                                                                                                                                               |
| EPI_ISL_3191353, EPI_ISL_3191380                                                                                                                                                                                                                                                                                                                                                                                                                                                                                                                                                                                                                                                                                                                                                                                                                                                                                                                                                                                                                                                                                                                                                                                                                                                                                                                                                                                                                                                                                                                                                                                                                                                                                                                                                                                                                                                                                                                                                                                                                                                                                                                                                                                                                                                                                                                                                                      | Nara Prefecture Institute of Health                                                                             | Nara Prefecture Institute of Health                                                              | Iori Minami; Kentaro Itokawa; Makoto Kuroda; Mamoru Nakano; Masaki Yoneda; Masanori Hashino; Rina Tanaka; Seiko Yamazaki; Shoko Chiba; Tsuyoshi Sekizuka; Yuki Matsuura                                                                                                                                                                                                                                                                                                                                                                                                                                                                                                  |
| EPI_ISL_4508259                                                                                                                                                                                                                                                                                                                                                                                                                                                                                                                                                                                                                                                                                                                                                                                                                                                                                                                                                                                                                                                                                                                                                                                                                                                                                                                                                                                                                                                                                                                                                                                                                                                                                                                                                                                                                                                                                                                                                                                                                                                                                                                                                                                                                                                                                                                                                                                       | Naraya Medical Center, Bekasi                                                                                   | National Institute of Health Research and Development                                            | Arie Ardiansyah Nugraha; Fajar Nur; Hana Apsari Pawestri; Hartanti Dian Ikawati; Kartika Dewi Puspa; Krisna Pangesti; Nelly Puspandari; Subangkit; Sulistiyohadi; Triyani Soekarso; Vivi Setiawaty                                                                                                                                                                                                                                                                                                                                                                                                                                                                       |
| EPI_ISL_7310138                                                                                                                                                                                                                                                                                                                                                                                                                                                                                                                                                                                                                                                                                                                                                                                                                                                                                                                                                                                                                                                                                                                                                                                                                                                                                                                                                                                                                                                                                                                                                                                                                                                                                                                                                                                                                                                                                                                                                                                                                                                                                                                                                                                                                                                                                                                                                                                       | Nastavni zavod za javno zdravstvo Splitsko- Dalmatinske županije                                                | Hrvatski zavod za javno zdravstvo                                                                | Anita Jurić; Dragan Jurić; Irena Tabain; Ivana Ferenčak; Josipa Kuzle; Ljiljana Žmak; Mihaela Brovack                                                                                                                                                                                                                                                                                                                                                                                                                                                                                                                                                                    |
| EPI_ISL_1233537                                                                                                                                                                                                                                                                                                                                                                                                                                                                                                                                                                                                                                                                                                                                                                                                                                                                                                                                                                                                                                                                                                                                                                                                                                                                                                                                                                                                                                                                                                                                                                                                                                                                                                                                                                                                                                                                                                                                                                                                                                                                                                                                                                                                                                                                                                                                                                                       | National Center for Infectious and Parasitic Diseases (NCIPD)                                                   | National Center for Infectious and Parasitic Diseases (NCIPD)                                    | Alexiev et al                                                                                                                                                                                                                                                                                                                                                                                                                                                                                                                                                                                                                                                            |
| EPI_ISL_1231567, EPI_ISL_1231600, EPI_ISL_1231705                                                                                                                                                                                                                                                                                                                                                                                                                                                                                                                                                                                                                                                                                                                                                                                                                                                                                                                                                                                                                                                                                                                                                                                                                                                                                                                                                                                                                                                                                                                                                                                                                                                                                                                                                                                                                                                                                                                                                                                                                                                                                                                                                                                                                                                                                                                                                     | National Center for Infectious and Parasitic Diseases (NCIPD)                                                   | National Center for Infectious and Parasitic Diseases (NCIPD)                                    | Alexiev et al                                                                                                                                                                                                                                                                                                                                                                                                                                                                                                                                                                                                                                                            |
| EPI_ISL_1854615                                                                                                                                                                                                                                                                                                                                                                                                                                                                                                                                                                                                                                                                                                                                                                                                                                                                                                                                                                                                                                                                                                                                                                                                                                                                                                                                                                                                                                                                                                                                                                                                                                                                                                                                                                                                                                                                                                                                                                                                                                                                                                                                                                                                                                                                                                                                                                                       | National Center of Disease Control and Prevention of the Republic of Armenia                                    | UW Virology Lab                                                                                  | Alexander Greninger; Anahit Hovhannisyan; Andranik Chavushyan; Anna Khazaryan; Arsen Arakelyan; Diana Aveyan; Gisane Khachabyan; Hong Xie; Hovsep Ghazaryan; Keith R. Jerome; Lasata Shrestha; Lyudmila Niazyan; Maria Nikoghosyan; Meei-Li Huang; Michelle Lin; Nelli Muradyan; Pavitra Roychoudhury; Roksana Zakharyan; Shah Mohamed Bakhash; Siras Hakobyan; Tamara Sirunyan                                                                                                                                                                                                                                                                                          |
| EPI_ISL_1302116, EPI_ISL_1401147, EPI_ISL_1401201, EPI_ISL_1401229, EPI_ISL_1401324, EPI_ISL_1401328, EPI_ISL_1401372, EPI_ISL_1509788, EPI_ISL_1509833, EPI_ISL_1608226, EPI_ISL_1608294, EPI_ISL_1608350, EPI_ISL_1608420, EPI_ISL_1608525, EPI_ISL_1608548, EPI_ISL_1628505, EPI_ISL_1786243, EPI_ISL_1786301, EPI_ISL_2081972, EPI_ISL_2180069, EPI_ISL_2180184, EPI_ISL_2180187, EPI_ISL_2180270, EPI_ISL_2180274, EPI_ISL_2180339, EPI_ISL_2180344, EPI_ISL_2180377, EPI_ISL_2180379, EPI_ISL_2180392, EPI_ISL_2180416, EPI_ISL_2259257, EPI_ISL_2379032, EPI_ISL_2379215, EPI_ISL_2621257, EPI_ISL_2621327, EPI_ISL_2621439, EPI_ISL_2621444, EPI_ISL_2621459, EPI_ISL_2841999, EPI_ISL_2967046, EPI_ISL_2967098, EPI_ISL_2967101, EPI_ISL_3232627, EPI_ISL_3232635, EPI_ISL_3232641, EPI_ISL_3232674, EPI_ISL_3232677, EPI_ISL_3232710, EPI_ISL_3543309, EPI_ISL_3796460, EPI_ISL_3796518, EPI_ISL_3796555, EPI_ISL_4031618, EPI_ISL_4031666, EPI_ISL_4032109, EPI_ISL_4032121, EPI_ISL_4541220, EPI_ISL_4541288, EPI_ISL_4546793, EPI_ISL_4710112, EPI_ISL_4710477, EPI_ISL_4710536, EPI_ISL_4711632, EPI_ISL_4711657, EPI_ISL_4731316, EPI_ISL_4731361, EPI_ISL_4731405, EPI_ISL_4731412, EPI_ISL_4731419, EPI_ISL_4731430, EPI_ISL_4778757, EPI_ISL_5417482, EPI_ISL_5417525, EPI_ISL_5739202, EPI_ISL_5739445, EPI_ISL_5739485, EPI_ISL_5845531, EPI_ISL_5845538, EPI_ISL_5845569, EPI_ISL_5845578, EPI_ISL_5845588, EPI_ISL_5845633, EPI_ISL_5845664, EPI_ISL_5845668, EPI_ISL_5845693, EPI_ISL_5845738, EPI_ISL_5845748, EPI_ISL_585186, EPI_ISL_5855215, EPI_ISL_6101740, EPI_ISL_6102288, EPI_ISL_6102373, EPI_ISL_6102493, EPI_ISL_6102945, EPI_ISL_6103197, EPI_ISL_6103234, EPI_ISL_6103987, EPI_ISL_6104084, EPI_ISL_6104522, EPI_ISL_6104674, EPI_ISL_6104733, EPI_ISL_6104884, EPI_ISL_6111633, EPI_ISL_6115647, EPI_ISL_6115685, EPI_ISL_6115766, EPI_ISL_6115831, EPI_ISL_6115867, EPI_ISL_6115905, EPI_ISL_6711621, EPI_ISL_6711900, EPI_ISL_6711954, EPI_ISL_7326082, EPI_ISL_7326571, EPI_ISL_7326665, EPI_ISL_7326740, EPI_ISL_7326838, EPI_ISL_7326849, EPI_ISL_7327008, EPI_ISL_7327037, EPI_ISL_7327072, EPI_ISL_7327114, EPI_ISL_7327269, EPI_ISL_7327377, EPI_ISL_7327440, EPI_ISL_7327508, EPI_ISL_7327526, EPI_ISL_7327606, EPI_ISL_7327639, EPI_ISL_7327684, EPI_ISL_7327774, EPI_ISL_7327910, EPI_ISL_7328034, EPI_ISL_7328059, EPI_ISL_7328290, EPI_ISL_7328329 |                                                                                                                 |                                                                                                  |                                                                                                                                                                                                                                                                                                                                                                                                                                                                                                                                                                                                                                                                          |
| see above                                                                                                                                                                                                                                                                                                                                                                                                                                                                                                                                                                                                                                                                                                                                                                                                                                                                                                                                                                                                                                                                                                                                                                                                                                                                                                                                                                                                                                                                                                                                                                                                                                                                                                                                                                                                                                                                                                                                                                                                                                                                                                                                                                                                                                                                                                                                                                                             | National Center of Infectious and Parasitic Diseases                                                            | National Center of Infectious and Parasitic Diseases                                             | Alexiev; Alexiev et al; Dimitrova; Dobrinov; Donchev; Grigороva L.; Grigороva L.; Hristova; Ivanov; Kantardjiev; Korsun; Philipova; Stoitsova; Stoykov; Trifonova                                                                                                                                                                                                                                                                                                                                                                                                                                                                                                        |
| EPI_ISL_2107088                                                                                                                                                                                                                                                                                                                                                                                                                                                                                                                                                                                                                                                                                                                                                                                                                                                                                                                                                                                                                                                                                                                                                                                                                                                                                                                                                                                                                                                                                                                                                                                                                                                                                                                                                                                                                                                                                                                                                                                                                                                                                                                                                                                                                                                                                                                                                                                       | National Centre For Cell Science – INSACOG                                                                      | National Centre For Cell Science                                                                 | Ajay Pillai; Dhiraj Paul; INSACOG Consortium team; Manoj Kumar Bhat; Mitali Inamdar; Mohak P Gujare; Shivang P. Bhanushali; Yogesh Shouche                                                                                                                                                                                                                                                                                                                                                                                                                                                                                                                               |
| EPI_ISL_2106786                                                                                                                                                                                                                                                                                                                                                                                                                                                                                                                                                                                                                                                                                                                                                                                                                                                                                                                                                                                                                                                                                                                                                                                                                                                                                                                                                                                                                                                                                                                                                                                                                                                                                                                                                                                                                                                                                                                                                                                                                                                                                                                                                                                                                                                                                                                                                                                       | National Centre for Disease Control                                                                             | CFDP-INSACOG                                                                                     | Ashwin Dalai; Asmita Gupta; Divya Vashisht; Murali Bashyam; Pratyusha Bala; Vinay Doripadi                                                                                                                                                                                                                                                                                                                                                                                                                                                                                                                                                                               |
| EPI_ISL_410535, EPI_ISL_414379, EPI_ISL_414380                                                                                                                                                                                                                                                                                                                                                                                                                                                                                                                                                                                                                                                                                                                                                                                                                                                                                                                                                                                                                                                                                                                                                                                                                                                                                                                                                                                                                                                                                                                                                                                                                                                                                                                                                                                                                                                                                                                                                                                                                                                                                                                                                                                                                                                                                                                                                        | National Centre for Infectious Diseases                                                                         | Programme in Emerging Infectious Diseases, Duke-NUS Medical School                               | Barnaby E Young; Danielle E Anderson; David CB Lye; Gavin JD Smith; Jayanthi Jayakumar; Martin Linster; Yan Zhuang; Yee Sin Leo; Yvonne CF Su                                                                                                                                                                                                                                                                                                                                                                                                                                                                                                                            |
| EPI_ISL_1909877, EPI_ISL_1911665                                                                                                                                                                                                                                                                                                                                                                                                                                                                                                                                                                                                                                                                                                                                                                                                                                                                                                                                                                                                                                                                                                                                                                                                                                                                                                                                                                                                                                                                                                                                                                                                                                                                                                                                                                                                                                                                                                                                                                                                                                                                                                                                                                                                                                                                                                                                                                      | National Food and Veterinary Risk Assessment Institute (NMVRVI)                                                 | National Public Health Surveillance Laboratory                                                   | Ana Steponkiene; Danas Baksa; Jelena Razmuk; Lukas Vasionis; Lukas Zemaitis; Migle Gabrielaite; Svajune Muralyte                                                                                                                                                                                                                                                                                                                                                                                                                                                                                                                                                         |
| EPI_ISL_6640857, EPI_ISL_7120860                                                                                                                                                                                                                                                                                                                                                                                                                                                                                                                                                                                                                                                                                                                                                                                                                                                                                                                                                                                                                                                                                                                                                                                                                                                                                                                                                                                                                                                                                                                                                                                                                                                                                                                                                                                                                                                                                                                                                                                                                                                                                                                                                                                                                                                                                                                                                                      | National Health Laboratory                                                                                      | Botswana Harvard HIV Reference Laboratory                                                        | Boitumelo Zuze; Botshelo Radibe; Dorcas Maruapula; Joseph Makheba; Keatrole Ntshambiwa; Kgomotso Moruisi; Legodile Kooepile; Mosepelle Mosepelle; Mphaphi B. Mbulawa; Ontametse T. Bareng; Pamela Smith-Lawrence; Roger Shapiro; Sefetogi Ramaolaga; Shahin Lockman; Sikhulle Moyo; Simani Gaseitsiwe; Thongbotho Mphoyakgosi; Wonderful T. Choga                                                                                                                                                                                                                                                                                                                        |
| EPI_ISL_1366857, EPI_ISL_1817858                                                                                                                                                                                                                                                                                                                                                                                                                                                                                                                                                                                                                                                                                                                                                                                                                                                                                                                                                                                                                                                                                                                                                                                                                                                                                                                                                                                                                                                                                                                                                                                                                                                                                                                                                                                                                                                                                                                                                                                                                                                                                                                                                                                                                                                                                                                                                                      | National Health Laboratory Service, South Africa                                                                | KRISP, KZN Research Innovation and Sequencing Platform                                           | Emmanuel SJ; Giandhari J; Khan S; Laguda-Akingba O; Lessells R; Mdlalose K; Naidoo Y; Pillay S; Ramphal U; Tegally H; Wilkinson E; York D; de Oliveira T                                                                                                                                                                                                                                                                                                                                                                                                                                                                                                                 |
| EPI_ISL_3252979                                                                                                                                                                                                                                                                                                                                                                                                                                                                                                                                                                                                                                                                                                                                                                                                                                                                                                                                                                                                                                                                                                                                                                                                                                                                                                                                                                                                                                                                                                                                                                                                                                                                                                                                                                                                                                                                                                                                                                                                                                                                                                                                                                                                                                                                                                                                                                                       | National Health Laboratory, Ministry Of Health And Sports, The Republic Of The Union Of Myanmar                 | Pathogen Genomics Center, National Institute of Infectious Diseases                              | Eh Htoo Pe; Htay Htay Tin; Kentaro Itokawa; Makoto Kuroda; Masanori Hashino; Reiko Saito; Rina Tanaka; Tsuyoshi Sekizuka; Wint Wint Phyu                                                                                                                                                                                                                                                                                                                                                                                                                                                                                                                                 |
| EPI_ISL_416036                                                                                                                                                                                                                                                                                                                                                                                                                                                                                                                                                                                                                                                                                                                                                                                                                                                                                                                                                                                                                                                                                                                                                                                                                                                                                                                                                                                                                                                                                                                                                                                                                                                                                                                                                                                                                                                                                                                                                                                                                                                                                                                                                                                                                                                                                                                                                                                        | National Influenza Center - Instituto Adolfo Lutz                                                               | Instituto Adolfo Lutz, Interdisciplinary Procedures Center, Strategic Laboratory                 | Adriana Bugno; Adriano Abbud; Carlos Henrique Camargo; Claudia Regina Gonçalves; Claudio Tavares Sacchi; Daniela Bernardes Borges da Silva; Erica Valessa Ramos Gomes; Fabiana Cristina Pereira dos Santos; Maria do Carmo Sampaio Tavares Timenetsky; Simone Guadagnucci Morillo; Terezinha Maria de Paiva                                                                                                                                                                                                                                                                                                                                                              |
| EPI_ISL_408668                                                                                                                                                                                                                                                                                                                                                                                                                                                                                                                                                                                                                                                                                                                                                                                                                                                                                                                                                                                                                                                                                                                                                                                                                                                                                                                                                                                                                                                                                                                                                                                                                                                                                                                                                                                                                                                                                                                                                                                                                                                                                                                                                                                                                                                                                                                                                                                        | National Influenza Center - National Institute of Hygiene and Epidemiology (NIHE)                               | National Influenza Center - National Institute of Hygiene and Epidemiology (NIHE)                | ; Hoang Vu Mai Phuong; Le Thi Quynh Mai; Le Thi Thanh; Nguyen Le Khanh Hang; Nguyen Phuong Anh; Nguyen Vu Son; Pham Thi Hien; Tran Thu Huong; Ung Thi Hong Trang; Vuong Duc Cuong                                                                                                                                                                                                                                                                                                                                                                                                                                                                                        |
| EPI_ISL_416429                                                                                                                                                                                                                                                                                                                                                                                                                                                                                                                                                                                                                                                                                                                                                                                                                                                                                                                                                                                                                                                                                                                                                                                                                                                                                                                                                                                                                                                                                                                                                                                                                                                                                                                                                                                                                                                                                                                                                                                                                                                                                                                                                                                                                                                                                                                                                                                        | National Influenza Center, National Institute of Hygiene and Epidemiology (NIHE)                                | National Influenza Center,                                                                       | Dang Duc Anh; Futoshi Hasebe; Hoang Vu Mai Phuong; Kouichi Morita; Le Quynh Mai; Le Thi Thanh; Meng Ling Moi; Nguyen Le Khanh Hang; Nguyen Phuong Anh; Nguyen Vu Son; Pham Hong Quynh Anh; Pham Thi Hien; Taichiro Takemura; Takeshi                                                                                                                                                                                                                                                                                                                                                                                                                                     |

|                                                                                                                                                                                           |                                                                                                 |                                                                                                                                                                                                                                      |                                                                                                                                                                                                                                                                                                                                                                                                                                            |
|-------------------------------------------------------------------------------------------------------------------------------------------------------------------------------------------|-------------------------------------------------------------------------------------------------|--------------------------------------------------------------------------------------------------------------------------------------------------------------------------------------------------------------------------------------|--------------------------------------------------------------------------------------------------------------------------------------------------------------------------------------------------------------------------------------------------------------------------------------------------------------------------------------------------------------------------------------------------------------------------------------------|
|                                                                                                                                                                                           |                                                                                                 | National Institute of Hygiene and Epidemiology (NIHE)                                                                                                                                                                                | Nabeshima; Tran Thu Huong; Ung Thi Hong Trang; Vuong Duc Cuong                                                                                                                                                                                                                                                                                                                                                                             |
| EPI_ISL_2535792                                                                                                                                                                           | National Influenza Centre                                                                       | National Influenza Centre                                                                                                                                                                                                            | ; Benjamin B. Lindsey; Benjamin H. Foulkes; Dennis Laryea; Ernest Asiedu; Franklin Asiedu-Bekoe; Gordon Awandare; Ivy A. Asante; Joseph Oliver-Commye; Joyce Ngoi; Linda Boatemaa; Lorreta Kwasa; Mathew D. Parker; Michael Marks; Mildred Adusei-Poku; Sharon Hsu; Thushan I de Silva; William K. Ampofo                                                                                                                                  |
| EPI_ISL_410301                                                                                                                                                                            | National Influenza Centre, National Public Health Laboratory, Kathmandu, Nepal                  | The University of Hong Kong                                                                                                                                                                                                          | Alfonso J. Rodriguez-Morales; Anup Bastola; Basu Dev Pandey; Bibek Kumar Lal; Daniel Chu; Haoguo Gu; Leo Poon; Malik Peiris; Ranjit Sah; Runa Jha                                                                                                                                                                                                                                                                                          |
| EPI_ISL_1469262                                                                                                                                                                           | National Institute Health Research and Development                                              | National Institute of Health Research and Development                                                                                                                                                                                | Agustiningih; Arie Ardiansyah Nugraha; Fauzul Muna; Hana Apsari Pawestri; Hartanti Dian Ikawati; Herna; Holy Arif Wibowo; Irene Lorinda Indalao; Kartika Dewi Puspa; Kindi Adam; Krisna Nur Andriana Pangesti; Natalie Laurencia Kipuw; Nely Puspandari; Ni Ketut Susilarini; Nike Susanti; Nurika Hariastuti; Reni Herman; Ririn Ramadhany; Subangkit; Tati Febrianti; Triyani Soekarso; Uly Alfi Nikmah; Vivi Setiawaty.; Yuni Rukminiat |
| EPI_ISL_417186, EPI_ISL_3219781, EPI_ISL_3219883, EPI_ISL_3219891                                                                                                                         | National Institute for Communicable Diseases of the National Health Laboratory Service          | National Institute for Communicable Diseases of the National Health Laboratory Service                                                                                                                                               | A; Allam M; Amoako DG; Bhiman JN; Everett J; Ismail A; Khumalo Z; Kwenda S; Mahlangu B; Mnguni A; Mohale T; Ntuli N; Scheepers C; Subramoney K; van Heusden P; von Gottberg                                                                                                                                                                                                                                                                |
| EPI_ISL_1909958, EPI_ISL_1909959, EPI_ISL_1910045, EPI_ISL_1910049, EPI_ISL_1910116, EPI_ISL_1910175, EPI_ISL_1910233, EPI_ISL_1910237, EPI_ISL_1911499, EPI_ISL_1911567, EPI_ISL_1911897 | see above                                                                                       | National Public Health Surveillance Laboratory                                                                                                                                                                                       | Ana Steponkiene; Danas Baksa; Jelena Razmuk; Lukas Vasionis; Lukas Zemaitis; Migle Gabrielaite; Svajune Muralyte                                                                                                                                                                                                                                                                                                                           |
| EPI_ISL_408485, EPI_ISL_408486, EPI_ISL_408488                                                                                                                                            | National Institute for Viral Disease Control and Prevention, China CDC                          | National Institute for Viral Disease Control & Prevention, CCDC                                                                                                                                                                      | Baoying Huang; Fei Ye; George F. Gao; Guizhen Wu; Jianxiang Li; Kangchen Zhao; Li Zhao; Peihua Niu; Quanyi Wang; Roujian Lu; Shenjiao Wang; Wenbo Xu; Wenjie Tan; Wenling Wang; Xiang Zhao; Yang Pan; Yong Shi                                                                                                                                                                                                                             |
| EPI_ISL_402119                                                                                                                                                                            | National Institute for Viral Disease Control and Prevention, China CDC                          | National Institute for Viral Disease Control and Prevention, China CDC                                                                                                                                                               | Ji Wang; Weimin Zhou; Peihua Niu; Peipei Liu; Faxian Zhan; Welfeng Shi.; Baoying Huang, Jun Liu, Li Zhao, Yao Meng, Xiaozhou He, Fei Ye, Na Zhu, Yang Li, Jing Chen, Wenbo Xu, George F. Gao, Guizhen Wu; Wenjie Tan, Xiang Zhao, Wenling Wang, Xuejun Ma, Yongzhong Jiang, Roujian Lu                                                                                                                                                     |
| EPI_ISL_1447467                                                                                                                                                                           | National Institute of Infectious Diseases (NIID)                                                | National Institute of Infectious Diseases (NIID)                                                                                                                                                                                     | Hideka Miura; Kentaro Itokawa; Kiyoko Okamoto; Kumiko Araki; Makoto Kuroda; Masanori Hashino; Rina Tanaka; Seiichiro Fujisaki; Shinichiro Hirai; Tsuyoshi Sekizuka                                                                                                                                                                                                                                                                         |
| EPI_ISL_3259564                                                                                                                                                                           | National Institute of Infectious Diseases-Prof. Dr. Matei Bals Molecular Diagnostics Laboratory | National Institute of Infectious Diseases-Prof. Dr. Matei Bals Molecular Diagnostics Laboratory                                                                                                                                      | Corina Casangiu; Dan Otelea; Leontina Banica; Marius Surleac; Ovidiu Vlaicu; Petre Milu; Robert Hohan; Simona Paraschiv                                                                                                                                                                                                                                                                                                                    |
| EPI_ISL_1492082, EPI_ISL_1492119, EPI_ISL_1492192, EPI_ISL_1588494, EPI_ISL_3229667                                                                                                       | National Institute of Public Health                                                             | National Institute of Public Health                                                                                                                                                                                                  | Alexander Nagy; Dusan Trnka; Helena Jirincova; Jaromira Vecerova; Timotej Suri                                                                                                                                                                                                                                                                                                                                                             |
| EPI_ISL_1261241                                                                                                                                                                           | National Institute of Public Health                                                             | National Reference Laboratory for Influenza and Respiratory Viruses CZE                                                                                                                                                              | Alexander Nagy; Dusan Trnka; Helena Jirincova; Jaromira Vecerova; Timotej Suri                                                                                                                                                                                                                                                                                                                                                             |
| EPI_ISL_1745015                                                                                                                                                                           | National Institute of Public Health - National Institute of Hygiene                             | 1. National Institute of Public Health - National Institute of Hygiene, Warsaw, Poland<br>2. Biobank Lab, University of Lodz<br>3. Laboratory of Respiratory Viruses, Teaching and Clinical Center of the Medical University of Lodz | Dominik Strapagiel; Izabela Drózd; Jakub Lach; Katarzyna Zacharczuk; Klaudyna Królowska; Maciej Borowiec; Magdalena Nowakowska; Magdalena Traczyk-Borszyńska; Marcin Słomka; Marta Sobalska-Kwapis; Małgorzata Sadkowska-Todys; Tomasz Płoszaj; Tomasz Wolkowicz                                                                                                                                                                           |
| EPI_ISL_1625234, EPI_ISL_1817423                                                                                                                                                          | National Laboratory for Health, Environment and Food, OMM, Celje                                | NLZOH (National Laboratory for Health, Environment and Food) / CISLD (Clinical Institute of Special Laboratory Diagnostics), University Children's Hospital, University Medical Center Ljubljana                                     | Aleksander Kocuvan; Aleksander Mahnic; Alenka Štorman; Ana Grom; Barbara Jenko Bizjan; Daša Kavka / Jernej Kovač; Kaja Tominc; Katarina Kozmos; Maja Rupnik; Marko Pokorn; Maruša Debeljak; Mateja Borinc; Maša Jarčič; Nika Gobec; Robert Šket; Sandra Janežic; Tadej Battelino; Tine Tesovnik; Tjasa Zohar Čretnik                                                                                                                       |
| EPI_ISL_1625408, EPI_ISL_1625459                                                                                                                                                          | National Laboratory for Health, Environment and Food, OMM, Koper                                | NLZOH (National Laboratory for Health, Environment and Food) / CISLD (Clinical Institute of Special Laboratory Diagnostics), University Children's Hospital, University Medical Center Ljubljana                                     | Aleksander Kocuvan; Aleksander Mahnic; Alenka Štorman; Ana Grom; Barbara Jenko Bizjan; Gašper Strugar; Kaja Tominc; Katarina Kozmos; Maja Rupnik; Marko Pokorn; Maruša Debeljak; Maša Jarčič; Mitja Rak / Jernej Kovač; Nika Gobec; Robert Šket; Sandra Janežic; Tadej Battelino; Tina Cvetković; Tine Tesovnik; Tjasa Zohar Čretnik                                                                                                       |
| EPI_ISL_1625191                                                                                                                                                                           | National Laboratory for Health, Environment and Food, OMM, Kranj                                | NLZOH (National Laboratory for Health, Environment and Food) / CISLD (Clinical Institute of Special Laboratory Diagnostics), University Children's Hospital, University Medical Center Ljubljana                                     | Aleksander Kocuvan; Aleksander Mahnic; Alenka Štorman; Ana Grom; Barbara Jenko Bizjan; Kaja Tominc; Katarina Kozmos; Maja Rupnik; Marjana Petrevčič / Jernej Kovač; Marko Pokorn; Maruša Debeljak; Mateja Ravnik; Maša Jarčič; Monika Korošec; Nika Gobec; Robert Šket; Sandra Janežic; Tadej Battelino; Tine Tesovnik; Tjasa Zohar Čretnik                                                                                                |
| EPI_ISL_1240391, EPI_ISL_1240614, EPI_ISL_1240620, EPI_ISL_1267118                                                                                                                        | National Laboratory for Health, Environment and Food, OMM, Maribor                              | CISLD (Clinical Institute of Special Laboratory Diagnostics), University Children's Hospital, University Medical Center Ljubljana                                                                                                    | Ana Grom; Barbara Jenko Bizjan; Jernej Kovač; Katarina Kozmos; Marko Pokorn; Maruša Debeljak; Robert Šket; Tadej Battelino; Tine Tesovnik                                                                                                                                                                                                                                                                                                  |
| EPI_ISL_1625044, EPI_ISL_1625055, EPI_ISL_1817116, EPI_ISL_1625215                                                                                                                        | National Laboratory for Health, Environment and Food, OMM, Maribor                              | NLZOH (National Laboratory for Health, Environment and Food) / CISLD (Clinical Institute of Special Laboratory Diagnostics), University Children's Hospital, University Medical Center Ljubljana                                     | Aleksander Kocuvan; Aleksander Mahnic; Alenka Štorman; Ana Grom; Andrej Golle / Jernej Kovač; Barbara Jenko Bizjan; Kaja Tominc; Katarina Kozmos; Maja Rupnik; Marko Pokorn; Maruša Debeljak; Maša Jarčič; Mojca Cimerman; Nika Gobec; Nika Volmajer; Robert Šket; Sandra Janežic; Tadej Battelino; Tine Tesovnik; Tjasa Zohar Čretnik                                                                                                     |
| EPI_ISL_1625481                                                                                                                                                                           | National Laboratory for Health, Environment and Food, OMM, Novo mesto                           | NLZOH (National Laboratory for Health, Environment and Food) / CISLD (Clinical Institute of Special Laboratory Diagnostics), University Children's Hospital, University Medical Center Ljubljana                                     | Aleksander Kocuvan; Aleksander Mahnic; Alenka Štorman; Ana Grom; Barbara Jenko Bizjan; David Cvetko; Kaja Tominc; Katarina Kozmos; Maja Rupnik; Marko Pokorn; Maruša Debeljak; Matjaž Retelj / Jernej Kovač; Maša Jarčič; Nika Gobec; Robert Šket; Sandra Janežic; Tadej Battelino; Tatjana Harlander; Tine Tesovnik; Tjasa Zohar Čretnik                                                                                                  |
| EPI_ISL_1623693, EPI_ISL_1801784                                                                                                                                                          | National Platform bis UMONS/Jolimont                                                            | National Platform bis UMONS/Jolimont                                                                                                                                                                                                 | Florian Juszcak; François Dufresne; Gautier Detry; Guillaume Bayon-Vicente; Ruddy Wattiez                                                                                                                                                                                                                                                                                                                                                  |
| EPI_ISL_3235100, EPI_ISL_3235108, EPI_ISL_3235114, EPI_ISL_3235123, EPI_ISL_3235134, EPI_ISL_3235145, EPI_ISL_3235154, EPI_ISL_3235175, EPI_ISL_3235185, EPI_ISL_3235194, EPI_ISL_3235226 | see above                                                                                       | Laboratory of Respiratory Viruses and Measles, Oswaldo Cruz Institute, FIOCRUZ                                                                                                                                                       | Alice Sampaio Rocha; Ana Carolina Mendonca; Anna Carolina Paixao; Elisa Cavalcante Pereira; Fernando Motta; Luciana Appolinario; Marilda Siqueira on behalf of the Fiocruz COVID-19 Genomic Surveillance Network; Michelle Hamilton; Paola Resende; Renata Serrano Lopes; Taina Venas                                                                                                                                                      |
| EPI_ISL_416829, EPI_ISL_416866, EPI_ISL_416907                                                                                                                                            | National Public Health Laboratory                                                               | Malaysia Genome Institute                                                                                                                                                                                                            | Azrin Ahmad; Enizza Kasim; Hani Mat Hussin; Irni Suhayu Sapian; Mohd Faizal Abu Bakar; Mohd Noor Mat Isa; Noorliza Mohamad Noordin; Nor Azfa Johari; Norazimah Tajudin; Nurhezreen Md Iqbal; Rehan Shuhada Abu Bakar; Selvanesan Sengol; Shahrul Hisham Zainal Ariffin; Shamsidar Sopi; Siti Noraini Othman; W Afiza W Mohd Arifin; Yu Kie Chem; Yusuf Muhammad Noor                                                                       |
| EPI_ISL_3184584                                                                                                                                                                           | National Public Health Laboratory                                                               | National Public Health Laboratory/CSIR-Institute of Genomics and Integrative Biology                                                                                                                                                 | National Public Health Laboratory Team                                                                                                                                                                                                                                                                                                                                                                                                     |
| EPI_ISL_2009232                                                                                                                                                                           | National Public Health Laboratory Malaysia                                                      | National Public Health Laboratory Malaysia                                                                                                                                                                                           | Aziyati O; Chong CK; Hani MH; Hannah PYP; JL Tan; Kamal HKZ; Mohd AY; Noorliza MN; Norazimah T; Norhayati R; NurulAina MCA; Nurulsyahida I; Rehan SAB; Selvanesan S; Ushananthony R; W.NurAfiza WMA Zirwatul AA; YF Ngeow; Yukie C                                                                                                                                                                                                         |
| EPI_ISL_410713, EPI_ISL_1704832, EPI_ISL_2790296, EPI_ISL_2790297, EPI_ISL_2790335, EPI_ISL_3186010, EPI_ISL_3186017, EPI_ISL_3186887, EPI_ISL_3262026, EPI_ISL_3266157                   | see above                                                                                       | National Public Health                                                                                                                                                                                                               | Cui L; Grace Jie Yin Ngan; Katherine Ching; Lin Cui; Lin RTP; Mak TM; Octavia S; Raymond Tzer Pin Lin; Royce Ang; Tze Minn Mak; Zhenyang Zhou                                                                                                                                                                                                                                                                                              |

|                                                                                                                                                                                                                                                                                                                                                                                                                                                                                                                                                                                                                                                                                                                                                                                                                                                                                                   |                                                                                                                                                                                                                     |                                                                                                                                                                                                             |                                                                                                                                                                                                                                                                                                                                                                                           |
|---------------------------------------------------------------------------------------------------------------------------------------------------------------------------------------------------------------------------------------------------------------------------------------------------------------------------------------------------------------------------------------------------------------------------------------------------------------------------------------------------------------------------------------------------------------------------------------------------------------------------------------------------------------------------------------------------------------------------------------------------------------------------------------------------------------------------------------------------------------------------------------------------|---------------------------------------------------------------------------------------------------------------------------------------------------------------------------------------------------------------------|-------------------------------------------------------------------------------------------------------------------------------------------------------------------------------------------------------------|-------------------------------------------------------------------------------------------------------------------------------------------------------------------------------------------------------------------------------------------------------------------------------------------------------------------------------------------------------------------------------------------|
| EPI_ISL_3184525                                                                                                                                                                                                                                                                                                                                                                                                                                                                                                                                                                                                                                                                                                                                                                                                                                                                                   | National Public Health Laboratory/Baitadi, COVID-19 PCR Lab                                                                                                                                                         | Laboratory, National Centre for Infectious Diseases<br>National Public Health Laboratory/CSIR-Institute of Genomics and Integrative Biology                                                                 | COVID-19 PCR Lab Team; National Public Health Laboratory Team /Baitadi                                                                                                                                                                                                                                                                                                                    |
| EPI_ISL_3184529                                                                                                                                                                                                                                                                                                                                                                                                                                                                                                                                                                                                                                                                                                                                                                                                                                                                                   | National Public Health Laboratory/Bharatpur Hospital COVID-19 PCR Lab                                                                                                                                               | National Public Health Laboratory/CSIR-Institute of Genomics and Integrative Biology                                                                                                                        | National Public Health Laboratory Team /Bharatpur Hospital COVID-19 PCR Lab Team                                                                                                                                                                                                                                                                                                          |
| EPI_ISL_2095970,<br>EPI_ISL_2095991                                                                                                                                                                                                                                                                                                                                                                                                                                                                                                                                                                                                                                                                                                                                                                                                                                                               | National Public Health Surveillance Laboratory                                                                                                                                                                      | National Public Health Surveillance Laboratory                                                                                                                                                              | Ana Steponkiene; Danas Baksa; Jelena Razmuk; Lukas Vasionis; Lukas Zemaitis; Migle Gabrielaite; Svajune Muralyte                                                                                                                                                                                                                                                                          |
| EPI_ISL_7139574,<br>EPI_ISL_7139681,<br>EPI_ISL_7139704,<br>EPI_ISL_7139732,<br>EPI_ISL_7140003                                                                                                                                                                                                                                                                                                                                                                                                                                                                                                                                                                                                                                                                                                                                                                                                   | National Reference Laboratory, Laboratories Department, Cotonou, Benin                                                                                                                                              | Noguchi Memorial Institute for Medical Research, University of Ghana, Legon, Ghana                                                                                                                          | Ange D. Dossou; Anges W. Yadouleton; Benjamin I.B. Hounkpatin; Bright Adu; Hilda Opoku Frempong; Joyce Apiah-Kubi; Keren O. Attiku; Quaneeta Mohhtar; Rene K. Keke                                                                                                                                                                                                                        |
| EPI_ISL_1055166, EPI_ISL_1092736, EPI_ISL_1299425, EPI_ISL_1323733, EPI_ISL_1323745, EPI_ISL_1323812, EPI_ISL_1357992, EPI_ISL_1398791, EPI_ISL_1500029, EPI_ISL_1552433, EPI_ISL_1552631, EPI_ISL_1589356, EPI_ISL_1589358, EPI_ISL_1589505, EPI_ISL_1732252, EPI_ISL_1785278, EPI_ISL_1791245, EPI_ISL_1960774, EPI_ISL_2029320, EPI_ISL_2789656, EPI_ISL_2968192, EPI_ISL_2968277, EPI_ISL_2968281, EPI_ISL_3204911, EPI_ISL_3204917, EPI_ISL_3204928, EPI_ISL_3205040, EPI_ISL_3205054, EPI_ISL_3205187, EPI_ISL_3205188, EPI_ISL_3205221, EPI_ISL_3205255, EPI_ISL_3205289, EPI_ISL_3205338, EPI_ISL_3205374, EPI_ISL_3205431, EPI_ISL_3205459, EPI_ISL_3247550, EPI_ISL_3247554, EPI_ISL_3247703, EPI_ISL_3247742, EPI_ISL_3253027, EPI_ISL_3253058, EPI_ISL_3253096, EPI_ISL_3253126, EPI_ISL_3253128, EPI_ISL_3253129, EPI_ISL_3253143, EPI_ISL_3253194, EPI_ISL_3253212, EPI_ISL_3253221 | National Virus Reference Laboratory                                                                                                                                                                                 | Calum Walsh; Charlene Bennet; Charlene Bennett; Cillian F De Gascun; Fiona Crispie; Gabriel Gonzalez; Guerrino Macori; Jonathan Dean; Matthew McCabe; Michael Carr; Paul Cotter; Seamus Fanning; Zoe Yandle |                                                                                                                                                                                                                                                                                                                                                                                           |
| see above                                                                                                                                                                                                                                                                                                                                                                                                                                                                                                                                                                                                                                                                                                                                                                                                                                                                                         | National Virus Reference Laboratory                                                                                                                                                                                 | National Virus Reference Laboratory                                                                                                                                                                         |                                                                                                                                                                                                                                                                                                                                                                                           |
| EPI_ISL_1270792                                                                                                                                                                                                                                                                                                                                                                                                                                                                                                                                                                                                                                                                                                                                                                                                                                                                                   | Nevada State Public Health Laboratory                                                                                                                                                                               | Nevada State Public Health Laboratory                                                                                                                                                                       | Andrew Gorzalski; Mark Pandori                                                                                                                                                                                                                                                                                                                                                            |
| EPI_ISL_1493409,<br>EPI_ISL_3229301                                                                                                                                                                                                                                                                                                                                                                                                                                                                                                                                                                                                                                                                                                                                                                                                                                                               | New Mexico Department of Health Scientific Laboratory                                                                                                                                                               | New Mexico Department of Health Scientific Laboratory                                                                                                                                                       | Anastacia Griego-Fisher; D'eldra Malone; Ellie Johnson; Jennifer Benoit; Linda Salazar Anastacia Griego-Fisher; Ratheesh Rajan; T. Mark Willmon                                                                                                                                                                                                                                           |
| EPI_ISL_3280946,<br>EPI_ISL_3281006                                                                                                                                                                                                                                                                                                                                                                                                                                                                                                                                                                                                                                                                                                                                                                                                                                                               | New South Wales Health Pathology Royal Prince Alfred Hospital                                                                                                                                                       | Microbiology RPAH                                                                                                                                                                                           | Au, J.; Bull, R.; Deveson, I.; Foster, C.; Rawlinson, W.; Ruiz Silva, M.; Van Hal, S.                                                                                                                                                                                                                                                                                                     |
| EPI_ISL_3183699                                                                                                                                                                                                                                                                                                                                                                                                                                                                                                                                                                                                                                                                                                                                                                                                                                                                                   | Niigata Prefectural Institute of Public Health and Environmental Sciences                                                                                                                                           | Niigata Prefectural Institute of Public Health and Environmental Sciences                                                                                                                                   | Kaori Watanabe; Kentaro Itokawa; Makoto Kuroda; Masanori Hashino; Miyako Kon; Reiko Arai; Rina Tanaka; Takanori Hayashi; Tsutomu Tamura; Tsuyoshi Sekizuka                                                                                                                                                                                                                                |
| EPI_ISL_1131170                                                                                                                                                                                                                                                                                                                                                                                                                                                                                                                                                                                                                                                                                                                                                                                                                                                                                   | Niigata Prefectural Institute of Public Health and Environmental Sciences                                                                                                                                           | Pathogen Genomics Center, National Institute of Infectious Diseases                                                                                                                                         | Kentaro Itokawa; Makoto Kuroda; Masanori Hashino; Rina Tanaka; Tsuyoshi Sekizuka                                                                                                                                                                                                                                                                                                          |
| EPI_ISL_1254582,<br>EPI_ISL_1317638,<br>EPI_ISL_1490412,<br>EPI_ISL_1547619,<br>EPI_ISL_1820759                                                                                                                                                                                                                                                                                                                                                                                                                                                                                                                                                                                                                                                                                                                                                                                                   | Nordland Hospital - Bodo, Laboratory Department, Molecular Biology Unit                                                                                                                                             | Norwegian Institute of Public Health, Department of Virology                                                                                                                                                | Atiya R Ali; Debech Nadia; Engebretsen Serina Beate; Garcia Llorente Ignacio; Hilde Elshaug; Hilde Vollan; Jon Bråte; Kamilla Heddeland Instefjord; Karoline Bragstad; Kathrine Stene-Johansen; Marie Paulsen Madsen; Olav Hungnes; Pedersen Benedikte Nevjen; Rasmus Riis Kopperud                                                                                                       |
| EPI_ISL_1612372                                                                                                                                                                                                                                                                                                                                                                                                                                                                                                                                                                                                                                                                                                                                                                                                                                                                                   | North Dakota Department of Health, Public Health Laboratory                                                                                                                                                         | North Dakota Department of Health, Public Health Laboratory                                                                                                                                                 | Lisa Wingerter                                                                                                                                                                                                                                                                                                                                                                            |
| EPI_ISL_1732011                                                                                                                                                                                                                                                                                                                                                                                                                                                                                                                                                                                                                                                                                                                                                                                                                                                                                   | North Estonia Medical Centre                                                                                                                                                                                        | 1. Laboratory of Communicable Diseases (Estonia); 2. Eurofins Genomics Europe Sequencing GmbH                                                                                                               | Liidia Dotsenko et al.                                                                                                                                                                                                                                                                                                                                                                    |
| EPI_ISL_1470123                                                                                                                                                                                                                                                                                                                                                                                                                                                                                                                                                                                                                                                                                                                                                                                                                                                                                   | North Estonia Medical Centre laboratory                                                                                                                                                                             | 1. Laboratory of Communicable Diseases (Estonia); 2. Eurofins Genomics Europe Sequencing GmbH                                                                                                               | Liidia Dotsenko et al.                                                                                                                                                                                                                                                                                                                                                                    |
| EPI_ISL_5332928                                                                                                                                                                                                                                                                                                                                                                                                                                                                                                                                                                                                                                                                                                                                                                                                                                                                                   | North Lantau Hospital                                                                                                                                                                                               | Hong Kong Department of Health                                                                                                                                                                              | Alan K.L. Tsang; Edman T.K. Lam; Ken H.L. Ng; Peter C.W. Yip; Rickjason C.W. Chan                                                                                                                                                                                                                                                                                                         |
| EPI_ISL_1308206,<br>EPI_ISL_1309312,<br>EPI_ISL_1978385,<br>EPI_ISL_3288763,<br>EPI_ISL_3288902,<br>EPI_ISL_3288941                                                                                                                                                                                                                                                                                                                                                                                                                                                                                                                                                                                                                                                                                                                                                                               | Northumbria University / South Tees Hospitals NHS Foundation Trust / North Cumbria Integrated Care NHS Foundation Trust / North Tees and Hartlepool NHS Foundation Trust / Newcastle Hospitals NHS Foundation Trust | COVID-19 Genomics UK (COG-UK) Consortium                                                                                                                                                                    | Andrew Nelson; Brendan Payne; Clive Graham; Darren L Smith; Debra Padgett; Edward Barton; Emma Swindells; Garren Scott; Gary Black; Gary Eltringham; Giles S Holt; Greg R Young; Jane Greenaway; Jennifer Collins; John Allan; Joshua Loh; Lynn Dover; Matthew Bashton; Mohammad A Tariq; Paul Baker; Sarah Essex; Steve Liggett; Wen C Yew; Yusri Taha                                   |
| EPI_ISL_3185867                                                                                                                                                                                                                                                                                                                                                                                                                                                                                                                                                                                                                                                                                                                                                                                                                                                                                   | Northwestern Memorial Hospital                                                                                                                                                                                      | Northwestern University - Ozer Lab                                                                                                                                                                          | Chad J. Achenbach; Chao Qi; Egon A. Ozer; Judd F. Hultquist; Lucy M. Simons; Lawrence J. Jennings; Michael G. Ison; Ramon Lorenzo-Redondo; Taylor J. Dean                                                                                                                                                                                                                                 |
| EPI_ISL_1578891,<br>EPI_ISL_1820792,<br>EPI_ISL_2226086                                                                                                                                                                                                                                                                                                                                                                                                                                                                                                                                                                                                                                                                                                                                                                                                                                           | Norwegian Institute of Public Health, Department of Virology                                                                                                                                                        | Norwegian Institute of Public Health, Department of Virology                                                                                                                                                | Atiya R Ali; Debech Nadia; Engebretsen Serina Beate; Garcia Llorente Ignacio; Hilde Elshaug; Hilde Vollan; Jon Bråte; Kamilla Heddeland Instefjord; Karoline Bragstad; Kathrine Stene-Johansen; Marie Paulsen Madsen; Olav Hungnes; Pedersen Benedikte Nevjen; Rasmus Riis Kopperud                                                                                                       |
| EPI_ISL_1685359                                                                                                                                                                                                                                                                                                                                                                                                                                                                                                                                                                                                                                                                                                                                                                                                                                                                                   | Noth Estonia Medical Centre                                                                                                                                                                                         | 1. Laboratory of Communicable Diseases (Estonia); 2. Eurofins Genomics Europe Sequencing GmbH                                                                                                               | Liidia Dotsenko et al.                                                                                                                                                                                                                                                                                                                                                                    |
| EPI_ISL_1301782                                                                                                                                                                                                                                                                                                                                                                                                                                                                                                                                                                                                                                                                                                                                                                                                                                                                                   | Nucleic Acid Testing, National Reference Laboratory                                                                                                                                                                 | GIGA Medical Genomics                                                                                                                                                                                       | Bouchra Boujemla; Esperence Umumararungu; Jacob Souopgui; Keith Durkin; Léon Mutesa; Maria Artesi; Marie-Pierre Hayette; Nathalie Renotte; Patrick Tuyisenge; Robert Rutayisire; Sabin Nsanzimana; Swaibu Gatara; Sébastien Bontems; Vincent Bours; Yvan Butera                                                                                                                           |
| EPI_ISL_5502894                                                                                                                                                                                                                                                                                                                                                                                                                                                                                                                                                                                                                                                                                                                                                                                                                                                                                   | Nyanyangbwe HIV Reference Laboratory                                                                                                                                                                                | Botswana Harvard HIV Reference Laboratory                                                                                                                                                                   | Boitumelo J. L. Zuze; Botshelo Radibe; Dorcas Maruapula; Joseph Makhema; Keoratile Ntshambiwa; Kgomotso Moruisi; Legodile Koepile; Letsibogo Gaoraelwe; Mosepele Mosepele; Mphaphi B. Mbulawa; Ontlametse T. Bareng; Pamela Smith-Lawrence; Roger Shapiro; Sefetogi Ramaolaga; Shahin Lockman; Sikhulile Moyo; Simani Gasetlswi; Thela Tefelo; Thongbotho Mphoyakgosi; Wonderful T. Choga |
| EPI_ISL_509194, EPI_ISL_832586, EPI_ISL_832758, EPI_ISL_1541368, EPI_ISL_1541437, EPI_ISL_1541466, EPI_ISL_1541537, EPI_ISL_1541856, EPI_ISL_1541872, EPI_ISL_1541940                                                                                                                                                                                                                                                                                                                                                                                                                                                                                                                                                                                                                                                                                                                             | see above                                                                                                                                                                                                           | Oregon SARS-CoV-2 Genome Sequencing Center                                                                                                                                                                  | Alec J. Hirsch; Andrew C. Adey; Benjamin N. Bimber; Brendan L. O'Connell; Brian J. O'Roak; Daniel N. Streblov; Donna Hansel; Guang Fan; Kayla Carter; Ruth V. Nichols; Sally B. Grindstaff; Sally Grindstaff; Sonia Acharya; William B. Messer; Xuan Qin                                                                                                                                  |
| EPI_ISL_2402540,<br>EPI_ISL_7310167                                                                                                                                                                                                                                                                                                                                                                                                                                                                                                                                                                                                                                                                                                                                                                                                                                                               | OLVZ Aalst                                                                                                                                                                                                          | OLVZ Aalst                                                                                                                                                                                                  | Astrid Holderbeke                                                                                                                                                                                                                                                                                                                                                                         |
| EPI_ISL_2840718,<br>EPI_ISL_2982190,<br>EPI_ISL_3233051,<br>EPI_ISL_3233113,<br>EPI_ISL_3427390                                                                                                                                                                                                                                                                                                                                                                                                                                                                                                                                                                                                                                                                                                                                                                                                   | OSPEDALE CIVILE TERAMO - CENTRO TRASFUSIONALE                                                                                                                                                                       | Istituto Zooprofilattico Sperimentale dell'Abruzzo e Molise "G. Caporale"                                                                                                                                   | Ancora M; Calistri P; Cammà C; Caporale M; Curini V; Delli Compagni E; Di Domenico M; Di Lollo Valeria; Di Pasquale A; Lorusso A; Mangone I; Marccacci M; Puglia I; Rinaldi A; Savini G; Scialabba S                                                                                                                                                                                      |
| EPI_ISL_3734000,<br>EPI_ISL_4073265,<br>EPI_ISL_4990389,<br>EPI_ISL_5984601                                                                                                                                                                                                                                                                                                                                                                                                                                                                                                                                                                                                                                                                                                                                                                                                                       | OSPEDALE SAN SALVATORE - MEDICINA DI LABORATORIO                                                                                                                                                                    | Istituto Zooprofilattico Sperimentale dell'Abruzzo e Molise "G. Caporale"                                                                                                                                   | Ancora M; Calistri P; Cammà C; Caporale M; Curini V; Delli Compagni E; Di Domenico M; Di Lollo Valeria; Di Pasquale A; Lorusso A; Mangone I; Marccacci M; Puglia I; Rinaldi A; Savini G; Scialabba S                                                                                                                                                                                      |
| EPI_ISL_6582776,<br>EPI_ISL_6582777,<br>EPI_ISL_6582778,<br>EPI_ISL_6582790,<br>EPI_ISL_6582809,<br>EPI_ISL_6582819                                                                                                                                                                                                                                                                                                                                                                                                                                                                                                                                                                                                                                                                                                                                                                               | Ochsner Health                                                                                                                                                                                                      | BioInfoExperts                                                                                                                                                                                              | Amy Feehan; Ben Lain; Chris Huston; David J. Nolan; Judy Crabtree; Julia-Garcia-Diaz; Lucio Miele; Rebecca Rose; Samuel Moot; Susanna L. Lamers; Tessa LaFleur                                                                                                                                                                                                                            |
| EPI_ISL_780670,<br>EPI_ISL_1753844,<br>EPI_ISL_1801149                                                                                                                                                                                                                                                                                                                                                                                                                                                                                                                                                                                                                                                                                                                                                                                                                                            | Ohio Department of Health Laboratory                                                                                                                                                                                | Ohio Department of Health Laboratory                                                                                                                                                                        | Allison Black; Brent Lee; Caitlin McDonnell; Eric Brandt; Erica Leasure; Glen McGillivray; Heather Blankenship; Holmes; Jade Mowery; Jennifer; Kelsey Flore; Keoni Omura; Kirtana Ramadugu; Quanta Brown; Stephanie Mccracken; Tyler Payne; and Tammy Bannerman                                                                                                                           |
| EPI_ISL_491969                                                                                                                                                                                                                                                                                                                                                                                                                                                                                                                                                                                                                                                                                                                                                                                                                                                                                    | Oman-NIC                                                                                                                                                                                                            | Department of Microbiology and Immunology-SQUH                                                                                                                                                              | Abdulla Balkhair; Ahlam Al-Amri; Aisha Al-Amri; Aisha Al-Busaidi; Amina Al-Jardani; Fahad Zadjali; Fatma BaAlawi; Hamida Al-Barwani; Hanan Al-kind; Intisar Al-Shukri; Khulood Al-Mammary; Mohammed Al-Tobi; Samiha Al-Kharusi; Samira Al-Maruqi; Zeyana Al-Dahmani                                                                                                                       |
| EPI_ISL_1533289,<br>EPI_ISL_1532290                                                                                                                                                                                                                                                                                                                                                                                                                                                                                                                                                                                                                                                                                                                                                                                                                                                               | Oman-National Influenza Center                                                                                                                                                                                      | Biotechnology & OMICs Laboratory                                                                                                                                                                            | Abdul Latif Khan; Ahmed Al Harrasi; Ahmed Al-Rawahi; Ahmed N Al-Rawahi; Aisha Al-Amri; Amal Al-Maani; Amina Al-Jardani.; Bilal Hussain; Fahad Al-Balushi; Hanan Al-Kindi; Intisar Al-Shukri; Laila Al-Balushi; Sajjad Asaf; Samira Al-Mahruqi; Samiya Al-Zadjali; Saqib Bilal                                                                                                             |

|                                                                                                                                                                                                                                                                                                                                                                                                                                                       |                                                                                                        |                                                                                                                                           |                                                                                                                                                                                                                                                                                                                                                                                                                                                                                                                                                                                                                                                                                                                                                                                                                                                                                                                                                                                                                                                                                                                                                                                 |
|-------------------------------------------------------------------------------------------------------------------------------------------------------------------------------------------------------------------------------------------------------------------------------------------------------------------------------------------------------------------------------------------------------------------------------------------------------|--------------------------------------------------------------------------------------------------------|-------------------------------------------------------------------------------------------------------------------------------------------|---------------------------------------------------------------------------------------------------------------------------------------------------------------------------------------------------------------------------------------------------------------------------------------------------------------------------------------------------------------------------------------------------------------------------------------------------------------------------------------------------------------------------------------------------------------------------------------------------------------------------------------------------------------------------------------------------------------------------------------------------------------------------------------------------------------------------------------------------------------------------------------------------------------------------------------------------------------------------------------------------------------------------------------------------------------------------------------------------------------------------------------------------------------------------------|
| EPI_ISL_1739628,<br>EPI_ISL_1739794,<br>EPI_ISL_1740169,<br>EPI_ISL_1740205,<br>EPI_ISL_1740269                                                                                                                                                                                                                                                                                                                                                       | Ontario's COVID-19 Genomics Rapid Response Coalition                                                   | McMaster University                                                                                                                       | Ahmed Draia; Allison McGeer; Ana Cabrera; Andrew G. McArthur; Angel Li; Emily Panousis; Hooman Derakhshani; Jalees Nasir; Kuganya Nirmalarajah; Marek Smieja; Michael Surette; Patryk Aftanas; Samira Mubareka                                                                                                                                                                                                                                                                                                                                                                                                                                                                                                                                                                                                                                                                                                                                                                                                                                                                                                                                                                  |
| EPI_ISL_2158567,<br>EPI_ISL_3216794,<br>EPI_ISL_3262793,<br>EPI_ISL_3262799,<br>EPI_ISL_3262802,<br>EPI_ISL_3262856                                                                                                                                                                                                                                                                                                                                   | Oregon State Public Health Laboratory                                                                  | Oregon State Public Health Laboratory                                                                                                     | Eugene Yeboah; John Fontana and Shane Sevey; Laura Tsaknaridis; Rafia Razzaque; Vanda Makris                                                                                                                                                                                                                                                                                                                                                                                                                                                                                                                                                                                                                                                                                                                                                                                                                                                                                                                                                                                                                                                                                    |
| EPI_ISL_841679, EPI_ISL_951742, EPI_ISL_951955, EPI_ISL_1310271, EPI_ISL_1387731, EPI_ISL_1387766, EPI_ISL_1387801, EPI_ISL_1388535, EPI_ISL_1476361, EPI_ISL_1546666, EPI_ISL_1546809, EPI_ISL_1546857, EPI_ISL_1546910, EPI_ISL_1730636, EPI_ISL_3180461, EPI_ISL_3180472, EPI_ISL_3181461, EPI_ISL_3181475, EPI_ISL_3181551, EPI_ISL_3181643, EPI_ISL_3181645, EPI_ISL_3181649, EPI_ISL_3181708, EPI_ISL_3181882, EPI_ISL_3181920, EPI_ISL_3182584 | see above                                                                                              | Originating lab: Wales Specialist Virology Centre Sequencing lab: Pathogen Genomics Unit                                                  | Public Health Wales Microbiology Cardiff Wales Specialist Virology Centre<br>Alec Birchley; Alexander Adams; Amy Gaskin; Angela Marchbank; Bree Gatica-Wilcox; Catherine Moore; Jason Coombes; Joanne Watkins; Joel Southgate; Johnathan Evans; Laura Gifford; Lauren Gilbert; Lee Graham; Malorie Perry; Matthew Bull; Nicole Pacchiarini; Sally Corden; Sara Kumziene-Summerhayes; Sara Rey; Sarah Taylor; Simon Cottrell; Sophie Jones; Tom Connor                                                                                                                                                                                                                                                                                                                                                                                                                                                                                                                                                                                                                                                                                                                           |
| EPI_ISL_417483                                                                                                                                                                                                                                                                                                                                                                                                                                        | Oslo University Hospital, Department of Medical Microbiology                                           | Norwegian Institute of Public Health                                                                                                      | Hilde Elshaug; Kamilla Heddeland Instefjord; Karoline Bragstad; Kathrine Stene-Johansen; Olav Hungnes                                                                                                                                                                                                                                                                                                                                                                                                                                                                                                                                                                                                                                                                                                                                                                                                                                                                                                                                                                                                                                                                           |
| EPI_ISL_417488                                                                                                                                                                                                                                                                                                                                                                                                                                        | Oslo University Hospital, Department of Medical Microbiology                                           | Norwegian Institute of Public Health, Department of Virology                                                                              | Hilde Elshaug; Kamilla Heddeland Instefjord; Karoline Bragstad; Kathrine Stene-Johansen; Olav Hungnes                                                                                                                                                                                                                                                                                                                                                                                                                                                                                                                                                                                                                                                                                                                                                                                                                                                                                                                                                                                                                                                                           |
| EPI_ISL_3242264,<br>EPI_ISL_3243248,<br>EPI_ISL_3243329,<br>EPI_ISL_3243350                                                                                                                                                                                                                                                                                                                                                                           | Osmania Medical College                                                                                | CDFD                                                                                                                                      | Ashwin Dalal; Asmita Gupta; Divya Vashisht; Murali Bashyam; Nagamani Kammlil; Reelina Basu; Vinay Donipadi                                                                                                                                                                                                                                                                                                                                                                                                                                                                                                                                                                                                                                                                                                                                                                                                                                                                                                                                                                                                                                                                      |
| EPI_ISL_788948                                                                                                                                                                                                                                                                                                                                                                                                                                        | Ospedale "Di Venere"                                                                                   | Beaconlab (Bioinformatics, Evolution and Comparative Genomics lab), Dept of Biosciences, University on Milan                              | Chiara M; Iacobellis M; Manzari C; Parisi A; Pesole G; Piluscio R; d'Avenia M                                                                                                                                                                                                                                                                                                                                                                                                                                                                                                                                                                                                                                                                                                                                                                                                                                                                                                                                                                                                                                                                                                   |
| EPI_ISL_528924                                                                                                                                                                                                                                                                                                                                                                                                                                        | Ospedale "Giuseppe Mazzini"-Teramo                                                                     | Istituto Zooprofilattico Sperimentale dell'Abruzzo e Molise "G.Caporale"                                                                  | Ancora M; Cammà C; Curini V; Di Domenico M; Di Pasquale A; Lorusso A; Mangone I; Marcacci M; Puglia I; Rinaldi A; Savini G.                                                                                                                                                                                                                                                                                                                                                                                                                                                                                                                                                                                                                                                                                                                                                                                                                                                                                                                                                                                                                                                     |
| EPI_ISL_529020                                                                                                                                                                                                                                                                                                                                                                                                                                        | Ospedale Civile S. Liberatore-Atri                                                                     | Istituto Zooprofilattico Sperimentale dell'Abruzzo e Molise "G.Caporale"                                                                  | Ancora M; Cammà C; Curini V; Di Domenico M; Di Pasquale A; Lorusso A; Mangone I; Marcacci M; Puglia I; Rinaldi A; Savini G.                                                                                                                                                                                                                                                                                                                                                                                                                                                                                                                                                                                                                                                                                                                                                                                                                                                                                                                                                                                                                                                     |
| EPI_ISL_2264884                                                                                                                                                                                                                                                                                                                                                                                                                                       | Ospedale Generale Regionale F. Miulli                                                                  | Istituto Zooprofilattico Sperimentale della Puglia e della Basilicata                                                                     | Bianco A.; Capozzi L.; Ceci E.; Del Sambro L.; Parisi A.; Simone D.                                                                                                                                                                                                                                                                                                                                                                                                                                                                                                                                                                                                                                                                                                                                                                                                                                                                                                                                                                                                                                                                                                             |
| EPI_ISL_1824133<br>EPI_ISL_1825100<br>EPI_ISL_3032301                                                                                                                                                                                                                                                                                                                                                                                                 | Ospedale San Camillo De Lellis<br>Ospedale Sandro Pertini ASL Roma2<br>Ospedale Santa Caterina Novella | INMI Lazzaro Spallanzani IRCCS<br>INMI Lazzaro Spallanzani IRCCS<br>Istituto Zooprofilattico Sperimentale della Puglia e della Basilicata | A De Luca; CEM Gruber; E Sperandio; F Santini; G Bonfiglio; G Orlandi; L Casertano; M Rueca<br>B Bartolini; CEM Gruber; F De Nicola; F Messina; G Cappiello; M Pallocca; O Butera; S Romano<br>Bianco A.; Bruno A. R.; Capozzi L.; Del Sambro L.; Difato L.; Parisi A.; Simone D.                                                                                                                                                                                                                                                                                                                                                                                                                                                                                                                                                                                                                                                                                                                                                                                                                                                                                               |
| EPI_ISL_2820746                                                                                                                                                                                                                                                                                                                                                                                                                                       | Ospedale Santissima Annunziata                                                                         | Istituto Zooprofilattico Sperimentale della Puglia e della Basilicata                                                                     | Bianco A.; Capozzi L.; Del Sambro L.; Difato L.; Giannico A; Manzari C.; Parisi A.; Pesole G.; Ridolfi D.; Simone D.; Tampoia M.                                                                                                                                                                                                                                                                                                                                                                                                                                                                                                                                                                                                                                                                                                                                                                                                                                                                                                                                                                                                                                                |
| EPI_ISL_2264793                                                                                                                                                                                                                                                                                                                                                                                                                                       | Ospedale di Venere                                                                                     | Istituto Zooprofilattico Sperimentale della Puglia e della Basilicata                                                                     | Bianco A.; Capozzi L.; Del Sambro L.; Giannico A.; Iacobellis M.; Parisi A.; Ridolfi D.; Simone D.                                                                                                                                                                                                                                                                                                                                                                                                                                                                                                                                                                                                                                                                                                                                                                                                                                                                                                                                                                                                                                                                              |
| EPI_ISL_1323985, EPI_ISL_1547680, EPI_ISL_1578844, EPI_ISL_1820502, EPI_ISL_2225991, EPI_ISL_3229926, EPI_ISL_3229927, EPI_ISL_3232618                                                                                                                                                                                                                                                                                                                | see above                                                                                              | Ostfold Hospital Trust - Kalnes, Centre for Laboratory Medicine, Section for gene technology and infection serology                       | Norwegian Institute of Public Health, Department of Virology<br>Atiya R Ali; Debech Nadia; Engebretsen Serina Beate; Garcia Llorente Ignacio; Hilde Elshaug; Hilde Vollan; Jon Bråte; Kamilla Heddeland Instefjord; Karoline Bragstad; Kathrine Stene-Johansen; Line Victoria Moen; Marie Paulsen Madsen; Olav Hungnes; Pedersen Benedikte Nevjen; Rasmus Riis Kopperud                                                                                                                                                                                                                                                                                                                                                                                                                                                                                                                                                                                                                                                                                                                                                                                                         |
| EPI_ISL_5945861,<br>EPI_ISL_6699181,<br>EPI_ISL_6885257                                                                                                                                                                                                                                                                                                                                                                                               | Outre Mer                                                                                              | National Reference Center for Viruses of Respiratory Infections, Institut Pasteur, Paris                                                  | Angela Brisebarre; Camille Capel; Christophe Malabat; Corinne Maufrais; Etienne Simon-Lorière; François Nestour; Frédéric Lemoine; Julien Fumey; Laurence Fagour; Louise Lefrançois; Marion Barbet; Maud Vanpeene; Méline Bizard; Slim El Khiri; Sylvie Behillil; Sylvie Van der Werf; Vincent Enouf                                                                                                                                                                                                                                                                                                                                                                                                                                                                                                                                                                                                                                                                                                                                                                                                                                                                            |
| EPI_ISL_1035934                                                                                                                                                                                                                                                                                                                                                                                                                                       | Outre Mer CH de Mayotte                                                                                | National Reference Center for Viruses of Respiratory Infections, Institut Pasteur, Paris                                                  | Angela Brisebarre; Camille Capel; Combe Patrice; Etienne Simon-Lorière; Marion Barbet; Maud Vanpeene; Méline Bizard; Sylvie Behillil; Sylvie van der Werf; Vincent Enouf                                                                                                                                                                                                                                                                                                                                                                                                                                                                                                                                                                                                                                                                                                                                                                                                                                                                                                                                                                                                        |
| EPI_ISL_995395, EPI_ISL_1001400, EPI_ISL_1001443, EPI_ISL_1096234, EPI_ISL_1416981, EPI_ISL_3219521, EPI_ISL_3245809, EPI_ISL_3392634, EPI_ISL_3979702, EPI_ISL_3979720, EPI_ISL_4171376, EPI_ISL_4171393, EPI_ISL_4171479, EPI_ISL_5054145, EPI_ISL_5314198                                                                                                                                                                                          | see above                                                                                              | Outre mer                                                                                                                                 | National Reference Center for Viruses of Respiratory Infections, Institut Pasteur, Paris<br>Angela Brisebarre; Camille Capel; Christophe Malabat; Combe Patrice; Corinne Maufrais; Dominique Rousset; Etienne Simon-Lorière; François Nestour; Frédéric Lemoine; GréGoire Potiron; Hub de Bioinformatique et Biostatistique; Hub de bioinformatique et Biostatistique; Julien Fumey; Louise Lefrançois; Marion Barbet; Maud Vanpeene; Méline Bizard; Rousset (Guy) Dominique; Rousset Dominique; Slim El Khiri; Slim El-Khiri; Sylvie Behillil; Sylvie Van der Werf; Sylvie van der Werf; Vincent Enouf                                                                                                                                                                                                                                                                                                                                                                                                                                                                                                                                                                         |
| EPI_ISL_628510, EPI_ISL_628598, EPI_ISL_628629, EPI_ISL_652976, EPI_ISL_950957, EPI_ISL_1309737, EPI_ISL_1475655, EPI_ISL_1475706, EPI_ISL_1833035, EPI_ISL_1833037, EPI_ISL_2127635                                                                                                                                                                                                                                                                  | see above                                                                                              | Oxford Viromics, NDM, University of Oxford; Oxford University Hospitals; Basingstoke and North Hampshire Hospital                         | COVID-19 Genomics UK (COG-UK) Consortium<br>Alex Mobbs; Amy Trebes; Anita Justice; Catrin Moore; Christophe Fraser; David Bonsall; David Buck; Emma Wise; George Macintyre; Jessica Lynch; John Todd; Mariateresa de Cesare; Matilde Mori; Monique Andersson; Nathan Moore; Nick Cortes; Robert Shaw; Stephen Kidd; Tanya Golubchik; Timothy Peto                                                                                                                                                                                                                                                                                                                                                                                                                                                                                                                                                                                                                                                                                                                                                                                                                               |
| EPI_ISL_1040043                                                                                                                                                                                                                                                                                                                                                                                                                                       | PCR Laboratory, The First Affiliated Hospital of Zhengzhou University, Zhengzhou, Henan, China         | PCR Laboratory, The First Affiliated Hospital of Zhengzhou University, Zhengzhou, Henan, China                                            | Guanglin Cui; Hao Guo; Junhu Wan; Lei Zheng; Li Sun; Lijuan Rong; Meijing Long; Shijie Zhang; Ting Sun; Xianchun Meng; Xiangbo Huang                                                                                                                                                                                                                                                                                                                                                                                                                                                                                                                                                                                                                                                                                                                                                                                                                                                                                                                                                                                                                                            |
| EPI_ISL_5015511<br>EPI_ISL_492626,<br>EPI_ISL_501601                                                                                                                                                                                                                                                                                                                                                                                                  | PGR USLD Chênes Blancs 1er ét<br>PHE South West Regional Laboratory, National Infection Service        | CHU Pontchaillou<br>Wellcome Sanger Institute for the COVID-19 Genomics UK (COG-UK) consortium                                            | DE TAYRAC Marie; DENOUAL Florent; ETCHEVERRY Amandine; FEBREAU Christine; GALIBERT Marie Dominique; GROHLIER Claire; JAGLINE Steven; PRONIER Charlotte; QUENET Benjamin; SASSI Mohamed; THIBAUT Vincent<br>Barry Vipond; Cordella Langford; David K. Jackson; Dominic Kwiatkowski; Dr Peter Muir; Ewan Harrison; Hannah Pymont; Ian Johnston; John Sillito on behalf of the Wellcome Sanger Institute COVID-19 Surveillance Team ( <a href="http://www.sanger.ac.uk/covid-team">http://www.sanger.ac.uk/covid-team</a> ); Rich Hopes; Roberto Amato; Sonia Goncalves; Stephanie Hutchings; and Alex Alderton                                                                                                                                                                                                                                                                                                                                                                                                                                                                                                                                                                    |
| EPI_ISL_4101593                                                                                                                                                                                                                                                                                                                                                                                                                                       | PKD Jempol                                                                                             | UKM Medical Molecular Biology Institute (UMBI)                                                                                            | Nur Alyaa Afifah Md Shahri                                                                                                                                                                                                                                                                                                                                                                                                                                                                                                                                                                                                                                                                                                                                                                                                                                                                                                                                                                                                                                                                                                                                                      |
| EPI_ISL_5428875                                                                                                                                                                                                                                                                                                                                                                                                                                       | PKD TAMPIN                                                                                             | UKM Medical Molecular Biology Institute (UMBI)                                                                                            | Mira Farzana binti Mohamad Mokhtar                                                                                                                                                                                                                                                                                                                                                                                                                                                                                                                                                                                                                                                                                                                                                                                                                                                                                                                                                                                                                                                                                                                                              |
| EPI_ISL_3733988, EPI_ISL_3990089, EPI_ISL_4273325, EPI_ISL_5740533, EPI_ISL_5740565, EPI_ISL_5864544, EPI_ISL_6641427, EPI_ISL_6641437, EPI_ISL_6641512                                                                                                                                                                                                                                                                                               | see above                                                                                              | PO AVEZZANO - U.O.C. Laboratorio Analisi                                                                                                  | Ancora M; Calistri P; Cammà C; Caporale M; Curini V; Delli Compagni E; Di Domenico M; Di Lollo Valeria; Di Pasquale A; Lorusso A; Mangone I; Marcacci M; Puglia I; Rinaldi A; Savini G; Scialabba S                                                                                                                                                                                                                                                                                                                                                                                                                                                                                                                                                                                                                                                                                                                                                                                                                                                                                                                                                                             |
| EPI_ISL_1795086                                                                                                                                                                                                                                                                                                                                                                                                                                       | PRONTO SOCORRO MUNICIPAL TAMBAU                                                                        | Instituto Butantan / ESALQ- Piracicaba                                                                                                    | Antonio Jorge Martins; Bianca Cechetto Carlos; Mendelics; Bibiana Santos; Claudia Renata dos Santos Barros; David Schlesinger. Hemocentro Ribeirão Preto: Simone Kashima; Debora Botequiu Moretti. Centro de Genómica Funcional da ESALQ: Luiz Lehmann Coutinho; Dimas Tadeu Covas; Elaine Cristina Marqueze; Elaine Vieira dos Santos; Elisângela Chicaroni Mattos; Erika Freitas; Evandra Strazza Rodrigues; Felipe Allan da Silva da Costa; Flavia Aburjaile; Guilherme Targino Valente; Heidge Fukumasu. USP-Botucatu: Rejane Maria Tommasini Grotto; Instituto Butantan: Alexander Roberto Precioso; Jayme A. Souza-Neto; Jessica Cristina Chagas Lesbon; José Salvatore Leister Patané; João Paulo Kitajima; Luiz Carlos Junior de Alcantara; Maria Carolina Elias; Marta Giovanetti; Patricia Akemi Assato; Rafael dos Santos Bezerra; Raquel de Lello Rocha Campos Cassano. NGS Soluções Genômicas: Pilar Drummond Sampaio Corrêa Mariani. FZEA-USP Pirassununga: Mirele Daiana Poleti; Raul Machado Neto; Ricardo Augusto Brassalotti; Ricardo Haddad; Rodrigo Tocantins Calado.; Sandra Coccuzzo Sampaio; Svetoslav Nanev Slavov; Vagner Fonseca; Vincent Louis Viata |
| EPI_ISL_7314556                                                                                                                                                                                                                                                                                                                                                                                                                                       | PRVKP FKUI                                                                                             | National Institute of Health Research and Development                                                                                     | Arie Ardiansyah Nugraha; Fajar Nur; Hana Aparsi Pawestri; Hartanti Dian Ikawati; Kartika Dewi Puspa; Krisna Pangesti; Nelly Puspandanti; Sunbangkit; Sulistiyohadi; Vivi Setiawaty                                                                                                                                                                                                                                                                                                                                                                                                                                                                                                                                                                                                                                                                                                                                                                                                                                                                                                                                                                                              |
| EPI_ISL_1533706                                                                                                                                                                                                                                                                                                                                                                                                                                       | PS Mun Santana Lauro Ribas Braga                                                                       | Instituto Adolfo Lutz, Interdisciplinary Procedures Center, Strategic Laboratory                                                          | Cao Vinicius Dias Lopes; Claudia Regina Gonçalves; Claudio Tavares Sacchi; Érica Valessa Ramos Gomes; Karoline Rodrigues Campos; Leonardo Jose Tadeu de Araujo                                                                                                                                                                                                                                                                                                                                                                                                                                                                                                                                                                                                                                                                                                                                                                                                                                                                                                                                                                                                                  |
| EPI_ISL_5248556,<br>EPI_ISL_5248609,<br>EPI_ISL_5502813,<br>EPI_ISL_6640827                                                                                                                                                                                                                                                                                                                                                                           | Palapye Primary Hospital Laboratory                                                                    | Botswana Harvard HIV Reference Laboratory                                                                                                 | Boitumelo J. L Zuze; Boitumelo Zuze; Botshelo Radibe; Dorcas Maruapula; Joseph Makhema; Keoratlhe Ntshambiwa; Kgomoiso Morusi; Legodile Koepile; Letsibogo Gaoralwe; Mosepele Mosepele; Mphaphi B. Mbulawa; Ontlametse T. Bareng; Pamela Smith-Lawrence; Roger Shapiro; Sefetogi Ramaologa; Shahin Lockman; Sikhulle Moyo; Simani Gaseitsiwe; Thela Tefelo; Thongbotho Mphoyakgosi; Wonderful T. Choga                                                                                                                                                                                                                                                                                                                                                                                                                                                                                                                                                                                                                                                                                                                                                                          |



|                                                                                                                                                                                                                                                                                                                                                                                                                                                                                                                                                                                                                                                                                                                                                                                                                                                                                                                                                                                                                                                                                                                                                                                                                                                                                                                                                                                                                                                                                                                                                                                                                                                                                                                                                                                                                                                                                                                                                                                                                                                                                                                                                                                                                                                                                                                                                                                                                                                                                                                                                                                                                                                                                                                                                                                                                                                                                                                                                                                                                                                                                                                                                                                                                                                                                                                                                                                                                                                                                                                                                                                                                                                                                                                                                                                                                                                                                                                                                                                                                                                                                                                                                           |                                                                                                                         |                                                                                                                                   |                                                                                                                                                                                                                                                                                                                                                                                                                                                                                                                                                                                                                                                                                                                                       |
|-----------------------------------------------------------------------------------------------------------------------------------------------------------------------------------------------------------------------------------------------------------------------------------------------------------------------------------------------------------------------------------------------------------------------------------------------------------------------------------------------------------------------------------------------------------------------------------------------------------------------------------------------------------------------------------------------------------------------------------------------------------------------------------------------------------------------------------------------------------------------------------------------------------------------------------------------------------------------------------------------------------------------------------------------------------------------------------------------------------------------------------------------------------------------------------------------------------------------------------------------------------------------------------------------------------------------------------------------------------------------------------------------------------------------------------------------------------------------------------------------------------------------------------------------------------------------------------------------------------------------------------------------------------------------------------------------------------------------------------------------------------------------------------------------------------------------------------------------------------------------------------------------------------------------------------------------------------------------------------------------------------------------------------------------------------------------------------------------------------------------------------------------------------------------------------------------------------------------------------------------------------------------------------------------------------------------------------------------------------------------------------------------------------------------------------------------------------------------------------------------------------------------------------------------------------------------------------------------------------------------------------------------------------------------------------------------------------------------------------------------------------------------------------------------------------------------------------------------------------------------------------------------------------------------------------------------------------------------------------------------------------------------------------------------------------------------------------------------------------------------------------------------------------------------------------------------------------------------------------------------------------------------------------------------------------------------------------------------------------------------------------------------------------------------------------------------------------------------------------------------------------------------------------------------------------------------------------------------------------------------------------------------------------------------------------------------------------------------------------------------------------------------------------------------------------------------------------------------------------------------------------------------------------------------------------------------------------------------------------------------------------------------------------------------------------------------------------------------------------------------------------------------------------|-------------------------------------------------------------------------------------------------------------------------|-----------------------------------------------------------------------------------------------------------------------------------|---------------------------------------------------------------------------------------------------------------------------------------------------------------------------------------------------------------------------------------------------------------------------------------------------------------------------------------------------------------------------------------------------------------------------------------------------------------------------------------------------------------------------------------------------------------------------------------------------------------------------------------------------------------------------------------------------------------------------------------|
| EPI_ISL_1254658,<br>EPI_ISL_1627350,<br>EPI_ISL_2264814,<br>EPI_ISL_2466277,<br>EPI_ISL_2820739                                                                                                                                                                                                                                                                                                                                                                                                                                                                                                                                                                                                                                                                                                                                                                                                                                                                                                                                                                                                                                                                                                                                                                                                                                                                                                                                                                                                                                                                                                                                                                                                                                                                                                                                                                                                                                                                                                                                                                                                                                                                                                                                                                                                                                                                                                                                                                                                                                                                                                                                                                                                                                                                                                                                                                                                                                                                                                                                                                                                                                                                                                                                                                                                                                                                                                                                                                                                                                                                                                                                                                                                                                                                                                                                                                                                                                                                                                                                                                                                                                                           | Presidio di Brindisi Di Summa - Perrino                                                                                 | Molise "G. Caporale"<br>Istituto Zooprofilattico<br>Sperimentale della Puglia e della<br>Basilicata                               | Bianco A.; Capozzi L.; Del Sambro L.; Difato L.; Giannico A.; Manzari C.; Parisi A.; Pennuzzi G.; Pesole G.; Ridolfi D.; Santoro A.; Simone D.                                                                                                                                                                                                                                                                                                                                                                                                                                                                                                                                                                                        |
| EPI_ISL_418259                                                                                                                                                                                                                                                                                                                                                                                                                                                                                                                                                                                                                                                                                                                                                                                                                                                                                                                                                                                                                                                                                                                                                                                                                                                                                                                                                                                                                                                                                                                                                                                                                                                                                                                                                                                                                                                                                                                                                                                                                                                                                                                                                                                                                                                                                                                                                                                                                                                                                                                                                                                                                                                                                                                                                                                                                                                                                                                                                                                                                                                                                                                                                                                                                                                                                                                                                                                                                                                                                                                                                                                                                                                                                                                                                                                                                                                                                                                                                                                                                                                                                                                                            | Presidio ospedaliero "Santo Spirito"                                                                                    | Istituto Zooprofilattico<br>Sperimentale dell'Abruzzo e<br>Molise "G. Caporale"                                                   | Ancora M.; Cammà C.; Curini V.; Di Domenico M.; Di Pasquale A.; Lorusso A.; Mangone I.; Marcacci M.; Puglia I.; Rinaldi A.; Savini G.                                                                                                                                                                                                                                                                                                                                                                                                                                                                                                                                                                                                 |
| EPI_ISL_417064<br>EPI_ISL_1533703                                                                                                                                                                                                                                                                                                                                                                                                                                                                                                                                                                                                                                                                                                                                                                                                                                                                                                                                                                                                                                                                                                                                                                                                                                                                                                                                                                                                                                                                                                                                                                                                                                                                                                                                                                                                                                                                                                                                                                                                                                                                                                                                                                                                                                                                                                                                                                                                                                                                                                                                                                                                                                                                                                                                                                                                                                                                                                                                                                                                                                                                                                                                                                                                                                                                                                                                                                                                                                                                                                                                                                                                                                                                                                                                                                                                                                                                                                                                                                                                                                                                                                                         | Prince of Wales Hospital<br>Pronto Atendimento Sao Jose                                                                 | Hong Kong Department of Health<br>Istituto Adolfo Lutz,<br>Interdisciplinary Procedures<br>Center, Strategic Laboratory           | Alan K.L. Tsang; Dominic N.C. Tsang; Edman T.K. Lam; Peter C.W. Yip; Rickjason C.W. Chan<br>Caio Vinicius Dias Lopes; Claudia Regina Gonçalves; Claudio Tavares Sacchi; Erica Valessa Ramos Gomes; Karoline Rodrigues Campos; Leonardo Jose Tadeu de Araujo                                                                                                                                                                                                                                                                                                                                                                                                                                                                           |
| EPI_ISL_523959                                                                                                                                                                                                                                                                                                                                                                                                                                                                                                                                                                                                                                                                                                                                                                                                                                                                                                                                                                                                                                                                                                                                                                                                                                                                                                                                                                                                                                                                                                                                                                                                                                                                                                                                                                                                                                                                                                                                                                                                                                                                                                                                                                                                                                                                                                                                                                                                                                                                                                                                                                                                                                                                                                                                                                                                                                                                                                                                                                                                                                                                                                                                                                                                                                                                                                                                                                                                                                                                                                                                                                                                                                                                                                                                                                                                                                                                                                                                                                                                                                                                                                                                            | Pronto Socorro Municipal de Perus                                                                                       | Istituto Adolfo Lutz,<br>Interdisciplinary Procedures<br>Center, Strategic Laboratory                                             | Claudia Regina Gonçalves; Claudio Tavares Sacchi; Erica Valessa Ramos Gomes                                                                                                                                                                                                                                                                                                                                                                                                                                                                                                                                                                                                                                                           |
| EPI_ISL_404895                                                                                                                                                                                                                                                                                                                                                                                                                                                                                                                                                                                                                                                                                                                                                                                                                                                                                                                                                                                                                                                                                                                                                                                                                                                                                                                                                                                                                                                                                                                                                                                                                                                                                                                                                                                                                                                                                                                                                                                                                                                                                                                                                                                                                                                                                                                                                                                                                                                                                                                                                                                                                                                                                                                                                                                                                                                                                                                                                                                                                                                                                                                                                                                                                                                                                                                                                                                                                                                                                                                                                                                                                                                                                                                                                                                                                                                                                                                                                                                                                                                                                                                                            | Providence Regional Medical Center                                                                                      | Division of Viral Diseases,<br>Centers for Disease Control and<br>Prevention                                                      | C.R.; Gerber, Li, Y.; Lindstrom, S.; Lu, X.; Paden; Queen, K.; S.I.; Tao, Y.; Tong, S.; Zhang, J.                                                                                                                                                                                                                                                                                                                                                                                                                                                                                                                                                                                                                                     |
| EPI_ISL_1524136, EPI_ISL_1526627, EPI_ISL_1647617, EPI_ISL_1647644, EPI_ISL_1647770, EPI_ISL_1749532, EPI_ISL_3185812, EPI_ISL_3231292                                                                                                                                                                                                                                                                                                                                                                                                                                                                                                                                                                                                                                                                                                                                                                                                                                                                                                                                                                                                                                                                                                                                                                                                                                                                                                                                                                                                                                                                                                                                                                                                                                                                                                                                                                                                                                                                                                                                                                                                                                                                                                                                                                                                                                                                                                                                                                                                                                                                                                                                                                                                                                                                                                                                                                                                                                                                                                                                                                                                                                                                                                                                                                                                                                                                                                                                                                                                                                                                                                                                                                                                                                                                                                                                                                                                                                                                                                                                                                                                                    | Public Health Authority of the Slovak Republic                                                                          | Laboratory of Genomics and<br>Bioinformatics, Comenius<br>University Science Park                                                 | Anna Gicová; Diana Rusháková; Jakub Styk; Jaroslav Budiš; Miroslav Böhmer; Tatiana Sedláčková; Tomáš Szemes                                                                                                                                                                                                                                                                                                                                                                                                                                                                                                                                                                                                                           |
| EPI_ISL_416522                                                                                                                                                                                                                                                                                                                                                                                                                                                                                                                                                                                                                                                                                                                                                                                                                                                                                                                                                                                                                                                                                                                                                                                                                                                                                                                                                                                                                                                                                                                                                                                                                                                                                                                                                                                                                                                                                                                                                                                                                                                                                                                                                                                                                                                                                                                                                                                                                                                                                                                                                                                                                                                                                                                                                                                                                                                                                                                                                                                                                                                                                                                                                                                                                                                                                                                                                                                                                                                                                                                                                                                                                                                                                                                                                                                                                                                                                                                                                                                                                                                                                                                                            | Public Health Laboratory, Saudi CDC                                                                                     | Public Health Laboratory, Saudi<br>CDC                                                                                            | A; Albarrag                                                                                                                                                                                                                                                                                                                                                                                                                                                                                                                                                                                                                                                                                                                           |
| EPI_ISL_413015                                                                                                                                                                                                                                                                                                                                                                                                                                                                                                                                                                                                                                                                                                                                                                                                                                                                                                                                                                                                                                                                                                                                                                                                                                                                                                                                                                                                                                                                                                                                                                                                                                                                                                                                                                                                                                                                                                                                                                                                                                                                                                                                                                                                                                                                                                                                                                                                                                                                                                                                                                                                                                                                                                                                                                                                                                                                                                                                                                                                                                                                                                                                                                                                                                                                                                                                                                                                                                                                                                                                                                                                                                                                                                                                                                                                                                                                                                                                                                                                                                                                                                                                            | Public Health Ontario Laboratory                                                                                        | National Microbiology Laboratory                                                                                                  | Adrian Zetner; Anna Majer; Darryl Falzarano; Erika Landry; Gerdts Volker; Grace Seo; Guillaume Poliquin; Jocelyne Lew; Jonathan Gubbay; Matthew Gilmour; Morag Graham; Natalie Knox; Nathalie Bastien; Philip Mabon; Rob Kozak; Samira Mubareka; Shari Tyson; Stephanie Booth; Timothy Booth; Tom Graefenhan; Yan Li                                                                                                                                                                                                                                                                                                                                                                                                                  |
| EPI_ISL_2196170,<br>EPI_ISL_2615496,<br>EPI_ISL_2615564                                                                                                                                                                                                                                                                                                                                                                                                                                                                                                                                                                                                                                                                                                                                                                                                                                                                                                                                                                                                                                                                                                                                                                                                                                                                                                                                                                                                                                                                                                                                                                                                                                                                                                                                                                                                                                                                                                                                                                                                                                                                                                                                                                                                                                                                                                                                                                                                                                                                                                                                                                                                                                                                                                                                                                                                                                                                                                                                                                                                                                                                                                                                                                                                                                                                                                                                                                                                                                                                                                                                                                                                                                                                                                                                                                                                                                                                                                                                                                                                                                                                                                   | QLabs                                                                                                                   | WVU and Marshall University<br>Combined Genomics Core<br>Facilities                                                               | James Denvir; Peter Perrotta; Peter Stoilov; Ryan Percifield; Wesley Kimble                                                                                                                                                                                                                                                                                                                                                                                                                                                                                                                                                                                                                                                           |
| EPI_ISL_704911, EPI_ISL_1308333, EPI_ISL_1386996, EPI_ISL_1474216, EPI_ISL_1832938, EPI_ISL_3288997, EPI_ISL_3289028, EPI_ISL_3289112, EPI_ISL_3289140, EPI_ISL_3289208, EPI_ISL_3289211, EPI_ISL_3289271, EPI_ISL_3289301, EPI_ISL_3289322, EPI_ISL_3289361, EPI_ISL_3289381, EPI_ISL_3289433, EPI_ISL_3289507                                                                                                                                                                                                                                                                                                                                                                                                                                                                                                                                                                                                                                                                                                                                                                                                                                                                                                                                                                                                                                                                                                                                                                                                                                                                                                                                                                                                                                                                                                                                                                                                                                                                                                                                                                                                                                                                                                                                                                                                                                                                                                                                                                                                                                                                                                                                                                                                                                                                                                                                                                                                                                                                                                                                                                                                                                                                                                                                                                                                                                                                                                                                                                                                                                                                                                                                                                                                                                                                                                                                                                                                                                                                                                                                                                                                                                           | Quadram Institute Bioscience                                                                                            | COVID-19 Genomics UK (COG-<br>UK) Consortium                                                                                      | Alexander J Trotter; Alison E. Mather; Alp Aydin; Ana P. Tedim; Anastasia Kolyva; Andrew Bell; Andrew J. Page; Christopher Jeanes; Claire Stuart; Dave J. Baker; Ebenezer Foster-Nyarko; Gemma L. Kay; John Wain; Justin O'Grady; Justin O'Grady; Leonardo de Oliveira Martins; Lewis G. Spurgin; Lindsay Coupland; Lizzie Meadows; Luke Bedford; Maria Diaz; Mark Webber; Martin Lott; Muhammed Yasir; Nabli-Fareed Alkhan; Ngozi Elumogo; Nicholas M. Thomson; Rachael Stanley; Rachel Gilroy; Reensh Prakash; Rose K Davidson; Samir Derwisevic; Samuel Bloomfield; Sophie J. Prosele; Steven Rudder; Thanh Le-Viet                                                                                                                |
| EPI_ISL_2188251                                                                                                                                                                                                                                                                                                                                                                                                                                                                                                                                                                                                                                                                                                                                                                                                                                                                                                                                                                                                                                                                                                                                                                                                                                                                                                                                                                                                                                                                                                                                                                                                                                                                                                                                                                                                                                                                                                                                                                                                                                                                                                                                                                                                                                                                                                                                                                                                                                                                                                                                                                                                                                                                                                                                                                                                                                                                                                                                                                                                                                                                                                                                                                                                                                                                                                                                                                                                                                                                                                                                                                                                                                                                                                                                                                                                                                                                                                                                                                                                                                                                                                                                           | Qualimed Hospital Sta. Rosa                                                                                             | Philippine Genome Center                                                                                                          | Alethea R. de Guzman; Anna Ong-Lim; Arianne A. Zamora; Asia Louisa U. Chong; Benedict A. Maralit; Candice Francheska B. Tambaoan; Carlo M. Lapid; Celia Carlos; Devon Ray Pacial; Edsel Maurice Salvaña; El King D. Morado; Elcid Aaron R. Panglinan; Eva Maria Cutungco-de la Paz; Francis A. Tablizo; Irish Coleen A. Asin; Jaime C. Montoya; Jan Michael C. Yap; Jo-Hannah S. Llamas; John O. Wong; Joshua Gregor A. Dizon; Juan Antonio R. Magalang; Karol Sophia Agape R. Padilla; Kenneth M. Kim; Kris P. Punayan; Marc Edsel C. Ayes; Marc Jerrone R. Castro; Maria Rosario Singh-Vergere and Cynthia P. Saloma; Maria Sofia L. Yangzon; Marissa Alejandria; Razel Nikka M. Hao; Rianna Patricia S. Cruz; Sheila Mae M. Araiza |
| EPI_ISL_577168,<br>EPI_ISL_1177496                                                                                                                                                                                                                                                                                                                                                                                                                                                                                                                                                                                                                                                                                                                                                                                                                                                                                                                                                                                                                                                                                                                                                                                                                                                                                                                                                                                                                                                                                                                                                                                                                                                                                                                                                                                                                                                                                                                                                                                                                                                                                                                                                                                                                                                                                                                                                                                                                                                                                                                                                                                                                                                                                                                                                                                                                                                                                                                                                                                                                                                                                                                                                                                                                                                                                                                                                                                                                                                                                                                                                                                                                                                                                                                                                                                                                                                                                                                                                                                                                                                                                                                        | Queens Medical Centre, Clinical Microbiology Department / DeepSeq Nottingham                                            | COVID-19 Genomics UK (COG-<br>UK) Consortium                                                                                      | Christopher Moore; Emily Park; Fei Sang; Gemma Clark; Hannah Howson-Wells; Jack Hill; Jayasree Dee; Johnny Debebe; Jonathan Ball; Joseph Chappell; Manjinder Khakh; Matthew Carlisle; Matthew Loose; Michelle M Lister; Nadine Holmes; Patricia McCleure; Theocharis Tselendis; Timothy Byaruhanga; Vicki M Fleming; Victoria Wright; Wendy Smith                                                                                                                                                                                                                                                                                                                                                                                     |
| EPI_ISL_571481,<br>EPI_ISL_571668,<br>EPI_ISL_604194,<br>EPI_ISL_604784,<br>EPI_ISL_605008,<br>EPI_ISL_915212                                                                                                                                                                                                                                                                                                                                                                                                                                                                                                                                                                                                                                                                                                                                                                                                                                                                                                                                                                                                                                                                                                                                                                                                                                                                                                                                                                                                                                                                                                                                                                                                                                                                                                                                                                                                                                                                                                                                                                                                                                                                                                                                                                                                                                                                                                                                                                                                                                                                                                                                                                                                                                                                                                                                                                                                                                                                                                                                                                                                                                                                                                                                                                                                                                                                                                                                                                                                                                                                                                                                                                                                                                                                                                                                                                                                                                                                                                                                                                                                                                             | Quest Diagnostics                                                                                                       | Quest Diagnostics                                                                                                                 | Anderson, B.; Bernstein; D.F.; Gerasimova, A.; Grover, D.; Hua, M.; I.A.; K.E.; Kagan; L.E.; Lacabwan, F.; Liu Y.; Livingston; Owen, R.; Perez, A.; R.M.; Rosenthal; S.H.; Shalhout; Shlyakhter; Tanpaiboon, P.                                                                                                                                                                                                                                                                                                                                                                                                                                                                                                                       |
| EPI_ISL_1193840, EPI_ISL_1253145, EPI_ISL_1254514, EPI_ISL_1265922, EPI_ISL_1266155, EPI_ISL_1266853, EPI_ISL_1266936, EPI_ISL_1267111, EPI_ISL_1290991, EPI_ISL_1291501, EPI_ISL_1297640, EPI_ISL_1314557, EPI_ISL_1335990, EPI_ISL_1391620, EPI_ISL_1392368, EPI_ISL_1422477, EPI_ISL_1422886, EPI_ISL_1444591, EPI_ISL_1444703, EPI_ISL_1460777, EPI_ISL_1479933, EPI_ISL_1480763, EPI_ISL_1480879, EPI_ISL_1480966, EPI_ISL_1492017, EPI_ISL_1493712, EPI_ISL_1552314, EPI_ISL_1552734, EPI_ISL_1552956, EPI_ISL_1559495, EPI_ISL_1582051, EPI_ISL_1582138, EPI_ISL_1621886, EPI_ISL_1621893, EPI_ISL_1648194, EPI_ISL_1648199, EPI_ISL_1648451, EPI_ISL_1648466, EPI_ISL_1648517, EPI_ISL_1648576, EPI_ISL_1648672, EPI_ISL_1648766, EPI_ISL_1648780, EPI_ISL_1668701, EPI_ISL_1694949, EPI_ISL_1702171, EPI_ISL_1702700, EPI_ISL_1737960, EPI_ISL_1738117, EPI_ISL_1738255, EPI_ISL_1738259, EPI_ISL_1753293, EPI_ISL_1762041, EPI_ISL_1798121, EPI_ISL_1798135, EPI_ISL_1818169, EPI_ISL_1818348, EPI_ISL_1818465, EPI_ISL_1834238, EPI_ISL_1834413, EPI_ISL_1840472, EPI_ISL_1924374, EPI_ISL_1924758, EPI_ISL_1990052, EPI_ISL_1990294, EPI_ISL_1990454, EPI_ISL_2047063, EPI_ISL_2047196, EPI_ISL_2047248, EPI_ISL_2143009, EPI_ISL_2143244, EPI_ISL_2143267, EPI_ISL_2187253, EPI_ISL_3212699, EPI_ISL_3212702, EPI_ISL_3212791, EPI_ISL_3212822, EPI_ISL_3212891, EPI_ISL_3212932, EPI_ISL_3213006, EPI_ISL_3213184, EPI_ISL_3213210, EPI_ISL_3213320, EPI_ISL_3213466, EPI_ISL_3213548, EPI_ISL_3213622, EPI_ISL_3213778, EPI_ISL_3213854, EPI_ISL_3213872, EPI_ISL_3213927, EPI_ISL_3214026, EPI_ISL_3214244, EPI_ISL_3214313, EPI_ISL_3214357, EPI_ISL_4367756, EPI_ISL_4367776, EPI_ISL_4367804, EPI_ISL_4367850, EPI_ISL_4367885, EPI_ISL_4367898, EPI_ISL_4367939, EPI_ISL_4367990, EPI_ISL_4368170, EPI_ISL_4368242, EPI_ISL_4368258, EPI_ISL_4368269, EPI_ISL_4368340, EPI_ISL_4368404, EPI_ISL_4368457, EPI_ISL_4368462, EPI_ISL_4368483, EPI_ISL_4368490, EPI_ISL_4368531, EPI_ISL_4368543, EPI_ISL_4368544, EPI_ISL_4368548, EPI_ISL_4368737, EPI_ISL_4368792, EPI_ISL_4368832, EPI_ISL_4368844, EPI_ISL_4368904, EPI_ISL_4369001, EPI_ISL_4369047, EPI_ISL_4369085, EPI_ISL_4369103, EPI_ISL_4369150, EPI_ISL_4369162, EPI_ISL_4369175, EPI_ISL_4369196, EPI_ISL_4369268, EPI_ISL_4369531, EPI_ISL_4369539, EPI_ISL_4369598, EPI_ISL_4369816, EPI_ISL_4369912, EPI_ISL_4369913, EPI_ISL_4369981, EPI_ISL_4370015, EPI_ISL_4370130, EPI_ISL_4370211, EPI_ISL_4370330, EPI_ISL_4370352, EPI_ISL_4370359, EPI_ISL_4370442, EPI_ISL_4370466, EPI_ISL_4370761, EPI_ISL_4370765, EPI_ISL_4370776, EPI_ISL_4370781, EPI_ISL_4370782, EPI_ISL_4370841, EPI_ISL_4370842, EPI_ISL_4370849, EPI_ISL_4370978, EPI_ISL_4370999, EPI_ISL_4371035, EPI_ISL_4371110, EPI_ISL_4371115, EPI_ISL_4371129, EPI_ISL_4371135, EPI_ISL_4371136, EPI_ISL_4371176, EPI_ISL_4371177, EPI_ISL_4371211, EPI_ISL_4371226, EPI_ISL_4371241, EPI_ISL_4371315, EPI_ISL_4371318, EPI_ISL_4371366, EPI_ISL_4371367, EPI_ISL_4371387, EPI_ISL_4371393, EPI_ISL_4371397, EPI_ISL_4371427, EPI_ISL_4371541, EPI_ISL_4371615, EPI_ISL_4371629, EPI_ISL_4371668, EPI_ISL_4371681, EPI_ISL_4371700, EPI_ISL_4371723, EPI_ISL_4371794, EPI_ISL_4371804, EPI_ISL_4371814, EPI_ISL_4371912, EPI_ISL_4371923, EPI_ISL_4371925, EPI_ISL_4372109, EPI_ISL_4372113, EPI_ISL_4372115, EPI_ISL_4372123, EPI_ISL_4372215, EPI_ISL_4372288, EPI_ISL_4372323, EPI_ISL_4372325, EPI_ISL_4372329, EPI_ISL_4372431, EPI_ISL_4372436, EPI_ISL_4372498, EPI_ISL_4372573, EPI_ISL_4372597, EPI_ISL_4372648, EPI_ISL_4372694, EPI_ISL_4372702, EPI_ISL_4372763, EPI_ISL_4372895, EPI_ISL_4372912, EPI_ISL_4372990, EPI_ISL_4372993, EPI_ISL_4372998, EPI_ISL_4373027, EPI_ISL_4373050, EPI_ISL_4373052, EPI_ISL_4373058, EPI_ISL_4373080, EPI_ISL_4373128, EPI_ISL_4373138, EPI_ISL_4373145, EPI_ISL_4373181, EPI_ISL_4373195, EPI_ISL_4373227, EPI_ISL_4373376, EPI_ISL_4373463, EPI_ISL_4373486, EPI_ISL_4373629, EPI_ISL_4373751, EPI_ISL_4373849, EPI_ISL_4373897, EPI_ISL_4373920, EPI_ISL_4373970, EPI_ISL_4374014, EPI_ISL_4374059, EPI_ISL_4374130, EPI_ISL_4374138, EPI_ISL_4374145 |                                                                                                                         |                                                                                                                                   |                                                                                                                                                                                                                                                                                                                                                                                                                                                                                                                                                                                                                                                                                                                                       |
| see above                                                                                                                                                                                                                                                                                                                                                                                                                                                                                                                                                                                                                                                                                                                                                                                                                                                                                                                                                                                                                                                                                                                                                                                                                                                                                                                                                                                                                                                                                                                                                                                                                                                                                                                                                                                                                                                                                                                                                                                                                                                                                                                                                                                                                                                                                                                                                                                                                                                                                                                                                                                                                                                                                                                                                                                                                                                                                                                                                                                                                                                                                                                                                                                                                                                                                                                                                                                                                                                                                                                                                                                                                                                                                                                                                                                                                                                                                                                                                                                                                                                                                                                                                 | Quest Diagnostics Incorporated                                                                                          | Centers for Disease Control and<br>Prevention Division of Viral<br>Diseases, Pathogen Discovery                                   | A. Gerasimova; A. Perez; Adrian Paskey; B. Anderson; Ben L. Rambo-Martin; Benjamin Rambo-Martin; Christopher Gulvick; Clinton Paden; Clinton R. Paden; Dakota Howard; Darlene Wagner; Dhvani Batra; Duncan MacCannell; Erisa Suia; F. Lacabwan; I. A. Shlyakhter; I. Shlyakhter; Jason Caravas; K. Livingston; Kara Moser; Kristine Lacey; L. Bernstein; L. E. Bernstein; M. Hua; Matthew Schmerer; P. Tanpaiboon; Peter Cook; Peter W. Cook; R. Kagan; R. M. Kagan; R. Owen; R. Rolando; R. V. Rolando; S. H. Rosenthal; S. Rosenthal; Scott Sammons; Shatavia Morrison; Suxiang Tong; Tymecia Kendall; Victoria Caban Figueroa; Y. Liu; Yvette Unoarumhi                                                                            |
| EPI_ISL_1086613,<br>EPI_ISL_1088153,<br>EPI_ISL_1113788,<br>EPI_ISL_1114581,<br>EPI_ISL_1139322                                                                                                                                                                                                                                                                                                                                                                                                                                                                                                                                                                                                                                                                                                                                                                                                                                                                                                                                                                                                                                                                                                                                                                                                                                                                                                                                                                                                                                                                                                                                                                                                                                                                                                                                                                                                                                                                                                                                                                                                                                                                                                                                                                                                                                                                                                                                                                                                                                                                                                                                                                                                                                                                                                                                                                                                                                                                                                                                                                                                                                                                                                                                                                                                                                                                                                                                                                                                                                                                                                                                                                                                                                                                                                                                                                                                                                                                                                                                                                                                                                                           | Quest Diagnostics Incorporated                                                                                          | Respiratory Viruses Branch,<br>Division of Viral Diseases,<br>Centers for Disease Control and<br>Prevention                       | A. Gerasimova; A. Perez; B. Anderson; Ben L. Rambo-Martin; Clinton R. Paden; Dakota Howard; Dhvani Batra; Duncan MacCannell; F. Lacabwan; I. A. Shlyakhter; K.E. Livingston; L.E. Bernstein; M. Hua; P. Tanpaiboon; Peter W. Cook; R. M. Kagan; R. Owen; R. V. Rolando; S. H. Rosenthal; Suxiang Tong; Y. Liu                                                                                                                                                                                                                                                                                                                                                                                                                         |
| EPI_ISL_415641,<br>EPI_ISL_415642,<br>EPI_ISL_416478,<br>EPI_ISL_416480,<br>EPI_ISL_416482                                                                                                                                                                                                                                                                                                                                                                                                                                                                                                                                                                                                                                                                                                                                                                                                                                                                                                                                                                                                                                                                                                                                                                                                                                                                                                                                                                                                                                                                                                                                                                                                                                                                                                                                                                                                                                                                                                                                                                                                                                                                                                                                                                                                                                                                                                                                                                                                                                                                                                                                                                                                                                                                                                                                                                                                                                                                                                                                                                                                                                                                                                                                                                                                                                                                                                                                                                                                                                                                                                                                                                                                                                                                                                                                                                                                                                                                                                                                                                                                                                                                | R. G. Lugar Center for Public Health Research, National Center for Disease Control and Public Health (NCDC) of Georgia. | R. G. Lugar Center for Public<br>Health Research, National<br>Center for Disease Control and Public<br>Health (NCDC) of Georgia.  | Adam Kotorashvili; Amiran Gamkrelidze; Ana Papkiauri; Ann Machabishvili; Anna Kasradze; Davit Tsaguria; Ekaterine Khmaladze; Ekaterine Zangaladze; Ekaterine Zhghenti; Giorgi Tomashvili; Gvantsa Brachveli; Gvantsa Chanturia; Irma Burjanadze; Ketevan Sidamondze; Khatuna Zakhshvili; Lela Sabadze; Lela Urushadze; Magda Dgebuadze; Maia Alkhashvili; Mari Gavashelidze; Mariam Zakalashvili; Marine Murtvaladze; Meri Pantsulaia; Nato Kotaria; Nino Berishvili; Paata Imnadze; Roena Sukhiani; Tamar Jashiani; Tata Imnadze; Tea Tevdoradze                                                                                                                                                                                     |
| EPI_ISL_1628706<br>EPI_ISL_1528472                                                                                                                                                                                                                                                                                                                                                                                                                                                                                                                                                                                                                                                                                                                                                                                                                                                                                                                                                                                                                                                                                                                                                                                                                                                                                                                                                                                                                                                                                                                                                                                                                                                                                                                                                                                                                                                                                                                                                                                                                                                                                                                                                                                                                                                                                                                                                                                                                                                                                                                                                                                                                                                                                                                                                                                                                                                                                                                                                                                                                                                                                                                                                                                                                                                                                                                                                                                                                                                                                                                                                                                                                                                                                                                                                                                                                                                                                                                                                                                                                                                                                                                        | REUNILAB<br>RI State Health Laboratories                                                                                | UMR PIMIT<br>Centers for Disease Control and<br>Prevention Division of Viral<br>Diseases, Pathogen Discovery                      | Dr Camille Lebarbenchon; Dr David A Wilkinson; Dr Patrick Mavingui; Magali Turpin<br>Alison Lauffer Halpin; Ben L. Rambo-Martin; Clinton R. Paden; Dakota Howard; Darlene Wagner; Dave Wentworth; Dhvani Batra; Jasmine Padilla; Justin Lee; Katie Dillon; Krista Queen; Kristen Knipe; Kristine Lacey; Mark Burroughs; Matthew Schmerer; Mili Sheth; Peter Cook; Sam Shepard; Sarah Nobis; Shoshona Le; Suxiang Tong; Vivien Dunion; Yvette Unoarumhi                                                                                                                                                                                                                                                                                |
| EPI_ISL_413575                                                                                                                                                                                                                                                                                                                                                                                                                                                                                                                                                                                                                                                                                                                                                                                                                                                                                                                                                                                                                                                                                                                                                                                                                                                                                                                                                                                                                                                                                                                                                                                                                                                                                                                                                                                                                                                                                                                                                                                                                                                                                                                                                                                                                                                                                                                                                                                                                                                                                                                                                                                                                                                                                                                                                                                                                                                                                                                                                                                                                                                                                                                                                                                                                                                                                                                                                                                                                                                                                                                                                                                                                                                                                                                                                                                                                                                                                                                                                                                                                                                                                                                                            | RIVM                                                                                                                    | Erasmus Medical Center                                                                                                            | Anne van der Linden; Anнемiek van der Eijk; Aura Timen; Bas Oude Munnink; Claudia Schapendonk; Corien Swaan; Corine Geurtsvankessel; David Nieuwenhuijse; Irina Chestakova; Jeroen van Kampen; Jolanda Voermans; Madelief Mollers; Manon Haverkate; Marion Koopmans; Mark Pronk; Mart Stein; Pascal Lexmond; Reina Sikkema; Richard Molenkamp; Sandra Kengne Kamea Mobou; on behalf of the Dutch national COVID-19 response team.                                                                                                                                                                                                                                                                                                     |
| EPI_ISL_3280907                                                                                                                                                                                                                                                                                                                                                                                                                                                                                                                                                                                                                                                                                                                                                                                                                                                                                                                                                                                                                                                                                                                                                                                                                                                                                                                                                                                                                                                                                                                                                                                                                                                                                                                                                                                                                                                                                                                                                                                                                                                                                                                                                                                                                                                                                                                                                                                                                                                                                                                                                                                                                                                                                                                                                                                                                                                                                                                                                                                                                                                                                                                                                                                                                                                                                                                                                                                                                                                                                                                                                                                                                                                                                                                                                                                                                                                                                                                                                                                                                                                                                                                                           | RM2/A.U. Tor Vergata                                                                                                    | National Institute for Infectious<br>Diseases (INMI) L. Spallanzani<br>I.R.C.C.S                                                  | A Di Caro; B Bartolini; CEM Gruber; E Giombini; F Messina; F Santini; G Bonfiglio; M Rucca; MR Capobianchi; O Butera                                                                                                                                                                                                                                                                                                                                                                                                                                                                                                                                                                                                                  |
| EPI_ISL_3237023                                                                                                                                                                                                                                                                                                                                                                                                                                                                                                                                                                                                                                                                                                                                                                                                                                                                                                                                                                                                                                                                                                                                                                                                                                                                                                                                                                                                                                                                                                                                                                                                                                                                                                                                                                                                                                                                                                                                                                                                                                                                                                                                                                                                                                                                                                                                                                                                                                                                                                                                                                                                                                                                                                                                                                                                                                                                                                                                                                                                                                                                                                                                                                                                                                                                                                                                                                                                                                                                                                                                                                                                                                                                                                                                                                                                                                                                                                                                                                                                                                                                                                                                           | ROB FERREIRA LABORATORY                                                                                                 | National Institute for<br>Communicable Diseases of the<br>National Health Laboratory<br>Service                                   | Amoako DG; Bhiman JN; Everat J; Ismail A; Mahlangu B; Mnguni A; Mohale T; Ntuli N; Scheepers C                                                                                                                                                                                                                                                                                                                                                                                                                                                                                                                                                                                                                                        |
| EPI_ISL_4164665                                                                                                                                                                                                                                                                                                                                                                                                                                                                                                                                                                                                                                                                                                                                                                                                                                                                                                                                                                                                                                                                                                                                                                                                                                                                                                                                                                                                                                                                                                                                                                                                                                                                                                                                                                                                                                                                                                                                                                                                                                                                                                                                                                                                                                                                                                                                                                                                                                                                                                                                                                                                                                                                                                                                                                                                                                                                                                                                                                                                                                                                                                                                                                                                                                                                                                                                                                                                                                                                                                                                                                                                                                                                                                                                                                                                                                                                                                                                                                                                                                                                                                                                           | RS Bhakti Mulia                                                                                                         | Eijkman Institute for Molecular<br>Biology, National Research and<br>Innovation Agency                                            | Amin Soebandrio; Edison Johar; Frilasita A Yudhaputri; Hidayat Trimarsanto; Iskandar Adnan; Khin Saw Myint; Lidwina Priliani; Lydia V. Panggalo; Muhammad Rezki Rasyak; Safarina G Malik; Sukma Oktavianthi; Willy Agustine                                                                                                                                                                                                                                                                                                                                                                                                                                                                                                           |
| EPI_ISL_2614690                                                                                                                                                                                                                                                                                                                                                                                                                                                                                                                                                                                                                                                                                                                                                                                                                                                                                                                                                                                                                                                                                                                                                                                                                                                                                                                                                                                                                                                                                                                                                                                                                                                                                                                                                                                                                                                                                                                                                                                                                                                                                                                                                                                                                                                                                                                                                                                                                                                                                                                                                                                                                                                                                                                                                                                                                                                                                                                                                                                                                                                                                                                                                                                                                                                                                                                                                                                                                                                                                                                                                                                                                                                                                                                                                                                                                                                                                                                                                                                                                                                                                                                                           | RS Harapan Bunda                                                                                                        | Eijkman Institute for Molecular<br>Biology, National Research and<br>Innovation Agency                                            | Amin Soebandrio; Edison Johar; Frilasita A Yudhaputri; Hidayat Trimarsanto; Iskandar Adnan; Khin Saw Myint; Lidwina Priliani; Lydia V. Panggalo; Muhammad Rezki Rasyak; Safarina G Malik; Sukma Oktavianthi; Willy Agustine                                                                                                                                                                                                                                                                                                                                                                                                                                                                                                           |
| EPI_ISL_4417846                                                                                                                                                                                                                                                                                                                                                                                                                                                                                                                                                                                                                                                                                                                                                                                                                                                                                                                                                                                                                                                                                                                                                                                                                                                                                                                                                                                                                                                                                                                                                                                                                                                                                                                                                                                                                                                                                                                                                                                                                                                                                                                                                                                                                                                                                                                                                                                                                                                                                                                                                                                                                                                                                                                                                                                                                                                                                                                                                                                                                                                                                                                                                                                                                                                                                                                                                                                                                                                                                                                                                                                                                                                                                                                                                                                                                                                                                                                                                                                                                                                                                                                                           | RS Karitas / EIKMAN OXFORD CLINICAL RESEARCH UNIT                                                                       | Genomik Solidaritas Indonesia<br>Laboratorium                                                                                     | Annisa Muthiah Sukiman; Anuraj Shankar; Ariel Pradipta; Bonifacius; Carissa Sintca Wijaya; Claus Bough; Decy Subekti; Dhahlia Agustina Cahyono; Dian Tri Wahyudi; Gracia Felias Enos Korompis; Himawan Masuyahi; Kevin Baird; Louisa Markus; Meutia Ayuputeri Kumaher; Ragh Hamers; Suwarti                                                                                                                                                                                                                                                                                                                                                                                                                                           |
| EPI_ISL_1622373                                                                                                                                                                                                                                                                                                                                                                                                                                                                                                                                                                                                                                                                                                                                                                                                                                                                                                                                                                                                                                                                                                                                                                                                                                                                                                                                                                                                                                                                                                                                                                                                                                                                                                                                                                                                                                                                                                                                                                                                                                                                                                                                                                                                                                                                                                                                                                                                                                                                                                                                                                                                                                                                                                                                                                                                                                                                                                                                                                                                                                                                                                                                                                                                                                                                                                                                                                                                                                                                                                                                                                                                                                                                                                                                                                                                                                                                                                                                                                                                                                                                                                                                           | RS Mary Cileungsi Hijau                                                                                                 | Eijkman Institute for Molecular<br>Biology, Ministry of Research and<br>Technology/National Agency for<br>Research and Innovation | Amin Soebandrio; Edison Johar; Frilasita A Yudhaputri; Hidayat Trimarsanto; Iskandar Adnan; Khin Saw Myint; Lydia V. Panggalo; Muhammad Rezki Rasyak; Safarina G Malik; Sukma Oktavianthi; Willy Agustine                                                                                                                                                                                                                                                                                                                                                                                                                                                                                                                             |
| EPI_ISL_1284273                                                                                                                                                                                                                                                                                                                                                                                                                                                                                                                                                                                                                                                                                                                                                                                                                                                                                                                                                                                                                                                                                                                                                                                                                                                                                                                                                                                                                                                                                                                                                                                                                                                                                                                                                                                                                                                                                                                                                                                                                                                                                                                                                                                                                                                                                                                                                                                                                                                                                                                                                                                                                                                                                                                                                                                                                                                                                                                                                                                                                                                                                                                                                                                                                                                                                                                                                                                                                                                                                                                                                                                                                                                                                                                                                                                                                                                                                                                                                                                                                                                                                                                                           | RS Mediorssa Cikarang                                                                                                   | Eijkman Institute for Molecular<br>Biology, Ministry of Research and                                                              | Amin Soebandrio; Edison Johar; Frilasita A Yudhaputri; Hidayat Trimarsanto; Iskandar Adnan; Khin Saw Myint; Lydia V. Panggalo; Safarina G Malik; Sukma Oktavianthi; Willy Agustine                                                                                                                                                                                                                                                                                                                                                                                                                                                                                                                                                    |

|                                                                                                                                                                                                                                                                                                                                                                                                                                                                                                                                                                                                                                                                                                                                                                                                                                                                                                                                                                                                                                                                                                                                                                                                                                                                                                                                                                                                                                |                                                                           |                                                                                                                                                                                |                                                                                                                                                                                                                                                                                                                                                                                                                                                                                                                                                                                                                                                                                                               |
|--------------------------------------------------------------------------------------------------------------------------------------------------------------------------------------------------------------------------------------------------------------------------------------------------------------------------------------------------------------------------------------------------------------------------------------------------------------------------------------------------------------------------------------------------------------------------------------------------------------------------------------------------------------------------------------------------------------------------------------------------------------------------------------------------------------------------------------------------------------------------------------------------------------------------------------------------------------------------------------------------------------------------------------------------------------------------------------------------------------------------------------------------------------------------------------------------------------------------------------------------------------------------------------------------------------------------------------------------------------------------------------------------------------------------------|---------------------------------------------------------------------------|--------------------------------------------------------------------------------------------------------------------------------------------------------------------------------|---------------------------------------------------------------------------------------------------------------------------------------------------------------------------------------------------------------------------------------------------------------------------------------------------------------------------------------------------------------------------------------------------------------------------------------------------------------------------------------------------------------------------------------------------------------------------------------------------------------------------------------------------------------------------------------------------------------|
| EPI_ISL_2364617                                                                                                                                                                                                                                                                                                                                                                                                                                                                                                                                                                                                                                                                                                                                                                                                                                                                                                                                                                                                                                                                                                                                                                                                                                                                                                                                                                                                                | RS Mitra Keluarga Gading Serpong                                          | Technology/National Agency for Research and Innovation                                                                                                                         | Amin Soebandrio; Edison Johar; Frilasita A Yudhaputri; Hidayat Trimarsanto; Iskandar Adnan; Khin Saw Myint; Lidwina Priliani; Lydia V. Panggalo; Muhammad Rezki Rasyak; Safarina G Malik; Sukma Oktavianthi; Willy Agustine                                                                                                                                                                                                                                                                                                                                                                                                                                                                                   |
| EPI_ISL_2364581                                                                                                                                                                                                                                                                                                                                                                                                                                                                                                                                                                                                                                                                                                                                                                                                                                                                                                                                                                                                                                                                                                                                                                                                                                                                                                                                                                                                                | RS Sentra Medika Cikarang                                                 | Eijkman Institute for Molecular Biology, National Agency for Research and Innovation                                                                                           | Amin Soebandrio; Edison Johar; Frilasita A Yudhaputri; Hidayat Trimarsanto; Iskandar Adnan; Khin Saw Myint; Lidwina Priliani; Lydia V. Panggalo; Muhammad Rezki Rasyak; Safarina G Malik; Sukma Oktavianthi; Willy Agustine                                                                                                                                                                                                                                                                                                                                                                                                                                                                                   |
| EPI_ISL_2614647                                                                                                                                                                                                                                                                                                                                                                                                                                                                                                                                                                                                                                                                                                                                                                                                                                                                                                                                                                                                                                                                                                                                                                                                                                                                                                                                                                                                                | RS Sumber Waras                                                           | Eijkman Institute for Molecular Biology, National Research and Innovation Agency                                                                                               | Amin Soebandrio; Edison Johar; Frilasita A Yudhaputri; Hidayat Trimarsanto; Iskandar Adnan; Khin Saw Myint; Lidwina Priliani; Lydia V. Panggalo; Muhammad Rezki Rasyak; Safarina G Malik; Sukma Oktavianthi; Willy Agustine                                                                                                                                                                                                                                                                                                                                                                                                                                                                                   |
| EPI_ISL_529019                                                                                                                                                                                                                                                                                                                                                                                                                                                                                                                                                                                                                                                                                                                                                                                                                                                                                                                                                                                                                                                                                                                                                                                                                                                                                                                                                                                                                 | RSA/RP Villa San Giovanni - Gruppo Edos                                   | Istituto Zooprofilattico Sperimentale dell'Abruzzo e Molise "G. Caporale"                                                                                                      | Ancora M; Cammà C; Curini V; Di Domenico M; Di Pasquale A; Lorusso A; Mangone I; Marcacci M; Puglia I; Rinaldi A; Savini G.                                                                                                                                                                                                                                                                                                                                                                                                                                                                                                                                                                                   |
| EPI_ISL_4508299, EPI_ISL_5441755, EPI_ISL_947284                                                                                                                                                                                                                                                                                                                                                                                                                                                                                                                                                                                                                                                                                                                                                                                                                                                                                                                                                                                                                                                                                                                                                                                                                                                                                                                                                                               | RSDC Wisma Atlet Kemayoran                                                | National Institute of Health Research and Development                                                                                                                          | Arie Ardiansyah Nugraha; Fajar Nur Sulistiyohadi; Hana Apsari Pawestri; Hartanti Dian Ikawati; Kartika Dewi Puspa; Krisna Pangesti; Nelly Puspandari; Subangkit; Triyani Soekarso; Vivi Setiawaty                                                                                                                                                                                                                                                                                                                                                                                                                                                                                                             |
| EPI_ISL_574609                                                                                                                                                                                                                                                                                                                                                                                                                                                                                                                                                                                                                                                                                                                                                                                                                                                                                                                                                                                                                                                                                                                                                                                                                                                                                                                                                                                                                 | RS/JPD Harapan Kita                                                       | Eijkman Institute for Molecular Biology, Ministry of Research and Technology/National Agency for Research and Innovation                                                       | Amin Soebandrio; Edison Johar; Frilasita A Yudhaputri; Hidayat Trimarsanto; Iskandar A Adnan; Khin Saw Myint; Lidwina Priliani; Lydia V. Panggalo; Muhammad Rezki Rasyak; Safarina G Malik; Sukma Oktavianthi; Willy Agustine                                                                                                                                                                                                                                                                                                                                                                                                                                                                                 |
| EPI_ISL_3216532                                                                                                                                                                                                                                                                                                                                                                                                                                                                                                                                                                                                                                                                                                                                                                                                                                                                                                                                                                                                                                                                                                                                                                                                                                                                                                                                                                                                                | RSUD Arifin Achmad                                                        | National Institute of Health Research and Development                                                                                                                          | Arie Ardiansyah Nugraha; Fajar Nur Sulistiyohadi; Fajri Marindra; Hana Apsari Pawestri; Hartanti Dian Ikawati; Kartika Dewi Puspa; Krisna Pangesti; Nelly Puspandari; Subangkit; Triyani Soekarso; Vivi Setiawaty                                                                                                                                                                                                                                                                                                                                                                                                                                                                                             |
| EPI_ISL_3216565                                                                                                                                                                                                                                                                                                                                                                                                                                                                                                                                                                                                                                                                                                                                                                                                                                                                                                                                                                                                                                                                                                                                                                                                                                                                                                                                                                                                                | RSUD Brebes                                                               | National Institute of Health Research and Development                                                                                                                          | Arie Ardiansyah Nugraha; Fajar Nur Sulistiyohadi; Hana Apsari Pawestri; Hartanti Dian Ikawati; Kartika Dewi Puspa; Krisna Pangesti; Nelly Puspandari; Subangkit; Triyani Soekarso; Vivi Setiawaty                                                                                                                                                                                                                                                                                                                                                                                                                                                                                                             |
| EPI_ISL_2013046                                                                                                                                                                                                                                                                                                                                                                                                                                                                                                                                                                                                                                                                                                                                                                                                                                                                                                                                                                                                                                                                                                                                                                                                                                                                                                                                                                                                                | RSUD Cileungsi                                                            | Eijkman Institute for Molecular Biology, National Agency for Research and Innovation                                                                                           | Amin Soebandrio; Edison Johar; Frilasita A Yudhaputri; Hidayat Trimarsanto; Iskandar Adnan; Khin Saw Myint; Lydia V. Panggalo; Muhammad Rezki Rasyak; Safarina G Malik; Sukma Oktavianthi; Willy Agustine                                                                                                                                                                                                                                                                                                                                                                                                                                                                                                     |
| EPI_ISL_2101302                                                                                                                                                                                                                                                                                                                                                                                                                                                                                                                                                                                                                                                                                                                                                                                                                                                                                                                                                                                                                                                                                                                                                                                                                                                                                                                                                                                                                | RSUD Mangusada                                                            | Eijkman Institute for Molecular Biology, National Agency for Research and Innovation; Molecular Biology Laboratory, Faculty Medicine and Health Sciences, Warmadewa University | Amin Soebandrio; Edison Johar; Eryl Sintya; Frilasita A Yudhaputri; Hidayat Trimarsanto; Ida Ayu Wayan Mahayani; Iskandar Adnan; Khin Saw Myint; Lidwina Priliani; Lydia V. Panggalo; Muhammad Rezki Rasyak; Safarina G Malik; Sri Masyeni; Sukma Oktavianthi; Willy Agustine                                                                                                                                                                                                                                                                                                                                                                                                                                 |
| EPI_ISL_3030020                                                                                                                                                                                                                                                                                                                                                                                                                                                                                                                                                                                                                                                                                                                                                                                                                                                                                                                                                                                                                                                                                                                                                                                                                                                                                                                                                                                                                | RSUD Mangusada                                                            | Eijkman Institute for Molecular Biology, National Research and Innovation Agency; Faculty Medicine and Health Sciences, Warmadewa University                                   | Amin Soebandrio; Edison Johar; Eryl Sintya; Frilasita A Yudhaputri; Hidayat Trimarsanto; Ida Ayu Wayan Mahayani; Iskandar Adnan; Khin Saw Myint; Lidwina Priliani; Lydia V. Panggalo; Muhammad Rezki Rasyak; Safarina G Malik; Sri Masyeni; Sukma Oktavianthi; Willy Agustine                                                                                                                                                                                                                                                                                                                                                                                                                                 |
| EPI_ISL_3216598                                                                                                                                                                                                                                                                                                                                                                                                                                                                                                                                                                                                                                                                                                                                                                                                                                                                                                                                                                                                                                                                                                                                                                                                                                                                                                                                                                                                                | RSUD Tarakan Jakarta                                                      | National Institute of Health Research and Development                                                                                                                          | Arie Ardiansyah Nugraha; Fajar Nur Sulistiyohadi; Hana Apsari Pawestri; Hartanti Dian Ikawati; Kartika Dewi Puspa; Krisna Pangesti; Nelly Puspandari; Subangkit; Triyani Soekarso; Vivi Setiawaty                                                                                                                                                                                                                                                                                                                                                                                                                                                                                                             |
| EPI_ISL_3216529                                                                                                                                                                                                                                                                                                                                                                                                                                                                                                                                                                                                                                                                                                                                                                                                                                                                                                                                                                                                                                                                                                                                                                                                                                                                                                                                                                                                                | RSUD dr Soehadi Prijonegoro Sragen                                        | National Institute of Health Research and Development                                                                                                                          | Arie Ardiansyah Nugraha; Fajar Nur Sulistiyohadi; Hana Apsari Pawestri; Hartanti Dian Ikawati; Kartika Dewi Puspa; Krisna Pangesti; Nelly Puspandari; Subangkit; Triyani Soekarso; Vivi Setiawaty                                                                                                                                                                                                                                                                                                                                                                                                                                                                                                             |
| EPI_ISL_3186060                                                                                                                                                                                                                                                                                                                                                                                                                                                                                                                                                                                                                                                                                                                                                                                                                                                                                                                                                                                                                                                                                                                                                                                                                                                                                                                                                                                                                | RSUP Persahabatan, Jakarta                                                | Biosafety Level-3 Laboratory, Indonesian Institute of Sciences (LIPI)                                                                                                          | Ade Andriani; Ahmad R. H. Utomo; Andhika Candra Putra; Andri Wardiana; Anggia Prasetyoputri; Asep M. Ridwanuloh; Budi Haryanto; Hariyatun; Jamal Zaini; Ratih A. Ningrum; Sugiyono Saputra; Zahrah Saniyyah                                                                                                                                                                                                                                                                                                                                                                                                                                                                                                   |
| EPI_ISL_4392633                                                                                                                                                                                                                                                                                                                                                                                                                                                                                                                                                                                                                                                                                                                                                                                                                                                                                                                                                                                                                                                                                                                                                                                                                                                                                                                                                                                                                | RSUP dr. Mohammad Hoesin/Fakultas Kedokteran Universitas Sriwijaya        | Eijkman Institute for Molecular Biology, National Agency for Research and Innovation; RSUP dr. Mohammad Hoesin/Fakultas Kedokteran Universitas Sriwijaya                       | Ahmad Ghiffari; Amin Soebandrio; Chairil Anwar; Edison Johar; Eny Rahmawati; Frilasita A Yudhaputri; Hidayat Trimarsanto; Iche Andriani Liberty; Iskandar Adnan; Jessica R Saragih; Khin Saw Myint; Lidwina Priliani; Lydia V Panggalo; Muhammad Rezki Rasyak; Nelda Aprilia Salim; Phey Liana; Safarina G Malik; Sukma Oktavianthi; Willy Agustine; Yulia Iriani                                                                                                                                                                                                                                                                                                                                             |
| EPI_ISL_4549382                                                                                                                                                                                                                                                                                                                                                                                                                                                                                                                                                                                                                                                                                                                                                                                                                                                                                                                                                                                                                                                                                                                                                                                                                                                                                                                                                                                                                | RSUP dr. Mohammad Hoesin/Fakultas Kedokteran Universitas Sriwijaya        | Eijkman Research Center for Molecular Biology, National Research and Innovation Agency; RSUP dr. Mohammad Hoesin/Fakultas Kedokteran Universitas Sriwijaya                     | Ahmad Ghiffari; Amin Soebandrio; Chairil Anwar; Edison Johar; Eny Rahmawati; Frilasita A Yudhaputri; Hidayat Trimarsanto; Iche Andriani Liberty; Iskandar Adnan; Jessica R Saragih; Khin Saw Myint; Lidwina Priliani; Lydia V Panggalo; Muhammad Rezki Rasyak; Nelda Aprilia Salim; Phey Liana; Safarina G Malik; Sukma Oktavianthi; Willy Agustine; Yulia Iriani                                                                                                                                                                                                                                                                                                                                             |
| EPI_ISL_1794769                                                                                                                                                                                                                                                                                                                                                                                                                                                                                                                                                                                                                                                                                                                                                                                                                                                                                                                                                                                                                                                                                                                                                                                                                                                                                                                                                                                                                | Rady Children's Hospital - San Diego                                      | Andersen lab at Scripps Research                                                                                                                                               | Christina Clarke; David Dimmock; Denise Malicki; Kathryn Bouic; Linda Luo; SEARCH Alliance San Diego with Nanda Radamchar; Teresa Mueller                                                                                                                                                                                                                                                                                                                                                                                                                                                                                                                                                                     |
| EPI_ISL_1046393, EPI_ISL_1046723, EPI_ISL_1057794, EPI_ISL_1115776, EPI_ISL_1116209, EPI_ISL_1190070, EPI_ISL_1243589, EPI_ISL_1264931, EPI_ISL_1265003, EPI_ISL_1344923, EPI_ISL_1376808, EPI_ISL_1389453, EPI_ISL_1411218, EPI_ISL_1451273, EPI_ISL_1467390, EPI_ISL_1484048, EPI_ISL_1520079, EPI_ISL_1544223, EPI_ISL_1631105, EPI_ISL_1631790, EPI_ISL_1631879, EPI_ISL_1631917, EPI_ISL_1631936, EPI_ISL_1698114, EPI_ISL_2122126, EPI_ISL_3286107                                                                                                                                                                                                                                                                                                                                                                                                                                                                                                                                                                                                                                                                                                                                                                                                                                                                                                                                                                       | see above                                                                 | Randox Laboratories                                                                                                                                                            | Cordelia Langford; David K. Jackson; Dominic Kwiatkowski; Ewan Harrison; Ian Johnston; Jeffrey Barrett; John Sillitoe on behalf of the Wellcome Sanger Institute COVID-19 Surveillance Team; Randox Laboratories and Alex Alderton; Roberto Amato; Sonia Goncalves                                                                                                                                                                                                                                                                                                                                                                                                                                            |
| EPI_ISL_1580781, EPI_ISL_2157710                                                                                                                                                                                                                                                                                                                                                                                                                                                                                                                                                                                                                                                                                                                                                                                                                                                                                                                                                                                                                                                                                                                                                                                                                                                                                                                                                                                               | see above                                                                 | Reditus Laboratories                                                                                                                                                           | Alexa Eichelberger; Cassy Phillips; Joshua J. Geltz; M.S.; Ph.D.; Robert M. Sgambelluri                                                                                                                                                                                                                                                                                                                                                                                                                                                                                                                                                                                                                       |
| EPI_ISL_866379, EPI_ISL_1977234                                                                                                                                                                                                                                                                                                                                                                                                                                                                                                                                                                                                                                                                                                                                                                                                                                                                                                                                                                                                                                                                                                                                                                                                                                                                                                                                                                                                | Regional Virus Laboratory, Belfast Health and Social Care Trust           | COVID-19 Genomics UK (COG-UK) Consortium                                                                                                                                       | Alison Watt; Ciara Cox; Conall McCaughey; David Simpson; Derek Fairley; James McKenna; Mairead Connor; Susan Feeney; Tanya Curran; Zoltan Molnar                                                                                                                                                                                                                                                                                                                                                                                                                                                                                                                                                              |
| EPI_ISL_482070, EPI_ISL_501036                                                                                                                                                                                                                                                                                                                                                                                                                                                                                                                                                                                                                                                                                                                                                                                                                                                                                                                                                                                                                                                                                                                                                                                                                                                                                                                                                                                                 | Regional Virus Laboratory, Belfast Health and Social Care Trust           | Wellcome Sanger Institute for the COVID-19 Genomics UK (COG-UK) consortium                                                                                                     | Alison Watt; Ciara Cox; Conall McCaughey; Cordelia Langford; David K. Jackson; David Simpson; Derek Fairley; Dominic Kwiatkowski; Ewan Harrison; Ian Johnston; James McKenna; John Sillitoe on behalf of the Wellcome Sanger Institute COVID-19 Surveillance Team ( <a href="http://www.sanger.ac.uk/covid-team">http://www.sanger.ac.uk/covid-team</a> ); Mairead Connor; Roberto Amato; Sonia Goncalves; Susan Feeney; Tanya Curran; Zoltan Molnar; and Alex Alderton                                                                                                                                                                                                                                       |
| EPI_ISL_1301864                                                                                                                                                                                                                                                                                                                                                                                                                                                                                                                                                                                                                                                                                                                                                                                                                                                                                                                                                                                                                                                                                                                                                                                                                                                                                                                                                                                                                | Research                                                                  | National Reference Center for Viruses of Respiratory Infections, Institut Pasteur, Paris                                                                                       | Angela Brisebarre; Camille Capel; Etienne Simon-Lorière; Lueruz-Ville Marianne; Louise Lefrançois; Marion Barbet; Maud Vanpeene; Méline Bizard; Sylvie Behillili; Sylvie van der Werf; Vincent Enouf                                                                                                                                                                                                                                                                                                                                                                                                                                                                                                          |
| EPI_ISL_2105337, EPI_ISL_2105461, EPI_ISL_2155124, EPI_ISL_2155296                                                                                                                                                                                                                                                                                                                                                                                                                                                                                                                                                                                                                                                                                                                                                                                                                                                                                                                                                                                                                                                                                                                                                                                                                                                                                                                                                             | Research Institute for Tropical Medicine, Inc. (RITM)                     | Philippine Genome Center                                                                                                                                                       | Alethea R. de Guzman; Anna Ong-Lim; Arianne A. Zamora; Asia Louisa U. Chong; Benedict A. Maralit; Candice Francheska B. Tambaoan; Carlo M. Lapid; Celia Carlos; Devon Ray Pacial; Edsel Maurice Salvaña; El King D. Morado; Eva Maria Cutiongco-de la Paz; Francis A. Tablizo; Irish Colean A. Asin; Jaime C. Montoya; Jan Michael C. Yap; Jo-Hannah S. Llamas; John Q. Wong; Joshua Gregor A. Dizon; Juan Antonio R. Magalang; Karol Sophia Agape R. Padilla; Kenneth M. Kim; Kris P. Punayan; Marc Edsel C. Ayes; Marc Jerrone R. Castro; Maria Rosario Singh-Vergeire and Cynthia P. Saloma; Maria Sofia L. Yangzon; Marissa Alejandria; Razel Nikka M. Hao; Rianna Patricia S. Cruz; Sheila Mae M. Araiza |
| EPI_ISL_3289873, EPI_ISL_3289920, EPI_ISL_3289925, EPI_ISL_3289963, EPI_ISL_3289995, EPI_ISL_3290042, EPI_ISL_3291158, EPI_ISL_3291160, EPI_ISL_3291165, EPI_ISL_3291225, EPI_ISL_3291322, EPI_ISL_3291336                                                                                                                                                                                                                                                                                                                                                                                                                                                                                                                                                                                                                                                                                                                                                                                                                                                                                                                                                                                                                                                                                                                                                                                                                     | see above                                                                 | Respiratory Virus Unit, Microbiology Services Colindale, Public Health England                                                                                                 | PHE Covid Sequencing Team                                                                                                                                                                                                                                                                                                                                                                                                                                                                                                                                                                                                                                                                                     |
| EPI_ISL_407073, EPI_ISL_414005, EPI_ISL_414006, EPI_ISL_414008, EPI_ISL_414009, EPI_ISL_414011, EPI_ISL_414040, EPI_ISL_414041, EPI_ISL_414042, EPI_ISL_414043, EPI_ISL_414044, EPI_ISL_414523, EPI_ISL_414525, EPI_ISL_415130, EPI_ISL_415134, EPI_ISL_415136, EPI_ISL_415141, EPI_ISL_415142, EPI_ISL_415144, EPI_ISL_415145, EPI_ISL_415146, EPI_ISL_415148, EPI_ISL_415150, EPI_ISL_417213, EPI_ISL_417217, EPI_ISL_417220, EPI_ISL_417222, EPI_ISL_417226, EPI_ISL_417228, EPI_ISL_417231, EPI_ISL_417232, EPI_ISL_417234, EPI_ISL_417236, EPI_ISL_417238, EPI_ISL_417239, EPI_ISL_417240, EPI_ISL_417248, EPI_ISL_417254, EPI_ISL_417258, EPI_ISL_417260, EPI_ISL_417266, EPI_ISL_417267, EPI_ISL_417270, EPI_ISL_417276, EPI_ISL_417279, EPI_ISL_417282, EPI_ISL_417285, EPI_ISL_417287, EPI_ISL_417290, EPI_ISL_417291, EPI_ISL_417292, EPI_ISL_417295, EPI_ISL_417297, EPI_ISL_417298, EPI_ISL_417299, EPI_ISL_418668, EPI_ISL_418669, EPI_ISL_418670, EPI_ISL_418671, EPI_ISL_418672, EPI_ISL_418673, EPI_ISL_418675, EPI_ISL_418677, EPI_ISL_418681, EPI_ISL_418684, EPI_ISL_418687, EPI_ISL_418688, EPI_ISL_418690, EPI_ISL_418691, EPI_ISL_418696, EPI_ISL_418697, EPI_ISL_418698, EPI_ISL_418700, EPI_ISL_418701, EPI_ISL_418704, EPI_ISL_418711, EPI_ISL_418716, EPI_ISL_418718, EPI_ISL_418720, EPI_ISL_418722, EPI_ISL_418729, EPI_ISL_418734, EPI_ISL_418739, EPI_ISL_418748, EPI_ISL_418756, EPI_ISL_418764 | see above                                                                 | Respiratory Virus Unit, Microbiology Services Colindale, Public Health England                                                                                                 |                                                                                                                                                                                                                                                                                                                                                                                                                                                                                                                                                                                                                                                                                                               |
| EPI_ISL_1296529                                                                                                                                                                                                                                                                                                                                                                                                                                                                                                                                                                                                                                                                                                                                                                                                                                                                                                                                                                                                                                                                                                                                                                                                                                                                                                                                                                                                                | Respiratory Virus Unit, National Infection Service, Public Health England | Respiratory Virus Unit, Microbiology Services Colindale, Public Health England                                                                                                 | Angie Lackenby; Joanna Ellis; Jonathan Hubb; Kirstin Edwards; Leena Bhaw; Maria Zambon; Maria Zambon.; Monica Galiano; Omolola Akinbami; Richard Myers; Shahjahan Miah; Steven Platt; Tiina Taits                                                                                                                                                                                                                                                                                                                                                                                                                                                                                                             |
| EPI_ISL_1407382                                                                                                                                                                                                                                                                                                                                                                                                                                                                                                                                                                                                                                                                                                                                                                                                                                                                                                                                                                                                                                                                                                                                                                                                                                                                                                                                                                                                                | Rhode Island Department of Health                                         | Infectious Disease Program, Broad Institute of Harvard and MIT                                                                                                                 | Adams, G.; Azevedo, K.; B.L.; B.W.; Bauer, M.; Birren; Carter, A.; Chaluvaadi, S.; D.J.; DeRuff, K.; Gladden-Young, A.; Huard, R.; J.E.; K.J.; King, E.; Lagerborg, K.; Lemieux; Loreth, C.; Miller, A.; Normandin, E.; P.C.; Park; Pearlman, L.; Reilly, S.; Rudy, M.; Sabeti; Siddle; Tomkins-Tinch, C.; and MacInnis                                                                                                                                                                                                                                                                                                                                                                                       |



|                                                                                                                                                                                                                                                                                                                                                                                                                                                                                                                                                                                                                                                                                                                                                                                                                                                                                                                                                                                                                                                                                                                                                                                                                                                                                                                                                                                                                                                                                    |                                                                                                                                                                                                          |                                                                                                                                                                                                                                            |                                                                                                                                                                                                                                                                                                                                                                                                                                                                                                                                                                                                                                                                                                                                                                                                                                                                                                                                                                                                                                                                                                                                                                                                                                                                                                                                                                                                                                                                                                                                                                                                                        |
|------------------------------------------------------------------------------------------------------------------------------------------------------------------------------------------------------------------------------------------------------------------------------------------------------------------------------------------------------------------------------------------------------------------------------------------------------------------------------------------------------------------------------------------------------------------------------------------------------------------------------------------------------------------------------------------------------------------------------------------------------------------------------------------------------------------------------------------------------------------------------------------------------------------------------------------------------------------------------------------------------------------------------------------------------------------------------------------------------------------------------------------------------------------------------------------------------------------------------------------------------------------------------------------------------------------------------------------------------------------------------------------------------------------------------------------------------------------------------------|----------------------------------------------------------------------------------------------------------------------------------------------------------------------------------------------------------|--------------------------------------------------------------------------------------------------------------------------------------------------------------------------------------------------------------------------------------------|------------------------------------------------------------------------------------------------------------------------------------------------------------------------------------------------------------------------------------------------------------------------------------------------------------------------------------------------------------------------------------------------------------------------------------------------------------------------------------------------------------------------------------------------------------------------------------------------------------------------------------------------------------------------------------------------------------------------------------------------------------------------------------------------------------------------------------------------------------------------------------------------------------------------------------------------------------------------------------------------------------------------------------------------------------------------------------------------------------------------------------------------------------------------------------------------------------------------------------------------------------------------------------------------------------------------------------------------------------------------------------------------------------------------------------------------------------------------------------------------------------------------------------------------------------------------------------------------------------------------|
| EPI_ISL_3247331                                                                                                                                                                                                                                                                                                                                                                                                                                                                                                                                                                                                                                                                                                                                                                                                                                                                                                                                                                                                                                                                                                                                                                                                                                                                                                                                                                                                                                                                    | Rothen Medizinische Laboratorien AG                                                                                                                                                                      | Clinical Bacteriology                                                                                                                                                                                                                      | Adrian Egli; Alfredo Mari; Fanny Wegner; Hans Hirsch; Helena MB Seth-Smith; Ingrid Steffen; Julia Bielicki; Karoline Leuzinger; Manuel Battegay; Tim Roloff                                                                                                                                                                                                                                                                                                                                                                                                                                                                                                                                                                                                                                                                                                                                                                                                                                                                                                                                                                                                                                                                                                                                                                                                                                                                                                                                                                                                                                                            |
| EPI_ISL_3375379                                                                                                                                                                                                                                                                                                                                                                                                                                                                                                                                                                                                                                                                                                                                                                                                                                                                                                                                                                                                                                                                                                                                                                                                                                                                                                                                                                                                                                                                    | Rumah Sakit Universitas Tanjungpura                                                                                                                                                                      | National Institute of Health Research and Development                                                                                                                                                                                      | Andriani; Arie Ardiansyah Nugraha; Delima Fajar Liana; Fajar Nur Sulistiyohadi; Hana Aspari Pawestri; Hartanti Dian Ikawati; Kartika Dewi Puspita; Krisna Pangesti; Nelly Puspandari; Pustu Astuti Vivi Setiawaty; Siti Sifi Shofiyah; Subangkit; Triyani Soekarsjo; Virhan Novianry                                                                                                                                                                                                                                                                                                                                                                                                                                                                                                                                                                                                                                                                                                                                                                                                                                                                                                                                                                                                                                                                                                                                                                                                                                                                                                                                   |
| EPI_ISL_2754201                                                                                                                                                                                                                                                                                                                                                                                                                                                                                                                                                                                                                                                                                                                                                                                                                                                                                                                                                                                                                                                                                                                                                                                                                                                                                                                                                                                                                                                                    | S.C Microbiologia e virologia - Speciale Centro influenza -AOU di Sassari                                                                                                                                | Laboratorio Biologia Molecolare Sars Cov2 - UOC Laboratorio Analisi - Servizio Medicina di Laboratorio, Ospedale "San Francesco" - ATS-ASSL Nuoro and Laboratorio specialistico UOC Ematologia - Ospedale "San Francesco" - ATS-ASSL Nuoro | Asproni Rosanna; Carta Franco; Fancello Patrizia; Fiamma Maura; Garau Maria Cristina; Malune Paolo; Mameli Giuseppe; Palmas Angelo Domenico; Pira Giovanna; Piras Giovanna; Rimini Elena; Rosu Valentina; Salvatore Rubino; Serra Caterina                                                                                                                                                                                                                                                                                                                                                                                                                                                                                                                                                                                                                                                                                                                                                                                                                                                                                                                                                                                                                                                                                                                                                                                                                                                                                                                                                                             |
| EPI_ISL_3356286                                                                                                                                                                                                                                                                                                                                                                                                                                                                                                                                                                                                                                                                                                                                                                                                                                                                                                                                                                                                                                                                                                                                                                                                                                                                                                                                                                                                                                                                    | S.S.D. Microbiologia, Ospedale Santa Corona di Pietra Ligure, ASL 2 Liguria                                                                                                                              | U.O. Igiene, Ospedale Policlinico San Martino                                                                                                                                                                                              | Bruzzone Bianca; Caligiuri Patrizia; De Pace Vanessa; Domnich Alexander; Icardi Giancarlo on behalf of SARS-CoV-2 ITALIAN RESEARCH ENTERPRISE-(SCIRE) Collaborative Group; Orsi Andrea; Ricucci Valentina; Valle Caterina                                                                                                                                                                                                                                                                                                                                                                                                                                                                                                                                                                                                                                                                                                                                                                                                                                                                                                                                                                                                                                                                                                                                                                                                                                                                                                                                                                                              |
| EPI_ISL_2131692, EPI_ISL_2131728, EPI_ISL_3187979, EPI_ISL_3187985, EPI_ISL_3187989, EPI_ISL_3187991, EPI_ISL_3188010, EPI_ISL_3188015, EPI_ISL_3188024, EPI_ISL_3188039, EPI_ISL_3188043, EPI_ISL_3188046, EPI_ISL_3188050, EPI_ISL_3188054, EPI_ISL_3188071, EPI_ISL_3188106, EPI_ISL_3190815, EPI_ISL_3193102, EPI_ISL_3193133, EPI_ISL_3193162, EPI_ISL_3193175, EPI_ISL_3193176, EPI_ISL_3193189, EPI_ISL_3193213, EPI_ISL_3194732, EPI_ISL_3194748, EPI_ISL_3195115, EPI_ISL_3195147, EPI_ISL_3195199, EPI_ISL_3195203, EPI_ISL_3195522, EPI_ISL_3195526, EPI_ISL_3195550, EPI_ISL_3195584, EPI_ISL_3195672, EPI_ISL_3195720, EPI_ISL_3195725, EPI_ISL_3195721, EPI_ISL_3195731, EPI_ISL_3195760, EPI_ISL_3195762, EPI_ISL_3195766, EPI_ISL_3196352, EPI_ISL_3196370, EPI_ISL_3196374, EPI_ISL_3196379, EPI_ISL_3196390, EPI_ISL_3196391, EPI_ISL_3196394, EPI_ISL_3196411, EPI_ISL_3196413, EPI_ISL_3196425, EPI_ISL_3196426, EPI_ISL_3196432, EPI_ISL_3196446, EPI_ISL_3196456, EPI_ISL_3196470, EPI_ISL_3196513, EPI_ISL_3196705, EPI_ISL_3196719, EPI_ISL_3196725, EPI_ISL_3196728, EPI_ISL_3196742, EPI_ISL_3196750, EPI_ISL_3196751, EPI_ISL_3196977, EPI_ISL_3196996, EPI_ISL_3197040, EPI_ISL_3197088, EPI_ISL_3197100, EPI_ISL_3197120, EPI_ISL_3197172, EPI_ISL_3197170, EPI_ISL_3197180, EPI_ISL_3197182, EPI_ISL_3197188, EPI_ISL_3197189, EPI_ISL_3198950, EPI_ISL_3198961, EPI_ISL_3198965, EPI_ISL_3198967, EPI_ISL_3198982, EPI_ISL_3199062, EPI_ISL_3199670 | U.O. Igiene, Ospedale Policlinico San Martino                                                                                                                                                            | Hazuka Y Furihata; Hiromizu Takahashi; Kentaro Itokawa; Makoto Kuroda; Masanori Hashino; Masumichi Saito; Naomi Nojiri; Nozomu Hanaoka; Rina Tanaka; Sana Uchikoba; Tsuguto Fujimoto; Tsuyoshi Sekizuka                                    |                                                                                                                                                                                                                                                                                                                                                                                                                                                                                                                                                                                                                                                                                                                                                                                                                                                                                                                                                                                                                                                                                                                                                                                                                                                                                                                                                                                                                                                                                                                                                                                                                        |
| see above                                                                                                                                                                                                                                                                                                                                                                                                                                                                                                                                                                                                                                                                                                                                                                                                                                                                                                                                                                                                                                                                                                                                                                                                                                                                                                                                                                                                                                                                          | SARS-CoV-2 testing team, National Institute of Infectious Diseases                                                                                                                                       | Pathogen Genomics Center, National Institute of Infectious Diseases                                                                                                                                                                        |                                                                                                                                                                                                                                                                                                                                                                                                                                                                                                                                                                                                                                                                                                                                                                                                                                                                                                                                                                                                                                                                                                                                                                                                                                                                                                                                                                                                                                                                                                                                                                                                                        |
| EPI_ISL_977607, EPI_ISL_977645                                                                                                                                                                                                                                                                                                                                                                                                                                                                                                                                                                                                                                                                                                                                                                                                                                                                                                                                                                                                                                                                                                                                                                                                                                                                                                                                                                                                                                                     | SC (UCO) Igiene e Sanità Pubblica (funzione integrata con SC Microbiologia e Virologia) e Laboratory of Molecular Virology of the International Centre for Genetic Engineering and Biotechnology (ICGEB) | ARGO Laboratorio Genomica ed Epigenomica                                                                                                                                                                                                   | D'Agaro P; Dal Monego S; De Rosa R; Degasperri M; Licastro D; Lombardo F; Marcello A                                                                                                                                                                                                                                                                                                                                                                                                                                                                                                                                                                                                                                                                                                                                                                                                                                                                                                                                                                                                                                                                                                                                                                                                                                                                                                                                                                                                                                                                                                                                   |
| EPI_ISL_2201320, EPI_ISL_2723589, EPI_ISL_2723593, EPI_ISL_3242425, EPI_ISL_3242440, EPI_ISL_3242443, EPI_ISL_3261047, EPI_ISL_3261053, EPI_ISL_3261061, EPI_ISL_3875454, EPI_ISL_7015628                                                                                                                                                                                                                                                                                                                                                                                                                                                                                                                                                                                                                                                                                                                                                                                                                                                                                                                                                                                                                                                                                                                                                                                                                                                                                          | see above                                                                                                                                                                                                | ARGO Laboratorio Genomica ed Epigenomica                                                                                                                                                                                                   | Barbone F; Braida C; Breda A; Busetti M; D'Agaro P; Dal Monego S; Degasperri M; Fontana F; Koncan R; Licastro D; Maggiore A; Marcello A; Pipan C; Piscianz E; Segat L                                                                                                                                                                                                                                                                                                                                                                                                                                                                                                                                                                                                                                                                                                                                                                                                                                                                                                                                                                                                                                                                                                                                                                                                                                                                                                                                                                                                                                                  |
| EPI_ISL_3923428                                                                                                                                                                                                                                                                                                                                                                                                                                                                                                                                                                                                                                                                                                                                                                                                                                                                                                                                                                                                                                                                                                                                                                                                                                                                                                                                                                                                                                                                    | SC (UCO) Igiene e Sanità Pubblica, ASUGI, Trieste                                                                                                                                                        | SC (UCO) Igiene e Sanità Pubblica, ASUGI, Trieste                                                                                                                                                                                          | Barbone F; Braida C; D'Agaro P; Dal Monego S; De Rosa R; Degasperri M; Licastro D; Marcello A; Segat L                                                                                                                                                                                                                                                                                                                                                                                                                                                                                                                                                                                                                                                                                                                                                                                                                                                                                                                                                                                                                                                                                                                                                                                                                                                                                                                                                                                                                                                                                                                 |
| EPI_ISL_2787275, EPI_ISL_2787285                                                                                                                                                                                                                                                                                                                                                                                                                                                                                                                                                                                                                                                                                                                                                                                                                                                                                                                                                                                                                                                                                                                                                                                                                                                                                                                                                                                                                                                   | SC Dept of Health and Env. Control-Bureau of Laboratories                                                                                                                                                | Centers for Disease Control and Prevention Division of Viral Diseases, Pathogen Discovery                                                                                                                                                  | Alison Laufer Halpin; Ben L. Rambo-Martin; Clinton R. Paden; Dakota Howard; Darlene Wagner; Dave Wentworth; Dhvani Batra; Jasmine Padilla; Justin Lee; Katie Dillon; Krista Queen; Kristen Knepe; Kristen Nobile; Mark Burroughs; Matthew Schmerer; Mili Sheth; Peter Cook; Sam Shepard; Sarah Noces; Shoshona Lee; Suxiang Tong; Vivien Dugan; Yvette Unoarumhi                                                                                                                                                                                                                                                                                                                                                                                                                                                                                                                                                                                                                                                                                                                                                                                                                                                                                                                                                                                                                                                                                                                                                                                                                                                       |
| EPI_ISL_1372549                                                                                                                                                                                                                                                                                                                                                                                                                                                                                                                                                                                                                                                                                                                                                                                                                                                                                                                                                                                                                                                                                                                                                                                                                                                                                                                                                                                                                                                                    | SC Microbiologia e Virologia AOUSS                                                                                                                                                                       | Laboratorio specialistico UOC Ematologia - Ospedale "San Francesco" - ATS-ASSL Nuoro                                                                                                                                                       | Anna Puggioni; Asproni Rosanna; Bianca Paglietti; Caterina Serra; Claudia Piu; Elena Rimini; Erica Mura; Fiamma Maura; Flavia Angioi; Gabriele Ibbia; Giulia Rocca; Laura Firino; Lo Maglio Iana; Malune Paolo; Mameli Giuseppe Salvatore Rubino; Marcello Abbondio; Monne Maria Itria; Palmas Angelo Domenico; Piras Giovanna; Rosalba Govoni; Rosangela Sau; Sergio Uzzau.; Vincenzo Lai                                                                                                                                                                                                                                                                                                                                                                                                                                                                                                                                                                                                                                                                                                                                                                                                                                                                                                                                                                                                                                                                                                                                                                                                                             |
| EPI_ISL_3920208                                                                                                                                                                                                                                                                                                                                                                                                                                                                                                                                                                                                                                                                                                                                                                                                                                                                                                                                                                                                                                                                                                                                                                                                                                                                                                                                                                                                                                                                    | SCM Cerebrialliance                                                                                                                                                                                      | National Reference Center for Viruses of Respiratory Infections, Institut Pasteur, Paris                                                                                                                                                   | Angela Brisebarre; Camille Capel; Christophe Malabat; Corinne Maufrais; Etienne Simon-Lorière; Frédéric Lemoine; Hub de Bioinformatique et Biostatistique; Louise Lefrançois; Marion Barbet; Maud Vanpeene; Méline Bizard; Sylvie Behillili; Sylvie Van der Werf; Vincent Enouf                                                                                                                                                                                                                                                                                                                                                                                                                                                                                                                                                                                                                                                                                                                                                                                                                                                                                                                                                                                                                                                                                                                                                                                                                                                                                                                                        |
| EPI_ISL_1966627                                                                                                                                                                                                                                                                                                                                                                                                                                                                                                                                                                                                                                                                                                                                                                                                                                                                                                                                                                                                                                                                                                                                                                                                                                                                                                                                                                                                                                                                    | SECAO CENTRO DE DIAGNOSTICO SECEDI                                                                                                                                                                       | Instituto Butantan / Mendelics                                                                                                                                                                                                             | Antonio Jorge Martins; Bianca Cechetto Carlos. Mendelics; Bibiana Santos; Claudia Renata dos Santos Barros; Cintia Bittar; David Schlesinger. Hemocentro Ribeirão Preto: Simone Kashima; Debora Botequiu Moretti; Elaine Cristina Marquize; Elaine Vieira dos Santos; Elisangela Chicaroni Mattos; Erika Freitas; Evandra Strazza Rodrigues; Felipe Allan da Silva da Costa; Flavia Aburjaile; Fábio Sossai Possebon; Guilherme Campos; Guilherme Targino Valente; Heidge Fukumasu. USP-Butucatu: Rejane Maria Tommasini Grotto; Helena Lage Ferreira; Instituto Butantan: Dimas Tadeu Covas; Jardelina de Souza Todao Bernardino; Jayme A. Souza-Neto; Jessica Cristina Chagas Lesbon; Jorge A. Petrolli Marchesi; José Salvatore Leister Patané; João Paulo Kitajima; João Pessoa Araújo Jr.; Leila Sabrina Ullmann; Loyze Paola Oliveira de Lima; Luiz Aurelio de Campos Crispim. Centro de Genômica Funcional da ESALQ; Luiz Lehmann Coutinho; Luiz Carlos Junior de Alcantara; Livia Sacchetto; Maisa C. Pereira Parra; Maria Carolina Elias; Marta Giovanetti; Marília Moraes; Maurício Lacerda Nogueira. Prefeitura de São Paulo: Melissa Palmieri; Patricia Akemi Assato; Paula Rahal; Paulo Inacio da Costa; Rafael dos Santos Bezerra; Raquel de Lello Rocha Campos Cassano. NGS Soluções Genômicas: Pilar Drummond Sampaio Corrêa Mariani. FZEA-USP Pirassununga: Mirele Daiiana Poletti; Raul Machado Neto; Ricardo Augusto Brassalotti; Ricardo Haddad; Rodrigo Tocantins Calado. FAMERP-SJRP: Cecília Artico Banho; Sandra Coccuzzo Sampaio; Svetoslav Nanev Slavov; Vagner Fonseca; Vincent Louis Viola |
| EPI_ISL_1469709                                                                                                                                                                                                                                                                                                                                                                                                                                                                                                                                                                                                                                                                                                                                                                                                                                                                                                                                                                                                                                                                                                                                                                                                                                                                                                                                                                                                                                                                    | SECRETARIA MUNICIPAL DE SAUDE DE TAQUARA                                                                                                                                                                 | Epiclín                                                                                                                                                                                                                                    | Ana Paula Muterle; Carolina Comerlato; Eliana Márcia Da Ros Wendland; Fernando Hayashi Sant'Anna; Janira Pritchula; Juliana Comerlato                                                                                                                                                                                                                                                                                                                                                                                                                                                                                                                                                                                                                                                                                                                                                                                                                                                                                                                                                                                                                                                                                                                                                                                                                                                                                                                                                                                                                                                                                  |
| EPI_ISL_3204633, EPI_ISL_3204643, EPI_ISL_3204643                                                                                                                                                                                                                                                                                                                                                                                                                                                                                                                                                                                                                                                                                                                                                                                                                                                                                                                                                                                                                                                                                                                                                                                                                                                                                                                                                                                                                                  | SEEBMO                                                                                                                                                                                                   | Instituto Nacional de Saude (INSA)                                                                                                                                                                                                         | Borges et al                                                                                                                                                                                                                                                                                                                                                                                                                                                                                                                                                                                                                                                                                                                                                                                                                                                                                                                                                                                                                                                                                                                                                                                                                                                                                                                                                                                                                                                                                                                                                                                                           |
| EPI_ISL_1623441                                                                                                                                                                                                                                                                                                                                                                                                                                                                                                                                                                                                                                                                                                                                                                                                                                                                                                                                                                                                                                                                                                                                                                                                                                                                                                                                                                                                                                                                    | SELARL MIRIALIS CLUSES                                                                                                                                                                                   | CNR Virus des Infections Respiratoires - France SUD                                                                                                                                                                                        | Antonin Bai; Bruno Lina; Bruno Simon; Gregory Destras; Gwendolyne Burfin; Hadrien Regue; Laurence Josset; Martine Valette; Quentin Semanas                                                                                                                                                                                                                                                                                                                                                                                                                                                                                                                                                                                                                                                                                                                                                                                                                                                                                                                                                                                                                                                                                                                                                                                                                                                                                                                                                                                                                                                                             |
| EPI_ISL_1696101, EPI_ISL_1696107                                                                                                                                                                                                                                                                                                                                                                                                                                                                                                                                                                                                                                                                                                                                                                                                                                                                                                                                                                                                                                                                                                                                                                                                                                                                                                                                                                                                                                                   | SELAS BC-LAB                                                                                                                                                                                             | Department of Virology, Henri Mondor University Hospital, Assistance Publique Hôpitaux de Paris, Université Paris-Est Créteil, INSERM U955                                                                                                 | Alexandre Soulier; Christophe Rodriguez; Elisabeth Trawinski; Guillaume Gricourt; Jean-Michel Pawlowsky; Melissa N'Debi; Slim Fourati; Vanessa Demontant                                                                                                                                                                                                                                                                                                                                                                                                                                                                                                                                                                                                                                                                                                                                                                                                                                                                                                                                                                                                                                                                                                                                                                                                                                                                                                                                                                                                                                                               |
| EPI_ISL_3204572, EPI_ISL_3204592, EPI_ISL_3204612                                                                                                                                                                                                                                                                                                                                                                                                                                                                                                                                                                                                                                                                                                                                                                                                                                                                                                                                                                                                                                                                                                                                                                                                                                                                                                                                                                                                                                  | SESARAM                                                                                                                                                                                                  | Instituto Nacional de Saude (INSA)                                                                                                                                                                                                         | Borges et al                                                                                                                                                                                                                                                                                                                                                                                                                                                                                                                                                                                                                                                                                                                                                                                                                                                                                                                                                                                                                                                                                                                                                                                                                                                                                                                                                                                                                                                                                                                                                                                                           |
| EPI_ISL_961729, EPI_ISL_1336714, EPI_ISL_1336910, EPI_ISL_1785083, EPI_ISL_1841137                                                                                                                                                                                                                                                                                                                                                                                                                                                                                                                                                                                                                                                                                                                                                                                                                                                                                                                                                                                                                                                                                                                                                                                                                                                                                                                                                                                                 | SIESP CHIETI - DRIVE IN CHIETI                                                                                                                                                                           | Istituto Zooprofilattico Sperimentale dell'Abruzzo e Molise "G. Caporale"                                                                                                                                                                  | Ancora M; Calistri P; Cammà C; Caporale M; Curini V; Delli Compagni E; Di Domenico M; Di Lollo V; Di Lollo Valeria; Di Pasquale A; Lorusso A; Mangone I; Marcacci M; Puglia I; Rinaldi A; Savini G; Scialabba S                                                                                                                                                                                                                                                                                                                                                                                                                                                                                                                                                                                                                                                                                                                                                                                                                                                                                                                                                                                                                                                                                                                                                                                                                                                                                                                                                                                                        |
| EPI_ISL_1841194, EPI_ISL_1841224                                                                                                                                                                                                                                                                                                                                                                                                                                                                                                                                                                                                                                                                                                                                                                                                                                                                                                                                                                                                                                                                                                                                                                                                                                                                                                                                                                                                                                                   | SIESP CHIETI - DRIVE IN LANCIANO                                                                                                                                                                         | Istituto Zooprofilattico Sperimentale dell'Abruzzo e Molise "G. Caporale"                                                                                                                                                                  | Ancora M; Calistri P; Cammà C; Caporale M; Curini V; Delli Compagni E; Di Domenico M; Di Lollo Valeria; Di Pasquale A; Lorusso A; Mangone I; Marcacci M; Puglia I; Rinaldi A; Savini G; Scialabba S                                                                                                                                                                                                                                                                                                                                                                                                                                                                                                                                                                                                                                                                                                                                                                                                                                                                                                                                                                                                                                                                                                                                                                                                                                                                                                                                                                                                                    |
| EPI_ISL_1647187, EPI_ISL_2001335, EPI_ISL_2001364                                                                                                                                                                                                                                                                                                                                                                                                                                                                                                                                                                                                                                                                                                                                                                                                                                                                                                                                                                                                                                                                                                                                                                                                                                                                                                                                                                                                                                  | SIESP CHIETI - DRIVE IN ORTONA                                                                                                                                                                           | Istituto Zooprofilattico Sperimentale dell'Abruzzo e Molise "G. Caporale"                                                                                                                                                                  | Ancora M; Calistri P; Cammà C; Caporale M; Curini V; Delli Compagni E; Di Domenico M; Di Lollo Valeria; Di Pasquale A; Lorusso A; Mangone I; Marcacci M; Puglia I; Rinaldi A; Savini G; Scialabba S                                                                                                                                                                                                                                                                                                                                                                                                                                                                                                                                                                                                                                                                                                                                                                                                                                                                                                                                                                                                                                                                                                                                                                                                                                                                                                                                                                                                                    |
| EPI_ISL_1580545, EPI_ISL_1580649                                                                                                                                                                                                                                                                                                                                                                                                                                                                                                                                                                                                                                                                                                                                                                                                                                                                                                                                                                                                                                                                                                                                                                                                                                                                                                                                                                                                                                                   | SIESP CHIETI - DRIVE IN ORTONA ORTONA(CHIETI)                                                                                                                                                            | Istituto Zooprofilattico Sperimentale dell'Abruzzo e Molise "G. Caporale"                                                                                                                                                                  | Ancora M; Calistri P; Cammà C; Caporale M; Curini V; Delli Compagni E; Di Domenico M; Di Lollo Valeria; Di Pasquale A; Lorusso A; Mangone I; Marcacci M; Puglia I; Rinaldi A; Savini G; Scialabba S                                                                                                                                                                                                                                                                                                                                                                                                                                                                                                                                                                                                                                                                                                                                                                                                                                                                                                                                                                                                                                                                                                                                                                                                                                                                                                                                                                                                                    |
| EPI_ISL_1785139                                                                                                                                                                                                                                                                                                                                                                                                                                                                                                                                                                                                                                                                                                                                                                                                                                                                                                                                                                                                                                                                                                                                                                                                                                                                                                                                                                                                                                                                    | SIESP CHIETI - DRIVE IN VASTO                                                                                                                                                                            | Istituto Zooprofilattico Sperimentale dell'Abruzzo e Molise "G. Caporale"                                                                                                                                                                  | Ancora M; Calistri P; Cammà C; Caporale M; Curini V; Delli Compagni E; Di Domenico M; Di Lollo Valeria; Di Pasquale A; Lorusso A; Mangone I; Marcacci M; Puglia I; Rinaldi A; Savini G; Scialabba S                                                                                                                                                                                                                                                                                                                                                                                                                                                                                                                                                                                                                                                                                                                                                                                                                                                                                                                                                                                                                                                                                                                                                                                                                                                                                                                                                                                                                    |
| EPI_ISL_1117490                                                                                                                                                                                                                                                                                                                                                                                                                                                                                                                                                                                                                                                                                                                                                                                                                                                                                                                                                                                                                                                                                                                                                                                                                                                                                                                                                                                                                                                                    | SIESP CHIETI, DRIVE IN VASTO                                                                                                                                                                             | Istituto Zooprofilattico Sperimentale dell'Abruzzo e Molise "G. Caporale"                                                                                                                                                                  | Ancora M; Calistri P; Cammà C; Curini V; Di Domenico M; Di Pasquale A; Lorusso A; Mangone I; Marcacci M; Puglia I; Rinaldi A; Savini G; Scialabba S                                                                                                                                                                                                                                                                                                                                                                                                                                                                                                                                                                                                                                                                                                                                                                                                                                                                                                                                                                                                                                                                                                                                                                                                                                                                                                                                                                                                                                                                    |
| EPI_ISL_1117487                                                                                                                                                                                                                                                                                                                                                                                                                                                                                                                                                                                                                                                                                                                                                                                                                                                                                                                                                                                                                                                                                                                                                                                                                                                                                                                                                                                                                                                                    | SIESP DIP PREV CHIETI                                                                                                                                                                                    | Istituto Zooprofilattico Sperimentale dell'Abruzzo e Molise "G. Caporale"                                                                                                                                                                  | Ancora M; Calistri P; Cammà C; Curini V; Di Domenico M; Di Pasquale A; Lorusso A; Mangone I; Marcacci M; Puglia I; Rinaldi A; Savini G; Scialabba S                                                                                                                                                                                                                                                                                                                                                                                                                                                                                                                                                                                                                                                                                                                                                                                                                                                                                                                                                                                                                                                                                                                                                                                                                                                                                                                                                                                                                                                                    |
| EPI_ISL_1117680                                                                                                                                                                                                                                                                                                                                                                                                                                                                                                                                                                                                                                                                                                                                                                                                                                                                                                                                                                                                                                                                                                                                                                                                                                                                                                                                                                                                                                                                    | SIESP DIP PREV TERAMO                                                                                                                                                                                    | Istituto Zooprofilattico Sperimentale dell'Abruzzo e Molise "G. Caporale"                                                                                                                                                                  | Ancora M; Calistri P; Cammà C; Curini V; Di Domenico M; Di Pasquale A; Lorusso A; Mangone I; Marcacci M; Puglia I; Rinaldi A; Savini G; Scialabba S                                                                                                                                                                                                                                                                                                                                                                                                                                                                                                                                                                                                                                                                                                                                                                                                                                                                                                                                                                                                                                                                                                                                                                                                                                                                                                                                                                                                                                                                    |
| EPI_ISL_883287                                                                                                                                                                                                                                                                                                                                                                                                                                                                                                                                                                                                                                                                                                                                                                                                                                                                                                                                                                                                                                                                                                                                                                                                                                                                                                                                                                                                                                                                     | SIESP DIPARTIMENTO DI PREVENZIONE CHIE                                                                                                                                                                   | Istituto Zooprofilattico Sperimentale dell'Abruzzo e Molise "G. Caporale"                                                                                                                                                                  | Ancora M; Calistri P; Cammà C; Curini V; Di Domenico M; Di Pasquale A; Lorusso A; Mangone I; Marcacci M; Puglia I; Rinaldi A; Savini G; Scialabba S                                                                                                                                                                                                                                                                                                                                                                                                                                                                                                                                                                                                                                                                                                                                                                                                                                                                                                                                                                                                                                                                                                                                                                                                                                                                                                                                                                                                                                                                    |
| EPI_ISL_806732                                                                                                                                                                                                                                                                                                                                                                                                                                                                                                                                                                                                                                                                                                                                                                                                                                                                                                                                                                                                                                                                                                                                                                                                                                                                                                                                                                                                                                                                     | SIESP DIPARTIMENTO DI PREVENZIONE CHIETI                                                                                                                                                                 | Istituto Zooprofilattico Sperimentale dell'Abruzzo e Molise "G. Caporale"                                                                                                                                                                  | Ancora M; Calistri P; Cammà C; Curini V; Di Domenico M; Di Pasquale A; Lorusso A; Mangone I; Marcacci M; Puglia I; Rinaldi A; Savini G                                                                                                                                                                                                                                                                                                                                                                                                                                                                                                                                                                                                                                                                                                                                                                                                                                                                                                                                                                                                                                                                                                                                                                                                                                                                                                                                                                                                                                                                                 |
| EPI_ISL_1391254                                                                                                                                                                                                                                                                                                                                                                                                                                                                                                                                                                                                                                                                                                                                                                                                                                                                                                                                                                                                                                                                                                                                                                                                                                                                                                                                                                                                                                                                    | SIESP DIPARTIMENTO DI PREVENZIONE CHIETI CHIETI(CHIETI)                                                                                                                                                  | Istituto Zooprofilattico Sperimentale dell'Abruzzo e Molise "G. Caporale"                                                                                                                                                                  | Ancora M; Calistri P; Cammà C; Caporale M; Curini V; Delli Compagni E; Di Domenico M; Di Lollo Valeria; Di Pasquale A; Lorusso A; Mangone I; Marcacci M; Puglia I; Rinaldi A; Savini G; Scialabba S                                                                                                                                                                                                                                                                                                                                                                                                                                                                                                                                                                                                                                                                                                                                                                                                                                                                                                                                                                                                                                                                                                                                                                                                                                                                                                                                                                                                                    |
| EPI_ISL_806748, EPI_ISL_1841113, EPI_ISL_1841143, EPI_ISL_1917525, EPI_ISL_2131407, EPI_ISL_2235374, EPI_ISL_2270841, EPI_ISL_2270888                                                                                                                                                                                                                                                                                                                                                                                                                                                                                                                                                                                                                                                                                                                                                                                                                                                                                                                                                                                                                                                                                                                                                                                                                                                                                                                                              | see above                                                                                                                                                                                                | Istituto Zooprofilattico Sperimentale dell'Abruzzo e Molise "G. Caporale"                                                                                                                                                                  | Ancora M; Calistri P; Cammà C; Caporale M; Curini V; Delli Compagni E; Di Domenico M; Di Lollo Valeria; Di Pasquale A; Lorusso A; Mangone I; Marcacci M; Puglia I; Rinaldi A; Savini G; Scialabba S                                                                                                                                                                                                                                                                                                                                                                                                                                                                                                                                                                                                                                                                                                                                                                                                                                                                                                                                                                                                                                                                                                                                                                                                                                                                                                                                                                                                                    |

|                                                                                                                                                                                                                                                                                                                                                                                                                                                                                                                                                                                                                                    |                                                            |                                                                                               |                                                                                                                                                                                                                                                                                                                                 |                                                                                                                                                                                                                                                                                                                                                                                                                                                                                              |
|------------------------------------------------------------------------------------------------------------------------------------------------------------------------------------------------------------------------------------------------------------------------------------------------------------------------------------------------------------------------------------------------------------------------------------------------------------------------------------------------------------------------------------------------------------------------------------------------------------------------------------|------------------------------------------------------------|-----------------------------------------------------------------------------------------------|---------------------------------------------------------------------------------------------------------------------------------------------------------------------------------------------------------------------------------------------------------------------------------------------------------------------------------|----------------------------------------------------------------------------------------------------------------------------------------------------------------------------------------------------------------------------------------------------------------------------------------------------------------------------------------------------------------------------------------------------------------------------------------------------------------------------------------------|
| EPI_ISL_1391205,<br>EPI_ISL_1403583,<br>EPI_ISL_1577917,<br>EPI_ISL_1578029,<br>EPI_ISL_1580535<br>EPI_ISL_961756                                                                                                                                                                                                                                                                                                                                                                                                                                                                                                                  | SIESP DIPARTIMENTO DI PREVENZIONE TERAMO TERAMO(TERAMO)    | Istituto Zooprofilattico Sperimentale dell'Abruzzo e Molise "G. Caporale"                     | Ancora M; Calistri P; Cammà C; Caporale M; Curini V; Delli Compagni E; Di Domenico M; Di Lollo Valeria; Di Pasquale A; Lorusso A; Mangone I; Marcacci M; Puglia I; Rinaldi A; Savini G; Scialabba S                                                                                                                             |                                                                                                                                                                                                                                                                                                                                                                                                                                                                                              |
|                                                                                                                                                                                                                                                                                                                                                                                                                                                                                                                                                                                                                                    | SIESP SULMONA                                              | Istituto Zooprofilattico Sperimentale dell'Abruzzo e Molise "G. Caporale"                     | Ancora M; Calistri P; Cammà C; Curini V; Di Domenico M; Di Pasquale A; Lorusso A; Mangone I; Marcacci M; Puglia I; Rinaldi A; Savini G; Scialabba S                                                                                                                                                                             |                                                                                                                                                                                                                                                                                                                                                                                                                                                                                              |
| EPI_ISL_1502513                                                                                                                                                                                                                                                                                                                                                                                                                                                                                                                                                                                                                    | SIESP SULMONA SULMONA(L'AQUILA)                            | Istituto Zooprofilattico Sperimentale dell'Abruzzo e Molise "G. Caporale"                     | Ancora M; Calistri P; Cammà C; Caporale M; Curini V; Delli Compagni E; Di Domenico M; Di Lollo Valeria; Di Pasquale A; Lorusso A; Mangone I; Marcacci M; Puglia I; Rinaldi A; Savini G; Scialabba S                                                                                                                             |                                                                                                                                                                                                                                                                                                                                                                                                                                                                                              |
| EPI_ISL_1036208                                                                                                                                                                                                                                                                                                                                                                                                                                                                                                                                                                                                                    | SIESP TERAMO                                               | Istituto Zooprofilattico Sperimentale dell'Abruzzo e Molise "G. Caporale"                     | Ancora M; Calistri P; Cammà C; Curini V; Di Domenico M; Di Pasquale A; Lorusso A; Mangone I; Marcacci M; Puglia I; Rinaldi A; Savini G; Scialabba S                                                                                                                                                                             |                                                                                                                                                                                                                                                                                                                                                                                                                                                                                              |
| EPI_ISL_3255545, EPI_ISL_3255551, EPI_ISL_3255563, EPI_ISL_3255566, EPI_ISL_3255570, EPI_ISL_3255579, EPI_ISL_3255610, EPI_ISL_3255623, EPI_ISL_3255638, EPI_ISL_3255657, EPI_ISL_3255689, EPI_ISL_3255738, EPI_ISL_3255751, EPI_ISL_3255772, EPI_ISL_3255780, EPI_ISL_3255783, EPI_ISL_3255796, EPI_ISL_3255827, EPI_ISL_3255865, EPI_ISL_3255872, EPI_ISL_3255885, EPI_ISL_3255887, EPI_ISL_3255891, EPI_ISL_3255894, EPI_ISL_3255895, EPI_ISL_3255937, EPI_ISL_3255952, EPI_ISL_3255962, EPI_ISL_3255971                                                                                                                        | see above                                                  | SK-Roy Romanow Provincial Laboratory                                                          | National Microbiology Laboratory (NML)                                                                                                                                                                                                                                                                                          | Alanna Senecal; Amanda Lang; Anna Majer; Anneliese Landgraff; CanCOGen's metadata curation team; Darian Hole; Elsie Grudeski; Gary Van Domselaar; Grace Seo; Jennifer Tanner; Jessica Minion; Kara Loos; Keith MacKenzie; Kirsten Biggar; Madison Chapel; Meredith Faires; Morag Graham; Natalie Knox; Nathalie Bastien; Philip Mabon; Public Health Agency of Canada CanCOGen team; Rachel DePaulo; Rhiannon Huzarzewich; Russell Mandes; Ryan McDonald; Shari Tyson; Timothy Booth; Yan Li |
| EPI_ISL_6512570                                                                                                                                                                                                                                                                                                                                                                                                                                                                                                                                                                                                                    | SURA                                                       | Laboratorio Departamental de Salud Publica de Antioquia                                       | Ana Victoria Valencia Duarte; Cristian Arbey Velarde Hoyos; Gloria Isabel Escobar; Idabely Betancur Ortiz; Juan P. Hernandez-Ortiz; Juan Pablo Isaza Agudelo; Maria Stella López                                                                                                                                                |                                                                                                                                                                                                                                                                                                                                                                                                                                                                                              |
| EPI_ISL_1241774,<br>EPI_ISL_1493034,<br>EPI_ISL_1672093,<br>EPI_ISL_1672107,<br>EPI_ISL_1793669,<br>EPI_ISL_3229597<br>EPI_ISL_796755                                                                                                                                                                                                                                                                                                                                                                                                                                                                                              | SYNLAB                                                     | GIGA Medical Genomics                                                                         | Bouchra Boujemla; Claire Gourzonès; Cécile Meex; Keith Durkin; Laurent Gillet; Maria Artesi; Marie-Pierre Hayette; Nadine Cambisano; Nathalie Renotte; Olivier Ek; Pierrette Melin; Raphaël Boreux; Sébastien Bontems; Vincent Bours                                                                                            |                                                                                                                                                                                                                                                                                                                                                                                                                                                                                              |
| EPI_ISL_7139274                                                                                                                                                                                                                                                                                                                                                                                                                                                                                                                                                                                                                    | SYNLAB ANGEL DIAGNOSTICA                                   | Instituto Nacional de Saude (INSA)                                                            | Borges et al                                                                                                                                                                                                                                                                                                                    |                                                                                                                                                                                                                                                                                                                                                                                                                                                                                              |
| EPI_ISL_6722455                                                                                                                                                                                                                                                                                                                                                                                                                                                                                                                                                                                                                    | SYNLAB ANGEL DIAGNOSTICA                                   | Laboratorio de biotecnología, Universidad Icesi                                               | Adrián Camilo Rodríguez Ararat; Diana M. Florez Giraldo; Marcela Mercado; Maria F. Villegas Torres; María I. Gutiérrez López; Paola A. Caicedo Burbano; Programa Nacional de Caracterización Genómica de SARS-CoV-2; Sara González Henao                                                                                        |                                                                                                                                                                                                                                                                                                                                                                                                                                                                                              |
| EPI_ISL_1352851, EPI_ISL_1567475, EPI_ISL_1567892, EPI_ISL_1568082, EPI_ISL_1571068, EPI_ISL_1572599, EPI_ISL_1572626, EPI_ISL_1572655, SYNLAB_1573916, EPI_ISL_1724551, EPI_ISL_1727589, EPI_ISL_1727636, EPI_ISL_1729204, EPI_ISL_1729385, EPI_ISL_1846926                                                                                                                                                                                                                                                                                                                                                                       | see above                                                  | Universidad del Valle                                                                         | Andres Castillo; Beatriz Parra & Programa Nacional de Caracterización Genómica de SARS-CoV-2; Diana López-Alvarez; Erica M. Aristizabal; Flor Saa; Melissa Solarte; Nelson Rivera Franco                                                                                                                                        |                                                                                                                                                                                                                                                                                                                                                                                                                                                                                              |
| EPI_ISL_1283039, EPI_ISL_1437259, EPI_ISL_1441587, EPI_ISL_1645637, EPI_ISL_1722448, EPI_ISL_1851823, EPI_ISL_2112220, EPI_ISL_2113043                                                                                                                                                                                                                                                                                                                                                                                                                                                                                             | see above                                                  | SYNLAB Jena Oncoscreen                                                                        | Robert Koch Institute                                                                                                                                                                                                                                                                                                           |                                                                                                                                                                                                                                                                                                                                                                                                                                                                                              |
| EPI_ISL_1437486,<br>EPI_ISL_1566354,<br>EPI_ISL_1641917,<br>EPI_ISL_1642191,<br>EPI_ISL_1722870,<br>EPI_ISL_1849731                                                                                                                                                                                                                                                                                                                                                                                                                                                                                                                | SYNLAB MVZ Berlin                                          | Robert Koch Institute                                                                         |                                                                                                                                                                                                                                                                                                                                 |                                                                                                                                                                                                                                                                                                                                                                                                                                                                                              |
| EPI_ISL_1354606, EPI_ISL_1432033, EPI_ISL_1440146, EPI_ISL_1566319, EPI_ISL_1572264, EPI_ISL_1642090, EPI_ISL_1849891                                                                                                                                                                                                                                                                                                                                                                                                                                                                                                              | SYNLAB MVZ Ettingen                                        | Robert Koch Institute                                                                         |                                                                                                                                                                                                                                                                                                                                 |                                                                                                                                                                                                                                                                                                                                                                                                                                                                                              |
| EPI_ISL_1218297, EPI_ISL_1283063, EPI_ISL_1286005, EPI_ISL_1434635, EPI_ISL_1437248, EPI_ISL_1565621, EPI_ISL_1567853, EPI_ISL_1574201, EPI_ISL_1574314, EPI_ISL_1574709, EPI_ISL_1574757, EPI_ISL_1574861, EPI_ISL_1574902, EPI_ISL_1642996, EPI_ISL_1645402, EPI_ISL_1645468, EPI_ISL_1645590, EPI_ISL_1645805, EPI_ISL_1645917, EPI_ISL_1723130, EPI_ISL_1723173, EPI_ISL_1723196                                                                                                                                                                                                                                               | see above                                                  | SYNLAB MVZ Leinfelden-Echterdingen                                                            | Robert Koch Institute                                                                                                                                                                                                                                                                                                           |                                                                                                                                                                                                                                                                                                                                                                                                                                                                                              |
| EPI_ISL_1440606, EPI_ISL_1442436, EPI_ISL_1565937, EPI_ISL_1639698, EPI_ISL_1644742, EPI_ISL_1644743, EPI_ISL_1644763, EPI_ISL_1720270, EPI_ISL_1720681, EPI_ISL_1723600, EPI_ISL_1723906, EPI_ISL_1723971, EPI_ISL_1725750, EPI_ISL_1726263, EPI_ISL_1726367, EPI_ISL_1726705, EPI_ISL_1726759, EPI_ISL_1728102, EPI_ISL_1728233, EPI_ISL_1728248, EPI_ISL_1728260, EPI_ISL_1728440, EPI_ISL_1728567, EPI_ISL_1729423, EPI_ISL_1845188, EPI_ISL_1846488, EPI_ISL_1851615, EPI_ISL_1852845, EPI_ISL_2116669, EPI_ISL_2117250, EPI_ISL_2124401, EPI_ISL_2124508, EPI_ISL_2126558, EPI_ISL_2128865, EPI_ISL_2130424, EPI_ISL_2130571 | see above                                                  | SYNLAB MVZ Leverkusen                                                                         | Robert Koch Institute                                                                                                                                                                                                                                                                                                           |                                                                                                                                                                                                                                                                                                                                                                                                                                                                                              |
| EPI_ISL_1642129                                                                                                                                                                                                                                                                                                                                                                                                                                                                                                                                                                                                                    | SYNLAB MVZ Neustadt a. d. Weinstraße                       | Robert Koch Institute                                                                         |                                                                                                                                                                                                                                                                                                                                 |                                                                                                                                                                                                                                                                                                                                                                                                                                                                                              |
| EPI_ISL_2128305                                                                                                                                                                                                                                                                                                                                                                                                                                                                                                                                                                                                                    | SYNLAB MVZ Neustadt a. d. Weinstraße                       | Robert Koch Institute                                                                         |                                                                                                                                                                                                                                                                                                                                 |                                                                                                                                                                                                                                                                                                                                                                                                                                                                                              |
| EPI_ISL_1437629, EPI_ISL_1440381, EPI_ISL_1566575, EPI_ISL_1566665, EPI_ISL_1573106, EPI_ISL_1641336, EPI_ISL_1724970, EPI_ISL_2116710, EPI_ISL_2116711                                                                                                                                                                                                                                                                                                                                                                                                                                                                            | see above                                                  | SYNLAB MVZ Trier                                                                              | Robert Koch Institute                                                                                                                                                                                                                                                                                                           |                                                                                                                                                                                                                                                                                                                                                                                                                                                                                              |
| EPI_ISL_1566556,<br>EPI_ISL_1641632,<br>EPI_ISL_3239478                                                                                                                                                                                                                                                                                                                                                                                                                                                                                                                                                                            | SYNLAB MVZ Weiden                                          | Robert Koch Institute                                                                         |                                                                                                                                                                                                                                                                                                                                 |                                                                                                                                                                                                                                                                                                                                                                                                                                                                                              |
| EPI_ISL_3230515,<br>EPI_ISL_3230631                                                                                                                                                                                                                                                                                                                                                                                                                                                                                                                                                                                                | SYNLAB Suomi                                               | Expert Microbiology, National Institute for Health and Welfare                                | Carita Savolainen-Kopra; Erika Lindh; Haider al-Hello; Jani Halkilaito; Kirsi Liitsola; Niina Ikonen; Olli Vapalahti; Pekka Ellonen; Phuoc Truong; Päivi Laurila; Ravi Kant; Sari Hannula; Soile Blomqvist; Teemu Smura                                                                                                         |                                                                                                                                                                                                                                                                                                                                                                                                                                                                                              |
| EPI_ISL_1138579                                                                                                                                                                                                                                                                                                                                                                                                                                                                                                                                                                                                                    | SYNLAB Eesti OÜ                                            | 1. Laboratory of Communicable Diseases (Estonia); 2. Eurofins Genomics Europe Sequencing GmbH | Lidia Dotsenko                                                                                                                                                                                                                                                                                                                  |                                                                                                                                                                                                                                                                                                                                                                                                                                                                                              |
| EPI_ISL_1468464                                                                                                                                                                                                                                                                                                                                                                                                                                                                                                                                                                                                                    | Sae servicio de Atendimento Especializado                  | Instituto Adolfo Lutz, Interdisciplinary Procedures Center, Strategic Laboratory              | Caio Vinicius Dias Lopes; Claudia Regina Gonçalves; Claudio Tavares Sacchi; Erica Valessa Ramos Gomes; Karoline Rodrigues Campos                                                                                                                                                                                                |                                                                                                                                                                                                                                                                                                                                                                                                                                                                                              |
| EPI_ISL_3182318,<br>EPI_ISL_3183905                                                                                                                                                                                                                                                                                                                                                                                                                                                                                                                                                                                                | Saitama Institute of Public Health                         | Saitama Institute of Public Health                                                            | Eri Aonuma; Hayato Ehara; Kentaro Itokawa; Makoto Kuroda; Masanori Hashino; Rina Tanaka; Satoshi Daisaki; Tsuyoshi Sekizuka                                                                                                                                                                                                     |                                                                                                                                                                                                                                                                                                                                                                                                                                                                                              |
| EPI_ISL_416525<br>EPI_ISL_416524                                                                                                                                                                                                                                                                                                                                                                                                                                                                                                                                                                                                   | Saitama Medical University                                 | Saitama Medical University                                                                    | Kazuo Imai                                                                                                                                                                                                                                                                                                                      |                                                                                                                                                                                                                                                                                                                                                                                                                                                                                              |
| EPI_ISL_684881, EPI_ISL_684908, EPI_ISL_684982, EPI_ISL_685006, EPI_ISL_685034, EPI_ISL_685077, EPI_ISL_685093, EPI_ISL_685116, EPI_ISL_686100, EPI_ISL_688363, EPI_ISL_1427352, EPI_ISL_1427455, EPI_ISL_1437618                                                                                                                                                                                                                                                                                                                                                                                                                  | see above                                                  | Saitama Medical University Hospital                                                           | Kazuo Imai                                                                                                                                                                                                                                                                                                                      |                                                                                                                                                                                                                                                                                                                                                                                                                                                                                              |
| see above                                                                                                                                                                                                                                                                                                                                                                                                                                                                                                                                                                                                                          | Saitama Prefectural Institute of Public Health             | Pathogen Genomics Center, National Institute of Infectious Diseases                           | Kentaro Itokawa; Makoto Kuroda; Masanori Hashino; Rina Tanaka; Tsuyoshi Sekizuka                                                                                                                                                                                                                                                |                                                                                                                                                                                                                                                                                                                                                                                                                                                                                              |
| EPI_ISL_479925,<br>EPI_ISL_688707,<br>EPI_ISL_692659,<br>EPI_ISL_692667                                                                                                                                                                                                                                                                                                                                                                                                                                                                                                                                                            | Sakai City Institute of Public Health                      | Pathogen Genomics Center, National Institute of Infectious Diseases                           | Hajime Kamiya; Kentaro Itokawa; Makoto Kuroda; Masanori Hashino; Motoi Suzuki; Rina Tanaka; Tatsuya Miyoshi; Tsuyoshi Sekizuka                                                                                                                                                                                                  |                                                                                                                                                                                                                                                                                                                                                                                                                                                                                              |
| EPI_ISL_2105859,<br>EPI_ISL_3277747                                                                                                                                                                                                                                                                                                                                                                                                                                                                                                                                                                                                | Salud Digna                                                | Instituto Nacional de Medicina Genómica                                                       | Abraham Campos-Romero; Cedro-Tanda A; Escobar-Arrazola; Escobar-Arrazola MA; Gonzalez-Barrera D; Herrera-Montalvo LA.; Hidalgo-Miranda A; Luna-Ruiz Marco; M; Mendoza-Vargas A; Moreno-Camacho José Luis; Munguia-Garza P; Ramirez-Vega O; Rangel-DeLeon D; Reyes-Grajeda JP; Rodriguez-Gallegos Jorge                          |                                                                                                                                                                                                                                                                                                                                                                                                                                                                                              |
| EPI_ISL_1164623                                                                                                                                                                                                                                                                                                                                                                                                                                                                                                                                                                                                                    | Salzkammergutklinikum Vöcklabruck, Institut für Pathologie | Salzkammergutklinikum Vöcklabruck, Institut für Pathologie                                    | Regina Stitz                                                                                                                                                                                                                                                                                                                    |                                                                                                                                                                                                                                                                                                                                                                                                                                                                                              |
| EPI_ISL_1795024,<br>EPI_ISL_2422752,<br>EPI_ISL_2422901,<br>EPI_ISL_2422971                                                                                                                                                                                                                                                                                                                                                                                                                                                                                                                                                        | San Diego County Public Health Laboratory                  | Andersen lab at Scripps Research                                                              | Brett Austin; Jovan Shephard; SEARCH Alliance San Diego with Ashleigh Murphy; SEARCH Alliance San Diego with Tracy Basler                                                                                                                                                                                                       |                                                                                                                                                                                                                                                                                                                                                                                                                                                                                              |
| EPI_ISL_1811238                                                                                                                                                                                                                                                                                                                                                                                                                                                                                                                                                                                                                    | San Isidro de Heredia                                      | Incienza, Instituto Costarricense de Investigación y Enseñanza en Nutrición y Salud           | Pérez-Corrales C & Fonseca-Muñoz R                                                                                                                                                                                                                                                                                              |                                                                                                                                                                                                                                                                                                                                                                                                                                                                                              |
| EPI_ISL_542360                                                                                                                                                                                                                                                                                                                                                                                                                                                                                                                                                                                                                     | San Matteo Hospital Pavia                                  | Dep. Of Oncology and Hemato-Oncology University of Milan                                      | Antonio Piralla; Carlo Federico Perno; Chiara Vismara; Claudia Alteri; Elisa Matarazzo; Fausto Baldanti; Federica Giardina; Federica Novazzi; Luna Colagrossi; Maria Antonello; Massimo Puoti; Monica Tallarita; Oscar Massimiliano Epis; Roberto Fumagalli; Silvia Renica; Stefano Galarsa; Valentino Costabile; Valeria Cento |                                                                                                                                                                                                                                                                                                                                                                                                                                                                                              |
| EPI_ISL_417318                                                                                                                                                                                                                                                                                                                                                                                                                                                                                                                                                                                                                     | Santa Clara County Public Health Department                | Chiu Laboratory, University of                                                                | Brandon Bonin; Debra A. Wadford; Elsa Villarino; Scot Federman; Wei Gu; Xianding Deng; and Charles Y. Chiu                                                                                                                                                                                                                      |                                                                                                                                                                                                                                                                                                                                                                                                                                                                                              |

|                                                                                                                                                                                                                                                                                                                                                                                       |                                                                                 |                                                                                                                                                                                           |                                                                                                                                                                                                                                                                                                                                                                                                                                        |
|---------------------------------------------------------------------------------------------------------------------------------------------------------------------------------------------------------------------------------------------------------------------------------------------------------------------------------------------------------------------------------------|---------------------------------------------------------------------------------|-------------------------------------------------------------------------------------------------------------------------------------------------------------------------------------------|----------------------------------------------------------------------------------------------------------------------------------------------------------------------------------------------------------------------------------------------------------------------------------------------------------------------------------------------------------------------------------------------------------------------------------------|
| EPI_ISL_1477925                                                                                                                                                                                                                                                                                                                                                                       | Santa Clara County Public Health Laboratory                                     | California, San Francisco<br>Chan-Zuckerberg Biohub                                                                                                                                       | CZB Cliahub Consortium                                                                                                                                                                                                                                                                                                                                                                                                                 |
| EPI_ISL_3219346,<br>EPI_ISL_3219402                                                                                                                                                                                                                                                                                                                                                   | Santa Clara Valley Medical Center                                               | Santa Clara County Public Health Laboratory                                                                                                                                               | Santa Clara County Public Health Department                                                                                                                                                                                                                                                                                                                                                                                            |
| EPI_ISL_479799,<br>EPI_ISL_479800                                                                                                                                                                                                                                                                                                                                                     | Sapporo City Institute of Public Health                                         | Pathogen Genomics Center,<br>National Institute of Infectious Diseases                                                                                                                    | Asami Ohnishi; Hajime Kamiya; Kentaro Itokawa; Makoto Kuroda; Masanori Hashino; Motoi Suzuki; Rina Tanaka; Tsuyoshi Sekizuka                                                                                                                                                                                                                                                                                                           |
| EPI_ISL_3183570,<br>EPI_ISL_3183573,<br>EPI_ISL_3183910                                                                                                                                                                                                                                                                                                                               | Sapporo City Institute of Public Health                                         | Sapporo City Institute of Public Health                                                                                                                                                   | Asami Ohnishi; Kentaro Itokawa; Makoto Kuroda; Masanori Hashino; Masayuki Kikuchi; Rie Shimazaki; Rina Tanaka; Tsuyoshi Sekizuka; Yusuke Oguchi                                                                                                                                                                                                                                                                                        |
| EPI_ISL_3230353,<br>EPI_ISL_3230436,<br>EPI_ISL_3230441                                                                                                                                                                                                                                                                                                                               | SataDiag                                                                        | Expert Microbiology, National Institute for Health and Welfare                                                                                                                            | Carita Savolainen-Kopra; Erika Lindh; Haider al-Hello; Jani Halkilahti; Kirsi Liitsola; Niina Ikonen; Olli Vapalahti; Pekka Ellonen; Phuoc Truong; Päivi Laurila; Ravi Kant; Sari Hannula; Soile Blomqvist; Teemu Smura                                                                                                                                                                                                                |
| EPI_ISL_661189                                                                                                                                                                                                                                                                                                                                                                        | Scientific Veterinary Institute Novi Sad                                        | Veterinary Specialized Institute "Kraljevo", Serbia                                                                                                                                       | Afonso, C.; Banovic Djeri, B.; Jankovic, M.; Jovanovic, T.; Knezevic, A.; Petrovic, T.; Sekler, M.; Tesovic, B.; Vidanovic, D.; Volkening, J.                                                                                                                                                                                                                                                                                          |
| EPI_ISL_437567,<br>EPI_ISL_1081561,<br>EPI_ISL_1969346,<br>EPI_ISL_3261702,<br>EPI_ISL_3261731,<br>EPI_ISL_3261733                                                                                                                                                                                                                                                                    | Scripps Medical Laboratory                                                      | Andersen lab at Scripps Research                                                                                                                                                          | Ellen Stefanski; Ian Mchardy; SEARCH Alliance San Diego with Michael Quigley                                                                                                                                                                                                                                                                                                                                                           |
| EPI_ISL_416462,<br>EPI_ISL_416466,<br>EPI_ISL_417163,<br>EPI_ISL_417165                                                                                                                                                                                                                                                                                                               | Seattle Flu Study                                                               | Seattle Flu Study                                                                                                                                                                         | Chu et al; Chu et al                                                                                                                                                                                                                                                                                                                                                                                                                   |
| EPI_ISL_1468446                                                                                                                                                                                                                                                                                                                                                                       | Secretaria Municipal de Saude de Birigui                                        | Instituto Adolfo Lutz, Interdisciplinary Procedures Center, Strategic Laboratory                                                                                                          | Caio Vinicius Dias Lopes; Claudia Regina Gonçalves; Claudio Tavares Sacchi; Erica Valessa Ramos Gomes; Karoline Rodrigues Campos                                                                                                                                                                                                                                                                                                       |
| EPI_ISL_417924                                                                                                                                                                                                                                                                                                                                                                        | Secretaría de Salud Medellín                                                    | Instituto Nacional de Salud, Universidad Cooperativa de Colombia, Instituto Alexander von Humboldt, Imperial College-London, London School of Hygiene & Tropical Medicine                 | Astrid C. Flórez; Carlos Franco-Muñoz; Christian Julian Villabona-Arenas; Diana Marcela Walteros-Acero; Diego A. Álvarez-Díaz; Erika Ospitia; Gloria Puerto; José A. Usme-Ciro; Juliana Barbosa; Katherine Laiton-Donato; Liz Villabona-Arenas; Luz Dary Rodríguez; Maily A. Gonzalez; Marcela Mercado-Reyes; Martha Lucia Ospina Martinez; Nicolás D. Franco-Sierra; Sergio Gomez Rangel; Sussy Echeverria-Londoño; Zulma M. Cucunubá |
| EPI_ISL_3230526                                                                                                                                                                                                                                                                                                                                                                       | Seinäjoen keskussairaala                                                        | Expert Microbiology, National Institute for Health and Welfare                                                                                                                            | Carita Savolainen-Kopra; Erika Lindh; Haider al-Hello; Jani Halkilahti; Kirsi Liitsola; Niina Ikonen; Olli Vapalahti; Pekka Ellonen; Phuoc Truong; Päivi Laurila; Ravi Kant; Sari Hannula; Soile Blomqvist; Teemu Smura                                                                                                                                                                                                                |
| EPI_ISL_408977                                                                                                                                                                                                                                                                                                                                                                        | Serology, Virology and OTDS Laboratories (SAVID), NSW Health Pathology Randwick | NSW Health Pathology - Institute of Clinical Pathology and Medical Research; Centre for Infectious Diseases and Microbiology Laboratory Services; Westmead Hospital; University of Sydney | Carter I; Chen SC; Eden J-S; Holmes EC; Kok J and Dwyer DE for the 2019-nCoV Study Group*; Maddocks S; O'Sullivan MV; Rahman H; Rawlinson W; Rockett R; Sintchenko V                                                                                                                                                                                                                                                                   |
| EPI_ISL_469283                                                                                                                                                                                                                                                                                                                                                                        | Service de Virologie Hôpital Saint-Louis                                        | Laboratory Cell Biology of Viral Infection-INSERM unit 944                                                                                                                                | Ali Amara; Constance Delaugerre; Laurent Meertens; Lucie Bonnet-Madin; Maud SALMONA; Séverine Mercier-Delarue                                                                                                                                                                                                                                                                                                                          |
| EPI_ISL_418233                                                                                                                                                                                                                                                                                                                                                                        | Service des Urgences                                                            | National Reference Center for Viruses of Respiratory Infections, Institut Pasteur, Paris                                                                                                  | Angela Brisebarre; Boukbeur; Etienne Simon-Lorière; Flora Donati; Marion Barbet; Maud Vanpeene; Mélanie Albert; Méline Bizard; Sylvie Behillil; Sylvie van der Werf; Vincent Enouf                                                                                                                                                                                                                                                     |
| EPI_ISL_414598                                                                                                                                                                                                                                                                                                                                                                        | Servicio Microbiología, Hospital Clínico Universitario, Valencia                | Sequencing and Bioinformatics Service and Molecular Epidemiology Research Group. FISABIO-Public Health.                                                                                   | David Navarro; Fernando Gonzalez-Candelas; Giuseppe D'Auria; Griselda De Marco; María Alma Bracho; Neris Garcia-Gonzalez                                                                                                                                                                                                                                                                                                               |
| EPI_ISL_414496                                                                                                                                                                                                                                                                                                                                                                        | Servicio Microbiología. Hospital Clínico Universitario. Valencia.               | Sequencing and Bioinformatics Service. Molecular Epidemiology Laboratory. FISABIO-Public Health                                                                                           | David Navarro; Fernando Gonzalez-Candelas; Giuseppe D'Auria; Griselda De Marco; María Alma Bracho; Neris Garcia-Gonzalez                                                                                                                                                                                                                                                                                                               |
| EPI_ISL_4274475, EPI_ISL_4274498, EPI_ISL_4274519, EPI_ISL_6425329, EPI_ISL_6469910, EPI_ISL_6565267, EPI_ISL_6565276                                                                                                                                                                                                                                                                 | see above                                                                       | Servicio Microbiología H.U. Dr. Negrin                                                                                                                                                    | Ana Bordes Benítez; Bartolomé Gómez Arroyo; Francisco Javier Chamizo López                                                                                                                                                                                                                                                                                                                                                             |
| EPI_ISL_2136042,<br>EPI_ISL_2136063,<br>EPI_ISL_2136069,<br>EPI_ISL_2140093                                                                                                                                                                                                                                                                                                           | Servicio Virosis Respiratorias-Departamento Virología-INEI                      | Instituto Nacional Enfermedades Infecciosas C.G.Malbran                                                                                                                                   | Avaro M.; Baumeister E.; Benedetti E.; Campos J.; Cisterna D.; Dattero ME; Lorenzo F.; Molina V.; Perandones C.; Poklepovich T.; Pontoriero A.; Russo M.; Tuduri E.                                                                                                                                                                                                                                                                    |
| EPI_ISL_6010015                                                                                                                                                                                                                                                                                                                                                                       | Servicio de Inmunología del Hospital Julio Perrando                             | Laboratorio de Biología Molecular, Instituto de Medicina Regional on behalf of 'Proyecto Argentino Interinstitucional de genómica de SARS-CoV-2' (PAIS Consortium)                        | Bettina Brusés; Florencia Vallejos Schulze; Griselda Oria; Horacio Lucero.; Javier Mussin; Laura Formichelli; María Delia Foussal; Melina Lorenzini Campos; Raúl Maximiliano Acevedo                                                                                                                                                                                                                                                   |
| EPI_ISL_3219100,<br>EPI_ISL_3219105,<br>EPI_ISL_3219116                                                                                                                                                                                                                                                                                                                               | Servicio de Microbiología Hospital Ramon y Cajal                                | Servicio de Microbiología Hospital Ramon y Cajal                                                                                                                                          | Galan JC; Martinez L. Abreu M; Ponce M; y Gonzalez-Alba JM                                                                                                                                                                                                                                                                                                                                                                             |
| EPI_ISL_416485                                                                                                                                                                                                                                                                                                                                                                        | Servicio de Microbiología. Consorcio Hospital General Universitario de Valencia | Sequencing and Bioinformatics Service and Molecular Epidemiology Research Group. FISABIO-Public Health                                                                                    | Concepcion Gimeno; Fernando Gonzalez-Candelas; Giuseppe D'Auria; Griselda De Marco; María Alma Bracho; María Dolores Ocete; Neris Garcia-Gonzalez                                                                                                                                                                                                                                                                                      |
| EPI_ISL_1393132, EPI_ISL_1393109, EPI_ISL_1393242, EPI_ISL_1745372, EPI_ISL_1745632, EPI_ISL_1746205, EPI_ISL_1746309, EPI_ISL_1746381, EPI_ISL_1746491, EPI_ISL_3265680, EPI_ISL_3265687, EPI_ISL_3265689, EPI_ISL_3265695, EPI_ISL_3265717, EPI_ISL_3265725, EPI_ISL_3265760, EPI_ISL_3265788, EPI_ISL_3265872, EPI_ISL_3265875, EPI_ISL_3265891, EPI_ISL_3265955, EPI_ISL_3265959, | see above                                                                       | Servicio de Microbiología Clínica (Complejo Hospitalario de Navarra, Pamplona)                                                                                                            | Ana Miqueleiz; Ana Navascués; Carmen Ezpeleta Baquedano                                                                                                                                                                                                                                                                                                                                                                                |
| EPI_ISL_1671552,<br>EPI_ISL_1786019                                                                                                                                                                                                                                                                                                                                                   | Servicio de Microbiología, Hospital Miguel Servet, Zaragoza                     | SeqCOVID-SPAIN consortium/IBV(CSIC)                                                                                                                                                       | Alexander Tristancho Baró; Ana Milagro; Antonio Rezusta López; Nieves Martínez Cameo and SeqCOVID-SPAIN consortium; Yolanda Gracia Grataloup                                                                                                                                                                                                                                                                                           |
| EPI_ISL_416484,<br>EPI_ISL_416486                                                                                                                                                                                                                                                                                                                                                     | Servicio de Microbiología. Consorcio Hospital General Universitario de Valencia | Sequencing and Bioinformatics Service and Molecular Epidemiology Research Group. FISABIO-Public Health                                                                                    | Concepcion Gimeno; Fernando Gonzalez-Candelas; Giuseppe D'Auria; Griselda De Marco; María Alma Bracho; María Dolores Ocete; Neris Garcia-Gonzalez                                                                                                                                                                                                                                                                                      |
| EPI_ISL_1786088,<br>EPI_ISL_1819064                                                                                                                                                                                                                                                                                                                                                   | Servicio de Microbiología. HRU de Málaga. Servicio Andaluz de Salud             | SeqCOVID-SPAIN consortium/IBV(CSIC)                                                                                                                                                       | Begoña Palop Borrás; Inmaculada de Toro Peinado; Mercedes Pérez Ruiz and SeqCOVID-SPAIN consortium; Mª Concepción Mediavilla Gradolph                                                                                                                                                                                                                                                                                                  |
| EPI_ISL_2135574                                                                                                                                                                                                                                                                                                                                                                       | Servicio de Microbiología. Hospital Clínico Universitario de Valencia           | SeqCOVID-SPAIN consortium/IBV(CSIC)                                                                                                                                                       | David Navarro Ortega; Eliseo Albert Vicent; Ignacio Torres and SeqCOVID-SPAIN consortium                                                                                                                                                                                                                                                                                                                                               |
| EPI_ISL_2135542                                                                                                                                                                                                                                                                                                                                                                       | Servicio de Microbiología. Hospital General Universitario de Castellón          | SeqCOVID-SPAIN consortium/IBV(CSIC)                                                                                                                                                       | María Dolores Tirado Balaguer and SeqCOVID-SPAIN consortium; Rosario Moreno Muñoz                                                                                                                                                                                                                                                                                                                                                      |
| EPI_ISL_1423748                                                                                                                                                                                                                                                                                                                                                                       | Servicio de Microbiología. Hospital Ramón y Cajal. (CIBERESP)                   | SeqCOVID-SPAIN consortium/IBV(CSIC)                                                                                                                                                       | Jose Mª González-Alba; Juan C Galán and SeqCOVID-SPAIN consortium; L. Olavarrieta; Val Fernández                                                                                                                                                                                                                                                                                                                                       |
| EPI_ISL_4442778                                                                                                                                                                                                                                                                                                                                                                       | Servicio de Microbiología. Hospital Universitario Doctor Peset                  | Virology Laboratory, FISABIO - Public Health, Generalitat Valenciana                                                                                                                      | Alessandra Franze; Beatriz Mengual-Chuliá; F. Xavier López-Labrador; Javier Díez-Domingo; José Miguel Nogueira; Juan Alberola Enguñados; Juan José Camarena Miñana; Laura Cano; Nuria Jiménez-Hernández; Ramón González Pellicer; Sandra García-Esteban                                                                                                                                                                                |

|                                                                                                                                                                                                                                                                                                                                                                                                                                                                                                                                                                                                                                                                                |                                                                                                                                              |                                                                                                                                                                                         |                                                                                                                                                                                                                                                                                                                                                                                                                                                                                                                                                                                                                                                                                                               |
|--------------------------------------------------------------------------------------------------------------------------------------------------------------------------------------------------------------------------------------------------------------------------------------------------------------------------------------------------------------------------------------------------------------------------------------------------------------------------------------------------------------------------------------------------------------------------------------------------------------------------------------------------------------------------------|----------------------------------------------------------------------------------------------------------------------------------------------|-----------------------------------------------------------------------------------------------------------------------------------------------------------------------------------------|---------------------------------------------------------------------------------------------------------------------------------------------------------------------------------------------------------------------------------------------------------------------------------------------------------------------------------------------------------------------------------------------------------------------------------------------------------------------------------------------------------------------------------------------------------------------------------------------------------------------------------------------------------------------------------------------------------------|
| EPI_ISL_1533718                                                                                                                                                                                                                                                                                                                                                                                                                                                                                                                                                                                                                                                                | Servico de Verificacao de Obitos Svo Guarulhos                                                                                               | Instituto Adolfo Lutz, Interdisciplinary Procedures Center, Strategic Laboratory                                                                                                        | Cao Vinicius Dias Lopes; Claudia Regina Gonçalves; Claudio Tavares Sacchi; Erica Valessa Ramos Gomes; Karoline Rodrigues Campos; Leonardo Jose Tadeu de Araujo                                                                                                                                                                                                                                                                                                                                                                                                                                                                                                                                                |
| EPI_ISL_3219462, EPI_ISL_3230223, EPI_ISL_3261009                                                                                                                                                                                                                                                                                                                                                                                                                                                                                                                                                                                                                              | Servizo de Microbiología. Complejo Hospitalario de Santiago de Compostela                                                                    | Servizo de Microbiología. Complejo Hospitalario de Santiago de Compostela                                                                                                               | Amparo Coira; Antonio Aguilera; Carlos García Riestra; Carlos García_Riestra; Daniel Navarro; Gema Barbeito; José Llovo; Laura Millán; Manuela Hernández; María Luisa Pérez del Molino; María Luisa Pérez_del_Molino; Mercedes Treviño; Rocío trastoy; Teresa Lopez Valiño; Teresa Lopez_Valiño; Xosé Costa                                                                                                                                                                                                                                                                                                                                                                                                   |
| EPI_ISL_4574545                                                                                                                                                                                                                                                                                                                                                                                                                                                                                                                                                                                                                                                                | Shakha Medical Mall Hospital                                                                                                                 | DeepSeq Nottingham                                                                                                                                                                      | Alex Tarr; C Patrick McClure; Christopher Moore; Fei Sang; Johnny Debebe; Jonathan Ball; Matthew Carlisle; Matthew Loose; Nadine Holmes; Paywast Jamal Jala; Sazan Qadir Maulud; Shalaw Sardar Faraj; Victoria Wright                                                                                                                                                                                                                                                                                                                                                                                                                                                                                         |
| EPI_ISL_414936, EPI_ISL_414938, EPI_ISL_414939                                                                                                                                                                                                                                                                                                                                                                                                                                                                                                                                                                                                                                 | Shandong Provincial Center for Disease Control and Prevention                                                                                | Beijing Institute of Microbiology and Epidemiology                                                                                                                                      | Bo Pang; Can-Fang Lin; Cun-Bao Li; Dian-Ming Kang; Feng Gao; Guo-Lin Wang; Jie Lei; Li-Jun Duan; Lin Yao; Mai-Juan Ma; Ming-Xiao Yao; Sheng-Xiang Ji; Wen-Kui Sun; Xiang-Na Zhao; Xiao Wei; Xiao-Li Zhang; Xiao-Lin Jiang; Yang Hang; Zeng-Qiang Kou                                                                                                                                                                                                                                                                                                                                                                                                                                                          |
| EPI_ISL_416318, EPI_ISL_416320, EPI_ISL_416321, EPI_ISL_416322, EPI_ISL_416323, EPI_ISL_416325, EPI_ISL_416329, EPI_ISL_416330, EPI_ISL_416332, EPI_ISL_416334, EPI_ISL_416336, EPI_ISL_416337, EPI_ISL_416339, EPI_ISL_416340, EPI_ISL_416341, EPI_ISL_416348, EPI_ISL_416349, EPI_ISL_416355, EPI_ISL_416361, EPI_ISL_416362, EPI_ISL_416364, EPI_ISL_416366, EPI_ISL_416367, EPI_ISL_416368, EPI_ISL_416369, EPI_ISL_416370, EPI_ISL_416372, EPI_ISL_416373, EPI_ISL_416380, EPI_ISL_416384, EPI_ISL_416387, EPI_ISL_416390, EPI_ISL_416394, EPI_ISL_416398, EPI_ISL_416399, EPI_ISL_416400, EPI_ISL_416402, EPI_ISL_416405, EPI_ISL_416406, EPI_ISL_416407, EPI_ISL_416409 | Shanghai Public Health Clinical Center, Shanghai Medical College, Fudan University                                                           | National Research Center for Translational Medicine (Shanghai), Ruijin Hospital affiliated to Shanghai Jiao Tong University School of Medicine & Shanghai Public Health Clinical Center | Gang Lu; Hongzhou Lu; Saijuan Chen; Shengyue Wang; Xiaonan Zhang; Yun Ling; Yun Tan                                                                                                                                                                                                                                                                                                                                                                                                                                                                                                                                                                                                                           |
| EPI_ISL_1295660, EPI_ISL_2422676, EPI_ISL_2422703, EPI_ISL_2422844, EPI_ISL_3215831, EPI_ISL_3215835, EPI_ISL_3215859, EPI_ISL_3215871, EPI_ISL_3215872, EPI_ISL_3215879, EPI_ISL_3215884, EPI_ISL_3215891, EPI_ISL_3215919, EPI_ISL_3215921, EPI_ISL_3216005, EPI_ISL_3261281, EPI_ISL_3261309, EPI_ISL_3261365, EPI_ISL_3261429, EPI_ISL_3261438, EPI_ISL_3261508                                                                                                                                                                                                                                                                                                            | see above                                                                                                                                    | Sharp HealthCare Laboratory                                                                                                                                                             | Andersen lab at Scripps Research<br>Art Mendoza; Cathy Woerle; Jacquelyn Berumen; Liam McGinnis; Omid Bakhtar; SEARCH Alliance San Diego with Aaron Harding                                                                                                                                                                                                                                                                                                                                                                                                                                                                                                                                                   |
| EPI_ISL_406594                                                                                                                                                                                                                                                                                                                                                                                                                                                                                                                                                                                                                                                                 | Shenzhen Key Laboratory of Pathogen and Immunity, National Clinical Research Center for Infectious Disease, Shenzhen Third People's Hospital | Shenzhen Key Laboratory of Pathogen and Immunity, National Clinical Research Center for Infectious Disease, Shenzhen Third People's Hospital                                            | Chenguang Shen; Haixia Zheng; Li Xing; Yang Yang; Yingxia Liu; Zhixiang Xu                                                                                                                                                                                                                                                                                                                                                                                                                                                                                                                                                                                                                                    |
| EPI_ISL_406592                                                                                                                                                                                                                                                                                                                                                                                                                                                                                                                                                                                                                                                                 | Shenzhen Third People's Hospital                                                                                                             | Shenzhen Key Laboratory of Pathogen and Immunity, National Clinical Research Center for Infectious Disease, Shenzhen Third People's Hospital                                            | Chenguang Shen; Haixia Zheng; Li Xing; Yang Yang; Yingxia Liu; Zhixiang Xu                                                                                                                                                                                                                                                                                                                                                                                                                                                                                                                                                                                                                                    |
| EPI_ISL_3191832                                                                                                                                                                                                                                                                                                                                                                                                                                                                                                                                                                                                                                                                | Shimane Prefectural Institute of Public Health and Environmental Science                                                                     | Shimane Prefectural Institute of Public Health and Environmental Science                                                                                                                | Aiko Fukuma; Kentaro Itokawa; Makoto Kuroda; Masanori Hashino; Naoki Fujisawa; Rie Onishi; Rina Tanaka; Tsuyoshi Sekizuka; Yurie Kanba                                                                                                                                                                                                                                                                                                                                                                                                                                                                                                                                                                        |
| EPI_ISL_3191118, EPI_ISL_3191121, EPI_ISL_3191124, EPI_ISL_3191143, EPI_ISL_3191158, EPI_ISL_3191673                                                                                                                                                                                                                                                                                                                                                                                                                                                                                                                                                                           | Shizuoka City Institute of Environmental Sciences and Public Health                                                                          | Shizuoka City Institute of Environmental Sciences and Public Health                                                                                                                     | Hirosato Ehara; Kenji Yagi; Kentaro Itokawa; Makoto Kuroda; Masanori Hashino; Rina Tanaka; Takaharu Maehta; Tsuyoshi Sekizuka; Yuji Kanazawa                                                                                                                                                                                                                                                                                                                                                                                                                                                                                                                                                                  |
| EPI_ISL_3957720                                                                                                                                                                                                                                                                                                                                                                                                                                                                                                                                                                                                                                                                | Siloam Hospital Jambi (SHJB)                                                                                                                 | Mochtar Riady Institute for Nanotechnology-Universitas Pelita Harapan; Eijkman Institute for Molecular Biology, National Research and Innovation Agency                                 | Aksar C Lages; Amin Soebandrio; David Rustandi; Edison Johar; Febi Andriani; Frilasita A Yudhaputri; Hidayat Trimarsanto; Irawan Yusuf; Iskandar Adnan; Ivet M Suriapranata; Juandy Jo; Khin Saw Myint; Lidwina Prialina; Lydia V. Panggalo; Muhammad Rezki Rasyak; Rinaldy Kusuma; Riska N Taufik; Rury M Wahyuni; Safarina G Mali; Sukma Oktavianthi; Tandry Meriyanti; Tri Shinta Kurniasih; Willy Agustine; Young O Lasasati                                                                                                                                                                                                                                                                              |
| EPI_ISL_3254829                                                                                                                                                                                                                                                                                                                                                                                                                                                                                                                                                                                                                                                                | Simple Laboratories                                                                                                                          | Gagnon Lab, Southern Illinois University                                                                                                                                                | Keith Gagnon                                                                                                                                                                                                                                                                                                                                                                                                                                                                                                                                                                                                                                                                                                  |
| EPI_ISL_410536, EPI_ISL_410537                                                                                                                                                                                                                                                                                                                                                                                                                                                                                                                                                                                                                                                 | Singapore General Hospital, Molecular Laboratory, Division of Pathology                                                                      | Programme in Emerging Infectious Diseases, Duke-NUS Medical School                                                                                                                      | Danielle E Anderson; Gavin JD Smith; Jayanthi Jayakumar; Jenny GH Low; Kian Sing Chan; Lynette LE Oon; Martin Linster; Shirin Kalimuddin; Yan Zhuang; Yvonne CF Su                                                                                                                                                                                                                                                                                                                                                                                                                                                                                                                                            |
| EPI_ISL_3267732                                                                                                                                                                                                                                                                                                                                                                                                                                                                                                                                                                                                                                                                | Sisonke - BARC SA                                                                                                                            | CERI, Centre for Epidemic Response and Innovation, Stellenbosch University & KRISP, KZN Research Innovation and Sequencing Platform                                                     | Gianhari Jennifer; Naidoo Yeshnee; Pillay Sureshnee; San James; Tegally Houriyah; Tshabuila Derek; Wilkinson Eduan; Yajna Ramphal; de Oliveira Tulio                                                                                                                                                                                                                                                                                                                                                                                                                                                                                                                                                          |
| EPI_ISL_475549                                                                                                                                                                                                                                                                                                                                                                                                                                                                                                                                                                                                                                                                 | Skovde/Unilabs                                                                                                                               | The Public Health Agency of Sweden                                                                                                                                                      | Anna Risberg; Anna-Malin Linde; Karin Tegmark-Wisell; Maria Lind Karlberg; Mattias Haukland; Olov Svartstrom; Oskar Karlsson Lindsjö; Reza Advani; Sandra Brodlesson; Shaman Muradrasoli                                                                                                                                                                                                                                                                                                                                                                                                                                                                                                                      |
| EPI_ISL_3238202, EPI_ISL_3238507                                                                                                                                                                                                                                                                                                                                                                                                                                                                                                                                                                                                                                               | Sonic - Bioscientia - MVZ Labor Saar GmbH                                                                                                    | Robert Koch Institute                                                                                                                                                                   |                                                                                                                                                                                                                                                                                                                                                                                                                                                                                                                                                                                                                                                                                                               |
| EPI_ISL_2115656                                                                                                                                                                                                                                                                                                                                                                                                                                                                                                                                                                                                                                                                | Sonic - Dr. Staber & Kollegen GmbH München                                                                                                   | Robert Koch Institute                                                                                                                                                                   |                                                                                                                                                                                                                                                                                                                                                                                                                                                                                                                                                                                                                                                                                                               |
| EPI_ISL_1148448, EPI_ISL_1436292, EPI_ISL_1842785                                                                                                                                                                                                                                                                                                                                                                                                                                                                                                                                                                                                                              | Sonic - Labor Staber Bayreuth                                                                                                                | Robert Koch Institute                                                                                                                                                                   |                                                                                                                                                                                                                                                                                                                                                                                                                                                                                                                                                                                                                                                                                                               |
| EPI_ISL_1354124, EPI_ISL_1436089, EPI_ISL_1639077, EPI_ISL_1844053, EPI_ISL_1847483, EPI_ISL_1847645, EPI_ISL_2125217, EPI_ISL_3238207                                                                                                                                                                                                                                                                                                                                                                                                                                                                                                                                         | see above                                                                                                                                    | Sonic - MVZ Medizinisches Labor Bremen GmbH                                                                                                                                             | Robert Koch Institute                                                                                                                                                                                                                                                                                                                                                                                                                                                                                                                                                                                                                                                                                         |
| EPI_ISL_1292198, EPI_ISL_1464783                                                                                                                                                                                                                                                                                                                                                                                                                                                                                                                                                                                                                                               | Sonora Quest Laboratories                                                                                                                    | TGen North                                                                                                                                                                              | "Jolene Bowers; Ashlyn Pfeiffer; Chris French; Darrin Lemmer; Dave Engelthaler; Hayley Yaglom; Heather Centner; The Arizona COVID Genomics Union (ACGU)"                                                                                                                                                                                                                                                                                                                                                                                                                                                                                                                                                      |
| EPI_ISL_2154632                                                                                                                                                                                                                                                                                                                                                                                                                                                                                                                                                                                                                                                                | South Super Highway Molecular Diagnostic Laboratory                                                                                          | Philippine Genome Center                                                                                                                                                                | Alethea R. de Guzman; Anna Ong-Lim; Arianne A. Zamora; Asia Louisa U. Chong; Benedict A. Maralit; Candice Francheska B. Tambaon; Carlo M. Lapid; Celia Carlos; Devon Ray Pacial; Edsel Maurice Salvaña; El King D. Morado; Eva Maria Cutiongco-de la Paz; Francis A. Tablizo; Irish Coleen A. Asin; Jaime C. Montoya; Jan Michael C. Yap; Jo-Hannah S. Ulaanes; John Q. Wong; Joshua Gregor A. Dizon; Juan Antonio R. Magalang; Karol Sophia Agape R. Padilla; Kenneth M. Kim; Kris P. Punayan; Marc Edsel C. Ayes; Marc Jerrone R. Castro; Maria Rosario Singh-Vergeire and Cynthia P. Saloma; Maria Sofia L. Yangzon; Marissa Alejandria; Razel Nikka M. Hao; Rianna Patricia S. Cruz; Sheila Mae M. Araiza |
| EPI_ISL_1857475                                                                                                                                                                                                                                                                                                                                                                                                                                                                                                                                                                                                                                                                | Southern Nevada Public Health Laboratory                                                                                                     | Southern Nevada Public Health Laboratory                                                                                                                                                | Michael Picker                                                                                                                                                                                                                                                                                                                                                                                                                                                                                                                                                                                                                                                                                                |
| EPI_ISL_1701371                                                                                                                                                                                                                                                                                                                                                                                                                                                                                                                                                                                                                                                                | Spital MŠneddorf AG                                                                                                                          | Institute of Medical Virology                                                                                                                                                           | Alexandra Trkola; Annette AudigZ; Cyril Shah; Gabriela Ziltener; Guido Bloemberg; Jon Huder; Jörg Bšni; Kevin Steiner; Maria Gr'nberg; Maryam Zaheri; Michael Huber; Riccarda Capaul; Stefan Schmutz; Verena Kufner                                                                                                                                                                                                                                                                                                                                                                                                                                                                                           |
| EPI_ISL_6564917                                                                                                                                                                                                                                                                                                                                                                                                                                                                                                                                                                                                                                                                | Spitalul Clinic Cai Ferate Timisoara                                                                                                         | "Stefan cel Mare" University Metagenomics Lab                                                                                                                                           | Gheorghita Puscaselu Roxana; Lobiuc Andrei                                                                                                                                                                                                                                                                                                                                                                                                                                                                                                                                                                                                                                                                    |
| EPI_ISL_6564905, EPI_ISL_6564942                                                                                                                                                                                                                                                                                                                                                                                                                                                                                                                                                                                                                                               | Spitalul Clinic de Boli Infectioase si Tropicale "Dr. Victor Babeş" Timișoara                                                                | "Stefan cel Mare" University Metagenomics Lab                                                                                                                                           | Gheorghita Puscaselu Roxana; Lobiuc Andrei                                                                                                                                                                                                                                                                                                                                                                                                                                                                                                                                                                                                                                                                    |
| EPI_ISL_6564826, EPI_ISL_6564832, EPI_ISL_6564979                                                                                                                                                                                                                                                                                                                                                                                                                                                                                                                                                                                                                              | Spitalul Clinic de Urgenta pentru Copii „Louis Turcanu” Timișoara                                                                            | "Stefan cel Mare" University Metagenomics Lab                                                                                                                                           | Gheorghita Puscaselu Roxana; Lobiuc Andrei                                                                                                                                                                                                                                                                                                                                                                                                                                                                                                                                                                                                                                                                    |
| EPI_ISL_1833442, EPI_ISL_1833538, EPI_ISL_1833633, EPI_ISL_1833660, EPI_ISL_1833681, EPI_ISL_1833696, EPI_ISL_1833735, EPI_ISL_1833749                                                                                                                                                                                                                                                                                                                                                                                                                                                                                                                                         | see above                                                                                                                                    | St George's University Hospitals NHS Foundation Trust                                                                                                                                   | COVID-19 Genomics UK (COG-UK) Consortium<br>Adam Witney; Cassie Pope; Irene Monahan; Joshua Taylor; Ken Laing; NgeeKeong Tan                                                                                                                                                                                                                                                                                                                                                                                                                                                                                                                                                                                  |
| EPI_ISL_3102110                                                                                                                                                                                                                                                                                                                                                                                                                                                                                                                                                                                                                                                                | St James's Hospital, Dublin 8, Ireland.                                                                                                      | ELDA biotech                                                                                                                                                                            | Brendan Crowley; Deirdre M. Broderick; Peter R. Flanagan                                                                                                                                                                                                                                                                                                                                                                                                                                                                                                                                                                                                                                                      |
| EPI_ISL_3185081, EPI_ISL_3186138, EPI_ISL_3186154, EPI_ISL_3186581, EPI_ISL_3186582                                                                                                                                                                                                                                                                                                                                                                                                                                                                                                                                                                                            | St Vincent's Pathology (SydPath)                                                                                                             | NSW Health Pathology - Institute of Clinical Pathology and Medical Research; Westmead Hospital; University of Sydney                                                                    | CIDM-PH et al.                                                                                                                                                                                                                                                                                                                                                                                                                                                                                                                                                                                                                                                                                                |
| EPI_ISL_3231576                                                                                                                                                                                                                                                                                                                                                                                                                                                                                                                                                                                                                                                                | Stadtspital Triemli                                                                                                                          | Institute of Medical Virology                                                                                                                                                           | Alexandra Trkola; Annette Audigé; Catharine Aquino; Cyril Shah; Daniel Ehrsam; Gabriela Ziltener; Guido Bloemberg; Hubert Rehrauer; Isabel Stürmer; Joel Wirz; Jon Huder; Jörg Böni; Kevin Steiner; Maria Grünberg; Maryam Zaheri; Michael Huber; Riccarda Capaul; Stefan Schmutz; Verena Kufner; Weihong Qi                                                                                                                                                                                                                                                                                                                                                                                                  |
| EPI_ISL_1424111, EPI_ISL_3236114, EPI_ISL_3236154                                                                                                                                                                                                                                                                                                                                                                                                                                                                                                                                                                                                                              | Stanford Health Care                                                                                                                         | Stanford University School of Medicine, Clinical Virology Laboratory                                                                                                                    | Becky Jjang; Bernadette Troung; ChunHong Huang; Daniel Solis; Fumiko Yamamoto; James Zehnder; Malaya K. Sahoo; Mamdouh Sibai; Michelle Verghese; Nathan Hammond; and Benjamin A. Pinsky                                                                                                                                                                                                                                                                                                                                                                                                                                                                                                                       |



|                                                                                                                                                                                                                                                                                                                                                                                                                                                                                                                                                                                                                                                                                                                                                                                                                                                                                                                                                                                                                                                                                                                                                                                                                                                                                                                                                                                                                                                                                                                                                                                                                                                                                                                                                                                                                                                                                                                 |                                                                                  |                                                                                                                       |                                                                                                                                                                                                                                                                                                                                                                                                                                                                                                                                                                                                                                                                                                                                                                                                                                                                                 |
|-----------------------------------------------------------------------------------------------------------------------------------------------------------------------------------------------------------------------------------------------------------------------------------------------------------------------------------------------------------------------------------------------------------------------------------------------------------------------------------------------------------------------------------------------------------------------------------------------------------------------------------------------------------------------------------------------------------------------------------------------------------------------------------------------------------------------------------------------------------------------------------------------------------------------------------------------------------------------------------------------------------------------------------------------------------------------------------------------------------------------------------------------------------------------------------------------------------------------------------------------------------------------------------------------------------------------------------------------------------------------------------------------------------------------------------------------------------------------------------------------------------------------------------------------------------------------------------------------------------------------------------------------------------------------------------------------------------------------------------------------------------------------------------------------------------------------------------------------------------------------------------------------------------------|----------------------------------------------------------------------------------|-----------------------------------------------------------------------------------------------------------------------|---------------------------------------------------------------------------------------------------------------------------------------------------------------------------------------------------------------------------------------------------------------------------------------------------------------------------------------------------------------------------------------------------------------------------------------------------------------------------------------------------------------------------------------------------------------------------------------------------------------------------------------------------------------------------------------------------------------------------------------------------------------------------------------------------------------------------------------------------------------------------------|
| EPI_ISL_3230387,<br>EPI_ISL_3230709                                                                                                                                                                                                                                                                                                                                                                                                                                                                                                                                                                                                                                                                                                                                                                                                                                                                                                                                                                                                                                                                                                                                                                                                                                                                                                                                                                                                                                                                                                                                                                                                                                                                                                                                                                                                                                                                             | TYKS, Kiilinen mikrobiologia                                                     | Expert Microbiology, National Institute for Health and Welfare                                                        | Carita Savolainen-Kopra; Erika Lindh; Haider al-Hello; Jani Haikilaiti; Kirsi Liitsola; Niina Ikonen; Olli Vapalahti; Pekka Ellonen; Phuoc Truong; Päivi Laurila; Ravi Kant; Sari Hannula; Soile Blomqvist; Teemu Smura                                                                                                                                                                                                                                                                                                                                                                                                                                                                                                                                                                                                                                                         |
| EPI_ISL_412969,<br>EPI_ISL_420889,<br>EPI_ISL_420890                                                                                                                                                                                                                                                                                                                                                                                                                                                                                                                                                                                                                                                                                                                                                                                                                                                                                                                                                                                                                                                                                                                                                                                                                                                                                                                                                                                                                                                                                                                                                                                                                                                                                                                                                                                                                                                            | Takayuki Hishiki Kanagawa Prefectural Institute of Public Health                 | Takayuki Hishiki Kanagawa Prefectural Institute of Public Health                                                      | An, T.; Hayashizaki; Hishiki, T.; Kawai, J.; Kogo, Y.; Matsuki, Y.; Sakuragi, J.; Suzuki, R.; Tanaka, Y.; Usui, K.; Y. and Takasaki, T.                                                                                                                                                                                                                                                                                                                                                                                                                                                                                                                                                                                                                                                                                                                                         |
| EPI_ISL_1754159,<br>EPI_ISL_3242771,<br>EPI_ISL_3268346,<br>EPI_ISL_3268356                                                                                                                                                                                                                                                                                                                                                                                                                                                                                                                                                                                                                                                                                                                                                                                                                                                                                                                                                                                                                                                                                                                                                                                                                                                                                                                                                                                                                                                                                                                                                                                                                                                                                                                                                                                                                                     | Tampa General Hospital Esoteric Lab                                              | Tampa General Hospital Esoteric Research & Development Lab                                                            | Amorce Lima; Deanna Becker; Dominic Uy; Grant Vestal; Jon Faughn; Jorge Mecias-Frias; Katie Hurlless; Marci O'Driscoll; Suzane Silbert; Vicki Healer                                                                                                                                                                                                                                                                                                                                                                                                                                                                                                                                                                                                                                                                                                                            |
| EPI_ISL_1591274                                                                                                                                                                                                                                                                                                                                                                                                                                                                                                                                                                                                                                                                                                                                                                                                                                                                                                                                                                                                                                                                                                                                                                                                                                                                                                                                                                                                                                                                                                                                                                                                                                                                                                                                                                                                                                                                                                 | Teaching Institute for Public Health of Varaždin County                          | Croatian Institute of Public Health                                                                                   | Irena Tabain; Ivana Ferenčak                                                                                                                                                                                                                                                                                                                                                                                                                                                                                                                                                                                                                                                                                                                                                                                                                                                    |
| EPI_ISL_529149,<br>EPI_ISL_529150                                                                                                                                                                                                                                                                                                                                                                                                                                                                                                                                                                                                                                                                                                                                                                                                                                                                                                                                                                                                                                                                                                                                                                                                                                                                                                                                                                                                                                                                                                                                                                                                                                                                                                                                                                                                                                                                               | Technology Centre, Guangzhou Customs                                             | Technology Centre, Guangzhou Customs                                                                                  | Dai, J.; Huang, J.; Huang, S.; Li, X.; Shi, Y.; Sun, F.; Sun, J.; Wang, Y.; Zhang, Z.; Zheng, K.; Zhu, .; Zhuang, Z.                                                                                                                                                                                                                                                                                                                                                                                                                                                                                                                                                                                                                                                                                                                                                            |
| EPI_ISL_412966                                                                                                                                                                                                                                                                                                                                                                                                                                                                                                                                                                                                                                                                                                                                                                                                                                                                                                                                                                                                                                                                                                                                                                                                                                                                                                                                                                                                                                                                                                                                                                                                                                                                                                                                                                                                                                                                                                  | Technology Centre, Guangzhou Customs                                             | Technology Centre, Guangzhou Customs                                                                                  | Huang; J. and Zhao, J.; Shi, Y.; Sun, J.; Zheng, K.                                                                                                                                                                                                                                                                                                                                                                                                                                                                                                                                                                                                                                                                                                                                                                                                                             |
| EPI_ISL_733577                                                                                                                                                                                                                                                                                                                                                                                                                                                                                                                                                                                                                                                                                                                                                                                                                                                                                                                                                                                                                                                                                                                                                                                                                                                                                                                                                                                                                                                                                                                                                                                                                                                                                                                                                                                                                                                                                                  | Temporary Specimen Collection Centre                                             | Hong Kong Department of Health                                                                                        | Alan K.L. Tsang; Dominic N.C. Tsang; Edman T.K. Lam; Peter C.W. Yip; Rickjason C.W. Chan                                                                                                                                                                                                                                                                                                                                                                                                                                                                                                                                                                                                                                                                                                                                                                                        |
| EPI_ISL_3019479                                                                                                                                                                                                                                                                                                                                                                                                                                                                                                                                                                                                                                                                                                                                                                                                                                                                                                                                                                                                                                                                                                                                                                                                                                                                                                                                                                                                                                                                                                                                                                                                                                                                                                                                                                                                                                                                                                 | Temporary Specimen Collection Centre at the AsiaWorld-Expo                       | Hong Kong Department of Health                                                                                        | Alan K.L. Tsang; Edman T.K. Lam; Ken H.L. Ng; Peter C.W. Yip; Rickjason C.W. Chan                                                                                                                                                                                                                                                                                                                                                                                                                                                                                                                                                                                                                                                                                                                                                                                               |
| EPI_ISL_411956                                                                                                                                                                                                                                                                                                                                                                                                                                                                                                                                                                                                                                                                                                                                                                                                                                                                                                                                                                                                                                                                                                                                                                                                                                                                                                                                                                                                                                                                                                                                                                                                                                                                                                                                                                                                                                                                                                  | Texas Department of State Health Services                                        | Panang Discovery, Respiratory Viruses Branch, Division of Viral Diseases, Centers for Diseases Control and Prevention | Anna Uehara; Brett L. Whitaker; Brian Lynch; Clinton R. Paden; Haibin Wang; Janna* R. Murray; Jing Zhang; Krista Queen; Lijuan Wang; Senthil Kumar K. Sakthivel; Shifaq Kamili; Stephen Lindstrom; Susan I. Gerber; Suxiang Tong; Xiaoyan Lu; Yan Li; Ying Tao                                                                                                                                                                                                                                                                                                                                                                                                                                                                                                                                                                                                                  |
| EPI_ISL_1225068                                                                                                                                                                                                                                                                                                                                                                                                                                                                                                                                                                                                                                                                                                                                                                                                                                                                                                                                                                                                                                                                                                                                                                                                                                                                                                                                                                                                                                                                                                                                                                                                                                                                                                                                                                                                                                                                                                 | Texas Department of State Health Services                                        | Texas Department of State Health Services                                                                             | Anita Pokharel; Bonnie Oh; Chun Wang; Grace Kubin; Jenny Zhang; Maliha Rahman; Mayela Pedrueza; Myong Koag; Rachel Lee; Rashmi Tuladhar                                                                                                                                                                                                                                                                                                                                                                                                                                                                                                                                                                                                                                                                                                                                         |
| EPI_ISL_1660595,<br>EPI_ISL_1760066,<br>EPI_ISL_1760073,<br>EPI_ISL_1760076                                                                                                                                                                                                                                                                                                                                                                                                                                                                                                                                                                                                                                                                                                                                                                                                                                                                                                                                                                                                                                                                                                                                                                                                                                                                                                                                                                                                                                                                                                                                                                                                                                                                                                                                                                                                                                     | Texas Department of State Health Services (TXDSHS)                               | Texas Department of State Health Services (TXDSHS)                                                                    | Anita Pokharel; Bonnie Oh; Chun Wang; Grace Kubin; Jenny Zhang; Lorraine Rodriguez; Maliha Rahman; Mayela Pedrueza; Myong Koag; Rachel Lee; Rashmi Tuladhar                                                                                                                                                                                                                                                                                                                                                                                                                                                                                                                                                                                                                                                                                                                     |
| EPI_ISL_1300420                                                                                                                                                                                                                                                                                                                                                                                                                                                                                                                                                                                                                                                                                                                                                                                                                                                                                                                                                                                                                                                                                                                                                                                                                                                                                                                                                                                                                                                                                                                                                                                                                                                                                                                                                                                                                                                                                                 | Texas Department of State Health Services - TXDSHS                               | Texas Department of State Health Services - TXDSHS                                                                    | Anita Pokharel; Bonnie Oh; Chun Wang; Grace Kubin; Jenny Zhang; Maliha Rahman; Mayela Pedrueza; Myong Koag; Rachel Lee; Rashmi Tuladhar                                                                                                                                                                                                                                                                                                                                                                                                                                                                                                                                                                                                                                                                                                                                         |
| EPI_ISL_1470701                                                                                                                                                                                                                                                                                                                                                                                                                                                                                                                                                                                                                                                                                                                                                                                                                                                                                                                                                                                                                                                                                                                                                                                                                                                                                                                                                                                                                                                                                                                                                                                                                                                                                                                                                                                                                                                                                                 | The Jackson Laboratory                                                           | The Jackson Laboratory                                                                                                | Adams M; Bergeron D; Kelly K; Li L; Omerza G; Renzette N                                                                                                                                                                                                                                                                                                                                                                                                                                                                                                                                                                                                                                                                                                                                                                                                                        |
| EPI_ISL_2188107,<br>EPI_ISL_2188243,<br>EPI_ISL_2188932                                                                                                                                                                                                                                                                                                                                                                                                                                                                                                                                                                                                                                                                                                                                                                                                                                                                                                                                                                                                                                                                                                                                                                                                                                                                                                                                                                                                                                                                                                                                                                                                                                                                                                                                                                                                                                                         | The Lord's Grace Medical and Industrial Clinic                                   | Philippine Genome Center                                                                                              | Alethea R. de Guzman; Anna Ong-Lim; Arianne A. Zamora; Asia Louisa U. Chong; Benedict A. Maralit; Candice Francheska B. Tamboano; Carlo M. Lapid; Celia Carlos; Devon Ray Pacial; Edsel Maurice Salvaña; El King D. Morado; Elcid Aaron R. Panglinan; Eva Maria Cutiungco-de la Paz; Francis A. Tablizo; Irish Coleen A. Asin; Jaime C. Montoya; Jan Michael C. Yap; Jo-Hannah S. Llames; John Q. Wong; Joshua Gregor A. Dizon; Juan Antonio R. Magalang; Karol Sophia Agape R. Padilla; Kenneth M. Kim; Kris P. Punayan; Marc Edsel C. Ayes; Marc Jerone R. Castro; Maria Rosario Singh-Vergeire and Cynthia P. Saloma; Maria Sofia L. Yangzon; Marissa Alejandria; Razel Nikka M. Hao; Renato Jacinto Q. Mantaring; Rianna Patricia S. Cruz; Sheila Mae M. Araiza                                                                                                             |
| EPI_ISL_2189226,<br>EPI_ISL_2189231                                                                                                                                                                                                                                                                                                                                                                                                                                                                                                                                                                                                                                                                                                                                                                                                                                                                                                                                                                                                                                                                                                                                                                                                                                                                                                                                                                                                                                                                                                                                                                                                                                                                                                                                                                                                                                                                             | The Medical City                                                                 | Philippine Genome Center                                                                                              | Alethea R. de Guzman; Anna Ong-Lim; Arianne A. Zamora; Asia Louisa U. Chong; Benedict A. Maralit; Candice Francheska B. Tamboano; Carlo M. Lapid; Celia Carlos; Devon Ray Pacial; Edsel Maurice Salvaña; El King D. Morado; Elcid Aaron R. Panglinan; Eva Maria Cutiungco-de la Paz; Francis A. Tablizo; Irish Coleen A. Asin; Jaime C. Montoya; Jan Michael C. Yap; Jo-Hannah S. Llames; John Q. Wong; Joshua Gregor A. Dizon; Juan Antonio R. Magalang; Karol Sophia Agape R. Padilla; Kenneth M. Kim; Kris P. Punayan; Marc Edsel C. Ayes; Maria Rosario Singh-Vergeire and Cynthia P. Saloma; Maria Sofia L. Yangzon; Marissa Alejandria; Razel Nikka M. Hao; Renato Jacinto Q. Mantaring; Rianna Patricia S. Cruz; Sheila Mae M. Araiza                                                                                                                                    |
| EPI_ISL_2155696,<br>EPI_ISL_2156416,<br>EPI_ISL_2188083                                                                                                                                                                                                                                                                                                                                                                                                                                                                                                                                                                                                                                                                                                                                                                                                                                                                                                                                                                                                                                                                                                                                                                                                                                                                                                                                                                                                                                                                                                                                                                                                                                                                                                                                                                                                                                                         | The Medical City -Á Ortigas                                                      | Philippine Genome Center                                                                                              | Alethea R. de Guzman; Anna Ong-Lim; Arianne A. Zamora; Asia Louisa U. Chong; Benedict A. Maralit; Candice Francheska B. Tamboano; Carlo M. Lapid; Celia Carlos; Devon Ray Pacial; Edsel Maurice Salvaña; El King D. Morado; Elcid Aaron R. Panglinan; Eva Maria Cutiungco-de la Paz; Francis A. Tablizo; Irish Coleen A. Asin; Jaime C. Montoya; Jan Michael C. Yap; Jo-Hannah S. Llames; John Q. Wong; Joshua Gregor A. Dizon; Juan Antonio R. Magalang; Karol Sophia Agape R. Padilla; Kenneth M. Kim; Kris P. Punayan; Marc Edsel C. Ayes; Marc Jerone R. Castro; Maria Rosario Singh-Vergeire and Cynthia P. Saloma; Maria Sofia L. Yangzon; Marissa Alejandria; Razel Nikka M. Hao; Rianna Patricia S. Cruz; Sheila Mae M. Araiza                                                                                                                                          |
| EPI_ISL_660572                                                                                                                                                                                                                                                                                                                                                                                                                                                                                                                                                                                                                                                                                                                                                                                                                                                                                                                                                                                                                                                                                                                                                                                                                                                                                                                                                                                                                                                                                                                                                                                                                                                                                                                                                                                                                                                                                                  | The National Institute of Public Health                                          | State Veterinary Institute Prague                                                                                     | A; D; H; J; Jirincova; L; Nagy; Novakova; Trnka; Vecerova                                                                                                                                                                                                                                                                                                                                                                                                                                                                                                                                                                                                                                                                                                                                                                                                                       |
| EPI_ISL_414477                                                                                                                                                                                                                                                                                                                                                                                                                                                                                                                                                                                                                                                                                                                                                                                                                                                                                                                                                                                                                                                                                                                                                                                                                                                                                                                                                                                                                                                                                                                                                                                                                                                                                                                                                                                                                                                                                                  | The National Institute of Public Health Center for Epidemiology and Microbiology | State Veterinary Institute Prague                                                                                     | Alexander Nagy; Dusan Trnka; Helena Jirincova; Jaromira Vecerova; Klara Labska; Ludmila Novakova; Oldrich Bartos; Olga Storkanova                                                                                                                                                                                                                                                                                                                                                                                                                                                                                                                                                                                                                                                                                                                                               |
| EPI_ISL_417555, EPI_ISL_417556, EPI_ISL_417557, EPI_ISL_417560, EPI_ISL_417563, EPI_ISL_417565, EPI_ISL_417566, EPI_ISL_417567, EPI_ISL_417571, EPI_ISL_417572, EPI_ISL_417575, EPI_ISL_417580, EPI_ISL_417584, EPI_ISL_417587, EPI_ISL_417588, EPI_ISL_417592, EPI_ISL_417595, EPI_ISL_417598, EPI_ISL_417599, EPI_ISL_417601, EPI_ISL_417603, EPI_ISL_417604, EPI_ISL_417605, EPI_ISL_417606, EPI_ISL_417607, EPI_ISL_417608, EPI_ISL_417609, EPI_ISL_417611, EPI_ISL_417616, EPI_ISL_417613, EPI_ISL_417615, EPI_ISL_417616, EPI_ISL_417620, EPI_ISL_417621, EPI_ISL_417622, EPI_ISL_417623, EPI_ISL_417625, EPI_ISL_417626, EPI_ISL_417628, EPI_ISL_417631, EPI_ISL_417637, EPI_ISL_417638, EPI_ISL_417640, EPI_ISL_417641, EPI_ISL_417644, EPI_ISL_417648, EPI_ISL_417650, EPI_ISL_417651, EPI_ISL_417652, EPI_ISL_417675, EPI_ISL_417680, EPI_ISL_417682, EPI_ISL_417683, EPI_ISL_417684, EPI_ISL_417694, EPI_ISL_417695, EPI_ISL_417696, EPI_ISL_417697, EPI_ISL_417701, EPI_ISL_417704, EPI_ISL_417711, EPI_ISL_417712, EPI_ISL_417713, EPI_ISL_417715, EPI_ISL_417716, EPI_ISL_417717, EPI_ISL_417718, EPI_ISL_417721, EPI_ISL_417722, EPI_ISL_417724, EPI_ISL_417725, EPI_ISL_417727, EPI_ISL_417732, EPI_ISL_417735, EPI_ISL_417738, EPI_ISL_417743, EPI_ISL_417744, EPI_ISL_417750, EPI_ISL_417755, EPI_ISL_417759, EPI_ISL_417762, EPI_ISL_417765, EPI_ISL_417766, EPI_ISL_417775, EPI_ISL_417777, EPI_ISL_417784, EPI_ISL_417787, EPI_ISL_417792, EPI_ISL_417796, EPI_ISL_417797, EPI_ISL_417799, EPI_ISL_417800, EPI_ISL_417804, EPI_ISL_417806, EPI_ISL_417815, EPI_ISL_417820, EPI_ISL_417825, EPI_ISL_417826, EPI_ISL_417830, EPI_ISL_417841, EPI_ISL_417843, EPI_ISL_417845, EPI_ISL_417846, EPI_ISL_417849, EPI_ISL_417850, EPI_ISL_417852, EPI_ISL_417855, EPI_ISL_417857, EPI_ISL_417862, EPI_ISL_417867, EPI_ISL_417871, EPI_ISL_417872, EPI_ISL_417873, EPI_ISL_417874, EPI_ISL_424525, |                                                                                  |                                                                                                                       |                                                                                                                                                                                                                                                                                                                                                                                                                                                                                                                                                                                                                                                                                                                                                                                                                                                                                 |
| see above                                                                                                                                                                                                                                                                                                                                                                                                                                                                                                                                                                                                                                                                                                                                                                                                                                                                                                                                                                                                                                                                                                                                                                                                                                                                                                                                                                                                                                                                                                                                                                                                                                                                                                                                                                                                                                                                                                       | The National University Hospital of Iceland                                      | deCODE genetics                                                                                                       | Agnar Helgason; Alma Moller; Arna B Agustsdottir; Arnaldur Gylfason; Asgeir Sigurdsson; Aslaug Jonasdottir; Berglind Eiriksdottir; Bjarni Thorbjornsson; Brynjar O Jansson; Daniel F Gudbjartsson; Droplaug N Magnúsdottir; Elisabet E Gardarsdottir; Emil A Thorarensen; Gardar Sveinbjornsson; Gisli Masson; Gudmundur Georgsson; Gudmundur L Norddahl; Gudrun Sigmundsdottir; Hakon Jonsson; Hannes Eggertsson; Hilma Holm; Ingileif Jonsdottir; Jona Saemundsdottir; Kamilla S Josefsdottir; Kari Stefansson; Karl G Kristinnsson; Kjartan R Gudmundsson; Kristin E Sveinsdottir; Kristin E Sveinsdottir; Louise le Roux; Maud Sveinsdottir; Olafia S Gretarsdottir; Olafia S Gretarsdottir; Olafur T Magnusson; Pall Melsted; Patrick Sulem; Run Fridriksdottir; Solvi Rognvaldsson; Thora R Gunnarsdottir; Thorur Kristjansson; Thorurur Gudnason; Unnur Thorsteinsdottir |
| EPI_ISL_2153732                                                                                                                                                                                                                                                                                                                                                                                                                                                                                                                                                                                                                                                                                                                                                                                                                                                                                                                                                                                                                                                                                                                                                                                                                                                                                                                                                                                                                                                                                                                                                                                                                                                                                                                                                                                                                                                                                                 | The Ohio State University Applied Microbiology Services Laboratory               | The Ohio State University Applied Microbiology Services Laboratory                                                    | Seth A. Faith PhD                                                                                                                                                                                                                                                                                                                                                                                                                                                                                                                                                                                                                                                                                                                                                                                                                                                               |
| EPI_ISL_4298670                                                                                                                                                                                                                                                                                                                                                                                                                                                                                                                                                                                                                                                                                                                                                                                                                                                                                                                                                                                                                                                                                                                                                                                                                                                                                                                                                                                                                                                                                                                                                                                                                                                                                                                                                                                                                                                                                                 | The University of Tokyo Hospital                                                 | The University of Tokyo Hospital                                                                                      | Kyoji Moriya; Sohei Harada; Yuki Ohama                                                                                                                                                                                                                                                                                                                                                                                                                                                                                                                                                                                                                                                                                                                                                                                                                                          |
| EPI_ISL_6490477,<br>EPI_ISL_6603673,<br>EPI_ISL_6841888                                                                                                                                                                                                                                                                                                                                                                                                                                                                                                                                                                                                                                                                                                                                                                                                                                                                                                                                                                                                                                                                                                                                                                                                                                                                                                                                                                                                                                                                                                                                                                                                                                                                                                                                                                                                                                                         | The Virology lab, Hiroshima University                                           | The Cellular and Molecular Biology lab, Hiroshima University                                                          | Hidetoshi Tahara; Miuko Kurose; Miyuki Kanda; Saori Fukunaga; Takemasa Sakaguchi; Tomoko Morita; Toshihito Nomura                                                                                                                                                                                                                                                                                                                                                                                                                                                                                                                                                                                                                                                                                                                                                               |
| EPI_ISL_6603671                                                                                                                                                                                                                                                                                                                                                                                                                                                                                                                                                                                                                                                                                                                                                                                                                                                                                                                                                                                                                                                                                                                                                                                                                                                                                                                                                                                                                                                                                                                                                                                                                                                                                                                                                                                                                                                                                                 | The Virology lab, Hiroshima University                                           | The Virology lab, Hiroshima University                                                                                | Miuko Kurose; Takemasa Sakaguchi; Tomoko Morita; Toshihito Nomura                                                                                                                                                                                                                                                                                                                                                                                                                                                                                                                                                                                                                                                                                                                                                                                                               |
| EPI_ISL_1708381                                                                                                                                                                                                                                                                                                                                                                                                                                                                                                                                                                                                                                                                                                                                                                                                                                                                                                                                                                                                                                                                                                                                                                                                                                                                                                                                                                                                                                                                                                                                                                                                                                                                                                                                                                                                                                                                                                 | Thindlu PHC                                                                      | inStem NCBS - INSACOG                                                                                                 | Uma Ramakrishnan Dasaradhi Palakodeti Aswin SaiNarain                                                                                                                                                                                                                                                                                                                                                                                                                                                                                                                                                                                                                                                                                                                                                                                                                           |
| EPI_ISL_3332734                                                                                                                                                                                                                                                                                                                                                                                                                                                                                                                                                                                                                                                                                                                                                                                                                                                                                                                                                                                                                                                                                                                                                                                                                                                                                                                                                                                                                                                                                                                                                                                                                                                                                                                                                                                                                                                                                                 | Tokyo Medical and Dental University                                              | Tokyo Medical and Dental University                                                                                   | Akinori Kimura; Hiroaki Takeuchi; Kousuke Tanimoto; Yoko Nukui; Yukie Tanaka                                                                                                                                                                                                                                                                                                                                                                                                                                                                                                                                                                                                                                                                                                                                                                                                    |
| EPI_ISL_685433,<br>EPI_ISL_685971,<br>EPI_ISL_688601                                                                                                                                                                                                                                                                                                                                                                                                                                                                                                                                                                                                                                                                                                                                                                                                                                                                                                                                                                                                                                                                                                                                                                                                                                                                                                                                                                                                                                                                                                                                                                                                                                                                                                                                                                                                                                                            | Tokyo Metropolitan Institute of Public Health                                    | Pathogen Genomics Center, National Institute of Infectious Diseases                                                   | Kentaro Itokawa; Makoto Kuroda; Masanori Hashino; Rina Tanaka; Tsuyoshi Sekizuka                                                                                                                                                                                                                                                                                                                                                                                                                                                                                                                                                                                                                                                                                                                                                                                                |
| EPI_ISL_6603722                                                                                                                                                                                                                                                                                                                                                                                                                                                                                                                                                                                                                                                                                                                                                                                                                                                                                                                                                                                                                                                                                                                                                                                                                                                                                                                                                                                                                                                                                                                                                                                                                                                                                                                                                                                                                                                                                                 | Tokyo Metropolitan Institute of Public Health                                    | Tokyo Metropolitan Institute of Public Health                                                                         | Akane Negishi; Arisa Amano; Hirofumi Miyake; Jun Suzuki; Kenji Sadamasu; Kenshirou Kuroki; Mami Nagashima; Masaki Hayashi; Maya Isogai; Takako Yamazaki; Takushi Fujiwara                                                                                                                                                                                                                                                                                                                                                                                                                                                                                                                                                                                                                                                                                                       |
| EPI_ISL_3191766                                                                                                                                                                                                                                                                                                                                                                                                                                                                                                                                                                                                                                                                                                                                                                                                                                                                                                                                                                                                                                                                                                                                                                                                                                                                                                                                                                                                                                                                                                                                                                                                                                                                                                                                                                                                                                                                                                 | Tottori Prefectural Institute of Public Health and Environmental Science         | Tottori Prefectural Institute of Public Health and Environmental Science                                              | Eiji Okuda; Kentaro Itokawa; Makoto Kuroda; Masanori Hashino; Rei Ootomo; Rina Tanaka; Tsuyoshi Sekizuka; Yutaka Ueda                                                                                                                                                                                                                                                                                                                                                                                                                                                                                                                                                                                                                                                                                                                                                           |
| EPI_ISL_3191390,<br>EPI_ISL_3191391,<br>EPI_ISL_3191396,<br>EPI_ISL_3191399                                                                                                                                                                                                                                                                                                                                                                                                                                                                                                                                                                                                                                                                                                                                                                                                                                                                                                                                                                                                                                                                                                                                                                                                                                                                                                                                                                                                                                                                                                                                                                                                                                                                                                                                                                                                                                     | Toyama Institute of Health                                                       | Toyama Institute of Health                                                                                            | Emiko Igarashi; Hideki Tani; Kazunori Oishi; Kentaro Itokawa; Makoto Kuroda; Masae Itamochi; Masanori Hashino; Noriko Inasaki; Rina Tanaka; Shunsuke Yazawa; Sumiyo Hasegawa; Tsuyoshi Sekizuka; Yumiko Saga                                                                                                                                                                                                                                                                                                                                                                                                                                                                                                                                                                                                                                                                    |
| EPI_ISL_3274248, EPI_ISL_3274629, EPI_ISL_3274640, EPI_ISL_3274641, EPI_ISL_3274643, EPI_ISL_3274644, EPI_ISL_3274663, EPI_ISL_3274685, EPI_ISL_3274700                                                                                                                                                                                                                                                                                                                                                                                                                                                                                                                                                                                                                                                                                                                                                                                                                                                                                                                                                                                                                                                                                                                                                                                                                                                                                                                                                                                                                                                                                                                                                                                                                                                                                                                                                         | TriCore Reference Laboratories                                                   | Center for Global Health, University of New Mexico Health Sciences Center                                             | Cecilia Thompson; Darrell Dinwiddie; Daryl Domman; Karissa Culbreath; Kendra Pesko; Kurt Schwaln; Valerie Morley                                                                                                                                                                                                                                                                                                                                                                                                                                                                                                                                                                                                                                                                                                                                                                |
| EPI_ISL_3235645                                                                                                                                                                                                                                                                                                                                                                                                                                                                                                                                                                                                                                                                                                                                                                                                                                                                                                                                                                                                                                                                                                                                                                                                                                                                                                                                                                                                                                                                                                                                                                                                                                                                                                                                                                                                                                                                                                 | Tripler Army Medical Center                                                      | Tripler Army Medical Center                                                                                           | Catherine Uyebara; Jonathan D'Ambrico; Kendra Carter; Rachael Downham                                                                                                                                                                                                                                                                                                                                                                                                                                                                                                                                                                                                                                                                                                                                                                                                           |
| EPI_ISL_3217076,<br>EPI_ISL_3217090                                                                                                                                                                                                                                                                                                                                                                                                                                                                                                                                                                                                                                                                                                                                                                                                                                                                                                                                                                                                                                                                                                                                                                                                                                                                                                                                                                                                                                                                                                                                                                                                                                                                                                                                                                                                                                                                             | Tulare County Public Health Laboratory                                           | Tulare County Public Health Laboratory                                                                                | Denise L Lopez; Joshua Kootstra                                                                                                                                                                                                                                                                                                                                                                                                                                                                                                                                                                                                                                                                                                                                                                                                                                                 |
| EPI_ISL_3184320, EPI_ISL_3184324, EPI_ISL_3184335, EPI_ISL_3184406, EPI_ISL_3184410, EPI_ISL_3184412, EPI_ISL_3184419, EPI_ISL_3184424, EPI_ISL_3184431, EPI_ISL_3184440, EPI_ISL_3184460, EPI_ISL_3184462, EPI_ISL_3184488, EPI_ISL_3184506, EPI_ISL_3184509, EPI_ISL_3184516, EPI_ISL_3184554, EPI_ISL_3184568, EPI_ISL_3184570, EPI_ISL_3184575, EPI_ISL_3184602, EPI_ISL_3184656, EPI_ISL_3184676, EPI_ISL_3184691, EPI_ISL_3184768, EPI_ISL_3184769, EPI_ISL_3184872, EPI_ISL_3185259, EPI_ISL_3185269, EPI_ISL_3185270, EPI_ISL_3185297, EPI_ISL_3185312, EPI_ISL_3185319, EPI_ISL_3185327, EPI_ISL_3185339, EPI_ISL_3185345, EPI_ISL_3185349, EPI_ISL_3185357, EPI_ISL_3185359, EPI_ISL_3185370, EPI_ISL_3185377, EPI_ISL_3214654, EPI_ISL_3214669, EPI_ISL_3214688, EPI_ISL_3215032, EPI_ISL_3215037, EPI_ISL_3215045, EPI_ISL_3215052, EPI_ISL_3215065, EPI_ISL_3215097, EPI_ISL_3215100, EPI_ISL_3215107, EPI_ISL_3215114, EPI_ISL_3215134, EPI_ISL_3215173, EPI_ISL_3215178, EPI_ISL_3215202, EPI_ISL_3215216, EPI_ISL_3215217, EPI_ISL_3215233, EPI_ISL_3215246, EPI_ISL_3215258, EPI_ISL_3215287, EPI_ISL_3215293, EPI_ISL_3266261, EPI_ISL_3266262, EPI_ISL_3266280, EPI_ISL_3266317, EPI_ISL_3266329, EPI_ISL_3266332, EPI_ISL_3266335, EPI_ISL_3266356, EPI_ISL_3266687, EPI_ISL_3266725, EPI_ISL_3266747, EPI_ISL_3266759, EPI_ISL_3266810, EPI_ISL_3266825, EPI_ISL_3270546, EPI_ISL_3270572, EPI_ISL_3270589                                                                                                                                                                                                                                                                                                                                                                                                                                                                                 |                                                                                  |                                                                                                                       |                                                                                                                                                                                                                                                                                                                                                                                                                                                                                                                                                                                                                                                                                                                                                                                                                                                                                 |
| see above                                                                                                                                                                                                                                                                                                                                                                                                                                                                                                                                                                                                                                                                                                                                                                                                                                                                                                                                                                                                                                                                                                                                                                                                                                                                                                                                                                                                                                                                                                                                                                                                                                                                                                                                                                                                                                                                                                       | U.O. Microbiologia Laboratorio Unico Centro Servizi - AUSL della Romagna         | U.O. Microbiologia, Laboratorio Unico Centro Servizi - AUSL della Romagna                                             | Giorgio Dirani                                                                                                                                                                                                                                                                                                                                                                                                                                                                                                                                                                                                                                                                                                                                                                                                                                                                  |
| EPI_ISL_2614998                                                                                                                                                                                                                                                                                                                                                                                                                                                                                                                                                                                                                                                                                                                                                                                                                                                                                                                                                                                                                                                                                                                                                                                                                                                                                                                                                                                                                                                                                                                                                                                                                                                                                                                                                                                                                                                                                                 | UAB "Baltic Medics"                                                              | National Public Health Surveillance Laboratory                                                                        | Ana Steponkiene; Danas Baksa; Jelena Razmuk; Lukas Vasionis; Lukas Zemaits; Migle Gabrielaitė; Svajune Muralyte                                                                                                                                                                                                                                                                                                                                                                                                                                                                                                                                                                                                                                                                                                                                                                 |
| EPI_ISL_3189958                                                                                                                                                                                                                                                                                                                                                                                                                                                                                                                                                                                                                                                                                                                                                                                                                                                                                                                                                                                                                                                                                                                                                                                                                                                                                                                                                                                                                                                                                                                                                                                                                                                                                                                                                                                                                                                                                                 | UAB "Rezus.It"                                                                   | National Public Health Surveillance Laboratory                                                                        | Ana Steponkiene; Danas Baksa; Jelena Razmuk; Lukas Vasionis; Lukas Zemaits; Migle Gabrielaitė; Svajune Muralyte                                                                                                                                                                                                                                                                                                                                                                                                                                                                                                                                                                                                                                                                                                                                                                 |

|                                                                                                 |                                                                                               |                                                                                                |                                                                                                                                                                                                                                                                                                                                                                                                                                                                                                                                                                                                                                                                                                                                                                                                                                                                                                                                                                                                                                                                                                                                                                                                                                                                                                                                                                                                                                                                                                                                                                                                                        |
|-------------------------------------------------------------------------------------------------|-----------------------------------------------------------------------------------------------|------------------------------------------------------------------------------------------------|------------------------------------------------------------------------------------------------------------------------------------------------------------------------------------------------------------------------------------------------------------------------------------------------------------------------------------------------------------------------------------------------------------------------------------------------------------------------------------------------------------------------------------------------------------------------------------------------------------------------------------------------------------------------------------------------------------------------------------------------------------------------------------------------------------------------------------------------------------------------------------------------------------------------------------------------------------------------------------------------------------------------------------------------------------------------------------------------------------------------------------------------------------------------------------------------------------------------------------------------------------------------------------------------------------------------------------------------------------------------------------------------------------------------------------------------------------------------------------------------------------------------------------------------------------------------------------------------------------------------|
| EPI_ISL_1960446,<br>EPI_ISL_1960449,<br>EPI_ISL_1960452,<br>EPI_ISL_2615016                     | UAB Diagnostikos laboratorija                                                                 | National Public Health Surveillance Laboratory                                                 | Ana Steponkiene; Danas Baksa; Jelena Razmuk; Lukas Vasionis; Lukas Zemaits; Migle Gabrielaite; Svajune Muralyte                                                                                                                                                                                                                                                                                                                                                                                                                                                                                                                                                                                                                                                                                                                                                                                                                                                                                                                                                                                                                                                                                                                                                                                                                                                                                                                                                                                                                                                                                                        |
| EPI_ISL_2614780,<br>EPI_ISL_2614965                                                             | UAB InMedica                                                                                  | National Public Health Surveillance Laboratory                                                 | Ana Steponkiene; Danas Baksa; Jelena Razmuk; Lukas Vasionis; Lukas Zemaits; Migle Gabrielaite; Svajune Muralyte                                                                                                                                                                                                                                                                                                                                                                                                                                                                                                                                                                                                                                                                                                                                                                                                                                                                                                                                                                                                                                                                                                                                                                                                                                                                                                                                                                                                                                                                                                        |
| EPI_ISL_1398403                                                                                 | UAB InMedica                                                                                  | Vilnius University Hospital Santaros Klinikos, Center of Laboratory Medicine                   | Daniel Naumovas; Dovile Ezerskyte; Gytis Dudas; Ingrida Olendraite; Laimonas Griskevicius; Ligita Raugaite; Mindaugas Stoksus; Monika Katenaite; Rimvydas Norvilas                                                                                                                                                                                                                                                                                                                                                                                                                                                                                                                                                                                                                                                                                                                                                                                                                                                                                                                                                                                                                                                                                                                                                                                                                                                                                                                                                                                                                                                     |
| EPI_ISL_1661661,<br>EPI_ISL_1661676,<br>EPI_ISL_1756767                                         | UAB Medicina Practica Laboratory                                                              | Vilnius University Hospital Santaros Klinikos, Center of Laboratory Medicine                   | Daniel Naumovas; Dovile Ezerskyte; Gytis Dudas; Ingrida Olendraite; Laimonas Griskevicius; Ligita Raugaite; Mindaugas Stoksus; Monika Katenaite; Rimvydas Norvilas                                                                                                                                                                                                                                                                                                                                                                                                                                                                                                                                                                                                                                                                                                                                                                                                                                                                                                                                                                                                                                                                                                                                                                                                                                                                                                                                                                                                                                                     |
| EPI_ISL_1960518,<br>EPI_ISL_1960578,<br>EPI_ISL_2615065                                         | UAB Medicina practica laboratorija                                                            | National Public Health Surveillance Laboratory                                                 | Ana Steponkiene; Danas Baksa; Jelena Razmuk; Lukas Vasionis; Lukas Zemaits; Migle Gabrielaite; Svajune Muralyte                                                                                                                                                                                                                                                                                                                                                                                                                                                                                                                                                                                                                                                                                                                                                                                                                                                                                                                                                                                                                                                                                                                                                                                                                                                                                                                                                                                                                                                                                                        |
| EPI_ISL_1966732                                                                                 | UBS RAIMUNDA CAVALCANTE DE SOUZA                                                              | Instituto Butantan                                                                             | Antonio Jorge Martins; Bianca Cechetto Carlos. Mendelics; Bibiana Santos; Claudia Renata dos Santos Barros; Cintia Bittar; David Schlesinger. Hemocentro Ribeirão Preto: Simone Kashima; Debora Botequiu Moretti; Elaine Cristina Marqueze; Elaine Vieira dos Santos; Elisângela Chicaroni Mattos; Erika Freitas; Evandra Strazza Rodrigues; Felipe Allan da Silva da Costa; Flavia Aburjalile; Fábio Sossai Possebon; Guilherme Campos; Guilherme Targino Valente; Heidge Fukumasa. USP-Botucatu: Rejane Maria Tommasini Grotto; Helena Lage Ferreira; Instituto Butantan: Dimas Tadeu Covas; Jardelina de Souza Todao Bernardino; Jayme A. Souza-Neto; Jessica Cristina Chagas Lesbon; Jorge A. Petrolini Marchesi; José Salvatore Leister Patané; João Paulo Kitajima; João Pessoa Araújo Jr.; Leila Sabrina Ullmann; Loyze Paola Oliveira de Lima; Luiz Aurelio de Campos Crispin. Centro de Genômica Funcional da ESALQ: Luiz Lehmann Coutinho; Luiz Carlos Junior de Alcantara; Lívia Sacchetto; Maise C. Pereira Parra; Maria Carolina Elias; Marta Giovanetti; Marília Moraes; Maurício Lacerda Nogueira. Prefeitura de Sao Paulo: Melissa Palmieri.; Patricia Akemi Assato; Paula Rahal; Paulo Inacio da Costa; Rafael dos Santos Bezerra; Raquel de Lello Rocha Campos Cassano. NGS Soluções Genômicas: Pilar Drummond Sampaio Corrêa Mariani. FZEA-USP Pirassununga: Mirele Daiana Poleti; Raul Machado Neto; Ricardo Augusto Brassaloti; Ricardo Haddad; Rodrigo Tocantins Calado. FAMERP-SJRP: Cecília Artico Banho; Sandra Coccuzzo Sampaio; Svetoslav Nanev Slavov; Vagner Fonseca; Vincent Louis Viala |
| EPI_ISL_3370429,<br>EPI_ISL_3370457                                                             | UC-Christus Clinical Hospital Laboratory                                                      | Laboratory of Molecular Virology, School of Medicine, Pontificia Universidad Catolica de Chile | Ana Maira Guzman; Andres E. Munoz-Marcos; Catalina Pardo-Roa; Eileen Serrano; Erick Salinas; Estefany Poblete; Francisco Melo; Jorge Levican; Leonardo I. Almonacid; Maria Jose Avendano; Maria Patricia Vega; Rafael A. Medina; Ricardo Enrique de la Barra; Tamara Garcia-Salum                                                                                                                                                                                                                                                                                                                                                                                                                                                                                                                                                                                                                                                                                                                                                                                                                                                                                                                                                                                                                                                                                                                                                                                                                                                                                                                                      |
| EPI_ISL_3236530,<br>EPI_ISL_3236550                                                             | UCC (Universidad Central del Caribe)                                                          | Grubaugh Lab - Yale School of Public Health                                                    | Anderson Brito; Andrea Firpo; Annie Watkins; Chaney Kalinich; Chantal Vogels; David Rivera Aponte; Ernesto Vazquez; Fabiola Cruz-Lopez; Fabiola Fontanet; Isabel Ott; Jessica Rothman; Joseph Fauver; Karolane Gonzalez; Kendall Billig; Mallery Breban; Mary Petrone; Natalie Machargo; Nathan Grubaugh; Patricia Serrano; Tania Mitwalli; Tara Alpert; Tobias Koch; Vianca Aponte                                                                                                                                                                                                                                                                                                                                                                                                                                                                                                                                                                                                                                                                                                                                                                                                                                                                                                                                                                                                                                                                                                                                                                                                                                    |
| EPI_ISL_414586,<br>EPI_ISL_414587,<br>EPI_ISL_418516,<br>EPI_ISL_418580                         | UCD National Virus Reference Laboratory                                                       | UCD National Virus Reference Laboratory                                                        | Alison Murphy; Brendan Loftus; Cillian F De Gascun; Gabriel Gonzalez; Jeff Connell; Jonathan Dean; Ken Wolfe; Kevin Byrne; Michael Carr; Suzie Coughlan                                                                                                                                                                                                                                                                                                                                                                                                                                                                                                                                                                                                                                                                                                                                                                                                                                                                                                                                                                                                                                                                                                                                                                                                                                                                                                                                                                                                                                                                |
| EPI_ISL_3276788                                                                                 | UCLA Clinical Micro Lab                                                                       | Los Angeles County Public Health Laboratories                                                  | P. Hemarajata et al.                                                                                                                                                                                                                                                                                                                                                                                                                                                                                                                                                                                                                                                                                                                                                                                                                                                                                                                                                                                                                                                                                                                                                                                                                                                                                                                                                                                                                                                                                                                                                                                                   |
| EPI_ISL_1405678,<br>EPI_ISL_1405889                                                             | UCSC Genomics Institute                                                                       | UCSC Genomics Institute                                                                        | A. Marm Kilpatrick; Angie Hinrichs; Beth Shapiro; Bryan Thornlow; David Haussler; Eric Beraut; Hugh Olsen; Ikenna Anigbogu; Isabel Bjork; Jakob McBroom; Jeremy Sanford; Joshua Kapp; Mark Akeson; Maximilian Haessler; Michael Stone; Miten Jain; Molly Cassatt-Johnstone; Namrita Dhillon; Russell Corbett-Detig; Terren Chang; Yatish Turakhia                                                                                                                                                                                                                                                                                                                                                                                                                                                                                                                                                                                                                                                                                                                                                                                                                                                                                                                                                                                                                                                                                                                                                                                                                                                                      |
| EPI_ISL_417935,<br>EPI_ISL_417938,<br>EPI_ISL_417939                                            | UCSF Clinical Microbiology Laboratory                                                         | Chan-Zuckerberg Biohub                                                                         | Amy Kistler; Angela Detweiler; Angela Pisco; Chaz Langelier; Chunyu Zhao; Gloria Dwyerman; G. Renuka Kumra; Patricia Castaneda; Jack Kamm; Josh Batson; Lucy Li; Lusaio Mwakibete; Maira Phelps; Michelle Tan; Norma Neff; Olga Botvinnik; Samantha Hao; Shaun Arealvo; Steve Miller                                                                                                                                                                                                                                                                                                                                                                                                                                                                                                                                                                                                                                                                                                                                                                                                                                                                                                                                                                                                                                                                                                                                                                                                                                                                                                                                   |
| EPI_ISL_3204299                                                                                 | ULS Castelo Branco                                                                            | Instituto Nacional de Saude (INSA)                                                             | Borges et al                                                                                                                                                                                                                                                                                                                                                                                                                                                                                                                                                                                                                                                                                                                                                                                                                                                                                                                                                                                                                                                                                                                                                                                                                                                                                                                                                                                                                                                                                                                                                                                                           |
| EPI_ISL_1117237                                                                                 | ULS Castelo Branco                                                                            | Instituto Nacional de Saude (INSA) and Instituto Gulbenkian de Ciencia (IGC)                   | Borges et al                                                                                                                                                                                                                                                                                                                                                                                                                                                                                                                                                                                                                                                                                                                                                                                                                                                                                                                                                                                                                                                                                                                                                                                                                                                                                                                                                                                                                                                                                                                                                                                                           |
| EPI_ISL_2132634,<br>EPI_ISL_3262142,<br>EPI_ISL_3262163,<br>EPI_ISL_3262166,<br>EPI_ISL_3262181 | UMC Groningen, Clinical Virology, Department of Medical Microbiology and Infection Prevention | UMC Groningen, Clinical Virology, Department of Medical Microbiology and Infection Prevention  | Alexander Friedrich; Coretta Van Leer-Buter; Erley Lizarazo-Forero; Hubert Niesters; Lilli Gard; Marjolein Knoester; Monika Fliss; Sigrid Rosema; Xuewei Zhou                                                                                                                                                                                                                                                                                                                                                                                                                                                                                                                                                                                                                                                                                                                                                                                                                                                                                                                                                                                                                                                                                                                                                                                                                                                                                                                                                                                                                                                          |
| EPI_ISL_1664786                                                                                 | UMMC-Health                                                                                   | WHO National Influenza Centre Russian Federation                                               | Andrey Komissarov; Anna Ivanova; Artem Fadeev; Daria Daniilenko; Dmitry Lioznov; Elena Nabieva; Georgii Bazynkin; Ksenia Safina; Kseniya Komissarova; Maria Pisareva; Maria Timofeeva; Mikhail Bakaev; Tamila Musaveva; Tatiana Platonova; Veronika Eder                                                                                                                                                                                                                                                                                                                                                                                                                                                                                                                                                                                                                                                                                                                                                                                                                                                                                                                                                                                                                                                                                                                                                                                                                                                                                                                                                               |
| EPI_ISL_1938120                                                                                 | UNC Charlotte COVID-19 Testing Lab                                                            | UNC Charlotte Environmental Monitoring Laboratory                                              | Angelica Martins; Cynthia Gibas; Jannatul Ferdous; Jessica Schlueter; Kevin Lambirth; Visva Barua                                                                                                                                                                                                                                                                                                                                                                                                                                                                                                                                                                                                                                                                                                                                                                                                                                                                                                                                                                                                                                                                                                                                                                                                                                                                                                                                                                                                                                                                                                                      |
| EPI_ISL_1966386                                                                                 | UNIDADE DE PRONTO ATENDIMENTO UPA DRA ANA OLIVIA BENTIVOGLIO                                  | Instituto Butantan / Mendelics                                                                 | Antonio Jorge Martins; Bianca Cechetto Carlos. Mendelics; Bibiana Santos; Claudia Renata dos Santos Barros; Cintia Bittar; David Schlesinger. Hemocentro Ribeirão Preto: Simone Kashima; Debora Botequiu Moretti; Elaine Cristina Marqueze; Elaine Vieira dos Santos; Elisângela Chicaroni Mattos; Erika Freitas; Evandra Strazza Rodrigues; Felipe Allan da Silva da Costa; Flavia Aburjalile; Fábio Sossai Possebon; Guilherme Campos; Guilherme Targino Valente; Heidge Fukumasa. USP-Botucatu: Rejane Maria Tommasini Grotto; Helena Lage Ferreira; Instituto Butantan: Dimas Tadeu Covas; Jardelina de Souza Todao Bernardino; Jayme A. Souza-Neto; Jessica Cristina Chagas Lesbon; Jorge A. Petrolini Marchesi; José Salvatore Leister Patané; João Paulo Kitajima; João Pessoa Araújo Jr.; Leila Sabrina Ullmann; Loyze Paola Oliveira de Lima; Luiz Aurelio de Campos Crispin. Centro de Genômica Funcional da ESALQ: Luiz Lehmann Coutinho; Luiz Carlos Junior de Alcantara; Lívia Sacchetto; Maise C. Pereira Parra; Maria Carolina Elias; Marta Giovanetti; Marília Moraes; Maurício Lacerda Nogueira. Prefeitura de Sao Paulo: Melissa Palmieri.; Patricia Akemi Assato; Paula Rahal; Paulo Inacio da Costa; Rafael dos Santos Bezerra; Raquel de Lello Rocha Campos Cassano. NGS Soluções Genômicas: Pilar Drummond Sampaio Corrêa Mariani. FZEA-USP Pirassununga: Mirele Daiana Poleti; Raul Machado Neto; Ricardo Augusto Brassaloti; Ricardo Haddad; Rodrigo Tocantins Calado. FAMERP-SJRP: Cecília Artico Banho; Sandra Coccuzzo Sampaio; Svetoslav Nanev Slavov; Vagner Fonseca; Vincent Louis Viala |
| EPI_ISL_1795230                                                                                 | UNIDADE DE SAUDE DA FAMILIA JOSE ADALBERTO LELLIS GARCIA                                      | Instituto Butantan / ESALQ- Piracicaba                                                         | Antonio Jorge Martins; Bianca Cechetto Carlos. Mendelics; Bibiana Santos; Claudia Renata dos Santos Barros; David Schlesinger. Hemocentro Ribeirão Preto: Simone Kashima; Debora Botequiu Moretti. Centro de Genômica Funcional da ESALQ: Luiz Lehmann Coutinho; Dimas Tadeu Covas; Elaine Cristina Marqueze; Elaine Vieira dos Santos; Elisângela Chicaroni Mattos; Erika Freitas; Evandra Strazza Rodrigues; Felipe Allan da Silva da Costa; Flavia Aburjalile; Guilherme Targino Valente; Heidge Fukumasa. USP-Botucatu: Rejane Maria Tommasini Grotto; Instituto Butantan: Alexander Roberto Precioso; Jayme A. Souza-Neto; Jessica Cristina Chagas Lesbon; José Salvatore Leister Patané; João Paulo Kitajima; Luiz Carlos Junior de Alcantara; Maria Carolina Elias; Marta Giovanetti; Patricia Akemi Assato; Rafael dos Santos Bezerra; Raquel de Lello Rocha Campos Cassano. NGS Soluções Genômicas: Pilar Drummond Sampaio Corrêa Mariani. FZEA-USP Pirassununga: Mirele Daiana Poleti; Raul Machado Neto; Ricardo Augusto Brassaloti; Ricardo Haddad; Rodrigo Tocantins Calado.; Sandra Coccuzzo Sampaio; Svetoslav Nanev Slavov; Vagner Fonseca; Vincent Louis Viala                                                                                                                                                                                                                                                                                                                                                                                                                                        |
| EPI_ISL_2136329                                                                                 | UNIGEM                                                                                        | Universidad Nacional de Colombia - Laboratorio Genómico One Health                             | Andres F. Cardona-Rios; Carlos Franco-Muñoz; Carolina Muñoz-Arango; Celeny Ortiz; Daniel O. Maldonado-Perez; Diego A. Álvarez-Díaz; Hector Alejandro Ruiz-Moreno; Idabely Betancur Ortiz; Jorge E. Osorio; Juan P. Hernandez-Ortiz; Karl A Ciudodis; Katherine Laiton-Donato; Laura Silvana Perez; Lina M. Hurtado; Marcela Mercado-Reyes; Maria Angélica Maya; Maria Stella López; Rita Almanza Payares; Sandra Ines Cano; Simón Villegas Velásquez                                                                                                                                                                                                                                                                                                                                                                                                                                                                                                                                                                                                                                                                                                                                                                                                                                                                                                                                                                                                                                                                                                                                                                   |
| EPI_ISL_3204751,<br>EPI_ISL_3204801,<br>EPI_ISL_3204821                                         | UNILABS                                                                                       | Instituto Nacional de Saude (INSA)                                                             | Borges et al                                                                                                                                                                                                                                                                                                                                                                                                                                                                                                                                                                                                                                                                                                                                                                                                                                                                                                                                                                                                                                                                                                                                                                                                                                                                                                                                                                                                                                                                                                                                                                                                           |
| EPI_ISL_1623282,<br>EPI_ISL_1623449                                                             | UNILIANS DECINES                                                                              | CNR Virus des Infections Respiratoires - France SUD                                            | Antonin Bal; Bruno Lina; Bruno Simon; Gregory Destras; Gwendolyne Burfin; Hadrien Regue; Laurence Josset; Martine Valette; Quentin Semanas                                                                                                                                                                                                                                                                                                                                                                                                                                                                                                                                                                                                                                                                                                                                                                                                                                                                                                                                                                                                                                                                                                                                                                                                                                                                                                                                                                                                                                                                             |
| EPI_ISL_5058551,<br>EPI_ISL_6452626                                                             | UNIT KESIHATAN AWAM HEBHK                                                                     | UKM Medical Molecular Biology Institute (UMBI)                                                 | Mira Farzana binti Mohamad Mokhtar                                                                                                                                                                                                                                                                                                                                                                                                                                                                                                                                                                                                                                                                                                                                                                                                                                                                                                                                                                                                                                                                                                                                                                                                                                                                                                                                                                                                                                                                                                                                                                                     |
| EPI_ISL_3980707                                                                                 | UNIT KESIHATAN DAN KESELAMATAN PEKERJA HOSPITAL SULTANAH BAHYIAH                              | Tropical Infectious Diseases Research & Education Centre (TIDREC), Universiti Malaya           | AsmaAnati CheMatSeri; Che-Norainon Yaacob; Jia-Yi Tan; Jo-Ern Wong; Kim-Kee Tan; Mulya-Mustika-Sari Zulkifli; Noor Syahida Azizan; Nur-Hidayana Mahfodz; Szalay AbuBakar; Siti-Sarah Nor'e                                                                                                                                                                                                                                                                                                                                                                                                                                                                                                                                                                                                                                                                                                                                                                                                                                                                                                                                                                                                                                                                                                                                                                                                                                                                                                                                                                                                                             |
| EPI_ISL_4463186                                                                                 | UNIT KPAS, PKD MELAKA TENGAH                                                                  | UKM Medical Molecular Biology Institute (UMBI)                                                 | Nur Alyaa Afifah Md Shahri                                                                                                                                                                                                                                                                                                                                                                                                                                                                                                                                                                                                                                                                                                                                                                                                                                                                                                                                                                                                                                                                                                                                                                                                                                                                                                                                                                                                                                                                                                                                                                                             |
| EPI_ISL_5159358                                                                                 | UNIT KPAS, PKDMT                                                                              | UKM Medical Molecular Biology Institute (UMBI)                                                 | Mira Farzana binti Mohamad Mokhtar                                                                                                                                                                                                                                                                                                                                                                                                                                                                                                                                                                                                                                                                                                                                                                                                                                                                                                                                                                                                                                                                                                                                                                                                                                                                                                                                                                                                                                                                                                                                                                                     |
| EPI_ISL_4565018                                                                                 | UNIT OSH, HOSPITAL SUNGAI BULOH                                                               | Tropical Infectious Diseases Research & Education Centre (TIDREC), Universiti Malaya           | AsmaAnati CheMatSeri; Che-Norainon Yaacob; Jia-Yi Tan; Jo-Ern Wong; Kim-Kee Tan; Mulya-Mustika-Sari Zulkifli; Noor Syahida Azizan; Nur-Hidayana Mahfodz; Szalay AbuBakar; Siti-Sarah Nor'e                                                                                                                                                                                                                                                                                                                                                                                                                                                                                                                                                                                                                                                                                                                                                                                                                                                                                                                                                                                                                                                                                                                                                                                                                                                                                                                                                                                                                             |
| EPI_ISL_1171683                                                                                 | UOC LAB ANALISI PO CARDARELLI CAMPOBASSO                                                      | Istituto Zooprofilattico Sperimentale dell'Abruzzo e Molise "G. Caporale"                      | Ancora M; Calistri P; Cammà C; Curini V; Di Domenico M; Di Pasquale A; Felice V. Lorusso A; Mangone I; Marcacci M; Niro G; Puglia I; Rinaldi A; Savini G; Scialabba S; Scutellà M                                                                                                                                                                                                                                                                                                                                                                                                                                                                                                                                                                                                                                                                                                                                                                                                                                                                                                                                                                                                                                                                                                                                                                                                                                                                                                                                                                                                                                      |
| EPI_ISL_1358322                                                                                 | UPA Vila Santa Catarina                                                                       | Instituto Adolfo Lutz, Interdisciplinary Procedures Center, Strategic Laboratory               | Caio Vinicius Dias Lopes; Claudia Regina Gonçalves; Claudio Tavares Sacchi; Erica Valeessa Ramos Gomes; Karoline Rodrigues Campos                                                                                                                                                                                                                                                                                                                                                                                                                                                                                                                                                                                                                                                                                                                                                                                                                                                                                                                                                                                                                                                                                                                                                                                                                                                                                                                                                                                                                                                                                      |
| EPI_ISL_1482625,<br>EPI_ISL_1624473                                                             | URMC LABS                                                                                     | Wadsworth Center, New York State Department of Health                                          | Alexis Russell; Catharine Prussing; Daryl M. Lamson; Erasmus Schneider; Erica Lasek-Nesselquist; John Kelly; Jonathan Plitnick; Kirsten St. George; Matthew Shudt; Melissa A Leisner; Navjot Singh                                                                                                                                                                                                                                                                                                                                                                                                                                                                                                                                                                                                                                                                                                                                                                                                                                                                                                                                                                                                                                                                                                                                                                                                                                                                                                                                                                                                                     |
| EPI_ISL_1711148,<br>EPI_ISL_1711179,<br>EPI_ISL_1711206                                         | US Air Force School of Aerospace Medicine                                                     | US Air Force School of Aerospace Medicine                                                      | Amanda Javorina; Anthony Fries; Clarise Starr; Elizabeth Macias; Jennifer Meyer; Sarah Purves; William Buggele; William Gruner                                                                                                                                                                                                                                                                                                                                                                                                                                                                                                                                                                                                                                                                                                                                                                                                                                                                                                                                                                                                                                                                                                                                                                                                                                                                                                                                                                                                                                                                                         |
| EPI_ISL_2131372                                                                                 | USCA Avezzano                                                                                 | Istituto Zooprofilattico                                                                       | Ancora M; Calistri P; Cammà C; Caporale M; Curini V; Delli Compagni E; Di Domenico M; Di Lollo Valeria; Di Pasquale A; Lorusso A; Mangone I; Marcacci M; Puglia I; Rinaldi A; Savini G; Scialabba S                                                                                                                                                                                                                                                                                                                                                                                                                                                                                                                                                                                                                                                                                                                                                                                                                                                                                                                                                                                                                                                                                                                                                                                                                                                                                                                                                                                                                    |

|                                                                                                                                                                                                                                                                                                                                                                                                                                                                                                                                                                                                                                                                                                                                                                                                                                                                                                                                                                                                                                                                                                                                                                                                                                                                                                                                                                                                                                                                                                                                                                                                                                                                                                                                                                                                                                                                                                                                                                                                                                                                                                                                                                                                                                                                                                                                                                                                                                                                                                                                                                                                                                                                                                                                                                                                                                                                                                                                                                                                                                                                                                                                                                                                                                                                                                                                                                                                                                                                                                                                                                                                                                                                                                                                                                                                                                                                                                                                                                                                                                                                       |                                                                                         |                                                                                                                                                |                                                                                                                                                                                                                                                                                                                                                                                                                                                                                                                                                                                                                                                                                                                                                                                                                                                                                                                                                                                                                                                                                                                                                                                                                                                                                                                                                                                                                                                                                                                                                                                                                                                                                                                                                                                                                                                                              |                                                                                                                                                                                                                                                                                                                                  |
|-----------------------------------------------------------------------------------------------------------------------------------------------------------------------------------------------------------------------------------------------------------------------------------------------------------------------------------------------------------------------------------------------------------------------------------------------------------------------------------------------------------------------------------------------------------------------------------------------------------------------------------------------------------------------------------------------------------------------------------------------------------------------------------------------------------------------------------------------------------------------------------------------------------------------------------------------------------------------------------------------------------------------------------------------------------------------------------------------------------------------------------------------------------------------------------------------------------------------------------------------------------------------------------------------------------------------------------------------------------------------------------------------------------------------------------------------------------------------------------------------------------------------------------------------------------------------------------------------------------------------------------------------------------------------------------------------------------------------------------------------------------------------------------------------------------------------------------------------------------------------------------------------------------------------------------------------------------------------------------------------------------------------------------------------------------------------------------------------------------------------------------------------------------------------------------------------------------------------------------------------------------------------------------------------------------------------------------------------------------------------------------------------------------------------------------------------------------------------------------------------------------------------------------------------------------------------------------------------------------------------------------------------------------------------------------------------------------------------------------------------------------------------------------------------------------------------------------------------------------------------------------------------------------------------------------------------------------------------------------------------------------------------------------------------------------------------------------------------------------------------------------------------------------------------------------------------------------------------------------------------------------------------------------------------------------------------------------------------------------------------------------------------------------------------------------------------------------------------------------------------------------------------------------------------------------------------------------------------------------------------------------------------------------------------------------------------------------------------------------------------------------------------------------------------------------------------------------------------------------------------------------------------------------------------------------------------------------------------------------------------------------------------------------------------------------------------|-----------------------------------------------------------------------------------------|------------------------------------------------------------------------------------------------------------------------------------------------|------------------------------------------------------------------------------------------------------------------------------------------------------------------------------------------------------------------------------------------------------------------------------------------------------------------------------------------------------------------------------------------------------------------------------------------------------------------------------------------------------------------------------------------------------------------------------------------------------------------------------------------------------------------------------------------------------------------------------------------------------------------------------------------------------------------------------------------------------------------------------------------------------------------------------------------------------------------------------------------------------------------------------------------------------------------------------------------------------------------------------------------------------------------------------------------------------------------------------------------------------------------------------------------------------------------------------------------------------------------------------------------------------------------------------------------------------------------------------------------------------------------------------------------------------------------------------------------------------------------------------------------------------------------------------------------------------------------------------------------------------------------------------------------------------------------------------------------------------------------------------|----------------------------------------------------------------------------------------------------------------------------------------------------------------------------------------------------------------------------------------------------------------------------------------------------------------------------------|
| EPI_ISL_1524851                                                                                                                                                                                                                                                                                                                                                                                                                                                                                                                                                                                                                                                                                                                                                                                                                                                                                                                                                                                                                                                                                                                                                                                                                                                                                                                                                                                                                                                                                                                                                                                                                                                                                                                                                                                                                                                                                                                                                                                                                                                                                                                                                                                                                                                                                                                                                                                                                                                                                                                                                                                                                                                                                                                                                                                                                                                                                                                                                                                                                                                                                                                                                                                                                                                                                                                                                                                                                                                                                                                                                                                                                                                                                                                                                                                                                                                                                                                                                                                                                                                       | USCA Avezzano AVEZZANO(L'AQUILA)                                                        | Sperimentale dell'Abruzzo e Molise "G. Caporale"                                                                                               | Ancora M; Calistri P; Cammà C; Caporale M; Curini V; Delli Compagni E; Di Domenico M; Di Lollo Valeria; Di Pasquale A; Lorusso A; Mangone I; Marccaci M; Puglia I; Rinaldi A; Savini G; Scialabba S                                                                                                                                                                                                                                                                                                                                                                                                                                                                                                                                                                                                                                                                                                                                                                                                                                                                                                                                                                                                                                                                                                                                                                                                                                                                                                                                                                                                                                                                                                                                                                                                                                                                          |                                                                                                                                                                                                                                                                                                                                  |
| EPI_ISL_1707554                                                                                                                                                                                                                                                                                                                                                                                                                                                                                                                                                                                                                                                                                                                                                                                                                                                                                                                                                                                                                                                                                                                                                                                                                                                                                                                                                                                                                                                                                                                                                                                                                                                                                                                                                                                                                                                                                                                                                                                                                                                                                                                                                                                                                                                                                                                                                                                                                                                                                                                                                                                                                                                                                                                                                                                                                                                                                                                                                                                                                                                                                                                                                                                                                                                                                                                                                                                                                                                                                                                                                                                                                                                                                                                                                                                                                                                                                                                                                                                                                                                       | USCA Sulmona                                                                            | Istituto Zooprofilattico Sperimentale dell'Abruzzo e Molise "G. Caporale"                                                                      | Ancora M; Calistri P; Cammà C; Caporale M; Curini V; Delli Compagni E; Di Domenico M; Di Lollo Valeria; Di Pasquale A; Lorusso A; Mangone I; Marccaci M; Puglia I; Rinaldi A; Savini G; Scialabba S                                                                                                                                                                                                                                                                                                                                                                                                                                                                                                                                                                                                                                                                                                                                                                                                                                                                                                                                                                                                                                                                                                                                                                                                                                                                                                                                                                                                                                                                                                                                                                                                                                                                          |                                                                                                                                                                                                                                                                                                                                  |
| EPI_ISL_413562, EPI_ISL_413563, EPI_ISL_413601, EPI_ISL_413649, EPI_ISL_413651, EPI_ISL_413652, EPI_ISL_413652, EPI_ISL_413663, EPI_ISL_413667, EPI_ISL_414617, EPI_ISL_414617, EPI_ISL_414618, EPI_ISL_414619, EPI_ISL_414620, EPI_ISL_415592, EPI_ISL_415594, EPI_ISL_415595, EPI_ISL_415596, EPI_ISL_415599, EPI_ISL_415602, EPI_ISL_415603, EPI_ISL_415606, EPI_ISL_415608, EPI_ISL_415609, EPI_ISL_415610, EPI_ISL_415611, EPI_ISL_415612, EPI_ISL_415614, EPI_ISL_415616, EPI_ISL_415617, EPI_ISL_415620, EPI_ISL_415621, EPI_ISL_415626, EPI_ISL_415627, EPI_ISL_416435, EPI_ISL_416436, EPI_ISL_416439, EPI_ISL_416441, EPI_ISL_416442, EPI_ISL_416444, EPI_ISL_416448, EPI_ISL_416449, EPI_ISL_416450, EPI_ISL_416451, EPI_ISL_416452, EPI_ISL_416453, EPI_ISL_416454, EPI_ISL_416456, EPI_ISL_416635, EPI_ISL_416642, EPI_ISL_416644, EPI_ISL_416646, EPI_ISL_416647, EPI_ISL_416650, EPI_ISL_416652, EPI_ISL_416653, EPI_ISL_416654, EPI_ISL_416655, EPI_ISL_416657, EPI_ISL_416661, EPI_ISL_416664, EPI_ISL_416665, EPI_ISL_416668, EPI_ISL_416669, EPI_ISL_416670, EPI_ISL_416671, EPI_ISL_416672, EPI_ISL_416673, EPI_ISL_416674, EPI_ISL_416675, EPI_ISL_416676, EPI_ISL_416677, EPI_ISL_416678, EPI_ISL_416681, EPI_ISL_416682, EPI_ISL_416684, EPI_ISL_416686, EPI_ISL_416689, EPI_ISL_416692, EPI_ISL_416701, EPI_ISL_416702, EPI_ISL_416712, EPI_ISL_416713, EPI_ISL_416714, EPI_ISL_416718, EPI_ISL_416719, EPI_ISL_416722, EPI_ISL_416725, EPI_ISL_416726, EPI_ISL_416727, EPI_ISL_417343, EPI_ISL_417345, EPI_ISL_417346, EPI_ISL_417347, EPI_ISL_417349, EPI_ISL_417350, EPI_ISL_417351, EPI_ISL_417361, EPI_ISL_417365, EPI_ISL_417366, EPI_ISL_417367, EPI_ISL_417368, EPI_ISL_417369, EPI_ISL_417370, EPI_ISL_417374, EPI_ISL_417375, EPI_ISL_417376, EPI_ISL_417449, EPI_ISL_417450, EPI_ISL_417451, EPI_ISL_417455, EPI_ISL_417456, EPI_ISL_418027, EPI_ISL_418028, EPI_ISL_418033, EPI_ISL_418040, EPI_ISL_418041, EPI_ISL_418042, EPI_ISL_418043, EPI_ISL_418045, EPI_ISL_418045, EPI_ISL_418050, EPI_ISL_418051, EPI_ISL_418054, EPI_ISL_418055, EPI_ISL_418060, EPI_ISL_418061, EPI_ISL_418062, EPI_ISL_418067, EPI_ISL_418071, EPI_ISL_418071, EPI_ISL_418075, EPI_ISL_418079, EPI_ISL_418080, EPI_ISL_418867, EPI_ISL_418868, EPI_ISL_418870, EPI_ISL_418871, EPI_ISL_418872, EPI_ISL_418875, EPI_ISL_418875, EPI_ISL_418877, EPI_ISL_418878, EPI_ISL_418884, EPI_ISL_418884, EPI_ISL_418886, EPI_ISL_418887, EPI_ISL_418890, EPI_ISL_418891, EPI_ISL_418891, EPI_ISL_418892, EPI_ISL_418893, EPI_ISL_418895, EPI_ISL_418895, EPI_ISL_418899, EPI_ISL_418901, EPI_ISL_418905, EPI_ISL_418906, EPI_ISL_418907, EPI_ISL_418908, EPI_ISL_418909, EPI_ISL_418911, EPI_ISL_418916, EPI_ISL_418917, EPI_ISL_418918, EPI_ISL_418921, EPI_ISL_418922, EPI_ISL_418922, EPI_ISL_418923, EPI_ISL_418923, EPI_ISL_418926, EPI_ISL_418927, EPI_ISL_418928, EPI_ISL_418928, EPI_ISL_418932, EPI_ISL_418936, EPI_ISL_418938, EPI_ISL_418939, EPI_ISL_418940, EPI_ISL_418943, EPI_ISL_418944, EPI_ISL_418944, EPI_ISL_418949, EPI_ISL_418950, EPI_ISL_418952, EPI_ISL_418953, EPI_ISL_418959, EPI_ISL_418960, EPI_ISL_1110098, EPI_ISL_1201161, EPI_ISL_1341186, EPI_ISL_1341647, EPI_ISL_1341706, EPI_ISL_1346525, EPI_ISL_1346565, EPI_ISL_14909891, EPI_ISL_14980805, EPI_ISL_1523992, EPI_ISL_1526949, EPI_ISL_1601310, EPI_ISL_1616769, EPI_ISL_1620853, EPI_ISL_1621049, EPI_ISL_1621068, EPI_ISL_1628117, EPI_ISL_1670721, EPI_ISL_1680240, EPI_ISL_1715734, EPI_ISL_1785831, EPI_ISL_1805515, EPI_ISL_1826116, EPI_ISL_1826167, EPI_ISL_1826179, EPI_ISL_1850226, EPI_ISL_2002270, EPI_ISL_2002367, EPI_ISL_2002439, EPI_ISL_2002534, EPI_ISL_2002917, EPI_ISL_2020970, EPI_ISL_2031345, EPI_ISL_2037455, EPI_ISL_2037663, EPI_ISL_2086387, EPI_ISL_2104841, EPI_ISL_2790439, EPI_ISL_2790460, EPI_ISL_2790604, EPI_ISL_2790605, EPI_ISL_3236646, EPI_ISL_3236673, EPI_ISL_3236692, EPI_ISL_3236820, EPI_ISL_3236853, EPI_ISL_3236870, EPI_ISL_3244869, EPI_ISL_3245052, EPI_ISL_3244881, EPI_ISL_3244889, EPI_ISL_3245071, EPI_ISL_3245080 | see above                                                                               | UW Virology Lab                                                                                                                                | UW Virology Lab                                                                                                                                                                                                                                                                                                                                                                                                                                                                                                                                                                                                                                                                                                                                                                                                                                                                                                                                                                                                                                                                                                                                                                                                                                                                                                                                                                                                                                                                                                                                                                                                                                                                                                                                                                                                                                                              | Alexander Greninger; Hong Xie; Keith Jerome; Keith R Jerome; Lasata Shrestha; Margaret Mills; Maria Lukes; Mei-Li Huang; Michelle Lin; Nathan Breit; Noah Baker; Noah R. Baker; Patrick Mathias; Pavitra Roychoudhury; Ricardo Perez; Robert J. Livingston; Saraswati Kulkarni; Sean Ellis; Shah Mohamed Bakhash; Tien V. Nguyen |
| EPI_ISL_4585381                                                                                                                                                                                                                                                                                                                                                                                                                                                                                                                                                                                                                                                                                                                                                                                                                                                                                                                                                                                                                                                                                                                                                                                                                                                                                                                                                                                                                                                                                                                                                                                                                                                                                                                                                                                                                                                                                                                                                                                                                                                                                                                                                                                                                                                                                                                                                                                                                                                                                                                                                                                                                                                                                                                                                                                                                                                                                                                                                                                                                                                                                                                                                                                                                                                                                                                                                                                                                                                                                                                                                                                                                                                                                                                                                                                                                                                                                                                                                                                                                                                       | Uherskohradišská nemocnice, a.s.                                                        | Institute of Molecular and Translational Medicine / Laboratory of Experimental Medicine, Faculty of Medicine and Dentistry, Palacky University | Barbora Blumová; Hana Jarešková; Marián Hajdúch; Rastislav Slavkovský; Vladimíra Koudeláková                                                                                                                                                                                                                                                                                                                                                                                                                                                                                                                                                                                                                                                                                                                                                                                                                                                                                                                                                                                                                                                                                                                                                                                                                                                                                                                                                                                                                                                                                                                                                                                                                                                                                                                                                                                 |                                                                                                                                                                                                                                                                                                                                  |
| EPI_ISL_2942479, EPI_ISL_6775460                                                                                                                                                                                                                                                                                                                                                                                                                                                                                                                                                                                                                                                                                                                                                                                                                                                                                                                                                                                                                                                                                                                                                                                                                                                                                                                                                                                                                                                                                                                                                                                                                                                                                                                                                                                                                                                                                                                                                                                                                                                                                                                                                                                                                                                                                                                                                                                                                                                                                                                                                                                                                                                                                                                                                                                                                                                                                                                                                                                                                                                                                                                                                                                                                                                                                                                                                                                                                                                                                                                                                                                                                                                                                                                                                                                                                                                                                                                                                                                                                                      | Unidad de Investigación Biomedica de Zacatecas (UIBZ)                                   | Unidad de Genomica Avanzada                                                                                                                    | : Alejandra Garcia-Gasca; Alejandra Hernández-Teran; Alejandro Sanchez-Flores; Alfredo Herrera-Estrella; Alicia Ocaña-Mondragón; Andreu Comas-García; Angel Gustavo Salas-Lais; Antonio Loza Roman; Bernardo Martínez-Miguel; Blanca Taboada; Brenda Irasema Maldonado-Meza; Bruno Gomez-Gil; Carla Ivon Herrera-Najera; Carlos F. Arias; Celia Boukadida; Celida Duque Molina; Celida Martínez- Rodríguez; Clara Esperanza Santacruz-Tinoco; Concepcion Grajales-Muñiz; Consorcio Mexicano de Vigilancia Genómica (CoViGen-Mex). Authors (in alphabetical order): Julio Elias Alvarado-Yaah; Cristóbal Cháidez-Quiróz; Daniel Fregoso-Rueda; Daniel Lira Morales; Eduardo Becerri-Vargas; Fernando Fontove-Herrera; Fidencio Mejía-Nepomuceno; Francisco Pulido; Gloria Elena Espinosa-Ayala; Gloria María Molina-Salinas; Gloria Vazquez; Hector Esteban Paz-Juárez; Hector Montoya-Fuentes; Helen Haydee Fernanda Ramirez-Plascencia; Irvin González-López; Jean Pierre González; José Armando Vázquez-Pérez; Jorge Salas-Hernández; José Antonio Enciso-Moreno; José Arturo Martínez-Orozco; José Esteban Muñoz-Medina; José de Jesús Nuñez-Contreras; Juan Bautista Chale-Dzul; Julissa Enciso-Ibarra; Luis Alberto Ochoa-Carrera; Margarita Matías-Florentino; María Guadalupe Santiago-Mauricio; María Guadalupe de Jesús Mireles-Rivera; Mario Mujica-Sánchez; Marissa Perez-García; Nelly Sélem-Mojica; Pavel Isa; Ricardo Ciriá Merce; Ricardo Grande; Rosa María Gutiérrez Ríos; Santiago Avila-Ríos; Selene Zárate; Susana Lopez; Verónica Mata-Haro; Victor Eduardo Garcia-Arias; Victor Hugo Borja-Aburto                                                                                                                                                                                                                                                      |                                                                                                                                                                                                                                                                                                                                  |
| EPI_ISL_2942351, EPI_ISL_2942671, EPI_ISL_2942681, EPI_ISL_3805662, EPI_ISL_6775346, EPI_ISL_6775381                                                                                                                                                                                                                                                                                                                                                                                                                                                                                                                                                                                                                                                                                                                                                                                                                                                                                                                                                                                                                                                                                                                                                                                                                                                                                                                                                                                                                                                                                                                                                                                                                                                                                                                                                                                                                                                                                                                                                                                                                                                                                                                                                                                                                                                                                                                                                                                                                                                                                                                                                                                                                                                                                                                                                                                                                                                                                                                                                                                                                                                                                                                                                                                                                                                                                                                                                                                                                                                                                                                                                                                                                                                                                                                                                                                                                                                                                                                                                                  | Unidad de Investigación Medica de Yucatán (UIMY)                                        | Unidad de Genomica Avanzada                                                                                                                    | : Alejandra Garcia-Gasca; Alejandra Hernández-Teran; Alejandro Sanchez-Flores; Alfredo Herrera-Estrella; Alicia Ocaña-Mondragón; Andreu Comas-García; Angel Gustavo Salas-Lais; Antonio Loza Roman; Bernardo Martínez-Miguel; Blanca Taboada; Brenda Irasema Maldonado-Meza; Bruno Gomez-Gil; Carla Ivon Herrera-Najera; Carlos F. Arias; Celia Boukadida; Celida Duque Molina; Celida Martínez- Rodríguez; Clara Esperanza Santacruz-Tinoco; Concepcion Grajales-Muñiz; Consorcio Mexicano de Vigilancia Genómica (CoViGen-Mex). Authors (in alphabetical order): Julio Elias Alvarado-Yaah; Cristóbal Cháidez-Quiróz; Daniel Fregoso-Rueda; Daniel Lira Morales; Eduardo Becerri-Vargas; Fernando Fontove-Herrera; Fidencio Mejía-Nepomuceno; Francisco Pulido; Gloria Elena Espinosa-Ayala; Gloria María Molina-Salinas; Gloria Vazquez; Hector Esteban Paz-Juárez; Hector Montoya-Fuentes; Helen Haydee Fernanda Ramirez-Plascencia; Irvin González-López; Jean Pierre González; José Armando Vázquez-Pérez; Jorge Salas-Hernández; José Antonio Enciso-Moreno; José Arturo Martínez-Orozco; José Esteban Muñoz-Medina; José de Jesús Nuñez-Contreras; Juan Bautista Chale-Dzul; Julissa Enciso-Ibarra; Luis Alberto Ochoa-Carrera; Margarita Matías-Florentino; María Guadalupe Santiago-Mauricio; María Guadalupe de Jesús Mireles-Rivera; Mario Mujica-Sánchez; Marissa Perez-García; Nelly Sélem-Mojica; Pavel Isa; Ricardo Ciriá Merce; Ricardo Grande; Rosa María Gutiérrez Ríos; Santiago Avila-Ríos; Selene Zárate; Susana Lopez; Verónica Mata-Haro; Victor Eduardo Garcia-Arias; Victor Hugo Borja-Aburto                                                                                                                                                                                                                                                      |                                                                                                                                                                                                                                                                                                                                  |
| EPI_ISL_2490524, EPI_ISL_2490525, EPI_ISL_6227474                                                                                                                                                                                                                                                                                                                                                                                                                                                                                                                                                                                                                                                                                                                                                                                                                                                                                                                                                                                                                                                                                                                                                                                                                                                                                                                                                                                                                                                                                                                                                                                                                                                                                                                                                                                                                                                                                                                                                                                                                                                                                                                                                                                                                                                                                                                                                                                                                                                                                                                                                                                                                                                                                                                                                                                                                                                                                                                                                                                                                                                                                                                                                                                                                                                                                                                                                                                                                                                                                                                                                                                                                                                                                                                                                                                                                                                                                                                                                                                                                     | Centro de Investigación Biológica de Zacatecas (UIBZ)                                   | Centro de Investigación en Enfermedades Infecciosas (CIEN), Instituto Nacional de Enfermedades Respiratorias (INER)                            | : Alejandra Garcia-Gasca; Alejandra Garcia-Gasca; Alejandra Hernández-Teran; Alejandro Sanchez-Flores; Alejandro Sánchez-Flores; Alfredo Herrera-Estrella; Alicia Ocaña-Mondragón; Andreu Comas-García; Angel Gustavo Salas-Lais; Antonio Loza Román; Bernardo Martínez-Miguel; Blanca Taboada; Brenda Irasema Maldonado-Meza; Bruno Gomez-Gil; Bruno Gomez-Gil; Carla Ivon Herrera-Najera; Carlos F. Arias; Celia Boukadida; Clara Esperanza Santacruz-Tinoco; Concepcion Grajales-Muñiz; Consorcio Mexicano de Vigilancia Genómica (CoViGen-Mex). Authors (in alphabetical order): Julio Elias Alvarado-Yaah; Cristóbal Cháidez-Quiróz; Célida Duque Molina; Celida Martínez- Rodríguez; Daniel Fregoso-Rueda; Daniel Lira Morales; Eduardo Becerri-Vargas; Eduardo Rivera-Martínez; Fernando Fontove-Herrera; Fidencio Mejía-Nepomuceno; Francisco Pulido; Gabriel Chavira-Trujillo; Gloria Elena Espinosa-Ayala; Gloria María Molina-Salinas; Gloria Vazquez; Hector Esteban Paz-Juárez; Hector Montoya-Fuentes; Helen Haydee Fernanda Ramirez-Plascencia; Irvin González-López; Jean Pierre González; Jesús Hernández; Joel Armando Vázquez-Pérez; Jorge Salas-Hernández; José Antonio Enciso-Moreno; José Arturo Martínez-Orozco; José Esteban Muñoz-Medina; José de Jesús Nuñez-Contreras; Juan Bautista Chale-Dzul; Julissa Enciso-Ibarra; Kathia Elizabeth Tapia-Díaz; Luis Alberto Ochoa-Carrera; Margarita Matías-Florentino; Mario Mujica-Sánchez; Marissa Perez-García; María Eugenia Jiménez-Corona; María Guadalupe Santiago-Mauricio; María Guadalupe de Jesús Mireles-Rivera; Nelly Sélem-Mojica; Pavel Isa; Ricardo Ciriá Merce; Ricardo Grande; Rosa María Gutiérrez Ríos; Rosa María Gutiérrez Ríos; Rosario Vazquez-Larios; Santiago Avila-Ríos; Selene Zárate; Susana Lopez; Verónica Mata-Haro; Victor Eduardo Garcia-Arias; Victor Hugo Borja-Aburto |                                                                                                                                                                                                                                                                                                                                  |
| EPI_ISL_1279363, EPI_ISL_1287766                                                                                                                                                                                                                                                                                                                                                                                                                                                                                                                                                                                                                                                                                                                                                                                                                                                                                                                                                                                                                                                                                                                                                                                                                                                                                                                                                                                                                                                                                                                                                                                                                                                                                                                                                                                                                                                                                                                                                                                                                                                                                                                                                                                                                                                                                                                                                                                                                                                                                                                                                                                                                                                                                                                                                                                                                                                                                                                                                                                                                                                                                                                                                                                                                                                                                                                                                                                                                                                                                                                                                                                                                                                                                                                                                                                                                                                                                                                                                                                                                                      | Unidad de Investigación Biológica de Zacatecas (UIBZ)                                   | Instituto Nacional de Enfermedades Respiratorias (INER); Centro de Investigación en Enfermedades Infecciosas (CIEN)                            | : Alejandra Garcia-Gasca; Alicia Ocaña-Mondragón; Angel Gustavo Salas-Lais; Bernardo Martínez-Miguel; Blanca Taboada; Brenda Irasema Maldonado-Meza; Carla Ivon Herrera-Najera; Carlos F. Arias; Celia Boukadida; Clara Esperanza Santacruz-Tinoco; Concepcion Grajales-Muñiz; Consorcio Mexicano de Vigilancia Genómica (CoViGen-Mex). Authors (in alphabetical order): Julio Elias Alvarado-Yaah; Fernando Fontove-Herrera; Francisco Pulido; Gloria Elena Espinosa-Ayala; Gloria María Molina-Salinas; Gloria Vazquez; Hector Esteban Paz-Juárez; Hector Montoya-Fuentes; Helen Haydee Fernanda Ramirez-Plascencia; Jorge Ivan Salinal-Navarez; José Antonio Enciso-Moreno; José Esteban Muñoz-Medina; José de Jesús Nuñez-Contreras; Juan Bautista Chale-Dzul; Luis Alberto Ochoa-Carrera; Margarita Matías-Florentino; María Guadalupe Santiago-Mauricio; María Guadalupe de Jesús Mireles-Rivera; Nelly Sélem-Mojica; Pavel Isa; Ricardo Ciriá Merce; Ricardo Grande; Santiago Avila-Ríos; Victor Hugo Borja-Aburto                                                                                                                                                                                                                                                                                                                                                                                                                                                                                                                                                                                                                                                                                                                                                                                                                                                    |                                                                                                                                                                                                                                                                                                                                  |
| EPI_ISL_2681119                                                                                                                                                                                                                                                                                                                                                                                                                                                                                                                                                                                                                                                                                                                                                                                                                                                                                                                                                                                                                                                                                                                                                                                                                                                                                                                                                                                                                                                                                                                                                                                                                                                                                                                                                                                                                                                                                                                                                                                                                                                                                                                                                                                                                                                                                                                                                                                                                                                                                                                                                                                                                                                                                                                                                                                                                                                                                                                                                                                                                                                                                                                                                                                                                                                                                                                                                                                                                                                                                                                                                                                                                                                                                                                                                                                                                                                                                                                                                                                                                                                       | Unidad de Investigación Biológica de Zacatecas (UIBZ)                                   | Instituto de Biotecnología de la UNAM                                                                                                          | : Alejandra Garcia-Gasca; Alejandra Hernández-Teran; Alejandro Sánchez-Flores; Alfredo Herrera-Estrella; Alicia Ocaña-Mondragón; Andreu Comas-García; Angel Gustavo Salas-Lais; Antonio Loza Román; Bernardo Martínez-Miguel; Blanca Taboada; Brenda Irasema Maldonado-Meza; Bruno Gomez-Gil; Carla Ivon Herrera-Najera; Carlos F. Arias; Celia Boukadida; Clara Esperanza Santacruz-Tinoco; Concepcion Grajales-Muñiz; Consorcio Mexicano de Vigilancia Genómica (CoViGen-Mex). Authors (in alphabetical order): Julio Elias Alvarado-Yaah; Cristóbal Cháidez-Quiróz; Célida Duque Molina; Celida Martínez- Rodríguez; Daniel Fregoso-Rueda; Daniel Lira Morales; Eduardo Becerri-Vargas; Fernando Fontove-Herrera; Fidencio Mejía-Nepomuceno; Francisco Pulido; Gabriel Chavira-Trujillo; Gloria Elena Espinosa-Ayala; Gloria María Molina-Salinas; Gloria Vazquez; Hector Esteban Paz-Juárez; Hector Montoya-Fuentes; Helen Haydee Fernanda Ramirez-Plascencia; Irvin González-López; Jean Pierre González; Jesús Hernández; Joel Armando Vázquez-Pérez; Jorge Salas-Hernández; José Antonio Enciso-Moreno; José Arturo Martínez-Orozco; José Esteban Muñoz-Medina; José de Jesús Nuñez-Contreras; Juan Bautista Chale-Dzul; Julissa Enciso-Ibarra; Kathia Elizabeth Tapia-Díaz; Luis Alberto Ochoa-Carrera; Margarita Matías-Florentino; Mario Mujica-Sánchez; Marissa Perez-García; María Eugenia Jiménez-Corona; María Guadalupe Santiago-Mauricio; María Guadalupe de Jesús Mireles-Rivera; Nelly Sélem-Mojica; Pavel Isa; Ricardo Ciriá Merce; Ricardo Grande; Rosa María Gutiérrez Ríos; Rosa María Gutiérrez Ríos; Rosario Vazquez-Larios; Santiago Avila-Ríos; Selene Zárate; Susana Lopez; Verónica Mata-Haro; Victor Eduardo Garcia-Arias; Victor Hugo Borja-Aburto                                                                                             |                                                                                                                                                                                                                                                                                                                                  |
| EPI_ISL_2091231, EPI_ISL_2490357, EPI_ISL_2490470, EPI_ISL_3556978, EPI_ISL_5194039, EPI_ISL_6227362, EPI_ISL_6227363                                                                                                                                                                                                                                                                                                                                                                                                                                                                                                                                                                                                                                                                                                                                                                                                                                                                                                                                                                                                                                                                                                                                                                                                                                                                                                                                                                                                                                                                                                                                                                                                                                                                                                                                                                                                                                                                                                                                                                                                                                                                                                                                                                                                                                                                                                                                                                                                                                                                                                                                                                                                                                                                                                                                                                                                                                                                                                                                                                                                                                                                                                                                                                                                                                                                                                                                                                                                                                                                                                                                                                                                                                                                                                                                                                                                                                                                                                                                                 | see above                                                                               | Unidad de Investigación Médica de Yucatán (UIMY)                                                                                               | : Alejandra Garcia-Gasca; Alejandra Garcia-Gasca; Alejandra Hernández-Teran; Alejandro Sanchez-Flores; Alejandro Sánchez-Flores; Alfredo Herrera-Estrella; Alicia Ocaña-Mondragón; Andreu Comas-García; Angel Gustavo Salas-Lais; Antonio Loza Román; Bernardo Martínez-Miguel; Blanca Taboada; Brenda Irasema Maldonado-Meza; Bruno Gomez-Gil; Bruno Gomez-Gil; Carla Ivon Herrera-Najera; Carlos F. Arias; Celia Boukadida; Clara Esperanza Santacruz-Tinoco; Concepcion Grajales-Muñiz; Consorcio Mexicano de Vigilancia Genómica (CoViGen-Mex). Authors (in alphabetical order): Julio Elias Alvarado-Yaah; Cristóbal Cháidez-Quiróz; Célida Duque Molina; Celida Martínez- Rodríguez; Daniel Fregoso-Rueda; Daniel Lira Morales; Eduardo Becerri-Vargas; Eduardo Rivera-Martínez; Fernando Fontove-Herrera; Fidencio Mejía-Nepomuceno; Francisco Pulido; Gabriel Chavira-Trujillo; Gloria Elena Espinosa-Ayala; Gloria María Molina-Salinas; Gloria Vazquez; Hector Esteban Paz-Juárez; Hector Montoya-Fuentes; Helen Haydee Fernanda Ramirez-Plascencia; Irvin González-López; Jean Pierre González; Jesús Hernández; Joel Armando Vázquez-Pérez; Jorge Salas-Hernández; José Antonio Enciso-Moreno; José Arturo Martínez-Orozco; José Esteban Muñoz-Medina; José de Jesús Nuñez-Contreras; Juan Bautista Chale-Dzul; Julissa Enciso-Ibarra; Kathia Elizabeth Tapia-Díaz; Luis Alberto Ochoa-Carrera; Margarita Matías-Florentino; Mario Mujica-Sánchez; Marissa Perez-García; María Eugenia Jiménez-Corona; María Guadalupe Santiago-Mauricio; María Guadalupe de Jesús Mireles-Rivera; Nelly Sélem-Mojica; Pavel Isa; Ricardo Ciriá Merce; Ricardo Grande; Rosa María Gutiérrez Ríos; Rosa María Gutiérrez Ríos; Rosario Vazquez-Larios; Santiago Avila-Ríos; Selene Zárate; Susana Lopez; Verónica Mata-Haro; Victor Eduardo Garcia-Arias; Victor Hugo Borja-Aburto |                                                                                                                                                                                                                                                                                                                                  |
| EPI_ISL_2681089, EPI_ISL_2801642, EPI_ISL_4006336                                                                                                                                                                                                                                                                                                                                                                                                                                                                                                                                                                                                                                                                                                                                                                                                                                                                                                                                                                                                                                                                                                                                                                                                                                                                                                                                                                                                                                                                                                                                                                                                                                                                                                                                                                                                                                                                                                                                                                                                                                                                                                                                                                                                                                                                                                                                                                                                                                                                                                                                                                                                                                                                                                                                                                                                                                                                                                                                                                                                                                                                                                                                                                                                                                                                                                                                                                                                                                                                                                                                                                                                                                                                                                                                                                                                                                                                                                                                                                                                                     | Unidad de Investigación Médica de Yucatán (UIMY)                                        | Instituto de Biotecnología de la UNAM                                                                                                          | : Alejandra Garcia-Gasca; Alejandra Hernández-Teran; Alejandro Sánchez-Flores; Alfredo Herrera-Estrella; Alicia Ocaña-Mondragón; Andreu Comas-García; Angel Gustavo Salas-Lais; Antonio Loza Román; Bernardo Martínez-Miguel; Blanca Taboada; Brenda Irasema Maldonado-Meza; Bruno Gomez-Gil; Carla Ivon Herrera-Najera; Carlos F. Arias; Celia Boukadida; Clara Esperanza Santacruz-Tinoco; Concepcion Grajales-Muñiz; Consorcio Mexicano de Vigilancia Genómica (CoViGen-Mex). Authors (in alphabetical order): Julio Elias Alvarado-Yaah; Cristóbal Cháidez-Quiróz; Célida Duque Molina; Celida Martínez- Rodríguez; Daniel Fregoso-Rueda; Daniel Lira Morales; Eduardo Becerri-Vargas; Fernando Fontove-Herrera; Fidencio Mejía-Nepomuceno; Francisco Pulido; Gloria Elena Espinosa-Ayala; Gloria María Molina-Salinas; Gloria Vazquez; Hector Esteban Paz-Juárez; Hector Montoya-Fuentes; Helen Haydee Fernanda Ramirez-Plascencia; Irvin González-López; Jean Pierre González; Jesús Hernández; Joel Armando Vázquez-Pérez; Jorge Salas-Hernández; José Antonio Enciso-Moreno; José Arturo Martínez-Orozco; José Esteban Muñoz-Medina; José de Jesús Nuñez-Contreras; Juan Bautista Chale-Dzul; Julissa Enciso-Ibarra; Kathia Elizabeth Tapia-Díaz; Luis Alberto Ochoa-Carrera; Margarita Matías-Florentino; Mario Mujica-Sánchez; Marissa Perez-García; María Eugenia Jiménez-Corona; María Guadalupe Santiago-Mauricio; María Guadalupe de Jesús Mireles-Rivera; Nelly Sélem-Mojica; Pavel Isa; Ricardo Ciriá Merce; Ricardo Grande; Rosa María Gutiérrez Ríos; Rosa María Gutiérrez Ríos; Rosario Vazquez-Larios; Santiago Avila-Ríos; Selene Zárate; Susana Lopez; Verónica Mata-Haro; Victor Eduardo Garcia-Arias; Victor Hugo Borja-Aburto                                                                                                                       |                                                                                                                                                                                                                                                                                                                                  |
| EPI_ISL_2402019, EPI_ISL_2402049                                                                                                                                                                                                                                                                                                                                                                                                                                                                                                                                                                                                                                                                                                                                                                                                                                                                                                                                                                                                                                                                                                                                                                                                                                                                                                                                                                                                                                                                                                                                                                                                                                                                                                                                                                                                                                                                                                                                                                                                                                                                                                                                                                                                                                                                                                                                                                                                                                                                                                                                                                                                                                                                                                                                                                                                                                                                                                                                                                                                                                                                                                                                                                                                                                                                                                                                                                                                                                                                                                                                                                                                                                                                                                                                                                                                                                                                                                                                                                                                                                      | Unidad de Investigación Médica de Yucatán (UIMY)                                        | Unidad de Genomica Avanzada                                                                                                                    | : Alejandra Sanchez-Flores; Alfredo Herrera-Estrella; Alicia Ocaña-Mondragón; Angel Gustavo Salas-Lais; Bernardo Martínez-Miguel; Blanca Taboada; Brenda Irasema Maldonado-Meza; Carla Ivon Herrera-Najera; Carlos F. Arias; Celia Boukadida; Clara Esperanza Santacruz-Tinoco; Concepcion Grajales-Muñiz; Consorcio Mexicano de Vigilancia Genómica (CoViGen-Mex). Authors (in alphabetical order): Julio Elias Alvarado-Yaah; Fernando Fontove-Herrera; Francisco Pulido; Gloria Elena Espinosa-Ayala; Gloria María Molina-Salinas; Gloria Vazquez; Hector Esteban Paz-Juárez; Hector Montoya-Fuentes; Helen Haydee Fernanda Ramirez-Plascencia; Jorge Ivan Salinal-Navarez; José Antonio Enciso-Moreno; José Esteban Muñoz-Medina; José de Jesús Nuñez-Contreras; Juan Bautista Chale-Dzul; Luis Alberto Ochoa-Carrera; Margarita Matías-Florentino; María Guadalupe Santiago-Mauricio; María Guadalupe de Jesús Mireles-Rivera; Nelly Sélem-Mojica; Pavel Isa; Ricardo Ciriá Merce; Ricardo Grande; Santiago Avila-Ríos; Victor Hugo Borja-Aburto                                                                                                                                                                                                                                                                                                                                                                                                                                                                                                                                                                                                                                                                                                                                                                                                                        |                                                                                                                                                                                                                                                                                                                                  |
| EPI_ISL_1008714                                                                                                                                                                                                                                                                                                                                                                                                                                                                                                                                                                                                                                                                                                                                                                                                                                                                                                                                                                                                                                                                                                                                                                                                                                                                                                                                                                                                                                                                                                                                                                                                                                                                                                                                                                                                                                                                                                                                                                                                                                                                                                                                                                                                                                                                                                                                                                                                                                                                                                                                                                                                                                                                                                                                                                                                                                                                                                                                                                                                                                                                                                                                                                                                                                                                                                                                                                                                                                                                                                                                                                                                                                                                                                                                                                                                                                                                                                                                                                                                                                                       | Unidad de Patología Clínica                                                             | Instituto de diagnóstico y Referencia Epidemiológicos (INDRE) Departamento de Virología                                                        | Abril Rodriguez-Maldonado; Claudia Wong-Arambula; Ernesto Ramirez-Gonzalez.; Fabiola Garces-Ayala; Gisela Barrera-Badillo; Irma Lopez-Martinez; Lucia Hernandez-Rivas; Natividad Cruz-Ortiz; Tatiana Nunez-Garcia                                                                                                                                                                                                                                                                                                                                                                                                                                                                                                                                                                                                                                                                                                                                                                                                                                                                                                                                                                                                                                                                                                                                                                                                                                                                                                                                                                                                                                                                                                                                                                                                                                                            |                                                                                                                                                                                                                                                                                                                                  |
| EPI_ISL_3245436                                                                                                                                                                                                                                                                                                                                                                                                                                                                                                                                                                                                                                                                                                                                                                                                                                                                                                                                                                                                                                                                                                                                                                                                                                                                                                                                                                                                                                                                                                                                                                                                                                                                                                                                                                                                                                                                                                                                                                                                                                                                                                                                                                                                                                                                                                                                                                                                                                                                                                                                                                                                                                                                                                                                                                                                                                                                                                                                                                                                                                                                                                                                                                                                                                                                                                                                                                                                                                                                                                                                                                                                                                                                                                                                                                                                                                                                                                                                                                                                                                                       | Unidade de apoio ao diagnostico da COVID - UNADIG                                       | Bioinformatics Laboratory / LNCC                                                                                                               | Alessandra P Lamacra; Alexandra L Gerber; Amílcar Tanuri; Ana Paula de C Guimarães; Ana Tereza R Vasconcelos; Andrea Cony Cavalcanti; Caio Luiz Pereira Ribeiro; Cintia Polcarco; Claudia Maria Braga de Mello; Cristiane Gomes da Silva; Douglas Terra Machado; Erica Ramos dos Santos Nascimento; Fernando Leitao dos Santos; Flavio Dias da Silva; Gleudson da Silva de Oliveira; Leandro Magalhães de Souza; Liliane Calvancante; Luiz G P de Almeida; Marcio Henrique de Oliveira Garcia; Mario Sergio Ribeiro; Ricardo Jose Barbosa Salimano; Ronaldo da Silva F Jr; Silvia Carvalho                                                                                                                                                                                                                                                                                                                                                                                                                                                                                                                                                                                                                                                                                                                                                                                                                                                                                                                                                                                                                                                                                                                                                                                                                                                                                   |                                                                                                                                                                                                                                                                                                                                  |
| EPI_ISL_3184143, EPI_ISL_3184281, EPI_ISL_6563375, EPI_ISL_6563384, EPI_ISL_6563421, EPI_ISL_6563438                                                                                                                                                                                                                                                                                                                                                                                                                                                                                                                                                                                                                                                                                                                                                                                                                                                                                                                                                                                                                                                                                                                                                                                                                                                                                                                                                                                                                                                                                                                                                                                                                                                                                                                                                                                                                                                                                                                                                                                                                                                                                                                                                                                                                                                                                                                                                                                                                                                                                                                                                                                                                                                                                                                                                                                                                                                                                                                                                                                                                                                                                                                                                                                                                                                                                                                                                                                                                                                                                                                                                                                                                                                                                                                                                                                                                                                                                                                                                                  | Unilabs                                                                                 | Karolinska University Hospital                                                                                                                 | Annelie Bjerkner; Isak Sylvin; Jan Albert; Karolina Ininbergs; Lina Guerra Blomqvist; Lynda Eneh; Martin Ekman; Martina Wahlund; Robert Dyrda; Sandra Brodsson; Tanja Normark; Tobias Allander; Valterri Wirta; Zhibing Yun                                                                                                                                                                                                                                                                                                                                                                                                                                                                                                                                                                                                                                                                                                                                                                                                                                                                                                                                                                                                                                                                                                                                                                                                                                                                                                                                                                                                                                                                                                                                                                                                                                                  |                                                                                                                                                                                                                                                                                                                                  |
| EPI_ISL_412980                                                                                                                                                                                                                                                                                                                                                                                                                                                                                                                                                                                                                                                                                                                                                                                                                                                                                                                                                                                                                                                                                                                                                                                                                                                                                                                                                                                                                                                                                                                                                                                                                                                                                                                                                                                                                                                                                                                                                                                                                                                                                                                                                                                                                                                                                                                                                                                                                                                                                                                                                                                                                                                                                                                                                                                                                                                                                                                                                                                                                                                                                                                                                                                                                                                                                                                                                                                                                                                                                                                                                                                                                                                                                                                                                                                                                                                                                                                                                                                                                                                        | Union Hospital of Tongji Medical College, Huazhong University of Science and Technology | Hubei Provincial Center for Disease Control and Prevention                                                                                     | Bin Fang; Bo Yang; Bo Yu; Faxian Zhan; Guojun Ye; Jing Li; Junqiang Xu; Kun Cai; Linli Liu; Xiang Li; Xiao Yu; Xixiang Huo; Yongzhong Jiang.                                                                                                                                                                                                                                                                                                                                                                                                                                                                                                                                                                                                                                                                                                                                                                                                                                                                                                                                                                                                                                                                                                                                                                                                                                                                                                                                                                                                                                                                                                                                                                                                                                                                                                                                 |                                                                                                                                                                                                                                                                                                                                  |
| EPI_ISL_411951                                                                                                                                                                                                                                                                                                                                                                                                                                                                                                                                                                                                                                                                                                                                                                                                                                                                                                                                                                                                                                                                                                                                                                                                                                                                                                                                                                                                                                                                                                                                                                                                                                                                                                                                                                                                                                                                                                                                                                                                                                                                                                                                                                                                                                                                                                                                                                                                                                                                                                                                                                                                                                                                                                                                                                                                                                                                                                                                                                                                                                                                                                                                                                                                                                                                                                                                                                                                                                                                                                                                                                                                                                                                                                                                                                                                                                                                                                                                                                                                                                                        | Unit for Laboratory Development and Technology Transfer, Public Health Agency of Sweden | Unit for Laboratory Development and Technology Transfer, Public Health Agency of Sweden                                                        | Appelberg, S.; Bengner, M.; Brave, A.; Lind Karlberg, M.; Lindsjö, O.; Montell, V.; Muradrasoli; Palmerus, M.; S. and Tegmark-Wisell, K.                                                                                                                                                                                                                                                                                                                                                                                                                                                                                                                                                                                                                                                                                                                                                                                                                                                                                                                                                                                                                                                                                                                                                                                                                                                                                                                                                                                                                                                                                                                                                                                                                                                                                                                                     |                                                                                                                                                                                                                                                                                                                                  |
| EPI_ISL_4740388, EPI_ISL_3038229                                                                                                                                                                                                                                                                                                                                                                                                                                                                                                                                                                                                                                                                                                                                                                                                                                                                                                                                                                                                                                                                                                                                                                                                                                                                                                                                                                                                                                                                                                                                                                                                                                                                                                                                                                                                                                                                                                                                                                                                                                                                                                                                                                                                                                                                                                                                                                                                                                                                                                                                                                                                                                                                                                                                                                                                                                                                                                                                                                                                                                                                                                                                                                                                                                                                                                                                                                                                                                                                                                                                                                                                                                                                                                                                                                                                                                                                                                                                                                                                                                      | Unit forensik Hospital Kepala Batas United Christian Hospital                           | iPROMISE, UTM Hong Kong Department of Health                                                                                                   | Ariza Adnan; Fadliyah Mohd Nor; Lim Wai Feng; Mohd Asif Mohd Sukri; Mohd Nur Fakhruzzaman Norrihaz; Mohd Zaki Salleh; Sazzli Shahlan Kassim; Siti Farah Alwani Mohd Nani; Siti Hamimah Sheikh Abdul Kadir; Teh Lay Lam; Wang Seok Mui Andy Y.Y. Cheung; Brian H.M. Sit; Dominic N.C. Tsang; Norman H.K. Lam; Ken H.L. Lam; Rickjason C.W. Chan; T.C. Kwong                                                                                                                                                                                                                                                                                                                                                                                                                                                                                                                                                                                                                                                                                                                                                                                                                                                                                                                                                                                                                                                                                                                                                                                                                                                                                                                                                                                                                                                                                                                   |                                                                                                                                                                                                                                                                                                                                  |



|                                                                                                                                                                                                                                                                                                 |                                                                                                                                  |                                                                                                                                   |                                                                                                                                                                                                                                                                                                                                                                                                                                                                                                                                                                                                                                                   |
|-------------------------------------------------------------------------------------------------------------------------------------------------------------------------------------------------------------------------------------------------------------------------------------------------|----------------------------------------------------------------------------------------------------------------------------------|-----------------------------------------------------------------------------------------------------------------------------------|---------------------------------------------------------------------------------------------------------------------------------------------------------------------------------------------------------------------------------------------------------------------------------------------------------------------------------------------------------------------------------------------------------------------------------------------------------------------------------------------------------------------------------------------------------------------------------------------------------------------------------------------------|
| EPI_ISL_464048                                                                                                                                                                                                                                                                                  | Unity Health Toronto                                                                                                             | Ontario Institute for Cancer Research                                                                                             | Annette Gower; Bernard Lam; Illica Lungu; Jared Simpson; Jeremy Johns; Karel Boissinot; Larissa M. Matukas; Mark Downing; Paul Krzyzanowski; Philip Zuzarte; Ramzi Fattouh; Richard de Borja; Samira Mubareka; TIBDN                                                                                                                                                                                                                                                                                                                                                                                                                              |
| EPI_ISL_3023790,<br>EPI_ISL_3023836,<br>EPI_ISL_3023863,<br>EPI_ISL_3023877,<br>EPI_ISL_3023890,<br>EPI_ISL_3024029                                                                                                                                                                             | Universidad Autonoma de Yucatan                                                                                                  | New York Genome Center                                                                                                            | Amy Baldwin; Andre Corvelo; Aviles-Gomez E; Ayora-Talavera G; Chan-Gasca M; Dayna M. Oschwald; Flores-Quintal F; Granja-Perez P; Lopez-Coral L.; Michael Zody; Samantha Fennessey; Tom Maniatis; Villanueva-Jorge S; Yam-Pool E                                                                                                                                                                                                                                                                                                                                                                                                                   |
| EPI_ISL_3477568                                                                                                                                                                                                                                                                                 | Universidad del Valle, LDAB-Laboratorio de Diagnostico de Agentes Biologicos                                                     | Universidad del Valle, TAO-Lab, VIREM, NEAS Network                                                                               | Andres Castillo; Beatriz Parra & COVID-19 Team Univalle; Diana López-Alvarez; Nelson Rivera Franco                                                                                                                                                                                                                                                                                                                                                                                                                                                                                                                                                |
| EPI_ISL_3230063                                                                                                                                                                                                                                                                                 | University Campus Bio-Medico of Rome (UCBM)                                                                                      | University Campus Bio-Medico of Rome (UCBM)                                                                                       | Angeletti S.; De Florio L.; Fogolari M.; Francesconi M.; Lintas C.; Riva E.; Veralli R.                                                                                                                                                                                                                                                                                                                                                                                                                                                                                                                                                           |
| EPI_ISL_5822531,<br>EPI_ISL_5886023,<br>EPI_ISL_6512807,<br>EPI_ISL_7378185,<br>EPI_ISL_7378210                                                                                                                                                                                                 | University Clinical Hospital of Mostar, Department of Microbiology and Molecular Diagnostics                                     | University of Sarajevo, Veterinary Faculty, Laboratory for Molecular Diagnostic and Research                                      | Goletic S.; Goletic T; Herceg I; Hodzic A; Jazic A; Nicevic M.; Ostojic M; Sabic E; Skocibusic S; Softic A; Terzic I                                                                                                                                                                                                                                                                                                                                                                                                                                                                                                                              |
| EPI_ISL_665152,<br>EPI_ISL_1248463                                                                                                                                                                                                                                                              | University College London Hospital                                                                                               | COVID-19 Genomics UK (COG-UK) Consortium                                                                                          | Catherine Houlihan; Dan Frampton; Dr Catherine Houlihan; Dr Daniel Frampton; Dr Judith Heaney; Dr Moira Spyer; Dr Paul Grant and Dr Eleni Nastouli; Judith Heaney; Matthew Byott; Moira Spyer and Eleni Nastouli; Stuart Kirk                                                                                                                                                                                                                                                                                                                                                                                                                     |
| EPI_ISL_741229,<br>EPI_ISL_3288051,<br>EPI_ISL_3288182,<br>EPI_ISL_3288327,<br>EPI_ISL_3288364,<br>EPI_ISL_3288405                                                                                                                                                                              | University College London, Great Ormond Street Hospital for Children NHS Foundation Trust, Imperial College Healthcare NHS Trust | COVID-19 Genomics UK (COG-UK) Consortium                                                                                          | Alison Holmes; Charlotte Williams; Helena Tutill; Jacqueline Findlay; James Price; Judith Breuer; Julianne Brown; Kathryn Harris; Leysa Forrest; Marius Cotic; Mark Kristiansen; Nadua Bayzid; Paola Niola; Paola Resende Silva; Patricia Dyal; Paul Randell; Rachel Williams; Samuel Weeks; Sergi Castellano; Sunando Roy; Tony Brooks; Yasmin Panchbhaya                                                                                                                                                                                                                                                                                        |
| EPI_ISL_492503                                                                                                                                                                                                                                                                                  | University College London, Great Ormond Street Hospital for Children NHS Foundation Trust, Imperial College Healthcare NHS Trust | Wellcome Sanger Institute for the COVID-19 Genomics UK (COG-UK) consortium                                                        | Alison Holmes; Charlotte Williams; Cordelia Langford; David K. Jackson; Dominic Kwiatkowski; Ewan Harrison; Helena Tutill; Ian Johnston; Jacqueline Findlay; James Price; John Sillitoe on behalf of the Wellcome Sanger Institute COVID-19 Surveillance Team ( <a href="http://www.sanger.ac.uk/covid-team">http://www.sanger.ac.uk/covid-team</a> ); Judith Breuer and Alex Alderton; Julianne Brown; Kathryn Harris; Leysa Forrest; Mark Kristiansen; Paola Niola; Paola Resende Silva; Patricia Dyal; Paul Randell; Rachel Williams; Roberto Amato; Sam Weeks; Sergi Castellano; Sonia Goncalves; Sunando Roy; Tony Brooks; Yasmin Panchbhaya |
| EPI_ISL_418279,<br>EPI_ISL_418433,<br>EPI_ISL_418438                                                                                                                                                                                                                                            | University Hospital Basel, Clinical Virology                                                                                     | University Hospital Basel, Clinical Bacteriology                                                                                  | Egli, A.; Hirsch, H.; Leuzinger, K.; Mari, A.; Roloff, T.; Seth-Smith, H.                                                                                                                                                                                                                                                                                                                                                                                                                                                                                                                                                                         |
| EPI_ISL_418271                                                                                                                                                                                                                                                                                  | University Hospital Basel, Clinical Virology                                                                                     | University Hospital Basel, Labormedizin                                                                                           | Egli, A.; Hirsch, H.; Leuzinger, K.; Mari, A.; Roloff, T.; Seth-Smith, H.                                                                                                                                                                                                                                                                                                                                                                                                                                                                                                                                                                         |
| EPI_ISL_5938275                                                                                                                                                                                                                                                                                 | University Hospital Hradec Kralove                                                                                               | University Hospital Hradec Kralove                                                                                                | Helena Kovarikova; Lenka Rysava; Marketa Gancarcikova; Monika Berankova                                                                                                                                                                                                                                                                                                                                                                                                                                                                                                                                                                           |
| EPI_ISL_6514504<br>EPI_ISL_1694564                                                                                                                                                                                                                                                              | University Hospital Ostrava<br>University Hospital for Infectious Diseases                                                       | University Hospital Ostrava<br>Croatian Institute of Public Health                                                                | Chorzempa; Spulerova<br>Irena Tabain; Ivana Ferenčak                                                                                                                                                                                                                                                                                                                                                                                                                                                                                                                                                                                              |
| EPI_ISL_3229851, EPI_ISL_3229859, EPI_ISL_3229872, EPI_ISL_3233473, EPI_ISL_3233487, EPI_ISL_3233492, EPI_ISL_3233506                                                                                                                                                                           | see above<br>University Hospital of Northern Norway, Department for Microbiology and Infectious Disease Control                  | Norwegian Institute of Public Health, Department of Virology                                                                      | Atiya R Ali; Debec Nadia; Engebretsen Serina Beate; Garcia Lorente Ignacio; Hilde Elshaug; Hilde Vollan; Jon Bråte; Kamilla Heddeland Insteffjord; Karoline Bragstad; Kathrine Stene-Johansen; Line Victoria Moen; Marie Paulsen Madsen; Olav Hungnes; Pedersen Benedikte Nevjen; Rasmus Riis Kopperud                                                                                                                                                                                                                                                                                                                                            |
| EPI_ISL_1247762,<br>EPI_ISL_1308878                                                                                                                                                                                                                                                             | University Hospitals Of Leicester NHS Trust and DeepSeq Nottingham                                                               | COVID-19 Genomics UK (COG-UK) Consortium                                                                                          | Christopher Holmes; Christopher Moore; Fei Sang; Joeseph Chappell; Johnny Debebe; Jonathan Ball; Julian Tang; Karlie Fallon; Matthew Carlisle; Matthew Loose; Nadine Holmes; Patrick McClure; Paul Bird; Thomas Helmer; Victoria Wright                                                                                                                                                                                                                                                                                                                                                                                                           |
| EPI_ISL_415456,<br>EPI_ISL_415458,<br>EPI_ISL_415459,<br>EPI_ISL_415698,<br>EPI_ISL_415705                                                                                                                                                                                                      | University Hospitals of Geneva Laboratory of Virology                                                                            | University Hospitals of Geneva Laboratory of Virology                                                                             | Laubscher F.                                                                                                                                                                                                                                                                                                                                                                                                                                                                                                                                                                                                                                      |
| EPI_ISL_1040365, EPI_ISL_1708195, EPI_ISL_1811122, EPI_ISL_1811164, EPI_ISL_3262304, EPI_ISL_3262313, EPI_ISL_3262341, EPI_ISL_3262342, EPI_ISL_3262376, EPI_ISL_3262398                                                                                                                        | see above<br>University Hospitals of Geneva, Laboratory of Virology                                                              | HUG, Laboratory of Virology and the Health2030 Genome Center                                                                      | Aline Mamin; Ana Rita Goncalves; Cedric Howald; Deborah Penet; Emmanouil Dermitzakis; Francisco Perez; Henri Pegeot; Ioannis Xenarios; Keith Harshman; Laurent Kaiser; Lorenzo Cerutti; Melyssa Elies; Samuel Cordey                                                                                                                                                                                                                                                                                                                                                                                                                              |
| EPI_ISL_1653934,<br>EPI_ISL_1653936                                                                                                                                                                                                                                                             | University of Bari Biomedical Sciences and Human Oncology                                                                        | University of Bari Biomedical Sciences and Human Oncology                                                                         | Accogli M.; Chironna M.; Loconsole D.; Sallustio A.                                                                                                                                                                                                                                                                                                                                                                                                                                                                                                                                                                                               |
| EPI_ISL_2484217,<br>EPI_ISL_2484219                                                                                                                                                                                                                                                             | University of Brescia - Dept. of Molecular and Translational Medicine                                                            | Istituto Zooprofilattico Sperimentale della Lombardia e dell'Emilia Romagna (IZSLER), Risk Analysis and Genomic Epidemiology Unit | Caccuri Francesca; Caruso Arnaldo; Erika Scaltriti; Fiorentini Simona; Marina Morganti; Messali Serena; Stefano Pongolini; Zani Alberto                                                                                                                                                                                                                                                                                                                                                                                                                                                                                                           |
| EPI_ISL_671434                                                                                                                                                                                                                                                                                  | University of Debrecen, Department of Medical Microbiology                                                                       | National Laboratory of Virology, Szentágotthai Research Centre                                                                    | Balázs Somogyi; Brigitta Zana; Endre Gábor Tóth; Eszter Csoma; Ferenc Jakab; Gábor Kemenesi                                                                                                                                                                                                                                                                                                                                                                                                                                                                                                                                                       |
| EPI_ISL_1247516                                                                                                                                                                                                                                                                                 | University of Exeter                                                                                                             | COVID-19 Genomics UK (COG-UK) Consortium                                                                                          | Aaron Jeffries; Audrey Farbos; Ben Temperton; Jane Masoli; Joanna Warwick-Duggdale; Michelle Michelsen; Robyn Manley; Stephen Michell                                                                                                                                                                                                                                                                                                                                                                                                                                                                                                             |
| EPI_ISL_2100501                                                                                                                                                                                                                                                                                 | University of Health Sciences                                                                                                    | Quadram Institute Bioscience                                                                                                      | Alam Khan; Alexander J Trotter; Alison E. Mather; Almira Shafiq; Alp Aydin; Ana P. Tedim; Anastasia Kolyva; Andrew Bell; Andrew J. Page; Claire Stuart; Dave J. Baker; Gemma L. Kay; Javed Akram; John Wain; Justin O'Grady; Leonardo de Oliveira Martins; Lizzie Meadows; Maria Diaz; Mark Webber; Muhammad Bilal Sarwar; Muhammad Roman; Muhammed Yasir; Nabil-Fareed Alikhan; Nadeem Afzal; Ngozi Elumogo; Nicholas M. Thomson; Rachael Stanley; Rachel Gilroy; Reenesh Prakash; Samir Dervisevic; Samuel Bloomfield; Shah Jahan; Sidra-tul-muntaha; Steven Rudder; Thanh Le-Viet                                                              |
| EPI_ISL_1040510,<br>EPI_ISL_1660751,<br>EPI_ISL_1660760,<br>EPI_ISL_3260389                                                                                                                                                                                                                     | University of Liège COVID-19 testing center                                                                                      | GIGA Medical Genomics                                                                                                             | Bouchra Boujemla; Claire Gourzonès; Cécile Meex; Fabrice Bureau; Keith Durkin; Laurent Gillet; Maria Artes; Marie-Pierre Hayette; Nadine Cambisano; Nathalie Renotte; Olivier Ek; Pierrette Melin; Raphaël Boreux; Sébastien Bontems; Vincent Bours; Wouter Coppieters                                                                                                                                                                                                                                                                                                                                                                            |
| EPI_ISL_682112,<br>EPI_ISL_1200928,<br>EPI_ISL_1291589,<br>EPI_ISL_1491480,<br>EPI_ISL_1651610,<br>EPI_ISL_1731770                                                                                                                                                                              | University of Michigan Clinical Microbiology Laboratory                                                                          | Lauring Lab, University of Michigan, Department of Microbiology and Immunology                                                    | Valesano                                                                                                                                                                                                                                                                                                                                                                                                                                                                                                                                                                                                                                          |
| EPI_ISL_3269527,<br>EPI_ISL_3269573                                                                                                                                                                                                                                                             | University of Mississippi Medical Center, Department of Pathology                                                                | University of Mississippi Medical Center, Molecular and Genomics Core Facility                                                    | Ashley C. Johnson; D. Ashley Robinson; Ithiel J. Frame; Krishna K. Ayyalasomayajula; Michael R. Garrett; Wenjie Wu                                                                                                                                                                                                                                                                                                                                                                                                                                                                                                                                |
| EPI_ISL_524443                                                                                                                                                                                                                                                                                  | University of Washington Virology Lab                                                                                            | Laboratory Medicine, University of Washington                                                                                     | Greninger, A.; Jerome, K.; Roychoudhury, P.                                                                                                                                                                                                                                                                                                                                                                                                                                                                                                                                                                                                       |
| EPI_ISL_416491, EPI_ISL_416523, EPI_ISL_417200, EPI_ISL_417201, EPI_ISL_417202, EPI_ISL_417203, EPI_ISL_417204, EPI_ISL_417504, EPI_ISL_417508, EPI_ISL_417512, EPI_ISL_417513, EPI_ISL_417514, EPI_ISL_417515, EPI_ISL_417516, EPI_ISL_417517, EPI_ISL_428278, EPI_ISL_831618, EPI_ISL_1252585 | see above<br>University of Wisconsin-Madison AIDS Vaccine Research Laboratories                                                  | University of Wisconsin-Madison AIDS Vaccine Research Laboratories                                                                | Gage Moreno; Katarina Braun; et al. AIDS Vaccine Research Laboratories                                                                                                                                                                                                                                                                                                                                                                                                                                                                                                                                                                            |
| EPI_ISL_1567105                                                                                                                                                                                                                                                                                 | Universitätsklinikum Münster Institut für Virologie                                                                              | Robert Koch Institute                                                                                                             |                                                                                                                                                                                                                                                                                                                                                                                                                                                                                                                                                                                                                                                   |
| EPI_ISL_1692823, EPI_ISL_3270630, EPI_ISL_3270634, EPI_ISL_3270641, EPI_ISL_3270642, EPI_ISL_3270646, EPI_ISL_3270660, EPI_ISL_3270664, EPI_ISL_3270667, EPI_ISL_3270668, EPI_ISL_3270675, EPI_ISL_3270682, EPI_ISL_3270683, EPI_ISL_3270686, EPI_ISL_3270703, EPI_ISL_3270808, EPI_ISL_3270815 | see above<br>Università Federico II - Dipartimento di scienze mediche traslazionali - Napoli                                     | Telethon Institute of Genetics and Medicine (TIGEM)                                                                               | Antonio Grimaldi Patrizia Annunziata Francesco Panariello Teresa Giuliano Michele Cennamo Valentina Bouche Chiara Colantuono Lucio Di Filippo Mariano Fiorenza Anna Manfredi Marcello Salvi Giuseppe Portella Andrea Ballabio Davide Cacchiarelli                                                                                                                                                                                                                                                                                                                                                                                                 |
| EPI_ISL_1299558, EPI_ISL_1919642, EPI_ISL_2001434, EPI_ISL_2131475, EPI_ISL_2308635, EPI_ISL_2600751, EPI_ISL_2600752, EPI_ISL_2919107, EPI_ISL_3030444, EPI_ISL_3186050, EPI_ISL_3231202, EPI_ISL_3231235, EPI_ISL_4998570                                                                     | see above<br>Università degli Studi di Perugia                                                                                   | Istituto Zooprofilattico Sperimentale dell'Abruzzo e Molise "G. Caporale"                                                         | Ancora M; Biagetti M; Calistri P; Camilloni B; Cammà C; Curini V; Delli Compagni E; Di Domenico M; Di Pasquale A; Giammarioni M; Lorusso A; Mangone I; Marccacci M; Mencacci A; Puglia I; Rinaldi A; Savini G; Scialabba S                                                                                                                                                                                                                                                                                                                                                                                                                        |
| EPI_ISL_3259953                                                                                                                                                                                                                                                                                 | Universität Zürich                                                                                                               | Institute of Medical Virology                                                                                                     | Alexandra Trkola; Annette Audigé; Catharine Aquino; Cyril Shah; Daniel Ehrsam; Gabriela Ziltener; Guido Bloemberg; Hubert Rehrauer; Isabel Stürmer; Joel Wirz; Jon Huder; Jürg Böni; Kevin Steiner; Maria Grünberg; Maryam Zaheri; Michael Huber; Riccarda Capaul; Stefan Schmutz; Verena Kufner; Weihong Qi                                                                                                                                                                                                                                                                                                                                      |

|                                                                                                                                                                                                                                                                                                                                                                                                                                                                                                                                                                                                                                                                                                                                                                                                                                                                                                                                                                                                                                                                                                                                                                                                                                                                                                                                                                                                                                                                                                                                                   |                                                                                                                                                               |                                                                                                                                                                                                                                             |                                                                                                                                                                                                                                                                                                                                                                                                                                                                                                                                                                                                                                                                                                  |
|---------------------------------------------------------------------------------------------------------------------------------------------------------------------------------------------------------------------------------------------------------------------------------------------------------------------------------------------------------------------------------------------------------------------------------------------------------------------------------------------------------------------------------------------------------------------------------------------------------------------------------------------------------------------------------------------------------------------------------------------------------------------------------------------------------------------------------------------------------------------------------------------------------------------------------------------------------------------------------------------------------------------------------------------------------------------------------------------------------------------------------------------------------------------------------------------------------------------------------------------------------------------------------------------------------------------------------------------------------------------------------------------------------------------------------------------------------------------------------------------------------------------------------------------------|---------------------------------------------------------------------------------------------------------------------------------------------------------------|---------------------------------------------------------------------------------------------------------------------------------------------------------------------------------------------------------------------------------------------|--------------------------------------------------------------------------------------------------------------------------------------------------------------------------------------------------------------------------------------------------------------------------------------------------------------------------------------------------------------------------------------------------------------------------------------------------------------------------------------------------------------------------------------------------------------------------------------------------------------------------------------------------------------------------------------------------|
| EPI_ISL_1039828                                                                                                                                                                                                                                                                                                                                                                                                                                                                                                                                                                                                                                                                                                                                                                                                                                                                                                                                                                                                                                                                                                                                                                                                                                                                                                                                                                                                                                                                                                                                   | UniversitätsSpital Zürich                                                                                                                                     | Institute of Medical Virology, University of Zurich                                                                                                                                                                                         | Alexandra Trkola; Annette Audigé; Cyril Shah; Guido Bloembergen; Jon Huder; Jürg Böni; Kevin Steiner; Maria Grünberg; Maryam Zaheri; Michael Huber; Riccarda Capaul; Stefan Schmutz; Verena Kufner                                                                                                                                                                                                                                                                                                                                                                                                                                                                                               |
| EPI_ISL_3715133                                                                                                                                                                                                                                                                                                                                                                                                                                                                                                                                                                                                                                                                                                                                                                                                                                                                                                                                                                                                                                                                                                                                                                                                                                                                                                                                                                                                                                                                                                                                   | Universitätsklinikum Heidelberg                                                                                                                               | Robert Koch Institute                                                                                                                                                                                                                       |                                                                                                                                                                                                                                                                                                                                                                                                                                                                                                                                                                                                                                                                                                  |
| EPI_ISL_1434416, EPI_ISL_1439708                                                                                                                                                                                                                                                                                                                                                                                                                                                                                                                                                                                                                                                                                                                                                                                                                                                                                                                                                                                                                                                                                                                                                                                                                                                                                                                                                                                                                                                                                                                  | Universitätsklinikum Leipzig - Institut für Medizinische Mikrobiologie und Virologie virologisches Labor                                                      | Robert Koch Institute                                                                                                                                                                                                                       |                                                                                                                                                                                                                                                                                                                                                                                                                                                                                                                                                                                                                                                                                                  |
| EPI_ISL_1355380, EPI_ISL_1355394                                                                                                                                                                                                                                                                                                                                                                                                                                                                                                                                                                                                                                                                                                                                                                                                                                                                                                                                                                                                                                                                                                                                                                                                                                                                                                                                                                                                                                                                                                                  | Universitätsmedizin Mannheim                                                                                                                                  | Robert Koch Institute                                                                                                                                                                                                                       |                                                                                                                                                                                                                                                                                                                                                                                                                                                                                                                                                                                                                                                                                                  |
| EPI_ISL_2007055                                                                                                                                                                                                                                                                                                                                                                                                                                                                                                                                                                                                                                                                                                                                                                                                                                                                                                                                                                                                                                                                                                                                                                                                                                                                                                                                                                                                                                                                                                                                   | UniversitätsSpital Zürich                                                                                                                                     | Institute of Medical Virology                                                                                                                                                                                                               | Alexandra Trkola; Annette Audigé; Catharine Aquino; Cyril Shah; Daniel Ehrsam; Gabriela Ziltener; Guido Bloembergen; Hubert Rehrauser; Isabel Styrmer; Joel Wirz; Jon Huder; Jürg Böni; Kevin Steiner; Maria Grünberg; Maryam Zaheri; Michael Huber; Riccarda Capaul; Stefan Schmutz; Verena Kufner; Weihong Qi                                                                                                                                                                                                                                                                                                                                                                                  |
| EPI_ISL_2020955                                                                                                                                                                                                                                                                                                                                                                                                                                                                                                                                                                                                                                                                                                                                                                                                                                                                                                                                                                                                                                                                                                                                                                                                                                                                                                                                                                                                                                                                                                                                   | Urban Public Health Centre (UPHC), SECTOR-2, Gandhinagar                                                                                                      | Gujarat Biotechnology Research Centre                                                                                                                                                                                                       | Amit Kanani; Amrutal Patel; Bhargav Waghela; Bhumika Prajapati; Chaitanya Joshi; Dinesh Kumar; Janvi Ravul; Kalpesh Goswami; Madhvi Joshi; Nilen Patel; Nitesh Shah; Nitin Savaliya; Ramesh Pandit; Sonal Sharma; Tejendra Purohit; Twinkle Soni; Umang Mishra; Zarna Patel; Zuber Saiyed                                                                                                                                                                                                                                                                                                                                                                                                        |
| EPI_ISL_415544, EPI_ISL_417026, EPI_ISL_417027, EPI_ISL_417028, EPI_ISL_417959, EPI_ISL_417960, EPI_ISL_417964, EPI_ISL_417971, EPI_ISL_417972, EPI_ISL_417973, EPI_ISL_417974, EPI_ISL_417977, EPI_ISL_418963, EPI_ISL_418964, EPI_ISL_524076, EPI_ISL_524848, EPI_ISL_623172, EPI_ISL_623186, EPI_ISL_628951, EPI_ISL_628961, EPI_ISL_634926, EPI_ISL_943919, EPI_ISL_1300559, EPI_ISL_1483192, EPI_ISL_1701016, EPI_ISL_1701017, EPI_ISL_1701019, EPI_ISL_2081764, EPI_ISL_3262962, EPI_ISL_3262969, EPI_ISL_3263117, EPI_ISL_3263122, EPI_ISL_3263134, EPI_ISL_3263146, EPI_ISL_3263147, EPI_ISL_3263152, EPI_ISL_3263158, EPI_ISL_3263174, EPI_ISL_3263176, EPI_ISL_3263188, EPI_ISL_3263233, EPI_ISL_3263290, EPI_ISL_3263295, EPI_ISL_3263305, EPI_ISL_3263362, EPI_ISL_3263607, EPI_ISL_3263622, EPI_ISL_3263647, EPI_ISL_3263649, EPI_ISL_3263661, EPI_ISL_3263671, EPI_ISL_3263704, EPI_ISL_3263709, EPI_ISL_3263713, EPI_ISL_3263731, EPI_ISL_3263764, EPI_ISL_3263766, EPI_ISL_3263783, EPI_ISL_3263788, EPI_ISL_3268458, EPI_ISL_3268561, EPI_ISL_3268568, EPI_ISL_3268574, EPI_ISL_3268582, EPI_ISL_3268588, EPI_ISL_3268680, EPI_ISL_3268827, EPI_ISL_3268830, EPI_ISL_3268846, EPI_ISL_3268851, EPI_ISL_3268880, EPI_ISL_3268910, EPI_ISL_3268941, EPI_ISL_3268947, EPI_ISL_3269634, EPI_ISL_3269663, EPI_ISL_3269669, EPI_ISL_3269686, EPI_ISL_3269710, EPI_ISL_3269714, EPI_ISL_3269721, EPI_ISL_3269728, EPI_ISL_3269750, EPI_ISL_3269791, EPI_ISL_3269838, EPI_ISL_3269930, EPI_ISL_3270019, EPI_ISL_3270024, EPI_ISL_3904887 | Utsunomiya City Institute of Public Health and Environment                                                                                                    | David R. Hilliard; E. Susan Slechts; Erin L. Young; Erin Young; Jeffrey B. Stevenson; John Arm; Kelly F. Oakeson; Kelly Oakeson; Melanie A. Mallory; Michael T. Pyne; Olinto Linares-Perdomo; Pooja Gupta; Salika M. Shakir; Tara Gallagher |                                                                                                                                                                                                                                                                                                                                                                                                                                                                                                                                                                                                                                                                                                  |
| see above                                                                                                                                                                                                                                                                                                                                                                                                                                                                                                                                                                                                                                                                                                                                                                                                                                                                                                                                                                                                                                                                                                                                                                                                                                                                                                                                                                                                                                                                                                                                         | Utah Public Health Laboratory                                                                                                                                 | Utah Public Health Laboratory                                                                                                                                                                                                               |                                                                                                                                                                                                                                                                                                                                                                                                                                                                                                                                                                                                                                                                                                  |
| EPI_ISL_3183167                                                                                                                                                                                                                                                                                                                                                                                                                                                                                                                                                                                                                                                                                                                                                                                                                                                                                                                                                                                                                                                                                                                                                                                                                                                                                                                                                                                                                                                                                                                                   | Utsunomiya City Institute of Public Health and Environment                                                                                                    | Utsunomiya City Institute of Public Health and Environment                                                                                                                                                                                  | Akira Wakatsuki; Kentaro Itokawa; Makoto Kuroda; Masanori Hashino; Rina Tanaka; Tsuyoshi Sekizuka                                                                                                                                                                                                                                                                                                                                                                                                                                                                                                                                                                                                |
| EPI_ISL_3236509                                                                                                                                                                                                                                                                                                                                                                                                                                                                                                                                                                                                                                                                                                                                                                                                                                                                                                                                                                                                                                                                                                                                                                                                                                                                                                                                                                                                                                                                                                                                   | VIDOH (Virgin Islands Department of Health)                                                                                                                   | Grubaugh Lab - Yale School of Public Health                                                                                                                                                                                                 | Anderson Brito; Annie Watkins; Brett Ellis; Chaney Kalinich; Chantal Vogels; Esther Ellis; Isabel Ott; Jendai Richards; Jessica Rothman; Joseph Fauver; Kendall Billig; Mallery Breban; Marlon Lawrence; Mary Petrone; Nathan Grubaugh; TaLesia Aderohunmu; Tara Alpert; Tobias Koch                                                                                                                                                                                                                                                                                                                                                                                                             |
| EPI_ISL_3246127                                                                                                                                                                                                                                                                                                                                                                                                                                                                                                                                                                                                                                                                                                                                                                                                                                                                                                                                                                                                                                                                                                                                                                                                                                                                                                                                                                                                                                                                                                                                   | VIGILANCIA SANITARIA E VIG EPIDEMIOLOGICA DE ITAPEVI                                                                                                          | Instituto Butantan                                                                                                                                                                                                                          | Antonio Jorge Martins; Claudia Renata dos Santos Barros; David Schlesinger; Debora Botequão Moretti; Dimas Tadeu Covas; Elaine Cristina Marquize; Elaine Vieira Santos; Evandra Strazza Rodrigues; Heidge Fukumasu; Jayme Augusto de Souza-Neto; José Salvatore Leister Patané; Luiz Alcantara; Luiz Lehmann Coutinho; Maria Carolina Elias; Maurício Lacerda Nogueira; Rafael dos Santos Bezerra; Raul Machado Neto; Rejane Maria Tommasini Grotto; Ricardo Haddad; Sandra Coccuzzo Sampaio Vessoni; Simone Kashima; Svetoslav Nanev Slavov; Vincent Louis Viala                                                                                                                                |
| EPI_ISL_1502536                                                                                                                                                                                                                                                                                                                                                                                                                                                                                                                                                                                                                                                                                                                                                                                                                                                                                                                                                                                                                                                                                                                                                                                                                                                                                                                                                                                                                                                                                                                                   | VILLA NOVECENTO S.R.L LANCIANO(CHIETI)                                                                                                                        | Istituto Zooprofilattico Sperimentale dell' Abruzzo e Molise "G. Caporale"                                                                                                                                                                  | Ancora M; Calistri P; Cammà C; Caporale M; Curini V; Delli Compagni E; Di Domenico M; Di Lollo Valeria; Di Pasquale A; Lorusso A; Mangone I; Marccacci M; Puglia I; Rinaldi A; Savini G; Scialabba S                                                                                                                                                                                                                                                                                                                                                                                                                                                                                             |
| EPI_ISL_2036257                                                                                                                                                                                                                                                                                                                                                                                                                                                                                                                                                                                                                                                                                                                                                                                                                                                                                                                                                                                                                                                                                                                                                                                                                                                                                                                                                                                                                                                                                                                                   | VIROLOGY LABORATORY-CHU NICE                                                                                                                                  | VIROLOGY LABORATORY-CHU NICE                                                                                                                                                                                                                | Aicha El Yakine; Geraldine Gonfrier; Jean Machowick; Sebastien Vitale; Valerie Giordanengo; Virginie Flahou                                                                                                                                                                                                                                                                                                                                                                                                                                                                                                                                                                                      |
| EPI_ISL_3280921                                                                                                                                                                                                                                                                                                                                                                                                                                                                                                                                                                                                                                                                                                                                                                                                                                                                                                                                                                                                                                                                                                                                                                                                                                                                                                                                                                                                                                                                                                                                   | VT/Osp. Di Belcolle                                                                                                                                           | National Institute for Infectious Diseases (INM) L. Spallanzani I.R.C.C.S                                                                                                                                                                   | A Di Caro; B Bartolini; CEM Gruber; E Giombini; F Messina; F Santini; G Bonfiglio; M Ruessa; MR Capobianchi; O Butera                                                                                                                                                                                                                                                                                                                                                                                                                                                                                                                                                                            |
| EPI_ISL_413486                                                                                                                                                                                                                                                                                                                                                                                                                                                                                                                                                                                                                                                                                                                                                                                                                                                                                                                                                                                                                                                                                                                                                                                                                                                                                                                                                                                                                                                                                                                                    | Valley Medical Center                                                                                                                                         | University of Washington Virology Lab                                                                                                                                                                                                       | Alexander Greninger; Arun Nalla; Hong Xie; Keith Jerome; Pavitra Roychoudhury                                                                                                                                                                                                                                                                                                                                                                                                                                                                                                                                                                                                                    |
| EPI_ISL_1314493                                                                                                                                                                                                                                                                                                                                                                                                                                                                                                                                                                                                                                                                                                                                                                                                                                                                                                                                                                                                                                                                                                                                                                                                                                                                                                                                                                                                                                                                                                                                   | Vestfold Hospital, Toensberg Department of Microbiology                                                                                                       | Norwegian Institute of Public Health, Department of Virology                                                                                                                                                                                | Atiya R Ali; Debech Nadia; Engebretsen Serina Beate; Garcia Lorente Ignacio; Hilde Elshaug; Hilde Vollan; Jon Bråte; Kamilla Heddeland Instefjord; Karoline Bragstad; Kathrine Stene-Johansen; Marie Paulsen Madsen; Olav Hugnnes; Pedersen Benedikte Nevjen; Rasmus Riis Kopperud                                                                                                                                                                                                                                                                                                                                                                                                               |
| EPI_ISL_1578619, EPI_ISL_1578761, EPI_ISL_1579174, EPI_ISL_1579196                                                                                                                                                                                                                                                                                                                                                                                                                                                                                                                                                                                                                                                                                                                                                                                                                                                                                                                                                                                                                                                                                                                                                                                                                                                                                                                                                                                                                                                                                | Vestfold Hospital, Toensberg Department of Microbiology                                                                                                       | Norwegian Institute of Public Health, Department of Virology                                                                                                                                                                                | Atiya R Ali; Debech Nadia; Engebretsen Serina Beate; Garcia Lorente Ignacio; Hilde Elshaug; Hilde Vollan; Jon Bråte; Kamilla Heddeland Instefjord; Karoline Bragstad; Kathrine Stene-Johansen; Marie Paulsen Madsen; Olav Hugnnes; Pedersen Benedikte Nevjen; Rasmus Riis Kopperud                                                                                                                                                                                                                                                                                                                                                                                                               |
| EPI_ISL_520866, EPI_ISL_593005                                                                                                                                                                                                                                                                                                                                                                                                                                                                                                                                                                                                                                                                                                                                                                                                                                                                                                                                                                                                                                                                                                                                                                                                                                                                                                                                                                                                                                                                                                                    | Victorian Infectious Diseases Reference Laboratory (VIDRL)                                                                                                    | VIDRL and MDU-PHL                                                                                                                                                                                                                           | Caly L.; Druce J.; M. B.; Sait, M.; Schultz; Schultz M.; Seemann T.; Sherry, N.                                                                                                                                                                                                                                                                                                                                                                                                                                                                                                                                                                                                                  |
| EPI_ISL_416413, EPI_ISL_416415, EPI_ISL_416514, EPI_ISL_416515                                                                                                                                                                                                                                                                                                                                                                                                                                                                                                                                                                                                                                                                                                                                                                                                                                                                                                                                                                                                                                                                                                                                                                                                                                                                                                                                                                                                                                                                                    | Victorian Infectious Diseases Reference Laboratory (VIDRL)                                                                                                    | Victorian Infectious Diseases Reference Laboratory and Microbiological Diagnostic Unit Public Health Laboratory, Doherty Institute                                                                                                          | Caly L.; Druce J.; Schultz M.; Seemann T.; Taiaroa, G.                                                                                                                                                                                                                                                                                                                                                                                                                                                                                                                                                                                                                                           |
| EPI_ISL_1960630, EPI_ISL_2614784, EPI_ISL_2615209                                                                                                                                                                                                                                                                                                                                                                                                                                                                                                                                                                                                                                                                                                                                                                                                                                                                                                                                                                                                                                                                                                                                                                                                                                                                                                                                                                                                                                                                                                 | Viesoji istaiga Klaipedos universitetine ligonine                                                                                                             | National Public Health Surveillance Laboratory                                                                                                                                                                                              | Ana Steponkiene; Danas Baksa; Jelena Razmuk; Lukas Vasionis; Lukas Zemaitis; Migle Gabrielaite; Svajune Muralyte                                                                                                                                                                                                                                                                                                                                                                                                                                                                                                                                                                                 |
| EPI_ISL_2614989                                                                                                                                                                                                                                                                                                                                                                                                                                                                                                                                                                                                                                                                                                                                                                                                                                                                                                                                                                                                                                                                                                                                                                                                                                                                                                                                                                                                                                                                                                                                   | Viesoji istaiga Vilniaus universiteto ligonine Santaros klinikos                                                                                              | National Public Health Surveillance Laboratory                                                                                                                                                                                              | Ana Steponkiene; Danas Baksa; Jelena Razmuk; Lukas Vasionis; Lukas Zemaitis; Migle Gabrielaite; Svajune Muralyte                                                                                                                                                                                                                                                                                                                                                                                                                                                                                                                                                                                 |
| EPI_ISL_3189948                                                                                                                                                                                                                                                                                                                                                                                                                                                                                                                                                                                                                                                                                                                                                                                                                                                                                                                                                                                                                                                                                                                                                                                                                                                                                                                                                                                                                                                                                                                                   | Viesoji istaiga Vilniaus universiteto ligoninė Santaros Klinikos                                                                                              | National Public Health Surveillance Laboratory                                                                                                                                                                                              | Ana Steponkiene; Danas Baksa; Jelena Razmuk; Lukas Vasionis; Lukas Zemaitis; Migle Gabrielaite; Svajune Muralyte                                                                                                                                                                                                                                                                                                                                                                                                                                                                                                                                                                                 |
| EPI_ISL_1396405, EPI_ISL_1398377                                                                                                                                                                                                                                                                                                                                                                                                                                                                                                                                                                                                                                                                                                                                                                                                                                                                                                                                                                                                                                                                                                                                                                                                                                                                                                                                                                                                                                                                                                                  | Vilnius University Hospital Santaros Klinikos                                                                                                                 | Vilnius University Hospital Santaros Klinikos, Center of Laboratory Medicine                                                                                                                                                                | Daniel Naumovas; Dovile Ezerkyte; Gytis Dudas; Ingrida Olendraitė; Laimonas Griskevičius; Ligita Raugaite; Mindaugas Stoskus; Monika Katenaite; Rimvydas Norvilas                                                                                                                                                                                                                                                                                                                                                                                                                                                                                                                                |
| EPI_ISL_1654085, EPI_ISL_1657758, EPI_ISL_1657933, EPI_ISL_1657952, EPI_ISL_1658053, EPI_ISL_1658080, EPI_ISL_1658132, EPI_ISL_1658373, EPI_ISL_1658970, EPI_ISL_1913508                                                                                                                                                                                                                                                                                                                                                                                                                                                                                                                                                                                                                                                                                                                                                                                                                                                                                                                                                                                                                                                                                                                                                                                                                                                                                                                                                                          | see above                                                                                                                                                     | Department of Biosystems Science and Engineering, ETH Zurich                                                                                                                                                                                | Andrea Patrignani; Andrea Cabral de Gouvea; Catharine Aquino; Chaoran Chen; Christian Beisel; Christiane Beckmann; Christoph Noppen; David Dreifuss; Doris Popovic; Elodie Burcklen; Griffin White; Ina Nissen; Ivan Topolsky; Jay Tracy; Katharina Jahn; Lara Fuhrmann; Laura Neff; Lennart Opitz; Maria Domenica Moccia; Maurice Redondo; Mirjam Feldkamp; Natascia Santacroce; Niko Beerenwinkel; Noemie Santamaría de Souza; Olivier Kobel; Philipp Jablonski; Ralph Schlapbach; Rebecca Denes; Sarah Nadeau; Simon Gruter; Sophie Seidel; Tanja Stadler; Timothy Sykes                                                                                                                      |
| EPI_ISL_899988, EPI_ISL_1002959, EPI_ISL_1004457, EPI_ISL_1119643, EPI_ISL_1259880, EPI_ISL_1259955, EPI_ISL_1260049, EPI_ISL_1360861, EPI_ISL_1360908, EPI_ISL_1360934, EPI_ISL_1361148, EPI_ISL_1361443, EPI_ISL_1361473, EPI_ISL_1407857, EPI_ISL_1408153, EPI_ISL_1496165, EPI_ISL_1496326, EPI_ISL_1496476, EPI_ISL_1598455, EPI_ISL_1599091, EPI_ISL_1682283, EPI_ISL_1682623, EPI_ISL_1682733, EPI_ISL_1682753, EPI_ISL_1750015, EPI_ISL_1750072, EPI_ISL_1750470, EPI_ISL_1750481, EPI_ISL_1750491, EPI_ISL_1750796, EPI_ISL_2017137                                                                                                                                                                                                                                                                                                                                                                                                                                                                                                                                                                                                                                                                                                                                                                                                                                                                                                                                                                                                      | see above                                                                                                                                                     | Department of Biosystems Science and Engineering, ETH Zurich                                                                                                                                                                                | Andrea Patrignani; Andrea Cabral de Gouvea; Catharine Aquino; Chaoran Chen; Christian Beisel; Christiane Beckmann; Christoph Noppen; David Dreifuss; Deborah Penet; Doris Popovic; Elodie Burcklen; Emmanouil Dermatzakis; Griffin White; Henri Pegeot; Ina Nissen; Ioannis Xenarios; Ivan Topolsky; Jay Tracy; Katharina Jahn; Keith Harshman; Lara Fuhrmann; Laura Neff; Lennart Opitz; Lorenzo Cenutti; Maria Domenica Moccia; Maurice Redondo; Mirjam Feldkamp; Natascia Santacroce; Niko Beerenwinkel; Noemie Santamaría de Souza; Olivier Kobel; Philipp Jablonski; Ralph Schlapbach; Rebecca Denes; Sarah Nadeau; Simon Gruter; Sophie Seidel; Tanja Stadler; Timothy Sykes; Tobias Schär |
| EPI_ISL_1388423                                                                                                                                                                                                                                                                                                                                                                                                                                                                                                                                                                                                                                                                                                                                                                                                                                                                                                                                                                                                                                                                                                                                                                                                                                                                                                                                                                                                                                                                                                                                   | Viollier AG                                                                                                                                                   | University Hospital Basel, Clinical Bacteriology                                                                                                                                                                                            | Adrian Egli; Alfredo Mari; Hans Hirsch; Helena MB Seth-Smith; Julia Bielecki; Karoline Leuzinger; Lukas Fenner; Madlen Stange; Manuel Battegay; Tim Roloff                                                                                                                                                                                                                                                                                                                                                                                                                                                                                                                                       |
| EPI_ISL_1821730                                                                                                                                                                                                                                                                                                                                                                                                                                                                                                                                                                                                                                                                                                                                                                                                                                                                                                                                                                                                                                                                                                                                                                                                                                                                                                                                                                                                                                                                                                                                   | Viollier AG                                                                                                                                                   | Viollier AG                                                                                                                                                                                                                                 | Andrea Patrizia Salzmann; Christiane Beckmann; Christoph Noppen; Henriette Kurth; Maurice Redondo; Olivier Kobel                                                                                                                                                                                                                                                                                                                                                                                                                                                                                                                                                                                 |
| EPI_ISL_417433, EPI_ISL_417434, EPI_ISL_417435, EPI_ISL_417436, EPI_ISL_417437, EPI_ISL_417437, EPI_ISL_417441, EPI_ISL_417442, EPI_ISL_417942, EPI_ISL_417944, EPI_ISL_417947, EPI_ISL_417948, EPI_ISL_417950, EPI_ISL_2968718                                                                                                                                                                                                                                                                                                                                                                                                                                                                                                                                                                                                                                                                                                                                                                                                                                                                                                                                                                                                                                                                                                                                                                                                                                                                                                                   | see above                                                                                                                                                     | Pathogen Sequencing Lab, National Institute for Biomedical Research (INRB)                                                                                                                                                                  | Allison Black; Amuri Aziza; Andrew Rambaut; Catherine Pratt; Eddy Kinganda-Lusamaki; Edith Nkwembe; Emmanuel Lokio Lofiko; Francisca Muyembe Mawete; Ian Goodfellow; James Hadfield; Jean Claude Makanga; Jean-Jacques Muyembe Tatumfi; Josh Quick; Kristian Andersen; Matthias Pauthner; Michael Wiley; Nick Loman; Placide Mbala-Kingebeni; Steve Ahuka-Mundeke; Trevor Bedford                                                                                                                                                                                                                                                                                                                |
| EPI_ISL_418956, EPI_ISL_418957                                                                                                                                                                                                                                                                                                                                                                                                                                                                                                                                                                                                                                                                                                                                                                                                                                                                                                                                                                                                                                                                                                                                                                                                                                                                                                                                                                                                                                                                                                                    | Virginia DCLS                                                                                                                                                 | Virginia DCLS                                                                                                                                                                                                                               | Virginia DCLS                                                                                                                                                                                                                                                                                                                                                                                                                                                                                                                                                                                                                                                                                    |
| EPI_ISL_1445021, EPI_ISL_1760343, EPI_ISL_1805554, EPI_ISL_1822104, EPI_ISL_2101990, EPI_ISL_3214916, EPI_ISL_3214966                                                                                                                                                                                                                                                                                                                                                                                                                                                                                                                                                                                                                                                                                                                                                                                                                                                                                                                                                                                                                                                                                                                                                                                                                                                                                                                                                                                                                             | see above                                                                                                                                                     | Virginia Division of Consolidated Laboratory Services                                                                                                                                                                                       | Virginia DCLS; Virginia Division of Consolidated Laboratory Services                                                                                                                                                                                                                                                                                                                                                                                                                                                                                                                                                                                                                             |
| EPI_ISL_416488                                                                                                                                                                                                                                                                                                                                                                                                                                                                                                                                                                                                                                                                                                                                                                                                                                                                                                                                                                                                                                                                                                                                                                                                                                                                                                                                                                                                                                                                                                                                    | ViroGenetics - BSL3 Laboratory of Virology; Human Genome Variation Research Group & Genomics Centre MCB; Bioinformatics Research Group Department of Virology | ViroGenetics - BSL3 Laboratory of Virology; Human Genome Variation Research Group & Genomics Centre MCB; Bioinformatics Research Group Department of Virology                                                                               | Adrianna Klajmon; Agata Jarosz; Agnieszka Kolakowska-Kulesza; Aleksandra Milewska; Ewelina Hallman-Szelinska; Ewelina Pośpiech; Kamila Marszałek; Katarzyna Pancer; Katarzyna Zacharczuk; Krzysztof Pyrc; Magdalena Rzeczowska; Natalia Wolaniuk; Paweł P Labaj; Tomasz Wolkowicz; Wojciech Branicki                                                                                                                                                                                                                                                                                                                                                                                             |
| EPI_ISL_418183                                                                                                                                                                                                                                                                                                                                                                                                                                                                                                                                                                                                                                                                                                                                                                                                                                                                                                                                                                                                                                                                                                                                                                                                                                                                                                                                                                                                                                                                                                                                    | Virological Research Group, Szentágotthai Research Centre                                                                                                     | Bioinformatics Research Group, Szentágotthai Research Centre                                                                                                                                                                                | Attila Gyenesei; Endre Gábor Tóth; Ferenc Jakab; Gábor Kemenesi; Péter Urbán; Róbert Herczeg                                                                                                                                                                                                                                                                                                                                                                                                                                                                                                                                                                                                     |
| EPI_ISL_416426                                                                                                                                                                                                                                                                                                                                                                                                                                                                                                                                                                                                                                                                                                                                                                                                                                                                                                                                                                                                                                                                                                                                                                                                                                                                                                                                                                                                                                                                                                                                    | Virological Research Group, Szentágotthai Research Centre, University of Pécs                                                                                 | Bioinformatics Research Group, Szentágotthai Research Centre, University of Pécs                                                                                                                                                            | Attila Gyenesei; Endre Gábor Tóth; Ferenc Jakab; Gábor Kemenesi; Péter Urbán; Róbert Herczeg                                                                                                                                                                                                                                                                                                                                                                                                                                                                                                                                                                                                     |
| EPI_ISL_2694587                                                                                                                                                                                                                                                                                                                                                                                                                                                                                                                                                                                                                                                                                                                                                                                                                                                                                                                                                                                                                                                                                                                                                                                                                                                                                                                                                                                                                                                                                                                                   | Virology Centre, School of public health, Tehran University of Medical Sciences, Tehran, Iran                                                                 | Genetics Research Center, University of Social Welfare and Rehabilitation Sciences                                                                                                                                                          | Hossein Najmabadi.; Jila Yavarian; Khadijeh JalaVand; Kimia Kahrizi; Marzieh Mohseni; Talat Mokhtari-Azad; Zohreh Fattahi                                                                                                                                                                                                                                                                                                                                                                                                                                                                                                                                                                        |
| EPI_ISL_1545906, Virology Department, Royal Infirmary of Edinburgh, NHS Lothian / School of Biological Sciences,                                                                                                                                                                                                                                                                                                                                                                                                                                                                                                                                                                                                                                                                                                                                                                                                                                                                                                                                                                                                                                                                                                                                                                                                                                                                                                                                                                                                                                  | COVID-19 Genomics UK (COG-                                                                                                                                    | Colquhoun R; Cotton S; Dewar R; Fernandez G; Gallagher A; Hill V; Jackson B; Maloney D; McCrone JT; McHugh M; O'Toole A.; Rambaut A; Rooke S; Scher E; Templeton K; Yu X                                                                    |                                                                                                                                                                                                                                                                                                                                                                                                                                                                                                                                                                                                                                                                                                  |

|                                                                                                                                                                                                                                                                                                                                                                                                                                                                                                                                                                                                                                                                                                                                                                            |                                                                                                                                                                                                 |                                                                                                                                                                                                                                                  |                                                                                                                                                                                                                                                                                                                                                                                                                                                  |
|----------------------------------------------------------------------------------------------------------------------------------------------------------------------------------------------------------------------------------------------------------------------------------------------------------------------------------------------------------------------------------------------------------------------------------------------------------------------------------------------------------------------------------------------------------------------------------------------------------------------------------------------------------------------------------------------------------------------------------------------------------------------------|-------------------------------------------------------------------------------------------------------------------------------------------------------------------------------------------------|--------------------------------------------------------------------------------------------------------------------------------------------------------------------------------------------------------------------------------------------------|--------------------------------------------------------------------------------------------------------------------------------------------------------------------------------------------------------------------------------------------------------------------------------------------------------------------------------------------------------------------------------------------------------------------------------------------------|
| EPI_ISL_2125644,<br>EPI_ISL_3287751,<br>EPI_ISL_3287772                                                                                                                                                                                                                                                                                                                                                                                                                                                                                                                                                                                                                                                                                                                    | University of Edinburgh                                                                                                                                                                         | UK) Consortium                                                                                                                                                                                                                                   |                                                                                                                                                                                                                                                                                                                                                                                                                                                  |
| EPI_ISL_488961                                                                                                                                                                                                                                                                                                                                                                                                                                                                                                                                                                                                                                                                                                                                                             | Virology Department, Royal Infirmary of Edinburgh, NHS Lothian / School of Biological Sciences, University of Edinburgh                                                                         | Wellcome Sanger Institute for the COVID-19 Genomics UK (COG-UK) consortium                                                                                                                                                                       | Colquhoun R; Cordelia Langford; David K. Jackson; Dewar R; Dominic Kwiatkowski; Ewan Harrison; Hill V; Ian Johnston; Jackson B; John Sillitoe on behalf of the Wellcome Sanger Institute COVID-19 Surveillance Team ( <a href="http://www.sanger.ac.uk/covid-team/">http://www.sanger.ac.uk/covid-team/</a> ); McCrone JT; McHugh M; O'Toole A; Rambaut A; Roberto Amato; Rooke S; Scher E; Sonia Goncalves; Templeton K and Alex Alderton; Yu X |
| EPI_ISL_432881                                                                                                                                                                                                                                                                                                                                                                                                                                                                                                                                                                                                                                                                                                                                                             | Virology Department, Royal Infirmary of Edinburgh, NHS Lothian / School of Biological Sciences, University of Edinburgh / Institute of Genetics and Molecular Medicine, University of Edinburgh | COVID-19 Genomics UK (COG-UK) Consortium                                                                                                                                                                                                         | Balcaza C; Colquhoun R; Dewar R; Gallagher M; Hill V; Jackson B; McCrone JT; McHugh M; O'Toole A; Rambaut A; Rooke S; Templeton K; Williams TC; Yu X                                                                                                                                                                                                                                                                                             |
| EPI_ISL_414500                                                                                                                                                                                                                                                                                                                                                                                                                                                                                                                                                                                                                                                                                                                                                             | Virology Department, Sheffield Teaching Hospitals NHS Foundation Trust                                                                                                                          | Department of Infection, Immunity and Cardiovascular Disease, The Florey Institute, The Medical School, University of Sheffield                                                                                                                  | Cariad Evans; Matthew Parker; Matthew Wyles; Mehmet Yavuz; Mohammad Raza; Thushan de Silva                                                                                                                                                                                                                                                                                                                                                       |
| EPI_ISL_416731, EPI_ISL_416733, EPI_ISL_416735, EPI_ISL_416736, EPI_ISL_416737, EPI_ISL_418286, EPI_ISL_418288, EPI_ISL_418295, EPI_ISL_418296, EPI_ISL_418297, EPI_ISL_418300, EPI_ISL_418301, EPI_ISL_418302, EPI_ISL_418303, EPI_ISL_418306, EPI_ISL_418308, EPI_ISL_418310, EPI_ISL_418311, EPI_ISL_418313, EPI_ISL_418314, EPI_ISL_418315, EPI_ISL_418316, EPI_ISL_418318, EPI_ISL_418321                                                                                                                                                                                                                                                                                                                                                                             | see above                                                                                                                                                                                       | Virology Department, Sheffield Teaching Hospitals NHS Foundation Trust                                                                                                                                                                           | Department of Infection, Immunity and Cardiovascular Disease, The Florey Institute, The Medical School, University of Sheffield                                                                                                                                                                                                                                                                                                                  |
| EPI_ISL_484449, EPI_ISL_868596, EPI_ISL_1000745, EPI_ISL_1250286                                                                                                                                                                                                                                                                                                                                                                                                                                                                                                                                                                                                                                                                                                           | Virology Department, Sheffield Teaching Hospitals NHS Foundation Trust/Department of Infection, Immunity and Cardiovascular Disease, The Medical School, University of Sheffield                | COVID-19 Genomics UK (COG-UK) Consortium                                                                                                                                                                                                         | Adri Angyal; Alex Keeley; Benjamin Lindsey; Cariad Evans; Danielle Groves; Dave Partridge; Matthew Parker; Matthew Wyles; Mehmet Yavuz; Mohammad Raza; Paul Parsons; Rachel Tucker; Rebecca Brown; Thushan de Silva                                                                                                                                                                                                                              |
| EPI_ISL_1827646                                                                                                                                                                                                                                                                                                                                                                                                                                                                                                                                                                                                                                                                                                                                                            | Virology Department, Victoria Hospital, Plaine-Wilhems, Mauritius                                                                                                                               | National Institute for Communicable Diseases of the National Health Laboratory Service                                                                                                                                                           | Allam M; Amoako DG; Baboo SB; Bhiman JN; Ismail A; Mahlangu B; Manraj SS; Mohale T; Ntuli N; Ramuth M; Sonoo J                                                                                                                                                                                                                                                                                                                                   |
| EPI_ISL_1855038                                                                                                                                                                                                                                                                                                                                                                                                                                                                                                                                                                                                                                                                                                                                                            | Virology Laboratory, Scientific Department, Army Medical Center                                                                                                                                 | Virology Laboratory, Scientific Department, Army Medical Center                                                                                                                                                                                  | Anella Monte; Anna Anselmo; Antonella Fortunato; Filippo Molinari; Florigio Lista; Francesco Giordani; Giancarlo Petralito; Giandomenico Cerreto; Riccardo De Sanctis; Silvia Fillo; Vanessa Vera Fain                                                                                                                                                                                                                                           |
| EPI_ISL_3275250                                                                                                                                                                                                                                                                                                                                                                                                                                                                                                                                                                                                                                                                                                                                                            | Virology Unit, AOUP                                                                                                                                                                             | Fondazione Pisana per la Scienza ONLUS                                                                                                                                                                                                           | Alfredo Rosellini; Annalisa Capria; Chiara Mazzanti; Francesca Lessi; Mauro Pistello; Paola Mazzetti; Paolo Aretini; Pietro Giorgio Spezia; Sara Franceschi                                                                                                                                                                                                                                                                                      |
| EPI_ISL_1711987, EPI_ISL_2801908, EPI_ISL_3031507, EPI_ISL_3031531, EPI_ISL_3031538, EPI_ISL_3188243, EPI_ISL_3570959, EPI_ISL_3983649, EPI_ISL_4071840, EPI_ISL_4259907, EPI_ISL_4503210, EPI_ISL_4503228, EPI_ISL_5260507, EPI_ISL_5260546, EPI_ISL_5260552, EPI_ISL_5451398, EPI_ISL_5802986, EPI_ISL_6227828, EPI_ISL_6227844, EPI_ISL_7141371, EPI_ISL_7370860, EPI_ISL_7370862, EPI_ISL_7370869, EPI_ISL_7370871, EPI_ISL_7370872, EPI_ISL_7370873, EPI_ISL_7370879, EPI_ISL_7370881, EPI_ISL_7370883, EPI_ISL_7370884, EPI_ISL_7370885, EPI_ISL_7370887, EPI_ISL_7370889, EPI_ISL_7370891, EPI_ISL_7370892, EPI_ISL_7370893, EPI_ISL_7370904, EPI_ISL_7370905, EPI_ISL_7370906, EPI_ISL_7370907, EPI_ISL_7370908, EPI_ISL_7370912, EPI_ISL_7370913, EPI_ISL_7370914 | see above                                                                                                                                                                                       | Virology Unit, Institut Pasteur du Cambodge                                                                                                                                                                                                      |                                                                                                                                                                                                                                                                                                                                                                                                                                                  |
| EPI_ISL_411902                                                                                                                                                                                                                                                                                                                                                                                                                                                                                                                                                                                                                                                                                                                                                             | Virology Unit, Institut Pasteur du Cambodge.                                                                                                                                                    | Virology Unit, Institut Pasteur du Cambodge (Sequencing done by: Jessica E Manning/Jennifer A Bohl at Malaria and Vector Research Laboratory, National Institute of Allergy and Infectious Diseases and Vida Ahyong from Chan-Zuckerberg Biohub) | Cecile Troupin; Chau Darapheak; Chin Savuth; Erik A Karlsson; Jurre Y Siegers; Kraing Sidonn; Leakhena Pum; Ly Sovann; Sophoannedh Rath; Teypuita Ou; Veasna Duong; Yi Sengdoern                                                                                                                                                                                                                                                                 |
| EPI_ISL_1129218                                                                                                                                                                                                                                                                                                                                                                                                                                                                                                                                                                                                                                                                                                                                                            | Virus Research and Diagnostic Laboratory, Medical College Level, Kasturba Hospital for Infectious Diseases                                                                                      | National Institute of Virology- Microbial Containment Complex, Indian Council of Medical Research                                                                                                                                                | Jayanti Shastri; Pragya D. Yadav                                                                                                                                                                                                                                                                                                                                                                                                                 |
| EPI_ISL_3207499                                                                                                                                                                                                                                                                                                                                                                                                                                                                                                                                                                                                                                                                                                                                                            | Vredenda Central Clinic wc VDC                                                                                                                                                                  | NHLS/UCT                                                                                                                                                                                                                                         | Arash Iranzadeh; Bruna Galvao; Carolyn Williamson; Deelan Doolabh; Diana Hardie; Gert Marais; Innocent Mudau; Lynn Tyers; Marvin Hsiao; Rageema Joseph; Sisonke; Stephen Korsman                                                                                                                                                                                                                                                                 |
| EPI_ISL_1446700, EPI_ISL_1823815                                                                                                                                                                                                                                                                                                                                                                                                                                                                                                                                                                                                                                                                                                                                           | WA State Department of Health                                                                                                                                                                   | Centers for Disease Control and Prevention Division of Viral Diseases, Pathogen Discovery                                                                                                                                                        | Alison Laufer Halpin; Ben L. Rambo-Martin; Clinton R. Paden; Dakota Howard; Darlene Wagner; Dave Wentworth; Dhvani Batra; Jasmine Padilla; Justin Lee; Katie Dillon; Krista Queen; Kristen Knipe; Kristine Lacek; Mark Burroughs; Matthew Scherer; Mili Sheth; Peter Cook; Sam Shepard; Sarah Nobles; Shoshona Le; Suxiang Tong; Vivien Dugan; Yvette Unoarumhi                                                                                  |
| EPI_ISL_418772, EPI_ISL_418773, EPI_ISL_418774, EPI_ISL_426450                                                                                                                                                                                                                                                                                                                                                                                                                                                                                                                                                                                                                                                                                                             | WA State Department of Health                                                                                                                                                                   | Pathogen Discovery, Respiratory Viruses Branch, Division of Viral Diseases, Centers for Disease Control and Prevention                                                                                                                           | Anna Uehara; Brian Hiatt; Clinton R. Paden; Denny Russell; Haibin Wang; Jesica Jacobs; Jessica Gant; Jing Zhang; Krista Queen; Suxiang Tong; Yan Li; Ying Tao                                                                                                                                                                                                                                                                                    |
| EPI_ISL_1228378                                                                                                                                                                                                                                                                                                                                                                                                                                                                                                                                                                                                                                                                                                                                                            | WESTCHESTER MEDICAL CENTER                                                                                                                                                                      | Wadsworth Center, New York State Department of Health                                                                                                                                                                                            | Alexis Russel; Daryl M. Lamson; Erasmus Schneider; Erica Lasek-Nesselquist; John Kelly; Jonathan Plitnick; Kirsten St. George; Matthew Shudt; Melissa A Leisner; Navjot Singh                                                                                                                                                                                                                                                                    |
| EPI_ISL_1273786                                                                                                                                                                                                                                                                                                                                                                                                                                                                                                                                                                                                                                                                                                                                                            | WSSE Gdańsk                                                                                                                                                                                     | 1. National Institute of Public Health - National Institute of Hygiene; 2. Eurofins Genomics Europe Sequencing GmbH                                                                                                                              | ECDC COVID-19 WGS support team; Eurofins Genomics Europe Sequencing Team; Gierczyński Rafał; Sadkowska-Todys Malgorzata; Wolkowicz Tomasz; Zacharczuk Katarzyna                                                                                                                                                                                                                                                                                  |
| EPI_ISL_1745044, EPI_ISL_2131186, EPI_ISL_2131213                                                                                                                                                                                                                                                                                                                                                                                                                                                                                                                                                                                                                                                                                                                          | WSSE w Gdańsku                                                                                                                                                                                  | 1. National Institute of Public Health - National Institute of Hygiene, Warsaw, Poland 2. Biobank Lab, University of Lodz 3. Laboratory of Respiratory Viruses, Teaching and Clinical Center of the Medical University of Lodz                   | Dominik Strapagiel; Izabela Drózd; Jakub Lach; Katarzyna Zacharczuk; Klaudyna Królikowska; Maciej Borowiec; Magdalena Nowakowska; Magdalena Traczyk-Borszyńska; Marcin Słomka; Marta Sobalska-Kwapis; Malgorzata Sadkowska-Todys; Tomasz Ploszaj; Tomasz Wolkowicz                                                                                                                                                                               |
| EPI_ISL_1746687                                                                                                                                                                                                                                                                                                                                                                                                                                                                                                                                                                                                                                                                                                                                                            | WSSE w Warszawie                                                                                                                                                                                | 1. National Institute of Public Health - National Institute of Hygiene; 2. Eurofins Genomics Europe Sequencing GmbH                                                                                                                              | ECDC COVID-19 WGS support team; Eurofins Genomics Europe Sequencing Team; Gierczyński Rafał; Sadkowska-Todys Malgorzata; Wolkowicz Tomasz; Zacharczuk Katarzyna                                                                                                                                                                                                                                                                                  |
| EPI_ISL_2615507                                                                                                                                                                                                                                                                                                                                                                                                                                                                                                                                                                                                                                                                                                                                                            | WV Labs                                                                                                                                                                                         | WVU and Marshall University Combined Genomics Core Facilities                                                                                                                                                                                    | James Denvir; Peter Perrotta; Peter Stoilov; Ryan Percifield; Wesley Kimble                                                                                                                                                                                                                                                                                                                                                                      |
| EPI_ISL_1897281                                                                                                                                                                                                                                                                                                                                                                                                                                                                                                                                                                                                                                                                                                                                                            | WVT Laboratory, Corvallis, Oregon                                                                                                                                                               | OSU Center for Genome Research and Biocomputing                                                                                                                                                                                                  | Oregon State University TRACE Project                                                                                                                                                                                                                                                                                                                                                                                                            |
| EPI_ISL_1205288                                                                                                                                                                                                                                                                                                                                                                                                                                                                                                                                                                                                                                                                                                                                                            | WVU Rapid Development Laboratory                                                                                                                                                                | WVU and Marshall University Combined Genomics Core Facilities                                                                                                                                                                                    | James Denvir; Peter Perrotta; Peter Stoilov; Ryan Percifield; Wesley Kimble                                                                                                                                                                                                                                                                                                                                                                      |
| EPI_ISL_1824025, EPI_ISL_2787403                                                                                                                                                                                                                                                                                                                                                                                                                                                                                                                                                                                                                                                                                                                                           | WY Public Health Laboratory                                                                                                                                                                     | Centers for Disease Control and Prevention Division of Viral Diseases, Pathogen Discovery                                                                                                                                                        | Alison Laufer Halpin; Ben L. Rambo-Martin; Clinton R. Paden; Dakota Howard; Darlene Wagner; Dave Wentworth; Dhvani Batra; Jasmine Padilla; Justin Lee; Katie Dillon; Krista Queen; Kristen Knipe; Kristine Lacek; Mark Burroughs; Matthew Scherer; Mili Sheth; Peter Cook; Sam Shepard; Sarah Nobles; Shoshona Le; Suxiang Tong; Vivien Dugan; Yvette Unoarumhi                                                                                  |
| EPI_ISL_754473                                                                                                                                                                                                                                                                                                                                                                                                                                                                                                                                                                                                                                                                                                                                                             | Wadsworth Center, New York State Department.of Health                                                                                                                                           | Wadsworth Center, New York State Department.of Health                                                                                                                                                                                            | Alexis Russel; Daryl M. Lamson; Erasmus Schneider; Erica Lasek-Nesselquist; John Kelly; Jonathan Plitnick; Kirsten St. George; Matthew Shudt; Melissa A Leisner; Navjot Singh; Sara Griesemer                                                                                                                                                                                                                                                    |
| EPI_ISL_415041, EPI_ISL_415655, EPI_ISL_415657, EPI_ISL_415659, EPI_ISL_416024, EPI_ISL_416026, EPI_ISL_418103, EPI_ISL_418110, EPI_ISL_418117, EPI_ISL_418120, EPI_ISL_418122, EPI_ISL_418136, EPI_ISL_418139, EPI_ISL_418140, EPI_ISL_418144, EPI_ISL_418145, EPI_ISL_418150, EPI_ISL_418158, EPI_ISL_418159, EPI_ISL_418163                                                                                                                                                                                                                                                                                                                                                                                                                                             | see above                                                                                                                                                                                       | Wales Specialist Virology Centre                                                                                                                                                                                                                 | Public Health Wales Microbiology Cardiff                                                                                                                                                                                                                                                                                                                                                                                                         |
| EPI_ISL_628118, EPI_ISL_639051, EPI_ISL_726410, EPI_ISL_742763, EPI_ISL_742768                                                                                                                                                                                                                                                                                                                                                                                                                                                                                                                                                                                                                                                                                             | Wales Specialist Virology Centre Sequencing lab: Pathogen Genomics Unit                                                                                                                         | COVID-19 Genomics UK (COG-UK) Consortium                                                                                                                                                                                                         | Alec Birchley; Alexander Adams; Amy Gaskin; Angela Marchbank; Bree Gatica-Wilcox; Catherine Moore; Jason Coombes; Joanne Watkins; Joel Southgate; Johnathan Evans; Laura Gifford; Lauren Gilbert; Lee Graham; Malorie Perry; Matthew Bull; Nicole Pacchiarini; Sally Corden; Sara Kumziene-Summerhayes; Sara Rey; Sarah Taylor; Simon Cottrell; Sophie Jones; Tom Connor                                                                         |
| EPI_ISL_841170, EPI_ISL_1637616, EPI_ISL_1637787, EPI_ISL_1637922, EPI_ISL_3180652, EPI_ISL_3180659, EPI_ISL_3180695, EPI_ISL_3180725, EPI_ISL_3180757, EPI_ISL_3180784, EPI_ISL_3180808, EPI_ISL_3180809, EPI_ISL_3180881, EPI_ISL_3180911, EPI_ISL_3180979, EPI_ISL_3181023, EPI_ISL_3181329, EPI_ISL_3181415, EPI_ISL_3181426, EPI_ISL_3181440, EPI_ISL_3182020, EPI_ISL_3182116,                                                                                                                                                                                                                                                                                                                                                                                       |                                                                                                                                                                                                 |                                                                                                                                                                                                                                                  |                                                                                                                                                                                                                                                                                                                                                                                                                                                  |

|                                                                                                                                                                                                                                                                                                                                                                                                                                                                                                             |                                                                                                                                                                                                                                                                                 |                                                                                                                                                                                                                                                                                                                            |                                                                                                                                                                                                                                                                                                                                                                                                                                                                                                                                                                                                                                                                                                                                                                                                                                                                                                                                                                                                                                                                                                                                                                                |
|-------------------------------------------------------------------------------------------------------------------------------------------------------------------------------------------------------------------------------------------------------------------------------------------------------------------------------------------------------------------------------------------------------------------------------------------------------------------------------------------------------------|---------------------------------------------------------------------------------------------------------------------------------------------------------------------------------------------------------------------------------------------------------------------------------|----------------------------------------------------------------------------------------------------------------------------------------------------------------------------------------------------------------------------------------------------------------------------------------------------------------------------|--------------------------------------------------------------------------------------------------------------------------------------------------------------------------------------------------------------------------------------------------------------------------------------------------------------------------------------------------------------------------------------------------------------------------------------------------------------------------------------------------------------------------------------------------------------------------------------------------------------------------------------------------------------------------------------------------------------------------------------------------------------------------------------------------------------------------------------------------------------------------------------------------------------------------------------------------------------------------------------------------------------------------------------------------------------------------------------------------------------------------------------------------------------------------------|
| EPI_ISL_3182170, EPI_ISL_3182379, EPI_ISL_3182414, EPI_ISL_3182425, EPI_ISL_3182430, EPI_ISL_3182454, EPI_ISL_3182475, EPI_ISL_3182476, EPI_ISL_3182556, EPI_ISL_3182557<br>see above                                                                                                                                                                                                                                                                                                                       | Wales Specialist Virology Centre Sequencing lab: Pathogen Genomics Unit                                                                                                                                                                                                         | Public Health Wales Microbiology Cardiff Wales Specialist Virology Centre                                                                                                                                                                                                                                                  | Alec Birchley; Alexander Adams; Amy Gaskin; Angela Marchbank; Bree Gatica-Wilcox; Catherine Moore; Jason Coombes; Joanne Watkins; Joel Southgate; Johnathan Evans; Laura Gifford; Lauren Gilbert; Lee Graham; Malorie Perry; Matthew Bull; Nicole Pacchiarini; Sally Corden; Sara Kumziene-Summerhayes; Sara Rey; Sarah Taylor; Simon Cottrell; Sophie Jones; Tom Connor                                                                                                                                                                                                                                                                                                                                                                                                                                                                                                                                                                                                                                                                                                                                                                                                       |
| EPI_ISL_412970, EPI_ISL_417071, EPI_ISL_417075, EPI_ISL_417076, EPI_ISL_417081, EPI_ISL_417087, EPI_ISL_417088, EPI_ISL_417090, EPI_ISL_417095, EPI_ISL_417107, EPI_ISL_417115, EPI_ISL_417120, EPI_ISL_417123, EPI_ISL_417129, EPI_ISL_417130, EPI_ISL_417133, EPI_ISL_417134, EPI_ISL_417136, EPI_ISL_417142, EPI_ISL_417143, EPI_ISL_417147, EPI_ISL_417159, EPI_ISL_417166, EPI_ISL_417167, EPI_ISL_417168, EPI_ISL_430271, EPI_ISL_495794, EPI_ISL_497083, EPI_ISL_497683, EPI_ISL_806940<br>see above | Washington State Department of Health                                                                                                                                                                                                                                           | Seattle Flu Study                                                                                                                                                                                                                                                                                                          | Amanda Adler; Barry Lutz; Barry R. Lutz; Benjamin Pelle; Brian Hiatt; Caitlin R. Wolf; Chris D. Frazier; Chu et al; Chu et al; Deborah A. Nickerson; Deborah Nickerson; Elisabeth Brandstetter; Geoff; Geoff Melly; Helen Chu; Helen Y. Chu; Janet A. Englund; Janet Englund; Jay Shendure; Jover Lee; Kairsten Fay; Kirsten Lacombe; Lea M. Starita; Lea Starita; Mark J. Rieder; Mark Rieder; Matthew Richardson; Matthew Thompson; Melissa Truong; Michael Boeckh; Michael Klumare; Misja Ilicisin; Peter D. Han; Philip Dykema; Ramesh Gautam; Scott Lindquist; Thomas R. Sibley; Trevor Bedford; and Trevor Bedford                                                                                                                                                                                                                                                                                                                                                                                                                                                                                                                                                       |
| EPI_ISL_1263337, EPI_ISL_1653885, EPI_ISL_3216968, EPI_ISL_3217015<br>EPI_ISL_413457, EPI_ISL_413458<br>EPI_ISL_413455                                                                                                                                                                                                                                                                                                                                                                                      | Washington State Department of Health Public Health Laboratories<br><br>Washington State Public Health Lab<br><br>Washington State Public Health Lab                                                                                                                            | Washington State Department of Health Public Health Laboratories<br><br>UW Virology Lab<br><br>University of Washington Virology Lab                                                                                                                                                                                       | Avi Singh; Darren Lucas; Denny Russell; Drew MacKellar; Geoff Melly; Hannah Gray; Joenice Gonzalez; JohnAric Peterson; Philip Dykema; Rebecca Cao; Vanessa De Los Santos<br><br>Alexander Greninger; Arun Nalla; Hong Xie; Keith Jerome; Pavitra Roychoudhury<br><br>Alexander Greninger; Arun Nalla; Hong Xie; Keith Jerome; Pavitra Roychoudhury                                                                                                                                                                                                                                                                                                                                                                                                                                                                                                                                                                                                                                                                                                                                                                                                                             |
| EPI_ISL_3246631, EPI_ISL_3246641, EPI_ISL_3246664, EPI_ISL_6567308, EPI_ISL_416539                                                                                                                                                                                                                                                                                                                                                                                                                          | Weill Cornell Medicine<br><br>Wellington Hospital                                                                                                                                                                                                                               | New York Genome Center<br><br>Institute of Environmental Science and Research (ESR)                                                                                                                                                                                                                                        | Amy Baldwin; Andre Corvelo; Arryn Craney; Chris Mason; Dayna M. Oschwald; Hanna Rennett; Lars F Westblade; Margaret Elizabeth Ross; Melissa Cushing; Michael Zody; Olivier Elemento; Priya Velu; Samantha Fennessey; Tom Maniatis<br><br>Craig Thornley; Erasmus Smit; Joep de Ligt; Lauren Jelly; Matt Storey; Maxim Bloomfield; Xiaoyun Ren                                                                                                                                                                                                                                                                                                                                                                                                                                                                                                                                                                                                                                                                                                                                                                                                                                  |
| EPI_ISL_1255154                                                                                                                                                                                                                                                                                                                                                                                                                                                                                             | West African Centre for Cell Biology of Infectious Pathogens (WACCBIP), University of Ghana, Accra, Ghana                                                                                                                                                                       | West African Centre for Cell Biology of Infectious Pathogens (WACCBIP), University of Ghana, Volta Road, Legon-Accra, Ghana                                                                                                                                                                                                | ; Abdoulaye B Diallo; Abdul-Karim Abass; Aisha Mohammed; Benjamin Demah Nueretty; Collins M. Morang'a; Dam Kenneth Mibut; Dominic S.Y. Amuzu; Emmanuella Amoako4; Evelyn B. Quansah; Frederick Kumi-Ansah; Frederick Tei-Maya; Gordon A Awandare; Joyce M. Ngoi; Kesego Tapela; Lucas N. Amenga-Etego; Nelson Kibinge; Oliver D Boakye5; Peter K Quashie; Philip M. Soglo; Samirah Saiid; Samuel Kaba Akoriya; Theophilus Odoom; Vanessa Magnussen; Vincent Appiah; Yaw Bediako                                                                                                                                                                                                                                                                                                                                                                                                                                                                                                                                                                                                                                                                                                |
| EPI_ISL_413221, EPI_ISL_414027, EPI_ISL_415630, EPI_ISL_415631<br>EPI_ISL_433362, EPI_ISL_461603, EPI_ISL_612306<br>EPI_ISL_2204308                                                                                                                                                                                                                                                                                                                                                                         | West of Scotland Specialist Virology Centre, NHSGGC<br><br>West of Scotland Specialist Virology Centre, NHSGGC / MRC-University of Glasgow Centre for Virus Research<br><br>Wheeling Hospital                                                                                   | MRC-University of Glasgow Centre for Virus Research<br><br>COVID-19 Genomics UK (COG-UK) Consortium<br><br>WVU and Marshall University Combined Genomics Core Facilities                                                                                                                                                   | Alasdair MacLean; Ana da Silva Filipe; Andrew Rambaut; Antonia Ho; Daniel Mair; David L Robertson; Emma Thomson; Emma Thomson.; James Shephard; Josh Singer; Kathy Li; Kathy Smollett; Natasha Jesudason; Richard Orton; Rory Gunson; Rory Gunson.; Shirin Ashraf; Stephen Carmichael<br><br>Alasdair MacLean; Ana da Silva Filipe; Antonia Ho; Daniel Mair; David L Robertson; Elihu Aranday-Cortes; Emma Thomson; Igor Starinski; James Shepherd; Jenna Nichols; Joseph Hughes; Kathy Li; Kathy Smollett; Kirstyn Brunker; Kyriaki Nomikou; Lily Tong; Marc Niebel; Natasha Jesudason; Natasha Johnson; Pataweew Asamaphan; Rajiv Shah; Richard Orton; Rory Gunson; Sarah McDonald; Sreenu Vattipally; Stephen Carmichael; Yasmin Parr<br><br>James Denvir; Peter Perrotta; Peter Stoilov; Ryan Percifield; Wesley Kimble                                                                                                                                                                                                                                                                                                                                                    |
| EPI_ISL_3221217<br>EPI_ISL_408670                                                                                                                                                                                                                                                                                                                                                                                                                                                                           | Willis-Knighton Medical Center Hospital Laboratory<br><br>Wisconsin Department of Health Services                                                                                                                                                                               | LSUHS Emerging Viral Threat Laboratory<br><br>Pathogen Discovery, Respiratory Viruses Branch, Division of Viral Diseases, Centers for Diseases Control and Prevention                                                                                                                                                      | Alexander Mijalis; Andrew D. Yurochko; Christopher G. Kevill; Gregory L. Ware; Jennifer L. Carroll; Jeremy P. Kamil; John A. Vanchiere; Maarten Van Diest; Rona S. Scott<br><br>Anna Uehara; Brett L. Whitaker; Brian Lynch; Clinton R. Paden; Janna' R. Murray; Jing Zhang; Krista Queen; Lijuan Wang; Senthil Kumar K. Sakthivel; Shifaq Kamili; Stephen Lindstrom; Susan I. Gerber; Suxiang Tong; Xiaoyan Lu; Yan Li; Ying Tao                                                                                                                                                                                                                                                                                                                                                                                                                                                                                                                                                                                                                                                                                                                                              |
| EPI_ISL_1067884, EPI_ISL_1295369, EPI_ISL_1295378, EPI_ISL_1420994, EPI_ISL_1421319, EPI_ISL_1626161, EPI_ISL_1626202, EPI_ISL_1626233, EPI_ISL_1993870, EPI_ISL_1794250, EPI_ISL_1794403, EPI_ISL_1794557, EPI_ISL_2018864, EPI_ISL_3234700, EPI_ISL_3234844, EPI_ISL_3234846, EPI_ISL_3234904<br>see above                                                                                                                                                                                                | Wisconsin State Laboratory of Hygiene Communicable Disease Division                                                                                                                                                                                                             | Wisconsin State Laboratory of Hygiene Communicable Disease Division                                                                                                                                                                                                                                                        | Abigail C. Shockey; Alicia J. Mooney; Erika M. Hanson; Kelsey R. Florek; Richard Griesser; Sara Wagner; Tonya Danz                                                                                                                                                                                                                                                                                                                                                                                                                                                                                                                                                                                                                                                                                                                                                                                                                                                                                                                                                                                                                                                             |
| EPI_ISL_1386221<br>EPI_ISL_450489                                                                                                                                                                                                                                                                                                                                                                                                                                                                           | Wojewodzka Stacja Sanitarno-Epidemiologiczna w Olsztynie, Laboratorium Badan Epidemiologiczno-Klinicznych<br><br>Wuhan Institute of Virology, Chinese Academy of Sciences                                                                                                       | Wojewodzka Stacja Sanitarno-Epidemiologiczna w Olsztynie, Laboratorium Badan Epidemiologiczno-Klinicznych<br><br>Wuhan Institute of Virology, Chinese Academy of Sciences                                                                                                                                                  | Aleksandra Kobiato; Barbara Dolinska; Emilia Tarabasz; Ewa Liszewska; Marta Lukian; Monika Czermanska; Patryk Bielecki; Paulina Rozycka; Sylwia Krzetowska; Tomasz Jakubczak<br><br>Lin, H.; Shi, Si, H.; Xie, S.; Z. and Zhou, P.; Zhu, Y.                                                                                                                                                                                                                                                                                                                                                                                                                                                                                                                                                                                                                                                                                                                                                                                                                                                                                                                                    |
| EPI_ISL_402132<br>EPI_ISL_402124, EPI_ISL_402127, EPI_ISL_402128<br>EPI_ISL_412982                                                                                                                                                                                                                                                                                                                                                                                                                          | Wuhan Jinyintan Hospital<br><br>Wuhan Jinyintan Hospital<br><br>Wuhan Lung Hospital                                                                                                                                                                                             | Hubei Provincial Center for Disease Control and Prevention<br><br>Wuhan Institute of Virology, Chinese Academy of Sciences<br><br>Hubei Provincial Center for Disease Control and Prevention                                                                                                                               | Bin Fang; Bo Yang; Bo Yu; Faxian Zhan; Guojun Ye; Jing Li; Junqiang Xu; Kun Cai; Linlin Liu; Xiang Li; Xiao Yu; Xixiang Huo; Yongzhong Jiang.<br><br>Ding-Yu Zhang; Hao-Rui Si; Lei Zhang; Peng Zhou; Xing-Lou Yang; Yan Zhu; Zhengli Shi<br><br>Bin Fang; Bo Yang; Bo Yu; Faxian Zhan; Guojun Ye; Jing Li; Junqiang Xu; Kun Cai; Linlin Liu; Xiang Li; Xiao Yu; Xixiang Huo; Yongzhong Jiang.                                                                                                                                                                                                                                                                                                                                                                                                                                                                                                                                                                                                                                                                                                                                                                                 |
| EPI_ISL_632159<br>EPI_ISL_1673699                                                                                                                                                                                                                                                                                                                                                                                                                                                                           | Wyckoff Heights Medical Center<br><br>Wyoming Public Health Laboratory                                                                                                                                                                                                          | New York City Public Health Laboratory<br><br>Center for Global Health, University of New Mexico Health Sciences Center                                                                                                                                                                                                    | Jade Wang; et al.<br><br>Cari Sloma; Darrell Dinwidde; Daryl Domman; Kurt Schwalm; Noah Hull; Rob Christensen; Valerie Morley; Wanda Manley                                                                                                                                                                                                                                                                                                                                                                                                                                                                                                                                                                                                                                                                                                                                                                                                                                                                                                                                                                                                                                    |
| EPI_ISL_819216, EPI_ISL_1615567, EPI_ISL_1786618, EPI_ISL_2009108, EPI_ISL_3207434, EPI_ISL_3207448, EPI_ISL_3207470, EPI_ISL_3207471, EPI_ISL_3242477, EPI_ISL_3242810, EPI_ISL_3246078, EPI_ISL_3246079, EPI_ISL_3253321<br>see above                                                                                                                                                                                                                                                                     | Wyoming Public Health Laboratory                                                                                                                                                                                                                                                | Wyoming Public Health Laboratory                                                                                                                                                                                                                                                                                           | Ashley Norberg; Bailey Bowcutt; Brian Dominguez; Brittany Oher; Cari Sloma; Channing Weber; Chayse Rowley; Elliot Thomasson; Jim Mildenberg; Lynette Gumbleton; Marley Goetz; Noah Hull; Robert Petit; Sam Britz; Taylor Fearing; Wanda Manley; and Rob Christensen; and Wanda Manley                                                                                                                                                                                                                                                                                                                                                                                                                                                                                                                                                                                                                                                                                                                                                                                                                                                                                          |
| EPI_ISL_1447526, EPI_ISL_1447626, EPI_ISL_1674622, EPI_ISL_1963749, EPI_ISL_3236405, EPI_ISL_3236413, EPI_ISL_3236456<br>see above                                                                                                                                                                                                                                                                                                                                                                          | Yale Clinical Virology Lab<br><br>Yale Clinical Virology Lab<br><br>Yale Pathology Lab                                                                                                                                                                                          | Grubaugh Lab - Yale School of Public Health<br><br>Yale Center for Genomic Analysis<br><br>Grubaugh Lab - Yale School of Public Health                                                                                                                                                                                     | Anderson Brito; Annie Watkins; Chaney Kalinich; Chantal Vogels; Isabel Ott; Jessica Rothman; Joseph Fauver; Kendall Billig; Mallery Breban; Marie L. Landry; Mary Petrone; Nathan Grubaugh; Tara Alpert; Tobias Koch<br><br>Brooke Sullivan; Christopher Castaldi; Curt Scharfe; Irina Tikhonova; Kaya Bilguvar; Shrikant Mane<br><br>Anderson Brito; Annie Watkins; Chaney Kalinich; Chantal Vogels; Chen Liu; Isabel Ott; Jessica Rothman; Jianhui Wang; Joseph Fauver; Kendall Billig; Mallery Breban; Mary Petrone; Nathan Grubaugh; Pei Hui; Tara Alpert; Tobias Koch                                                                                                                                                                                                                                                                                                                                                                                                                                                                                                                                                                                                     |
| EPI_ISL_3183633<br>EPI_ISL_3188979, EPI_ISL_3188994<br>EPI_ISL_3233594<br>EPI_ISL_733514, EPI_ISL_1993472<br>EPI_ISL_404227                                                                                                                                                                                                                                                                                                                                                                                 | Yamagata Prefectural Institute of Public Health<br><br>ZANGIATA INFECTIOUS CLINICAL HOSPITAL №2<br><br>ZOL<br>ZOTZ KLIMAS MVZ Düsseldorf-Centrum GBR ÜBAG für Labormedizin, Genetik, Zytologie, Pathologie<br><br>Zhejiang Provincial Center for Disease Control and Prevention | Yamagata Prefectural Institute of Public Health<br><br>Biotechnology laboratory, Center for advanced technology<br><br>Jessa<br>Center of Medical Microbiology, Virology, and Hospital Hygiene, University of Duesseldorf<br><br>Department of Microbiology, Zhejiang Provincial Center for Disease Control and Prevention | Akinobu Wada; Hideyuki Shinohara; Junji Seto; Katsumi Mizuta; Kenichi Komabayashi; Kentaro Itokawa; Makoto Kuroda; Masanori Hashino; Midori Taruishi; Mika Sampei; Naomi Ogawa; Rina Tanaka; Tsuyoshi Sekizuka; Waka Tanaka; Yoko Aoki; Yoko Ikeda; Yoshitaka Ishida<br><br>Abror Abdurakhimov; Alisher Abdullaev; Dilbar Dalimova; Diyora Dalimova; Elena Tsay; Gul Esonova; Ibragimova Shahnoza; Shakhlo Turdikulova; Sharof Nuriddinov; Vladimir Tsoy; Zebinisa Mirakbarova<br><br>Marijke Raymaekers et al. on behalf of the Jessa_cmdLab<br><br>Alexander Dilthey; Andreas Walker; Ashley-Jane Duplessis; Daniel Strelow; Jessica Nicola; Jörg Timm; Katrin Hoffmann; Klaus Pfeffer; Lisanna Hülse; Malte Kohns Vasconcelos; Marek Korencak; Maximilian Damagnez; Nadine Lübke; Patrick Finzer; Rainer Zotz; Tobias Wienemann; Torsten Houwaart<br><br>Chen Chen; Chonggao Hu; Enfu Chen; Fang Xu; Haiyan Mao; Hanping Zhu; Hao Yan; Jian Gao; Jianmin Jiang; Junhang Pan; Juying Yan; Liming Gong; Qiong Ge; Wen Shi; Wenwu Yao; Xinying Wang; Xiuyu Lou; Yan Feng; Yanjun Zhang; Yi Sun; Yin Chen; Yisheng Sun; Yiyu Lu; Zhangnv Yang; Zhen Li; Zhen Wang; Zhiping Chen |
| EPI_ISL_1564127, EPI_ISL_1572879, EPI_ISL_1573018, EPI_ISL_1645021, EPI_ISL_1727243<br>EPI_ISL_1281339<br>EPI_ISL_1645035                                                                                                                                                                                                                                                                                                                                                                                   | amedes GÄttingen<br><br>amedes MVZ DIAMEDIS Sennestadt<br>amedes MVZ Hannover                                                                                                                                                                                                   | Robert Koch Institute<br><br>Robert Koch Institute<br>Robert Koch Institute                                                                                                                                                                                                                                                |                                                                                                                                                                                                                                                                                                                                                                                                                                                                                                                                                                                                                                                                                                                                                                                                                                                                                                                                                                                                                                                                                                                                                                                |

|                                                                                                                                                                                                                                                                                                                |                                                        |                                                                                                                                            |                                                                                                                                                                                                                                                                                                                                                                                                                                                                                                                                                                                                                                                                                                                                                                                                                                                                                   |
|----------------------------------------------------------------------------------------------------------------------------------------------------------------------------------------------------------------------------------------------------------------------------------------------------------------|--------------------------------------------------------|--------------------------------------------------------------------------------------------------------------------------------------------|-----------------------------------------------------------------------------------------------------------------------------------------------------------------------------------------------------------------------------------------------------------------------------------------------------------------------------------------------------------------------------------------------------------------------------------------------------------------------------------------------------------------------------------------------------------------------------------------------------------------------------------------------------------------------------------------------------------------------------------------------------------------------------------------------------------------------------------------------------------------------------------|
| EPI_ISL_1565203,<br>EPI_ISL_2115837,<br>EPI_ISL_2130630                                                                                                                                                                                                                                                        | amedes MVZ FÃ¼r Laboratoriumsdiagnostik Raubling GmbH  | Robert Koch Institute                                                                                                                      |                                                                                                                                                                                                                                                                                                                                                                                                                                                                                                                                                                                                                                                                                                                                                                                                                                                                                   |
| EPI_ISL_1727200                                                                                                                                                                                                                                                                                                | amedes MVZ FÃ¼r Laboratoriumsmedizin MÃ¼nchen          | Robert Koch Institute                                                                                                                      |                                                                                                                                                                                                                                                                                                                                                                                                                                                                                                                                                                                                                                                                                                                                                                                                                                                                                   |
| EPI_ISL_2422426                                                                                                                                                                                                                                                                                                | cerballiance-ARA                                       | Cerba lab                                                                                                                                  | BÃ©nÃ©dicte Roquebert; Charles Leclerc; Emmanuel Chanard; Emmanuel Lecorche; Laura Verdurme; Sabine Trombert-Paolantoni; Samuel Granjon; StÃ©phanie Haïm-Boukobza                                                                                                                                                                                                                                                                                                                                                                                                                                                                                                                                                                                                                                                                                                                 |
| EPI_ISL_2425546                                                                                                                                                                                                                                                                                                | cerballiance-HDF                                       | Cerba lab                                                                                                                                  | Anne Mainardi; BÃ©nÃ©dicte Roquebert; Claire Felloni; Emmanuel Lecorche; Jean-Michel Damien; Laura Verdurme; Sabine Trombert-Paolantoni; StÃ©phanie Haïm-Boukobza                                                                                                                                                                                                                                                                                                                                                                                                                                                                                                                                                                                                                                                                                                                 |
| EPI_ISL_2094424,<br>EPI_ISL_2323007                                                                                                                                                                                                                                                                            | cerballiance-IDF                                       | Cerba lab                                                                                                                                  | Aude Lessenne; BÃ©nÃ©dicte Roquebert; Emmanuel Lecorche; Kader Merah; Laura Verdurme; Patrice Herisson; Sabine Trombert-Paolantoni; StÃ©phanie Haïm-Boukobza; Thierry Collin                                                                                                                                                                                                                                                                                                                                                                                                                                                                                                                                                                                                                                                                                                      |
| EPI_ISL_2425598                                                                                                                                                                                                                                                                                                | cerballiance-PACA                                      | Cerba lab                                                                                                                                  | Bruno Roure; BÃ©nÃ©dicte Roquebert; Edouard Delaunay; Emmanuel Lecorche; Isabelle Butin; Jean-Christophe Roig; Laura Verdurme; Laurence Prots; Sabine Trombert-Paolantoni; StÃ©phanie Haïm-Boukobza                                                                                                                                                                                                                                                                                                                                                                                                                                                                                                                                                                                                                                                                               |
| EPI_ISL_417535, EPI_ISL_417537, EPI_ISL_417538, EPI_ISL_417539, EPI_ISL_417541, EPI_ISL_417542, EPI_ISL_417544, EPI_ISL_417552, EPI_ISL_417657, EPI_ISL_417660, EPI_ISL_417663, EPI_ISL_417665, EPI_ISL_417672, EPI_ISL_826993, EPI_ISL_827013, EPI_ISL_828858, EPI_ISL_829019, EPI_ISL_829271, EPI_ISL_829858 | see above                                              | deCODE genetics                                                                                                                            | Agnar Helgason; Alma Moller; Arna B Agustsdottir; Arnaldur Gylfason; Asgeir Sigurdsson; Aslaug Jonasdottir; Berglind Eiríksdottir; Bjarni Thorbjörnsson; Brynjar O Jensson; Daniel F Gudbjartsson; Droplaug N Magnusdottir; Elisabet E Gardarsdottir; Emil A Thorarensen; Gardar Sveinbjörnsson; Gisli Masson; Gudmundur Georgsson; Gudmundur L Norddahl; Gudrun Sigmundsdottir; Hakon Jonsson; Hannes Eggertsson; Hilma Holm; Ingileif Jonsdottir; Jona Saemundsdottir; Kamilla S Josefsdottir; Kari Stefansson; Kari G Kristinsson; Kjartan R Gudmundsson; Kristin E Sveinsdottir; Kristin E Sveinsdottir; Louise le Roux; Maney Sveinsdottir; Olafia S Gretarsdottir; Olafia S Gretarsdottir; Olafur T Magnusson; Pall Melsted; Patrick Sulem; Run Fridriksdottir; Solvi Rognvaldsson; Thora R Gunnarsdottir; Thordur Kristjansson; Thorolfur Gudnason; Unnur Thorsteinsdottir |
| EPI_ISL_872243                                                                                                                                                                                                                                                                                                 | hopital                                                | National Reference Center for Viruses of Respiratory Infections, Institut Pasteur, Paris                                                   | Angela Brisebarre; Camille Capel; Combe Patrice; Etienne Simon-Lorière; Marion Barbet; Maud Vanpeene; Méline Bizard; Sylvie Behillili; Sylvie van der Werf; Vincent Enouf                                                                                                                                                                                                                                                                                                                                                                                                                                                                                                                                                                                                                                                                                                         |
| EPI_ISL_1696168,<br>EPI_ISL_1757844                                                                                                                                                                                                                                                                            | laboratoire Belle Epine                                | Department of Virology, Henri Mondor University Hospital, Assistance Publique Hôpitaux de Paris, Université Paris-Est Créteil, INSERM U955 | Alexandre Soulier; Christophe Rodriguez; Elisabeth Trawinski; Guillaume Gricourt; Jean-Michel Pawlotsky; Melissa N'Debi; Slim Fourati; Vanessa Demontant                                                                                                                                                                                                                                                                                                                                                                                                                                                                                                                                                                                                                                                                                                                          |
| EPI_ISL_2617445,<br>EPI_ISL_3691430                                                                                                                                                                                                                                                                            | laboratorio Microbiologia PO Cardarelli                | laboratorio Microbiologia PO Cardarelli                                                                                                    | Felice V.; Niro G. Scutella' M.                                                                                                                                                                                                                                                                                                                                                                                                                                                                                                                                                                                                                                                                                                                                                                                                                                                   |
| EPI_ISL_450500,<br>EPI_ISL_450502                                                                                                                                                                                                                                                                              | unknown                                                | CAS Key Laboratory of Special Pathogens and Biosafety and Center for Emerging Infectious Diseases                                          | Lin, H.; Shi, Z.; Si, H.; Xie, S.; Zhou, P.; Zhu, Y.                                                                                                                                                                                                                                                                                                                                                                                                                                                                                                                                                                                                                                                                                                                                                                                                                              |
| EPI_ISL_413584                                                                                                                                                                                                                                                                                                 | unknown                                                | Erasmus Medical Center                                                                                                                     | Anne van der Linden; Annemiek van der Eijk; Aura Timen; Bas Oude Munnink; Claudia Schapendonk; Corien Swaan; Corine GeurtsvanKessel; David Nieuwenhuijse; Irina Chestakova; Jeroen van Kampen; Jolanda Voermans; Madelief Mollers; Manon Haverkate; Marion Koopmans; Mark Pronk; Mart Stein; Pascal Lexmond; Reina Sikkema; Richard Molenkamp; Sandra Kengne Kamga Mobou; on behalf of the Dutch national COVID-19 response team.                                                                                                                                                                                                                                                                                                                                                                                                                                                 |
| EPI_ISL_434565,<br>EPI_ISL_434567,<br>EPI_ISL_434568,<br>EPI_ISL_434569                                                                                                                                                                                                                                        | unknown                                                | Microbiology, The University of Hong Kong                                                                                                  | K.-Y.; K.K.W. and Yuen; To                                                                                                                                                                                                                                                                                                                                                                                                                                                                                                                                                                                                                                                                                                                                                                                                                                                        |
| EPI_ISL_415651,<br>EPI_ISL_415652                                                                                                                                                                                                                                                                              | unknown                                                | National Reference Center for Viruses of Respiratory Infections, Institut Pasteur, Paris                                                   | Angela Brisebarre; Flora Donati Vincent Enouf; Marion Barbet; Maud Vanpeene; Méline Bizard; Mélinie Albert; Sylvie Behillili; Sylvie van der Werf                                                                                                                                                                                                                                                                                                                                                                                                                                                                                                                                                                                                                                                                                                                                 |
| EPI_ISL_413606,<br>EPI_ISL_413612,<br>EPI_ISL_413613,<br>EPI_ISL_413615,<br>EPI_ISL_413617,<br>EPI_ISL_413622                                                                                                                                                                                                  | unknown                                                | Pathogen Discovery, Respiratory Viruses Branch, Division of Viral Diseases, Centers for Disease Control and Prevention                     | Alison S Laufer Halpin; Anna Uehara; Brett L. Whitaker; Brian Lynch; Christopher A. Elkins; Clinton R. Paden; Haibin Wang; Janna' R. Murray; Jasmine Padilla; Jing Zhang; Justin Lee; Krista Queen; Lijuan Wang; Mary S. Keckler; Senthil Kumar K. Sakthivel; Shifaq Kamili; Stephen Lindstrom; Susan I. Gerber; Suxiang Tong; Xiaoyan Lu; Yan Li; Ying Tao                                                                                                                                                                                                                                                                                                                                                                                                                                                                                                                       |
| EPI_ISL_414480,<br>EPI_ISL_414482,<br>EPI_ISL_414485                                                                                                                                                                                                                                                           | unknown                                                | Pathogen Discovery, Respiratory Viruses Branch, Division of Viral Diseases, Centers for Disease Control and Prevention                     | Alison S. Laufer Halpin; Anna Uehara; Brett L. Whitaker; Brian Lynch; Christopher A. Elkins; Clinton R. Paden; Haibin Wang; Janna' R. Murray; Jasmine Padilla; Jing Zhang; Justin Lee; Krista Queen; Lijuan Wang; Mary S. Keckler; Senthil Kumar K. Sakthivel; Shifaq Kamili; Stephen Lindstrom; Susan I. Gerber; Suxiang Tong; Xiaoyan Lu; Yan Li; Ying Tao                                                                                                                                                                                                                                                                                                                                                                                                                                                                                                                      |
| EPI_ISL_2017854                                                                                                                                                                                                                                                                                                | "St. Parascheva" Infectious Diseases Clinical Hospital | Cantacuzino Institute Virology                                                                                                             | Catalina Pascu; Luiza Ustea; Mihaela Lazar; Mihaela Oprea; Nicoleta Paraschiv; Sorin Dinu                                                                                                                                                                                                                                                                                                                                                                                                                                                                                                                                                                                                                                                                                                                                                                                         |
